# Supplementary material for: GLI transcriptional repression regulates tissue-specific enhancer activity in response to Hedgehog signaling
Source: PubMed Central journal article supplement (PMC6986877; doi:10.7554/elife.50670), 2020-01-28
Supplement: elife-50670-fig1-data4.pdf [file elife-50670-fig1-data4.pdf]

Figure1-Source Data4: Enrichment of de novo motifs in HH-responsive GBRs

| Motif ID               | Logo | Enrichment |
|------------------------|------|------------|
| HH-resp_0.mat          |      | 1.289071   |
| HH-resp_1.mat          |      | 1.151352   |
| HH-resp_2.mat<br>(GLI) |      | 2.386835   |
| HH-resp_3.mat          |      | 1.002307   |
| HH-resp_4.mat          |      | 1.550095   |
