# Supplementary material for: GLI transcriptional repression regulates tissue-specific enhancer activity in response to Hedgehog signaling
Source: PubMed Central journal article supplement (PMC6986877; doi:10.7554/elife.50670), 2020-01-28
Supplement: elife-50670-fig2-data2.pdf [file elife-50670-fig2-data2.pdf]

Figure 2-Source Data 2

| Gene        | H3K27Me3_FC | Short_adjpv | HH-dependent target |
|-------------|-------------|-------------|---------------------|
| Gli1        | 1.34490223  | 0.002457103 | 1                   |
| Mt1         | 1.36777668  | 0.002068091 | 0                   |
| Ptch2       | 1.0845207   | 0.591361833 | 1                   |
| Mt2         | 1.37889954  | 0.000563889 | 0                   |
| Fgf4        | 1.36514633  | 0.000514682 | 0                   |
| Sall1       | 1.50748216  | 3.81E-05    | 1                   |
| Fgf8        | 1.600302    | 5.21E-06    | 0                   |
| Slc30a1     | 0.96814871  | 0.929072999 | 0                   |
| Mamdc2      | 0.97024369  | 0.929072999 | 1                   |
| Ptch1       | 1.48290388  | 0.00011109  | 1                   |
| Hoxd12      | 1.7969164   | 3.07E-08    | 1                   |
| Ina         | 1.42003055  | 0.000131206 | 0                   |
| Mir124a-1hg | 1.54781072  | 8.83E-06    | 0                   |
| Tubb3       | 1.3489779   | 0.002457103 | 0                   |
| Elavl3      | 1.38482142  | 0.001302466 | 0                   |
| Stmn2       | 1.1029505   | 0.529131937 | 0                   |
| Myt1        | 0.92698572  | 0.627708147 | 1                   |
| Ano1        | 0.97425689  | 0.929072999 | 0                   |
| Thy1        | 1.19988578  | 0.094851821 | 0                   |
| Gpnmb       | 1.19691299  | 0.156859893 | 0                   |
| Hsd11b2     | 0.97457349  | 0.929072999 | 0                   |
| Greb1       | 1.06487551  | 0.713614996 | 1                   |
| Hoxd13      | 1.55695651  | 1.08E-05    | 1                   |
| Nhlh2       | 1.20677635  | 0.094851821 | 0                   |
| Sall3       | 1.56665916  | 3.91E-05    | 0                   |
| Rfx4        | 1.68784771  | 3.27E-07    | 0                   |
| Nhlh1       | 0.96253975  | 0.909663337 | 0                   |
| Msi2        | 0.97613828  | 0.936366345 | 0                   |
| Msx3        | 1.33056839  | 0.001806362 | 0                   |
| Frem1       | 1.03743772  | 0.905527071 | 0                   |
| Robo3       | 1.52603201  | 1.52E-05    | 0                   |
| Cntn2       | 1.22373691  | 0.059298238 | 1                   |
| Kif1a       | 1.26492201  | 0.009168305 | 0                   |
| Aox3        | 1.01691291  | 0.955544074 | 0                   |
| Mtus1       | 1.20714392  | 0.100527233 | 1                   |
| Pou3f2      | 1.30711352  | 0.006055122 | 1                   |
| Fabp7       | 0.92104024  | 0.627708147 | 0                   |
| Neurod4     | 1.04620288  | 0.867697342 | 0                   |
| Enpp2       | 1.02202012  | 0.945464854 | 1                   |
| Grem1       | 1.15556618  | 0.229282288 | 1                   |
| Miat        | 1.1223053   | 0.325154174 | 0                   |
| Parp14      | 1.39479722  | 0.000848495 | 0                   |
| Car12       | 0.93955245  | 0.697658484 | 0                   |

Figure 2-Source Data 2

|         |            |             |   |
|---------|------------|-------------|---|
| Rgs18   | 1.00838348 | 0.965607117 | 0 |
| Sox2    | 1.40513276 | 0.000281732 | 1 |
| Sost    | 1.17835263 | 0.204126463 | 0 |
| Slc17a6 | 1.09351019 | 0.591361833 | 0 |
| Kdm5d   | 1.12891816 | 0.634835736 | 0 |
| Hoxd11  | 1.45990474 | 3.99E-05    | 1 |
| Scrt2   | 1.39917125 | 0.000848495 | 0 |
| Fibin   | 1.01332123 | 0.955544074 | 0 |
| Chrna3  | 1.19279646 | 0.094851821 | 0 |
| Chl1    | 1.0004852  | 0.995733302 | 0 |
| Akap6   | 0.99519542 | 0.971681078 | 0 |
| Epha3   | 1.01187877 | 0.955544074 | 0 |
| Slc1a2  | 1.15025866 | 0.242629347 | 1 |
| Srrm4   | 1.2161958  | 0.059298238 | 0 |
| Mtmr11  | 0.97050852 | 0.929072999 | 0 |
| Snord55 | 0.88604078 | 0.343358607 | 1 |
| Cdk6    | 1.1884482  | 0.156859893 | 0 |
| Acss2   | 1.06991533 | 0.686840634 | 0 |
| Tfap2c  | 1.35243691 | 0.000848495 | 0 |
| Ucp2    | 1.09326469 | 0.561706538 | 1 |
| Scg3    | 0.9882618  | 0.955544074 | 0 |
| Zic1    | 1.53793    | 3.76E-05    | 0 |
| Hemgn   | 1.00712947 | 0.965607117 | 1 |
| Ccnd1   | 1.16917452 | 0.244212035 | 0 |
| Ppp2r2c | 1.25145183 | 0.01523463  | 0 |
| Pappa2  | 0.95490857 | 0.867697342 | 0 |
| Apcdd1  | 1.01506751 | 0.955544074 | 0 |
| Olig3   | 1.60708952 | 5.68E-06    | 0 |
| Dock6   | 0.98955402 | 0.955544074 | 0 |
| Gpr50   | 1.43701235 | 0.000514682 | 0 |
| Adgre5  | 1.14922628 | 0.27683288  | 0 |
| Lmo2    | 1.13289455 | 0.329980757 | 0 |
| Lilrb4a | 0.97122391 | 0.93422666  | 0 |
| Elavl4  | 0.92294656 | 0.683227178 | 1 |
| Krt15   | 1.10060766 | 0.591361833 | 0 |
| Gja8    | 1.15535817 | 0.284854885 | 1 |
| C3      | 1.06516189 | 0.721996352 | 0 |

**Figure 2-Source Data 2. Hedgehog responsive genes with H3K27me3 enrichment.**

The first column indicates genes previously identified as differentially expressed between *Shh*<sup>-/-</sup> and WT E10.5 limb buds (Lewandowski et al. 2015). The second column indicates the fold enrichment of H3K27me3 at the promoter compared to Input with the adjusted P-value indicated in the third column. The fourth column indicates whether the gene has a HH-dependent GBR (indicated by 1 and yellow shading) within the same

presumptive TAD (Dixon et al. 2012). There are 22 HH-dependent target genes out of 80 HH-responsive genes.
