# Supplementary material for: GLI transcriptional repression regulates tissue-specific enhancer activity in response to Hedgehog signaling
Source: eLife. 2020 Jan 28;9:e50670. doi: 10.7554/eLife.50670 (PMC6986877; doi:10.7554/eLife.50670)
Supplement: Figure 1—source data 1. — GLI3 binding regions with called peaks with a false discovery rate (FDR) < 0.05 from two biological replicates of E10.5 (32–35S) forelimbs. Rank ordered coordinates, peak length, log2 fold change (log2FC) and FDR are listed for each peak. [file elife-50670-fig1-data1.xlsx]

## Sheet: E10_peak
#rank	chromosome	start	end	strand	peak_length	max_log2FC	FDR
1	chr8	84655250	84657299	+	2050	6.37397	0
2	chr13	63562500	63569599	+	7100	6.05323	0
3	chr19	5071050	5072599	+	1550	5.9347	0
4	chrX	137037750	137038699	+	950	5.92237	0
5	chr8	121300500	121301999	+	1500	5.91167	0
6	chr8	4238350	4239299	+	950	5.76508	0
7	chr10	127339000	127342549	+	3550	5.75698	0
8	chr4	114821400	114822649	+	1250	5.62798	0
9	chr5	115300300	115301599	+	1300	5.58917	0
10	chr9	73103200	73104149	+	950	5.57348	0
11	chr4	126201650	126203449	+	1800	5.49671	0
12	chr4	108362550	108363799	+	1250	5.29194	0
13	chr11	95990300	95992149	+	1850	5.29179	0
14	chr4	135166200	135167449	+	1250	5.2206	0
15	chr2	30657600	30659349	+	1750	5.2085	0
16	chr5	113800150	113800799	+	650	5.20264	0
17	chr5	143000750	143001499	+	750	5.12108	0
18	chr11	101225800	101226849	+	1050	5.09935	0
19	chr13	63572450	63574449	+	2000	5.04038	0
20	chr8	11008950	11010049	+	1100	5.03564	0
21	chr16	4658550	4659249	+	700	5.00205	0
22	chr11	78188400	78190199	+	1800	4.97484	0
23	chr5	139724400	139725399	+	1000	4.96412	0
24	chr13	63950950	63952649	+	1700	4.9528	0
25	chr1	155212150	155213299	+	1150	4.94996	0
26	chr7	37464050	37464849	+	800	4.92938	0
27	chr2	121955750	121956649	+	900	4.92422	0
28	chr3	39962000	39963049	+	1050	4.92251	0
29	chr5	150665050	150666099	+	1050	4.88988	0
30	chr8	105519700	105520749	+	1050	4.86756	0
31	chr17	34120600	34123149	+	2550	4.8647	0
32	chr2	32317150	32318499	+	1350	4.8586	0
33	chr17	35896700	35897849	+	1150	4.85684	0
34	chr14	69732350	69732949	+	600	4.85495	0
35	chr18	67724200	67724849	+	650	4.85247	0
36	chr17	45685900	45686999	+	1100	4.85138	0
37	chr6	100402400	100403249	+	850	4.84714	0
38	chr16	21210650	21211649	+	1000	4.84657	0
39	chr7	83813750	83814549	+	800	4.82711	0
40	chr3	88509800	88510499	+	700	4.82508	0
41	chr16	4651600	4652699	+	1100	4.81706	0
42	chr1	155083050	155084499	+	1450	4.81366	0
43	chr16	94195750	94196549	+	800	4.80621	0
44	chr13	51314400	51315099	+	700	4.79762	0
45	chr11	115219800	115220399	+	600	4.79542	0
46	chr16	96191650	96192949	+	1300	4.77811	0
47	chr17	45756500	45757399	+	900	4.761	0
48	chr5	3341150	3344199	+	3050	4.7526	0
49	chr11	3289300	3290299	+	1000	4.74769	0
50	chr17	29463600	29464799	+	1200	4.74168	0
51	chr7	16876200	16877299	+	1100	4.73443	0
52	chr4	133813100	133814849	+	1750	4.71813	0
53	chr8	120407700	120408349	+	650	4.7049	0
54	chr16	4964000	4964849	+	850	4.68356	0
55	chr13	28640800	28641449	+	650	4.66794	0
56	chr14	55823050	55824699	+	1650	4.65711	0
57	chr2	18055800	18057149	+	1350	4.65364	0
58	chr14	62292800	62293649	+	850	4.64764	0
59	chr10	117583500	117584149	+	650	4.64611	0
60	chr11	76945350	76946149	+	800	4.63608	0
61	chr2	167563200	167564399	+	1200	4.62772	0
62	chr13	91370550	91371499	+	950	4.62003	0
63	chr2	167597100	167597799	+	700	4.61025	0
64	chr9	109094600	109096049	+	1450	4.61023	0
65	chr6	72216600	72217399	+	800	4.60414	0
66	chr3	51483800	51484799	+	1000	4.60372	0
67	chr7	44603550	44604949	+	1400	4.5953	0
68	chr10	123076200	123076849	+	650	4.59284	0
69	chr10	120551750	120553049	+	1300	4.5925	0
70	chr16	85800750	85801799	+	1050	4.5849	0
71	chr16	30069300	30071049	+	1750	4.57428	0
72	chr16	4552800	4553299	+	500	4.55859	0
73	chr1	192855300	192856349	+	1050	4.5563	0
74	chr4	117095500	117096599	+	1100	4.55456	0
75	chr13	44795700	44796449	+	750	4.5493	0
76	chr17	48031200	48032249	+	1050	4.54213	0
77	chr4	141545150	141547249	+	2100	4.53963	0
78	chr11	3201950	3203099	+	1150	4.53526	0
79	chr16	18498450	18499199	+	750	4.53277	0
80	chr3	95658350	95660099	+	1750	4.52383	0
81	chr5	98166600	98167799	+	1200	4.5184	0
82	chr11	96318950	96320299	+	1350	4.51451	0
83	chr5	145139900	145140599	+	700	4.511	0
84	chr2	126674750	126676149	+	1400	4.50438	0
85	chr8	91612350	91612999	+	650	4.49513	0
86	chr5	142817000	142819449	+	2450	4.47882	0
87	chr2	45226950	45227849	+	900	4.47777	0
88	chr12	91589750	91590649	+	900	4.47589	0
89	chr9	106202750	106203249	+	500	4.46867	0
90	chr8	80318300	80319049	+	750	4.46141	0
91	chr10	17074550	17075399	+	850	4.43715	0
92	chr6	72711350	72712049	+	700	4.43713	0
93	chr9	62857800	62858749	+	950	4.43648	0
94	chr16	30067900	30068999	+	1100	4.43618	0
95	chr15	83666250	83666849	+	600	4.4298	0
96	chr9	32542900	32543549	+	650	4.42504	0
97	chr17	24209150	24209999	+	850	4.42327	0
98	chr3	31093450	31095349	+	1900	4.41387	0
99	chr17	29489700	29490849	+	1150	4.40988	0
100	chr19	28908150	28908599	+	450	4.40858	0
101	chr8	84742100	84743749	+	1650	4.40335	0
102	chr5	127318950	127319849	+	900	4.39854	0
103	chr1	43445100	43446399	+	1300	4.39743	0
104	chr12	8803400	8803949	+	550	4.38965	0
105	chr12	79683050	79683949	+	900	4.38951	0
106	chr17	27554900	27556249	+	1350	4.38502	0
107	chr11	84916000	84916599	+	600	4.37624	0
108	chr8	70609100	70610499	+	1400	4.37101	0
109	chr18	15155850	15156799	+	950	4.36623	0
110	chr9	37053000	37053749	+	750	4.35851	0
111	chr13	97576950	97578149	+	1200	4.34109	0
112	chr12	76255150	76255849	+	700	4.33385	0
113	chr7	127025900	127027849	+	1950	4.33233	0
114	chr5	30913000	30913749	+	750	4.33233	0
115	chr13	38036950	38037899	+	950	4.3259	0
116	chr11	88689700	88690549	+	850	4.3159	0
117	chr17	46086450	46086999	+	550	4.31332	0
118	chr4	135140550	135141099	+	550	4.31253	0
119	chr2	74673400	74674099	+	700	4.30733	0
120	chr12	80259150	80260999	+	1850	4.30133	0
121	chr1	178406050	178407099	+	1050	4.3003	0
122	chr9	59750350	59751399	+	1050	4.29879	0
123	chr9	40730400	40731149	+	750	4.2976	0
124	chr8	80314750	80315699	+	950	4.29727	0
125	chr11	8625450	8625999	+	550	4.29616	0
126	chr13	70637650	70638199	+	550	4.29296	0
127	chr19	10101450	10102399	+	950	4.29127	0
128	chr10	43722550	43723399	+	850	4.28842	0
129	chr5	144965850	144966399	+	550	4.28523	0
130	chr6	127250750	127252649	+	1900	4.28501	0
131	chr2	5044950	5045899	+	950	4.28265	0
132	chr11	114566900	114567799	+	900	4.2798	0
133	chr2	152925500	152926049	+	550	4.27877	0
134	chr15	103214800	103215699	+	900	4.27351	0
135	chr6	49214550	49216049	+	1500	4.26932	0
136	chr12	36793550	36794649	+	1100	4.25997	0
137	chr8	11634950	11635799	+	850	4.25844	0
138	chr12	109749750	109750349	+	600	4.25589	0
139	chr14	27065350	27066749	+	1400	4.25443	0
140	chr18	34382600	34383399	+	800	4.25064	0
141	chr1	179446200	179446949	+	750	4.24998	0
142	chr17	44300150	44301399	+	1250	4.2499	0
143	chr13	68581800	68582399	+	600	4.24118	0
144	chr2	84742050	84743249	+	1200	4.23356	0
145	chr13	56582050	56582799	+	750	4.2327	0
146	chr2	128125600	128126299	+	700	4.22138	0
147	chr7	25297500	25298099	+	600	4.2158	0
148	chr6	101296000	101296899	+	900	4.21566	0
149	chr17	4497800	4498849	+	1050	4.21396	0
150	chr3	95106650	95107149	+	500	4.20558	0
151	chr19	3912250	3913199	+	950	4.20216	0
152	chr4	119415300	119415849	+	550	4.20153	0
153	chr7	65693150	65693749	+	600	4.19824	0
154	chr7	142559550	142560399	+	850	4.19818	0
155	chr5	135724450	135725999	+	1550	4.19384	0
156	chr6	11907350	11907949	+	600	4.19085	0
157	chr6	52216700	52218049	+	1350	4.1889	0
158	chr5	113807850	113808499	+	650	4.17847	0
159	chr14	70635100	70636149	+	1050	4.17416	0
160	chr9	31030200	31030599	+	400	4.1722	0
161	chr19	46422300	46423149	+	850	4.16832	0
162	chr15	64579000	64579499	+	500	4.16702	0
163	chr4	140683850	140684799	+	950	4.16694	0
164	chr2	146958850	146959799	+	950	4.1612	0
165	chr13	56159450	56160399	+	950	4.15559	0
166	chr2	31339750	31340349	+	600	4.15452	0
167	chr12	9029500	9030699	+	1200	4.15333	0
168	chr3	87905800	87906599	+	800	4.15258	0
169	chr14	27067500	27068299	+	800	4.15073	0
170	chr11	88161050	88161749	+	700	4.1489	0
171	chr10	120475650	120477349	+	1700	4.1489	0
172	chr18	35873300	35875349	+	2050	4.14269	0
173	chr16	59638900	59639749	+	850	4.14266	0
174	chr9	32986800	32987499	+	700	4.13941	0
175	chr11	120231350	120231799	+	450	4.13331	0
176	chr11	69837600	69838749	+	1150	4.13268	0
177	chr1	93176450	93177299	+	850	4.13255	0
178	chr4	108459400	108460349	+	950	4.12981	0
179	chr11	60176600	60177499	+	900	4.12981	0
180	chr17	29416100	29416899	+	800	4.11973	0
181	chr5	125177300	125179899	+	2600	4.1183	0
182	chr9	64058150	64058899	+	750	4.11741	0
183	chr2	152411050	152411799	+	750	4.11543	0
184	chr10	75837150	75837799	+	650	4.11543	0
185	chr2	32534900	32535749	+	850	4.11501	0
186	chr8	120298450	120299149	+	700	4.11383	0
187	chr8	83898950	83900799	+	1850	4.10788	0
188	chr5	37917800	37918499	+	700	4.10641	0
189	chr11	109425750	109426599	+	850	4.10553	0
190	chr2	4298800	4299249	+	450	4.10489	0
191	chr9	61373650	61374449	+	800	4.1039	0
192	chr4	88032550	88033749	+	1200	4.0998	0
193	chr2	156839700	156840599	+	900	4.09947	0
194	chr16	30063100	30064449	+	1350	4.09806	0
195	chr9	102530800	102532049	+	1250	4.09774	0
196	chr7	29410950	29412099	+	1150	4.09774	0
197	chr17	43534500	43535499	+	1000	4.0952	0
198	chr14	31661700	31662799	+	1100	4.09302	0
199	chr7	142547850	142548499	+	650	4.09275	0
200	chr18	13972300	13972799	+	500	4.09196	0
201	chr2	4515850	4516149	+	300	4.09192	0
202	chr1	75833200	75833849	+	650	4.08824	0
203	chr11	118418850	118419399	+	550	4.08806	0
204	chr11	88693500	88694799	+	1300	4.08752	0
205	chr9	35326700	35327449	+	750	4.08245	0
206	chr7	70331100	70332199	+	1100	4.08245	0
207	chr8	120536750	120538149	+	1400	4.08193	0
208	chr2	163865800	163866449	+	650	4.08159	0
209	chr3	95624150	95625649	+	1500	4.08103	0
210	chr12	86894400	86895399	+	1000	4.07798	0
211	chr12	107979700	107981149	+	1450	4.07591	0
212	chr9	32720150	32720899	+	750	4.07177	0
213	chr8	89498000	89498549	+	550	4.07161	0
214	chr11	37031300	37031999	+	700	4.07016	0
215	chr12	25098500	25100099	+	1600	4.06774	0
216	chr8	83594050	83594999	+	950	4.06728	0
217	chr13	91460550	91461499	+	950	4.06386	0
218	chr7	109671550	109672649	+	1100	4.06095	0
219	chr13	64021000	64021399	+	400	4.0595	0
220	chr19	56651900	56652799	+	900	4.05375	0
221	chr5	122918100	122918699	+	600	4.05105	0
222	chr11	96005500	96008049	+	2550	4.05099	0
223	chr13	3712450	3713149	+	700	4.05049	0
224	chr16	94059600	94060299	+	700	4.04852	0
225	chr18	78237350	78238649	+	1300	4.04814	0
226	chr1	106759600	106760199	+	600	4.04307	0
227	chr1	59763000	59763949	+	950	4.04307	0
228	chr9	88438700	88439399	+	700	4.04207	0
229	chr16	96127600	96128449	+	850	4.04078	0
230	chr6	37870400	37871949	+	1550	4.03848	0
231	chr4	95317900	95318249	+	350	4.03798	0
232	chr2	15054950	15055549	+	600	4.03778	0
233	chr8	77829100	77829849	+	750	4.03751	0
234	chr3	21935550	21936399	+	850	4.03172	0
235	chr11	69681550	69682199	+	650	4.03095	0
236	chr8	111536050	111536899	+	850	4.03031	0
237	chr8	34080400	34080799	+	400	4.028	0
238	chr11	61484800	61485749	+	950	4.02392	0
239	chr19	44283950	44284749	+	800	4.02382	0
240	chr4	132269650	132270599	+	950	4.02009	0
241	chr7	19665000	19665549	+	550	4.01956	0
242	chr4	106839400	106840499	+	1100	4.01436	0
243	chr2	30707300	30708799	+	1500	4.01381	0
244	chr8	94903500	94904199	+	700	4.01377	0
245	chr3	8708850	8709499	+	650	4.01305	0
246	chr9	43252750	43253549	+	800	4.01185	0
247	chr4	156197350	156198099	+	750	4.00905	0
248	chr2	77280450	77281049	+	600	4.00574	0
249	chr4	133753950	133754649	+	700	4.00568	0
250	chr2	59673750	59674349	+	600	4.00568	0
251	chr7	90442550	90443249	+	700	3.99914	0
252	chr15	102998750	103000449	+	1700	3.99816	0
253	chr8	25840750	25841099	+	350	3.9951	0
254	chr2	116971900	116973299	+	1400	3.99479	0
255	chr15	56166150	56166749	+	600	3.99479	0
256	chr18	61609750	61610249	+	500	3.99114	0
257	chr9	106355900	106356749	+	850	3.98749	0
258	chr1	153900100	153900899	+	800	3.98735	0
259	chr17	83179000	83179649	+	650	3.98632	0
260	chr3	98990800	98991599	+	800	3.98456	0
261	chr8	85491850	85492849	+	1000	3.97806	0
262	chrX	101260550	101261299	+	750	3.9757	0
263	chr8	120276000	120277049	+	1050	3.97364	0
264	chr13	63528300	63528999	+	700	3.96982	0
265	chr12	79846500	79847399	+	900	3.96851	0
266	chr11	120310850	120311449	+	600	3.96604	0
267	chr11	98941850	98942899	+	1050	3.96578	0
268	chr15	73090300	73091049	+	750	3.96525	0
269	chr1	172617950	172618749	+	800	3.96382	0
270	chr13	63430900	63431899	+	1000	3.96003	0
271	chr16	15195200	15195749	+	550	3.95653	0
272	chr19	57610500	57610999	+	500	3.9548	0
273	chr4	139599050	139599499	+	450	3.95394	0
274	chr4	131484500	131485099	+	600	3.95231	0
275	chr9	101073450	101074649	+	1200	3.95066	0
276	chr6	100013750	100014399	+	650	3.95066	0
277	chr5	30154500	30155449	+	950	3.94898	0
278	chr5	134455450	134456999	+	1550	3.94838	0
279	chr13	53183100	53183699	+	600	3.94724	0
280	chr11	51637800	51638499	+	700	3.94641	0
281	chr15	75968800	75969499	+	700	3.94606	0
282	chr4	136147800	136148249	+	450	3.94535	0
283	chr4	139351950	139352649	+	700	3.94436	0
284	chr16	15052750	15053749	+	1000	3.94403	0
285	chr16	90628950	90629899	+	950	3.94321	0
286	chr10	80398550	80399499	+	950	3.94321	0
287	chr11	119042700	119043199	+	500	3.94176	0
288	chr6	72655150	72655949	+	800	3.94151	0
289	chr7	82865750	82867349	+	1600	3.93765	0
290	chr18	34954150	34954799	+	650	3.93666	0
291	chr11	61494200	61494899	+	700	3.93267	0
292	chr7	36707000	36707649	+	650	3.9326	0
293	chr4	47474000	47474749	+	750	3.93103	0
294	chr17	85932300	85933149	+	850	3.93028	0
295	chr2	152705700	152706399	+	700	3.92867	0
296	chr10	99261050	99263349	+	2300	3.92727	0
297	chr12	111813600	111814699	+	1100	3.92668	0
298	chr17	24761050	24761599	+	550	3.9264	0
299	chr7	126271900	126272599	+	700	3.92455	0
300	chr1	163314400	163315299	+	900	3.92432	0
301	chr16	30066100	30067199	+	1100	3.92384	0
302	chr10	128888750	128889699	+	950	3.92099	0
303	chr7	67950650	67952599	+	1950	3.91958	0
304	chr15	83678050	83679149	+	1100	3.91632	0
305	chr12	80114850	80115949	+	1100	3.91632	0
306	chr2	30821550	30821999	+	450	3.91623	0
307	chr2	152738600	152740149	+	1550	3.91357	0
308	chr6	24527350	24527899	+	550	3.91282	0
309	chr19	5803350	5804449	+	1100	3.90841	0
310	chr15	6708000	6708799	+	800	3.90561	0
311	chr4	87768050	87769049	+	1000	3.90139	0
312	chr2	32319100	32320149	+	1050	3.90139	0
313	chr4	151289000	151289449	+	450	3.89954	0
314	chr4	11191450	11191849	+	400	3.89941	0
315	chr11	54354350	54354899	+	550	3.89754	0
316	chr4	108431000	108431549	+	550	3.89614	0
317	chr8	84197600	84198799	+	1200	3.89591	0
318	chr11	111568750	111569449	+	700	3.89582	0
319	chr1	24196050	24196499	+	450	3.89582	0
320	chr10	79932750	79933149	+	400	3.89382	0
321	chr2	172675050	172675549	+	500	3.89372	0
322	chr9	110742400	110744049	+	1650	3.89158	0
323	chr4	65217750	65218349	+	600	3.89158	0
324	chr9	96770400	96770849	+	450	3.89018	0
325	chr2	152830500	152831749	+	1250	3.88937	0
326	chr5	149183700	149184799	+	1100	3.88528	0
327	chr12	112405950	112406299	+	350	3.88463	0
328	chr14	61648450	61649099	+	650	3.88201	0
329	chr17	44618150	44618949	+	800	3.87955	0
330	chr4	58670400	58671299	+	900	3.87802	0
331	chr2	91710350	91711049	+	700	3.87628	0
332	chr2	33700600	33701849	+	1250	3.87544	0
333	chr10	31445300	31445949	+	650	3.87544	0
334	chr2	170130800	170131699	+	900	3.87448	0
335	chr2	3512500	3513049	+	550	3.87257	0
336	chr16	10411750	10412349	+	600	3.86561	0
337	chr4	124972300	124972699	+	400	3.8643	0
338	chr13	60176950	60177999	+	1050	3.86376	0
339	chr6	27812450	27813049	+	600	3.86295	0
340	chr4	72204200	72205149	+	950	3.86105	0
341	chr11	94928900	94929449	+	550	3.85966	0
342	chr11	8624050	8625299	+	1250	3.85966	0
343	chr8	105966900	105967449	+	550	3.85837	0
344	chr3	49757350	49757949	+	600	3.85837	0
345	chr1	133237700	133238049	+	350	3.85754	0
346	chr17	47990000	47990599	+	600	3.8561	0
347	chr4	148804050	148804649	+	600	3.85448	0
348	chr9	114564150	114565099	+	950	3.85291	0
349	chr11	21370350	21371549	+	1200	3.85249	0
350	chr6	84191550	84192199	+	650	3.85227	0
351	chr3	52101700	52103199	+	1500	3.84997	0
352	chr1	132945900	132946249	+	350	3.84962	0
353	chr9	37029850	37030999	+	1150	3.84942	0
354	chr12	59066300	59066899	+	600	3.84937	0
355	chr8	26833350	26833749	+	400	3.84858	0
356	chr1	132476950	132477799	+	850	3.84782	0
357	chr6	52225950	52227049	+	1100	3.84633	0
358	chr9	32409450	32410049	+	600	3.84389	0
359	chr2	74704050	74705149	+	1100	3.84376	0
360	chr2	154466000	154466499	+	500	3.8437	0
361	chr1	60409300	60410199	+	900	3.84332	0
362	chr8	4253050	4253499	+	450	3.84319	0
363	chr6	127152000	127153999	+	2000	3.84319	0
364	chr2	103797300	103798049	+	750	3.84124	0
365	chr9	60982600	60983699	+	1100	3.84111	0
366	chr4	114842500	114842949	+	450	3.83877	0
367	chr9	109832500	109832999	+	500	3.83832	0
368	chr2	137087600	137088399	+	800	3.83801	0
369	chr10	127290300	127290799	+	500	3.83349	0
370	chr11	101627350	101628399	+	1050	3.83333	0
371	chr12	44188300	44188749	+	450	3.83289	0
372	chr8	69903100	69903549	+	450	3.82981	0
373	chr4	148687900	148688449	+	550	3.82958	0
374	chr10	81320950	81321299	+	350	3.8262	0
375	chr11	78245450	78246499	+	1050	3.82564	0
376	chr4	11485500	11486299	+	800	3.82305	0
377	chr11	60139450	60140249	+	800	3.82242	0
378	chr18	36274500	36275099	+	600	3.82223	0
379	chrX	57053150	57053949	+	800	3.82128	0
380	chr9	61618450	61618899	+	450	3.82128	0
381	chr12	80113050	80113649	+	600	3.82127	0
382	chr18	35829650	35830899	+	1250	3.82086	0
383	chr3	53463100	53464099	+	1000	3.81996	0
384	chr10	62650950	62651549	+	600	3.81677	0
385	chr2	32287850	32288549	+	700	3.81636	0
386	chr11	120824600	120825199	+	600	3.81636	0
387	chr16	98107300	98107599	+	300	3.81564	0
388	chr4	106865550	106866349	+	800	3.80639	0
389	chr12	16540000	16540699	+	700	3.80303	0
390	chr1	93477950	93479249	+	1300	3.80258	0
391	chr11	102624100	102624999	+	900	3.802	0
392	chr8	122658100	122658699	+	600	3.8019	0
393	chr4	107457700	107458149	+	450	3.80004	0
394	chr8	26961350	26961749	+	400	3.7999	0
395	chr18	38601300	38601699	+	400	3.7999	0
396	chr7	30143450	30143849	+	400	3.79988	0
397	chr19	36833500	36835599	+	2100	3.79912	0
398	chr15	101097850	101098449	+	600	3.79903	0
399	chr6	94699900	94700849	+	950	3.79846	0
400	chr4	141537900	141539199	+	1300	3.79832	0
401	chr3	144570400	144570999	+	600	3.79832	0
402	chr11	75147100	75147849	+	750	3.7969	0
403	chr7	28811150	28811649	+	500	3.79519	0
404	chr2	157204000	157204799	+	800	3.79439	0
405	chr14	79390350	79390999	+	650	3.79439	0
406	chr12	8855850	8856599	+	750	3.79324	0
407	chr5	93206350	93207149	+	800	3.79166	0
408	chr18	78267400	78268099	+	700	3.78959	0
409	chr2	12182300	12182999	+	700	3.78959	0
410	chr13	54332150	54332949	+	800	3.78956	0
411	chr11	69901300	69902199	+	900	3.78955	0
412	chr13	3708850	3709649	+	800	3.78847	0
413	chr2	167542950	167543849	+	900	3.78816	0
414	chr17	46857300	46858649	+	1350	3.78766	0
415	chr8	60632300	60633299	+	1000	3.78666	0
416	chr17	46030550	46031499	+	950	3.78602	0
417	chr15	88751050	88751799	+	750	3.78551	0
418	chr4	54470100	54471399	+	1300	3.78409	0
419	chr9	44478550	44479599	+	1050	3.78338	0
420	chr6	52221700	52222699	+	1000	3.78338	0
421	chr9	20976450	20977099	+	650	3.78047	0
422	chr11	69366500	69368999	+	2500	3.77975	0
423	chr8	79029500	79030649	+	1150	3.77975	0
424	chr3	129830950	129831499	+	550	3.77694	0
425	chr6	94283450	94284349	+	900	3.77571	0
426	chr17	70849350	70850649	+	1300	3.77561	0
427	chr13	91374100	91374699	+	600	3.77518	0
428	chr8	10924300	10925299	+	1000	3.77438	0
429	chr2	30693050	30693649	+	600	3.7725	0
430	chr17	6106350	6107149	+	800	3.77231	0
431	chr10	95514450	95515149	+	700	3.77138	0
432	chr18	38804200	38804999	+	800	3.7703	0
433	chr7	133123050	133124149	+	1100	3.77028	0
434	chr9	25251750	25252699	+	950	3.7673	0
435	chr13	69534400	69535549	+	1150	3.7673	0
436	chr19	46499700	46502199	+	2500	3.76614	0
437	chr4	123750000	123750699	+	700	3.7641	0
438	chr17	66416700	66417499	+	800	3.76252	0
439	chr4	149876000	149876399	+	400	3.7615	0
440	chr9	43239800	43240499	+	700	3.76013	0
441	chr4	107460300	107461149	+	850	3.75753	0
442	chr13	53201500	53202049	+	550	3.75714	0
443	chr2	72979000	72980449	+	1450	3.75714	0
444	chr1	75521200	75521749	+	550	3.75605	0
445	chr16	30008400	30009349	+	950	3.75594	0
446	chr8	120425150	120425999	+	850	3.75591	0
447	chr12	51347900	51348499	+	600	3.75541	0
448	chr5	37338250	37338649	+	400	3.75434	0
449	chr10	81570650	81571099	+	450	3.75434	0
450	chr2	73952550	73953049	+	500	3.75426	0
451	chr11	120189600	120190299	+	700	3.75377	0
452	chr7	44815850	44816399	+	550	3.75284	0
453	chr8	102983300	102983999	+	700	3.75171	0
454	chr4	15265450	15266449	+	1000	3.7494	0
455	chr10	75211750	75212599	+	850	3.74747	0
456	chr12	54714300	54714749	+	450	3.74119	0
457	chr9	20952150	20952999	+	850	3.73896	0
458	chr8	107293000	107293799	+	800	3.73812	0
459	chr6	86849000	86849599	+	600	3.73608	0
460	chr8	122660750	122661749	+	1000	3.73478	0
461	chr13	55210900	55212299	+	1400	3.73242	0
462	chr7	101108100	101109099	+	1000	3.73241	0
463	chr10	59920350	59921049	+	700	3.7312	0
464	chr4	133756500	133757949	+	1450	3.73044	0
465	chr13	63917800	63918449	+	650	3.72977	0
466	chr5	121397750	121398349	+	600	3.72552	0
467	chr4	132421750	132422749	+	1000	3.7241	0
468	chr7	29783850	29784649	+	800	3.72392	0
469	chr17	47988650	47989549	+	900	3.72161	0
470	chr15	32447600	32448299	+	700	3.72132	0
471	chr5	142961900	142962249	+	350	3.7212	0
472	chr6	113377550	113378349	+	800	3.71974	0
473	chr1	136624600	136625499	+	900	3.71926	0
474	chr9	107716900	107717349	+	450	3.71787	0
475	chr7	100767550	100767899	+	350	3.71772	0
476	chr2	182012650	182012999	+	350	3.71742	0
477	chr8	91867000	91867399	+	400	3.71651	0
478	chr2	131491650	131492299	+	650	3.71623	0
479	chr13	57945300	57945649	+	350	3.71581	0
480	chr10	117710050	117710899	+	850	3.71504	0
481	chr5	145167050	145167399	+	350	3.71426	0
482	chr2	172933350	172934649	+	1300	3.71426	0
483	chr11	108920150	108921999	+	1850	3.71401	0
484	chr9	61372250	61372949	+	700	3.71351	0
485	chr7	16890950	16891549	+	600	3.71231	0
486	chr14	69661100	69661849	+	750	3.71026	0
487	chr3	99665600	99666499	+	900	3.70989	0
488	chr2	163658150	163658549	+	400	3.70981	0
489	chr4	129696300	129696949	+	650	3.70969	0
490	chr8	25256400	25257299	+	900	3.70936	0
491	chr2	152414550	152415099	+	550	3.70845	0
492	chr13	31853400	31854349	+	950	3.70844	0
493	chr13	30484450	30485049	+	600	3.70842	0
494	chr14	70470950	70471749	+	800	3.70821	0
495	chr1	36588350	36589149	+	800	3.70821	0
496	chr14	64440400	64441149	+	750	3.70585	0
497	chr7	108797350	108797999	+	650	3.70532	0
498	chr11	60896050	60896449	+	400	3.70429	0
499	chr10	45893900	45894299	+	400	3.70042	0
500	chr1	182145500	182146149	+	650	3.70042	0
501	chr18	75366700	75368499	+	1800	3.70042	0
502	chr6	4748600	4749499	+	900	3.69827	0
503	chr14	106373600	106374049	+	450	3.69827	0
504	chr4	117658700	117659499	+	800	3.6975	0
505	chr2	131482550	131482899	+	350	3.6975	0
506	chr11	3963600	3963999	+	400	3.6975	0
507	chr8	70865500	70865999	+	500	3.6972	0
508	chr6	48444050	48444899	+	850	3.69608	0
509	chr3	89337300	89338299	+	1000	3.69608	0
510	chr16	94370350	94371649	+	1300	3.69536	0
511	chr17	29397900	29398599	+	700	3.69534	0
512	chr9	41935700	41936499	+	800	3.69421	0
513	chr3	51341200	51341749	+	550	3.69014	0
514	chr17	25941550	25942099	+	550	3.68768	0
515	chr11	95384500	95385249	+	750	3.68737	0
516	chr12	73525250	73525999	+	750	3.68632	0
517	chr4	150913900	150914799	+	900	3.68553	0
518	chr9	40455800	40456749	+	950	3.68515	0
519	chr18	43368250	43368799	+	550	3.6835	0
520	chr19	16132450	16132949	+	500	3.68317	0
521	chr7	112826150	112826749	+	600	3.68273	0
522	chr17	63863700	63864049	+	350	3.68204	0
523	chr14	25457350	25457849	+	500	3.67964	0
524	chr14	30951200	30951699	+	500	3.6771	0
525	chr5	128599850	128600699	+	850	3.67677	0
526	chr9	64022650	64023249	+	600	3.67482	0
527	chr1	185731100	185731499	+	400	3.67417	0
528	chr5	122372100	122372599	+	500	3.67415	0
529	chr11	54866100	54867049	+	950	3.67403	0
530	chr5	136403550	136403999	+	450	3.6734	0
531	chr4	128899050	128899849	+	800	3.67176	0
532	chr2	92434000	92434749	+	750	3.67135	0
533	chr16	20717600	20718149	+	550	3.67135	0
534	chr19	47919250	47919899	+	650	3.67103	0
535	chr2	93176800	93177549	+	750	3.67069	0
536	chr11	119145100	119145449	+	350	3.66295	0
537	chr8	126826050	126826899	+	850	3.66251	0
538	chr7	142548750	142549149	+	400	3.66167	0
539	chr7	25249200	25250299	+	1100	3.66162	0
540	chr4	142038000	142038299	+	300	3.66162	0
541	chr18	35887550	35889049	+	1500	3.66162	0
542	chr4	152533000	152533299	+	300	3.66051	0
543	chr9	44920550	44921449	+	900	3.65967	0
544	chr7	100784450	100785299	+	850	3.65967	0
545	chr2	80447800	80448749	+	950	3.6591	0
546	chr5	25498900	25499799	+	900	3.65823	0
547	chr10	125921900	125922499	+	600	3.65765	0
548	chr13	32033950	32034649	+	700	3.65675	0
549	chr13	73833750	73834199	+	450	3.65604	0
550	chr2	52741950	52742499	+	550	3.65511	0
551	chr8	23256950	23257399	+	450	3.65494	0
552	chr2	129800200	129801949	+	1750	3.65494	0
553	chr2	157566100	157566799	+	700	3.65416	0
554	chr15	77970350	77971149	+	800	3.6524	0
555	chr7	45053250	45053749	+	500	3.65224	0
556	chr2	60785900	60786949	+	1050	3.65182	0
557	chr17	47629500	47629949	+	450	3.65182	0
558	chr7	144940950	144942349	+	1400	3.65057	0
559	chr19	3642450	3643299	+	850	3.65035	0
560	chr16	95469700	95470299	+	600	3.65035	0
561	chr11	102317650	102318349	+	700	3.65031	0
562	chr4	124708750	124709299	+	550	3.64985	0
563	chr16	18248600	18248999	+	400	3.64911	0
564	chr11	69921300	69921949	+	650	3.64899	0
565	chr14	60251150	60251699	+	550	3.64771	0
566	chrX	12150400	12150799	+	400	3.64725	0
567	chr8	88454000	88454399	+	400	3.64725	0
568	chr4	150909500	150910199	+	700	3.64725	0
569	chr6	100053150	100053799	+	650	3.64555	0
570	chr15	76214550	76214999	+	450	3.64555	0
571	chr18	67774450	67775749	+	1300	3.64492	0
572	chr5	123057750	123058399	+	650	3.64472	0
573	chr8	72548000	72548599	+	600	3.6439	0
574	chr11	102603900	102605099	+	1200	3.64223	0
575	chr4	141139500	141139849	+	350	3.64136	0
576	chr11	115708550	115708899	+	350	3.64136	0
577	chr7	6799150	6799649	+	500	3.6404	0
578	chr1	86064200	86064599	+	400	3.63798	0
579	chr5	115326950	115327399	+	450	3.63793	0
580	chr8	125012650	125013199	+	550	3.6379	0
581	chr5	127323900	127324499	+	600	3.6379	0
582	chr4	13787800	13788399	+	600	3.6379	0
583	chr3	22075750	22077349	+	1600	3.6374	0
584	chr18	15063000	15063899	+	900	3.63676	0
585	chr6	113795300	113795649	+	350	3.63613	0
586	chr3	101161350	101161899	+	550	3.63497	0
587	chr4	125084900	125085249	+	350	3.63386	0
588	chr12	13066450	13067449	+	1000	3.63268	0
589	chr16	97962100	97962449	+	350	3.63209	0
590	chr14	46718400	46718999	+	600	3.63199	0
591	chr18	69613600	69614749	+	1150	3.62459	0
592	chr4	136150700	136151299	+	600	3.62304	0
593	chr11	8656700	8657149	+	450	3.6214	0
594	chr14	73142950	73143699	+	750	3.6206	0
595	chr7	16815300	16816499	+	1200	3.61695	0
596	chr18	58659350	58660349	+	1000	3.61695	0
597	chr12	12588750	12589399	+	650	3.61647	0
598	chr11	113785200	113786099	+	900	3.61647	0
599	chr13	60409600	60410449	+	850	3.61319	0
600	chr7	144939700	144940799	+	1100	3.61241	0
601	chr12	12940900	12943449	+	2550	3.61241	0
602	chr11	99055250	99056149	+	900	3.61189	0
603	chr2	121271050	121271699	+	650	3.60971	0
604	chr15	103014350	103015049	+	700	3.60816	0
605	chr2	174329550	174330199	+	650	3.60806	0
606	chr9	67043650	67044149	+	500	3.60683	0
607	chr13	31806200	31806949	+	750	3.60526	0
608	chr1	58826300	58826699	+	400	3.60526	0
609	chr5	123076050	123076699	+	650	3.60513	0
610	chr8	84722650	84722999	+	350	3.60299	0
611	chr9	41950950	41951699	+	750	3.60236	0
612	chr7	142552400	142553749	+	1350	3.60236	0
613	chr5	130938100	130939449	+	1350	3.60219	0
614	chr16	9355050	9355399	+	350	3.60148	0
615	chr7	96532200	96532899	+	700	3.60074	0
616	chr5	118057350	118057999	+	650	3.60039	0
617	chr10	111539650	111540049	+	400	3.59932	0
618	chr11	35655900	35656299	+	400	3.59708	0
619	chr11	88067950	88068899	+	950	3.59654	0
620	chr8	27085400	27085949	+	550	3.59613	0
621	chr13	69611750	69612049	+	300	3.59529	0
622	chr11	72606950	72608749	+	1800	3.5952	0
623	chr1	125560350	125561199	+	850	3.59374	0
624	chr2	30719050	30719349	+	300	3.59174	0
625	chr8	89042300	89044649	+	2350	3.59092	0
626	chr11	70653500	70655699	+	2200	3.59092	0
627	chr9	72661950	72662599	+	650	3.58866	0
628	chr7	127875450	127876399	+	950	3.58788	0
629	chr3	9607650	9608149	+	500	3.58627	0
630	chr1	156938600	156939799	+	1200	3.58627	0
631	chr9	60793950	60794649	+	700	3.58617	0
632	chr2	133635450	133635899	+	450	3.58617	0
633	chr14	54926300	54927249	+	950	3.58617	0
634	chr9	21615600	21616849	+	1250	3.58599	0
635	chr5	28316750	28317549	+	800	3.58599	0
636	chr15	86429600	86430449	+	850	3.58599	0
637	chr5	134313150	134315849	+	2700	3.5802	0
638	chr8	90861750	90862499	+	750	3.57975	0
639	chr3	27710200	27711399	+	1200	3.57893	0
640	chr10	120872050	120872799	+	750	3.57893	0
641	chr5	30172000	30172649	+	650	3.57705	0
642	chr12	31265650	31266149	+	500	3.57561	0
643	chr3	103809150	103809749	+	600	3.57534	0
644	chr15	81859750	81860349	+	600	3.57534	0
645	chr9	61369250	61370449	+	1200	3.5753	0
646	chr12	13214750	13215149	+	400	3.5753	0
647	chr5	137045950	137046349	+	400	3.57479	0
648	chr5	123748950	123749999	+	1050	3.57479	0
649	chr2	140668350	140668799	+	450	3.57241	0
650	chr17	56326100	56326799	+	700	3.57241	0
651	chr11	5261550	5261999	+	450	3.57241	0
652	chr12	110157600	110158449	+	850	3.57123	0
653	chr10	127667550	127668399	+	850	3.57095	0
654	chr11	120216750	120217299	+	550	3.5687	0
655	chr13	55536350	55536749	+	400	3.56818	0
656	chr9	110304400	110305549	+	1150	3.56744	0
657	chr2	102820100	102820699	+	600	3.56613	0
658	chr14	49121600	49122199	+	600	3.56585	0
659	chr6	86526100	86527349	+	1250	3.56536	0
660	chr5	143527550	143528399	+	850	3.56536	0
661	chr3	88531150	88531849	+	700	3.56494	0
662	chr5	144767850	144768849	+	1000	3.56489	0
663	chr6	71543600	71544599	+	1000	3.56394	0
664	chr16	57121100	57121949	+	850	3.5633	0
665	chr5	90366050	90366949	+	900	3.56278	0
666	chr15	83555500	83555999	+	500	3.56249	0
667	chr15	27630650	27631049	+	400	3.5623	0
668	chr4	52438750	52439399	+	650	3.56206	0
669	chr7	105777950	105778699	+	750	3.56146	0
670	chr6	136468400	136468899	+	500	3.56025	0
671	chr4	151604450	151605299	+	850	3.55885	0
672	chr16	93603600	93604399	+	800	3.55665	0
673	chr4	62525050	62525449	+	400	3.5557	0
674	chr2	92184200	92185599	+	1400	3.55491	0
675	chr15	75841700	75842349	+	650	3.55422	0
676	chr17	84187950	84188649	+	700	3.55255	0
677	chr7	98702850	98703599	+	750	3.55218	0
678	chr15	73731850	73732899	+	1050	3.55067	0
679	chr3	101395350	101395799	+	450	3.54986	0
680	chr11	34833300	34833649	+	350	3.54925	0
681	chr2	27121950	27122599	+	650	3.54902	0
682	chr10	125970500	125971049	+	550	3.54888	0
683	chr4	83021100	83021599	+	500	3.54859	0
684	chr2	157801200	157801699	+	500	3.54835	0
685	chr8	108027500	108028649	+	1150	3.54812	0
686	chr16	32315250	32315749	+	500	3.54812	0
687	chr7	142533100	142533699	+	600	3.54641	0
688	chr10	30327650	30328249	+	600	3.5451	0
689	chr5	137610500	137611449	+	950	3.54507	0
690	chr18	58210000	58211099	+	1100	3.54507	0
691	chr10	23787150	23787599	+	450	3.54445	0
692	chr9	57520950	57521399	+	450	3.54398	0
693	chr2	172727900	172728949	+	1050	3.54297	0
694	chr6	136470750	136471449	+	700	3.53818	0
695	chr15	81399750	81400449	+	700	3.53818	0
696	chr10	80039300	80039999	+	700	3.53636	0
697	chr6	83455950	83456899	+	950	3.53568	0
698	chr9	106456900	106457399	+	500	3.5353	0
699	chr18	15149750	15150849	+	1100	3.5351	0
700	chr7	46795700	46796299	+	600	3.53404	0
701	chr11	117265900	117266449	+	550	3.53261	0
702	chr3	81034400	81035049	+	650	3.53006	0
703	chr11	88047200	88047799	+	600	3.53006	0
704	chr6	89345000	89345399	+	400	3.52929	0
705	chr8	87831250	87832099	+	850	3.52733	0
706	chr4	145066900	145067249	+	350	3.52481	0
707	chr7	126976050	126976449	+	400	3.52303	0
708	chr18	44661650	44662549	+	900	3.52264	0
709	chr3	88620850	88621299	+	450	3.52249	0
710	chr14	76414400	76414999	+	600	3.52249	0
711	chr18	36281100	36281599	+	500	3.52171	0
712	chr4	98923300	98924249	+	950	3.52145	0
713	chr12	69371550	69372599	+	1050	3.52145	0
714	chr11	70562450	70563049	+	600	3.52145	0
715	chr4	148130550	148131299	+	750	3.52037	0
716	chr13	32611400	32612299	+	900	3.52037	0
717	chr9	96980650	96981199	+	550	3.51836	0
718	chr10	67003150	67004999	+	1850	3.51808	0
719	chr8	46551700	46552099	+	400	3.5179	0
720	chr3	114030050	114030899	+	850	3.5179	0
721	chr16	20516800	20517149	+	350	3.5179	0
722	chr11	70655850	70657049	+	1200	3.51691	0
723	chr11	45514450	45514899	+	450	3.51593	0
724	chr2	154454550	154455049	+	500	3.51473	0
725	chr12	105455300	105455699	+	400	3.51237	0
726	chr12	37426800	37427399	+	600	3.51234	0
727	chr11	45550300	45551049	+	750	3.51234	0
728	chr1	119053150	119054399	+	1250	3.51134	0
729	chr2	119288500	119288799	+	300	3.51089	0
730	chr7	145179550	145180249	+	700	3.51027	0
731	chr18	35831100	35832249	+	1150	3.50975	0
732	chr1	193173050	193173699	+	650	3.50956	0
733	chr7	45896750	45897099	+	350	3.50955	0
734	chr1	192137650	192138449	+	800	3.50955	0
735	chr5	99728700	99729149	+	450	3.50885	0
736	chr15	56694200	56695399	+	1200	3.50865	0
737	chr13	99413550	99414899	+	1350	3.50865	0
738	chr11	98925450	98926149	+	700	3.50744	0
739	chr17	25785400	25785699	+	300	3.50624	0
740	chr6	54594850	54595599	+	750	3.50595	0
741	chr8	77711500	77712049	+	550	3.50553	0
742	chr3	66422500	66422999	+	500	3.50553	0
743	chr11	76430000	76430499	+	500	3.50472	0
744	chr2	167595550	167596549	+	1000	3.50447	0
745	chr9	61689600	61690349	+	750	3.50253	0
746	chr1	171150100	171150599	+	500	3.5013	0
747	chr3	95357050	95357449	+	400	3.50094	0
748	chr2	156840650	156841249	+	600	3.50094	0
749	chr11	97799900	97800799	+	900	3.49874	0
750	chr11	69560100	69561699	+	1600	3.49718	0
751	chr7	100159150	100159849	+	700	3.49703	0
752	chr14	65343800	65344299	+	500	3.49703	0
753	chr10	80754800	80755349	+	550	3.49703	0
754	chr19	53653950	53654449	+	500	3.4956	0
755	chr7	110614700	110615099	+	400	3.49513	0
756	chr6	72235050	72236149	+	1100	3.49499	0
757	chr11	51543400	51543949	+	550	3.49444	0
758	chr11	88180900	88181499	+	600	3.49315	0
759	chr7	30094750	30095349	+	600	3.49295	0
760	chr8	124021300	124021699	+	400	3.48945	0
761	chr2	172888100	172888499	+	400	3.48945	0
762	chr14	24262850	24263199	+	350	3.48873	0
763	chr17	17624400	17625599	+	1200	3.48822	0
764	chr5	129501050	129501499	+	450	3.4874	0
765	chr2	26902700	26903199	+	500	3.48446	0
766	chr8	46163200	46163849	+	650	3.48262	0
767	chr3	132683800	132684249	+	450	3.48186	0
768	chr11	69800250	69801299	+	1050	3.48171	0
769	chr10	86294950	86296249	+	1300	3.48149	0
770	chr18	78756250	78756799	+	550	3.48046	0
771	chr17	47924150	47925249	+	1100	3.48046	0
772	chr4	65604950	65605299	+	350	3.48014	0
773	chr2	35621400	35622099	+	700	3.48014	0
774	chr5	138170850	138171299	+	450	3.4792	0
775	chr2	152114450	152114899	+	450	3.47869	0
776	chr8	47713850	47714849	+	1000	3.47826	0
777	chr7	16400700	16401599	+	900	3.47716	0
778	chr4	129742100	129742749	+	650	3.47589	0
779	chr11	120114700	120115199	+	500	3.47431	0
780	chr3	138526500	138528199	+	1700	3.47238	0
781	chr11	113683900	113684699	+	800	3.47115	0
782	chr3	69044600	69045099	+	500	3.47101	0
783	chr14	21987600	21988449	+	850	3.47023	0
784	chr3	144720050	144720399	+	350	3.47019	0
785	chr2	168765050	168765899	+	850	3.46942	0
786	chr19	55815050	55816199	+	1150	3.46942	0
787	chr4	154636200	154637649	+	1450	3.46933	0
788	chr9	21846750	21847449	+	700	3.4688	0
789	chr4	126147600	126147849	+	250	3.4688	0
790	chr14	55853000	55854399	+	1400	3.4688	0
791	chr13	63171350	63171849	+	500	3.4688	0
792	chr7	6244550	6245199	+	650	3.46838	0
793	chr16	95847950	95848899	+	950	3.46838	0
794	chr6	16152750	16153049	+	300	3.46819	0
795	chr17	45736300	45736849	+	550	3.46767	0
796	chr7	73125700	73126399	+	700	3.46737	0
797	chr9	61361050	61361649	+	600	3.4671	0
798	chr18	55624100	55624599	+	500	3.46583	0
799	chr11	5444650	5445299	+	650	3.4655	0
800	chr2	30836250	30836999	+	750	3.46545	0
801	chr11	97041350	97041999	+	650	3.46545	0
802	chr10	128909500	128909999	+	500	3.46326	0
803	chr2	153346050	153346899	+	850	3.4622	0
804	chr4	58518600	58518949	+	350	3.46115	0
805	chr4	83976050	83976499	+	450	3.46113	0
806	chr3	9609850	9610299	+	450	3.4608	0
807	chr15	75940800	75941149	+	350	3.4608	0
808	chr13	37492300	37492999	+	700	3.4608	0
809	chr1	90118850	90119599	+	750	3.46072	0
810	chr15	102247000	102249699	+	2700	3.46012	0
811	chr9	44498750	44499499	+	750	3.45726	0
812	chr5	25529500	25530249	+	750	3.45594	0
813	chr9	72806700	72807699	+	1000	3.45565	0
814	chr2	93014650	93015299	+	650	3.45501	0
815	chr17	35979100	35979699	+	600	3.45501	0
816	chr17	33951200	33951649	+	450	3.45501	0
817	chr17	30004350	30004899	+	550	3.45479	0
818	chrX	77510000	77511399	+	1400	3.45468	0
819	chr5	119670500	119671399	+	900	3.45404	0
820	chr4	117391600	117392399	+	800	3.45255	0
821	chr7	66109050	66109649	+	600	3.45241	0
822	chr9	59616900	59617449	+	550	3.45208	0
823	chr4	107367650	107368149	+	500	3.45188	0
824	chr11	99071800	99072499	+	700	3.45035	0
825	chrX	77509100	77509499	+	400	3.44991	0
826	chr9	77544800	77545199	+	400	3.44904	0
827	chr12	24425000	24425349	+	350	3.44904	0
828	chr1	74386850	74387249	+	400	3.44904	0
829	chr2	180709750	180710499	+	750	3.44827	0
830	chr8	57333100	57334949	+	1850	3.44763	0
831	chr9	44880950	44881949	+	1000	3.44759	0
832	chr9	50775200	50776099	+	900	3.44752	0
833	chr15	93911050	93911549	+	500	3.44752	0
834	chr9	59656550	59657749	+	1200	3.44515	0
835	chr7	13024700	13025199	+	500	3.44489	0
836	chr13	22050600	22051199	+	600	3.44407	0
837	chr6	47651000	47651349	+	350	3.44372	0
838	chr6	71440300	71441099	+	800	3.44358	0
839	chr12	98920000	98920849	+	850	3.44358	0
840	chr11	108947400	108947999	+	600	3.44358	0
841	chr9	79793300	79793749	+	450	3.44127	0
842	chr12	25100500	25101349	+	850	3.44127	0
843	chr1	59270150	59270649	+	500	3.44127	0
844	chr7	93079650	93080349	+	700	3.44089	0
845	chr11	25104400	25104799	+	400	3.44089	0
846	chr8	105636250	105637049	+	800	3.44029	0
847	chr2	4880900	4882699	+	1800	3.44029	0
848	chr9	103365350	103366249	+	900	3.44024	0
849	chr3	122293850	122294899	+	1050	3.43941	0
850	chr12	52602850	52603849	+	1000	3.43913	0
851	chr8	25333900	25334349	+	450	3.43782	0
852	chr7	73617900	73618799	+	900	3.43782	0
853	chr11	62921200	62921749	+	550	3.43742	0
854	chr9	20642150	20642699	+	550	3.43708	0
855	chr5	37893500	37894099	+	600	3.43514	0
856	chr11	60537150	60538199	+	1050	3.43514	0
857	chr4	139747050	139747399	+	350	3.43276	0
858	chr16	5255750	5256499	+	750	3.43231	0
859	chr1	61233900	61234449	+	550	3.43231	0
860	chr17	56759250	56759699	+	450	3.43231	0
861	chr15	96460350	96461399	+	1050	3.43231	0
862	chr9	121704750	121705149	+	400	3.4289	0
863	chr18	35889250	35890049	+	800	3.4289	0
864	chr17	34591700	34592549	+	850	3.4289	0
865	chr12	76369200	76371599	+	2400	3.4289	0
866	chr6	113306450	113307299	+	850	3.42684	0
867	chr13	34724700	34725099	+	400	3.42662	0
868	chr1	75124600	75125249	+	650	3.42662	0
869	chr4	33923900	33924999	+	1100	3.42583	0
870	chr8	125099750	125100249	+	500	3.4256	0
871	chr19	29251350	29251949	+	600	3.4256	0
872	chr7	24507000	24507799	+	800	3.42492	0
873	chr2	93625100	93625449	+	350	3.42492	0
874	chr18	80535700	80536149	+	450	3.42448	0
875	chr4	136163400	136163749	+	350	3.42414	0
876	chr4	74251700	74252249	+	550	3.42414	0
877	chr2	173276450	173276749	+	300	3.42414	0
878	chr1	43827850	43828249	+	400	3.42279	0
879	chr9	47286850	47287249	+	400	3.42257	0
880	chr19	7482750	7483499	+	750	3.42257	0
881	chr17	88065900	88066599	+	700	3.42257	0
882	chr11	117848750	117849349	+	600	3.42257	0
883	chr15	76523150	76523499	+	350	3.42225	0
884	chr5	30921350	30921699	+	350	3.42211	0
885	chr9	35529700	35530249	+	550	3.42149	0
886	chr5	75148000	75149149	+	1150	3.42149	0
887	chr11	100319500	100320049	+	550	3.42134	0
888	chr11	72206950	72207599	+	650	3.42077	0
889	chr3	68493850	68494799	+	950	3.42035	0
890	chr19	46075700	46076049	+	350	3.42035	0
891	chr11	117963450	117963899	+	450	3.42035	0
892	chr13	94608250	94608749	+	500	3.41978	0
893	chr2	70509100	70509549	+	450	3.4195	0
894	chr15	103182300	103182699	+	400	3.4195	0
895	chr1	125435650	125436049	+	400	3.41892	0
896	chr1	161402950	161403399	+	450	3.4182	0
897	chr13	43930100	43930699	+	600	3.41702	0
898	chr5	147429850	147430799	+	950	3.41632	0
899	chr5	76951350	76951799	+	450	3.41632	0
900	chr2	131401650	131402649	+	1000	3.41632	0
901	chr1	38760350	38760849	+	500	3.41632	0
902	chr8	104022650	104023449	+	800	3.41622	0
903	chr14	58987650	58988149	+	500	3.41579	0
904	chr2	104815900	104817249	+	1350	3.41518	0
905	chr14	19986950	19987399	+	450	3.41518	0
906	chr11	69980200	69981149	+	950	3.41484	0
907	chr3	88141850	88142799	+	950	3.4125	0
908	chr17	70850900	70853649	+	2750	3.4125	0
909	chr4	150580900	150581299	+	400	3.41198	0
910	chr11	44470400	44470799	+	400	3.41181	0
911	chr6	29718650	29719649	+	1000	3.41108	0
912	chr12	108835950	108836449	+	500	3.4109	0
913	chr16	18555050	18555699	+	650	3.41015	0
914	chr18	80628800	80629299	+	500	3.4094	0
915	chr5	117287300	117287899	+	600	3.40883	0
916	chr3	95819300	95819699	+	400	3.40883	0
917	chr15	51877450	51878099	+	650	3.40786	0
918	chr2	157464800	157465149	+	350	3.40761	0
919	chr17	83938550	83939049	+	500	3.40715	0
920	chr11	115564050	115564799	+	750	3.40696	0
921	chr11	60114750	60115599	+	850	3.40523	0
922	chr2	171734150	171735649	+	1500	3.40351	0
923	chr18	67933050	67933499	+	450	3.40351	0
924	chr18	35919400	35920749	+	1350	3.40351	0
925	chr14	122474050	122475399	+	1350	3.40322	0
926	chr14	46604850	46605699	+	850	3.40322	0
927	chr15	9070850	9071899	+	1050	3.40299	0
928	chr11	51410750	51411249	+	500	3.39997	0
929	chr10	44409100	44409499	+	400	3.39997	0
930	chr5	149320400	149321149	+	750	3.39961	0
931	chr2	166180000	166180749	+	750	3.39884	0
932	chr11	115419950	115420449	+	500	3.39882	0
933	chr1	38757700	38758549	+	850	3.39861	0
934	chr10	126978300	126979999	+	1700	3.39803	0
935	chr13	35702400	35702799	+	400	3.39788	0
936	chr4	148871700	148872549	+	850	3.39776	0
937	chr4	32238250	32239849	+	1600	3.39776	0
938	chr1	38129600	38130149	+	550	3.39776	0
939	chr15	89075750	89076149	+	400	3.39763	0
940	chr16	95794200	95794899	+	700	3.39682	0
941	chr12	80022550	80023049	+	500	3.39594	0
942	chr6	120665550	120666649	+	1100	3.39566	0
943	chr12	57230200	57230799	+	600	3.39566	0
944	chr7	79148950	79149299	+	350	3.3953	0
945	chr11	19630950	19631949	+	1000	3.3953	0
946	chr5	132543000	132543549	+	550	3.39431	0
947	chr2	124609650	124610699	+	1050	3.39367	0
948	chr1	36937750	36938199	+	450	3.39367	0
949	chr1	92371700	92372199	+	500	3.39325	0
950	chr7	4136650	4137449	+	800	3.39318	0
951	chr3	57847500	57847949	+	450	3.39106	0
952	chr14	27069500	27069799	+	300	3.38833	0
953	chr17	25570700	25571599	+	900	3.38823	0
954	chr19	5814100	5814349	+	250	3.38492	0
955	chr19	45782950	45783799	+	850	3.38409	0
956	chr13	63170400	63170649	+	250	3.38392	0
957	chr7	19320000	19320299	+	300	3.38356	0
958	chr5	99378200	99378799	+	600	3.38348	0
959	chr4	129672600	129672999	+	400	3.38348	0
960	chr1	92397550	92398149	+	600	3.38348	0
961	chr3	148052550	148053049	+	500	3.38342	0
962	chr2	106795900	106796699	+	800	3.38342	0
963	chr16	30064600	30065399	+	800	3.38323	0
964	chr9	87824650	87825249	+	600	3.38295	0
965	chr17	46890000	46890749	+	750	3.38295	0
966	chr4	154390150	154390699	+	550	3.38276	0
967	chr16	44615750	44616249	+	500	3.38182	0
968	chr6	84197650	84198149	+	500	3.38151	0
969	chr5	93093000	93093499	+	500	3.38151	0
970	chr16	45844050	45844849	+	800	3.38151	0
971	chr17	5189600	5190199	+	600	3.38095	0
972	chr4	136143300	136143799	+	500	3.37869	0
973	chr15	10540150	10540799	+	650	3.37869	0
974	chr6	101377400	101378599	+	1200	3.37775	0
975	chr5	113993350	113994099	+	750	3.37719	0
976	chr17	62883000	62883699	+	700	3.37719	0
977	chr1	162216850	162217749	+	900	3.37527	0
978	chr9	110746150	110746649	+	500	3.37412	0
979	chr19	14890300	14891149	+	850	3.37412	0
980	chr11	94327750	94328899	+	1150	3.37412	0
981	chr1	133941500	133941949	+	450	3.37412	0
982	chr9	107630500	107630899	+	400	3.37351	0
983	chr9	50726950	50727699	+	750	3.37297	0
984	chr8	70504200	70504799	+	600	3.37224	0
985	chr4	126967350	126968399	+	1050	3.37124	0
986	chr3	96327800	96329049	+	1250	3.37124	0
987	chr2	46201700	46202199	+	500	3.37043	0
988	chr15	74156100	74156849	+	750	3.37043	0
989	chr14	28972450	28973399	+	950	3.37043	0
990	chr18	35661900	35662299	+	400	3.37032	0
991	chr2	59599700	59600449	+	750	3.36879	0
992	chr14	46941500	46942149	+	650	3.36769	0
993	chr11	120186650	120188449	+	1800	3.36769	0
994	chr7	127776550	127777499	+	950	3.36745	0
995	chr2	85036900	85037649	+	750	3.36745	0
996	chr14	102982700	102983399	+	700	3.36745	0
997	chr9	48822500	48823299	+	800	3.36701	0
998	chr5	3405150	3405799	+	650	3.36442	0
999	chr5	127239700	127240299	+	600	3.36222	0
1000	chr17	23695650	23696149	+	500	3.36222	0
1001	chr12	13184450	13185199	+	750	3.36199	0
1002	chr2	27515000	27515399	+	400	3.36147	0
1003	chr18	54721550	54721849	+	300	3.36147	0
1004	chr5	132541750	132542799	+	1050	3.36121	0
1005	chrX	99217950	99218649	+	700	3.36084	0
1006	chr11	97660100	97660649	+	550	3.36072	0
1007	chr7	100121300	100121699	+	400	3.35815	0
1008	chr10	63429750	63430299	+	550	3.35815	0
1009	chr13	72638150	72638649	+	500	3.35739	0
1010	chr15	12515300	12515799	+	500	3.35553	0
1011	chr16	32332100	32332599	+	500	3.35404	0
1012	chr11	113750400	113750849	+	450	3.35387	0
1013	chr15	36793750	36794649	+	900	3.3538	0
1014	chr5	24445050	24445399	+	350	3.35331	0
1015	chr4	58631250	58632099	+	850	3.35331	0
1016	chr8	94857350	94857699	+	350	3.3533	0
1017	chr9	41890050	41891099	+	1050	3.35181	0
1018	chr8	89541300	89541749	+	450	3.35033	0
1019	chr2	128713450	128713999	+	550	3.35033	0
1020	chr14	24900650	24901299	+	650	3.35032	0
1021	chr19	6057550	6058049	+	500	3.34987	0
1022	chr1	161983950	161984849	+	900	3.34959	0
1023	chr16	17921800	17922149	+	350	3.34925	0
1024	chr13	51279750	51280699	+	950	3.34925	0
1025	chr1	157048000	157048799	+	800	3.34925	0
1026	chr5	111416700	111417399	+	700	3.34881	0
1027	chr15	94403850	94404749	+	900	3.34881	0
1028	chr9	57807300	57807599	+	300	3.34856	0
1029	chr11	94881800	94882249	+	450	3.34856	0
1030	chr11	69417400	69418149	+	750	3.34856	0
1031	chr7	109959900	109960749	+	850	3.34789	0
1032	chr4	76370000	76370349	+	350	3.34731	0
1033	chr7	133634850	133635649	+	800	3.34522	0
1034	chr17	34894250	34894599	+	350	3.34357	0
1035	chr12	10390600	10391549	+	950	3.34316	0
1036	chr17	35134800	35135499	+	700	3.34058	0
1037	chr7	89908300	89908649	+	350	3.33969	0
1038	chr19	47730700	47731549	+	850	3.33887	0
1039	chr2	172660650	172661399	+	750	3.33862	0
1040	chr8	89382600	89383099	+	500	3.33849	0
1041	chr19	47291250	47291599	+	350	3.33849	0
1042	chr15	88861900	88862699	+	800	3.33849	0
1043	chr10	127288550	127289549	+	1000	3.33849	0
1044	chr1	38631800	38632349	+	550	3.33849	0
1045	chr11	59449800	59450199	+	400	3.3384	0
1046	chr14	122200200	122200749	+	550	3.33773	0
1047	chr5	114558400	114558749	+	350	3.3376	0
1048	chr16	30190350	30190949	+	600	3.3376	0
1049	chr15	85205700	85206199	+	500	3.33685	0
1050	chr4	122996200	122997099	+	900	3.33582	0
1051	chr17	84790500	84790949	+	450	3.33582	0
1052	chr9	124423200	124423749	+	550	3.33575	0
1053	chr4	129048650	129049249	+	600	3.33575	0
1054	chr2	170547450	170547799	+	350	3.33575	0
1055	chr12	52604650	52604949	+	300	3.33575	0
1056	chr9	107872550	107873099	+	550	3.33461	0
1057	chr7	60003950	60004599	+	650	3.33352	0
1058	chr1	134060900	134061399	+	500	3.33352	0
1059	chr5	102374300	102374999	+	700	3.33124	0
1060	chr2	16486000	16486349	+	350	3.32827	0
1061	chr18	52409800	52410199	+	400	3.32805	0
1062	chr10	59323100	59323399	+	300	3.32777	0
1063	chr12	54734000	54735099	+	1100	3.32698	0
1064	chr10	80774500	80774899	+	400	3.32698	0
1065	chr9	108578250	108578949	+	700	3.32598	0
1066	chr7	79715600	79715999	+	400	3.32598	0
1067	chr3	134235750	134236799	+	1050	3.32363	0
1068	chr2	155054650	155055199	+	550	3.32363	0
1069	chr18	54404000	54404399	+	400	3.32363	0
1070	chr17	26780900	26781449	+	550	3.32363	0
1071	chr1	156718650	156719249	+	600	3.32363	0
1072	chr6	108569300	108570599	+	1300	3.32321	0
1073	chr6	47920500	47920949	+	450	3.32305	0
1074	chr1	133855400	133855949	+	550	3.32285	0
1075	chr7	5020150	5020749	+	600	3.32284	0
1076	chr13	63900950	63901999	+	1050	3.32284	0
1077	chr10	80149900	80152799	+	2900	3.32284	0
1078	chr2	26964100	26964799	+	700	3.32271	0
1079	chr16	30236250	30236599	+	350	3.32197	0
1080	chr3	98101500	98101749	+	250	3.32182	0
1081	chr2	144550550	144550949	+	400	3.32148	0
1082	chr12	100990250	100990599	+	350	3.32148	0
1083	chr5	33018400	33019099	+	700	3.32017	0
1084	chr3	89090600	89090999	+	400	3.31884	0
1085	chr3	101376600	101377299	+	700	3.31816	0
1086	chr8	87959250	87959749	+	500	3.31797	0
1087	chr17	31511850	31512549	+	700	3.31777	0
1088	chr16	94526350	94527149	+	800	3.31777	0
1089	chr13	102625200	102625649	+	450	3.31777	0
1090	chr17	56008250	56008599	+	350	3.31679	0
1091	chr19	8966850	8967249	+	400	3.31639	0
1092	chr2	44926850	44927349	+	500	3.31463	0
1093	chr11	69632600	69633299	+	700	3.31463	0
1094	chr4	142622000	142622999	+	1000	3.31419	0
1095	chr3	108911550	108912049	+	500	3.31345	0
1096	chr14	31018850	31019449	+	600	3.31345	0
1097	chr19	29806200	29806849	+	650	3.31213	0
1098	chr10	100487050	100487649	+	600	3.31075	0
1099	chr11	94246100	94246649	+	550	3.30959	0
1100	chr5	107195900	107196499	+	600	3.30943	0
1101	chr8	27023650	27024149	+	500	3.30832	0
1102	chr19	41716250	41716549	+	300	3.30805	0
1103	chr17	28691150	28692049	+	900	3.30716	0
1104	chr1	131827700	131828699	+	1000	3.30713	0
1105	chr12	27343150	27343549	+	400	3.30712	0
1106	chr15	68258600	68259099	+	500	3.30686	0
1107	chr7	101838000	101838499	+	500	3.30579	0
1108	chr18	47368750	47369649	+	900	3.30579	0
1109	chr8	105170450	105170899	+	450	3.30554	0
1110	chr7	66689450	66690049	+	600	3.30554	0
1111	chr4	102491750	102492049	+	300	3.30554	0
1112	chr18	35930400	35930999	+	600	3.30554	0
1113	chr11	69758000	69758649	+	650	3.30554	0
1114	chr8	121080550	121081799	+	1250	3.30513	0
1115	chr5	37336750	37337099	+	350	3.30473	0
1116	chr7	73606800	73607149	+	350	3.30328	0
1117	chr6	84583500	84584449	+	950	3.30328	0
1118	chr15	98871800	98872349	+	550	3.30328	0
1119	chr5	137741250	137742049	+	800	3.30273	0
1120	chr17	87107200	87107699	+	500	3.3005	0
1121	chr16	91746150	91746549	+	400	3.3005	0
1122	chr6	125803500	125803949	+	450	3.30035	0
1123	chr2	150748900	150749349	+	450	3.30024	0
1124	chr6	148831350	148831749	+	400	3.29966	0
1125	chr4	32302950	32303549	+	600	3.29966	0
1126	chr2	33705850	33706599	+	750	3.29966	0
1127	chr13	53205200	53205699	+	500	3.29966	0
1128	chr4	107341400	107341699	+	300	3.29933	0
1129	chr1	131137850	131138499	+	650	3.29933	0
1130	chr1	59762250	59762749	+	500	3.29933	0
1131	chr13	89741050	89742099	+	1050	3.29765	0
1132	chr9	32545050	32545599	+	550	3.29638	0
1133	chr9	114933700	114934249	+	550	3.29627	0
1134	chr7	136608050	136608499	+	450	3.29591	0
1135	chr6	120363850	120364549	+	700	3.2959	0
1136	chr2	125436100	125436699	+	600	3.29339	0
1137	chr4	133011400	133011849	+	450	3.29274	0
1138	chr6	52967600	52968149	+	550	3.29267	0
1139	chr2	93490600	93490799	+	200	3.29193	0
1140	chr12	110188150	110189049	+	900	3.29145	0
1141	chr11	35121100	35121899	+	800	3.29145	0
1142	chr6	95314650	95315249	+	600	3.2905	0
1143	chr15	79030100	79030949	+	850	3.2905	0
1144	chr1	56972350	56973649	+	1300	3.2905	0
1145	chr10	43578300	43579499	+	1200	3.29015	0
1146	chr2	75439550	75440149	+	600	3.28889	0
1147	chr8	120513950	120514499	+	550	3.2884	0
1148	chr4	105157050	105157699	+	650	3.2884	0
1149	chr10	80148550	80149749	+	1200	3.2884	0
1150	chr9	110476650	110476999	+	350	3.28635	0
1151	chr6	72234100	72234699	+	600	3.28635	0
1152	chr9	124424400	124425899	+	1500	3.28628	0
1153	chr19	44248150	44248599	+	450	3.28628	0
1154	chr4	105861100	105861599	+	500	3.2856	0
1155	chr4	119422450	119423049	+	600	3.28474	0
1156	chr15	51798350	51799149	+	800	3.28289	0
1157	chr9	48820900	48821399	+	500	3.28167	0
1158	chr9	41228850	41229349	+	500	3.28088	0
1159	chr17	78835400	78835649	+	250	3.2804	0
1160	chr15	94214550	94214899	+	350	3.2804	0
1161	chr5	148552450	148552999	+	550	3.27884	0
1162	chr5	113796300	113797449	+	1150	3.27884	0
1163	chr4	144892450	144893099	+	650	3.27875	0
1164	chr3	90265200	90265799	+	600	3.27875	0
1165	chr15	25773750	25774299	+	550	3.27875	0
1166	chr19	55941000	55941599	+	600	3.27792	0
1167	chr14	63131750	63132599	+	850	3.27792	0
1168	chr8	77815250	77815799	+	550	3.2771	0
1169	chr8	102784700	102785499	+	800	3.27668	0
1170	chr8	24346300	24346799	+	500	3.27668	0
1171	chr4	132260950	132261799	+	850	3.27668	0
1172	chr13	59990900	59991249	+	350	3.27633	0
1173	chr17	10319550	10320049	+	500	3.27586	0
1174	chr12	31026600	31026899	+	300	3.27586	0
1175	chr11	97150700	97151549	+	850	3.27586	0
1176	chr11	74925650	74926349	+	700	3.27586	0
1177	chr9	97018700	97019199	+	500	3.27557	0
1178	chr14	110078200	110078699	+	500	3.27557	0
1179	chr2	118901150	118901499	+	350	3.27494	0
1180	chr1	43098500	43098949	+	450	3.2742	0
1181	chr9	20878050	20878599	+	550	3.27377	0
1182	chr16	55934450	55935149	+	700	3.27377	0
1183	chr1	74391200	74392499	+	1300	3.27377	0
1184	chr3	99248450	99249249	+	800	3.27184	0
1185	chr10	120474300	120474649	+	350	3.27127	0
1186	chr1	134405800	134406199	+	400	3.26899	0
1187	chr7	141131100	141131449	+	350	3.26878	0
1188	chr1	158860200	158860699	+	500	3.26858	0
1189	chr5	75150250	75152399	+	2150	3.26806	0
1190	chr2	151921650	151921899	+	250	3.26806	0
1191	chr12	86678450	86678899	+	450	3.26806	0
1192	chr3	66985500	66986049	+	550	3.26736	0
1193	chr17	80482850	80483149	+	300	3.26736	0
1194	chr13	46727700	46728299	+	600	3.26638	0
1195	chr11	90390850	90391199	+	350	3.26638	0
1196	chr7	6837050	6837699	+	650	3.26604	0
1197	chr9	118688800	118689199	+	400	3.265	0
1198	chr7	114066550	114066949	+	400	3.265	0
1199	chr13	98503250	98505099	+	1850	3.265	0
1200	chr17	5058350	5058699	+	350	3.2649	0
1201	chr7	139364000	139364499	+	500	3.26413	0
1202	chr10	42276500	42277049	+	550	3.26413	0
1203	chr15	36609000	36609699	+	700	3.26273	0
1204	chr7	139299150	139299849	+	700	3.26244	0
1205	chr11	85875950	85876399	+	450	3.26118	0
1206	chr15	9009150	9009449	+	300	3.26118	0
1207	chr1	91844650	91845199	+	550	3.26118	0
1208	chr3	122923950	122924449	+	500	3.26111	0
1209	chr11	24077300	24078249	+	950	3.26111	0
1210	chr13	13455650	13456299	+	650	3.26096	0
1211	chr12	101083100	101083849	+	750	3.2606	0
1212	chr7	136002250	136002749	+	500	3.26055	0
1213	chr1	51758700	51759249	+	550	3.26033	0
1214	chr3	89998700	89999349	+	650	3.25995	0
1215	chr19	37907500	37907949	+	450	3.25921	0
1216	chr9	61673300	61673749	+	450	3.25884	0
1217	chr7	82715950	82716449	+	500	3.25884	0
1218	chr3	107545600	107546049	+	450	3.25884	0
1219	chr3	52104800	52105199	+	400	3.25798	0
1220	chr7	101969800	101970299	+	500	3.25481	0
1221	chr5	53590100	53590549	+	450	3.25408	0
1222	chr17	47139800	47140299	+	500	3.25408	0
1223	chr2	167081650	167082099	+	450	3.25379	0
1224	chr6	124919350	124920349	+	1000	3.25336	0
1225	chr14	24985750	24986299	+	550	3.25329	0
1226	chr4	141291500	141291849	+	350	3.25089	0
1227	chr18	15247450	15248249	+	800	3.25008	0
1228	chr14	102402350	102402699	+	350	3.25008	0
1229	chr8	57405150	57405749	+	600	3.24925	0
1230	chr12	104624000	104624599	+	600	3.24925	0
1231	chr18	67640950	67641699	+	750	3.2486	0
1232	chr8	34146350	34147299	+	950	3.24792	0
1233	chr1	172147650	172148299	+	650	3.24779	0
1234	chr3	122619450	122620149	+	700	3.24754	0
1235	chr4	135146850	135147149	+	300	3.24666	0
1236	chr10	86304650	86305049	+	400	3.24666	0
1237	chr18	55769950	55770499	+	550	3.24583	0
1238	chr12	8673850	8674549	+	700	3.24577	0
1239	chr17	65884600	65885549	+	950	3.24569	0
1240	chr11	74830100	74830549	+	450	3.24569	0
1241	chr1	183297050	183297399	+	350	3.24569	0
1242	chr2	106650150	106650499	+	350	3.24519	0
1243	chr15	78119650	78120199	+	550	3.24519	0
1244	chr5	143656850	143657299	+	450	3.24491	0
1245	chr3	51415800	51416349	+	550	3.24216	0
1246	chr6	119175050	119175499	+	450	3.24171	0
1247	chr13	54970750	54971299	+	550	3.24171	0
1248	chr10	84172850	84173349	+	500	3.24171	0
1249	chr10	7663000	7663449	+	450	3.24171	0
1250	chr18	80986200	80986749	+	550	3.24167	0
1251	chr4	109676250	109676899	+	650	3.24028	0
1252	chr5	74535300	74535749	+	450	3.23969	0
1253	chrX	48284550	48285699	+	1150	3.2391	0
1254	chr11	75630550	75631099	+	550	3.23703	0
1255	chr16	38452650	38452999	+	350	3.23649	0
1256	chr11	77215950	77216349	+	400	3.23574	0
1257	chr12	108792100	108793149	+	1050	3.23491	0
1258	chr10	63023600	63024599	+	1000	3.23464	0
1259	chr17	4907700	4908649	+	950	3.23336	0
1260	chr9	32823500	32824449	+	950	3.23325	0
1261	chr12	98746800	98747499	+	700	3.23325	0
1262	chr3	30420300	30421199	+	900	3.23254	0
1263	chr16	4558450	4560199	+	1750	3.23254	0
1264	chr10	61826500	61827349	+	850	3.2303	0
1265	chr5	142367400	142367749	+	350	3.23006	0
1266	chr17	83100750	83101199	+	450	3.22892	0
1267	chr17	34031650	34032099	+	450	3.22892	0
1268	chr19	60015850	60016399	+	550	3.22869	0
1269	chr11	120171100	120171649	+	550	3.22869	0
1270	chr5	142822600	142823849	+	1250	3.22825	0
1271	chr9	45055050	45055549	+	500	3.22803	0
1272	chr7	30534750	30535299	+	550	3.22803	0
1273	chr14	61681050	61681599	+	550	3.22795	0
1274	chr12	83631800	83632549	+	750	3.22783	0
1275	chr3	87930050	87930749	+	700	3.22743	0
1276	chr4	136144550	136145049	+	500	3.22676	0
1277	chr7	133120200	133120849	+	650	3.22652	0
1278	chr12	104822150	104822449	+	300	3.22647	0
1279	chr1	171329300	171329949	+	650	3.22647	0
1280	chr4	45453100	45453549	+	450	3.2247	0
1281	chr19	46572750	46573449	+	700	3.2247	0
1282	chr10	90904050	90904549	+	500	3.2247	0
1283	chr13	100650850	100651499	+	650	3.22447	0
1284	chr5	115340900	115341449	+	550	3.22417	0
1285	chr2	26380300	26380849	+	550	3.22234	0
1286	chr3	142881750	142882449	+	700	3.22181	0
1287	chr12	25096750	25097699	+	950	3.22111	0
1288	chr11	88161850	88162399	+	550	3.22111	0
1289	chr7	49450550	49450999	+	450	3.22044	0
1290	chr11	50377300	50377799	+	500	3.219	0
1291	chr7	96910450	96911149	+	700	3.2173	0
1292	chr17	87446050	87447149	+	1100	3.2173	0
1293	chr14	21831050	21831749	+	700	3.2173	0
1294	chr7	34764550	34765049	+	500	3.21645	0
1295	chr6	116207550	116208499	+	950	3.21565	0
1296	chr1	14184850	14185249	+	400	3.2145	0
1297	chr9	120691400	120691949	+	550	3.21372	0
1298	chr6	5807850	5808499	+	650	3.21372	0
1299	chr19	4397000	4397649	+	650	3.21317	0
1300	chr7	73391850	73392499	+	650	3.21271	0
1301	chr4	41135250	41136249	+	1000	3.21271	0
1302	chr2	164833500	164834049	+	550	3.21271	0
1303	chr14	25606450	25608499	+	2050	3.21271	0
1304	chr7	73389950	73391349	+	1400	3.21256	0
1305	chr10	60277450	60278149	+	700	3.21256	0
1306	chr3	104967650	104967899	+	250	3.21226	0
1307	chr19	17650750	17651349	+	600	3.21226	0
1308	chr17	56626850	56627499	+	650	3.21226	0
1309	chr16	10850100	10850749	+	650	3.21226	0
1310	chr6	71990000	71990299	+	300	3.21211	0
1311	chr17	83166850	83167599	+	750	3.21211	0
1312	chr13	94358600	94359049	+	450	3.2121	0
1313	chr5	107296550	107296949	+	400	3.21121	0
1314	chr4	135570050	135570549	+	500	3.21121	0
1315	chr15	81745500	81746349	+	850	3.21037	0
1316	chr2	174858400	174859649	+	1250	3.20939	0
1317	chr18	55763300	55764099	+	800	3.20939	0
1318	chr8	36688800	36689349	+	550	3.20892	0
1319	chr3	86550200	86551149	+	950	3.20892	0
1320	chr2	132846600	132847099	+	500	3.20892	0
1321	chr12	81094850	81095549	+	700	3.2085	0
1322	chr18	60670300	60670899	+	600	3.20813	0
1323	chr9	64568850	64569199	+	350	3.20732	0
1324	chr4	133967450	133968199	+	750	3.20732	0
1325	chr4	47424400	47424899	+	500	3.20681	0
1326	chr1	192834650	192835499	+	850	3.2054	0
1327	chr5	137349450	137350149	+	700	3.20497	0
1328	chr15	27779350	27780199	+	850	3.20411	0
1329	chr19	45998200	45998699	+	500	3.20346	0
1330	chr17	12751300	12751699	+	400	3.20346	0
1331	chr6	125088850	125089949	+	1100	3.2029	0
1332	chr9	57645350	57645849	+	500	3.20267	0
1333	chr9	122351400	122351849	+	450	3.202	0
1334	chr19	27429700	27430499	+	800	3.20179	0
1335	chr14	22114950	22115449	+	500	3.2017	0
1336	chr6	116337700	116338399	+	700	3.19952	0
1337	chr14	20546050	20546599	+	550	3.19932	0
1338	chr5	121452250	121452949	+	700	3.1993	0
1339	chr4	14863900	14864299	+	400	3.1993	0
1340	chr14	105572300	105572749	+	450	3.1993	0
1341	chr11	99230250	99230799	+	550	3.1993	0
1342	chr9	96478450	96478799	+	350	3.19837	0
1343	chr13	44730000	44731349	+	1350	3.19837	0
1344	chr4	106560400	106560899	+	500	3.19643	0
1345	chr4	116651250	116651999	+	750	3.19613	0
1346	chr2	154916000	154916449	+	450	3.19591	0
1347	chr10	80602750	80603099	+	350	3.19591	0
1348	chr9	62162850	62163149	+	300	3.19583	0
1349	chr1	127442950	127443449	+	500	3.19522	0
1350	chr5	121712100	121713099	+	1000	3.19498	0
1351	chr4	114779200	114780299	+	1100	3.19498	0
1352	chr2	154613250	154613699	+	450	3.19498	0
1353	chr12	32169250	32169649	+	400	3.19498	0
1354	chr8	123716100	123716449	+	350	3.19439	0
1355	chr6	124712100	124712349	+	250	3.19439	0
1356	chr17	25828700	25829199	+	500	3.19412	0
1357	chr1	170110450	170111249	+	800	3.19412	0
1358	chr1	13589800	13590049	+	250	3.19412	0
1359	chr3	80878550	80878949	+	400	3.19375	0
1360	chr12	86884350	86885449	+	1100	3.19375	0
1361	chr10	62792100	62792349	+	250	3.19375	0
1362	chr7	5060900	5061599	+	700	3.19335	0
1363	chr1	61407200	61407499	+	300	3.19335	0
1364	chr8	107436200	107436799	+	600	3.19327	0
1365	chr17	69382650	69383049	+	400	3.19327	0
1366	chr14	24779050	24779499	+	450	3.19224	0
1367	chr14	20734150	20734749	+	600	3.19164	0
1368	chr14	77874750	77875099	+	350	3.1915	0
1369	chr1	136346050	136346449	+	400	3.1915	0
1370	chr1	89070150	89070699	+	550	3.1915	0
1371	chr19	41911700	41911999	+	300	3.19094	0
1372	chr5	115168550	115169099	+	550	3.19078	0
1373	chr11	120240050	120240699	+	650	3.19032	0
1374	chr11	60114200	60114599	+	400	3.19032	0
1375	chr10	95112600	95112999	+	400	3.19032	0
1376	chr8	120505000	120506049	+	1050	3.18864	0
1377	chr3	34321100	34321349	+	250	3.18847	0
1378	chr11	98809650	98810149	+	500	3.18847	0
1379	chr2	4298250	4298649	+	400	3.18795	0
1380	chr14	105896650	105898099	+	1450	3.18774	0
1381	chr13	93966200	93966749	+	550	3.18774	0
1382	chr9	110781400	110782099	+	700	3.18735	0
1383	chr4	31354000	31354399	+	400	3.18735	0
1384	chr4	109280000	109280599	+	600	3.18721	0
1385	chr11	98794700	98795849	+	1150	3.18713	0
1386	chr15	79403050	79403299	+	250	3.18572	0
1387	chr2	30441700	30441949	+	250	3.18402	0
1388	chr18	54952300	54953049	+	750	3.18374	0
1389	chr15	82244450	82244749	+	300	3.18374	0
1390	chr2	120609300	120609649	+	350	3.18178	0
1391	chr14	65996050	65996749	+	700	3.18155	0
1392	chr2	155047400	155047649	+	250	3.18059	0
1393	chr12	3891350	3891699	+	350	3.18059	0
1394	chr11	112450250	112450549	+	300	3.18044	0
1395	chr13	78629000	78629749	+	750	3.17974	0
1396	chr2	165653550	165653849	+	300	3.17908	0
1397	chr9	40686600	40687099	+	500	3.17893	0
1398	chr2	117120650	117121149	+	500	3.17893	0
1399	chr13	46930150	46930949	+	800	3.17893	0
1400	chr12	110298600	110298949	+	350	3.17893	0
1401	chr1	179197900	179198949	+	1050	3.17893	0
1402	chr7	137298000	137298549	+	550	3.17887	0
1403	chr4	106815850	106816299	+	450	3.17887	0
1404	chr3	153912900	153913249	+	350	3.17887	0
1405	chr2	75349050	75349499	+	450	3.17887	0
1406	chr7	96652000	96652799	+	800	3.1787	0
1407	chr2	32395550	32396449	+	900	3.1787	0
1408	chr11	57827250	57827899	+	650	3.1787	0
1409	chr7	73595100	73595649	+	550	3.17776	0
1410	chr4	126150100	126150799	+	700	3.17776	0
1411	chr3	99709550	99710199	+	650	3.17776	0
1412	chr11	43528550	43529049	+	500	3.17776	0
1413	chr8	91801250	91801949	+	700	3.17751	0
1414	chr4	107139800	107140499	+	700	3.17751	0
1415	chr9	45117700	45118049	+	350	3.17743	0
1416	chr1	133742100	133742599	+	500	3.17685	0
1417	chr4	40948300	40948699	+	400	3.17586	0
1418	chr14	103346350	103347199	+	850	3.17586	0
1419	chr11	79339300	79339999	+	700	3.17586	0
1420	chr2	148326200	148326899	+	700	3.17537	0
1421	chr12	24830850	24831799	+	950	3.17525	0
1422	chr11	51533300	51534149	+	850	3.17386	0
1423	chr11	102778100	102778549	+	450	3.17329	0
1424	chr6	126166750	126167249	+	500	3.17315	0
1425	chr5	111581150	111581599	+	450	3.17298	0
1426	chr14	25123550	25124199	+	650	3.17298	0
1427	chr9	65162700	65163499	+	800	3.1725	0
1428	chr7	45395200	45395899	+	700	3.1725	0
1429	chr7	16738150	16738399	+	250	3.16964	0
1430	chr5	135689000	135689349	+	350	3.16964	0
1431	chr18	6135750	6136949	+	1200	3.16964	0
1432	chr14	22048250	22049249	+	1000	3.16964	0
1433	chr5	121711150	121711649	+	500	3.16962	0
1434	chr19	7268000	7268899	+	900	3.16962	0
1435	chr16	85129200	85129849	+	650	3.16881	0
1436	chr10	128409300	128410049	+	750	3.16881	0
1437	chr17	80887300	80887599	+	300	3.16838	0
1438	chr1	62648200	62648549	+	350	3.16821	0
1439	chr8	69973350	69974499	+	1150	3.16785	0
1440	chr8	125218750	125219199	+	450	3.16681	0
1441	chr3	144202300	144202749	+	450	3.16681	0
1442	chr2	18027500	18028949	+	1450	3.16681	0
1443	chr13	99780800	99781599	+	800	3.16681	0
1444	chr11	103697700	103697999	+	300	3.16681	0
1445	chr5	115157900	115158849	+	950	3.16529	0
1446	chr8	105965800	105966249	+	450	3.16447	0
1447	chr14	65903750	65904099	+	350	3.16431	0
1448	chr11	118998450	118998999	+	550	3.16336	0
1449	chr3	72235300	72235799	+	500	3.1632	0
1450	chr13	94976400	94976799	+	400	3.16213	0
1451	chr12	73112800	73113649	+	850	3.16213	0
1452	chr7	67372700	67373199	+	500	3.16205	0
1453	chr6	51469950	51471249	+	1300	3.16205	0
1454	chr9	35558200	35558749	+	550	3.16141	0
1455	chr3	129076350	129076799	+	450	3.16141	0
1456	chr1	93754400	93754999	+	600	3.16141	0
1457	chr7	44246200	44246749	+	550	3.16116	0
1458	chr4	130663000	130664049	+	1050	3.1604	0
1459	chr19	7417200	7418349	+	1150	3.16013	0
1460	chr10	71344650	71345149	+	500	3.15993	0
1461	chr7	16312650	16313049	+	400	3.15987	0
1462	chr5	122354150	122354599	+	450	3.15987	0
1463	chr13	100124650	100124999	+	350	3.15987	0
1464	chr11	101171650	101172249	+	600	3.15987	0
1465	chr17	56462550	56463199	+	650	3.15952	0
1466	chr8	11497300	11497749	+	450	3.15945	0
1467	chr15	38518200	38518799	+	600	3.15945	0
1468	chr1	127537450	127537799	+	350	3.15945	0
1469	chr1	106713700	106714649	+	950	3.15945	0
1470	chr1	16104950	16105749	+	800	3.15945	0
1471	chr5	145191350	145191799	+	450	3.15945	0
1472	chr13	53992950	53993499	+	550	3.15933	0
1473	chr5	44686300	44686749	+	450	3.15926	0
1474	chr9	48755650	48756099	+	450	3.15896	0
1475	chr8	120487650	120488449	+	800	3.15896	0
1476	chr4	114542100	114542499	+	400	3.15896	0
1477	chr2	170547950	170548399	+	450	3.15896	0
1478	chr11	69418650	69419049	+	400	3.15896	0
1479	chr1	4571750	4572199	+	450	3.15896	0
1480	chr3	84814300	84814649	+	350	3.15868	0
1481	chr13	84347950	84348399	+	450	3.15853	0
1482	chr5	24351500	24351849	+	350	3.15751	0
1483	chr15	12680900	12681249	+	350	3.15711	0
1484	chr9	88068900	88069499	+	600	3.15692	0
1485	chr17	28177250	28177749	+	500	3.15692	0
1486	chr11	100619550	100619999	+	450	3.15692	0
1487	chr1	152625200	152625499	+	300	3.15692	0
1488	chr14	69442950	69443649	+	700	3.15677	0
1489	chr19	41615850	41616149	+	300	3.15614	0
1490	chr8	70691950	70692399	+	450	3.15504	0
1491	chr4	40722400	40723149	+	750	3.15504	0
1492	chr9	65630100	65631649	+	1550	3.15433	0
1493	chr8	26673150	26673449	+	300	3.15433	0
1494	chr16	28929600	28930149	+	550	3.15433	0
1495	chr3	129204500	129205049	+	550	3.15275	0
1496	chr14	25022950	25023299	+	350	3.15275	0
1497	chr1	133130900	133131799	+	900	3.15275	0
1498	chr17	12318350	12319049	+	700	3.1523	0
1499	chr1	171222550	171222999	+	450	3.15119	0
1500	chr3	101328700	101329049	+	350	3.15031	0
1501	chr8	120449650	120450499	+	850	3.14973	0
1502	chrX	12135650	12136899	+	1250	3.14938	0
1503	chr17	29450750	29451899	+	1150	3.14938	0
1504	chr15	73067400	73067849	+	450	3.14938	0
1505	chr4	123717950	123718499	+	550	3.1469	0
1506	chr17	17828000	17829499	+	1500	3.14566	0
1507	chr9	32672150	32672849	+	700	3.145	0
1508	chr15	95790500	95790849	+	350	3.145	0
1509	chr11	76525850	76526349	+	500	3.145	0
1510	chr10	13967150	13967449	+	300	3.145	0
1511	chr9	72274500	72275099	+	600	3.14467	0
1512	chr10	108161850	108162649	+	800	3.14467	0
1513	chr15	102518200	102518999	+	800	3.14467	0
1514	chr8	105519350	105519649	+	300	3.1445	0
1515	chr17	28800950	28801249	+	300	3.1445	0
1516	chr16	21245900	21246899	+	1000	3.1445	0
1517	chr15	35748400	35748849	+	450	3.1445	0
1518	chr8	110846750	110847099	+	350	3.14433	0
1519	chr2	130563550	130563849	+	300	3.14433	0
1520	chrX	21433500	21433949	+	450	3.14352	0
1521	chr15	94003100	94003399	+	300	3.14352	0
1522	chr3	41082900	41083599	+	700	3.14317	0
1523	chr1	135579150	135579499	+	350	3.14317	0
1524	chr5	23502050	23502449	+	400	3.14268	0
1525	chr4	45848400	45848899	+	500	3.14152	0
1526	chr3	110142600	110144149	+	1550	3.14101	0
1527	chr3	66166750	66167399	+	650	3.14101	0
1528	chr18	35832400	35832749	+	350	3.13971	0
1529	chr17	45563950	45564299	+	350	3.13971	0
1530	chr16	74795600	74796149	+	550	3.13971	0
1531	chr11	69846300	69846599	+	300	3.13971	0
1532	chr17	83913700	83914199	+	500	3.13869	0
1533	chr14	23523850	23524399	+	550	3.13869	0
1534	chr1	183189000	183189599	+	600	3.13869	0
1535	chr3	121434150	121434549	+	400	3.13841	0
1536	chr10	41490300	41490699	+	400	3.13841	0
1537	chr7	16614550	16614899	+	350	3.138	0
1538	chr17	80480250	80480699	+	450	3.138	0
1539	chrX	12126450	12127349	+	900	3.13766	0
1540	chr7	68559650	68560049	+	400	3.13766	0
1541	chr6	145865400	145865649	+	250	3.13766	0
1542	chr9	37053900	37054649	+	750	3.135	0
1543	chr1	72255050	72255499	+	450	3.135	0
1544	chr19	55662300	55663049	+	750	3.135	0
1545	chr7	80198200	80198749	+	550	3.13413	0
1546	chr6	83794900	83795299	+	400	3.13413	0
1547	chr6	4484050	4484649	+	600	3.13413	0
1548	chr12	73052000	73052599	+	600	3.13413	0
1549	chr10	82699100	82699399	+	300	3.13413	0
1550	chr11	98937550	98937949	+	400	3.1333	0
1551	chr5	133482450	133482949	+	500	3.13305	0
1552	chr8	25343300	25343799	+	500	3.13186	0
1553	chr7	141172300	141172749	+	450	3.13111	0
1554	chr16	27358300	27358649	+	350	3.13111	0
1555	chr16	32316600	32316949	+	350	3.13065	0
1556	chr11	118239300	118239749	+	450	3.13065	0
1557	chr8	108714750	108715099	+	350	3.1294	0
1558	chr8	91713900	91714349	+	450	3.1294	0
1559	chr11	101244950	101245299	+	350	3.1294	0
1560	chr2	75209050	75209799	+	750	3.12873	0
1561	chr18	65520450	65521449	+	1000	3.12873	0
1562	chr16	20141050	20141549	+	500	3.12873	0
1563	chr8	71592000	71592449	+	450	3.12755	0
1564	chr7	98957050	98957749	+	700	3.12755	0
1565	chr18	24121500	24121899	+	400	3.12755	0
1566	chr11	100414500	100415249	+	750	3.12755	0
1567	chr15	73185050	73185349	+	300	3.12746	0
1568	chr12	73111950	73112499	+	550	3.12746	0
1569	chr2	148680800	148681149	+	350	3.12678	0
1570	chr9	44417850	44418249	+	400	3.12652	0
1571	chr9	32495100	32495499	+	400	3.12652	0
1572	chr4	154569700	154570449	+	750	3.12652	0
1573	chr14	21679800	21680199	+	400	3.12645	0
1574	chr1	14145950	14146349	+	400	3.12517	0
1575	chr8	120838900	120839399	+	500	3.12473	0
1576	chr4	55532100	55532799	+	700	3.12473	0
1577	chr6	90737350	90737699	+	350	3.12387	0
1578	chr13	103027400	103028199	+	800	3.12387	0
1579	chr11	120824250	120824549	+	300	3.12353	0
1580	chr9	41950400	41950899	+	500	3.1227	0
1581	chr5	118560000	118560499	+	500	3.1227	0
1582	chr15	102406500	102406949	+	450	3.1227	0
1583	chr11	88240650	88241249	+	600	3.1227	0
1584	chr7	27591300	27592149	+	850	3.12208	0
1585	chr4	131918400	131919449	+	1050	3.12208	0
1586	chr4	107253550	107253899	+	350	3.12208	0
1587	chr2	154465100	154465499	+	400	3.12208	0
1588	chr2	65993300	65993649	+	350	3.12089	0
1589	chr5	121545800	121546099	+	300	3.12014	0
1590	chr2	115868950	115869949	+	1000	3.1199	0
1591	chr11	101641750	101642199	+	450	3.11936	0
1592	chr10	71347200	71348049	+	850	3.11936	0
1593	chr18	38583900	38584749	+	850	3.11882	0
1594	chr6	50986350	50986949	+	600	3.11856	0
1595	chr17	28952300	28952799	+	500	3.11856	0
1596	chr14	25718600	25718899	+	300	3.11856	0
1597	chr9	7836900	7837399	+	500	3.11727	0
1598	chr4	82506150	82507099	+	950	3.11727	0
1599	chr10	88730850	88731699	+	850	3.1172	0
1600	chr9	106885300	106886249	+	950	3.11549	0
1601	chr11	105181550	105181949	+	400	3.1152	0
1602	chr6	39256400	39256799	+	400	3.11514	0
1603	chr1	187676600	187677149	+	550	3.11514	0
1604	chr6	83914350	83914649	+	300	3.11416	0
1605	chr3	131105850	131106449	+	600	3.11416	0
1606	chr17	74316200	74316599	+	400	3.11416	0
1607	chr1	157412050	157412799	+	750	3.11416	0
1608	chr7	6172050	6172699	+	650	3.11143	0
1609	chr7	16047700	16048249	+	550	3.11002	0
1610	chr5	33692400	33692799	+	400	3.11	0
1611	chr9	107983300	107983799	+	500	3.10982	0
1612	chr8	79521950	79522499	+	550	3.10982	0
1613	chr6	67036250	67036949	+	700	3.10965	0
1614	chr19	41618050	41618399	+	350	3.10965	0
1615	chr8	120448150	120448449	+	300	3.10948	0
1616	chr2	155133250	155134099	+	850	3.10948	0
1617	chr13	43304000	43304449	+	450	3.10948	0
1618	chr11	60140550	60141049	+	500	3.10948	0
1619	chr8	91948050	91949149	+	1100	3.10919	0
1620	chr2	27886050	27886599	+	550	3.10886	0
1621	chr15	89180500	89180949	+	450	3.10886	0
1622	chr11	81982250	81982599	+	350	3.10886	0
1623	chr14	52019550	52020549	+	1000	3.10844	0
1624	chr12	3806400	3807949	+	1550	3.10844	0
1625	chr8	87199350	87200249	+	900	3.10808	0
1626	chr5	119411150	119411449	+	300	3.10808	0
1627	chr12	110695950	110696749	+	800	3.1079	0
1628	chr14	19750650	19751349	+	700	3.10739	0
1629	chr19	32388050	32389399	+	1350	3.10634	0
1630	chr14	100735350	100735799	+	450	3.10634	0
1631	chr10	67002600	67002999	+	400	3.10634	0
1632	chr8	122648500	122648849	+	350	3.10601	0
1633	chr2	74650950	74651499	+	550	3.1058	0
1634	chr15	103128100	103128499	+	400	3.1058	0
1635	chr11	101417200	101417599	+	400	3.1058	0
1636	chr10	99268450	99269349	+	900	3.1058	0
1637	chr8	18846100	18846499	+	400	3.104	0
1638	chr7	143296100	143296749	+	650	3.10367	0
1639	chr1	60097750	60098499	+	750	3.10337	0
1640	chr7	135863700	135864099	+	400	3.10264	0
1641	chr6	8209050	8209599	+	550	3.10264	0
1642	chr3	129532050	129532399	+	350	3.10264	0
1643	chr10	119131900	119132299	+	400	3.10264	0
1644	chr17	12992550	12992949	+	400	3.10264	0
1645	chr1	190928400	190928799	+	400	3.10264	0
1646	chr16	96145200	96145499	+	300	3.10141	0
1647	chr16	11175700	11176549	+	850	3.10141	0
1648	chr13	23551050	23551499	+	450	3.10141	0
1649	chr7	132815150	132815549	+	400	3.09984	0
1650	chr8	20553600	20554199	+	600	3.09924	0
1651	chr4	155223000	155223599	+	600	3.09858	0
1652	chr4	120825500	120825949	+	450	3.09858	0
1653	chr13	40417600	40418099	+	500	3.09858	0
1654	chr12	111908050	111908499	+	450	3.09858	0
1655	chr11	20741350	20741949	+	600	3.09858	0
1656	chr11	96332550	96333799	+	1250	3.09593	0
1657	chr1	136588600	136589299	+	700	3.09584	0
1658	chr17	25273050	25273949	+	900	3.09548	0
1659	chr17	25083400	25083849	+	450	3.09548	0
1660	chr16	20097900	20098349	+	450	3.09548	0
1661	chr14	7822750	7823349	+	600	3.09548	0
1662	chr12	17544450	17544949	+	500	3.09471	0
1663	chr5	134014650	134015199	+	550	3.09274	0
1664	chr8	32881500	32882049	+	550	3.09211	0
1665	chr18	35771350	35771699	+	350	3.09211	0
1666	chr11	120350250	120350649	+	400	3.09211	0
1667	chr9	106452900	106453249	+	350	3.09202	0
1668	chr11	112783650	112784099	+	450	3.09202	0
1669	chr11	60175350	60176199	+	850	3.09201	0
1670	chr1	74041600	74041949	+	350	3.09201	0
1671	chr2	178513950	178514199	+	250	3.09131	0
1672	chr17	33523950	33524499	+	550	3.09131	0
1673	chr9	110656450	110656799	+	350	3.09103	0
1674	chr8	105520950	105521449	+	500	3.09103	0
1675	chr19	34714100	34714649	+	550	3.09103	0
1676	chr7	75455300	75455649	+	350	3.09057	0
1677	chr6	29735400	29735749	+	350	3.08961	0
1678	chr2	75704400	75705049	+	650	3.08961	0
1679	chr15	17049100	17049699	+	600	3.08915	0
1680	chr6	47244250	47244499	+	250	3.08911	0
1681	chr17	88441600	88441999	+	400	3.08911	0
1682	chr8	87836650	87837199	+	550	3.089	0
1683	chr5	25222950	25223299	+	350	3.089	0
1684	chr2	172925000	172925299	+	300	3.08844	0
1685	chr2	102451400	102452099	+	700	3.08771	0
1686	chr16	46496750	46497399	+	650	3.08771	0
1687	chr14	76110750	76111049	+	300	3.08771	0
1688	chr13	107890300	107890799	+	500	3.08771	0
1689	chr11	117114850	117115149	+	300	3.08771	0
1690	chr11	69662500	69663099	+	600	3.08771	0
1691	chr6	127870150	127870749	+	600	3.08735	0
1692	chr3	38885050	38885449	+	400	3.08735	0
1693	chr11	116853100	116853699	+	600	3.08735	0
1694	chr5	24352150	24353099	+	950	3.08695	0
1695	chr9	74186650	74187399	+	750	3.08636	0
1696	chr4	150129050	150129249	+	200	3.08636	0
1697	chr18	84768800	84769149	+	350	3.08636	0
1698	chr6	52230450	52230899	+	450	3.086	0
1699	chr10	94872050	94872349	+	300	3.08585	0
1700	chr9	48836150	48836599	+	450	3.08351	0
1701	chr15	56858100	56858549	+	450	3.08351	0
1702	chr14	65358400	65358799	+	400	3.08351	0
1703	chr13	43365350	43365899	+	550	3.08351	0
1704	chr16	34920250	34920599	+	350	3.08267	0
1705	chr16	4594200	4594949	+	750	3.08267	0
1706	chr1	86441600	86442699	+	1100	3.08267	0
1707	chr4	126256000	126256649	+	650	3.08235	0
1708	chr11	94526150	94526799	+	650	3.0821	0
1709	chr11	76256200	76256499	+	300	3.08158	0
1710	chr17	47974950	47975499	+	550	3.08158	0
1711	chr12	21373450	21374199	+	750	3.08134	0
1712	chr8	15012800	15013249	+	450	3.08085	0
1713	chr6	30048000	30048649	+	650	3.08085	0
1714	chr5	77265500	77266499	+	1000	3.08085	0
1715	chr15	82899350	82900149	+	800	3.08085	0
1716	chr11	5762100	5762599	+	500	3.08085	0
1717	chr4	150569150	150569599	+	450	3.08019	0
1718	chr1	178276400	178276799	+	400	3.08019	0
1719	chr6	30543500	30544299	+	800	3.07907	0
1720	chr8	20125800	20126049	+	250	3.07853	0
1721	chr12	34200000	34200549	+	550	3.07835	0
1722	chr8	48554850	48555499	+	650	3.07804	0
1723	chr5	146794550	146795199	+	650	3.07804	0
1724	chr3	96459800	96460699	+	900	3.07804	0
1725	chr11	107547400	107548099	+	700	3.07804	0
1726	chr11	97568600	97569049	+	450	3.07687	0
1727	chr16	30020100	30020449	+	350	3.07595	0
1728	chr9	116054450	116054849	+	400	3.07471	0
1729	chr4	115057250	115057649	+	400	3.07471	0
1730	chr14	45826150	45826549	+	400	3.07471	0
1731	chr2	35504100	35504449	+	350	3.07412	0
1732	chr15	79108450	79109249	+	800	3.07412	0
1733	chr15	76368800	76369199	+	400	3.07412	0
1734	chr13	72017750	72018199	+	450	3.07412	0
1735	chr11	75263500	75264049	+	550	3.07412	0
1736	chr1	84838700	84839849	+	1150	3.07412	0
1737	chr8	123373450	123373849	+	400	3.07376	0
1738	chr4	130828950	130829599	+	650	3.07376	0
1739	chr17	32165850	32166399	+	550	3.07376	0
1740	chr10	99359550	99359949	+	400	3.07376	0
1741	chr11	6546400	6547399	+	1000	3.07369	0
1742	chr10	80561250	80561749	+	500	3.07357	0
1743	chr11	64024350	64025349	+	1000	3.07337	0
1744	chr5	3400000	3400299	+	300	3.07302	0
1745	chr3	30508050	30509699	+	1650	3.07302	0
1746	chr9	33104600	33105249	+	650	3.07248	0
1747	chr7	96533100	96533349	+	250	3.07248	0
1748	chr5	131581400	131582149	+	750	3.07248	0
1749	chr17	5723750	5724149	+	400	3.07248	0
1750	chr15	35938000	35938299	+	300	3.07248	0
1751	chr11	97661750	97662299	+	550	3.07248	0
1752	chr7	83060750	83061149	+	400	3.07247	0
1753	chr5	73782400	73783049	+	650	3.07247	0
1754	chr3	65658650	65659699	+	1050	3.07247	0
1755	chr8	121950100	121950649	+	550	3.0721	0
1756	chr8	26805200	26805649	+	450	3.0721	0
1757	chr6	88627600	88627849	+	250	3.0721	0
1758	chr4	155282700	155283699	+	1000	3.0721	0
1759	chr4	138454150	138454849	+	700	3.0721	0
1760	chr19	53310250	53310749	+	500	3.0721	0
1761	chr19	10525150	10525949	+	800	3.0721	0
1762	chr12	108002250	108003099	+	850	3.0721	0
1763	chr11	11808900	11810049	+	1150	3.0721	0
1764	chr5	74155800	74156049	+	250	3.07174	0
1765	chr4	100795500	100795899	+	400	3.07028	0
1766	chr18	61554850	61555499	+	650	3.07028	0
1767	chr17	74527800	74528499	+	700	3.07028	0
1768	chr8	120538250	120538849	+	600	3.07027	0
1769	chr13	64003200	64003499	+	300	3.07027	0
1770	chr4	133672500	133672849	+	350	3.07008	0
1771	chr1	134494400	134494899	+	500	3.07008	0
1772	chr11	119052600	119053649	+	1050	3.06971	0
1773	chr7	145206150	145206549	+	400	3.06913	0
1774	chr8	123805750	123806449	+	700	3.06872	0
1775	chr9	63959750	63960749	+	1000	3.06854	0
1776	chr14	20793750	20794599	+	850	3.06805	0
1777	chr7	126501900	126502549	+	650	3.06736	0
1778	chr7	25281900	25282899	+	1000	3.06736	0
1779	chr11	3409000	3409299	+	300	3.06736	0
1780	chr6	93912550	93913199	+	650	3.06715	0
1781	chr10	111506050	111506549	+	500	3.06715	0
1782	chr11	61929700	61930499	+	800	3.06712	0
1783	chr8	94871850	94872499	+	650	3.06639	0
1784	chr4	11190900	11191349	+	450	3.06639	0
1785	chr14	67461900	67462249	+	350	3.06639	0
1786	chr13	53309250	53310099	+	850	3.06612	0
1787	chr7	110061450	110062149	+	700	3.06593	0
1788	chr7	46639450	46639849	+	400	3.06593	0
1789	chr6	108456150	108456599	+	450	3.06593	0
1790	chr2	30604900	30605699	+	800	3.06593	0
1791	chr17	66111350	66111849	+	500	3.06593	0
1792	chr12	73521250	73522749	+	1500	3.06593	0
1793	chr11	72042150	72042599	+	450	3.06593	0
1794	chr10	43221200	43221599	+	400	3.06593	0
1795	chr4	43957450	43957799	+	350	3.06511	0
1796	chr5	110392850	110393099	+	250	3.06417	0
1797	chr17	15041400	15042149	+	750	3.06417	0
1798	chr1	31149500	31149899	+	400	3.06417	0
1799	chr11	28365350	28365799	+	450	3.06308	0
1800	chr3	105853750	105854099	+	350	3.06212	0
1801	chr18	61335850	61336299	+	450	3.06212	0
1802	chr12	37541050	37541299	+	250	3.06212	0
1803	chr12	73367550	73367999	+	450	3.06155	0
1804	chr14	28542150	28542699	+	550	3.06149	0
1805	chrX	119852450	119852849	+	400	3.06003	0
1806	chr11	33163050	33163599	+	550	3.06003	0
1807	chr10	79681600	79682249	+	650	3.06003	0
1808	chr17	14978450	14979249	+	800	3.05972	0
1809	chr8	122080450	122080799	+	350	3.05839	0
1810	chr11	117969300	117969699	+	400	3.05839	0
1811	chr10	81168750	81169149	+	400	3.05839	0
1812	chr15	83639100	83639599	+	500	3.05805	0
1813	chr9	69669550	69671149	+	1600	3.05689	0
1814	chr8	84663900	84664249	+	350	3.05689	0
1815	chr7	133709100	133709299	+	200	3.05689	0
1816	chr6	145998300	145999099	+	800	3.05689	0
1817	chr17	35121250	35121999	+	750	3.05689	0
1818	chr3	86701150	86701649	+	500	3.0568	0
1819	chr14	16554600	16555299	+	700	3.05625	0
1820	chrX	101254050	101254549	+	500	3.05578	0
1821	chr5	140102800	140103149	+	350	3.05578	0
1822	chr2	25224800	25225499	+	700	3.05578	0
1823	chr15	84216350	84216749	+	400	3.05578	0
1824	chr12	17710600	17711149	+	550	3.05578	0
1825	chr11	77216400	77216749	+	350	3.05578	0
1826	chr6	116959700	116959999	+	300	3.05568	0
1827	chr2	152707500	152707899	+	400	3.05568	0
1828	chr9	68874550	68874899	+	350	3.05494	0
1829	chr4	71131250	71132149	+	900	3.05494	0
1830	chr3	96450000	96450849	+	850	3.05494	0
1831	chr15	96699550	96700249	+	700	3.05494	0
1832	chr10	120898600	120899149	+	550	3.05494	0
1833	chr6	124740850	124741249	+	400	3.05465	0
1834	chr5	146920000	146920599	+	600	3.05465	0
1835	chr5	101659600	101659999	+	400	3.05465	0
1836	chr3	88138200	88138799	+	600	3.05465	0
1837	chr2	165195800	165196149	+	350	3.05465	0
1838	chr11	98796500	98797049	+	550	3.05465	0
1839	chr8	70488050	70489999	+	1950	3.05427	0
1840	chr8	44934850	44935249	+	400	3.05427	0
1841	chr18	37178450	37178949	+	500	3.05427	0
1842	chr6	86733150	86733599	+	450	3.05315	0
1843	chr6	83077550	83078649	+	1100	3.05315	0
1844	chr13	118714150	118714599	+	450	3.05302	0
1845	chr7	29983800	29984099	+	300	3.05267	0
1846	chr3	51739300	51739949	+	650	3.05267	0
1847	chr1	14184000	14184649	+	650	3.05267	0
1848	chr18	69865800	69866299	+	500	3.05226	0
1849	chr9	25573850	25574499	+	650	3.05204	0
1850	chr5	53320350	53320849	+	500	3.05204	0
1851	chr8	57328050	57328949	+	900	3.05168	0
1852	chr9	106453550	106453749	+	200	3.05068	0
1853	chr7	127512350	127512799	+	450	3.05068	0
1854	chr15	76710450	76710949	+	500	3.05068	0
1855	chr7	45215650	45216799	+	1150	3.05042	0
1856	chr6	127154500	127155349	+	850	3.05042	0
1857	chr13	118713650	118713949	+	300	3.05042	0
1858	chr11	73176700	73177899	+	1200	3.05042	0
1859	chr8	22859200	22859649	+	450	3.04983	0
1860	chr11	86757450	86758149	+	700	3.04983	0
1861	chr3	23409450	23409799	+	350	3.04974	0
1862	chr11	53567300	53567649	+	350	3.04974	0
1863	chr11	4849250	4849549	+	300	3.04974	0
1864	chr8	94098150	94098749	+	600	3.0485	0
1865	chr17	55367100	55367499	+	400	3.04772	0
1866	chr15	37053150	37053599	+	450	3.04772	0
1867	chr15	89356300	89356699	+	400	3.04673	0
1868	chr14	61439800	61440249	+	450	3.04673	0
1869	chr8	113804100	113804649	+	550	3.04585	0
1870	chr6	124917900	124918549	+	650	3.04585	0
1871	chr16	8513250	8513549	+	300	3.04585	0
1872	chr2	113640700	113641299	+	600	3.04563	0
1873	chr5	24604650	24605349	+	700	3.04552	0
1874	chr14	68934650	68935449	+	800	3.04442	0
1875	chr4	31823550	31824549	+	1000	3.04432	0
1876	chr17	17404750	17405249	+	500	3.04394	0
1877	chr2	59562650	59563049	+	400	3.04379	0
1878	chr16	4586500	4586899	+	400	3.04346	0
1879	chr12	15749750	15750149	+	400	3.04346	0
1880	chr8	123065300	123065899	+	600	3.04097	0
1881	chr4	13364650	13365249	+	600	3.04097	0
1882	chr2	38068000	38068649	+	650	3.04097	0
1883	chr19	56547900	56548549	+	650	3.04021	0
1884	chr12	120028550	120028949	+	400	3.04021	0
1885	chr12	11265600	11266249	+	650	3.04002	0
1886	chr16	85803150	85803399	+	250	3.03898	0
1887	chr17	4626200	4626449	+	250	3.03835	0
1888	chr16	94227500	94227899	+	400	3.03793	0
1889	chr8	36611700	36612199	+	500	3.03734	0
1890	chr4	97628750	97629249	+	500	3.03734	0
1891	chr2	74685150	74685499	+	350	3.03734	0
1892	chr16	78576600	78576999	+	400	3.03734	0
1893	chr9	110407700	110408649	+	950	3.03699	0
1894	chr7	101905600	101905999	+	400	3.03699	0
1895	chr5	132060800	132061249	+	450	3.03699	0
1896	chr18	84087750	84088599	+	850	3.03675	0
1897	chr17	35241250	35241849	+	600	3.03675	0
1898	chr14	23524500	23524899	+	400	3.03675	0
1899	chr9	99568450	99568999	+	550	3.03643	0
1900	chr7	45707650	45707999	+	350	3.0364	0
1901	chr2	118533150	118533499	+	350	3.0364	0
1902	chr8	105297550	105297749	+	200	3.03561	0
1903	chr7	34653950	34654749	+	800	3.03561	0
1904	chr18	54978450	54978949	+	500	3.03561	0
1905	chr11	102088100	102088749	+	650	3.03561	0
1906	chr11	64588450	64588849	+	400	3.03561	0
1907	chrX	11807450	11807799	+	350	3.03521	0
1908	chr6	38433800	38434949	+	1150	3.0352	0
1909	chr10	25372300	25372949	+	650	3.0352	0
1910	chr17	86962800	86963499	+	700	3.03511	0
1911	chr16	28928650	28929249	+	600	3.03511	0
1912	chr13	42051200	42052049	+	850	3.03511	0
1913	chr2	74266500	74266799	+	300	3.03481	0
1914	chr2	14073950	14074349	+	400	3.03374	0
1915	chr18	52827700	52828099	+	400	3.03374	0
1916	chr3	126826250	126826549	+	300	3.03329	0
1917	chr15	102670800	102672249	+	1450	3.03329	0
1918	chr12	100187350	100187799	+	450	3.03329	0
1919	chr2	90745150	90745599	+	450	3.03269	0
1920	chr2	72123650	72124199	+	550	3.03269	0
1921	chr11	97840650	97841299	+	650	3.03269	0
1922	chr18	44644000	44644649	+	650	3.0324	0
1923	chr17	17827550	17827949	+	400	3.03227	0
1924	chr8	111299650	111300399	+	750	3.03179	0
1925	chr16	74093150	74093849	+	700	3.03179	0
1926	chr6	48841050	48841599	+	550	3.03138	0
1927	chr4	140701150	140701899	+	750	3.03114	0
1928	chr16	33832550	33833099	+	550	3.03086	0
1929	chr7	19715900	19716199	+	300	3.03	0
1930	chr5	114380350	114380849	+	500	3.03	0
1931	chr13	54837700	54837999	+	300	3.03	0
1932	chr8	60831800	60832199	+	400	3.02972	0
1933	chr18	78259400	78260199	+	800	3.02972	0
1934	chr12	4233650	4234249	+	600	3.02972	0
1935	chr4	40853800	40854099	+	300	3.02949	0
1936	chr7	30231900	30232799	+	900	3.02919	0
1937	chr16	17234100	17234449	+	350	3.02919	0
1938	chr11	51523200	51523499	+	300	3.02919	0
1939	chr9	44882150	44882999	+	850	3.02822	0
1940	chr8	106935300	106935799	+	500	3.02822	0
1941	chr8	33929600	33930099	+	500	3.02822	0
1942	chr7	73558300	73558699	+	400	3.02822	0
1943	chr13	38634800	38635249	+	450	3.02822	0
1944	chr4	114716700	114717099	+	400	3.02795	0
1945	chr11	79992450	79993199	+	750	3.02795	0
1946	chr1	38512200	38512899	+	700	3.02789	0
1947	chr5	65492450	65493299	+	850	3.02597	0
1948	chr8	120487000	120487299	+	300	3.02588	0
1949	chr13	93771550	93772249	+	700	3.02588	0
1950	chr17	37045650	37046349	+	700	3.02492	0
1951	chr11	102608250	102608649	+	400	3.0247	0
1952	chr2	116065500	116065899	+	400	3.02443	0
1953	chr5	143234950	143235249	+	300	3.02205	0
1954	chr4	33248600	33248899	+	300	3.02123	0
1955	chr7	16399800	16400499	+	700	3.02081	0
1956	chr7	29316900	29318049	+	1150	3.02041	0
1957	chr4	59003050	59003299	+	250	3.02041	0
1958	chr19	8740950	8741849	+	900	3.02041	0
1959	chr17	87236850	87237549	+	700	3.02041	0
1960	chr13	37826750	37827149	+	400	3.02041	0
1961	chr8	120264900	120266049	+	1150	3.02028	0
1962	chr7	36697400	36698249	+	850	3.01919	0
1963	chr17	4994050	4994699	+	650	3.01919	0
1964	chr12	3850650	3851049	+	400	3.01919	0
1965	chr7	101970750	101971149	+	400	3.01841	0
1966	chr4	107731900	107732649	+	750	3.01841	0
1967	chr5	64803900	64804299	+	400	3.01782	0
1968	chr1	86703700	86704049	+	350	3.01782	0
1969	chr4	106091950	106092349	+	400	3.01762	0
1970	chr12	69168750	69169149	+	400	3.01762	0
1971	chr4	82505350	82505949	+	600	3.01761	0
1972	chr17	29465400	29465949	+	550	3.0174	0
1973	chr6	83137350	83137849	+	500	3.01732	0
1974	chr6	52176900	52177349	+	450	3.01732	0
1975	chr4	103114200	103114849	+	650	3.01732	0
1976	chr18	36280600	36280999	+	400	3.01732	0
1977	chr10	127621300	127622199	+	900	3.01732	0
1978	chr4	105200750	105201149	+	400	3.01604	0
1979	chr6	35354800	35355149	+	350	3.01582	0
1980	chr7	68129850	68130149	+	300	3.01574	0
1981	chr5	32458750	32459199	+	450	3.01574	0
1982	chr5	16524450	16524749	+	300	3.01574	0
1983	chr3	89417900	89418599	+	700	3.01574	0
1984	chr3	7943700	7944199	+	500	3.01574	0
1985	chr18	35562100	35562599	+	500	3.01574	0
1986	chr15	103177650	103178199	+	550	3.01574	0
1987	chr11	95712400	95713499	+	1100	3.01574	0
1988	chr8	34806350	34808049	+	1700	3.01543	0
1989	chr8	33731800	33732599	+	800	3.01543	0
1990	chr3	98013350	98013699	+	350	3.01543	0
1991	chr2	25168450	25168749	+	300	3.01543	0
1992	chr8	90908050	90908599	+	550	3.01523	0
1993	chr17	45573600	45574199	+	600	3.01523	0
1994	chr4	141790650	141791099	+	450	3.0152	0
1995	chr9	77910300	77911199	+	900	3.01436	0
1996	chr1	16618800	16619599	+	800	3.01436	0
1997	chr11	60913600	60913999	+	400	3.01408	0
1998	chr8	120535750	120536649	+	900	3.0132	0
1999	chr8	24469300	24469649	+	350	3.01287	0
[truncated: 5,283 more rows]
