# Supplementary material for: GLI transcriptional repression regulates tissue-specific enhancer activity in response to Hedgehog signaling
Source: eLife. 2020 Jan 28;9:e50670. doi: 10.7554/eLife.50670 (PMC6986877; doi:10.7554/eLife.50670)
Supplement: Figure 1—source data 2. — H3K27ac called peaks with a FDR < 0.05 from two biological replicates from WT and Shh-/- E10.5 forelimbs. For each peak, the assigned Peak ID, coordinates, peak type, fold change normalized to input for WT and Shh-/- samples and fold change of WT over Shh-/- are listed. Additional tabs include sorted datasets for sub-classifications. Tabs containing GBRs indicate intersections with GLI binding regions. [file elife-50670-fig1-data2.xlsx]

## Sheet: All H3K27ac
Peak_ID	Chromosome	Start	End	Gli3_binding	Type	WTinput_FC	WTinput_adjPval	SHHnullinput_FC	SHHnullinput_adjPval	WTSHHnull_FC	WTSHHnull_adjPval
1	chr1	3399450	3399549	FALSE	SHHnullonly	0.778322	0.205969	3.24974	1.72436e-08	-1.47976	0.0438106
2	chr1	3399800	3399899	FALSE	Stable	2.04521	0.000928415	1.89501	0.000867737	0.129427	0.925958
3	chr1	4426550	4426649	FALSE	other	2.54207	4.29617e-05	0.443713	0.441288	0.496834	0.69275
4	chr1	4571150	4571949	TRUE	Stable	3.87923	1.07821e-09	2.84243	7.11972e-07	0.209636	0.8772
5	chr1	4572100	4572349	TRUE	other	3.47879	3.64204e-08	0.979278	0.0860496	0.469479	0.71228
6	chr1	4785300	4785749	FALSE	Stable	3.46289	4.14655e-08	1.97078	0.000536133	0.754165	0.478067
7	chr1	4786050	4786299	FALSE	Stable	2.30742	0.000194981	1.96289	0.000564329	0.63447	0.586398
8	chr1	4807550	4808299	FALSE	Stable	3.33381	1.19925e-07	2.9944	1.85661e-07	0.164329	0.906125
9	chr1	4829800	4829949	FALSE	Stable	2.91468	3.12584e-06	2.07904	0.000261817	0.81487	0.422637
10	chr1	4857100	4858399	TRUE	Stable	3.90832	8.25915e-10	2.9089	3.98129e-07	0.444974	0.727921
11	chr1	5083150	5083699	FALSE	Stable	4.11502	1.16766e-10	2.63277	4.16402e-06	0.308854	0.812099
12	chr1	6214200	6215399	FALSE	Stable	5.16965	1.93171e-15	4.15278	1.21654e-12	0.508542	0.684416
13	chr1	6448300	6448599	FALSE	other	3.27909	1.87116e-07	0.950873	0.0955562	0.298181	0.820024
14	chr1	6823900	6823999	FALSE	other	2.74699	1.04807e-05	-0.904294	0.113111	1.30951	0.09225
15	chr1	7088000	7089799	FALSE	Stable	4.00424	3.37746e-10	2.92944	3.32289e-07	0.368841	0.775832
16	chr1	7129150	7129249	FALSE	Stable	2.1111	0.000635561	1.18883	0.0368216	-0.0901651	0.950203
17	chr1	7130800	7130899	FALSE	Stable	1.55041	0.011793	2.41535	2.31144e-05	0.126721	0.92751
18	chr1	7131250	7131449	FALSE	Stable	2.96919	2.07808e-06	1.59119	0.00514858	-0.822301	0.416292
19	chr1	7132050	7132299	FALSE	Stable	2.09626	0.000692959	4.38977	7.58658e-14	-0.306035	0.813831
20	chr1	7397400	7397999	FALSE	Stable	3.45858	4.3032e-08	3.93488	1.44559e-11	0.490454	0.696918
21	chr1	7398500	7398649	FALSE	Stable	2.0383	0.00096514	1.24654	0.028582	0.764075	0.467954
22	chr1	7777350	7777999	FALSE	Stable	3.38276	8.02953e-08	2.766	1.37515e-06	-0.0585439	0.969308
23	chr1	7779400	7779499	FALSE	other	-0.273045	0.659587	2.6652	3.18798e-06	-0.145218	0.916648
24	chr1	8626050	8626149	FALSE	other	0.877556	0.153812	0.438562	0.446566	0.407854	0.750626
25	chr1	8626600	8626749	FALSE	Stable	1.26855	0.0391499	2.30617	5.25416e-05	-1.0584	0.222163
26	chr1	8626850	8626999	FALSE	Stable	2.85414	4.87099e-06	2.07827	0.00026307	-0.825651	0.413265
27	chr1	8744850	8744949	FALSE	Stable	2.52401	4.83492e-05	2.20127	0.000112264	0.322743	0.803236
28	chr1	9544800	9544949	FALSE	Stable	3.02519	1.36397e-06	2.56513	7.1833e-06	1.02145	0.248905
29	chr1	9545750	9545949	FALSE	Stable	3.22271	2.93439e-07	2.43215	2.03746e-05	0.757347	0.474665
30	chr1	9564750	9564849	FALSE	HH_dep	2.91332	3.15337e-06	0.280786	0.62826	1.6201	0.0218825
31	chr1	9700600	9700849	TRUE	Stable	2.21506	0.000344071	3.71007	1.67131e-10	-0.198884	0.883364
32	chr1	9747700	9748399	FALSE	Stable	2.79094	7.67934e-06	2.67679	2.90255e-06	0.338267	0.792957
33	chr1	9748700	9748899	FALSE	Stable	2.69817	1.47679e-05	1.89465	0.000869737	0.0355818	0.982407
34	chr1	9797800	9798049	FALSE	Stable	2.3412	0.000157971	1.9373	0.000664131	0.789854	0.445341
35	chr1	9798250	9798649	FALSE	Stable	2.57497	3.44512e-05	1.97321	0.000527819	1.1512	0.164945
36	chr1	9798900	9799049	FALSE	Stable	1.83083	0.00298005	1.20648	0.034083	0.179577	0.896516
37	chr1	9942700	9942849	FALSE	other	0.918519	0.135382	1.99082	0.000471107	0.119208	0.931884
38	chr1	9943150	9944199	FALSE	Stable	4.90114	3.68298e-14	3.21782	2.34416e-08	0.644068	0.577756
39	chr1	9944350	9944599	FALSE	Stable	4.84357	6.74053e-14	2.28212	6.26366e-05	0.542827	0.661407
40	chr1	10009150	10009699	FALSE	Stable	3.7496	3.47885e-09	1.53766	0.00687203	0.593814	0.62016
41	chr1	10037400	10038849	FALSE	Stable	5.03043	8.88925e-15	5.25931	9.01024e-19	0.390453	0.761858
42	chr1	10038900	10039049	FALSE	other	1.96092	0.00148845	0.691627	0.226924	0.235078	0.86015
43	chr1	10039750	10040299	FALSE	Stable	4.85035	6.28123e-14	2.97571	2.19485e-07	0.619866	0.598726
44	chr1	10231900	10233549	FALSE	Stable	3.65817	7.84425e-09	3.89828	2.16725e-11	0.490949	0.696467
45	chr1	10236100	10236649	FALSE	Stable	2.25908	0.000263419	3.31626	9.08139e-09	0.0452839	0.976271
46	chr1	10237050	10237549	FALSE	Stable	2.51424	5.16197e-05	2.4212	2.21321e-05	-0.207765	0.878138
47	chr1	10260750	10261349	FALSE	Stable	2.84617	5.15624e-06	1.96071	0.000572663	1.11087	0.189579
48	chr1	10261500	10262049	FALSE	Stable	3.37852	8.3188e-08	2.34833	3.84198e-05	0.996973	0.266778
49	chr1	10337050	10337199	FALSE	Stable	2.44862	7.93452e-05	1.20984	0.0336078	1.218	0.129927
50	chr1	10591750	10592099	FALSE	Stable	1.43711	0.0194972	2.86464	5.86668e-07	-0.043675	0.977226
51	chr1	10694600	10694699	FALSE	other	1.07209	0.0813496	1.61491	0.00451646	0.0185712	0.9898
52	chr1	10991200	10991299	FALSE	Stable	2.0473	0.000918156	1.63492	0.00404617	0.3916	0.761031
53	chr1	10993300	10995149	TRUE	Stable	4.76315	1.5324e-13	3.97047	9.66119e-12	0.453041	0.722953
54	chr1	11017800	11017949	FALSE	other	2.21862	0.000336643	0.504385	0.380637	0.687279	0.540651
55	chr1	11024650	11025149	FALSE	Stable	3.14747	5.30578e-07	3.66282	2.76349e-10	0.454168	0.722145
56	chr1	11025450	11025749	FALSE	Stable	2.52775	4.72863e-05	2.36683	3.34373e-05	0.390187	0.762038
57	chr1	11026200	11026549	FALSE	other	2.04693	0.000920169	0.996781	0.0804817	0.821484	0.417045
58	chr1	11027700	11027849	FALSE	other	2.31383	0.00018745	0.855656	0.133917	0.848313	0.391805
59	chr1	11034450	11034649	FALSE	Stable	2.55971	3.82274e-05	1.37807	0.0154569	0.413703	0.747227
60	chr1	11164850	11164949	FALSE	HH_dep	2.16082	0.000474766	-1.23155	0.030549	2.36543	0.000128703
61	chr1	11199600	11199699	FALSE	Stable	1.75533	0.00438199	2.04523	0.000328668	0.701762	0.526567
62	chr1	11329100	11329449	FALSE	Stable	1.78564	0.00377121	3.258	1.59806e-08	-0.0222978	0.988304
63	chr1	11329500	11330499	FALSE	Stable	3.54941	2.00344e-08	3.42818	3.0132e-09	0.0816222	0.955856
64	chr1	11330550	11331049	FALSE	Stable	2.51384	5.17641e-05	2.77334	1.29153e-06	0.120247	0.931335
65	chr1	11354700	11355499	FALSE	Stable	3.06258	1.02561e-06	2.92776	3.37304e-07	-0.0286245	0.985725
66	chr1	11355600	11355999	FALSE	Stable	2.46169	7.30183e-05	2.94682	2.84733e-07	0.28929	0.824233
67	chr1	11590300	11590449	FALSE	SHHnullonly	-1.19549	0.0519522	2.65876	3.36058e-06	-1.54568	0.0321196
68	chr1	11624100	11624249	FALSE	Stable	2.45541	7.60398e-05	1.39106	0.0145081	1.03666	0.238374
69	chr1	12031600	12031949	FALSE	Stable	2.10713	0.00065048	3.26427	1.50687e-08	-0.595741	0.619131
70	chr1	12032400	12033399	FALSE	Stable	2.57952	3.33963e-05	3.22283	2.23415e-08	-0.359699	0.781431
71	chr1	12050950	12051049	FALSE	Stable	1.53235	0.0127753	2.03098	0.000361103	-0.519406	0.676939
72	chr1	12051150	12052099	FALSE	Stable	2.98813	1.80276e-06	3.76003	9.76782e-11	-0.423488	0.740655
73	chr1	12052150	12053449	FALSE	Stable	3.37683	8.44034e-08	3.62484	4.10218e-10	-0.193694	0.887239
74	chr1	12397650	12398249	FALSE	Stable	2.68188	1.656e-05	3.4265	3.06429e-09	-0.364884	0.778123
75	chr1	12398300	12398949	FALSE	Stable	3.68084	6.40749e-09	2.37908	3.05348e-05	-0.0159923	0.991081
76	chr1	12509850	12510949	FALSE	Stable	2.98927	1.78773e-06	2.82499	8.24955e-07	0.628318	0.591773
77	chr1	12576950	12577449	FALSE	Stable	2.66529	1.86259e-05	3.33774	7.41196e-09	0.294311	0.821992
78	chr1	12717950	12718099	FALSE	other	2.91332	3.15337e-06	0.792295	0.165538	0.102409	0.942416
79	chr1	12776450	12776849	FALSE	Stable	2.66336	1.88689e-05	2.60612	5.16107e-06	-0.462802	0.716659
80	chr1	12791600	12791749	FALSE	Stable	1.85112	0.0026817	2.19067	0.000120937	-0.360316	0.780922
81	chr1	12836600	12836699	FALSE	Stable	3.32983	1.23609e-07	3.32602	8.30546e-09	0.00380444	0.997947
82	chr1	13196250	13196399	FALSE	Stable	3.73548	3.94922e-09	1.32509	0.0199181	-0.418214	0.744465
83	chr1	13196600	13196899	FALSE	Stable	2.28071	0.000230539	2.95368	2.67152e-07	-0.706181	0.523329
84	chr1	13197550	13197749	FALSE	Stable	1.85331	0.00265223	2.618	4.69238e-06	-0.795832	0.440458
85	chr1	13244550	13244699	FALSE	HH_dep	2.04854	0.000913707	-0.643283	0.261485	1.6576	0.01786
86	chr1	13245200	13245699	FALSE	other	3.0069	1.56424e-06	0.885068	0.121028	1.08449	0.206049
87	chr1	13245900	13246549	FALSE	Stable	3.1693	4.47492e-07	2.23604	8.76148e-05	0.758181	0.473932
88	chr1	13372600	13374649	TRUE	Stable	4.45607	3.9446e-12	4.24794	3.97068e-13	0.441262	0.72991
89	chr1	13426750	13426949	FALSE	Stable	1.77517	0.00397569	2.47963	1.412e-05	0.00258355	0.99862
90	chr1	13589050	13589999	TRUE	Stable	3.5087	2.81641e-08	3.30736	9.92133e-09	0.369311	0.775246
91	chr1	13603600	13603699	FALSE	Stable	3.11604	6.78918e-07	3.25826	1.59363e-08	-0.142216	0.918571
92	chr1	13660100	13660499	FALSE	Stable	3.49563	3.15179e-08	2.0226	0.0003818	0.437354	0.732658
93	chr1	13860300	13860599	FALSE	Stable	2.93507	2.67603e-06	1.7554	0.00203245	0.882606	0.360904
94	chr1	13860750	13861399	FALSE	Stable	3.41995	5.94356e-08	2.63246	4.17454e-06	0.887489	0.356814
95	chr1	13861500	13862199	FALSE	Stable	4.24168	3.45513e-11	2.86153	6.03494e-07	0.757844	0.474135
96	chr1	13931950	13932049	FALSE	other	3.01553	1.46368e-06	0.482367	0.40177	0.931642	0.319583
97	chr1	13935450	13935849	FALSE	Stable	4.05798	2.0188e-10	2.10274	0.000222779	1.34539	0.0795667
98	chr1	13936450	13936649	FALSE	HH_dep	2.86343	4.55378e-06	0.562157	0.327418	1.69141	0.0146334
99	chr1	14053650	14053749	FALSE	other	2.81323	6.53936e-06	-0.401233	0.486964	0.872692	0.369344
100	chr1	14136650	14136799	FALSE	HH_dep	3.18577	3.92899e-07	-0.494758	0.389854	1.84358	0.00595379
101	chr1	14146550	14146649	TRUE	HH_dep	2.94473	2.48942e-06	-0.447066	0.437782	1.79028	0.0082316
102	chr1	14184050	14184199	TRUE	Stable	2.76642	9.16071e-06	1.91646	0.000758935	1.23591	0.121771
103	chr1	14184450	14186299	TRUE	Stable	3.47848	3.65243e-08	2.24772	8.0559e-05	1.01543	0.253126
104	chr1	14186400	14186599	FALSE	Stable	2.76133	9.47291e-06	2.13878	0.000174063	1.0085	0.257801
105	chr1	14207650	14207749	FALSE	other	0.293343	0.635867	3.11816	5.95892e-08	-0.837346	0.402066
106	chr1	14305850	14305999	FALSE	Stable	2.0473	0.000918156	1.9195	0.000743868	0.10703	0.939712
107	chr1	14306150	14306399	FALSE	Stable	3.10403	7.45895e-07	1.46239	0.0101589	0.614693	0.603282
108	chr1	14306750	14306899	FALSE	Stable	2.97202	2.0352e-06	1.50596	0.0081117	0.856194	0.38351
109	chr1	14306950	14307149	FALSE	Stable	2.73395	1.15073e-05	1.2467	0.0285665	0.232476	0.861956
110	chr1	14307550	14308899	FALSE	Stable	3.03748	1.24032e-06	2.67289	2.99507e-06	0.119575	0.931762
111	chr1	14309200	14310349	FALSE	Stable	3.50961	2.79383e-08	3.48314	1.74327e-09	0.402486	0.753919
112	chr1	14310500	14310749	FALSE	Stable	2.89896	3.50371e-06	1.87948	0.000956884	0.99179	0.271301
113	chr1	14357350	14357699	TRUE	Stable	1.86837	0.00245383	3.11761	5.98891e-08	0.723699	0.506695
114	chr1	14358000	14358199	TRUE	Stable	2.89445	3.6168e-06	2.75951	1.44912e-06	0.10726	0.939596
115	chr1	14464850	14465299	FALSE	other	3.61579	1.13418e-08	0.77588	0.174596	0.806067	0.430158
116	chr1	14504200	14504299	FALSE	Stable	2.66117	1.91434e-05	1.71101	0.00262838	-0.0767843	0.958362
117	chr1	14505000	14505149	FALSE	Stable	1.33762	0.0296631	2.22727	9.33812e-05	0.406479	0.750944
118	chr1	14511950	14512049	FALSE	Stable	1.2228	0.0467859	1.78613	0.0016918	0.411707	0.747805
119	chr1	14512300	14512649	FALSE	Stable	2.86135	4.62818e-06	2.15614	0.000153914	0.0842853	0.954082
120	chr1	14512850	14512949	FALSE	other	1.15985	0.0593175	1.75105	0.00208403	-0.62234	0.596871
121	chr1	14513050	14513549	FALSE	Stable	3.13713	5.76501e-07	2.29192	5.83165e-05	0.293997	0.822022
122	chr1	14841050	14841149	FALSE	other	0.576544	0.349731	0.752682	0.188028	-0.203824	0.880606
123	chr1	14842100	14842299	FALSE	Stable	3.96177	5.03242e-10	1.75899	0.00198982	0.184166	0.893188
124	chr1	15032850	15032999	FALSE	Stable	1.4768	0.0164158	2.62735	4.34507e-06	-1.15055	0.16534
125	chr1	15033950	15034099	FALSE	other	2.57418	3.45958e-05	0.931369	0.102606	0.292698	0.82266
126	chr1	15034400	15034749	FALSE	Stable	1.37549	0.0253728	3.9181	1.74226e-11	-0.399979	0.755452
127	chr1	15286700	15286949	FALSE	Stable	3.88611	1.01013e-09	2.58168	6.30791e-06	0.291998	0.823081
128	chr1	15357200	15357699	FALSE	Stable	1.36003	0.0270452	3.89762	2.17529e-11	-0.564648	0.644636
129	chr1	15358000	15358149	FALSE	Stable	2.64301	2.16161e-05	2.53321	9.24971e-06	0.0890269	0.950854
130	chr1	15358600	15358749	FALSE	Stable	2.28526	0.000224703	2.50449	1.15971e-05	0.166722	0.904821
131	chr1	15358800	15359049	FALSE	Stable	2.77013	8.93284e-06	1.6769	0.00320178	-0.16155	0.907608
132	chr1	15451650	15451949	FALSE	other	4.74881	1.78013e-13	0.149145	0.79854	1.4077	0.0607648
133	chr1	15613900	15613999	FALSE	other	3.11427	6.8677e-07	0.840547	0.141119	0.672202	0.554454
134	chr1	15804950	15806499	FALSE	Stable	4.7419	1.91412e-13	3.70534	1.75327e-10	0.364435	0.778416
135	chr1	16059300	16059599	FALSE	Stable	4.272	2.54798e-11	1.25442	0.0275951	0.411955	0.747774
136	chr1	16103600	16105299	TRUE	Stable	4.78222	1.26998e-13	3.99204	7.62844e-12	0.334724	0.795268
137	chr1	16115550	16115799	FALSE	Stable	3.56502	1.74617e-08	1.44304	0.0111946	0.285039	0.826561
138	chr1	16213550	16213649	FALSE	other	2.02614	0.00103403	0.145063	0.803852	0.854119	0.385894
139	chr1	16217500	16217599	FALSE	other	2.13238	0.00056213	-0.0780724	0.893588	1.1835	0.147195
140	chr1	16227800	16229049	FALSE	Stable	3.7957	2.29333e-09	2.65113	3.58144e-06	0.607589	0.609281
141	chr1	16241150	16241299	FALSE	Stable	2.60325	2.83996e-05	1.16342	0.0410525	0.829973	0.408777
142	chr1	16248250	16250249	TRUE	Stable	4.16676	7.1332e-11	3.26251	1.52951e-08	0.574619	0.636876
143	chr1	16250300	16250599	FALSE	Stable	2.59163	3.0742e-05	1.75023	0.00209405	0.583829	0.629941
144	chr1	16268550	16268949	FALSE	Stable	2.40033	0.000108358	2.60584	5.17361e-06	-0.240103	0.856406
145	chr1	16519050	16519299	FALSE	Stable	4.06217	1.9342e-10	1.43583	0.0116156	0.284574	0.826855
146	chr1	16519450	16520249	FALSE	Stable	3.98654	3.97976e-10	3.89564	2.22525e-11	0.417364	0.744832
147	chr1	16606750	16606849	FALSE	Stable	2.00047	0.00119495	3.29279	1.14436e-08	-0.730924	0.500275
148	chr1	16607250	16607849	FALSE	Stable	3.42629	5.6323e-08	2.53648	9.01648e-06	-0.314685	0.808179
149	chr1	16607950	16608099	FALSE	Stable	2.52674	4.75556e-05	1.55506	0.00625812	0.9509	0.303769
150	chr1	16618500	16619299	TRUE	Stable	4.1227	1.08624e-10	3.54216	9.57035e-10	0.448596	0.725842
151	chr1	16656050	16657349	FALSE	Stable	3.6333	9.70684e-09	3.5326	1.05285e-09	0.267167	0.837886
152	chr1	16657400	16658049	FALSE	Stable	2.19545	0.000386723	4.4029	6.44729e-14	-0.0719352	0.961228
153	chr1	16665150	16665849	FALSE	Stable	3.75682	3.26511e-09	2.24173	8.40945e-05	0.687926	0.539975
154	chr1	16687950	16688699	FALSE	Stable	3.10944	7.14441e-07	2.6225	4.52209e-06	0.28036	0.828873
155	chr1	16688900	16689099	FALSE	Stable	1.41845	0.0211252	2.84043	7.23242e-07	0.565492	0.643961
156	chr1	16855250	16855449	FALSE	Stable	2.21395	0.000346169	1.54984	0.00643495	-0.362843	0.779249
157	chr1	17154150	17154449	FALSE	Stable	2.57618	3.41635e-05	1.48453	0.00907431	0.40271	0.753732
158	chr1	17154550	17154749	FALSE	Stable	2.90018	3.47053e-06	1.4745	0.00955544	0.657743	0.565968
159	chr1	17155050	17155149	FALSE	other	1.12156	0.0682043	0.203664	0.726318	0.473113	0.7098
160	chr1	17237550	17237649	FALSE	Stable	2.62378	2.4748e-05	1.98014	0.000504217	-0.368797	0.775832
161	chr1	17726900	17728149	FALSE	Stable	4.49744	2.56183e-12	3.6933	1.99588e-10	0.0732371	0.960725
162	chr1	18460900	18461049	FALSE	Stable	1.44792	0.0186056	1.77521	0.00180542	-0.0373409	0.981199
163	chr1	18461850	18461949	FALSE	other	0.968233	0.11559	2.04523	0.000328668	0.496834	0.69275
164	chr1	18462400	18462499	FALSE	Stable	1.62354	0.0083594	2.03098	0.000361103	-0.428222	0.737805
165	chr1	18463450	18463549	FALSE	Stable	2.15661	0.00048636	1.36597	0.0163821	0.769862	0.463016
166	chr1	18512050	18512549	FALSE	Stable	3.54336	2.10962e-08	1.87368	0.000992031	0.637881	0.583611
167	chr1	19209900	19210049	FALSE	HH_dep	1.76627	0.00415326	0.945749	0.0973787	1.52756	0.0349463
168	chr1	19211150	19211249	FALSE	other	2.28082	0.000230412	0.0986868	0.865942	0.163516	0.906399
169	chr1	20134550	20134949	TRUE	HH_dep	4.35472	1.11409e-11	0.434554	0.450838	2.08322	0.00119456
170	chr1	20135450	20135749	TRUE	Stable	2.6798	1.67941e-05	1.44433	0.0111219	1.42288	0.0567458
171	chr1	20138450	20138649	FALSE	other	2.4208	9.51711e-05	-0.178098	0.759961	1.24878	0.116169
172	chr1	20139350	20139449	FALSE	other	3.20014	3.51023e-07	0.145063	0.803852	1.03646	0.238513
173	chr1	20139900	20140099	FALSE	HH_dep	2.54438	4.23851e-05	-1.39113	0.0145081	2.09856	0.00107473
174	chr1	20502750	20502999	FALSE	other	3.38716	7.73826e-08	0.144361	0.80451	0.414193	0.747071
175	chr1	20503250	20503499	FALSE	Stable	3.1011	7.6315e-07	2.40188	2.56071e-05	-0.327733	0.800162
176	chr1	20503550	20503799	FALSE	Stable	2.53614	4.45975e-05	3.13039	5.31955e-08	0.380795	0.768037
177	chr1	20507950	20508049	FALSE	Stable	2.12261	0.000593286	1.44474	0.0111012	0.657094	0.566509
178	chr1	20819300	20819499	FALSE	Stable	3.6975	5.52587e-09	1.30516	0.0218385	0.373723	0.772815
179	chr1	20819650	20820349	FALSE	Stable	3.95305	5.46439e-10	3.84037	4.08364e-11	0.737089	0.493942
180	chr1	20951050	20951349	FALSE	Stable	2.82033	6.2149e-06	2.20797	0.000107167	0.161711	0.907537
181	chr1	20951950	20952249	FALSE	Stable	2.39168	0.000114474	2.9721	2.26608e-07	0.556035	0.65098
182	chr1	20995000	20995099	FALSE	other	-0.936543	0.127881	2.41535	2.31144e-05	-0.558858	0.648588
183	chr1	21070150	21070249	FALSE	other	-0.250964	0.685521	2.81091	9.31433e-07	-0.268842	0.836605
184	chr1	21078950	21079049	FALSE	Stable	2.10255	0.000667673	1.94277	0.000641558	-0.450075	0.725408
185	chr1	21079400	21079899	FALSE	Stable	4.08798	1.5095e-10	2.86392	5.90433e-07	0.340664	0.791932
186	chr1	21218600	21218849	FALSE	Stable	2.3141	0.000187219	1.6842	0.00306949	0.230961	0.862855
187	chr1	21380600	21380749	FALSE	other	2.46113	7.32803e-05	0.680808	0.23448	1.33555	0.0829931
188	chr1	21621750	21621949	FALSE	other	0.627722	0.308181	2.52638	9.74053e-06	-0.923621	0.326663
189	chr1	21622850	21622949	FALSE	other	2.96242	2.18975e-06	0.744007	0.193213	0.616888	0.601513
190	chr1	22248700	22248949	FALSE	HH_sens	2.48532	6.26405e-05	2.92051	3.59172e-07	1.55228	0.0311057
191	chr1	22249400	22249749	FALSE	Stable	3.0706	9.62149e-07	2.15971	0.000150116	0.556581	0.650562
192	chr1	23256300	23256949	FALSE	Stable	3.5707	1.66463e-08	2.70339	2.32205e-06	0.244175	0.853581
193	chr1	23301450	23301599	FALSE	Stable	3.05865	1.05655e-06	2.60719	5.11848e-06	0.430688	0.736124
194	chr1	23382500	23383149	FALSE	Stable	3.82884	1.70699e-09	2.81295	9.16607e-07	0.71882	0.511553
195	chr1	23383500	23383899	FALSE	Stable	3.53892	2.19042e-08	3.19182	3.00233e-08	0.315957	0.807268
196	chr1	23384000	23384099	FALSE	other	1.12857	0.0665579	0.500596	0.384202	1.01392	0.254122
197	chr1	23921850	23922149	FALSE	Stable	3.55144	1.96749e-08	2.44186	1.88723e-05	0.268444	0.836901
198	chr1	24005100	24005599	FALSE	Stable	2.95744	2.27172e-06	2.82193	8.47108e-07	0.387777	0.763467
199	chr1	24099550	24100349	FALSE	Stable	3.98535	4.02972e-10	3.37657	5.03571e-09	0.669704	0.556631
200	chr1	24100450	24100899	FALSE	Stable	2.46343	7.22454e-05	2.61327	4.87423e-06	0.272704	0.83416
201	chr1	24141350	24142199	FALSE	Stable	2.54912	4.1206e-05	3.63871	3.56019e-10	0.461431	0.717858
202	chr1	24142600	24142949	FALSE	Stable	3.20581	3.36579e-07	2.16933	0.000140509	0.539886	0.6634
203	chr1	24143100	24143249	FALSE	other	2.93305	2.71472e-06	0.756485	0.185936	1.33544	0.0830091
204	chr1	24195000	24196199	TRUE	Stable	4.79652	1.10654e-13	3.57185	7.06532e-10	-0.0157003	0.991205
205	chr1	24196550	24197099	TRUE	Stable	2.55198	4.03815e-05	3.28786	1.20081e-08	0.32679	0.80065
206	chr1	24225800	24226149	FALSE	Stable	2.82863	5.83992e-06	2.53262	9.29452e-06	0.774286	0.459441
207	chr1	24226600	24226849	FALSE	HH_sens	2.65834	1.95142e-05	2.11593	0.000203472	1.51744	0.0365798
208	chr1	24239200	24239399	FALSE	HH_dep	3.03857	1.23025e-06	0.620758	0.27898	1.80796	0.00741504
209	chr1	24239700	24239849	FALSE	other	4.37642	8.8881e-12	0.168037	0.773408	1.37977	0.068599
210	chr1	24240600	24240699	FALSE	Stable	1.35247	0.0279044	2.16117	0.000148582	0.166334	0.905197
211	chr1	24240800	24240999	FALSE	Stable	2.76133	9.47291e-06	1.14248	0.0448442	1.0007	0.263714
212	chr1	24310650	24311399	FALSE	Stable	3.60516	1.24118e-08	1.78794	0.00167384	1.36657	0.072894
213	chr1	24397450	24397549	FALSE	Stable	3.40327	6.76785e-08	1.87221	0.0010009	-0.0704598	0.961949
214	chr1	24560250	24560349	FALSE	HH_dep	1.91474	0.00191039	-0.581134	0.311261	1.46892	0.0460256
215	chr1	24678650	24679099	FALSE	Stable	3.24269	2.49496e-07	3.34156	7.12949e-09	0.516755	0.678837
216	chr1	25188450	25188649	FALSE	Stable	3.53758	2.20965e-08	1.31899	0.020489	0.617069	0.601492
217	chr1	25189000	25189199	FALSE	Stable	2.59354	3.03571e-05	2.56063	7.4441e-06	0.0121301	0.993313
218	chr1	25606650	25607199	FALSE	Stable	2.23994	0.000295465	3.15069	4.41538e-08	-0.488212	0.697973
219	chr1	28047350	28047599	FALSE	Stable	2.51893	5.00147e-05	2.74495	1.63608e-06	-0.670808	0.555712
220	chr1	28047650	28047849	FALSE	other	0.87389	0.155518	2.06028	0.000297443	-1.2196	0.129123
221	chr1	28220300	28220549	FALSE	Stable	2.19079	0.000396803	2.47992	1.40891e-05	-0.898986	0.346836
222	chr1	28221050	28221249	FALSE	other	0.758787	0.217582	3.29715	1.0961e-08	-0.979765	0.280605
223	chr1	28221700	28221799	FALSE	other	0.777417	0.206468	2.59606	5.60436e-06	-0.52252	0.675246
224	chr1	28222400	28222499	FALSE	Stable	2.24888	0.000279555	2.54727	8.27537e-06	-0.298387	0.819813
225	chr1	29217400	29217499	FALSE	SHHnullonly	-0.0364608	0.953049	1.81404	0.00143243	-1.87127	0.00493835
226	chr1	29936700	29936799	FALSE	other	0.928878	0.131064	-0.507865	0.377268	0.409791	0.749244
227	chr1	30527100	30527199	FALSE	SHHnullonly	-1.56468	0.0110314	1.64632	0.00379448	-1.6524	0.0183542
228	chr1	30536200	30538699	FALSE	Stable	3.14347	5.47667e-07	3.73327	1.30531e-10	-0.759348	0.472658
229	chr1	30539450	30539649	FALSE	Stable	1.88942	0.0021908	2.79599	1.05985e-06	-0.934251	0.317731
230	chr1	30540000	30540099	FALSE	other	1.04665	0.088787	1.00182	0.0789054	0.0171488	0.990405
231	chr1	30540450	30540649	FALSE	other	0.673708	0.274022	3.18396	3.22783e-08	-0.951651	0.303107
232	chr1	30541800	30542099	FALSE	Stable	2.31942	0.000181036	3.12024	5.85791e-08	-0.414865	0.746519
233	chr1	30542250	30542349	FALSE	other	0.233504	0.706429	1.43915	0.0114202	-1.23886	0.120609
234	chr1	30872750	30874649	TRUE	Stable	4.39381	7.46909e-12	4.0861	2.62928e-12	0.268096	0.837182
235	chr1	30948600	30951199	FALSE	Stable	4.89777	3.78787e-14	5.08723	1.04262e-17	0.263447	0.839747
236	chr1	31058500	31058799	FALSE	Stable	3.02657	1.34939e-06	1.52699	0.00726461	0.46778	0.713303
237	chr1	31096400	31096499	FALSE	other	3.46326	4.13522e-08	0.183819	0.752454	1.26082	0.110865
238	chr1	31142100	31142399	FALSE	Stable	1.44575	0.0187771	3.36056	5.91228e-09	-0.356201	0.783085
239	chr1	31148650	31148799	FALSE	Stable	2.38985	0.000115851	1.48638	0.00898767	0.135524	0.922937
240	chr1	31148850	31149099	FALSE	Stable	2.86368	4.54942e-06	2.94572	2.87533e-07	-0.115256	0.934218
241	chr1	31149150	31149599	TRUE	Stable	2.99315	1.73631e-06	2.38358	2.95144e-05	0.709569	0.519294
242	chr1	31149700	31150649	TRUE	Stable	3.09817	7.80285e-07	3.97083	9.62033e-12	0.0888414	0.950971
243	chr1	31150800	31150899	FALSE	Stable	3.75602	3.28548e-09	1.29381	0.0230163	0.860686	0.380064
244	chr1	32363850	32364449	FALSE	Stable	1.4159	0.0213504	3.74565	1.14403e-10	-1.03362	0.240407
245	chr1	32553650	32553799	FALSE	Stable	1.47095	0.0168468	2.17558	0.000134462	-0.725402	0.505142
246	chr1	32568350	32568449	FALSE	other	0.0648639	0.917031	2.16368	0.00014608	-0.111339	0.936533
247	chr1	32582550	32582649	FALSE	SHHnullonly	-1.10339	0.0728045	2.34553	3.92391e-05	-1.87508	0.00480865
248	chr1	32934050	32934399	FALSE	Stable	1.81989	0.00315542	3.23069	2.07432e-08	-1.02485	0.246766
249	chr1	33023450	33023749	FALSE	Stable	3.22733	2.82336e-07	2.99176	1.89694e-07	-1.11454	0.187244
250	chr1	33024000	33024199	FALSE	Stable	3.44771	4.71907e-08	2.26214	7.27156e-05	0.158618	0.909086
251	chr1	33024600	33025049	FALSE	Stable	3.28212	1.8279e-07	2.95368	2.67152e-07	-0.4395	0.73141
252	chr1	33459950	33460199	FALSE	Stable	2.44533	8.10503e-05	2.33343	4.29254e-05	0.0786808	0.957124
253	chr1	33460600	33461099	FALSE	Stable	2.78659	7.93574e-06	4.11574	1.85569e-12	0.224396	0.867726
254	chr1	33463800	33463999	FALSE	other	3.59492	1.35206e-08	0.0124272	0.98288	1.24071	0.120082
255	chr1	33464550	33464999	FALSE	Stable	1.86384	0.00250737	3.39769	4.09254e-09	-0.190613	0.889491
256	chr1	33465050	33465249	FALSE	Stable	2.71405	1.32383e-05	2.5489	8.17937e-06	-0.18915	0.890042
257	chr1	33465850	33466449	FALSE	Stable	2.6034	2.83996e-05	2.64274	3.83841e-06	-0.318423	0.805649
258	chr1	33466800	33467099	FALSE	other	-0.199489	0.747957	3.07892	8.60329e-08	-0.846608	0.393597
259	chr1	33501150	33501299	FALSE	Stable	1.62552	0.00828899	1.18495	0.0374417	1.00196	0.262676
260	chr1	33501700	33502049	FALSE	Stable	1.41905	0.0210831	2.53972	8.7907e-06	-0.669416	0.556685
261	chr1	33502350	33503299	FALSE	Stable	3.08799	8.4273e-07	2.96589	2.39754e-07	-0.138628	0.920933
262	chr1	33503650	33503999	FALSE	Stable	2.65913	1.94116e-05	2.31354	4.97914e-05	-0.174456	0.899413
263	chr1	33504350	33504599	FALSE	Stable	2.27919	0.000232824	2.72258	1.97837e-06	0.263659	0.839654
264	chr1	33510750	33510899	FALSE	SHHnullonly	0.1795	0.772444	2.4755	1.45815e-05	-1.7346	0.0113682
265	chr1	33669500	33669749	FALSE	Stable	2.38086	0.000122828	1.19188	0.0363511	0.0155812	0.991276
266	chr1	33669800	33670499	FALSE	Stable	4.29041	2.11869e-11	2.97568	2.19525e-07	0.278082	0.830659
267	chr1	33719850	33720699	TRUE	Stable	3.41859	6.01623e-08	3.24768	1.75903e-08	0.379766	0.768514
268	chr1	33757400	33758049	FALSE	Stable	3.3432	1.10897e-07	2.27153	6.78587e-05	0.244504	0.853314
269	chr1	33813750	33814549	FALSE	Stable	4.53646	1.70035e-12	3.92156	1.67492e-11	0.675815	0.550618
270	chr1	33814700	33814849	FALSE	Stable	2.36704	0.000134228	1.72074	0.00248459	0.613087	0.604535
271	chr1	34005250	34006449	FALSE	Stable	3.38129	8.12333e-08	3.52637	1.1232e-09	0.09628	0.94618
272	chr1	34019750	34019849	FALSE	other	1.5456	0.0120317	0.960709	0.0920806	0.970849	0.287567
273	chr1	34020600	34020699	FALSE	other	2.21395	0.000346169	0.397062	0.491627	0.466774	0.713604
274	chr1	34052900	34053099	FALSE	other	1.07405	0.0807816	2.46434	1.58763e-05	0.168308	0.903654
275	chr1	34103350	34103649	FALSE	Stable	3.05913	1.0536e-06	1.55622	0.00622377	0.734973	0.496225
276	chr1	34133300	34133499	FALSE	Stable	3.23464	2.66503e-07	1.42352	0.0123618	0.209603	0.877212
277	chr1	34134100	34134249	FALSE	other	1.98292	0.00131862	0.574791	0.316587	0.0580183	0.969604
278	chr1	34408250	34408549	FALSE	Stable	1.24298	0.0432711	2.6567	3.4184e-06	-0.222203	0.869412
279	chr1	34432950	34433349	FALSE	Stable	2.63462	2.29527e-05	2.79816	1.04022e-06	0.216212	0.873328
280	chr1	34434850	34435799	FALSE	Stable	3.46417	4.11109e-08	3.93787	1.39809e-11	0.395894	0.758636
281	chr1	34439400	34439699	FALSE	Stable	1.5239	0.013276	2.4646	1.58572e-05	0.191739	0.888354
282	chr1	34780100	34780249	FALSE	other	1.02433	0.0957914	1.34544	0.0180961	-0.0918483	0.949112
283	chr1	34841800	34843849	TRUE	Stable	4.90892	3.37214e-14	4.29045	2.44216e-13	0.164878	0.905906
284	chr1	35579200	35579399	FALSE	other	0.16711	0.787675	3.67979	2.29376e-10	-0.527309	0.673051
285	chr1	35667600	35668399	FALSE	Stable	2.4894	6.09565e-05	2.94351	2.93128e-07	0.0241638	0.987437
286	chr1	35668800	35669199	FALSE	Stable	1.87492	0.00236963	4.38769	7.76334e-14	-0.0809745	0.955992
287	chr1	35875150	35875349	FALSE	Stable	2.25297	0.000272612	2.7177	2.05973e-06	0.0966748	0.945915
288	chr1	35935200	35935649	FALSE	Stable	2.30772	0.000194622	2.76891	1.34254e-06	-0.718766	0.511599
289	chr1	35935700	35935799	FALSE	Stable	1.77185	0.00404489	1.74776	0.00212469	0.410045	0.749172
290	chr1	35954100	35954299	FALSE	Stable	3.12089	6.53838e-07	1.94277	0.000641558	0.568267	0.641876
291	chr1	35973650	35973749	FALSE	Stable	1.58683	0.00994386	3.57307	6.97346e-10	0.00123623	0.999188
292	chr1	35973900	35973999	FALSE	Stable	2.91353	3.15e-06	1.39513	0.0142233	0.908547	0.338998
293	chr1	35977850	35977999	FALSE	Stable	2.91332	3.15337e-06	3.25101	1.70775e-08	-0.337694	0.7933
294	chr1	35978100	35978199	FALSE	Stable	1.63178	0.00805383	1.24133	0.0292445	0.951839	0.302994
295	chr1	35978750	35978849	FALSE	other	0.833629	0.175375	3.2031	2.69857e-08	0.201566	0.881792
296	chr1	35986250	35986399	FALSE	Stable	1.70875	0.00553926	2.28282	6.2313e-05	-0.928377	0.322328
297	chr1	35991800	35991899	FALSE	Stable	1.53235	0.0127753	3.62627	4.03942e-10	-1.10226	0.194609
298	chr1	35992250	35992749	FALSE	Stable	3.52877	2.37264e-08	2.24136	8.43265e-05	-0.0117098	0.993598
299	chr1	35993100	35993249	FALSE	Stable	1.58096	0.0102266	2.87983	5.13777e-07	-0.737475	0.49358
300	chr1	36015700	36015799	FALSE	Stable	1.33124	0.0304344	1.94412	0.000636337	-0.640565	0.581208
301	chr1	36016600	36018399	FALSE	Stable	3.67158	6.96473e-09	3.23256	2.03698e-08	0.68917	0.538946
302	chr1	36090650	36090949	FALSE	other	2.58788	3.1533e-05	0.316816	0.584776	0.434116	0.734122
303	chr1	36243700	36244199	FALSE	Stable	3.62726	1.02452e-08	2.06707	0.000284074	0.937885	0.314242
304	chr1	36368600	36368749	TRUE	other	2.57502	3.44372e-05	1.10156	0.0531992	0.632334	0.588255
305	chr1	36368850	36369199	TRUE	Stable	2.19727	0.000382324	4.3528	1.17199e-13	0.138915	0.920759
306	chr1	36444750	36445199	FALSE	Stable	3.60265	1.2689e-08	2.54062	8.72558e-06	0.348897	0.787618
307	chr1	36471300	36471449	FALSE	Stable	1.25728	0.0409049	3.61963	4.32758e-10	-0.053786	0.972032
308	chr1	36471800	36471949	FALSE	other	0.869239	0.157648	3.32378	8.47285e-09	0.116501	0.933294
309	chr1	36511800	36512199	TRUE	Stable	3.25153	2.33419e-07	3.49188	1.59928e-09	0.210902	0.876325
310	chr1	36547600	36547849	FALSE	Stable	3.1418	5.54988e-07	1.93731	0.000664131	0.321099	0.804238
311	chr1	36548350	36548599	FALSE	Stable	2.824	6.0484e-06	2.3616	3.48085e-05	0.429193	0.7371
312	chr1	36555800	36558399	TRUE	Stable	4.8058	9.95433e-14	4.86129	2.1211e-16	0.302418	0.816462
313	chr1	36558500	36558649	TRUE	other	0.817373	0.184064	2.44088	1.90156e-05	-0.0699619	0.962262
314	chr1	36559650	36559899	FALSE	other	2.99776	1.67408e-06	0.594716	0.299801	1.05293	0.225884
315	chr1	36575950	36576099	FALSE	Stable	2.62975	2.37468e-05	2.1118	0.000209431	0.490263	0.697082
316	chr1	36580350	36581149	FALSE	Stable	2.46273	7.25837e-05	2.65078	3.59179e-06	0.0533144	0.972516
317	chr1	36584850	36584949	FALSE	Stable	2.6152	2.61718e-05	1.15124	0.0432352	0.451519	0.72396
318	chr1	36586000	36586399	FALSE	Stable	3.2669	2.06061e-07	2.41992	2.23201e-05	0.640398	0.581384
319	chr1	36586850	36587199	FALSE	Stable	3.1337	5.93287e-07	2.07966	0.000260829	0.435884	0.733544
320	chr1	36588600	36588799	TRUE	Stable	2.56643	3.64971e-05	2.16374	0.00014608	0.369479	0.775135
321	chr1	36588850	36589199	TRUE	Stable	2.56474	3.69375e-05	3.18593	3.16808e-08	-0.0717546	0.961354
322	chr1	36589400	36589699	FALSE	Stable	3.57866	1.55523e-08	2.26005	7.37983e-05	0.86796	0.373701
323	chr1	36589850	36589949	FALSE	other	1.84085	0.00283302	-0.158929	0.785337	0.795289	0.441017
324	chr1	36673500	36673599	FALSE	Stable	3.32983	1.23609e-07	1.20984	0.0336078	1.10755	0.191387
325	chr1	36691150	36691349	TRUE	Stable	2.91353	3.15e-06	1.78501	0.00170339	-0.485445	0.700562
326	chr1	36691650	36691999	TRUE	Stable	2.66308	1.89043e-05	2.19224	0.000119611	0.433485	0.734571
327	chr1	36709400	36709999	TRUE	Stable	4.03945	2.41354e-10	3.20552	2.63895e-08	0.381321	0.767655
328	chr1	36723250	36723999	TRUE	Stable	3.00432	1.59473e-06	2.77136	1.31433e-06	0.0875977	0.95192
329	chr1	36724050	36724749	TRUE	Stable	3.97621	4.38525e-10	2.39561	2.68751e-05	0.350393	0.786455
330	chr1	36724850	36725049	FALSE	other	1.00327	0.102852	3.74811	1.11309e-10	-0.173802	0.899876
331	chr1	36860250	36860749	FALSE	Stable	2.99043	1.77249e-06	2.15377	0.000156568	-0.074269	0.960026
332	chr1	36861150	36861499	FALSE	Stable	2.4156	9.8376e-05	2.56237	7.348e-06	0.0100016	0.99448
333	chr1	36861950	36862199	FALSE	Stable	3.06518	1.00437e-06	2.211	0.000104793	0.0862367	0.952854
334	chr1	36937050	36937349	FALSE	other	2.89896	3.50371e-06	0.277494	0.632282	1.36669	0.0728571
335	chr1	36938200	36938349	TRUE	Stable	3.43503	5.23642e-08	1.12399	0.0484886	0.697068	0.53106
336	chr1	36938600	36940299	FALSE	Stable	4.55719	1.37373e-12	4.22617	5.1673e-13	0.468121	0.713303
337	chr1	37028850	37029049	FALSE	Stable	1.77292	0.00402322	2.32544	4.56097e-05	-9.61779e-05	0.999854
338	chr1	37045200	37045299	FALSE	Stable	2.33805	0.000160869	3.06872	9.44009e-08	-0.169266	0.902737
339	chr1	37045350	37045499	FALSE	Stable	1.99833	0.00120961	1.3665	0.0163424	0.334762	0.795268
340	chr1	37045850	37046399	FALSE	Stable	2.34121	0.000157968	3.21129	2.50223e-08	0.232379	0.861983
341	chr1	37053700	37053849	FALSE	Stable	2.29892	0.000205921	2.0571	0.000304065	-0.770616	0.462736
342	chr1	37098100	37098249	FALSE	Stable	1.89023	0.00218227	2.10274	0.000222779	0.757011	0.475136
343	chr1	37122050	37122299	FALSE	HH_dep	3.42857	5.52419e-08	0.520671	0.365035	1.65313	0.0182965
344	chr1	37122400	37122499	FALSE	other	1.60457	0.0091484	0.463088	0.421386	1.10689	0.191865
345	chr1	37122550	37123649	FALSE	Stable	3.84296	1.50289e-09	1.806	0.00150345	1.41465	0.0589072
346	chr1	37300000	37300099	FALSE	other	-0.609483	0.322587	2.84043	7.23242e-07	-0.878873	0.364048
347	chr1	37429950	37430099	TRUE	Stable	3.00951	1.53293e-06	1.93573	0.000670923	0.305844	0.813909
348	chr1	37430200	37430499	TRUE	Stable	3.0037	1.6021e-06	2.38285	2.96768e-05	0.261996	0.840778
349	chr1	37504400	37504599	FALSE	other	2.70584	1.40207e-05	0.897933	0.115666	0.457792	0.719786
350	chr1	37697700	37698049	FALSE	Stable	2.958	2.26119e-06	2.79372	1.08037e-06	0.393546	0.759799
351	chr1	37698650	37699499	FALSE	Stable	3.26955	2.02433e-07	2.16687	0.000142926	0.676908	0.549664
352	chr1	37864600	37864899	TRUE	Stable	2.13415	0.000557053	1.2389	0.0295576	0.272945	0.834038
353	chr1	37872400	37872649	FALSE	Stable	3.15531	4.99826e-07	1.18303	0.0377454	0.524417	0.674244
354	chr1	37872700	37873099	FALSE	Stable	2.43987	8.40412e-05	3.70602	1.73939e-10	0.514441	0.680835
355	chr1	37889900	37890099	FALSE	Stable	3.84509	1.47604e-09	1.92894	0.000701163	0.31463	0.808179
356	chr1	37996550	37997349	TRUE	Stable	4.38203	8.40787e-12	3.41047	3.60138e-09	0.348423	0.787902
357	chr1	37997450	37997899	TRUE	Stable	3.22802	2.80775e-07	2.88426	4.95149e-07	0.628956	0.591528
358	chr1	37998050	37998699	FALSE	Stable	3.45409	4.47265e-08	3.13434	5.12824e-08	0.453123	0.722953
359	chr1	38129000	38129749	TRUE	Stable	3.22277	2.933e-07	3.8956	2.22573e-11	0.406552	0.750871
360	chr1	38129900	38130399	TRUE	Stable	2.41635	9.79967e-05	2.99824	1.79407e-07	0.25671	0.844197
361	chr1	38216600	38216849	FALSE	Stable	3.42181	5.85309e-08	2.82832	8.04108e-07	0.565805	0.64362
362	chr1	38217000	38217749	FALSE	Stable	3.20921	3.2734e-07	3.59347	5.6651e-10	0.259339	0.842315
363	chr1	38217800	38218599	FALSE	Stable	3.24454	2.46156e-07	2.22919	9.21019e-05	0.211448	0.876108
364	chr1	38256650	38256799	FALSE	other	2.62049	2.52488e-05	-0.251993	0.664932	0.530703	0.669834
365	chr1	38268100	38268249	FALSE	Stable	2.41262	0.000100004	2.46856	1.53808e-05	-1.06839	0.215874
366	chr1	38393250	38393349	FALSE	other	3.27544	1.92669e-07	0.568334	0.322238	0.688496	0.539496
367	chr1	38393950	38394349	FALSE	other	2.98465	1.8511e-06	1.01281	0.0756161	0.350384	0.786455
368	chr1	38394650	38394749	FALSE	Stable	2.33429	0.000164782	2.80042	1.02062e-06	0.508906	0.684018
369	chr1	38394800	38395299	FALSE	Stable	3.88912	9.85112e-10	1.98318	0.000495422	0.546964	0.658501
370	chr1	38395600	38396099	FALSE	Stable	3.71494	4.74978e-09	1.95126	0.00060767	0.72946	0.501863
371	chr1	38399500	38399649	FALSE	Stable	2.4716	6.83476e-05	2.52638	9.74053e-06	-0.0755594	0.958965
372	chr1	38417250	38417399	FALSE	Stable	3.01272	1.49462e-06	2.47833	1.42572e-05	0.513617	0.681203
373	chr1	38417700	38418199	FALSE	Stable	3.26012	2.17668e-07	2.29182	5.8356e-05	0.255169	0.845107
374	chr1	38435600	38436749	FALSE	Stable	3.587	1.45209e-08	2.88182	5.0593e-07	0.74853	0.48328
375	chr1	38436900	38437299	FALSE	Stable	2.67797	1.7008e-05	1.96166	0.00056898	1.09398	0.199891
376	chr1	38437350	38437849	FALSE	Stable	2.31696	0.000183944	2.71385	2.1282e-06	0.665786	0.55921
377	chr1	38438500	38439899	FALSE	Stable	3.21863	3.03098e-07	2.12865	0.000186823	0.635127	0.58582
378	chr1	38440050	38440149	FALSE	Stable	1.71874	0.00527363	1.83776	0.00124048	0.266932	0.837966
379	chr1	38441300	38441549	FALSE	other	2.97161	2.04171e-06	0.634585	0.268246	0.50008	0.690167
380	chr1	38496400	38497499	FALSE	Stable	3.72008	4.53292e-09	2.3077	5.19886e-05	1.2373	0.121122
381	chr1	38497600	38498349	FALSE	Stable	3.14248	5.52267e-07	3.2198	2.30022e-08	0.76128	0.47105
382	chr1	38498950	38499049	FALSE	Stable	2.65637	1.97396e-05	2.32525	4.56644e-05	1.32278	0.0877879
383	chr1	38502450	38502799	FALSE	other	2.81035	6.66989e-06	1.07887	0.0582903	0.699685	0.528443
384	chr1	38508500	38514249	TRUE	Stable	4.55849	1.3587e-12	4.09876	2.26772e-12	0.215586	0.873728
385	chr1	38514450	38514699	FALSE	Stable	1.87748	0.00233742	3.58132	6.39367e-10	0.727966	0.503201
386	chr1	38563050	38563199	FALSE	other	1.70763	0.00556771	0.194763	0.737922	0.90301	0.343769
387	chr1	38602400	38602549	FALSE	other	3.14827	5.26903e-07	0.87537	0.125245	-0.332728	0.797001
388	chr1	38603500	38603649	FALSE	other	2.66398	1.87884e-05	0.727759	0.203241	0.586103	0.627449
389	chr1	38604800	38604899	FALSE	Stable	3.19935	3.52526e-07	1.39349	0.0143374	0.793426	0.442381
390	chr1	38605950	38607899	TRUE	Stable	4.12335	1.08072e-10	3.75423	1.04239e-10	-0.0226017	0.988054
391	chr1	38607950	38608499	FALSE	Stable	4.65593	4.95436e-13	1.70278	0.00275793	-0.0784179	0.95723
392	chr1	38626200	38627449	FALSE	Stable	4.48067	3.05155e-12	4.22772	5.07643e-13	0.283874	0.827033
393	chr1	38627550	38629949	FALSE	Stable	5.16172	2.11179e-15	4.25422	3.70923e-13	0.183452	0.893823
394	chr1	38630000	38630299	FALSE	Stable	4.14091	9.05206e-11	2.39423	2.71721e-05	0.71972	0.510673
395	chr1	38630550	38633049	TRUE	Stable	4.23898	3.54448e-11	3.73013	1.34757e-10	0.235638	0.859802
396	chr1	38633150	38633849	FALSE	Stable	2.98657	1.82309e-06	2.42982	2.07412e-05	0.357079	0.782728
397	chr1	38634050	38634199	FALSE	Stable	1.83329	0.0029449	1.32121	0.0202797	0.254508	0.845788
398	chr1	38634300	38634449	FALSE	Stable	1.84687	0.00274401	4.25184	3.81724e-13	-0.0964125	0.946057
399	chr1	38634500	38634599	FALSE	Stable	2.45143	7.79389e-05	1.33041	0.0194047	0.511158	0.682709
400	chr1	38635100	38635499	FALSE	Stable	2.26761	0.000249846	3.04794	1.14136e-07	0.0329661	0.98374
401	chr1	38636500	38636899	FALSE	Stable	4.23988	3.51178e-11	3.03743	1.25664e-07	-0.0523247	0.973168
402	chr1	38637150	38637249	FALSE	Stable	2.60325	2.83996e-05	1.18495	0.0374417	1.39753	0.0632906
403	chr1	38642350	38642699	FALSE	Stable	2.1874	0.000405193	2.12126	0.000196156	0.392594	0.760322
404	chr1	38642900	38643199	FALSE	Stable	4.11219	1.19963e-10	1.30069	0.0223045	0.611205	0.606551
405	chr1	38652700	38652849	FALSE	Stable	2.15291	0.000497095	2.20609	0.000108531	-0.080866	0.956037
406	chr1	38658300	38658749	FALSE	Stable	2.06047	0.000852357	3.10971	6.46152e-08	-0.235954	0.859542
407	chr1	38658800	38659549	FALSE	Stable	3.32695	1.26544e-07	3.22058	2.28413e-08	-0.390222	0.762038
408	chr1	38659850	38660099	FALSE	Stable	1.73474	0.00486648	2.65461	3.47946e-06	-0.304244	0.815009
409	chr1	38660150	38661499	FALSE	Stable	3.29005	1.71286e-07	3.66296	2.7599e-10	-0.292367	0.822919
410	chr1	38661550	38661649	FALSE	Stable	1.59773	0.0094474	1.54888	0.00646749	-0.56931	0.641005
411	chr1	38661750	38662399	FALSE	Stable	2.33049	0.000168789	3.29832	1.08433e-08	-0.266576	0.837966
412	chr1	38688550	38688649	FALSE	Stable	2.12261	0.000593286	2.42051	2.22191e-05	-0.318678	0.805509
413	chr1	38700550	38700799	FALSE	Stable	3.89859	8.99027e-10	1.12134	0.0490035	0.758632	0.473457
414	chr1	38755200	38755299	FALSE	HH_dep	3.4071	6.58774e-08	0.100278	0.863694	2.29439	0.000229046
415	chr1	38755800	38756049	FALSE	other	2.49809	5.74551e-05	0.936095	0.100862	1.26493	0.109429
416	chr1	38756300	38758049	TRUE	HH_sens	4.11102	1.2122e-10	1.81004	0.00146669	2.13515	0.000806129
417	chr1	38758100	38759749	TRUE	HH_sens	4.32778	1.45826e-11	2.49802	1.22221e-05	1.88272	0.00456733
418	chr1	38759900	38760549	TRUE	Stable	3.55526	1.90282e-08	2.74293	1.66484e-06	1.35878	0.0753817
419	chr1	38760800	38761549	TRUE	Stable	3.45929	4.27642e-08	2.68487	2.71251e-06	1.23847	0.120713
420	chr1	38763200	38763449	FALSE	other	3.07051	9.62198e-07	1.00642	0.0774994	1.03714	0.237892
421	chr1	38764500	38764799	FALSE	Stable	1.9675	0.00143882	3.0271	1.37858e-07	0.493949	0.694479
422	chr1	38764950	38765249	FALSE	other	2.99135	1.76087e-06	1.02968	0.0708368	1.24854	0.11629
423	chr1	38765300	38765499	FALSE	Stable	2.57613	3.4169e-05	2.88519	4.90972e-07	0.987073	0.275343
424	chr1	38765600	38765999	FALSE	other	4.22569	4.06249e-11	0.645795	0.259674	1.0896	0.202824
425	chr1	38766200	38767899	FALSE	Stable	3.72943	4.16586e-09	3.50699	1.37044e-09	0.556737	0.650439
426	chr1	38768600	38768799	FALSE	other	2.36578	0.000135104	0.921388	0.106315	0.676454	0.550157
427	chr1	38770400	38770699	FALSE	Stable	2.54791	4.15368e-05	2.84849	6.76111e-07	0.995548	0.267916
428	chr1	38893350	38893449	FALSE	Stable	2.7746	8.64833e-06	1.44474	0.0111012	0.317426	0.806471
429	chr1	38986850	38987599	FALSE	Stable	3.55302	1.94004e-08	4.39025	7.57153e-14	-0.237359	0.858675
430	chr1	38987750	38988399	FALSE	Stable	3.05031	1.13091e-06	4.05412	3.811e-12	-0.147406	0.915101
431	chr1	39106200	39106349	FALSE	Stable	1.60744	0.00902206	1.7379	0.00224999	0.844581	0.395725
432	chr1	39107550	39107649	FALSE	other	-0.347008	0.574972	2.10573	0.000218294	-1.15661	0.162061
433	chr1	39367400	39367649	FALSE	Stable	2.48533	6.26405e-05	2.27658	6.5274e-05	0.438011	0.73246
434	chr1	39367750	39369149	FALSE	Stable	4.2499	3.18518e-11	3.93919	1.37814e-11	0.546876	0.658501
435	chr1	39478900	39479249	FALSE	other	3.54228	2.12635e-08	0.657929	0.250942	0.684056	0.543963
436	chr1	39535750	39536199	TRUE	Stable	3.77071	2.88434e-09	2.7438	1.65248e-06	0.530315	0.670445
437	chr1	39576600	39577399	TRUE	Stable	3.74327	3.68312e-09	3.52833	1.10013e-09	0.283455	0.827033
438	chr1	39577600	39577849	TRUE	other	1.14971	0.0615996	2.59793	5.52276e-06	-0.484211	0.701491
439	chr1	39578650	39578799	FALSE	Stable	2.34013	0.000158921	2.59606	5.60436e-06	-0.276707	0.831596
440	chr1	39579200	39579349	FALSE	Stable	1.83943	0.00285225	3.56845	7.29598e-10	-0.737362	0.493781
441	chr1	39698600	39698949	FALSE	other	3.09208	8.18085e-07	0.543784	0.34382	0.347993	0.788288
442	chr1	39702100	39702199	FALSE	other	2.69929	1.46573e-05	0.72039	0.207791	-0.626727	0.593015
443	chr1	39714750	39715099	FALSE	Stable	2.63252	2.33015e-05	1.45283	0.010656	0.338556	0.792859
444	chr1	39716700	39716849	FALSE	other	0.887257	0.149249	2.42981	2.07412e-05	-0.835507	0.403516
445	chr1	39717150	39717249	FALSE	Stable	3.44028	5.01042e-08	1.30039	0.022329	-0.201891	0.88153
446	chr1	39717500	39717649	FALSE	Stable	1.74801	0.00454789	3.43928	2.71069e-09	0.296201	0.821036
447	chr1	39719750	39719849	FALSE	Stable	3.76549	3.02607e-09	2.01732	0.000395058	0.146651	0.915639
448	chr1	39720150	39721049	FALSE	Stable	4.11667	1.14947e-10	3.00235	1.73092e-07	-0.300429	0.818058
449	chr1	39734800	39734999	FALSE	Stable	1.78053	0.00386604	1.20086	0.0349391	0.22537	0.867266
450	chr1	39735350	39735649	FALSE	other	0.884388	0.150606	2.98618	1.9953e-07	-0.396431	0.758248
451	chr1	39868250	39868499	FALSE	Stable	3.30259	1.54759e-07	1.6148	0.00451907	1.06963	0.215134
452	chr1	39869050	39869199	FALSE	other	3.07209	9.51075e-07	0.407871	0.479694	1.05025	0.22802
453	chr1	39869300	39869449	FALSE	Stable	1.25964	0.0405602	3.06551	9.71657e-08	0.502698	0.688622
454	chr1	39869750	39869849	FALSE	Stable	1.90091	0.00205881	1.7379	0.00224999	0.724414	0.505893
455	chr1	39900250	39900899	TRUE	Stable	4.65263	5.1385e-13	4.09007	2.51426e-12	0.525665	0.673649
456	chr1	39901050	39902549	TRUE	Stable	4.84018	6.93521e-14	3.52786	1.10561e-09	0.436502	0.733169
457	chr1	39937250	39937399	FALSE	other	2.22775	0.000318142	0.616417	0.282379	0.843393	0.396868
458	chr1	39969700	39969849	FALSE	Stable	2.4208	9.51711e-05	1.89501	0.000867737	0.505007	0.687064
459	chr1	40242700	40243449	FALSE	Stable	2.22477	0.000324047	1.91333	0.000774239	0.104859	0.940817
460	chr1	40244200	40244449	FALSE	other	3.44728	4.73213e-08	1.07686	0.0587663	0.756461	0.475818
461	chr1	40266850	40266949	FALSE	Stable	3.02083	1.40775e-06	3.18618	3.16062e-08	-0.165355	0.905546
462	chr1	40352050	40352349	FALSE	Stable	2.74854	1.03791e-05	2.74563	1.62801e-06	-0.517143	0.678588
463	chr1	40352450	40352949	FALSE	Stable	2.72744	1.20427e-05	3.34296	7.03027e-09	-0.363245	0.779208
464	chr1	40353250	40353899	FALSE	Stable	3.17117	4.40774e-07	3.55733	8.21468e-10	-0.424474	0.740111
465	chr1	40436150	40436899	FALSE	Stable	2.68563	1.61294e-05	2.84791	6.78994e-07	-0.523418	0.674645
466	chr1	40915250	40915349	FALSE	Stable	1.85658	0.00260687	3.481	1.77814e-09	0.363048	0.779208
467	chr1	40968000	40968099	FALSE	other	1.86248	0.00252571	0.142893	0.806488	0.10562	0.940457
468	chr1	41006650	41006999	FALSE	other	3.60609	1.231e-08	0.832227	0.145153	0.042208	0.977888
469	chr1	41007200	41007349	FALSE	other	0.946726	0.123748	2.42051	2.22191e-05	0.820662	0.417916
470	chr1	41031050	41031149	FALSE	common_SHHnullhigh	1.25704	0.0409279	2.76494	1.38528e-06	-1.5079	0.0384101
471	chr1	41034800	41035799	FALSE	Stable	3.25174	2.33027e-07	3.17472	3.52578e-08	-0.0445777	0.976525
472	chr1	41035850	41036299	FALSE	Stable	2.52169	4.91209e-05	2.29161	5.8453e-05	0.0409074	0.978824
473	chr1	41271150	41271399	FALSE	Stable	3.43255	5.34211e-08	2.67429	2.95993e-06	0.73749	0.49358
474	chr1	41271550	41272299	FALSE	Stable	3.4446	4.84312e-08	3.05364	1.08325e-07	0.354068	0.784042
475	chr1	41272600	41272749	FALSE	Stable	2.26814	0.000249001	1.16404	0.0409691	0.485948	0.69998
476	chr1	41273200	41273749	FALSE	Stable	2.74831	1.03962e-05	2.69281	2.53377e-06	0.43525	0.733972
477	chr1	41274600	41274699	FALSE	Stable	3.18487	3.95495e-07	2.47833	1.42572e-05	-0.305897	0.813909
478	chr1	41274750	41274899	FALSE	Stable	1.52909	0.0129666	2.66018	3.32404e-06	-0.161578	0.907608
479	chr1	41274950	41275199	FALSE	Stable	3.53139	2.31674e-08	1.26768	0.0259596	0.645582	0.576492
480	chr1	41275300	41275799	FALSE	Stable	4.54252	1.59535e-12	2.60809	5.08722e-06	0.584316	0.629416
481	chr1	41276950	41277199	FALSE	Stable	2.88744	3.81707e-06	2.08298	0.000254919	0.776773	0.457408
482	chr1	41326250	41326349	FALSE	Stable	2.19079	0.000396803	1.7264	0.0024058	0.443617	0.728473
483	chr1	41326600	41326799	FALSE	Stable	3.67961	6.47419e-09	2.0392	0.000342124	0.038888	0.980265
484	chr1	41358350	41359099	FALSE	Stable	3.12984	6.11629e-07	3.22749	2.14101e-08	0.154622	0.911228
485	chr1	41389100	41389299	FALSE	Stable	1.53652	0.0125331	2.40811	2.44306e-05	-0.164547	0.906111
486	chr1	41389850	41390099	FALSE	Stable	1.83207	0.00296182	2.44985	1.77523e-05	0.351729	0.785644
487	chr1	41390600	41390999	FALSE	Stable	2.35827	0.000141637	2.14084	0.000171587	0.0108368	0.993955
488	chr1	41610450	41610749	FALSE	Stable	2.40813	0.000102956	2.96249	2.47048e-07	-0.264414	0.839161
489	chr1	41611350	41611799	FALSE	Stable	3.18991	3.80094e-07	1.38096	0.015238	0.287141	0.825393
490	chr1	41611950	41612149	FALSE	other	0.843922	0.170266	3.62627	4.03942e-10	-0.473785	0.709103
491	chr1	41651650	41652099	FALSE	Stable	2.81464	6.47227e-06	2.26357	7.20196e-05	0.361904	0.779961
492	chr1	41652250	41652349	FALSE	other	0.63617	0.301903	2.18186	0.000128671	-0.249567	0.849321
493	chr1	41652650	41652849	FALSE	Stable	2.86185	4.61002e-06	3.48299	1.74544e-09	0.353898	0.78423
494	chr1	41653050	41653449	FALSE	Stable	4.10759	1.25211e-10	2.85771	6.24593e-07	0.222933	0.868915
495	chr1	41896050	41896149	FALSE	other	0.836435	0.173945	0.78706	0.168448	1.62321	0.0215695
496	chr1	42065600	42065949	FALSE	other	0.671864	0.275334	3.89494	2.23761e-11	-0.430046	0.736513
497	chr1	42067300	42067399	FALSE	other	2.76318	9.34994e-06	0.0420889	0.942334	0.702477	0.526331
498	chr1	42233450	42233949	FALSE	Stable	3.43026	5.44456e-08	1.79431	0.00161253	0.431465	0.735826
499	chr1	42234150	42234499	FALSE	other	3.15236	5.109e-07	0.927122	0.104168	0.607112	0.609552
500	chr1	42235250	42235349	FALSE	other	1.92063	0.00185579	0.608736	0.28836	0.867112	0.374324
501	chr1	42235600	42236449	FALSE	Stable	3.28296	1.8158e-07	1.68198	0.00311025	0.5624	0.646217
502	chr1	42259850	42259999	FALSE	Stable	2.01137	0.00112408	1.62058	0.00437973	0.952181	0.30275
503	chr1	42261750	42262149	FALSE	Stable	2.62507	2.45383e-05	2.13544	0.000178203	0.130774	0.925334
504	chr1	42524400	42524549	FALSE	Stable	2.66105	1.91434e-05	2.84178	7.15595e-07	-0.201506	0.881825
505	chr1	42539000	42539349	FALSE	Stable	3.35846	9.85024e-08	2.26602	7.0716e-05	0.209046	0.877534
506	chr1	42539500	42540299	FALSE	Stable	3.8851	1.01985e-09	3.29009	1.17531e-08	-0.121328	0.930692
507	chr1	42540450	42541399	FALSE	Stable	3.64972	8.43458e-09	3.46188	2.15471e-09	0.248756	0.850192
508	chr1	42771800	42771899	FALSE	Stable	2.55971	3.82274e-05	1.17236	0.0395379	0.132573	0.924494
509	chr1	42851300	42851899	FALSE	Stable	3.24706	2.41616e-07	2.63141	4.21063e-06	0.470291	0.711656
510	chr1	42911050	42911299	FALSE	Stable	2.89445	3.6168e-06	1.18182	0.0379394	0.685675	0.542384
511	chr1	42953150	42953449	TRUE	Stable	2.25312	0.000272461	2.21485	0.000102031	0.267532	0.837665
512	chr1	43005550	43006099	FALSE	Stable	1.36063	0.0269777	3.89659	2.19995e-11	-0.322483	0.803331
513	chr1	43006300	43006799	FALSE	Stable	2.7206	1.26466e-05	2.57498	6.65641e-06	-0.475295	0.708327
514	chr1	43009800	43009999	FALSE	Stable	1.28757	0.0363781	2.52728	9.68181e-06	-1.01045	0.256575
515	chr1	43010400	43011099	FALSE	Stable	2.11736	0.000612057	3.16095	4.00999e-08	-0.791318	0.444299
516	chr1	43011250	43011499	FALSE	Stable	1.67191	0.00664021	3.00678	1.66492e-07	-0.948919	0.305346
517	chr1	43044900	43045649	FALSE	Stable	3.08271	8.76244e-07	3.77712	8.13103e-11	-0.410806	0.748692
518	chr1	43045900	43046799	FALSE	Stable	2.24957	0.000278524	3.36825	5.48096e-09	-0.835075	0.403837
519	chr1	43097900	43099499	TRUE	Stable	4.5241	1.93339e-12	3.55566	8.36299e-10	0.233325	0.861266
520	chr1	43164400	43164499	FALSE	Stable	1.86673	0.00246978	2.00698	0.000423439	-0.750109	0.481717
521	chr1	43189050	43189149	FALSE	Stable	3.0618	1.03185e-06	2.92682	3.39878e-07	0.696378	0.531677
522	chr1	43224650	43225099	FALSE	other	0.923572	0.133285	2.94644	2.85661e-07	0.0606223	0.967901
523	chr1	43225400	43225549	FALSE	Stable	1.51215	0.0139993	2.50749	1.13293e-05	-1.02303	0.247925
524	chr1	43311100	43311199	FALSE	Stable	2.4564	7.5582e-05	2.70088	2.37217e-06	0.316913	0.806887
525	chr1	43311300	43311549	FALSE	Stable	2.2398	0.0002957	2.26787	6.97728e-05	-0.0636496	0.965601
526	chr1	43398300	43398499	FALSE	Stable	2.99776	1.67408e-06	1.93344	0.000681033	0.0373713	0.981183
527	chr1	43398550	43398999	FALSE	Stable	2.2894	0.000218872	4.19889	7.07196e-13	0.522304	0.675246
528	chr1	43399600	43399899	FALSE	Stable	2.90782	3.28388e-06	2.36087	3.50006e-05	-0.0711978	0.961701
529	chr1	43400000	43400349	FALSE	Stable	3.26063	2.16768e-07	2.93758	3.09507e-07	-0.0312556	0.984562
530	chr1	43401100	43401499	FALSE	Stable	3.06736	9.87204e-07	2.54918	8.16201e-06	-0.255023	0.845155
531	chr1	43410250	43410349	FALSE	HH_dep	2.36614	0.000134922	0.365235	0.527498	2.0009	0.00205929
532	chr1	43444600	43446949	TRUE	Stable	4.42925	5.17657e-12	3.65286	3.07386e-10	0.628993	0.591497
533	chr1	43591350	43591449	FALSE	Stable	3.3552	1.01059e-07	2.63302	4.15533e-06	0.722178	0.508485
534	chr1	43591650	43591799	FALSE	other	2.70584	1.40207e-05	-0.141246	0.80864	0.817052	0.420419
535	chr1	43827100	43827749	TRUE	Stable	3.39811	7.08053e-08	2.5871	6.04132e-06	0.772963	0.460271
536	chr1	43933050	43934749	FALSE	Stable	3.83921	1.55375e-09	4.02098	5.51498e-12	0.456563	0.720429
537	chr1	44101550	44101749	FALSE	other	3.12937	6.13649e-07	0.650159	0.256493	1.1291	0.177932
538	chr1	44101850	44102449	TRUE	Stable	3.88485	1.022e-09	2.59059	5.87014e-06	0.449266	0.725585
539	chr1	44102500	44103099	TRUE	Stable	3.36245	9.54039e-08	2.93909	3.0528e-07	0.610765	0.607076
540	chr1	44117750	44118049	FALSE	Stable	2.79726	7.33146e-06	2.00012	0.000443174	0.352358	0.785264
541	chr1	44118250	44118849	FALSE	Stable	2.38248	0.000121528	2.108	0.000215084	0.787931	0.447242
542	chr1	44118900	44120199	FALSE	Stable	3.31106	1.44494e-07	3.45773	2.25103e-09	0.201742	0.881685
543	chr1	44147150	44148599	TRUE	Stable	3.08616	8.54831e-07	3.15339	4.3031e-08	0.477622	0.706757
544	chr1	44394950	44395499	FALSE	Stable	4.08377	1.57175e-10	2.54209	8.62765e-06	0.773743	0.459919
545	chr1	44396100	44396299	FALSE	other	2.92265	2.94141e-06	0.861326	0.13147	1.29338	0.0986935
546	chr1	44551100	44554199	TRUE	Stable	4.46062	3.75383e-12	3.98159	8.56166e-12	0.478202	0.706362
547	chr1	44591700	44591999	FALSE	other	4.19541	5.39373e-11	-0.399087	0.48941	1.40254	0.0617891
548	chr1	44613550	44613649	FALSE	Stable	2.2588	0.000263869	1.28537	0.0239306	0.952654	0.30265
549	chr1	44618100	44618299	FALSE	Stable	2.30838	0.000193777	1.27235	0.0253926	0.738962	0.492477
550	chr1	44618550	44619649	FALSE	Stable	3.19701	3.5904e-07	2.96948	2.32308e-07	0.411676	0.747847
551	chr1	44674400	44674549	FALSE	Stable	2.97458	1.99461e-06	1.20939	0.0336562	0.163675	0.906338
552	chr1	44677550	44677699	FALSE	Stable	2.98285	1.87598e-06	1.22277	0.0317593	0.505312	0.686775
553	chr1	44677850	44680849	TRUE	Stable	4.49671	2.57921e-12	4.32455	1.63649e-13	0.131699	0.92499
554	chr1	44680950	44681349	FALSE	Stable	3.13155	6.03942e-07	2.53866	8.8674e-06	-0.0252644	0.986917
555	chr1	44681950	44682049	FALSE	other	2.45381	7.67435e-05	1.11562	0.0501728	-0.680428	0.546823
556	chr1	44682600	44682699	FALSE	other	0.172937	0.78043	2.93193	3.25049e-07	-1.18516	0.146262
557	chr1	44720550	44720649	FALSE	other	0.41752	0.498926	1.53483	0.00696784	-0.142276	0.918543
558	chr1	44720800	44720999	FALSE	Stable	3.076	9.24412e-07	2.71807	2.05359e-06	0.743882	0.488056
559	chr1	44721250	44722299	FALSE	Stable	3.9523	5.50337e-10	2.7335	1.80284e-06	0.307869	0.812531
560	chr1	44740150	44740299	FALSE	other	0.466827	0.449585	2.32525	4.56644e-05	-0.284591	0.826855
561	chr1	44746050	44746749	FALSE	Stable	3.34672	1.08234e-07	2.95101	2.73672e-07	-0.31742	0.806471
562	chr1	44747750	44747899	FALSE	Stable	1.62882	0.00816599	3.12837	5.42043e-08	-0.507881	0.684841
563	chr1	44750700	44750849	FALSE	Stable	1.81354	0.00326059	1.75833	0.00199736	0.345156	0.789289
564	chr1	44751100	44751199	FALSE	Stable	2.66398	1.87884e-05	1.1694	0.0400404	0.467625	0.713468
565	chr1	44751450	44752449	FALSE	Stable	2.71726	1.2957e-05	3.50816	1.35286e-09	0.17128	0.901416
566	chr1	44824800	44825049	FALSE	Stable	3.61114	1.17881e-08	1.12134	0.0490035	0.471183	0.710815
567	chr1	44825600	44825699	FALSE	other	2.70295	1.42892e-05	0.754966	0.186759	0.916191	0.332664
568	chr1	44848250	44848449	FALSE	Stable	2.50618	5.45348e-05	2.20609	0.000108531	0.272401	0.834358
569	chr1	44848800	44849399	FALSE	Stable	3.9149	7.77994e-10	2.61063	4.9817e-06	1.27313	0.106344
570	chr1	44849650	44851199	FALSE	Stable	4.50971	2.24974e-12	2.86107	6.06115e-07	0.523233	0.674754
571	chr1	44877500	44877699	FALSE	Stable	2.35648	0.000143264	2.19008	0.000121451	0.456351	0.720656
572	chr1	44877950	44879649	TRUE	Stable	4.88305	4.44786e-14	3.48824	1.65595e-09	1.27321	0.106321
573	chr1	44879800	44879949	FALSE	other	3.08812	8.41964e-07	0.594716	0.299801	1.14329	0.169749
574	chr1	44891350	44891599	FALSE	Stable	3.68096	6.40156e-09	1.34071	0.0184958	-0.00152164	0.999004
575	chr1	44891650	44892299	FALSE	Stable	2.96483	2.15181e-06	3.51209	1.29799e-09	0.00516391	0.997201
576	chr1	44892800	44893149	FALSE	Stable	1.6472	0.00747349	2.32307	4.64012e-05	-0.289917	0.823676
577	chr1	44939850	44939949	FALSE	other	0.767493	0.212355	1.06986	0.0604365	-1.32932	0.0853643
578	chr1	44940050	44940349	FALSE	Stable	2.7328	1.15879e-05	2.40413	2.51656e-05	-0.698278	0.529902
579	chr1	44940550	44940749	FALSE	Stable	3.10846	7.1972e-07	2.06552	0.000287194	0.0159863	0.991081
580	chr1	44941000	44941549	FALSE	Stable	2.24923	0.000279115	3.28234	1.26898e-08	-0.326073	0.800984
581	chr1	45020950	45021299	FALSE	Stable	2.66883	1.81686e-05	2.15626	0.000153789	0.48488	0.700958
582	chr1	45031250	45031349	FALSE	Stable	1.6614	0.00698198	2.99193	1.89386e-07	0.65694	0.566654
583	chr1	45032000	45032299	FALSE	Stable	3.9049	8.5062e-10	1.33497	0.0190069	0.968406	0.289301
584	chr1	45113700	45113899	FALSE	Stable	2.00274	0.0011802	1.64446	0.00383444	-0.259876	0.842001
585	chr1	45114050	45114299	FALSE	Stable	3.28108	1.84312e-07	2.19419	0.000118019	0.0599312	0.968456
586	chr1	45114500	45114749	FALSE	Stable	2.86343	4.55378e-06	4.21508	5.85967e-13	-0.35999	0.781168
587	chr1	45115250	45115349	FALSE	Stable	2.12438	0.000588631	2.22727	9.33812e-05	-0.123668	0.929573
588	chr1	45115650	45118299	FALSE	Stable	3.88713	1.0023e-09	4.25832	3.54287e-13	-0.0766136	0.958415
589	chr1	45118550	45118699	FALSE	Stable	2.501	5.64216e-05	3.7403	1.21001e-10	0.33453	0.795416
590	chr1	45287750	45288099	FALSE	other	3.32321	1.30535e-07	0.9195	0.107039	1.14894	0.166366
591	chr1	45288300	45288799	FALSE	Stable	4.51217	2.18839e-12	1.50027	0.00835996	0.981877	0.279236
592	chr1	45310750	45311099	FALSE	Stable	2.77666	8.52372e-06	2.78806	1.13427e-06	0.374546	0.772264
593	chr1	45311200	45313049	FALSE	Stable	4.81423	9.14519e-14	5.11017	7.7281e-18	0.188391	0.890466
594	chr1	45313200	45314149	FALSE	Stable	4.18979	5.68129e-11	4.49815	2.01404e-14	0.432664	0.735159
595	chr1	45314700	45314949	FALSE	Stable	3.28034	1.85444e-07	2.66018	3.32404e-06	0.0103034	0.994228
596	chr1	45315900	45315999	FALSE	other	2.09432	0.000700158	0.97332	0.0879041	0.0940465	0.947656
597	chr1	45319800	45320249	FALSE	Stable	2.57168	3.51751e-05	3.86906	2.98393e-11	-0.590329	0.623265
598	chr1	45320450	45320899	FALSE	Stable	3.54051	2.16118e-08	5.11943	6.76039e-18	-0.00508214	0.997248
599	chr1	45321250	45321499	FALSE	Stable	1.83269	0.00295374	3.31744	8.97508e-09	0.0738531	0.960268
600	chr1	45385850	45386499	FALSE	Stable	3.50651	2.87282e-08	2.49607	1.24139e-05	0.237237	0.858769
601	chr1	45459900	45460099	FALSE	Stable	2.09799	0.000685838	2.76826	1.34918e-06	-1.28012	0.103609
602	chr1	45460400	45460849	FALSE	Stable	2.6742	1.74845e-05	2.75537	1.50013e-06	-0.116746	0.933047
603	chr1	45460950	45461849	FALSE	Stable	4.95081	2.17574e-14	2.54643	8.33208e-06	-0.0859169	0.952952
604	chr1	45461950	45462099	FALSE	other	2.85839	4.72071e-06	0.732331	0.200429	0.52454	0.674223
605	chr1	45501150	45501299	FALSE	Stable	2.49809	5.74551e-05	2.76219	1.41556e-06	-0.284884	0.82673
606	chr1	45501350	45503699	FALSE	Stable	4.17084	6.8428e-11	3.89126	2.329e-11	0.348767	0.78766
607	chr1	45587650	45587749	FALSE	Stable	2.04828	0.000914093	1.40851	0.0133155	-0.387182	0.763603
608	chr1	45588300	45588599	FALSE	Stable	2.65101	2.04571e-05	3.28591	1.22475e-08	-0.0735018	0.960496
609	chr1	45600600	45600699	FALSE	HH_dep	3.12404	6.37917e-07	0.100278	0.863694	2.01133	0.0019072
610	chr1	45672050	45675949	FALSE	Stable	3.84652	1.45754e-09	3.99786	7.13622e-12	-0.0296225	0.985397
611	chr1	45676200	45676399	FALSE	Stable	2.23048	0.000313008	3.90132	2.09479e-11	-0.0970113	0.94573
612	chr1	45676550	45676999	FALSE	Stable	3.78545	2.51577e-09	1.95982	0.000575248	-0.0113175	0.993713
613	chr1	45703350	45703449	FALSE	other	0.559271	0.364548	2.825	8.24905e-07	-1.27407	0.106062
614	chr1	45760000	45762499	FALSE	Stable	4.0416	2.36715e-10	4.97092	5.04156e-17	-0.0587381	0.969214
615	chr1	45762800	45763149	FALSE	Stable	1.35368	0.0277693	3.09331	7.5302e-08	-0.54812	0.657371
616	chr1	45764050	45764499	FALSE	other	0.877133	0.154015	2.6985	2.41655e-06	-0.478131	0.706362
617	chr1	45764800	45768249	FALSE	Stable	4.26603	2.70556e-11	3.9025	2.07291e-11	-0.0474578	0.975258
618	chr1	45794800	45796099	FALSE	Stable	4.75336	1.69184e-13	3.59758	5.44377e-10	0.41585	0.745806
619	chr1	45860050	45860549	FALSE	Stable	2.47785	6.56874e-05	2.28191	6.27322e-05	-0.032722	0.983841
620	chr1	45864350	45864699	FALSE	other	1.00537	0.10214	2.63825	3.98456e-06	-0.668879	0.5569
621	chr1	45864750	45865349	FALSE	Stable	2.09499	0.00069813	4.08855	2.55439e-12	-0.327162	0.800493
622	chr1	45865550	45866449	FALSE	Stable	2.98745	1.81251e-06	3.418	3.33248e-09	-0.194383	0.886933
623	chr1	45866500	45867399	FALSE	Stable	3.58331	1.49488e-08	3.075	8.93102e-08	-0.193449	0.887239
624	chr1	45867650	45867799	FALSE	Stable	2.81139	6.62363e-06	1.56603	0.00590307	0.21356	0.875026
625	chr1	45868750	45868899	FALSE	Stable	1.48781	0.0156286	2.30923	5.1379e-05	-0.435464	0.733777
626	chr1	46066300	46067399	TRUE	Stable	4.30242	1.87219e-11	3.39987	4.00537e-09	0.126722	0.92751
627	chr1	46278700	46278849	FALSE	other	1.19498	0.0520305	3.34928	6.60185e-09	-0.166827	0.904782
628	chr1	46279050	46279199	FALSE	Stable	3.39799	7.08053e-08	2.04567	0.000327862	0.339887	0.792296
629	chr1	46417350	46417449	FALSE	Stable	3.5852	1.46987e-08	2.90745	4.0297e-07	0.677751	0.549153
630	chr1	46417600	46417749	FALSE	other	3.26896	2.03085e-07	0.861833	0.13125	0.388517	0.762942
631	chr1	46812800	46812949	FALSE	other	0.565194	0.359477	1.82799	0.00131532	-0.7014	0.526906
632	chr1	46823800	46823949	FALSE	other	3.26896	2.03085e-07	0.813825	0.154315	0.853619	0.386032
633	chr1	46828800	46831999	FALSE	Stable	4.58585	1.02517e-12	3.39947	4.0205e-09	0.508665	0.684355
634	chr1	46832250	46832349	FALSE	Stable	1.81955	0.00316094	1.96053	0.000572663	0.834057	0.404613
635	chr1	46838400	46838699	FALSE	other	3.94074	6.10479e-10	0.452935	0.431871	0.466116	0.713901
636	chr1	46851150	46851599	FALSE	Stable	2.69917	1.46698e-05	2.79744	1.04656e-06	0.130986	0.925282
637	chr1	46851750	46852049	FALSE	Stable	2.81881	6.28249e-06	2.29484	5.70696e-05	0.169673	0.902398
638	chr1	46852300	46854449	TRUE	Stable	4.66607	4.43013e-13	4.36294	1.0317e-13	0.519734	0.676715
639	chr1	46854500	46854699	TRUE	Stable	2.56512	3.68418e-05	2.35747	3.58846e-05	0.436911	0.732914
640	chr1	46887400	46887599	FALSE	Stable	1.76378	0.00420705	3.66632	2.66357e-10	-0.910876	0.336834
641	chr1	46887850	46887949	FALSE	Stable	2.97458	1.99461e-06	1.68699	0.00302066	0.275162	0.832422
642	chr1	46888250	46888349	FALSE	Stable	3.26896	2.03085e-07	1.53483	0.00696784	0.721695	0.508892
643	chr1	46888450	46888599	FALSE	Stable	1.66056	0.0070068	1.99259	0.000465771	0.0539146	0.971939
644	chr1	47039400	47039799	FALSE	Stable	2.01504	0.00110131	2.62	4.61626e-06	0.0963011	0.94618
645	chr1	47073150	47073249	FALSE	Stable	1.26895	0.0390951	3.43928	2.71069e-09	-0.596495	0.618452
646	chr1	47103050	47103299	FALSE	Stable	2.17966	0.000424482	3.34859	6.64025e-09	-0.193895	0.887102
647	chr1	47103900	47104199	FALSE	Stable	3.93391	6.50136e-10	2.62753	4.3433e-06	0.279428	0.829467
648	chr1	47104950	47105049	FALSE	Stable	2.02614	0.00103403	2.34816	3.84534e-05	-0.3428	0.79045
649	chr1	47164200	47164399	FALSE	other	3.53758	2.20965e-08	0.359797	0.533934	1.15917	0.160551
650	chr1	47167150	47167249	FALSE	other	2.69929	1.46573e-05	0.945422	0.0974577	0.741435	0.490749
651	chr1	47379050	47379199	FALSE	other	1.81333	0.00326252	0.153651	0.792499	0.891737	0.352914
652	chr1	47431800	47431949	FALSE	HH_dep	3.59537	1.35119e-08	1.05148	0.0650624	2.54389	2.81151e-05
653	chr1	47432150	47432749	FALSE	HH_sens	3.89207	9.56534e-10	2.01925	0.000390114	1.51852	0.0363601
654	chr1	47433200	47433949	FALSE	Stable	3.21695	3.07342e-07	1.8109	0.00145885	1.2426	0.119172
655	chr1	47434150	47434299	FALSE	other	3.35899	9.81085e-08	0.942703	0.0984152	1.40385	0.0615753
656	chr1	47435200	47435399	FALSE	Stable	2.50065	5.65357e-05	1.55622	0.00622377	0.590134	0.623294
657	chr1	47436200	47436349	FALSE	Stable	1.75599	0.00437158	2.7553	1.50013e-06	0.574528	0.636876
658	chr1	47436400	47436599	FALSE	other	2.3138	0.00018745	0.954355	0.0943113	0.914661	0.334055
659	chr1	47473450	47473599	FALSE	HH_dep	2.10255	0.000667673	-0.989855	0.0826692	1.47844	0.0441129
660	chr1	47491850	47491999	FALSE	Stable	3.40592	6.64066e-08	2.20336	0.000110677	0.190123	0.889728
661	chr1	47492050	47492249	FALSE	Stable	1.45076	0.0183705	2.90987	3.94736e-07	-0.162982	0.906609
662	chr1	48155200	48155349	FALSE	Stable	2.97111	2.04908e-06	2.56223	7.35072e-06	0.408881	0.749689
663	chr1	48155750	48156049	FALSE	Stable	2.44323	8.22099e-05	3.10604	6.67503e-08	0.895792	0.349407
664	chr1	48452600	48452949	FALSE	Stable	3.09392	8.06054e-07	3.81916	5.16097e-11	0.266423	0.838023
665	chr1	48453000	48453149	FALSE	Stable	1.62882	0.00816599	2.99258	1.88482e-07	-0.372096	0.773808
666	chr1	48453300	48453849	FALSE	Stable	3.59529	1.35197e-08	3.49381	1.57512e-09	0.487432	0.698687
667	chr1	48454050	48454399	FALSE	Stable	3.70469	5.19682e-09	1.61675	0.00447397	0.250997	0.84831
668	chr1	48454600	48454699	FALSE	other	1.6079	0.00900519	0.528655	0.357622	1.0481	0.229738
669	chr1	48462250	48462449	FALSE	Stable	3.53196	2.30589e-08	3.20619	2.62111e-08	0.304995	0.814497
670	chr1	49029000	49029099	FALSE	Stable	1.55093	0.0117699	1.24133	0.0292445	-0.702839	0.525972
671	chr1	49030700	49030799	FALSE	Stable	2.11943	0.000604486	2.29781	5.58329e-05	-0.178378	0.897137
672	chr1	49378800	49379049	FALSE	Stable	3.20014	3.51023e-07	3.03376	1.29811e-07	-0.846061	0.39429
673	chr1	49380250	49380399	FALSE	Stable	1.75915	0.00430984	2.65876	3.36058e-06	-0.899602	0.346392
674	chr1	50617950	50618099	FALSE	other	2.52214	4.89762e-05	0.528655	0.357622	-0.0251276	0.986967
675	chr1	50620250	50620349	FALSE	other	0.955014	0.120498	1.37446	0.0157293	1.56803	0.0287349
676	chr1	50629100	50629199	FALSE	HH_dep	2.28082	0.000230412	0.365235	0.527498	1.91558	0.00367703
677	chr1	50962750	50962999	FALSE	other	1.03335	0.0928609	3.71984	1.50284e-10	-0.699014	0.52921
678	chr1	51479050	51479149	FALSE	other	1.77152	0.00404861	-0.216461	0.70958	0.637867	0.583611
679	chr1	51579900	51579999	FALSE	other	1.78294	0.00382153	1.0328	0.0700118	0.729368	0.501863
680	chr1	51592500	51592649	FALSE	other	1.92166	0.00184596	0.301819	0.602602	0.00586837	0.997023
681	chr1	51607650	51607749	FALSE	other	2.31486	0.000186309	-0.383352	0.506503	1.08424	0.206174
682	chr1	51617150	51618199	FALSE	Stable	4.01687	2.98756e-10	2.88236	5.03536e-07	0.0314917	0.984514
683	chr1	51618350	51618999	FALSE	Stable	2.84901	5.04701e-06	3.06427	9.82932e-08	0.125507	0.928383
684	chr1	51648750	51648949	FALSE	Stable	2.45147	7.79389e-05	1.95919	0.00057739	0.461143	0.717978
685	chr1	51649000	51651999	TRUE	Stable	4.14482	8.71156e-11	3.18608	3.16357e-08	0.852596	0.386785
686	chr1	51670650	51670749	FALSE	Stable	2.67187	1.77905e-05	1.73462	0.00229395	0.327396	0.800308
687	chr1	51671750	51671949	FALSE	other	1.9762	0.00136973	0.31135	0.591282	0.82372	0.414919
688	chr1	51696550	51697999	FALSE	Stable	3.31427	1.40795e-07	3.69763	1.90555e-10	0.664646	0.56018
689	chr1	51698250	51698449	FALSE	Stable	3.64107	9.07568e-09	1.81273	0.00144372	0.478224	0.706362
690	chr1	51705700	51706049	FALSE	Stable	2.60793	2.75471e-05	3.72303	1.45372e-10	0.443507	0.728594
691	chr1	51706700	51706799	FALSE	other	2.62047	2.52488e-05	0.608736	0.28836	0.984785	0.277075
692	chr1	51707000	51707149	FALSE	Stable	2.39792	0.000109985	1.9195	0.000743868	0.457655	0.719798
693	chr1	51759050	51759249	TRUE	HH_sens	2.8523	4.93203e-06	2.30576	5.26586e-05	1.52158	0.0358392
694	chr1	51759450	51759599	TRUE	other	2.85041	4.99884e-06	0.421134	0.465183	1.1745	0.152244
695	chr1	51781350	51781449	FALSE	other	1.28916	0.0361522	0.723732	0.205665	-0.0444346	0.976641
696	chr1	51855100	51855249	FALSE	other	3.38716	7.73826e-08	0.568334	0.322238	0.800214	0.435701
697	chr1	51914550	51916249	TRUE	Stable	4.44006	4.63512e-12	4.70708	1.51255e-15	0.353138	0.78506
698	chr1	51934900	51935049	FALSE	other	3.19935	3.52526e-07	0.674234	0.239157	0.18334	0.893972
699	chr1	52079450	52079749	FALSE	Stable	3.251	2.34263e-07	1.90008	0.000840755	0.323966	0.802451
700	chr1	52080200	52080849	FALSE	Stable	3.31912	1.35238e-07	2.55949	7.51639e-06	0.137328	0.921715
701	chr1	52081150	52081249	FALSE	other	1.5501	0.0118014	0.226888	0.69652	0.968915	0.289203
702	chr1	52113300	52113749	TRUE	Stable	2.71586	1.30926e-05	2.2187	9.92956e-05	0.252152	0.847569
703	chr1	52176350	52176499	FALSE	Stable	3.48975	3.31035e-08	1.61491	0.00451646	0.862396	0.378728
704	chr1	52176750	52176899	FALSE	Stable	1.27802	0.0377388	1.81967	0.0013841	0.165396	0.905546
705	chr1	52232100	52233199	FALSE	Stable	3.36289	9.50463e-08	3.13685	5.01972e-08	0.622827	0.596614
706	chr1	52241500	52242249	FALSE	Stable	2.4809	6.4373e-05	3.43553	2.80201e-09	0.333642	0.796203
707	chr1	52242650	52243249	FALSE	Stable	2.65437	2.00219e-05	2.36831	3.30732e-05	0.140702	0.919495
708	chr1	52243750	52243849	FALSE	Stable	1.54221	0.0122141	3.36161	5.86098e-09	-0.245566	0.852512
709	chr1	52260200	52260299	FALSE	Stable	2.17929	0.000425365	2.19739	0.00011538	-0.0180977	0.990095
710	chr1	52292950	52293399	FALSE	Stable	3.66076	7.68781e-09	1.81309	0.00144093	1.03301	0.240936
711	chr1	52294150	52294299	FALSE	Stable	2.62158	2.50829e-05	1.85017	0.00114876	0.326626	0.80068
712	chr1	52294550	52294649	FALSE	Stable	1.96148	0.00148388	1.55506	0.00625812	1.38146	0.0680649
713	chr1	52305300	52305499	FALSE	Stable	4.2239	4.11388e-11	1.33802	0.0187388	0.544102	0.660515
714	chr1	52306250	52306599	FALSE	Stable	2.90597	3.32464e-06	1.67025	0.00332345	0.978157	0.281727
715	chr1	52307600	52307699	FALSE	other	1.76855	0.00410643	0.731721	0.200777	1.00569	0.259953
716	chr1	52471350	52471799	FALSE	other	2.95482	2.3092e-06	0.504358	0.380644	1.41625	0.0585715
717	chr1	52523750	52523899	FALSE	other	2.09432	0.000700158	0.976831	0.0867993	-0.232625	0.861837
718	chr1	52578000	52578499	TRUE	Stable	2.69856	1.47337e-05	3.27425	1.37237e-08	0.486984	0.698988
719	chr1	52578750	52578949	TRUE	Stable	2.13408	0.000557271	2.70938	2.21101e-06	0.97825	0.281633
720	chr1	52579550	52579699	FALSE	other	1.0786	0.0795285	3.49076	1.61396e-09	-0.103601	0.941616
721	chr1	52630350	52631449	FALSE	Stable	4.44598	4.36742e-12	4.11628	1.84776e-12	0.398217	0.756667
722	chr1	52651500	52651949	FALSE	Stable	2.53345	4.54204e-05	2.64049	3.91084e-06	0.315507	0.807489
723	chr1	52652000	52653999	FALSE	Stable	3.9925	3.75705e-10	3.78357	7.58508e-11	0.219529	0.871179
724	chr1	52817350	52817549	FALSE	Stable	2.22274	0.000328107	1.57797	0.00553298	0.387205	0.763603
725	chr1	52845150	52845299	FALSE	Stable	3.03475	1.26424e-06	2.34943	3.81129e-05	0.240539	0.856142
726	chr1	53062850	53062949	FALSE	Stable	1.95307	0.00155237	1.72262	0.00245909	0.209676	0.8772
727	chr1	53122500	53123049	FALSE	HH_dep	4.29476	2.02326e-11	1.05887	0.0631675	1.88578	0.00449238
728	chr1	53123700	53124099	FALSE	Stable	3.0275	1.33962e-06	2.7358	1.76735e-06	1.26122	0.110674
729	chr1	53124750	53124899	FALSE	Stable	1.96092	0.00148845	1.38399	0.0150175	0.222631	0.869075
730	chr1	53200600	53201899	FALSE	Stable	3.2454	2.4503e-07	4.14637	1.30031e-12	0.213121	0.875299
731	chr1	53201950	53202049	FALSE	Stable	3.92493	7.04911e-10	2.84849	6.76111e-07	0.064007	0.965601
732	chr1	53202100	53203349	FALSE	Stable	3.64909	8.47968e-09	3.71038	1.66663e-10	0.414394	0.746904
733	chr1	53203400	53203599	FALSE	Stable	3.60874	1.20362e-08	2.71798	2.05518e-06	0.869991	0.371664
734	chr1	53296450	53297449	FALSE	Stable	2.88071	4.01733e-06	3.26362	1.51651e-08	0.401348	0.754499
735	chr1	53313050	53314299	FALSE	Stable	4.02874	2.65962e-10	3.5033	1.42226e-09	0.486904	0.698992
736	chr1	53352300	53352599	FALSE	Stable	2.04348	0.000937733	3.00004	1.76492e-07	0.0101929	0.994296
737	chr1	53706600	53707099	FALSE	Stable	2.98351	1.86716e-06	3.13842	4.95533e-08	0.224831	0.867554
738	chr1	53784850	53785099	FALSE	Stable	2.89619	3.57529e-06	1.88008	0.000953682	0.395196	0.758826
739	chr1	53909450	53909549	FALSE	other	1.05529	0.0863123	0.965978	0.0903064	0.475271	0.708327
740	chr1	53909700	53909949	FALSE	Stable	3.85814	1.30739e-09	2.37587	3.12411e-05	0.872413	0.369391
741	chr1	53986300	53986399	FALSE	other	1.66012	0.00701704	0.925679	0.104686	0.124584	0.928996
742	chr1	54069600	54070149	FALSE	Stable	2.57826	3.36995e-05	2.79688	1.05186e-06	-0.141288	0.919019
743	chr1	54070500	54071399	FALSE	Stable	3.25465	2.27655e-07	3.06253	9.99036e-08	-0.287456	0.825223
744	chr1	54071650	54071799	FALSE	other	1.05529	0.0863123	2.34329	3.99158e-05	-0.312957	0.809431
745	chr1	54118750	54118899	FALSE	Stable	1.90145	0.00205389	2.04491	0.000329276	-0.911401	0.336591
746	chr1	54119400	54120349	FALSE	Stable	2.67794	1.70109e-05	2.6516	3.56719e-06	-0.470241	0.711683
747	chr1	54129100	54129199	FALSE	other	0.0500365	0.935855	2.81091	9.31433e-07	-0.452309	0.723207
748	chr1	54147950	54148149	FALSE	other	0.781093	0.204341	3.24974	1.72436e-08	-0.160087	0.908325
749	chr1	54149200	54150049	FALSE	Stable	2.96532	2.14342e-06	3.71906	1.51607e-10	-0.138113	0.921219
750	chr1	54150250	54150599	FALSE	Stable	3.93529	6.42202e-10	1.57941	0.00548907	0.741912	0.490356
751	chr1	54150700	54151049	FALSE	Stable	1.8709	0.00242116	3.62318	4.17576e-10	-0.782768	0.451859
752	chr1	54194700	54195049	FALSE	Stable	2.85324	4.89967e-06	2.55803	7.60437e-06	0.0376412	0.980991
753	chr1	54199650	54199749	FALSE	HH_dep	1.81047	0.00331225	0.326913	0.572463	1.77351	0.00918476
754	chr1	54216950	54217099	FALSE	other	0.761672	0.215859	2.84806	6.78049e-07	-1.09473	0.199577
755	chr1	54250050	54250249	FALSE	Stable	2.13112	0.000565918	3.61963	4.32758e-10	0.498967	0.690852
756	chr1	54250850	54251199	FALSE	Stable	3.33681	1.1694e-07	2.14155	0.000170727	0.506331	0.686168
757	chr1	54438450	54439149	FALSE	Stable	4.29736	1.96775e-11	3.46505	2.09046e-09	0.433378	0.734589
758	chr1	54676700	54676999	FALSE	other	3.3301	1.23588e-07	0.71879	0.208724	0.411014	0.748492
759	chr1	54677400	54677499	FALSE	Stable	1.85112	0.0026817	1.31282	0.0210834	0.517534	0.678228
760	chr1	54702150	54704649	FALSE	Stable	4.23362	3.7528e-11	2.80741	9.60194e-07	0.54931	0.656055
761	chr1	54713750	54713849	FALSE	other	2.32476	0.000174929	0.351306	0.543319	1.20551	0.136121
762	chr1	54906150	54907999	TRUE	Stable	3.69302	5.74106e-09	3.5623	7.79583e-10	0.15576	0.910533
763	chr1	54908850	54909249	FALSE	Stable	3.3056	1.51034e-07	2.1033	0.000221985	-0.00218535	0.998688
764	chr1	54909400	54909549	FALSE	Stable	1.87966	0.00230953	2.43135	2.05014e-05	-0.582822	0.630758
765	chr1	54913300	54915449	FALSE	Stable	3.01283	1.49409e-06	3.52531	1.13338e-09	-0.219992	0.87099
766	chr1	54915750	54916749	FALSE	Stable	3.38952	7.60291e-08	2.71949	2.02876e-06	0.0782286	0.957296
767	chr1	54916900	54916999	FALSE	Stable	2.54142	4.3109e-05	3.54263	9.52479e-10	-0.00955234	0.994847
768	chr1	54917150	54917799	FALSE	Stable	2.10654	0.000652665	4.14865	1.26909e-12	0.148196	0.914597
769	chr1	54925350	54927199	FALSE	Stable	3.53683	2.22512e-08	3.55207	8.68911e-10	0.277245	0.831303
770	chr1	54930600	54930949	TRUE	Stable	2.81078	6.65062e-06	1.2284	0.030974	1.35372	0.076839
771	chr1	54931250	54931499	TRUE	HH_dep	4.53419	1.73796e-12	0.205278	0.724247	1.72328	0.0121804
772	chr1	54960400	54961499	FALSE	Stable	2.88266	3.95764e-06	2.35689	3.60487e-05	0.697832	0.530319
773	chr1	54961600	54961899	FALSE	other	3.70346	5.25065e-09	1.07117	0.0601414	0.431994	0.735559
774	chr1	54966350	54966499	FALSE	Stable	2.95983	2.22963e-06	1.75105	0.00208403	0.181819	0.895162
775	chr1	54969250	54969449	FALSE	other	3.43082	5.41806e-08	0.541481	0.345847	1.05239	0.226318
776	chr1	54969750	54970799	FALSE	Stable	3.63122	9.89102e-09	1.8372	0.00124498	0.492199	0.695703
777	chr1	54971300	54972099	TRUE	Stable	2.90009	3.47294e-06	2.98174	2.07863e-07	0.242118	0.855132
778	chr1	54972350	54972649	TRUE	Stable	2.73791	1.11854e-05	3.49654	1.5294e-09	-0.115022	0.934354
779	chr1	54972800	54972999	FALSE	Stable	2.18996	0.000398831	1.81192	0.00144983	0.0237376	0.987666
780	chr1	55026500	55027949	FALSE	Stable	4.88455	4.38188e-14	4.25788	3.55105e-13	0.429135	0.737159
781	chr1	55052300	55052499	FALSE	Stable	2.61191	2.6775e-05	1.54888	0.00646749	0.444877	0.727948
782	chr1	55052900	55053149	FALSE	Stable	2.48856	6.13103e-05	2.06472	0.000288615	0.388256	0.763207
783	chr1	55086800	55086899	FALSE	other	1.51166	0.0140307	1.01442	0.0751398	1.27166	0.106952
784	chr1	55087000	55089249	TRUE	Stable	4.35836	1.07298e-11	3.60337	5.11613e-10	0.884415	0.359285
785	chr1	55089400	55089499	FALSE	other	2.3138	0.00018745	0.939578	0.0995639	0.929438	0.321693
786	chr1	55130700	55130949	TRUE	Stable	2.2125	0.000349222	2.44334	1.86639e-05	0.220416	0.870751
787	chr1	55131150	55131949	TRUE	Stable	4.47123	3.35725e-12	4.08254	2.73278e-12	0.271423	0.83487
788	chr1	55132150	55132299	FALSE	Stable	3.12737	6.2298e-07	3.89026	2.34982e-11	0.228777	0.864794
789	chr1	55181750	55181949	FALSE	other	2.83453	5.60264e-06	0.0470245	0.935816	1.33964	0.0817739
790	chr1	55183200	55183399	FALSE	HH_dep	3.75529	3.29976e-09	-0.581134	0.311261	2.31781	0.000189985
791	chr1	55192250	55193399	FALSE	Stable	3.3278	1.25726e-07	2.44306	1.87003e-05	0.685074	0.543079
792	chr1	55193650	55194049	FALSE	Stable	2.7503	1.02523e-05	1.94823	0.000619783	0.522983	0.674846
793	chr1	55194400	55194599	FALSE	HH_sens	3.0589	1.05537e-06	1.43151	0.0118686	1.5997	0.0243403
794	chr1	55210550	55210799	FALSE	Stable	3.26063	2.16768e-07	2.22115	9.75881e-05	0.421322	0.74219
795	chr1	55223800	55224349	FALSE	Stable	3.01931	1.42482e-06	2.57254	6.78961e-06	0.24019	0.856406
796	chr1	55224500	55226899	FALSE	Stable	3.12493	6.34944e-07	3.38881	4.47248e-09	0.189018	0.890081
797	chr1	55236750	55236949	TRUE	Stable	4.02924	2.64646e-10	1.42789	0.0120867	0.259572	0.842162
798	chr1	55237500	55237599	TRUE	other	2.16082	0.000474766	0.565674	0.324413	0.245036	0.852977
799	chr1	55432800	55433649	FALSE	Stable	3.52353	2.48477e-08	2.11299	0.000207716	1.37319	0.0707731
800	chr1	55434250	55434449	FALSE	Stable	3.34047	1.13465e-07	1.44458	0.0111072	0.868937	0.372433
801	chr1	55435000	55435249	FALSE	Stable	1.88483	0.00224589	1.74393	0.00217421	0.592155	0.621735
802	chr1	55501500	55501699	FALSE	other	2.27212	0.000242995	0.0266189	0.963579	1.21855	0.129661
803	chr1	55911150	55911299	FALSE	Stable	2.64473	2.13743e-05	1.68064	0.00313351	0.94331	0.309684
804	chr1	55914350	55914499	FALSE	Stable	1.70161	0.00573579	2.17375	0.000136128	0.0892612	0.950822
805	chr1	56036500	56036699	FALSE	other	3.51637	2.63696e-08	-0.0782741	0.893552	0.766037	0.467135
806	chr1	56037000	56037099	FALSE	other	0.597837	0.331975	2.22228	9.67879e-05	0.684122	0.543887
807	chr1	56183550	56183649	FALSE	other	-0.862435	0.160945	2.69942	2.39809e-06	-0.576481	0.635145
808	chr1	56250050	56250499	FALSE	Stable	3.5384	2.19944e-08	3.07892	8.60329e-08	0.438706	0.73193
809	chr1	56539750	56540299	FALSE	Stable	1.46357	0.0173937	4.78809	5.24953e-16	0.360487	0.78073
810	chr1	56674700	56674849	FALSE	other	1.12562	0.0672194	1.98235	0.000497772	0.112795	0.935597
811	chr1	56972500	56973499	TRUE	Stable	4.28613	2.21415e-11	3.51968	1.2027e-09	0.63451	0.586398
812	chr1	57095600	57096249	FALSE	Stable	3.61255	1.16681e-08	1.49384	0.00864953	1.08044	0.208557
813	chr1	57096450	57097199	TRUE	Stable	4.0464	2.25822e-10	2.78692	1.14578e-06	0.806868	0.429528
814	chr1	57377000	57377399	FALSE	Stable	3.10214	7.57245e-07	1.60839	0.00468363	1.04309	0.232858
815	chr1	57377700	57378049	FALSE	Stable	3.55673	1.87844e-08	1.48168	0.00920565	0.232162	0.861983
816	chr1	57405850	57407399	TRUE	Stable	4.61851	7.25861e-13	4.14743	1.28582e-12	0.430972	0.735985
817	chr1	57428850	57428999	FALSE	other	1.94254	0.0016437	0.831732	0.145373	0.0790099	0.956792
818	chr1	57429550	57429649	FALSE	Stable	2.21395	0.000346169	3.02504	1.40396e-07	0.180575	0.896067
819	chr1	57440100	57440249	FALSE	other	3.69868	5.48077e-09	0.709881	0.214479	0.383171	0.766582
820	chr1	57440400	57440499	FALSE	Stable	1.43791	0.0194276	1.24734	0.0284824	0.964978	0.292039
821	chr1	57440700	57440949	FALSE	Stable	2.72793	1.20011e-05	1.70537	0.00271566	0.571905	0.639327
822	chr1	57476600	57476749	FALSE	Stable	2.10379	0.000663041	3.68673	2.13105e-10	0.72563	0.505142
823	chr1	57476950	57479699	FALSE	Stable	3.83111	1.67614e-09	3.83337	4.39985e-11	0.591339	0.622441
824	chr1	57479750	57480649	FALSE	Stable	3.90466	8.52562e-10	2.84394	7.02744e-07	0.915361	0.333407
825	chr1	57488550	57488649	FALSE	other	0.756436	0.218967	0.978032	0.0864176	0.068353	0.963139
826	chr1	57489750	57490049	FALSE	Stable	2.20038	0.000375048	3.28303	1.2606e-08	-0.308242	0.812269
827	chr1	57493100	57493249	FALSE	Stable	2.54383	4.25146e-05	1.79912	0.00156712	0.134845	0.923413
828	chr1	57675000	57675149	FALSE	Stable	1.33257	0.0302759	2.45076	1.76354e-05	-0.556794	0.650396
829	chr1	57774350	57775649	FALSE	Stable	4.3068	1.79438e-11	2.8674	5.72718e-07	0.345665	0.789093
830	chr1	57806500	57806649	FALSE	Stable	2.59492	3.01056e-05	1.9373	0.000664131	0.0477648	0.975199
831	chr1	57807650	57807749	FALSE	other	2.52471	4.81471e-05	-0.526267	0.359882	1.02095	0.249101
832	chr1	57904050	57904399	FALSE	Stable	2.85403	4.87442e-06	1.37807	0.0154569	1.12166	0.182249
833	chr1	57904650	57905299	FALSE	Stable	3.06288	1.02314e-06	1.7624	0.00195168	0.496575	0.692961
834	chr1	57905450	57905949	FALSE	Stable	3.24832	2.39509e-07	3.34874	6.63495e-09	0.279323	0.829587
835	chr1	57906500	57907099	FALSE	Stable	3.78341	2.56301e-09	3.36144	5.87013e-09	0.21538	0.873835
836	chr1	57949000	57949149	FALSE	other	2.8157	6.42259e-06	0.864168	0.130207	1.34167	0.0809985
837	chr1	57962050	57962199	FALSE	other	2.47323	6.76659e-05	0.0273884	0.962735	0.831876	0.40704
838	chr1	57969550	57970049	FALSE	Stable	4.18226	6.14351e-11	2.8736	5.42209e-07	0.135256	0.923069
839	chr1	57995500	57995699	FALSE	Stable	3.04649	1.16372e-06	2.0392	0.000342124	0.9796	0.280705
840	chr1	57995950	57996499	FALSE	Stable	3.28025	1.85585e-07	2.48018	1.40651e-05	0.133515	0.924025
841	chr1	58392050	58393449	TRUE	Stable	5.10955	3.7685e-15	4.57604	7.93896e-15	0.309341	0.811913
842	chr1	58393600	58393899	FALSE	Stable	2.42803	9.09766e-05	2.87012	5.59139e-07	0.524675	0.674177
843	chr1	58422950	58423099	FALSE	Stable	2.45446	7.64839e-05	1.29232	0.0231713	0.321009	0.804359
844	chr1	58423150	58424149	FALSE	Stable	5.24951	8.25445e-16	4.36342	1.02602e-13	0.339433	0.792458
845	chr1	58445000	58446049	FALSE	Stable	2.97145	2.04388e-06	2.25178	7.82436e-05	0.438881	0.731909
846	chr1	58504400	58504949	FALSE	Stable	2.52968	4.66599e-05	3.2756	1.35567e-08	0.464476	0.715317
847	chr1	58586150	58586849	FALSE	Stable	3.67487	6.75848e-09	4.31539	1.82767e-13	0.515194	0.68028
848	chr1	58710950	58712349	FALSE	Stable	3.96624	4.82331e-10	4.45695	3.31776e-14	0.470332	0.711656
849	chr1	58713200	58713849	FALSE	Stable	5.14181	2.64676e-15	5.12829	5.85774e-18	0.399475	0.755562
850	chr1	58713900	58714199	FALSE	Stable	3.65896	7.79787e-09	1.22664	0.031219	-0.0579802	0.969621
851	chr1	58795800	58796099	FALSE	Stable	2.94174	2.54403e-06	2.0392	0.000342124	0.874851	0.367872
852	chr1	58825600	58825849	FALSE	HH_dep	3.61085	1.18164e-08	0.817832	0.152359	1.95188	0.00290559
853	chr1	58825900	58826349	TRUE	HH_sens	3.02507	1.3647e-06	2.15914	0.000150721	2.0938	0.00110776
854	chr1	58826900	58826999	TRUE	HH_dep	2.80627	6.86737e-06	-1.67431	0.00325022	3.44878	1.51878e-09
855	chr1	58951200	58951399	FALSE	Stable	2.705	1.40871e-05	1.22668	0.0312138	0.128209	0.926778
856	chr1	58972900	58973349	TRUE	Stable	2.90685	3.30569e-06	3.26773	1.45975e-08	0.34037	0.792247
857	chr1	58973550	58973949	TRUE	Stable	2.97683	1.96442e-06	2.6016	5.35399e-06	-0.0236951	0.987672
858	chr1	59119800	59120749	TRUE	Stable	3.56989	1.67586e-08	3.8743	2.8084e-11	0.575362	0.636368
859	chr1	59236850	59236999	FALSE	other	1.11658	0.0694532	3.63485	3.69926e-10	0.274763	0.8325
860	chr1	59237850	59238049	FALSE	Stable	2.00778	0.00114721	1.56525	0.0059264	0.411381	0.748163
861	chr1	59268900	59271999	TRUE	Stable	3.98117	4.19144e-10	3.91765	1.75221e-11	0.160331	0.908216
862	chr1	59272300	59272549	FALSE	Stable	2.42118	9.50551e-05	1.87883	0.000960605	-0.075803	0.958749
863	chr1	59292150	59292349	FALSE	Stable	1.6276	0.00821457	2.38344	2.9546e-05	-0.786976	0.447885
864	chr1	59316450	59316549	FALSE	Stable	2.39861	0.000109558	2.86554	5.82043e-07	0.0944594	0.947442
865	chr1	59320850	59323199	TRUE	Stable	3.69173	5.80924e-09	4.01496	5.90633e-12	0.15089	0.913412
866	chr1	59323500	59323699	FALSE	Stable	2.16501	0.000463709	1.63806	0.00397737	-0.504846	0.687254
867	chr1	59326500	59326899	FALSE	other	3.00817	1.54894e-06	1.06401	0.0619024	0.909938	0.337787
868	chr1	59332450	59332599	FALSE	Stable	2.56229	3.75616e-05	2.68344	2.74501e-06	0.264809	0.83886
869	chr1	59334250	59334999	FALSE	Stable	2.78603	7.97027e-06	3.29276	1.14443e-08	0.263404	0.839747
870	chr1	59335150	59335249	FALSE	Stable	2.6831	1.64215e-05	1.79847	0.00157235	1.44602	0.0510224
871	chr1	59339350	59339549	FALSE	Stable	2.2568	0.00026731	2.69683	2.45108e-06	0.267009	0.837966
872	chr1	59367750	59367999	FALSE	HH_dep	2.58753	3.15985e-05	0.0874502	0.881301	1.88192	0.00459036
873	chr1	59368150	59368249	FALSE	other	2.80992	6.68282e-06	0.225723	0.697792	1.23409	0.122797
874	chr1	59368550	59368699	FALSE	HH_dep	2.28126	0.000229905	1.07735	0.0586485	1.76531	0.00968639
875	chr1	59369300	59369499	FALSE	HH_dep	2.49048	6.05169e-05	-0.958965	0.0926887	1.54131	0.0327689
876	chr1	59371700	59371849	FALSE	other	3.53308	2.28869e-08	0.123914	0.831741	1.06739	0.216502
877	chr1	59376750	59376849	FALSE	HH_sens	2.20769	0.000358781	1.732	0.0023293	1.46734	0.0463664
878	chr1	59394300	59394499	FALSE	Stable	2.89869	3.5098e-06	3.50359	1.4177e-09	-0.0435041	0.977325
879	chr1	59394800	59395649	FALSE	Stable	3.94532	5.85723e-10	3.36399	5.72429e-09	0.0730147	0.960738
880	chr1	59437400	59437899	FALSE	Stable	3.43921	5.0549e-08	2.01243	0.000408143	0.496499	0.693002
881	chr1	59438300	59438599	FALSE	Stable	3.30172	1.55483e-07	2.01525	0.000400576	0.445337	0.727754
882	chr1	59450100	59450349	FALSE	other	0.641561	0.297743	4.0462	4.15105e-12	-0.249568	0.849321
883	chr1	59450400	59450549	FALSE	Stable	2.66772	1.83003e-05	1.79281	0.00162667	0.265054	0.838587
884	chr1	59450650	59451149	FALSE	Stable	1.78636	0.00375735	2.70564	2.2796e-06	0.0447366	0.976444
885	chr1	59457600	59457849	FALSE	other	1.01207	0.0998522	2.33689	4.18608e-05	-0.775382	0.458543
886	chr1	59458050	59458199	FALSE	Stable	2.31653	0.000184268	2.1723	0.000137475	-0.465626	0.714304
887	chr1	59458500	59459199	FALSE	Stable	3.0376	1.23935e-06	3.47094	1.96791e-09	-0.0556602	0.970736
888	chr1	59473500	59473649	FALSE	other	1.18935	0.0531425	2.99258	1.88482e-07	-0.2294	0.864545
889	chr1	59480300	59482049	TRUE	Stable	5.46505	7.07004e-17	4.80805	4.1414e-16	0.295403	0.821216
890	chr1	59482100	59483149	TRUE	Stable	3.93104	6.67849e-10	4.10087	2.2118e-12	0.226947	0.865913
891	chr1	59483450	59483699	FALSE	Stable	2.33015	0.000169033	1.80456	0.00151691	0.491002	0.696424
892	chr1	59484450	59484549	FALSE	Stable	2.32476	0.000174929	2.03043	0.00036249	0.266643	0.837966
893	chr1	59484650	59485899	FALSE	Stable	3.31044	1.45185e-07	2.4563	1.68986e-05	0.452646	0.723207
894	chr1	59515700	59516449	FALSE	Stable	3.9423	6.0276e-10	3.65377	3.04209e-10	0.113448	0.935146
895	chr1	59520000	59520099	FALSE	Stable	2.54042	4.33633e-05	1.75251	0.00206732	0.767144	0.465947
896	chr1	59521150	59521299	FALSE	other	3.20014	3.51023e-07	0.893906	0.117325	0.70471	0.524871
897	chr1	59548750	59549049	FALSE	Stable	2.56147	3.77651e-05	1.88979	0.000896914	0.374605	0.772209
898	chr1	59583950	59584149	FALSE	other	1.92026	0.00185912	1.05659	0.0637331	0.150533	0.913723
899	chr1	59608900	59609199	FALSE	other	1.03032	0.0938276	3.58358	6.23913e-10	-0.565787	0.64362
900	chr1	59633000	59633199	FALSE	Stable	1.38103	0.024776	3.47678	1.85465e-09	-0.521916	0.675458
901	chr1	59669850	59671599	FALSE	Stable	4.51612	2.10403e-12	3.64291	3.41755e-10	0.489158	0.697299
902	chr1	59684450	59685799	FALSE	Stable	4.31809	1.6036e-11	3.83365	4.38523e-11	0.656512	0.567246
903	chr1	59762300	59764249	TRUE	Stable	5.31127	3.96024e-16	4.55054	1.07777e-14	0.398829	0.756177
904	chr1	59764350	59764999	FALSE	Stable	3.33746	1.16297e-07	2.66127	3.29345e-06	0.124979	0.928664
905	chr1	59830700	59830949	FALSE	Stable	1.73166	0.00494255	2.42684	2.12098e-05	-0.133791	0.923819
906	chr1	59831000	59831299	FALSE	Stable	3.53549	2.24402e-08	2.97615	2.18605e-07	-0.0505163	0.97386
907	chr1	59832750	59832949	FALSE	Stable	3.00333	1.60477e-06	1.75899	0.00198982	0.217388	0.872607
908	chr1	59833100	59833449	FALSE	Stable	3.62763	1.02148e-08	2.15676	0.000153324	-0.366079	0.777449
909	chr1	59834000	59834199	FALSE	Stable	2.41563	9.8376e-05	1.4221	0.0124491	0.152391	0.912446
910	chr1	59912400	59913649	TRUE	Stable	4.02596	2.72816e-10	3.75444	1.04003e-10	0.61993	0.598726
911	chr1	60097700	60098849	TRUE	Stable	3.46703	4.01256e-08	3.15619	4.18819e-08	0.271313	0.834927
912	chr1	60158150	60158349	FALSE	Stable	3.75933	3.19033e-09	2.77314	1.29367e-06	-0.0262503	0.986486
913	chr1	60179650	60180349	FALSE	Stable	2.30959	0.000192248	3.94837	1.23792e-11	-0.483059	0.702406
914	chr1	60180600	60181499	FALSE	Stable	4.76001	1.57505e-13	3.22021	2.29184e-08	0.253779	0.84631
915	chr1	60342950	60343099	FALSE	other	2.13395	0.000557676	0.900614	0.114585	0.782685	0.451941
916	chr1	60343200	60343599	FALSE	Stable	3.49399	3.19551e-08	2.15656	0.000153549	0.492437	0.69549
917	chr1	60408700	60410599	TRUE	Stable	4.11528	1.16467e-10	4.31636	1.80838e-13	0.187699	0.891024
918	chr1	60565900	60566749	FALSE	Stable	3.66263	7.55594e-09	3.14063	4.86722e-08	0.38381	0.766146
919	chr1	60567000	60567299	FALSE	Stable	4.12735	1.04042e-10	2.89763	4.39648e-07	0.202764	0.881225
920	chr1	60916000	60916099	FALSE	other	2.19079	0.000396803	0.106699	0.854858	1.05714	0.222744
921	chr1	61017200	61017349	FALSE	other	3.51637	2.63696e-08	0.959452	0.0925142	0.215144	0.873859
922	chr1	61055600	61055749	FALSE	HH_dep	2.52674	4.75556e-05	-1.23155	0.030549	2.73134	4.98535e-06
923	chr1	61099450	61099849	FALSE	other	3.73858	3.84415e-09	0.375605	0.515493	1.0104	0.256603
924	chr1	61099900	61100249	FALSE	Stable	1.71819	0.00528639	3.58995	5.86324e-10	0.560031	0.647686
925	chr1	61139200	61139349	FALSE	other	3.80913	2.04074e-09	0.781393	0.171507	1.00913	0.257251
926	chr1	61139550	61139949	FALSE	Stable	3.67069	7.02079e-09	1.33555	0.0189661	1.13065	0.176985
927	chr1	61140300	61140549	FALSE	other	3.50163	2.99589e-08	0.853876	0.134742	0.810804	0.42622
928	chr1	61141050	61143749	FALSE	Stable	4.17448	6.59678e-11	3.12966	5.35757e-08	0.873017	0.369323
929	chr1	61146100	61146399	FALSE	HH_dep	2.06715	0.000820478	0.255265	0.660682	1.7763	0.00903525
930	chr1	61146600	61146699	FALSE	Stable	3.32983	1.23609e-07	2.56866	6.98806e-06	0.761162	0.47105
931	chr1	61151500	61151749	FALSE	Stable	2.38425	0.00012009	1.58358	0.00536513	1.25193	0.114883
932	chr1	61151950	61152249	FALSE	Stable	3.48326	3.5051e-08	1.40633	0.0134591	1.30899	0.0924362
933	chr1	61152550	61152649	FALSE	other	2.41714	9.75457e-05	0.720223	0.207832	0.669964	0.556439
934	chr1	61180850	61180999	FALSE	Stable	1.75554	0.00438102	1.75665	0.00201768	0.228149	0.865236
935	chr1	61181650	61182099	FALSE	Stable	2.61432	2.63391e-05	1.54323	0.00666795	1.27413	0.106062
936	chr1	61182300	61182449	FALSE	other	2.42765	9.118e-05	0.754966	0.186759	0.640885	0.580911
937	chr1	61182900	61182999	FALSE	other	2.62047	2.52488e-05	0.0118196	0.983663	0.771707	0.461627
938	chr1	61188000	61188099	FALSE	HH_dep	2.04673	0.00092098	-1.67431	0.00325022	2.68925	7.1474e-06
939	chr1	61232500	61232649	FALSE	HH_dep	3.64887	8.47968e-09	-0.989855	0.0826692	2.0331	0.00163608
940	chr1	61233000	61233499	FALSE	HH_sens	3.30456	1.52139e-07	1.28025	0.0245019	1.57169	0.0283263
941	chr1	61233650	61235049	TRUE	HH_sens	3.5512	1.97194e-08	2.0477	0.000323569	1.52518	0.0354329
942	chr1	61272950	61273099	FALSE	Stable	2.44144	8.31713e-05	1.61299	0.00456312	-0.203353	0.880702
943	chr1	61297400	61297499	FALSE	other	0.98711	0.108559	1.04827	0.0658575	0.913881	0.334661
944	chr1	61297750	61297999	TRUE	Stable	2.46738	7.03733e-05	3.06131	1.00969e-07	0.702195	0.52639
945	chr1	61298500	61298949	TRUE	Stable	3.54385	2.10224e-08	2.15177	0.00015876	0.823831	0.414878
946	chr1	61300350	61300499	FALSE	other	2.69693	1.48954e-05	0.163325	0.779353	1.27883	0.104011
947	chr1	61300650	61300899	FALSE	HH_dep	2.4225	9.43114e-05	0.335558	0.561993	1.53574	0.0335515
948	chr1	61301050	61301849	TRUE	HH_sens	3.07436	9.36375e-07	1.25233	0.0278549	1.50308	0.0392251
949	chr1	61302050	61302199	FALSE	HH_dep	2.43055	8.94298e-05	0.661386	0.248409	1.74148	0.0109402
950	chr1	61302950	61303149	FALSE	Stable	1.94067	0.00166076	1.51244	0.00783848	0.657496	0.56611
951	chr1	61303350	61303549	FALSE	Stable	2.39831	0.000109748	3.13424	5.12824e-08	0.8379	0.401794
952	chr1	61353300	61353499	FALSE	Stable	2.63268	2.32807e-05	1.37504	0.0156862	0.489699	0.697211
953	chr1	61373550	61373749	FALSE	Stable	1.88184	0.00228275	1.84266	0.00120362	0.00804557	0.995975
954	chr1	61379850	61379999	FALSE	Stable	3.80736	2.07014e-09	1.33497	0.0190069	0.87087	0.370808
955	chr1	61402150	61402249	FALSE	other	2.54207	4.29617e-05	-0.852694	0.135297	1.37615	0.0700111
956	chr1	61404250	61404849	FALSE	Stable	3.3155	1.3939e-07	2.51869	1.03634e-05	0.178658	0.896968
957	chr1	61405050	61405749	FALSE	Stable	3.52313	2.49341e-08	3.12049	5.84616e-08	0.196051	0.885751
958	chr1	61405900	61406599	FALSE	Stable	3.41976	5.95308e-08	2.8067	9.66115e-07	0.368056	0.776275
959	chr1	61407350	61408349	TRUE	Stable	3.99031	3.83994e-10	2.08462	0.000252204	1.00812	0.258219
960	chr1	61530500	61530699	FALSE	Stable	2.84912	5.04314e-06	1.80669	0.00149698	0.432572	0.735184
961	chr1	61923700	61923799	FALSE	other	1.91474	0.00191039	-0.10934	0.851522	0.997126	0.266653
962	chr1	61925750	61925949	FALSE	Stable	3.27998	1.85979e-07	1.21131	0.0334118	0.298274	0.819921
963	chr1	61926150	61926299	FALSE	Stable	2.31273	0.00018872	1.49816	0.00845505	0.196414	0.885563
964	chr1	61926400	61926599	FALSE	Stable	1.2471	0.0425706	2.60783	5.09752e-06	-0.0724596	0.96102
965	chr1	61926950	61929249	FALSE	Stable	3.75973	3.18195e-09	3.80358	6.07153e-11	0.481688	0.70357
966	chr1	61929900	61930299	FALSE	Stable	3.4218	5.85309e-08	1.45116	0.0107463	0.766153	0.467044
967	chr1	61930600	61930749	FALSE	Stable	3.07342	9.42106e-07	1.33067	0.0193832	0.715798	0.514157
968	chr1	61932350	61932549	FALSE	other	1.15985	0.0593175	2.38821	2.84753e-05	-0.253316	0.846918
969	chr1	61934900	61934999	FALSE	Stable	1.91591	0.00190028	2.23731	8.68139e-05	0.240003	0.856406
970	chr1	61939050	61939349	FALSE	other	3.25309	2.30487e-07	0.413546	0.473485	1.06915	0.215297
971	chr1	61983650	61983799	FALSE	other	2.54042	4.33633e-05	0.61946	0.279943	0.306996	0.813044
972	chr1	62015450	62017549	FALSE	Stable	3.69711	5.54272e-09	3.60017	5.29129e-10	0.641899	0.579703
973	chr1	62017750	62018549	FALSE	Stable	3.69344	5.72003e-09	3.31044	9.61154e-09	0.608394	0.608389
974	chr1	62018700	62019149	FALSE	Stable	2.36661	0.000134581	3.06939	9.40326e-08	0.483411	0.702012
975	chr1	62019350	62019849	FALSE	Stable	2.99842	1.66714e-06	1.75906	0.00198955	0.52302	0.674846
976	chr1	62020150	62021049	FALSE	Stable	3.39363	7.35406e-08	3.32046	8.75569e-09	0.537215	0.665344
977	chr1	62073550	62073849	FALSE	other	3.60773	1.21424e-08	1.02741	0.0714691	0.380019	0.768437
978	chr1	62075600	62075999	FALSE	other	2.66343	1.88621e-05	0.668377	0.24343	0.959382	0.296059
979	chr1	62076450	62076599	FALSE	other	1.74801	0.00454789	0.857815	0.132985	0.859051	0.381024
980	chr1	62081150	62081799	FALSE	Stable	4.57588	1.13497e-12	3.71411	1.59771e-10	0.507472	0.685153
981	chr1	62082150	62082849	FALSE	Stable	3.16615	4.58739e-07	1.89529	0.000867164	0.647725	0.574701
982	chr1	62084400	62084549	FALSE	Stable	2.91231	3.17379e-06	1.75908	0.00198941	0.543377	0.660822
983	chr1	62085550	62086699	FALSE	Stable	2.27182	0.000243476	2.97383	2.23307e-07	0.143614	0.917617
984	chr1	62153900	62154149	FALSE	Stable	1.66987	0.0067033	3.10035	7.0462e-08	-0.134349	0.923531
985	chr1	62155150	62155999	FALSE	Stable	3.06883	9.75259e-07	2.99993	1.76684e-07	0.470626	0.711566
986	chr1	62156300	62157249	FALSE	Stable	4.20763	4.83072e-11	2.99833	1.79264e-07	0.586988	0.626525
987	chr1	62161250	62161399	FALSE	other	-0.0406428	0.947597	3.06872	9.44009e-08	-0.123985	0.929383
988	chr1	62165200	62165999	FALSE	Stable	3.1365	5.79648e-07	2.68505	2.70837e-06	0.415127	0.746223
989	chr1	62166500	62166799	FALSE	Stable	2.91342	3.15216e-06	1.56409	0.00596307	0.508188	0.684619
990	chr1	62177600	62177999	FALSE	HH_dep	3.05286	1.10805e-06	0.826779	0.147823	1.60516	0.0237599
991	chr1	62182000	62182099	FALSE	other	0.545598	0.37618	1.64632	0.00379448	-0.539325	0.663999
992	chr1	62187900	62187999	FALSE	other	1.04136	0.0903987	2.23404	8.88704e-05	0.381156	0.767661
993	chr1	62189500	62189699	FALSE	Stable	2.77383	8.69359e-06	1.19135	0.0364327	0.972618	0.286504
994	chr1	62190150	62190299	FALSE	Stable	2.19369	0.000390843	2.19067	0.000120937	1.29915	0.0962488
995	chr1	62190350	62190849	FALSE	Stable	3.54248	2.12409e-08	2.28322	6.21269e-05	0.962199	0.294122
996	chr1	62206400	62206549	FALSE	Stable	2.85839	4.72071e-06	1.27491	0.0250913	-0.0180379	0.990095
997	chr1	62207050	62207199	FALSE	other	3.34363	1.10513e-07	0.817832	0.152359	-0.302813	0.816164
998	chr1	62243550	62244049	FALSE	Stable	4.17603	6.51378e-11	2.91357	3.82296e-07	1.24168	0.11963
999	chr1	62244250	62245349	FALSE	HH_sens	3.65515	8.0517e-09	2.36948	3.28075e-05	1.45364	0.0495014
1000	chr1	62271300	62271499	FALSE	SHHnullonly	0.964074	0.1171	3.0258	1.39503e-07	-1.50033	0.0396835
1001	chr1	62322650	62322749	FALSE	other	1.86799	0.00245616	0.500596	0.384202	0.757537	0.474451
1002	chr1	62325500	62325849	FALSE	other	3.71333	4.81679e-09	1.0256	0.0719368	0.850779	0.389114
1003	chr1	62373600	62373699	FALSE	Stable	2.27212	0.000242995	1.51664	0.00766793	0.145619	0.916106
1004	chr1	62374200	62374349	FALSE	Stable	2.45143	7.79389e-05	2.73567	1.76898e-06	-0.305019	0.814476
1005	chr1	62375000	62375099	FALSE	Stable	2.21862	0.000336643	1.53272	0.00704666	0.0760396	0.958643
1006	chr1	62375400	62375499	FALSE	other	2.59281	3.05064e-05	0.285575	0.622548	-0.0345426	0.982932
1007	chr1	62380750	62380899	FALSE	Stable	1.91121	0.00194697	1.97299	0.000528306	-1.07422	0.212389
1008	chr1	62381400	62381549	FALSE	Stable	1.83083	0.00298005	1.98014	0.000504217	0.412086	0.747768
1009	chr1	62381800	62381899	FALSE	other	3.53604	2.23517e-08	0.476812	0.407328	1.04061	0.234947
1010	chr1	62382150	62382449	FALSE	Stable	3.9961	3.6418e-10	3.06872	9.44009e-08	0.906603	0.340595
1011	chr1	62382550	62383149	TRUE	Stable	3.54015	2.16776e-08	3.48486	1.71188e-09	0.604727	0.610921
1012	chr1	62383300	62384299	TRUE	Stable	3.44885	4.67389e-08	2.11569	0.000203812	0.656048	0.567852
1013	chr1	62390550	62390749	FALSE	Stable	3.04709	1.15848e-06	1.25564	0.0274513	0.177477	0.897778
1014	chr1	62436000	62436199	FALSE	Stable	1.36772	0.0261902	2.9887	1.95137e-07	-0.645934	0.576349
1015	chr1	62562450	62562599	FALSE	other	2.90693	3.30383e-06	-0.196689	0.73561	1.07359	0.212816
1016	chr1	62562750	62562899	TRUE	Stable	2.39324	0.000113312	1.19084	0.0365034	1.17126	0.153867
1017	chr1	62563200	62563399	TRUE	other	2.19617	0.000384996	0.520032	0.365638	0.963007	0.293487
1018	chr1	62564150	62564899	FALSE	Stable	4.0126	3.11346e-10	1.99527	0.00045759	1.39641	0.0636312
1019	chr1	62577100	62577249	FALSE	other	2.74994	1.02693e-05	0.57531	0.316239	1.16219	0.158607
1020	chr1	62579350	62579599	FALSE	HH_dep	3.95157	5.53173e-10	1.08535	0.0567595	1.5161	0.0368081
1021	chr1	62590400	62590549	FALSE	other	3.53758	2.20965e-08	0.909091	0.111168	0.0228569	0.987915
1022	chr1	62590650	62590949	FALSE	other	2.93788	2.61906e-06	0.647844	0.258201	0.671905	0.554774
1023	chr1	62591600	62591749	FALSE	other	2.91231	3.17379e-06	0.720223	0.207832	1.16514	0.15721
1024	chr1	62644450	62644799	FALSE	Stable	2.95513	2.3079e-06	1.778	0.00177625	0.919564	0.329811
1025	chr1	62645650	62645899	FALSE	Stable	2.10403	0.000662237	2.15305	0.000157333	0.503409	0.688148
1026	chr1	62647650	62647949	TRUE	Stable	2.80147	7.11419e-06	1.78606	0.00169238	0.984265	0.277606
1027	chr1	62648550	62649149	TRUE	Stable	3.04347	1.18969e-06	2.86857	5.66929e-07	1.13891	0.171957
1028	chr1	62702550	62702649	FALSE	other	1.77721	0.00393365	0.967142	0.0899606	1.19603	0.140542
1029	chr1	62702700	62703749	FALSE	Stable	3.73009	4.14086e-09	3.13422	5.1288e-08	0.717172	0.513006
1030	chr1	62703850	62703999	FALSE	Stable	1.885	0.00224373	2.4787	1.42273e-05	0.597813	0.616805
1031	chr1	62704100	62704299	FALSE	Stable	2.51529	5.12546e-05	1.13285	0.0467049	1.02814	0.244657
1032	chr1	62705250	62705449	FALSE	other	2.04675	0.00092098	1.09453	0.0546923	0.723551	0.506896
1033	chr1	62705550	62705949	FALSE	Stable	2.73268	1.15987e-05	1.97364	0.000526357	0.915807	0.333009
1034	chr1	62706050	62706699	FALSE	Stable	2.88454	3.90124e-06	2.43278	2.02755e-05	0.800176	0.435732
1035	chr1	62706750	62706849	FALSE	other	2.70691	1.39203e-05	1.0248	0.0721439	1.23733	0.121122
1036	chr1	62707100	62707449	FALSE	Stable	2.52619	4.7712e-05	3.43993	2.70068e-09	0.382389	0.767347
1037	chr1	62760200	62760499	FALSE	Stable	2.54735	4.16627e-05	2.09014	0.000243001	-0.0628371	0.966061
1038	chr1	62760900	62761099	FALSE	other	0.627722	0.308181	3.68877	2.09518e-10	-1.07358	0.212816
1039	chr1	62766500	62766799	TRUE	Stable	1.39839	0.0230135	3.06581	9.70191e-08	-0.439551	0.73141
1040	chr1	62767050	62767849	TRUE	Stable	3.16321	4.69493e-07	3.13555	5.0795e-08	-0.217344	0.872607
1041	chr1	62768050	62768199	FALSE	Stable	2.04096	0.000950943	2.82631	8.16784e-07	-0.223948	0.86806
1042	chr1	62791550	62791799	FALSE	Stable	1.6607	0.0070043	2.72139	1.99722e-06	0.49791	0.691811
1043	chr1	62792350	62792449	FALSE	Stable	3.02083	1.40775e-06	2.42051	2.22191e-05	-0.41212	0.747768
1044	chr1	62794450	62794549	FALSE	other	3.08598	8.54831e-07	0.550048	0.338245	0.517318	0.678288
1045	chr1	62860000	62860199	FALSE	Stable	2.62047	2.52488e-05	2.6171	4.72666e-06	-0.606488	0.609785
1046	chr1	62860350	62860999	FALSE	Stable	2.89888	3.50569e-06	3.05337	1.0861e-07	-0.191837	0.888314
1047	chr1	62861400	62861499	FALSE	other	2.41301	9.9813e-05	1.10245	0.0529963	-0.303417	0.815814
1048	chr1	62887100	62887249	FALSE	Stable	2.57467	3.45226e-05	1.13501	0.0462763	1.08536	0.205542
1049	chr1	62887950	62888149	FALSE	Stable	2.0781	0.000770404	2.24018	8.50777e-05	0.481519	0.703763
1050	chr1	62888250	62888749	FALSE	Stable	3.2974	1.61206e-07	2.39085	2.79003e-05	0.870233	0.371386
1051	chr1	62956400	62956499	FALSE	Stable	3.53209	2.30486e-08	1.98421	0.000492154	0.53544	0.66643
1052	chr1	63113150	63113999	FALSE	Stable	4.56339	1.29014e-12	4.01202	6.10087e-12	0.344781	0.789519
1053	chr1	63114100	63115149	FALSE	Stable	3.5438	2.10303e-08	3.21413	2.43223e-08	0.383971	0.766049
1054	chr1	63176200	63177749	FALSE	Stable	4.63325	6.30347e-13	3.923	1.65144e-11	0.56714	0.642535
1055	chr1	63177900	63177999	FALSE	other	1.08578	0.077553	0.0577831	0.920805	-0.176491	0.898341
1056	chr1	63245950	63246149	FALSE	other	0.33101	0.592514	3.58358	6.23913e-10	-0.459543	0.719041
1057	chr1	63246700	63247149	TRUE	Stable	2.18307	0.000415996	2.36509	3.39008e-05	0.144444	0.917148
1058	chr1	63247450	63248249	TRUE	Stable	2.63677	2.26056e-05	3.17875	3.39596e-08	0.00404547	0.997753
1059	chr1	63248300	63248599	FALSE	Stable	2.31746	0.000183365	2.6648	3.19865e-06	0.202096	0.881493
1060	chr1	63255550	63255649	FALSE	HH_dep	2.27587	0.000237292	-0.239171	0.680972	1.48809	0.0423182
1061	chr1	63273250	63273649	FALSE	Stable	2.18142	0.00041994	2.89451	4.52041e-07	0.0279398	0.985928
1062	chr1	63367500	63367949	FALSE	Stable	2.04731	0.000918156	3.30035	1.06338e-08	-0.28627	0.825698
1063	chr1	63368100	63368199	FALSE	Stable	3.38716	7.73826e-08	1.61491	0.00451646	0.759813	0.472445
1064	chr1	63368250	63368449	FALSE	other	1.03529	0.0922827	3.1726	3.58577e-08	-0.356719	0.782889
1065	chr1	63368650	63368949	TRUE	Stable	4.34153	1.26973e-11	1.67356	0.00326292	0.326197	0.800917
1066	chr1	63369450	63369749	TRUE	Stable	3.13007	6.1055e-07	2.23492	8.83362e-05	-0.136643	0.921929
1067	chr1	63414050	63414249	FALSE	Stable	2.5933	3.04067e-05	2.51315	1.08286e-05	-0.364628	0.778231
1068	chr1	63414350	63414599	FALSE	Stable	2.7703	8.92394e-06	1.96913	0.000541869	1.03043	0.242842
1069	chr1	63414650	63414999	FALSE	Stable	4.12295	1.08379e-10	1.44729	0.0109656	0.185361	0.892483
1070	chr1	63415150	63415399	FALSE	Stable	2.44782	7.97659e-05	2.2211	9.76146e-05	0.193505	0.887239
1071	chr1	63552150	63552249	FALSE	Stable	2.51893	5.00147e-05	2.00698	0.000423439	0.48426	0.701491
1072	chr1	63552450	63553049	FALSE	Stable	3.53795	2.20781e-08	2.98071	2.09907e-07	0.0371988	0.981232
1073	chr1	63553400	63553949	FALSE	Stable	2.52183	4.90739e-05	3.22967	2.09554e-08	0.256161	0.84448
1074	chr1	63555550	63555699	FALSE	other	0.879977	0.152666	2.00395	0.000432249	-0.562574	0.646168
1075	chr1	63730350	63731049	FALSE	Stable	3.39121	7.50557e-08	3.82918	4.61435e-11	0.641407	0.580257
1076	chr1	63765950	63766049	FALSE	Stable	3.12404	6.37917e-07	2.30576	5.26586e-05	-0.194153	0.886981
1077	chr1	63767650	63768199	FALSE	Stable	3.08203	8.8114e-07	2.26696	7.02317e-05	-0.0299132	0.985211
1078	chr1	63768350	63768699	FALSE	Stable	2.86603	4.4766e-06	2.15064	0.000160028	-0.436889	0.732914
1079	chr1	63768850	63769249	FALSE	Stable	1.68644	0.00617894	2.91626	3.73034e-07	-0.416536	0.745603
1080	chr1	63776950	63777099	FALSE	other	0.532511	0.38764	2.28879	5.96224e-05	-0.781242	0.453243
1081	chr1	63809250	63809649	FALSE	Stable	2.49036	6.05643e-05	3.18208	3.29026e-08	0.277797	0.830836
1082	chr1	63809850	63809999	FALSE	other	3.92493	7.04911e-10	0.451099	0.433665	1.13206	0.175958
1083	chr1	63977050	63977149	FALSE	other	3.48975	3.31035e-08	-0.0788686	0.892898	1.22684	0.125963
1084	chr1	63994350	63994599	FALSE	other	4.26587	2.70655e-11	0.883315	0.121747	1.04078	0.234913
1085	chr1	64066500	64066699	FALSE	Stable	2.52471	4.81471e-05	2.72707	1.90522e-06	-0.812218	0.424948
1086	chr1	64087550	64087799	FALSE	other	2.39861	0.000109558	0.40856	0.478942	1.22211	0.128074
1087	chr1	64088300	64088499	FALSE	other	3.80159	2.17009e-09	-0.0543797	0.925646	0.664005	0.5609
1088	chr1	64120500	64120599	FALSE	other	3.98942	3.86262e-10	1.0248	0.0721439	0.946007	0.307807
1089	chr1	64120650	64121499	FALSE	Stable	3.5284	2.38047e-08	3.78497	7.47186e-11	0.026243	0.986486
1090	chr1	64121600	64123099	FALSE	Stable	5.17993	1.77189e-15	5.2522	9.73014e-19	0.1717	0.90103
1091	chr1	64164100	64164199	FALSE	Stable	3.08598	8.54831e-07	1.45658	0.0104589	0.027879	0.985936
1092	chr1	64189000	64189149	FALSE	Stable	3.02083	1.40775e-06	1.82799	0.00131532	0.1804	0.896159
1093	chr1	64532100	64533349	FALSE	Stable	4.36744	9.75659e-12	4.32166	1.6888e-13	0.559228	0.648315
1094	chr1	64533400	64534049	FALSE	Stable	4.76939	1.44686e-13	3.68445	2.17928e-10	0.371817	0.773808
1095	chr1	64616500	64617799	TRUE	Stable	4.12643	1.04925e-10	3.25011	1.72206e-08	0.573282	0.638056
1096	chr1	64618100	64618199	FALSE	Stable	1.80399	0.00342656	2.23731	8.68139e-05	0.862813	0.37845
1097	chr1	64658750	64658899	FALSE	other	2.77303	8.74545e-06	0.326301	0.573145	0.832756	0.405993
1098	chr1	64677200	64677349	FALSE	HH_dep	2.20794	0.000358677	-0.764049	0.181387	2.61768	1.53623e-05
1099	chr1	64690200	64690549	FALSE	Stable	2.9109	3.20683e-06	2.94765	2.82545e-07	0.606847	0.60957
1100	chr1	64691050	64691649	FALSE	Stable	3.08554	8.57938e-07	2.92288	3.5231e-07	0.511075	0.682761
1101	chr1	64916750	64916849	FALSE	other	0.545598	0.37618	0.942703	0.0984152	0.164292	0.906125
1102	chr1	64956250	64956999	FALSE	Stable	3.53176	2.30971e-08	2.69759	2.43585e-06	0.533378	0.66811
1103	chr1	64975550	64975699	FALSE	Stable	2.25604	0.000268234	1.96693	0.000549404	-0.320757	0.804452
1104	chr1	65178550	65179099	TRUE	Stable	3.78195	2.59958e-09	3.61766	4.41135e-10	0.586838	0.626583
1105	chr1	65179300	65179849	TRUE	Stable	3.07141	9.55876e-07	1.98458	0.0004913	0.218664	0.871722
1106	chr1	65186100	65186399	FALSE	Stable	1.44254	0.0190387	2.86953	5.61966e-07	0.0230642	0.987837
1107	chr1	65186750	65187149	FALSE	Stable	2.81198	6.59598e-06	2.60769	5.1033e-06	0.361066	0.7807
1108	chr1	66000700	66000799	FALSE	other	2.69929	1.46573e-05	0.545206	0.342506	1.14165	0.170731
1109	chr1	66004800	66004999	FALSE	other	3.56584	1.73455e-08	0.483171	0.401081	0.254062	0.8462
1110	chr1	66245600	66245699	FALSE	Stable	1.70161	0.00573579	1.96053	0.000572663	0.302474	0.816462
1111	chr1	66251650	66251849	FALSE	Stable	2.0132	0.0011131	1.79424	0.00161282	0.508906	0.684018
1112	chr1	66251950	66252199	FALSE	Stable	1.90849	0.00197627	3.08208	8.34407e-08	0.607003	0.60957
1113	chr1	66321100	66321199	FALSE	other	3.5852	1.46987e-08	0.599749	0.29572	1.38393	0.0674448
1114	chr1	66321500	66321699	FALSE	Stable	3.6148	1.14343e-08	2.10213	0.000223594	-0.088859	0.950971
1115	chr1	66321750	66322099	FALSE	Stable	2.69757	1.48322e-05	1.80142	0.00154695	0.122957	0.929817
1116	chr1	66328850	66329149	FALSE	Stable	2.90018	3.47053e-06	1.96087	0.000572062	-0.0924793	0.948727
1117	chr1	66330600	66330999	FALSE	Stable	3.97465	4.45022e-10	2.21517	0.000101795	0.311619	0.810514
1118	chr1	66371200	66371349	FALSE	Stable	2.53547	4.47917e-05	1.81404	0.00143243	-0.291002	0.823292
1119	chr1	66371950	66372499	FALSE	Stable	3.24825	2.39581e-07	3.0024	1.73035e-07	0.218171	0.872182
1120	chr1	66395150	66395449	FALSE	other	1.17275	0.0565646	4.11278	1.91794e-12	-0.368991	0.775599
1121	chr1	66617900	66618049	FALSE	other	2.85414	4.87099e-06	0.130484	0.822936	1.12214	0.18202
1122	chr1	66700850	66701199	FALSE	Stable	2.84304	5.27852e-06	1.9072	0.000804577	0.576985	0.634751
1123	chr1	66815650	66815799	FALSE	Stable	2.71259	1.33767e-05	2.33582	4.21846e-05	0.349082	0.787518
1124	chr1	66815850	66817599	TRUE	Stable	4.66867	4.30702e-13	4.04968	4.00045e-12	0.274811	0.832476
1125	chr1	66863100	66863249	FALSE	Stable	3.14188	5.54723e-07	2.11832	0.000200234	0.413703	0.747227
1126	chr1	66897750	66897849	FALSE	other	1.13173	0.0658072	0.145063	0.803852	0.541888	0.661983
1127	chr1	66941300	66941749	FALSE	Stable	2.18249	0.000417524	3.83702	4.21553e-11	-0.0959271	0.946503
1128	chr1	67038650	67038799	FALSE	Stable	2.86343	4.55378e-06	1.60766	0.00470151	0.228819	0.864794
1129	chr1	67044550	67045149	FALSE	Stable	1.92872	0.00177561	3.21296	2.46003e-08	-0.791192	0.444313
1130	chr1	67045500	67045849	FALSE	Stable	1.81418	0.00325031	3.56132	7.88044e-10	-0.777616	0.456758
1131	chr1	67046350	67046599	FALSE	other	0.98711	0.108559	3.19312	2.96473e-08	-1.23097	0.124194
1132	chr1	67051750	67052799	FALSE	Stable	3.40946	6.47124e-08	3.21063	2.51947e-08	0.38189	0.767524
1133	chr1	67053100	67053899	FALSE	Stable	3.38579	7.82717e-08	3.91299	1.8447e-11	0.265167	0.838583
1134	chr1	67103400	67103899	FALSE	Stable	4.18233	6.14154e-11	1.9898	0.000474321	0.284396	0.826855
1135	chr1	67104150	67104649	FALSE	Stable	4.83912	6.99432e-14	2.61065	4.9817e-06	0.391522	0.761128
1136	chr1	67159700	67159849	FALSE	Stable	1.82166	0.00312753	1.63154	0.00412305	0.576071	0.635554
1137	chr1	67160000	67160149	FALSE	Stable	3.36018	9.72005e-08	1.45325	0.0106325	0.894491	0.350627
1138	chr1	67173350	67173549	TRUE	HH_dep	3.75933	3.19033e-09	0.459183	0.425257	1.69862	0.0141552
1139	chr1	67193550	67193749	FALSE	Stable	3.96177	5.03242e-10	1.20648	0.034083	0.736676	0.494421
1140	chr1	67194500	67194599	FALSE	other	3.30819	1.47805e-07	0.00214652	0.996917	1.28743	0.100694
1141	chr1	67236250	67236649	FALSE	Stable	3.66666	7.28657e-09	2.46474	1.58395e-05	-0.148194	0.914597
1142	chr1	67464000	67464199	FALSE	HH_dep	3.33179	1.21872e-07	-0.784133	0.170048	1.77415	0.00915138
1143	chr1	67464600	67465099	FALSE	Stable	3.76342	3.07787e-09	1.89214	0.00088358	0.844335	0.395786
1144	chr1	67465650	67466049	FALSE	Stable	3.38966	7.59844e-08	1.28986	0.0234293	0.845026	0.395084
1145	chr1	67794900	67795049	FALSE	other	2.8613	4.62987e-06	0.959452	0.0925142	0.551731	0.654332
1146	chr1	67795400	67796149	FALSE	Stable	2.75982	9.5811e-06	5.04232	1.87374e-17	0.510524	0.683036
1147	chr1	67796700	67796949	FALSE	other	3.26896	2.03085e-07	0.731721	0.200777	0.518629	0.677201
1148	chr1	67797900	67798099	FALSE	Stable	3.34427	1.10116e-07	1.9132	0.000774681	-0.170448	0.901909
1149	chr1	68106150	68106249	FALSE	Stable	1.62552	0.00828899	1.82799	0.00131532	0.358921	0.781706
1150	chr1	69056800	69056949	FALSE	HH_dep	2.61322	2.65238e-05	-0.647201	0.258663	2.24798	0.000341285
1151	chr1	69466050	69466199	FALSE	Stable	1.32072	0.0317851	3.08847	7.84503e-08	0.21972	0.87106
1152	chr1	69466500	69467299	FALSE	Stable	3.6173	1.11952e-08	1.78292	0.00172562	-0.108169	0.938735
1153	chr1	69488350	69488449	FALSE	other	-0.0259185	0.966339	2.56223	7.35072e-06	-0.600674	0.614697
1154	chr1	69591150	69591399	FALSE	other	3.38476	7.8916e-08	1.06366	0.0619634	0.48415	0.701491
1155	chr1	69591550	69591649	FALSE	Stable	3.41207	6.33001e-08	3.19726	2.85263e-08	0.194031	0.886981
1156	chr1	69591850	69592199	FALSE	Stable	2.859	4.70473e-06	2.11719	0.000201795	0.707213	0.522301
1157	chr1	69687600	69688049	FALSE	Stable	3.70957	4.98566e-09	2.01824	0.00039281	-0.145618	0.916106
1158	chr1	69827000	69827149	FALSE	Stable	2.77383	8.69359e-06	2.80672	9.65916e-07	-0.0536684	0.972174
1159	chr1	69847000	69847099	FALSE	SHHnullonly	0.470445	0.446163	2.62735	4.34507e-06	-2.15691	0.000684649
1160	chr1	70442250	70442549	FALSE	Stable	2.9037	3.37738e-06	2.51273	1.08658e-05	-0.0538091	0.972025
1161	chr1	71102000	71102349	FALSE	Stable	2.69985	1.46186e-05	2.44112	1.89841e-05	0.00115095	0.99925
1162	chr1	71102400	71102949	FALSE	Stable	2.9913	1.76146e-06	3.4083	3.68368e-09	0.603126	0.612489
1163	chr1	71103200	71103599	FALSE	Stable	2.84536	5.18834e-06	2.95402	2.66353e-07	-0.144235	0.91733
1164	chr1	71109350	71109549	FALSE	other	0.744547	0.226379	2.9597	2.53403e-07	-0.434556	0.734112
1165	chr1	71111350	71111499	FALSE	other	0.0500365	0.935855	1.72169	0.00247088	-1.3817	0.0679889
1166	chr1	71556600	71557649	FALSE	Stable	3.45105	4.589e-08	2.9462	2.86255e-07	0.553348	0.652981
1167	chr1	71651000	71651549	FALSE	Stable	2.66308	1.89043e-05	2.20458	0.0001097	0.422188	0.741578
1168	chr1	71652050	71654499	TRUE	Stable	4.94942	2.19733e-14	4.70243	1.59386e-15	0.252629	0.84726
1169	chr1	71655600	71655699	FALSE	other	0.946152	0.123949	-0.267905	0.644338	0.769276	0.463553
1170	chr1	71682050	71682149	FALSE	Stable	2.3955	0.000111608	2.02475	0.000376389	-0.239107	0.857178
1171	chr1	71762900	71763649	FALSE	Stable	2.76747	9.09146e-06	3.24155	1.87038e-08	0.00419996	0.99765
1172	chr1	71763800	71764349	FALSE	Stable	1.45235	0.0182465	3.16365	3.90772e-08	-0.425638	0.739404
1173	chr1	71764400	71764499	FALSE	Stable	2.80497	6.9331e-06	1.75899	0.00198982	0.0190286	0.989685
1174	chr1	71788200	71788349	FALSE	Stable	2.71416	1.32299e-05	2.88555	4.89554e-07	-0.192168	0.887966
1175	chr1	71788950	71789299	FALSE	Stable	3.45787	4.32718e-08	2.30605	5.25867e-05	-0.198295	0.883874
1176	chr1	71800650	71800999	FALSE	Stable	1.31864	0.0320552	2.97796	2.15171e-07	-0.467808	0.713303
1177	chr1	71801500	71801699	FALSE	other	0.925843	0.132343	1.94513	0.000632437	-1.05043	0.227941
1178	chr1	71801950	71802199	FALSE	Stable	2.25449	0.000270513	2.97796	2.15171e-07	-0.751155	0.480829
1179	chr1	71836700	71838699	FALSE	Stable	4.07432	1.71914e-10	4.11842	1.80117e-12	0.0962907	0.94618
1180	chr1	71844950	71845149	FALSE	other	3.1684	4.50529e-07	1.0937	0.0548843	0.237754	0.858379
1181	chr1	71854050	71854199	FALSE	other	0.532511	0.38764	3.22509	2.18698e-08	-0.705105	0.52459
1182	chr1	71855200	71855299	FALSE	Stable	3.57954	1.54298e-08	1.71999	0.00249591	-0.746078	0.485783
1183	chr1	71855400	71855499	FALSE	other	1.05247	0.0871509	2.95593	2.61855e-07	-0.928419	0.322297
1184	chr1	71864300	71864499	FALSE	other	2.95486	2.30878e-06	0.614404	0.2839	0.321846	0.80393
1185	chr1	71865200	71865549	FALSE	HH_sens	2.31211	0.000189377	1.81992	0.00138225	1.46171	0.047612
1186	chr1	71866250	71866449	FALSE	Stable	4.22541	4.07162e-11	1.75193	0.00207366	0.871963	0.369769
1187	chr1	71877200	71877499	FALSE	Stable	2.14484	0.00052181	3.06234	1.00056e-07	-0.531543	0.669434
1188	chr1	71892800	71894699	FALSE	Stable	3.50788	2.83794e-08	3.43413	2.8433e-09	-0.0957932	0.946635
1189	chr1	71896700	71896949	FALSE	Stable	1.36858	0.026102	4.12776	1.61867e-12	-0.188142	0.890766
1190	chr1	71899150	71899349	FALSE	Stable	1.36798	0.0261673	3.25306	1.67399e-08	-0.326482	0.80072
1191	chr1	71953550	71953699	FALSE	other	3.08966	8.3259e-07	0.485841	0.39846	-0.00181483	0.998898
1192	chr1	71964750	71964899	FALSE	other	0.267265	0.666353	3.04342	1.18887e-07	-0.788679	0.446708
1193	chr1	72002100	72002449	FALSE	Stable	1.89547	0.00212129	3.71463	1.5885e-10	0.323471	0.80283
1194	chr1	72002700	72002849	FALSE	Stable	2.65006	2.0594e-05	3.85421	3.49735e-11	0.369683	0.774958
1195	chr1	72018750	72018849	FALSE	Stable	2.53791	4.40772e-05	3.0581	1.03852e-07	-0.520194	0.676448
1196	chr1	72033250	72033349	FALSE	other	2.27587	0.000237292	0.0420889	0.942334	1.20683	0.135584
1197	chr1	72038350	72038549	FALSE	Stable	3.61214	1.16953e-08	1.61374	0.0045443	-0.607232	0.609404
1198	chr1	72052300	72052649	FALSE	Stable	2.5767	3.4055e-05	1.9448	0.000633794	-0.402324	0.754104
1199	chr1	72052850	72052999	FALSE	Stable	1.63309	0.00800875	2.39961	2.60524e-05	-0.380564	0.768321
1200	chr1	72059750	72061599	FALSE	Stable	3.89434	9.36031e-10	4.01044	6.20785e-12	0.0139855	0.992083
1201	chr1	72106000	72106199	FALSE	other	0.89222	0.147077	3.13738	4.99454e-08	-0.686558	0.541314
1202	chr1	72107550	72107799	FALSE	Stable	2.65348	2.01327e-05	1.8479	0.00116528	0.0376397	0.980991
1203	chr1	72108100	72108299	FALSE	Stable	1.57568	0.0104769	2.28662	6.05714e-05	-0.158517	0.909086
1204	chr1	72109200	72109299	FALSE	other	2.57418	3.45958e-05	0.53195	0.354658	0.428261	0.737805
1205	chr1	72109950	72110049	FALSE	Stable	3.08966	8.3259e-07	1.74286	0.00218617	0.33436	0.795552
1206	chr1	72198250	72198399	FALSE	Stable	1.85331	0.00265223	2.60321	5.28298e-06	-0.363943	0.778796
1207	chr1	72225700	72226399	FALSE	Stable	4.28804	2.17209e-11	4.18801	8.04865e-13	0.617051	0.601501
1208	chr1	72236500	72237099	FALSE	Stable	4.83893	7.00428e-14	4.73943	9.7945e-16	0.547102	0.658501
1209	chr1	72243500	72244449	TRUE	Stable	5.40061	1.43434e-16	4.9754	4.75154e-17	0.50576	0.68662
1210	chr1	72254550	72255349	TRUE	Stable	4.7767	1.34369e-13	5.06412	1.37894e-17	0.600438	0.614722
1211	chr1	72255800	72255949	FALSE	Stable	2.41546	9.83939e-05	3.46319	2.12621e-09	0.939744	0.312765
1212	chr1	72306550	72307899	TRUE	Stable	3.77849	2.68231e-09	3.53686	1.00745e-09	0.317281	0.806579
1213	chr1	72308200	72308349	FALSE	Stable	2.48136	6.41678e-05	1.78606	0.00169238	0.664154	0.560706
1214	chr1	72308800	72309799	FALSE	Stable	3.45026	4.61322e-08	2.04168	0.000336682	-0.115787	0.933763
1215	chr1	72309950	72310849	FALSE	Stable	3.25378	2.29192e-07	3.98364	8.38154e-12	-0.0665389	0.964165
1216	chr1	72456800	72456999	FALSE	Stable	2.33014	0.000169033	1.60035	0.00489681	-0.718074	0.511999
1217	chr1	72567250	72567449	FALSE	Stable	1.96165	0.00148312	1.50458	0.00817046	0.429386	0.736933
1218	chr1	72577100	72577299	FALSE	Stable	2.53968	4.35836e-05	1.68564	0.00304343	0.822892	0.415705
1219	chr1	72578450	72578549	FALSE	Stable	1.72825	0.00502695	2.16368	0.00014608	1.13841	0.17212
1220	chr1	72583250	72583349	FALSE	Stable	2.72412	1.23352e-05	1.72169	0.00247088	0.557654	0.649719
1221	chr1	72641300	72641449	FALSE	other	1.96092	0.00148845	0.586807	0.306462	0.339898	0.792296
1222	chr1	72711050	72712049	FALSE	Stable	3.77817	2.68959e-09	3.03642	1.26923e-07	0.460969	0.718195
1223	chr1	72730600	72730749	FALSE	other	0.962433	0.117721	3.23148	2.05771e-08	-1.29401	0.0985209
1224	chr1	72790800	72790899	FALSE	other	0.273955	0.658575	0.960709	0.0920806	-0.71444	0.51497
1225	chr1	72791450	72791649	FALSE	other	1.12562	0.0672194	2.46115	1.628e-05	-0.7831	0.451465
1226	chr1	72805650	72805999	FALSE	Stable	1.33961	0.0294291	2.53652	9.01526e-06	-0.358299	0.782027
1227	chr1	72806450	72806749	FALSE	Stable	2.1571	0.000485257	2.81978	8.63794e-07	-0.475279	0.708327
1228	chr1	72823800	72824249	FALSE	Stable	3.35869	9.83495e-08	2.62403	4.46393e-06	0.437591	0.732487
1229	chr1	72824800	72824949	FALSE	Stable	1.35859	0.0272136	2.00098	0.000440705	-0.262646	0.840267
1230	chr1	72826650	72827149	FALSE	Stable	2.65944	1.9369e-05	4.50085	1.94916e-14	-0.282813	0.827339
1231	chr1	72945150	72945249	FALSE	other	1.09851	0.0740943	1.27491	0.0250913	0.209551	0.877259
1232	chr1	72945700	72945999	FALSE	Stable	3.10846	7.1972e-07	1.38871	0.0146696	-0.117198	0.932905
1233	chr1	72952700	72953199	FALSE	Stable	1.72181	0.0051945	2.59025	5.88703e-06	0.0947798	0.947289
1234	chr1	72953450	72953999	FALSE	Stable	2.69393	1.52278e-05	2.8018	1.0082e-06	-0.00786517	0.996051
1235	chr1	72963150	72963499	FALSE	Stable	3.85081	1.39859e-09	1.71074	0.00263252	0.231942	0.862127
1236	chr1	73026550	73026649	FALSE	Stable	1.98828	0.00128001	1.90807	0.000800192	0.0594305	0.968705
1237	chr1	73045900	73046199	FALSE	Stable	2.56344	3.72808e-05	2.28662	6.05714e-05	1.41328	0.0591373
1238	chr1	73046400	73046499	FALSE	HH_sens	1.55858	0.0113534	1.39349	0.0143374	1.46122	0.047703
1239	chr1	73054050	73054199	FALSE	Stable	2.59147	3.07647e-05	1.30593	0.0217638	0.675686	0.550758
1240	chr1	73251250	73252249	TRUE	Stable	3.3727	8.74504e-08	3.14934	4.47683e-08	-0.0373672	0.981183
1241	chr1	73252450	73252749	TRUE	Stable	2.72493	1.22641e-05	2.21666	0.000100704	0.0576152	0.969927
1242	chr1	73252800	73252899	FALSE	other	1.85692	0.00260194	0.611319	0.286399	0.532474	0.668711
1243	chr1	73307900	73308049	FALSE	other	0.284244	0.646445	1.92453	0.000721364	-0.933244	0.318586
1244	chr1	73361950	73362149	FALSE	Stable	2.34013	0.000158921	2.72248	1.97965e-06	-0.992203	0.270934
1245	chr1	73362500	73364849	TRUE	Stable	3.60654	1.22626e-08	3.68077	2.27104e-10	-0.28444	0.826855
1246	chr1	73365000	73365149	FALSE	Stable	1.30623	0.0337288	2.50335	1.17078e-05	-0.907164	0.340299
1247	chr1	73382000	73382149	FALSE	other	1.18433	0.054153	3.49076	1.61396e-09	0.0021335	0.998688
1248	chr1	73480200	73480399	FALSE	other	-0.212438	0.732115	2.57115	6.85612e-06	-1.22498	0.126871
1249	chr1	73514100	73514249	FALSE	Stable	1.46215	0.0174837	1.98357	0.000494078	-1.13128	0.176528
1250	chr1	73538400	73538499	FALSE	Stable	3.08598	8.54831e-07	2.24582	8.16551e-05	-0.172274	0.900777
1251	chr1	73538800	73539249	FALSE	Stable	2.2561	0.000268234	2.29296	5.78656e-05	-0.556909	0.650343
1252	chr1	73618200	73618299	FALSE	Stable	1.76998	0.00407871	1.89501	0.000867737	-1.13747	0.172593
1253	chr1	73743700	73743799	FALSE	Stable	2.88653	3.84344e-06	1.42789	0.0120867	0.108527	0.938603
1254	chr1	73743950	73744099	FALSE	Stable	2.40416	0.000105617	2.75951	1.44912e-06	0.0306051	0.984798
1255	chr1	73744200	73744849	FALSE	Stable	3.45355	4.49464e-08	3.52599	1.12464e-09	0.543177	0.660979
1256	chr1	73745000	73745099	FALSE	Stable	1.73567	0.00484319	2.21475	0.000102073	0.490432	0.696923
1257	chr1	73745150	73745249	FALSE	Stable	2.79006	7.72768e-06	2.96013	2.52542e-07	-0.190845	0.88917
1258	chr1	73757450	73759699	FALSE	Stable	3.37103	8.87316e-08	2.1988	0.000114249	0.961775	0.294305
1259	chr1	73765400	73765649	FALSE	other	3.40559	6.65649e-08	0.891233	0.118458	0.677405	0.549468
1260	chr1	73837600	73837799	FALSE	Stable	1.24636	0.0426959	3.65142	3.12141e-10	-0.432122	0.735407
1261	chr1	73862200	73863149	FALSE	Stable	2.89824	3.51999e-06	2.31168	5.04844e-05	0.395226	0.758816
1262	chr1	73863450	73863599	FALSE	other	2.65721	1.96503e-05	1.07286	0.0597288	0.557403	0.649875
1263	chr1	73864000	73864399	FALSE	Stable	3.34375	1.10513e-07	2.09679	0.000231915	0.405819	0.751393
1264	chr1	73864850	73864949	FALSE	SHHnullonly	0.646524	0.293987	1.20036	0.0350125	-1.58079	0.0269903
1265	chr1	73941800	73942099	FALSE	Stable	2.58438	3.22865e-05	1.91544	0.000763693	0.411374	0.748163
1266	chr1	73942300	73943099	FALSE	Stable	3.46155	4.1946e-08	1.81194	0.00144983	0.74838	0.483282
1267	chr1	73948300	73948499	FALSE	Stable	2.51658	5.0808e-05	2.49316	1.26908e-05	0.998463	0.265511
1268	chr1	73949250	73949349	FALSE	Stable	1.45154	0.0183095	2.05628	0.000305502	0.370297	0.774439
1269	chr1	73963400	73963549	FALSE	Stable	2.62891	2.38721e-05	1.83143	0.00128863	0.18762	0.891024
1270	chr1	73970700	73970849	FALSE	Stable	1.77196	0.00404355	2.56063	7.4441e-06	0.769927	0.463016
1271	chr1	74000150	74000349	FALSE	Stable	1.87278	0.00239776	1.82013	0.00138037	0.342602	0.790533
1272	chr1	74000450	74000749	FALSE	Stable	2.68047	1.67134e-05	2.81894	8.69919e-07	0.83657	0.402556
1273	chr1	74001150	74001499	FALSE	Stable	3.01493	1.46977e-06	1.69475	0.00288845	0.965886	0.291466
1274	chr1	74027300	74028099	FALSE	Stable	3.4702	3.90353e-08	1.8229	0.00135697	0.549302	0.656055
1275	chr1	74028250	74028399	FALSE	other	2.14831	0.00051085	0.665948	0.245155	0.861437	0.379347
1276	chr1	74030350	74031149	FALSE	Stable	1.84397	0.00278773	3.58754	6.00529e-10	0.11218	0.936168
1277	chr1	74031450	74031949	FALSE	Stable	2.82662	5.92867e-06	2.55713	7.6607e-06	0.0944056	0.947446
1278	chr1	74032050	74032349	FALSE	Stable	1.58711	0.0099321	3.15343	4.30137e-08	0.27639	0.831828
1279	chr1	74040650	74043349	TRUE	Stable	3.98688	3.96815e-10	3.52523	1.13409e-09	0.365457	0.77778
1280	chr1	74043400	74043649	FALSE	Stable	2.66193	1.90481e-05	2.21646	0.000100835	0.41226	0.747768
1281	chr1	74043750	74043899	FALSE	Stable	1.87278	0.00239776	1.92453	0.000721364	0.655295	0.568667
1282	chr1	74051900	74052049	FALSE	other	2.57418	3.45958e-05	1.09955	0.0536249	0.447678	0.726264
1283	chr1	74052150	74052349	FALSE	Stable	3.20441	3.39503e-07	2.49227	1.27831e-05	0.691365	0.536286
1284	chr1	74053050	74053149	FALSE	Stable	2.22775	0.000318142	2.16815	0.000141622	0.0319176	0.98436
1285	chr1	74053850	74053949	FALSE	Stable	1.89728	0.00209992	2.91773	3.68388e-07	-0.0454111	0.976271
1286	chr1	74054250	74054399	FALSE	Stable	2.62891	2.38721e-05	2.13103	0.00018365	-0.111982	0.936297
1287	chr1	74089850	74090199	FALSE	Stable	2.98452	1.85277e-06	2.44182	1.88769e-05	0.188397	0.890466
1288	chr1	74090450	74093149	TRUE	Stable	4.2208	4.24238e-11	3.6893	2.08756e-10	0.112388	0.935968
1289	chr1	74098600	74098749	FALSE	other	4.07978	1.62959e-10	0.296912	0.608763	0.761171	0.47105
1290	chr1	74104300	74104449	FALSE	Stable	1.52909	0.0129666	2.47475	1.46587e-05	0.612936	0.604639
1291	chr1	74111250	74111399	FALSE	Stable	2.65453	1.99998e-05	1.87633	0.000975951	-0.248754	0.850192
1292	chr1	74232000	74232149	FALSE	Stable	2.61322	2.65238e-05	2.96287	2.46222e-07	-1.36209	0.0744316
1293	chr1	74236550	74237449	FALSE	Stable	3.42687	5.60388e-08	3.54398	9.40439e-10	0.465622	0.714304
1294	chr1	74248500	74248749	FALSE	other	0.625759	0.309671	2.8727	5.46489e-07	-1.27742	0.104381
1295	chr1	74249200	74249399	FALSE	Stable	2.2086	0.000357486	3.51508	1.259e-09	-0.331441	0.797737
1296	chr1	74284400	74284699	FALSE	Stable	1.48559	0.0157833	2.61036	4.99268e-06	0.011685	0.993624
1297	chr1	74295900	74295999	FALSE	Stable	3.6975	5.52587e-09	1.45817	0.0103795	0.220719	0.870613
1298	chr1	74357050	74357199	FALSE	Stable	3.44728	4.73213e-08	1.36894	0.0161463	0.0483079	0.974945
1299	chr1	74357350	74357799	FALSE	Stable	2.04029	0.000954348	2.87506	5.35007e-07	-0.0214857	0.988759
1300	chr1	74358400	74358899	FALSE	Stable	2.31778	0.000182983	2.86525	5.83513e-07	0.226942	0.865913
1301	chr1	74386550	74387499	TRUE	Stable	4.53235	1.77157e-12	3.60353	5.10892e-10	0.082543	0.955121
1302	chr1	74391200	74391699	TRUE	Stable	2.46343	7.22454e-05	2.52302	1.00082e-05	-0.0959098	0.946517
1303	chr1	74391750	74392399	TRUE	Stable	4.63486	6.20699e-13	4.15692	1.16572e-12	0.117563	0.932693
1304	chr1	74396650	74397399	FALSE	Stable	4.31714	1.61785e-11	3.4835	1.73649e-09	0.0586906	0.969214
1305	chr1	74397550	74398349	FALSE	Stable	3.13831	5.7082e-07	2.45282	1.73707e-05	0.17717	0.898075
1306	chr1	74505500	74505749	FALSE	Stable	2.1158	0.000617963	2.27959	6.38164e-05	0.314479	0.808308
1307	chr1	74505950	74507299	TRUE	Stable	4.73299	2.11246e-13	4.45692	3.31776e-14	0.347209	0.788377
1308	chr1	74507350	74507549	FALSE	Stable	2.01335	0.00111214	1.39001	0.0145767	0.587759	0.625883
1309	chr1	74587300	74587549	TRUE	Stable	2.13316	0.000560197	1.82551	0.00133621	0.634109	0.586757
1310	chr1	74587600	74588049	TRUE	Stable	3.24549	2.44874e-07	2.42835	2.09798e-05	0.516342	0.679279
1311	chr1	74601100	74601249	FALSE	Stable	1.42577	0.0204853	1.22252	0.0317873	0.168657	0.903265
1312	chr1	74601550	74601749	FALSE	Stable	3.00359	1.60321e-06	2.11354	0.000206883	-0.460063	0.718668
1313	chr1	74661700	74662699	FALSE	Stable	3.77773	2.7002e-09	3.38158	4.79562e-09	0.427075	0.738445
1314	chr1	74712750	74713199	FALSE	Stable	3.32063	1.3349e-07	2.33693	4.18608e-05	0.169056	0.902967
1315	chr1	74713250	74713999	FALSE	Stable	3.24484	2.45716e-07	3.23242	2.03981e-08	0.236535	0.859393
1316	chr1	74714950	74716399	FALSE	Stable	3.55521	1.90347e-08	3.3849	4.65161e-09	-0.132348	0.924548
1317	chr1	74716850	74717049	FALSE	Stable	1.74801	0.00454789	2.70563	2.2796e-06	0.0174113	0.990353
1318	chr1	74816750	74816899	FALSE	Stable	2.34206	0.000157077	2.0392	0.000342124	1.0099	0.256877
1319	chr1	74817100	74817599	FALSE	Stable	2.57284	3.49058e-05	2.90536	4.10663e-07	-0.0802491	0.95638
1320	chr1	74965500	74965699	FALSE	other	-0.37216	0.547182	2.32864	4.45088e-05	-1.31695	0.0895058
1321	chr1	75124250	75125449	TRUE	Stable	4.10885	1.23783e-10	3.11482	6.15178e-08	0.398116	0.756729
1322	chr1	75142000	75142099	FALSE	HH_dep	2.16796	0.00045527	0.261562	0.652532	1.55209	0.0311282
1323	chr1	75142350	75142749	FALSE	Stable	2.54279	4.28169e-05	3.14867	4.5073e-08	-0.127601	0.92707
1324	chr1	75142800	75143049	FALSE	Stable	2.53044	4.6413e-05	2.32446	4.59378e-05	0.169087	0.902926
1325	chr1	75168850	75168949	FALSE	Stable	1.91474	0.00191039	2.93649	3.12048e-07	-0.0300914	0.985074
1326	chr1	75191400	75191599	FALSE	other	3.80261	2.15665e-09	0.769206	0.178451	0.204794	0.879985
1327	chr1	75210850	75211149	FALSE	Stable	2.8056	6.90215e-06	2.56774	7.04176e-06	0.425262	0.739735
1328	chr1	75236100	75236249	FALSE	Stable	2.2933	0.00021339	2.94492	2.89361e-07	-0.0902168	0.950201
1329	chr1	75236500	75236849	FALSE	Stable	2.73443	1.14722e-05	2.71988	2.02169e-06	0.394291	0.759219
1330	chr1	75237050	75237199	FALSE	Stable	2.89309	3.65469e-06	1.14541	0.0442881	0.397565	0.757274
1331	chr1	75316700	75316799	FALSE	Stable	2.44144	8.31713e-05	1.6144	0.00452829	0.382258	0.767388
1332	chr1	75317050	75317499	FALSE	Stable	4.5039	2.39661e-12	2.16905	0.000140797	0.564452	0.644929
1333	chr1	75318150	75318449	FALSE	Stable	2.93087	2.761e-06	2.26155	7.30391e-05	0.634722	0.586332
1334	chr1	75343800	75344299	FALSE	Stable	2.38995	0.000115777	3.15168	4.37427e-08	-0.0206976	0.989222
1335	chr1	75344400	75345299	FALSE	Stable	3.75313	3.36889e-09	2.55637	7.70839e-06	0.23225	0.861983
1336	chr1	75380900	75381049	FALSE	other	1.0401	0.0907812	2.47223	1.49523e-05	-0.462605	0.716659
1337	chr1	75399500	75399949	TRUE	Stable	1.9057	0.00200745	2.68343	2.7452e-06	0.0608777	0.967665
1338	chr1	75400200	75400799	TRUE	Stable	2.70946	1.36891e-05	2.20566	0.000108832	0.0511934	0.973681
1339	chr1	75478850	75479299	FALSE	Stable	2.99057	1.77066e-06	2.20508	0.000109296	0.484688	0.701253
1340	chr1	75505600	75506799	FALSE	Stable	4.16362	7.35444e-11	3.61974	4.32758e-10	0.449505	0.725585
1341	chr1	75511300	75511449	FALSE	Stable	2.50966	5.32544e-05	2.1063	0.000217605	0.0490647	0.974532
1342	chr1	75511800	75512149	FALSE	Stable	3.09376	8.0708e-07	2.04136	0.000337447	-0.469411	0.71228
1343	chr1	75520650	75521899	TRUE	Stable	4.5937	9.39864e-13	3.30662	9.99782e-09	0.189081	0.890042
1344	chr1	75546100	75546799	FALSE	Stable	3.12382	6.38844e-07	3.77182	8.58739e-11	-0.169722	0.902398
1345	chr1	75559050	75559499	FALSE	Stable	2.02659	0.00103241	2.67377	2.97249e-06	-0.154136	0.911369
1346	chr1	75581100	75582149	FALSE	Stable	3.42672	5.61161e-08	2.25124	7.85629e-05	1.13743	0.172593
1347	chr1	75582250	75582749	FALSE	Stable	3.16903	4.48465e-07	2.67092	3.04405e-06	1.11373	0.187894
1348	chr1	75582900	75583049	FALSE	other	2.72399	1.23434e-05	0.789273	0.167231	0.900502	0.345766
1349	chr1	75652950	75653749	FALSE	Stable	3.45368	4.48915e-08	1.61971	0.00440127	0.65777	0.565956
1350	chr1	75653800	75654049	FALSE	Stable	4.02401	2.78061e-10	2.29484	5.70696e-05	0.37906	0.769149
1351	chr1	75654250	75654549	FALSE	Stable	2.52183	4.90739e-05	1.5689	0.00580996	0.695357	0.532487
1352	chr1	75655100	75655249	FALSE	Stable	2.30696	0.000195568	1.92406	0.000722968	0.362129	0.77976
1353	chr1	75668150	75668299	TRUE	HH_dep	2.58602	3.19069e-05	-0.357998	0.535946	2.49924	4.16703e-05
1354	chr1	75693000	75693449	FALSE	Stable	4.33805	1.31804e-11	1.60646	0.0047335	-0.206762	0.878708
1355	chr1	75694000	75694099	FALSE	Stable	1.23055	0.0454211	1.1706	0.0398369	0.0253594	0.986836
1356	chr1	75695400	75695549	FALSE	Stable	2.5017	5.6194e-05	1.55955	0.00611508	0.174213	0.899525
1357	chr1	75738050	75738799	FALSE	Stable	2.00717	0.00115087	3.72418	1.43607e-10	-0.0165912	0.990694
1358	chr1	75741750	75741849	FALSE	other	1.97075	0.001412	1.0315	0.0703232	0.329397	0.799182
1359	chr1	75743700	75743899	FALSE	Stable	3.46326	4.13522e-08	2.10692	0.000216667	0.343899	0.790098
1360	chr1	75749700	75749899	FALSE	other	0.77395	0.208487	3.34928	6.60185e-09	0.410045	0.749172
1361	chr1	75750200	75750299	FALSE	Stable	1.35615	0.0274847	1.55811	0.00616312	0.184001	0.893385
1362	chr1	75750600	75750849	FALSE	other	0.623358	0.31153	3.66632	2.66357e-10	-1.05548	0.224091
1363	chr1	75770100	75770349	FALSE	Stable	2.70741	1.38827e-05	2.00159	0.000439007	1.09178	0.201436
1364	chr1	75770600	75770799	FALSE	other	2.25449	0.000270513	1.03176	0.0702793	0.925662	0.324859
1365	chr1	75770950	75771099	FALSE	Stable	1.94396	0.0016313	2.72139	1.99722e-06	0.5187	0.677181
1366	chr1	75771250	75771349	FALSE	other	3.02519	1.36397e-06	1.02832	0.0712063	1.22893	0.1252
1367	chr1	75771500	75771699	FALSE	other	2.62872	2.39049e-05	0.889056	0.119372	1.28901	0.100298
1368	chr1	75771750	75773099	FALSE	Stable	4.06741	1.84362e-10	2.96246	2.47118e-07	0.949627	0.304832
1369	chr1	75773350	75773599	FALSE	Stable	2.54619	4.19743e-05	2.19955	0.000113618	-0.00766826	0.996175
1370	chr1	75773750	75774099	FALSE	Stable	2.6911	1.55195e-05	1.94784	0.000621346	1.22153	0.128237
1371	chr1	75777000	75777149	FALSE	other	2.44862	7.93452e-05	0.178745	0.759248	0.239838	0.856406
1372	chr1	75778800	75779249	FALSE	Stable	5.098	4.3064e-15	2.63551	4.0767e-06	0.443878	0.728381
1373	chr1	75780900	75780999	FALSE	other	2.7746	8.64833e-06	-0.251428	0.665564	0.4204	0.74258
1374	chr1	75783600	75783849	FALSE	other	3.18577	3.92899e-07	0.167243	0.774513	0.528226	0.672362
1375	chr1	75784300	75784499	FALSE	Stable	2.52795	4.7222e-05	1.50188	0.00828786	0.671775	0.554778
1376	chr1	75784550	75784749	FALSE	Stable	1.33598	0.0298607	3.95736	1.11927e-11	0.363997	0.778796
1377	chr1	75785000	75785249	FALSE	other	2.91946	3.01526e-06	0.993637	0.0814663	0.47796	0.706407
1378	chr1	75785500	75786449	FALSE	Stable	4.94664	2.25804e-14	2.96389	2.4409e-07	0.944895	0.308441
1379	chr1	75786550	75787599	FALSE	Stable	3.68118	6.40136e-09	3.07841	8.64819e-08	1.0938	0.199996
1380	chr1	75788050	75788699	FALSE	Stable	3.18728	3.88106e-07	1.60134	0.0048705	1.00695	0.259241
1381	chr1	75788800	75789499	FALSE	Stable	2.51492	5.13907e-05	2.70622	2.26962e-06	0.472013	0.710153
1382	chr1	75803150	75803299	FALSE	Stable	3.43082	5.41806e-08	2.79657	1.05457e-06	0.0243934	0.987369
1383	chr1	75803550	75804099	FALSE	Stable	2.74744	1.04613e-05	3.32433	8.44443e-09	0.292708	0.82266
1384	chr1	75804200	75804449	FALSE	Stable	2.24538	0.000285709	3.30131	1.05406e-08	0.32793	0.800042
1385	chr1	75804900	75805149	FALSE	Stable	3.59168	1.39161e-08	2.40413	2.51656e-05	0.160602	0.907943
1386	chr1	75814650	75814749	FALSE	other	1.62155	0.00843466	0.783847	0.170142	0.816932	0.420468
1387	chr1	75818750	75818849	FALSE	Stable	1.92054	0.0018563	2.88045	5.11204e-07	-0.959908	0.295757
1388	chr1	75831900	75834649	TRUE	Stable	4.30734	1.78387e-11	3.43086	2.93115e-09	0.45131	0.724286
1389	chr1	75839350	75839599	FALSE	Stable	2.32808	0.00017123	2.85006	6.67868e-07	0.669529	0.556685
1390	chr1	75839800	75840199	FALSE	other	2.80218	7.07788e-06	0.976835	0.0867993	0.8807	0.362753
1391	chr1	75842450	75842549	FALSE	other	3.56584	1.73455e-08	0.397062	0.491627	0.827005	0.411562
1392	chr1	75844900	75845049	FALSE	Stable	2.10529	0.000657383	1.78798	0.00167356	0.703265	0.525767
1393	chr1	75885300	75885599	FALSE	Stable	3.66489	7.40172e-09	1.63036	0.0041498	0.684414	0.543565
1394	chr1	75888800	75889699	FALSE	Stable	4.12209	1.09272e-10	2.80724	9.6147e-07	0.794801	0.441476
1395	chr1	75890050	75890349	FALSE	Stable	2.81035	6.66989e-06	1.79649	0.00159127	0.493819	0.69455
1396	chr1	75891200	75891349	FALSE	Stable	2.75385	1.00053e-05	1.95352	0.000598552	0.35555	0.783344
1397	chr1	75926250	75926449	FALSE	Stable	3.4552	4.4318e-08	1.92348	0.000725525	0.504771	0.687254
1398	chr1	75979800	75979999	FALSE	Stable	2.40633	0.000104169	2.66736	3.13445e-06	-0.281806	0.827965
1399	chr1	75981000	75981349	FALSE	Stable	3.22921	2.77968e-07	3.10849	6.53489e-08	0.682114	0.545198
1400	chr1	75982000	75983099	FALSE	Stable	3.77197	2.84918e-09	2.87719	5.25753e-07	1.15579	0.162462
1401	chr1	75983300	75983399	FALSE	other	3.35449	1.01522e-07	0.291244	0.615752	0.721469	0.508941
1402	chr1	75983750	75984749	FALSE	Stable	4.15071	8.26505e-11	3.90144	2.09479e-11	1.01797	0.251261
1403	chr1	75984900	75985049	FALSE	Stable	3.40559	6.65649e-08	1.63561	0.00403289	0.419858	0.742726
1404	chr1	75985200	75985799	FALSE	Stable	3.43086	5.41806e-08	2.72481	1.94334e-06	0.448475	0.725842
1405	chr1	75997850	75997949	FALSE	other	2.12438	0.000588631	1.0501	0.0654064	0.0473212	0.975338
1406	chr1	75999950	76000049	FALSE	Stable	1.6618	0.00696928	2.81091	9.31433e-07	-0.157445	0.909465
1407	chr1	76008200	76008449	FALSE	Stable	2.66907	1.81424e-05	1.71847	0.00251823	0.332449	0.797001
1408	chr1	76008850	76009749	TRUE	Stable	4.03009	2.63099e-10	2.8014	1.01195e-06	0.315241	0.80782
1409	chr1	76009850	76011149	TRUE	Stable	3.75223	3.3957e-09	4.11839	1.80117e-12	0.388183	0.763209
1410	chr1	76011200	76011399	FALSE	Stable	2.17364	0.000440398	2.95363	2.67254e-07	0.186771	0.891478
1411	chr1	76011700	76011899	FALSE	Stable	3.18273	4.01989e-07	1.41094	0.0131553	0.323924	0.802471
1412	chr1	76021500	76021799	FALSE	Stable	1.96148	0.00148388	2.9797	2.11751e-07	-0.0431845	0.977541
1413	chr1	76030900	76031699	FALSE	Stable	3.34805	1.07045e-07	3.14541	4.65254e-08	0.625179	0.594189
1414	chr1	76032200	76032349	FALSE	Stable	1.70875	0.00553926	1.47823	0.00937164	-0.123781	0.929485
1415	chr1	76039550	76040049	FALSE	Stable	3.04816	1.14959e-06	1.69011	0.00296786	-0.356625	0.782927
1416	chr1	76049100	76049249	FALSE	other	0.893856	0.146328	2.98854	1.95307e-07	-0.536077	0.666073
1417	chr1	76050150	76050349	FALSE	other	0.782971	0.203251	2.31123	5.06215e-05	-0.714963	0.514699
1418	chr1	76050600	76050799	FALSE	Stable	2.69132	1.54933e-05	1.4438	0.0111522	0.479579	0.705195
1419	chr1	76064300	76064399	FALSE	other	-0.0596803	0.923674	2.18186	0.000128671	-0.945417	0.30813
1420	chr1	76064800	76064949	FALSE	Stable	1.91591	0.00190028	1.9373	0.000664131	-0.0490709	0.974532
1421	chr1	76065150	76065499	FALSE	Stable	1.83548	0.00291092	2.60769	5.1033e-06	-0.15658	0.910147
1422	chr1	76065550	76065699	FALSE	Stable	2.52472	4.81471e-05	1.77445	0.00181364	-0.0176726	0.990158
1423	chr1	76066000	76066549	FALSE	Stable	2.85592	4.81077e-06	2.60907	5.04582e-06	-0.294294	0.821992
1424	chr1	76077450	76077549	FALSE	other	2.32969	0.0001695	0.130484	0.822936	0.597681	0.617042
1425	chr1	76080150	76080249	FALSE	other	2.3955	0.000111608	0.792295	0.165538	0.576254	0.635424
1426	chr1	76080500	76080649	FALSE	Stable	4.44687	4.32956e-12	1.53215	0.00706555	0.896101	0.349292
1427	chr1	76106700	76106849	FALSE	Stable	1.36772	0.0261902	2.46434	1.58763e-05	-0.121583	0.930533
1428	chr1	76108100	76108249	FALSE	Stable	1.86762	0.00246047	2.4116	2.37953e-05	-0.575126	0.636592
1429	chr1	76138050	76138399	FALSE	Stable	4.04005	2.40095e-10	2.59787	5.52423e-06	0.832323	0.406543
1430	chr1	76197750	76197899	FALSE	other	3.75602	3.28548e-09	0.883315	0.121747	0.53093	0.669793
1431	chr1	76198300	76198499	FALSE	other	1.70919	0.00552813	-0.222689	0.70171	1.31372	0.0908459
1432	chr1	76222150	76222249	FALSE	other	1.41333	0.0215877	-0.753465	0.187645	0.552828	0.653305
1433	chr1	76246700	76246899	FALSE	other	2.07334	0.000791208	0.888835	0.11941	0.15755	0.909436
1434	chr1	76322500	76322699	FALSE	HH_dep	2.66188	1.90481e-05	1.0979	0.0539698	1.53629	0.0334928
1435	chr1	76323750	76323899	FALSE	HH_sens	2.91231	3.17379e-06	1.32142	0.0202608	1.57012	0.0284669
1436	chr1	76535400	76536299	FALSE	Stable	2.13492	0.000554536	3.11985	5.87761e-08	-0.160857	0.907864
1437	chr1	76547700	76547949	FALSE	Stable	3.51294	2.7138e-08	3.00087	1.75279e-07	-0.0977864	0.945156
1438	chr1	76548350	76548649	FALSE	Stable	3.20441	3.39503e-07	3.73053	1.34205e-10	-0.546895	0.658501
1439	chr1	76551550	76551699	FALSE	other	1.78294	0.00382153	0.40856	0.478942	0.0242668	0.987391
1440	chr1	76583200	76583299	FALSE	other	0.261409	0.673044	1.4672	0.00991763	-0.819835	0.418559
1441	chr1	76736600	76736899	FALSE	other	3.14618	5.35698e-07	0.665525	0.245448	1.0328	0.240936
1442	chr1	76829400	76829549	FALSE	other	1.36701	0.0262597	-0.0897721	0.878362	0.615651	0.602399
1443	chr1	76831950	76832149	FALSE	Stable	2.82927	5.81347e-06	1.83808	0.00123828	0.223248	0.868708
1444	chr1	76842800	76842949	FALSE	Stable	1.35	0.0281957	2.30617	5.25416e-05	0.339952	0.792296
1445	chr1	76843850	76844249	FALSE	Stable	3.42992	5.45944e-08	1.72944	0.00236397	0.401363	0.754499
1446	chr1	76864400	76864649	FALSE	Stable	2.65357	2.01327e-05	2.49657	1.23665e-05	0.12586	0.928193
1447	chr1	76865000	76865399	FALSE	Stable	3.30212	1.55049e-07	1.32961	0.0194817	0.202107	0.881493
1448	chr1	76865550	76866199	FALSE	Stable	3.15106	5.16086e-07	2.15094	0.000159708	0.793534	0.442345
1449	chr1	76866400	76867099	FALSE	Stable	3.81626	1.91659e-09	2.56964	6.93986e-06	0.431964	0.735559
1450	chr1	76894400	76894549	FALSE	other	2.10713	0.00065048	0.846237	0.138345	0.492952	0.695141
1451	chr1	76894900	76894999	FALSE	other	2.3586	0.000141323	0.869924	0.127632	-0.112844	0.935584
1452	chr1	76895400	76897299	FALSE	Stable	4.79825	1.08567e-13	3.7634	9.40494e-11	0.611579	0.606168
1453	chr1	76905550	76905799	FALSE	Stable	3.25408	2.28635e-07	2.12421	0.00019229	0.685094	0.543069
1454	chr1	76905900	76907899	FALSE	Stable	3.10713	7.27712e-07	2.69963	2.39722e-06	0.331396	0.797753
1455	chr1	76908000	76908599	FALSE	Stable	3.10453	7.43072e-07	2.63639	4.0474e-06	0.430103	0.736479
1456	chr1	76957050	76957299	FALSE	Stable	2.20514	0.000364242	3.92459	1.62161e-11	-0.727789	0.503327
1457	chr1	76957850	76958099	FALSE	other	3.12737	6.2298e-07	1.08159	0.0576426	0.431816	0.735559
1458	chr1	76972300	76972599	FALSE	Stable	4.27112	2.56897e-11	1.73843	0.00224433	-0.0729419	0.960782
1459	chr1	76972800	76973199	FALSE	Stable	3.47353	3.79326e-08	2.02593	0.000373538	0.41027	0.749006
1460	chr1	76973250	76973449	FALSE	Stable	1.56652	0.0109353	2.39194	2.76661e-05	0.138583	0.920948
1461	chr1	76973600	76973799	FALSE	other	2.58674	3.17698e-05	0.665899	0.245187	0.747436	0.484294
1462	chr1	76974000	76974199	FALSE	Stable	2.38216	0.000121787	3.29279	1.14436e-08	0.385493	0.764305
1463	chr1	76974350	76974549	FALSE	Stable	4.15985	7.61696e-11	1.92453	0.000721364	0.633802	0.587035
1464	chr1	76975050	76975499	FALSE	Stable	2.95575	2.29717e-06	1.82099	0.00137335	0.516609	0.679007
1465	chr1	76975700	76976149	FALSE	Stable	2.79008	7.72681e-06	1.7662	0.00190707	0.182746	0.894423
1466	chr1	77140500	77141149	FALSE	Stable	2.58543	3.20397e-05	3.42596	3.07908e-09	0.315188	0.80788
1467	chr1	77141750	77141949	FALSE	Stable	2.83971	5.40805e-06	1.58165	0.00542271	0.639907	0.58204
1468	chr1	77175300	77175449	FALSE	other	0.41752	0.498926	2.25073	7.87788e-05	-0.858169	0.381715
1469	chr1	77207150	77207349	FALSE	other	0.175957	0.776723	3.43295	2.87133e-09	-0.685953	0.542089
1470	chr1	77220050	77220249	FALSE	SHHnullonly	0.0421778	0.945662	1.84326	0.00119929	-1.57182	0.0283263
1471	chr1	77220900	77221099	FALSE	Stable	1.28281	0.0370391	4.80293	4.38067e-16	-0.365054	0.777958
1472	chr1	77254350	77254699	FALSE	HH_dep	2.5793	3.34476e-05	0.649396	0.25708	1.67234	0.0163481
1473	chr1	77254850	77254949	FALSE	other	2.25449	0.000270513	0.967142	0.0899606	1.25966	0.111251
1474	chr1	77255100	77255249	FALSE	Stable	1.98291	0.00131862	2.78139	1.20259e-06	0.982115	0.279076
1475	chr1	77255500	77256099	FALSE	Stable	3.55363	1.92946e-08	2.01403	0.000403943	1.01611	0.252777
1476	chr1	77256300	77258999	FALSE	Stable	4.35891	1.06696e-11	3.34639	6.79409e-09	0.73116	0.500162
1477	chr1	77259450	77259599	FALSE	Stable	2.62891	2.38721e-05	1.33309	0.0191679	1.27504	0.105571
1478	chr1	77274700	77274899	FALSE	Stable	4.37265	9.24939e-12	1.64822	0.00375755	1.1229	0.181693
1479	chr1	77289950	77290099	FALSE	Stable	3.93962	6.16182e-10	1.16757	0.0403457	0.753434	0.478662
1480	chr1	77341500	77341649	FALSE	other	0.945334	0.124269	2.16438	0.000145438	-0.666621	0.558739
1481	chr1	77342050	77342199	FALSE	other	2.76766	9.08089e-06	0.650428	0.256348	0.503267	0.688251
1482	chr1	77388100	77389299	FALSE	Stable	3.39111	7.51222e-08	3.3767	5.02931e-09	0.0531642	0.972579
1483	chr1	77389500	77389599	FALSE	Stable	3.01272	1.49462e-06	2.15626	0.000153789	0.246599	0.851966
1484	chr1	77403900	77404049	FALSE	Stable	2.09986	0.000678507	2.25269	7.7704e-05	0.233123	0.861427
1485	chr1	77404300	77404449	FALSE	Stable	2.36919	0.000132486	1.53215	0.00706555	1.12699	0.179166
1486	chr1	77494500	77495849	FALSE	Stable	2.23085	0.00031243	3.21295	2.46003e-08	-0.36278	0.779335
1487	chr1	77496000	77496649	FALSE	Stable	2.05436	0.000884027	2.90553	4.10052e-07	-0.348807	0.78766
1488	chr1	77496850	77496949	FALSE	Stable	1.61103	0.00887317	2.84761	6.80363e-07	-0.675182	0.551216
1489	chr1	77512550	77513699	FALSE	Stable	3.00813	1.54934e-06	2.60178	5.34593e-06	0.144575	0.917121
1490	chr1	77513850	77515099	FALSE	Stable	3.18664	3.90171e-07	3.81311	5.49975e-11	-0.109443	0.937823
1491	chr1	77515300	77516349	TRUE	Stable	3.97106	4.60151e-10	3.0623	1.00083e-07	0.329761	0.798865
1492	chr1	77728100	77728299	FALSE	Stable	2.59354	3.03571e-05	1.48698	0.00896263	0.0796044	0.956568
1493	chr1	77728350	77728549	FALSE	Stable	3.84637	1.45921e-09	2.19231	0.000119555	0.0525454	0.973042
1494	chr1	78021600	78022399	FALSE	Stable	3.07848	9.06297e-07	1.80916	0.00147448	0.401157	0.754504
1495	chr1	78068950	78069099	FALSE	other	0.39073	0.527285	1.79847	0.00157235	-0.111615	0.936478
1496	chr1	78081100	78081249	FALSE	Stable	2.41714	9.75457e-05	3.06551	9.71657e-08	0.343292	0.790384
1497	chr1	78082150	78082299	FALSE	Stable	1.58683	0.00994386	3.14543	4.65204e-08	0.428881	0.73731
1498	chr1	78082550	78082799	FALSE	Stable	1.71874	0.00527363	3.33409	7.67753e-09	-0.640317	0.581456
1499	chr1	78083150	78083299	FALSE	Stable	1.85367	0.00264757	1.36285	0.0166291	0.459681	0.719039
1500	chr1	78188750	78189199	TRUE	Stable	1.82501	0.00307339	3.66141	2.8065e-10	-0.277795	0.830836
1501	chr1	78190050	78190299	FALSE	Stable	2.45441	7.64839e-05	3.00224	1.73216e-07	0.0135707	0.992458
1502	chr1	78201600	78201749	FALSE	other	1.04592	0.0890013	3.03812	1.24847e-07	-0.696066	0.53215
1503	chr1	78442050	78442249	FALSE	other	0.422904	0.493461	2.02379	0.000378682	-0.175264	0.89915
1504	chr1	78442600	78443299	FALSE	Stable	2.78129	8.24232e-06	3.04349	1.18887e-07	-0.108235	0.938726
1505	chr1	78443550	78443749	FALSE	Stable	2.53634	4.45393e-05	3.20812	2.57649e-08	-0.69946	0.528693
1506	chr1	78444150	78444299	FALSE	Stable	2.69132	1.54933e-05	2.63401	4.1241e-06	0.0365388	0.981607
1507	chr1	78462100	78462349	FALSE	other	0.818933	0.183239	3.53882	9.87484e-10	0.265492	0.838459
1508	chr1	78488600	78489549	TRUE	Stable	3.97279	4.52967e-10	3.77956	7.92351e-11	0.28488	0.82673
1509	chr1	78538900	78538999	FALSE	Stable	2.6814	1.66035e-05	2.0607	0.000296586	0.620697	0.598338
1510	chr1	78649250	78649349	FALSE	other	0.92186	0.134014	1.55506	0.00625812	0.9254	0.325098
1511	chr1	78656300	78658699	FALSE	Stable	4.49128	2.72718e-12	3.64209	3.43852e-10	0.463538	0.715964
1512	chr1	78658750	78658999	FALSE	Stable	2.80458	6.95167e-06	1.59018	0.00517572	0.956835	0.298625
1513	chr1	78820500	78820599	FALSE	HH_dep	3.18245	4.02405e-07	0.0590955	0.919088	1.52184	0.0357995
1514	chr1	78854550	78854649	FALSE	other	2.61322	2.65238e-05	0.476812	0.407328	0.11779	0.932687
1515	chr1	78940200	78940349	FALSE	other	2.44862	7.93452e-05	0.87672	0.124653	0.544942	0.659709
1516	chr1	78940600	78940699	FALSE	other	1.81333	0.00326252	0.945422	0.0974577	1.4293	0.0551124
1517	chr1	79183600	79183799	TRUE	Stable	2.86343	4.55378e-06	3.13543	5.08464e-08	-0.292773	0.82266
1518	chr1	79184250	79184799	TRUE	Stable	2.72466	1.22889e-05	3.74224	1.18662e-10	0.366272	0.777354
1519	chr1	79185000	79185099	FALSE	other	0.775706	0.20744	2.42684	2.12098e-05	-0.6761	0.550354
1520	chr1	79314150	79314299	FALSE	Stable	2.48362	6.32976e-05	3.59411	5.63415e-10	-0.118829	0.932117
1521	chr1	79314400	79314749	FALSE	Stable	2.92191	2.95826e-06	2.4274	2.11407e-05	-0.0255361	0.986688
1522	chr1	79315000	79315349	FALSE	Stable	3.17495	4.27711e-07	1.43618	0.011596	0.534281	0.667204
1523	chr1	79332950	79333199	FALSE	Stable	3.59492	1.35206e-08	1.9006	0.00083811	0.681881	0.54534
1524	chr1	79544350	79544499	FALSE	other	0.950161	0.122384	2.16117	0.000148582	0.0851179	0.953727
1525	chr1	79599200	79599349	FALSE	HH_dep	1.66816	0.00675769	0.945422	0.0974577	1.69778	0.0141552
1526	chr1	79709550	79709649	FALSE	other	2.54207	4.29617e-05	1.08749	0.0562743	-0.564036	0.645438
1527	chr1	79761900	79762049	FALSE	Stable	3.35134	1.04124e-07	1.6477	0.003768	0.67668	0.549973
1528	chr1	79776050	79776599	FALSE	Stable	3.34626	1.0863e-07	2.93888	3.05879e-07	0.370488	0.774439
1529	chr1	79832250	79832749	FALSE	Stable	2.54434	4.23943e-05	2.82414	8.3099e-07	-0.508465	0.684416
1530	chr1	79833200	79833599	FALSE	Stable	3.29407	1.65569e-07	2.81937	8.66922e-07	-0.366434	0.777354
1531	chr1	79858100	79859449	FALSE	Stable	4.45868	3.83747e-12	3.01125	1.59565e-07	0.344399	0.789791
1532	chr1	79861500	79861799	FALSE	Stable	2.54849	4.13851e-05	2.15231	0.000158136	0.138604	0.920943
1533	chr1	79862000	79862099	FALSE	Stable	2.6814	1.66035e-05	1.39041	0.014549	-0.310534	0.811088
1534	chr1	79862400	79862549	FALSE	other	2.52674	4.75556e-05	-0.226073	0.697552	0.400235	0.755241
1535	chr1	79874000	79874149	FALSE	other	0.134527	0.828407	1.13732	0.0458162	-0.033272	0.983504
1536	chr1	79978400	79979449	FALSE	Stable	2.7565	9.82332e-06	3.44315	2.61477e-09	-0.345878	0.788984
1537	chr1	79982250	79982849	FALSE	Stable	2.8443	5.23053e-06	2.99975	1.76935e-07	-0.193758	0.887224
1538	chr1	80012950	80013399	FALSE	other	0.596555	0.333007	4.46617	2.96633e-14	-1.07658	0.210799
1539	chr1	80013600	80013899	FALSE	Stable	1.66468	0.00687506	3.31744	8.97508e-09	-0.0941639	0.947542
1540	chr1	80014100	80015149	FALSE	Stable	2.67883	1.69014e-05	3.78574	7.40817e-11	-0.322662	0.80331
1541	chr1	80015200	80015399	FALSE	Stable	3.38491	7.88414e-08	2.15547	0.000154668	-0.607511	0.609301
1542	chr1	80060850	80061949	FALSE	Stable	3.13097	6.06513e-07	2.85583	6.35062e-07	0.00139196	0.999121
1543	chr1	80062100	80062949	FALSE	Stable	2.7557	9.8797e-06	3.49657	1.52906e-09	0.146986	0.915338
1544	chr1	80063850	80063949	FALSE	other	0.706984	0.250761	2.10573	0.000218294	-0.837346	0.402066
1545	chr1	80110900	80110999	FALSE	Stable	2.66188	1.90481e-05	1.56497	0.00593432	0.652131	0.570954
1546	chr1	80339600	80340749	FALSE	Stable	4.12973	1.01608e-10	4.04144	4.38918e-12	0.313688	0.808678
1547	chr1	80341100	80341499	FALSE	Stable	3.33647	1.17281e-07	2.7589	1.45714e-06	0.0575199	0.969927
1548	chr1	80630200	80630649	FALSE	Stable	3.56003	1.8254e-08	1.67933	0.00315768	0.848899	0.391198
1549	chr1	80656600	80656749	FALSE	Stable	1.88191	0.00228212	1.55317	0.00632313	0.295535	0.821216
1550	chr1	80656950	80657149	FALSE	Stable	3.18847	3.84233e-07	2.46856	1.53808e-05	0.699134	0.529101
1551	chr1	80657550	80657649	FALSE	other	1.44699	0.0186755	1.0565	0.0637517	-0.864285	0.377245
1552	chr1	80659850	80660049	FALSE	Stable	3.69868	5.48077e-09	2.03587	0.000349689	0.0612893	0.967301
1553	chr1	80675450	80675599	FALSE	other	0.755852	0.219289	3.13996	4.88337e-08	-0.810273	0.42657
1554	chr1	80757250	80757549	FALSE	Stable	3.12937	6.13649e-07	2.70995	2.20024e-06	-0.190439	0.889509
1555	chr1	80758200	80758849	FALSE	Stable	2.36595	0.00013506	2.38121	3.00364e-05	-0.153454	0.911666
1556	chr1	80763900	80763999	FALSE	HH_dep	2.51999	4.96612e-05	-0.730123	0.201778	1.64859	0.0187561
1557	chr1	80777100	80777599	FALSE	Stable	3.49821	3.08225e-08	2.83332	7.69935e-07	-0.749866	0.482081
1558	chr1	80777650	80778299	FALSE	Stable	2.57519	3.44008e-05	3.07192	9.18673e-08	-0.0491399	0.974492
1559	chr1	80778450	80778899	FALSE	Stable	3.18822	3.85014e-07	3.1204	5.85137e-08	-0.160839	0.907864
1560	chr1	80783250	80783399	FALSE	common_SHHnullhigh	1.36694	0.0262597	2.23722	8.68441e-05	-1.48014	0.0437643
1561	chr1	80783500	80783649	FALSE	other	0.66599	0.279416	3.6085	4.84543e-10	-0.955037	0.300295
1562	chr1	80932250	80932549	FALSE	Stable	2.4208	9.51711e-05	2.52638	9.74053e-06	-0.126361	0.927755
1563	chr1	81521050	81521199	FALSE	other	0.377019	0.541909	2.05307	0.000311973	0.466578	0.713604
1564	chr1	81578000	81578099	FALSE	other	1.10389	0.0726718	3.01601	1.52537e-07	0.396448	0.758248
1565	chr1	81578150	81578299	FALSE	Stable	3.78903	2.43863e-09	1.37278	0.0158582	0.397636	0.757274
1566	chr1	81588250	81588699	FALSE	Stable	2.75603	9.85661e-06	1.5815	0.00542706	1.13763	0.172567
1567	chr1	81608150	81608699	TRUE	Stable	2.82913	5.81941e-06	2.48885	1.31388e-05	0.497043	0.692543
1568	chr1	81609200	81609799	TRUE	Stable	3.87108	1.16158e-09	1.68166	0.00311618	0.774665	0.459135
1569	chr1	81718600	81719099	FALSE	HH_dep	4.08496	1.5549e-10	0.271262	0.640213	1.78366	0.00861304
1570	chr1	81737900	81737999	FALSE	other	1.78294	0.00382153	0.928106	0.103784	0.83406	0.404613
1571	chr1	81738800	81738949	FALSE	Stable	2.20769	0.000358781	2.77394	1.28479e-06	0.425411	0.739643
1572	chr1	81742900	81743049	FALSE	Stable	1.75632	0.00436806	3.31819	8.9092e-09	0.425599	0.739404
1573	chr1	81743750	81744499	FALSE	Stable	3.50888	2.81235e-08	2.45115	1.76057e-05	0.471336	0.710673
1574	chr1	81744750	81746299	FALSE	Stable	3.89378	9.41001e-10	3.50618	1.38231e-09	0.511191	0.682709
1575	chr1	81808250	81808499	FALSE	other	0.0807456	0.896734	2.84849	6.76111e-07	-1.20914	0.134264
1576	chr1	81912750	81913149	FALSE	Stable	2.72762	1.20272e-05	2.68102	2.80009e-06	0.234	0.860882
1577	chr1	81913250	81913349	FALSE	Stable	1.58683	0.00994386	2.42493	2.1506e-05	0.136944	0.921827
1578	chr1	81913500	81914799	FALSE	Stable	3.70091	5.37464e-09	2.47699	1.44105e-05	0.310481	0.811088
1579	chr1	81915950	81916049	FALSE	Stable	1.28582	0.0366117	1.81257	0.00144429	0.0346489	0.982932
1580	chr1	81916300	81916749	FALSE	Stable	2.23015	0.000313657	2.66662	3.15349e-06	0.179149	0.8968
1581	chr1	81917300	81917449	FALSE	Stable	2.18675	0.000406829	1.92348	0.000725525	0.553223	0.652981
1582	chr1	81917550	81917849	FALSE	Stable	2.16749	0.000456602	2.52692	9.70645e-06	0.0918225	0.949142
1583	chr1	81924800	81924949	FALSE	other	0.771454	0.20996	3.04342	1.18887e-07	-0.698131	0.53001
1584	chr1	81925100	81925199	FALSE	other	2.52401	4.83492e-05	0.917877	0.10765	-0.412479	0.747768
1585	chr1	82041600	82041699	FALSE	other	3.14733	5.30701e-07	0.106699	0.854858	1.02201	0.248472
1586	chr1	82124750	82124849	FALSE	SHHnullonly	-0.687935	0.263918	3.0581	1.03852e-07	-1.75856	0.0100639
1587	chr1	82125100	82125249	FALSE	other	0.549108	0.373175	3.53882	9.87484e-10	-1.41588	0.0586407
1588	chr1	82135300	82135599	FALSE	Stable	2.67001	1.80211e-05	2.9552	2.63571e-07	0.100766	0.943155
1589	chr1	82135650	82135799	FALSE	Stable	2.97356	2.0111e-06	1.41601	0.0128292	0.207436	0.878318
1590	chr1	82136200	82136949	FALSE	Stable	3.77551	2.75588e-09	2.5894	5.92877e-06	0.147854	0.91497
1591	chr1	82203200	82203849	FALSE	HH_dep	3.76333	3.08028e-09	0.970054	0.0890255	1.65628	0.0179952
1592	chr1	82258000	82258999	FALSE	HH_sens	3.52489	2.45591e-08	2.56073	7.44024e-06	1.75652	0.0101668
1593	chr1	82259300	82259799	FALSE	HH_sens	3.33561	1.18106e-07	1.36232	0.0166694	2.13006	0.000838684
1594	chr1	82260150	82260449	FALSE	HH_dep	2.75523	9.91134e-06	0.380782	0.509468	2.07738	0.00123746
1595	chr1	82260800	82261249	TRUE	Stable	3.7797	2.65119e-09	1.46445	0.0100562	1.27957	0.103788
1596	chr1	82261500	82261849	TRUE	HH_sens	2.73583	1.13611e-05	2.08096	0.000258441	1.62438	0.0214149
1597	chr1	82262100	82262299	FALSE	HH_dep	2.80379	6.99226e-06	-0.574838	0.316587	3.12106	7.31816e-08
1598	chr1	82272950	82273049	FALSE	other	1.78136	0.00385044	0.153651	0.792499	0.859771	0.380388
1599	chr1	82273200	82273549	FALSE	Stable	3.72542	4.3206e-09	2.58147	6.31579e-06	1.11626	0.185935
1600	chr1	82282700	82284299	TRUE	Stable	4.14697	8.56522e-11	3.22297	2.23122e-08	0.468943	0.712517
1601	chr1	82286000	82286149	FALSE	other	2.44862	7.93452e-05	0.357647	0.536235	0.740855	0.491142
1602	chr1	82289900	82290099	FALSE	Stable	3.99525	3.66101e-10	1.71667	0.00254353	0.677055	0.549598
1603	chr1	82290500	82292099	TRUE	Stable	3.58709	1.45085e-08	2.97594	2.1902e-07	0.571461	0.639374
1604	chr1	82304900	82305199	FALSE	other	3.19881	3.53856e-07	-0.189538	0.744777	0.772333	0.46099
1605	chr1	82305400	82305499	FALSE	other	1.54679	0.0119736	1.03691	0.0688872	0.895834	0.349398
1606	chr1	82305950	82306099	FALSE	HH_sens	3.88611	1.01013e-09	1.40724	0.0133988	2.47888	4.98121e-05
1607	chr1	82316150	82317149	FALSE	Stable	3.93546	6.41307e-10	3.10599	6.67725e-08	0.467873	0.713303
1608	chr1	82344050	82344149	FALSE	other	2.25474	0.00027026	-0.0811175	0.889844	1.32342	0.0876382
1609	chr1	82345050	82345149	FALSE	Stable	3.38716	7.73826e-08	1.34177	0.0184044	1.03296	0.240936
1610	chr1	82361350	82361449	FALSE	Stable	2.27587	0.000237292	1.37404	0.0157607	0.291973	0.823081
1611	chr1	82361550	82361749	FALSE	other	3.08317	8.73377e-07	0.846237	0.138345	0.886821	0.357643
1612	chr1	82373400	82373499	FALSE	other	1.17207	0.0567	2.49543	1.2469e-05	-0.331691	0.797531
1613	chr1	82374500	82374599	FALSE	other	0.870918	0.156856	2.188	0.000123195	-0.342047	0.791006
1614	chr1	82385800	82386049	FALSE	Stable	1.77152	0.00404861	3.58387	6.22903e-10	-0.820688	0.417916
1615	chr1	82472050	82472199	FALSE	Stable	1.98292	0.00131862	1.67162	0.0032976	-0.29856	0.819711
1616	chr1	82472400	82472749	FALSE	Stable	3.4375	5.12486e-08	2.15934	0.000150514	0.660006	0.564173
1617	chr1	82473150	82473649	FALSE	Stable	2.91789	3.04992e-06	1.99837	0.000448347	0.0361256	0.981926
1618	chr1	82545100	82545249	FALSE	Stable	1.54857	0.0118789	2.93649	3.12048e-07	0.599549	0.61557
1619	chr1	82724700	82725399	FALSE	Stable	4.64069	5.84563e-13	3.02556	1.39773e-07	0.478144	0.706362
1620	chr1	82839350	82839949	TRUE	Stable	3.69112	5.84346e-09	3.15921	4.07297e-08	0.761174	0.47105
1621	chr1	82975550	82975699	FALSE	HH_dep	2.2773	0.000235444	-0.994968	0.0810562	2.66241	9.7679e-06
1622	chr1	83034350	83034449	FALSE	other	2.26706	0.00025037	0.185425	0.750274	0.731525	0.49984
1623	chr1	83159700	83160199	FALSE	Stable	3.99232	3.76288e-10	1.38744	0.0147608	0.569126	0.641005
1624	chr1	83169200	83169799	FALSE	Stable	2.71224	1.34111e-05	2.76496	1.38528e-06	0.134678	0.923413
1625	chr1	83992150	83992399	FALSE	SHHnullonly	-1.17571	0.0559535	3.55077	8.79026e-10	-1.93345	0.00326914
1626	chr1	84147900	84148149	FALSE	Stable	2.5472	4.16941e-05	2.07773	0.000264089	0.441789	0.729388
1627	chr1	84185700	84185999	FALSE	Stable	2.80147	7.11419e-06	2.13244	0.000181925	0.0508722	0.973728
1628	chr1	84186150	84187299	TRUE	Stable	3.43259	5.34082e-08	3.33453	7.64481e-09	0.0591603	0.968791
1629	chr1	84187700	84187949	FALSE	Stable	2.40649	0.000104099	1.64693	0.00378472	-0.413841	0.747193
1630	chr1	84217700	84217899	FALSE	Stable	2.0473	0.000918156	3.40821	3.68368e-09	-0.369249	0.775246
1631	chr1	84475100	84475199	FALSE	other	-0.356864	0.563938	2.73506	1.77826e-06	-0.783358	0.451207
1632	chr1	84535800	84536049	FALSE	other	0.740048	0.229228	3.95736	1.11927e-11	-0.424277	0.740122
1633	chr1	84536550	84536899	FALSE	Stable	2.27613	0.000237208	3.16287	3.9364e-08	-0.560279	0.647643
1634	chr1	84549100	84549349	TRUE	Stable	4.10427	1.29259e-10	2.80942	9.43546e-07	0.267903	0.83739
1635	chr1	84550200	84551099	TRUE	Stable	2.95938	2.23699e-06	3.58433	6.21425e-10	-0.55644	0.650691
1636	chr1	84838100	84840799	TRUE	Stable	3.72132	4.48454e-09	3.82032	5.10084e-11	0.171373	0.90133
1637	chr1	85703300	85703549	FALSE	other	4.03793	2.44821e-10	0.386304	0.503168	1.04599	0.230867
1638	chr1	85793350	85794449	FALSE	Stable	4.01502	3.03999e-10	3.02661	1.38474e-07	0.480097	0.704909
1639	chr1	85894450	85896299	TRUE	Stable	4.50146	2.45582e-12	3.97097	9.60605e-12	0.121259	0.930749
1640	chr1	85897400	85897499	FALSE	other	0.371126	0.548149	2.96656	2.3846e-07	-0.60796	0.608876
1641	chr1	85933350	85933499	FALSE	other	1.36865	0.0260949	-0.0780724	0.893588	1.00195	0.262676
1642	chr1	86015850	86016049	FALSE	Stable	2.87755	4.11231e-06	2.27026	6.85123e-05	0.162506	0.906909
1643	chr1	86060600	86060799	FALSE	Stable	2.40594	0.000104429	1.33251	0.0192194	0.305487	0.81406
1644	chr1	86060900	86061049	FALSE	Stable	3.90519	8.48878e-10	1.53844	0.00684305	0.765235	0.46772
1645	chr1	86061700	86061849	FALSE	Stable	2.45541	7.60398e-05	2.6722	3.01254e-06	1.35704	0.0759314
1646	chr1	86064150	86065199	TRUE	Stable	4.34353	1.24494e-11	3.91693	1.76508e-11	0.461239	0.717873
1647	chr1	86065600	86065749	FALSE	other	-0.759195	0.217353	3.2031	2.69857e-08	-0.655412	0.56848
1648	chr1	86154350	86154599	FALSE	Stable	2.58692	3.17306e-05	1.53019	0.00714306	0.477737	0.706599
1649	chr1	86358350	86359449	FALSE	Stable	4.63395	6.2682e-13	3.93365	1.46612e-11	0.660777	0.563446
1650	chr1	86359700	86360599	FALSE	Stable	3.68577	6.1377e-09	3.21498	2.4112e-08	0.568793	0.64144
1651	chr1	86397550	86398099	FALSE	Stable	3.5258	2.4362e-08	2.82996	7.9279e-07	0.243226	0.854159
1652	chr1	86398150	86398249	FALSE	Stable	2.05193	0.000896574	3.21001	2.53431e-08	0.400528	0.754941
1653	chr1	86398550	86399049	FALSE	Stable	3.55512	1.90469e-08	1.93702	0.000665263	0.4447	0.727948
1654	chr1	86431300	86431449	FALSE	other	0.135467	0.827227	2.23731	8.68139e-05	-1.1268	0.179171
1655	chr1	86433450	86434399	FALSE	Stable	4.87889	4.65773e-14	5.01848	2.59073e-17	0.112687	0.935735
1656	chr1	86434550	86435749	FALSE	Stable	3.7855	2.51529e-09	3.72743	1.38587e-10	-0.0343895	0.982932
1657	chr1	86440150	86440249	FALSE	Stable	2.70702	1.39129e-05	3.52605	1.12416e-09	0.172631	0.900561
1658	chr1	86440700	86443649	TRUE	Stable	5.38333	1.71491e-16	5.3428	2.86121e-19	0.282475	0.827406
1659	chr1	86464100	86465349	FALSE	Stable	3.67721	6.61691e-09	4.4285	4.65313e-14	0.412044	0.747768
1660	chr1	86471950	86472249	FALSE	Stable	1.69401	0.0059543	2.28428	6.16508e-05	-0.210519	0.876607
1661	chr1	86472350	86472699	FALSE	Stable	3.46986	3.91527e-08	2.36738	3.3315e-05	0.38935	0.762502
1662	chr1	86472750	86472949	FALSE	Stable	2.09863	0.000683623	2.33447	4.26108e-05	0.215413	0.873835
1663	chr1	86486750	86488749	FALSE	Stable	4.23991	3.51178e-11	4.05311	3.85405e-12	0.224442	0.867726
1664	chr1	86502250	86505399	TRUE	Stable	4.36092	1.04528e-11	3.71599	1.56362e-10	0.43421	0.734122
1665	chr1	86509150	86510099	FALSE	Stable	3.35429	1.01692e-07	2.46892	1.53528e-05	0.714502	0.514881
1666	chr1	86522650	86522749	FALSE	other	1.05529	0.0863123	2.73884	1.72344e-06	0.303932	0.815437
1667	chr1	86524400	86526299	TRUE	Stable	5.41086	1.29299e-16	5.1033	8.55237e-18	0.267098	0.837886
1668	chr1	86526550	86528699	TRUE	Stable	4.73711	2.02471e-13	3.74087	1.20479e-10	0.486154	0.699758
1669	chr1	86582400	86582499	FALSE	Stable	2.25449	0.000270513	3.54173	9.60337e-10	0.286595	0.825445
1670	chr1	86586800	86586899	FALSE	other	1.13478	0.0650931	1.98357	0.000494078	0.120728	0.931122
1671	chr1	86633150	86633399	FALSE	other	0.667332	0.278484	2.86955	5.61964e-07	-0.229282	0.864606
1672	chr1	86703700	86704299	TRUE	Stable	3.26778	2.05025e-07	2.45291	1.73592e-05	0.569858	0.640493
1673	chr1	86993850	86993949	FALSE	other	1.77152	0.00404861	1.04584	0.0664868	0.11582	0.933751
1674	chr1	87035100	87035249	FALSE	other	0.342211	0.580095	2.70741	2.24649e-06	-1.39016	0.0656048
1675	chr1	87035400	87035749	FALSE	Stable	2.00059	0.0011947	2.86153	6.03494e-07	-0.159683	0.908603
1676	chr1	87035900	87036749	FALSE	Stable	2.91828	3.04203e-06	3.33684	7.47662e-09	-0.297259	0.820556
1677	chr1	87169200	87169299	FALSE	SHHnullonly	-0.991662	0.106926	2.46569	1.57239e-05	-2.46569	5.5633e-05
1678	chr1	87213450	87214749	TRUE	Stable	3.32231	1.31606e-07	3.0463	1.15924e-07	0.481071	0.704192
1679	chr1	87327000	87327749	FALSE	Stable	3.44577	4.79326e-08	3.17234	3.59396e-08	0.534439	0.667079
1680	chr1	87640000	87640299	FALSE	Stable	3.21511	3.12171e-07	1.13866	0.0455806	0.628588	0.591579
1681	chr1	87755250	87755399	FALSE	Stable	1.54044	0.0123069	1.34177	0.0184044	0.760068	0.472168
1682	chr1	87755450	87755849	FALSE	Stable	3.76742	2.97466e-09	1.66394	0.00344242	0.333082	0.796681
1683	chr1	87756050	87756799	FALSE	Stable	3.21806	3.04544e-07	2.94298	2.946e-07	0.598846	0.616119
1684	chr1	87853300	87853649	FALSE	Stable	2.88684	3.83455e-06	3.97363	9.34031e-12	-0.111751	0.936436
1685	chr1	88007900	88008599	TRUE	Stable	3.49249	3.23534e-08	2.86588	5.80705e-07	0.587876	0.625794
1686	chr1	88008650	88008849	TRUE	Stable	2.98961	1.78294e-06	1.6737	0.00326057	0.961612	0.294435
1687	chr1	88277000	88277649	FALSE	Stable	3.93613	6.37201e-10	3.10804	6.56306e-08	0.372858	0.773041
1688	chr1	88358050	88358149	FALSE	other	0.968233	0.11559	1.91508	0.000765419	0.626987	0.592829
1689	chr1	88446550	88446699	FALSE	Stable	1.83327	0.0029449	2.41109	2.38754e-05	-0.605512	0.610413
1690	chr1	88447100	88447499	FALSE	Stable	2.99034	1.77322e-06	2.76668	1.36771e-06	-0.221125	0.870231
1691	chr1	88471100	88471399	FALSE	Stable	3.02021	1.41423e-06	2.64508	3.76259e-06	-0.466009	0.713993
1692	chr1	88473800	88473949	FALSE	Stable	3.73127	4.09824e-09	1.87164	0.00100436	-0.158992	0.908914
1693	chr1	88474150	88476299	FALSE	Stable	3.57902	1.54999e-08	3.0845	8.15546e-08	-0.167199	0.904569
1694	chr1	88476500	88476649	FALSE	Stable	2.12598	0.000583618	2.84844	6.7622e-07	-0.750144	0.481705
1695	chr1	88478500	88478649	FALSE	other	3.19935	3.52526e-07	-0.49888	0.385892	0.506269	0.68623
1696	chr1	88699700	88699899	FALSE	other	3.65271	8.20782e-09	0.857563	0.133089	0.189514	0.889929
1697	chr1	88701450	88701549	FALSE	other	1.11094	0.0708876	2.09986	0.000227067	-0.214498	0.874172
1698	chr1	88701600	88702399	FALSE	Stable	3.33937	1.14499e-07	3.08285	8.28735e-08	0.218216	0.872166
1699	chr1	88757400	88757499	FALSE	other	2.10255	0.000667673	0.731721	0.200777	0.343879	0.79012
1700	chr1	88819950	88820099	FALSE	other	0.335362	0.58766	2.34816	3.84534e-05	-0.454196	0.722145
1701	chr1	88995650	88995749	FALSE	other	1.54044	0.0123069	0.578734	0.313286	0.193761	0.887224
1702	chr1	89033000	89033849	FALSE	Stable	2.57039	3.54955e-05	2.91916	3.63448e-07	-0.466043	0.713967
1703	chr1	89033900	89034649	FALSE	Stable	3.05658	1.07444e-06	3.52767	1.10747e-09	-0.314325	0.808375
1704	chr1	89038600	89038699	FALSE	other	1.60744	0.00902206	0.87672	0.124653	0.699581	0.528566
1705	chr1	89039300	89040699	FALSE	Stable	3.71154	4.89453e-09	3.39365	4.25676e-09	0.52675	0.67318
1706	chr1	89040950	89041299	FALSE	Stable	3.28256	1.82181e-07	1.56098	0.00606753	0.466804	0.713604
1707	chr1	89043200	89043299	FALSE	other	1.95083	0.00157004	0.301819	0.602602	0.0350392	0.98268
1708	chr1	89069650	89069999	TRUE	Stable	2.93553	2.66654e-06	2.39865	2.62514e-05	0.499529	0.690404
1709	chr1	89070400	89071399	TRUE	Stable	3.74953	3.48107e-09	3.09377	7.50168e-08	0.616445	0.60177
1710	chr1	89071800	89071949	FALSE	Stable	1.93721	0.00169305	1.90832	0.000799715	0.480149	0.704902
1711	chr1	89072250	89072549	FALSE	Stable	2.77807	8.43384e-06	2.21166	0.000104313	0.723178	0.507412
1712	chr1	89091900	89092099	FALSE	Stable	2.94159	2.54639e-06	1.84502	0.00118616	-0.158199	0.909161
1713	chr1	89092150	89093249	FALSE	Stable	2.78659	7.93574e-06	2.77353	1.28934e-06	0.0347341	0.982928
1714	chr1	89093550	89093649	FALSE	Stable	2.705	1.40871e-05	2.05513	0.000307864	-0.377084	0.770659
1715	chr1	89101450	89101799	FALSE	Stable	3.03067	1.30598e-06	2.03661	0.000348114	0.639755	0.582093
1716	chr1	89102400	89102549	FALSE	other	2.20847	0.000357486	-0.356583	0.537461	0.364759	0.778156
1717	chr1	89107600	89110299	FALSE	Stable	3.80361	2.14131e-09	3.17638	3.47237e-08	0.330434	0.798449
1718	chr1	89140100	89140249	FALSE	Stable	2.59354	3.03571e-05	1.33497	0.0190069	0.648709	0.573922
1719	chr1	89164000	89164149	FALSE	Stable	3.30208	1.55049e-07	1.45205	0.0106971	-0.491743	0.696028
1720	chr1	89183150	89183299	FALSE	Stable	4.23173	3.81712e-11	3.65788	2.91443e-10	0.573857	0.637341
1721	chr1	89190550	89190649	FALSE	Stable	2.74994	1.02693e-05	2.07604	0.000267018	-0.338538	0.792859
1722	chr1	89191400	89191549	FALSE	Stable	1.66056	0.0070068	1.87526	0.000982071	0.171249	0.901417
1723	chr1	89415450	89415699	FALSE	other	0.585442	0.342236	3.39819	4.07295e-09	-0.970036	0.28805
1724	chr1	89453900	89454799	TRUE	Stable	3.44291	4.91058e-08	3.61525	4.51548e-10	-0.00437213	0.997611
1725	chr1	89454850	89455249	TRUE	Stable	2.54829	4.1435e-05	3.95981	1.08903e-11	0.561419	0.646839
1726	chr1	89518100	89518199	FALSE	Stable	1.72825	0.00502695	1.45325	0.0106325	0.836395	0.40262
1727	chr1	89569000	89569199	FALSE	Stable	1.48771	0.0156351	2.76788	1.35384e-06	-0.0886513	0.951023
1728	chr1	89577050	89577249	FALSE	Stable	1.80211	0.00346041	2.70421	2.30699e-06	-0.34968	0.787128
1729	chr1	89647000	89647499	FALSE	Stable	3.32546	1.28129e-07	1.54594	0.00657024	0.742872	0.489196
1730	chr1	89647850	89648199	FALSE	Stable	3.64231	8.97578e-09	1.14581	0.0442213	0.878374	0.364669
1731	chr1	89669600	89669699	FALSE	Stable	1.83209	0.00296172	2.04567	0.000327862	0.347819	0.788321
1732	chr1	89670600	89671349	FALSE	Stable	4.38841	7.90894e-12	3.03383	1.29811e-07	0.202305	0.881493
1733	chr1	89671750	89672799	FALSE	Stable	3.29146	1.69245e-07	3.22366	2.21648e-08	0.317952	0.806009
1734	chr1	89707500	89707699	FALSE	Stable	1.76627	0.00415326	1.46592	0.00998286	1.0074	0.258844
1735	chr1	89708550	89708849	FALSE	Stable	3.10892	7.17519e-07	2.7632	1.40461e-06	0.635668	0.585475
1736	chr1	89709150	89709249	FALSE	Stable	2.65453	1.99998e-05	1.17569	0.0389759	0.451887	0.723558
1737	chr1	89709600	89709699	FALSE	other	1.83209	0.00296172	0.967142	0.0899606	0.837258	0.402097
1738	chr1	89735000	89735549	FALSE	other	3.02079	1.40821e-06	0.671419	0.241219	0.897174	0.348504
1739	chr1	89846600	89846749	FALSE	other	2.01137	0.00112408	0.476812	0.407328	1.08977	0.202758
1740	chr1	89848950	89849299	TRUE	HH_dep	2.35252	0.00014686	0.580917	0.311448	1.73529	0.0113222
1741	chr1	89899200	89899449	FALSE	HH_dep	2.41444	9.90689e-05	-0.271451	0.639997	1.80249	0.00767568
1742	chr1	90051800	90051899	FALSE	HH_dep	1.71874	0.00527363	-0.140506	0.809543	1.50494	0.038911
1743	chr1	90052150	90052499	FALSE	Stable	2.84998	5.0147e-06	1.73802	0.00224978	0.22856	0.864876
1744	chr1	90054000	90054199	FALSE	other	0.759521	0.217153	3.5056	1.38849e-09	-0.758601	0.473457
1745	chr1	90118550	90118899	TRUE	Stable	2.18635	0.000407837	3.00678	1.66492e-07	0.149083	0.914372
1746	chr1	90119150	90119299	TRUE	Stable	2.02108	0.00106356	2.30576	5.26586e-05	0.276721	0.831596
1747	chr1	90119700	90119949	TRUE	Stable	2.90192	3.42462e-06	1.74489	0.00216184	0.443906	0.728342
1748	chr1	90153250	90153399	FALSE	Stable	4.15543	7.91154e-11	2.21735	0.00010018	0.336559	0.793931
1749	chr1	90153850	90154199	FALSE	Stable	1.45825	0.0177857	3.8242	4.88359e-11	-0.0715101	0.961502
1750	chr1	90205150	90205299	FALSE	other	3.89859	8.99027e-10	0.973228	0.0879328	0.096754	0.94588
1751	chr1	90280700	90280799	FALSE	Stable	2.06084	0.000850569	2.93551	3.14841e-07	0.699157	0.529101
1752	chr1	90289950	90290099	FALSE	other	2.13199	0.000563092	0.706511	0.216754	0.657536	0.56611
1753	chr1	90299950	90300149	FALSE	Stable	2.19764	0.000381406	2.17375	0.000136128	0.585295	0.628149
1754	chr1	90300500	90300849	FALSE	Stable	1.60131	0.00929226	3.49381	1.57512e-09	-0.33895	0.792656
1755	chr1	90335350	90335649	TRUE	Stable	2.54799	4.15162e-05	2.65652	3.42346e-06	-0.3661	0.777442
1756	chr1	90337650	90338049	TRUE	Stable	1.5788	0.0103281	3.22039	2.28776e-08	-0.674827	0.551578
1757	chr1	90338400	90338499	TRUE	other	0.475135	0.441583	2.28879	5.96224e-05	-0.838618	0.400956
1758	chr1	90373650	90373749	FALSE	other	-0.538579	0.382391	1.98014	0.000504217	-1.2226	0.12784
1759	chr1	90374250	90374599	FALSE	Stable	1.73791	0.00479052	2.76648	1.36955e-06	-0.47913	0.705447
1760	chr1	90375150	90375449	FALSE	other	1.1614	0.0590008	2.5539	7.85855e-06	-0.691242	0.536487
1761	chr1	90433550	90433799	FALSE	Stable	2.08818	0.000726311	2.6171	4.72666e-06	0.178122	0.897234
1762	chr1	90433950	90434099	FALSE	Stable	3.43259	5.34082e-08	2.10047	0.000226161	0.305164	0.814419
1763	chr1	90434300	90434649	FALSE	Stable	1.94644	0.00160968	3.40334	3.87416e-09	-0.073042	0.960725
1764	chr1	90434850	90435249	FALSE	other	3.35617	1.00498e-07	0.900218	0.11475	0.513404	0.681383
1765	chr1	90440800	90440949	FALSE	other	-0.00964563	0.987384	2.35765	3.58373e-05	-1.07117	0.214375
1766	chr1	90480850	90481199	FALSE	other	0.500478	0.417308	2.86086	6.07257e-07	-1.39527	0.0639772
1767	chr1	90481600	90482249	FALSE	Stable	2.29374	0.00021289	3.57343	6.95132e-10	-0.466392	0.713608
1768	chr1	90519500	90519749	FALSE	Stable	2.895	3.60626e-06	2.97144	2.28063e-07	-0.104127	0.941187
1769	chr1	90520200	90520349	FALSE	Stable	2.17238	0.000443544	3.14792	4.5391e-08	-0.000500121	0.999669
1770	chr1	90544050	90544249	FALSE	Stable	3.34446	1.10116e-07	1.22679	0.0312037	0.280719	0.828662
1771	chr1	90602900	90603999	FALSE	Stable	3.20785	3.31124e-07	2.55491	7.79391e-06	0.461613	0.717723
1772	chr1	90650950	90651649	FALSE	Stable	2.64555	2.12707e-05	2.60038	5.40916e-06	0.207267	0.878387
1773	chr1	90743850	90744749	FALSE	Stable	2.83359	5.64115e-06	2.59681	5.57373e-06	0.638505	0.583089
1774	chr1	90745000	90745249	FALSE	Stable	3.11559	6.81152e-07	1.13975	0.0453694	0.721066	0.509282
1775	chr1	90835750	90835999	FALSE	Stable	2.04895	0.000911752	2.16844	0.000141363	0.432935	0.734934
1776	chr1	90836050	90836299	FALSE	Stable	3.04138	1.20811e-06	2.37116	3.23835e-05	0.63908	0.582379
1777	chr1	90836600	90836749	FALSE	Stable	1.42577	0.0204853	2.88787	4.79375e-07	0.0965016	0.945958
1778	chr1	90836800	90836999	FALSE	Stable	2.80489	6.93638e-06	2.21475	0.000102073	0.562447	0.646217
1779	chr1	90837400	90837549	FALSE	other	3.1011	7.6315e-07	0.924184	0.105255	0.826802	0.411706
1780	chr1	90837800	90838249	FALSE	Stable	2.86766	4.42637e-06	2.80769	9.58394e-07	0.439722	0.731246
1781	chr1	90838650	90838949	FALSE	Stable	2.99663	1.68917e-06	1.50287	0.00824504	0.872831	0.369344
1782	chr1	90884850	90885049	FALSE	Stable	2.56921	3.57796e-05	1.4835	0.00912414	0.0514908	0.973387
1783	chr1	90885200	90886549	FALSE	Stable	3.12069	6.54969e-07	3.2836	1.25319e-08	-0.143816	0.917547
1784	chr1	90886650	90886899	FALSE	Stable	1.29478	0.0353378	2.31892	4.78458e-05	0.203731	0.880642
1785	chr1	91038850	91038949	FALSE	Stable	3.32983	1.23609e-07	2.0607	0.000296586	1.26912	0.10797
1786	chr1	91061950	91062199	FALSE	Stable	2.81713	6.35407e-06	2.25352	7.72615e-05	0.542837	0.661407
1787	chr1	91076600	91076849	FALSE	Stable	4.3711	9.381e-12	1.67696	0.00320091	0.352358	0.785264
1788	chr1	91098600	91098949	FALSE	Stable	2.5096	5.32739e-05	1.3683	0.0161981	0.644709	0.57713
1789	chr1	91249550	91249849	TRUE	Stable	1.58578	0.0099947	2.70373	2.31564e-06	0.433072	0.734934
1790	chr1	91250400	91250949	TRUE	Stable	3.00792	1.55198e-06	2.02565	0.000374272	0.94423	0.309065
1791	chr1	91397950	91399299	TRUE	Stable	4.32999	1.42879e-11	3.79619	6.58812e-11	0.4946	0.694103
1792	chr1	91412850	91413099	FALSE	Stable	3.35423	1.0174e-07	1.57392	0.00565527	0.575821	0.63585
1793	chr1	91413450	91414699	TRUE	Stable	3.24371	2.47599e-07	2.40592	2.48357e-05	0.634353	0.586502
1794	chr1	91456350	91456449	FALSE	other	1.09538	0.0749165	1.62357	0.00430838	0.178852	0.896895
1795	chr1	91585450	91585699	FALSE	other	3.56361	1.76865e-08	0.999546	0.0796232	-0.264547	0.839161
1796	chr1	91595950	91596049	FALSE	other	1.17316	0.0564833	1.7264	0.0024058	0.00815784	0.995909
1797	chr1	91596350	91596999	FALSE	Stable	2.04976	0.000907591	2.71777	2.05866e-06	0.294624	0.821893
1798	chr1	91599700	91599899	FALSE	other	1.86448	0.00249858	0.71568	0.210681	-0.105972	0.940169
1799	chr1	91600100	91602249	FALSE	Stable	3.86444	1.23289e-09	3.1837	3.23685e-08	0.31834	0.805713
1800	chr1	91605350	91605499	FALSE	Stable	2.13238	0.00056213	2.29075	5.88027e-05	-0.186057	0.892058
1801	chr1	91606150	91606249	FALSE	Stable	1.28006	0.0374304	2.46856	1.53808e-05	-0.213468	0.875111
1802	chr1	91667900	91668099	FALSE	other	0.625759	0.309671	2.29934	5.52223e-05	-0.114982	0.934354
1803	chr1	91684700	91686649	FALSE	Stable	3.56266	1.78411e-08	3.1131	6.25527e-08	0.244182	0.853581
1804	chr1	91728700	91728899	FALSE	Stable	2.12408	0.000589452	2.00719	0.000422994	0.346159	0.788822
1805	chr1	91729000	91729149	FALSE	Stable	3.20533	3.37312e-07	2.72258	1.97837e-06	0.868701	0.372638
1806	chr1	91729650	91730049	FALSE	other	3.06016	1.04518e-06	0.943266	0.0982391	0.886698	0.357784
1807	chr1	91731000	91731899	TRUE	Stable	3.41087	6.39336e-08	2.77582	1.26371e-06	0.513451	0.681383
1808	chr1	91732200	91732899	TRUE	Stable	3.26907	2.03085e-07	2.96793	2.35474e-07	0.488541	0.697784
1809	chr1	91754750	91755049	FALSE	Stable	2.71254	1.33804e-05	1.89229	0.000883033	0.300202	0.818314
1810	chr1	91757200	91757349	FALSE	Stable	2.26836	0.000248652	2.44903	1.78555e-05	0.205284	0.879775
1811	chr1	91757850	91758099	FALSE	Stable	4.19048	5.6414e-11	1.24332	0.0289953	0.605382	0.610429
1812	chr1	91759400	91759599	FALSE	Stable	3.51637	2.63696e-08	2.03711	0.00034698	0.466827	0.713604
1813	chr1	91759850	91760199	FALSE	Stable	2.6628	1.89399e-05	2.23041	9.12903e-05	-0.087653	0.95192
1814	chr1	91760350	91760699	FALSE	Stable	3.51625	2.63951e-08	2.00969	0.000415858	0.302072	0.816662
1815	chr1	91769400	91769549	FALSE	other	2.28126	0.000229905	1.05724	0.0635653	1.19633	0.140398
1816	chr1	91769750	91770199	FALSE	Stable	3.53579	2.24038e-08	1.6301	0.00415601	1.28477	0.101925
1817	chr1	91770300	91770449	TRUE	Stable	1.57807	0.0103594	2.45467	1.7116e-05	0.314907	0.808044
1818	chr1	91770500	91770899	TRUE	Stable	4.41639	5.94519e-12	2.78421	1.17405e-06	1.27788	0.104235
1819	chr1	91771050	91771449	TRUE	Stable	2.65652	1.97396e-05	1.53966	0.00679859	1.23178	0.123851
1820	chr1	91771700	91771849	FALSE	other	1.91742	0.00188666	0.0417305	0.942775	1.25754	0.11223
1821	chr1	91799250	91799349	FALSE	HH_dep	2.01137	0.00112408	-0.386635	0.502881	1.63006	0.0207902
1822	chr1	91799850	91801299	FALSE	Stable	4.0252	2.74916e-10	4.11863	1.80097e-12	0.470572	0.711642
1823	chr1	91801450	91801999	FALSE	Stable	3.07949	8.9926e-07	2.41465	2.32326e-05	0.519484	0.676939
1824	chr1	91802100	91802249	FALSE	Stable	1.37165	0.0257831	2.89831	4.36953e-07	0.446276	0.727194
1825	chr1	91844350	91844449	TRUE	Stable	2.38793	0.000117242	4.04867	4.03934e-12	-0.0869041	0.952269
1826	chr1	91844900	91845249	TRUE	Stable	2.69641	1.49529e-05	3.14092	4.85426e-08	0.107921	0.939031
1827	chr1	91845450	91845599	FALSE	Stable	2.57502	3.44372e-05	2.55905	7.54373e-06	-0.0151686	0.991397
1828	chr1	91952400	91953049	FALSE	Stable	2.54925	4.11678e-05	2.94449	2.90498e-07	-0.433278	0.734722
1829	chr1	91953300	91953549	FALSE	Stable	1.22365	0.046641	2.96887	2.33458e-07	-0.608768	0.60806
1830	chr1	91954900	91955049	FALSE	other	0.628311	0.307782	2.99193	1.89386e-07	0.207415	0.878318
1831	chr1	91962450	91962649	FALSE	other	0.288032	0.642011	2.69683	2.45108e-06	-0.703434	0.525653
1832	chr1	91962800	91964549	FALSE	Stable	2.78486	8.03962e-06	3.02503	1.40399e-07	-0.611689	0.606043
1833	chr1	91964800	91965649	FALSE	Stable	2.89282	3.66152e-06	3.31243	9.42933e-09	-0.2983	0.819887
1834	chr1	92082750	92083049	FALSE	Stable	2.76844	9.03971e-06	1.13059	0.0471551	1.08665	0.204899
1835	chr1	92083150	92084349	FALSE	Stable	4.183	6.10131e-11	3.16053	4.02595e-08	0.661324	0.56289
1836	chr1	92091350	92091449	FALSE	Stable	2.04828	0.000914093	1.63819	0.00397461	-0.199764	0.88288
1837	chr1	92164250	92164349	FALSE	HH_dep	2.76318	9.34994e-06	-1.23155	0.030549	1.97612	0.00247541
1838	chr1	92178350	92178499	FALSE	Stable	1.29973	0.0346317	1.90369	0.000821757	0.170453	0.901909
1839	chr1	92178800	92179849	FALSE	Stable	3.07056	9.62198e-07	3.07114	9.25043e-08	-0.0393124	0.980033
1840	chr1	92180450	92181399	TRUE	Stable	3.77205	2.84736e-09	3.57884	6.56939e-10	0.0716029	0.961474
1841	chr1	92370750	92371049	FALSE	Stable	2.46678	7.06639e-05	1.95669	0.000586499	0.474516	0.708454
1842	chr1	92371150	92373249	TRUE	Stable	3.33879	1.15071e-07	2.27728	6.49482e-05	0.94099	0.311871
1843	chr1	92377550	92377849	FALSE	Stable	2.65867	1.9471e-05	1.30467	0.0218846	0.9997	0.264492
1844	chr1	92378650	92379149	FALSE	Stable	2.72617	1.21525e-05	2.31283	5.00456e-05	0.791019	0.444363
1845	chr1	92398250	92398649	TRUE	Stable	2.79098	7.67696e-06	1.43637	0.0115845	1.31772	0.0891836
1846	chr1	92398950	92399049	FALSE	other	2.93327	2.71078e-06	1.04584	0.0664868	1.27757	0.104308
1847	chr1	92437250	92437349	FALSE	other	2.70584	1.40207e-05	0.704884	0.217839	0.974001	0.285234
1848	chr1	92437750	92437899	FALSE	other	1.50227	0.0146422	0.925679	0.104686	0.962547	0.29384
1849	chr1	92473400	92473649	FALSE	Stable	2.75962	9.59503e-06	2.14516	0.000166423	0.577568	0.634225
1850	chr1	92474000	92474249	FALSE	other	1.11694	0.0693623	2.47223	1.49523e-05	0.198258	0.883883
1851	chr1	92641650	92641949	FALSE	Stable	2.98063	1.90797e-06	1.91066	0.000787782	0.356837	0.782887
1852	chr1	92772850	92773099	FALSE	Stable	1.58754	0.00991147	2.96913	2.32959e-07	0.0440302	0.976929
1853	chr1	92774950	92775099	FALSE	Stable	2.73508	1.14164e-05	1.71026	0.00263925	0.414963	0.746395
1854	chr1	92779300	92779549	FALSE	other	2.50124	5.63483e-05	0.482844	0.401336	0.404423	0.752269
1855	chr1	92788900	92788999	FALSE	other	1.78294	0.00382153	0.594716	0.299801	-0.16189	0.907401
1856	chr1	92789550	92789699	FALSE	other	0.891573	0.147342	2.79496	1.06843e-06	-0.607263	0.609385
1857	chr1	92790250	92792449	TRUE	Stable	4.15323	8.08183e-11	3.43205	2.89404e-09	0.00253551	0.998646
1858	chr1	92831650	92832899	TRUE	Stable	4.28622	2.21285e-11	3.86459	3.13343e-11	0.443312	0.728594
1859	chr1	92832950	92833049	FALSE	Stable	2.54184	4.30121e-05	1.39513	0.0142233	1.11903	0.183915
1860	chr1	92933750	92935199	TRUE	Stable	2.97362	2.01016e-06	2.76911	1.34025e-06	0.405203	0.75194
1861	chr1	93175550	93178199	TRUE	Stable	4.30805	1.77601e-11	4.21968	5.57502e-13	0.245979	0.85234
1862	chr1	93209700	93209849	FALSE	other	3.53209	2.30486e-08	0.722156	0.206687	-0.0186787	0.989736
1863	chr1	93210200	93210499	FALSE	Stable	1.47897	0.0162621	2.54788	8.24313e-06	-0.294492	0.821942
1864	chr1	93214250	93214649	FALSE	Stable	2.78497	8.03339e-06	1.84736	0.00116905	0.48695	0.698988
1865	chr1	93214900	93215099	FALSE	Stable	1.96587	0.00145225	3.14126	4.83754e-08	0.38321	0.766582
1866	chr1	93216250	93216499	FALSE	Stable	3.85296	1.36859e-09	1.59077	0.0051591	-0.343438	0.790273
1867	chr1	93218150	93218349	FALSE	Stable	1.77145	0.00404962	2.92682	3.39878e-07	0.140748	0.919442
1868	chr1	93218450	93218699	FALSE	other	1.20196	0.0506875	2.76451	1.38994e-06	0.218041	0.872317
1869	chr1	93219900	93222099	TRUE	Stable	4.04699	2.24582e-10	3.78421	7.5351e-11	0.256204	0.844478
1870	chr1	93225050	93225149	FALSE	Stable	2.92893	2.80123e-06	2.10274	0.000222779	0.79851	0.437394
1871	chr1	93225450	93226249	FALSE	Stable	3.25502	2.26986e-07	2.62453	4.445e-06	0.356751	0.782887
1872	chr1	93232750	93233349	FALSE	Stable	3.16178	4.75053e-07	1.57947	0.00548829	0.44532	0.727768
1873	chr1	93279350	93279449	FALSE	other	2.36733	0.000133996	0.954355	0.0943113	0.386023	0.764012
1874	chr1	93305500	93305699	FALSE	Stable	1.99164	0.00125626	2.08806	0.000246524	-0.129636	0.925958
1875	chr1	93342300	93342699	TRUE	Stable	3.54949	2.002e-08	3.28053	1.29214e-08	0.456365	0.720656
1876	chr1	93342950	93343499	TRUE	Stable	3.38492	7.88414e-08	1.90048	0.000838769	0.709494	0.519415
1877	chr1	93343700	93344099	TRUE	Stable	2.85551	4.8257e-06	2.43844	1.93907e-05	0.702262	0.526389
1878	chr1	93444800	93445649	TRUE	Stable	3.56171	1.79898e-08	2.70965	2.20625e-06	0.662885	0.562003
1879	chr1	93445750	93445949	TRUE	Stable	2.28364	0.000226662	1.72556	0.00241757	0.944035	0.309162
1880	chr1	93477750	93480249	TRUE	Stable	3.89141	9.62489e-10	3.51031	1.32232e-09	0.669888	0.556556
1881	chr1	93511750	93511899	TRUE	Stable	1.50023	0.0147768	2.30308	5.36951e-05	0.493284	0.694914
1882	chr1	93617650	93617849	FALSE	Stable	1.8786	0.00232314	2.22816	9.2815e-05	-0.578218	0.633878
1883	chr1	93617900	93618049	FALSE	Stable	3.34047	1.13465e-07	2.88092	5.09928e-07	-0.150311	0.913838
1884	chr1	93618200	93619199	FALSE	Stable	3.00834	1.5475e-06	3.25599	1.62677e-08	-0.0946232	0.947346
1885	chr1	93635350	93635649	TRUE	Stable	1.81376	0.00325685	2.81232	9.21844e-07	-0.0345529	0.982932
1886	chr1	93636000	93636349	TRUE	Stable	2.4968	5.7969e-05	2.62403	4.46393e-06	0.252515	0.847326
1887	chr1	93668950	93669199	FALSE	other	3.07562	9.26897e-07	0.644624	0.260535	0.983134	0.278263
1888	chr1	93686100	93686199	FALSE	other	2.19079	0.000396803	0.893906	0.117325	0.687028	0.540837
1889	chr1	93754050	93754199	FALSE	other	2.06786	0.000816944	1.01321	0.0754975	0.757578	0.474436
1890	chr1	93754250	93755449	TRUE	Stable	3.00043	1.64112e-06	3.38616	4.59445e-09	0.252604	0.847261
1891	chr1	93801150	93801299	FALSE	other	3.1546	5.01901e-07	0.644624	0.260535	0.479947	0.70499
1892	chr1	93801350	93802549	FALSE	Stable	3.94556	5.84352e-10	2.91916	3.63452e-07	0.649784	0.573062
1893	chr1	93803400	93804449	FALSE	Stable	3.08051	8.9211e-07	3.87633	2.7422e-11	0.37159	0.773808
1894	chr1	93824500	93824699	FALSE	Stable	2.09549	0.000696162	1.92348	0.000725525	-0.446145	0.727282
1895	chr1	93825000	93825149	FALSE	Stable	2.01996	0.00107056	2.61613	4.76386e-06	0.217121	0.872706
1896	chr1	93825250	93825599	FALSE	Stable	3.06014	1.04531e-06	2.37592	3.12411e-05	0.35733	0.782669
1897	chr1	94035300	94035649	FALSE	Stable	3.41352	6.27337e-08	1.92987	0.00069695	0.133531	0.924025
1898	chr1	94078500	94078599	FALSE	other	0.0483215	0.937981	1.90807	0.000800192	-0.884713	0.35911
1899	chr1	95313700	95314099	FALSE	Stable	2.95781	2.26473e-06	2.03764	0.000345822	0.619369	0.599064
1900	chr1	96300250	96300349	FALSE	SHHnullonly	-1.10339	0.0728045	2.26291	7.23123e-05	-1.79246	0.00811875
1901	chr1	96362050	96362149	FALSE	Stable	2.12294	0.000592921	1.732	0.0023293	0.390937	0.761389
1902	chr1	96362800	96362899	FALSE	other	2.61322	2.65238e-05	-0.611377	0.286361	1.20598	0.135909
1903	chr1	96363450	96363599	FALSE	other	2.28082	0.000230412	-0.0654873	0.91073	0.744784	0.487054
1904	chr1	96693600	96693749	FALSE	other	2.83502	5.58461e-06	0.680808	0.23448	0.135594	0.922937
1905	chr1	96778250	96778649	FALSE	Stable	3.25123	2.34027e-07	1.47451	0.00955544	0.742494	0.489862
1906	chr1	96778800	96779199	FALSE	Stable	2.71098	1.35384e-05	1.35269	0.0174753	0.959367	0.296059
1907	chr1	96779400	96779549	FALSE	Stable	1.92026	0.00185912	1.24455	0.0288393	0.965656	0.291635
1908	chr1	97595100	97595549	FALSE	Stable	2.52822	4.71403e-05	1.91129	0.000784494	0.359352	0.781491
1909	chr1	97595900	97595999	FALSE	other	0.961636	0.118009	0.893906	0.117325	0.0400437	0.979378
1910	chr1	97596400	97596549	FALSE	other	3.30549	1.51036e-07	0.788701	0.167527	-0.088842	0.950971
1911	chr1	97611200	97611849	FALSE	Stable	3.44423	4.85919e-08	4.80933	4.10148e-16	0.0187603	0.989716
1912	chr1	97612200	97612299	FALSE	Stable	2.24559	0.000285331	1.27893	0.0246483	-0.634859	0.586089
1913	chr1	97612550	97612699	FALSE	Stable	2.09799	0.000685838	2.62973	4.26738e-06	-0.552511	0.653564
1914	chr1	97624950	97625049	FALSE	other	1.03032	0.0938276	3.38384	4.69094e-09	-0.366041	0.77749
1915	chr1	97657600	97657699	FALSE	other	2.65178	2.03548e-05	-0.222331	0.701996	0.8555	0.384123
1916	chr1	97661500	97661949	FALSE	Stable	4.15895	7.67705e-11	3.10111	6.99607e-08	0.0260429	0.986486
1917	chr1	97769200	97769299	FALSE	Stable	1.96221	0.00147892	1.3283	0.0196073	-0.134031	0.923775
1918	chr1	97769550	97770699	FALSE	Stable	3.38644	7.78394e-08	3.09448	7.45069e-08	0.33531	0.794889
1919	chr1	97924100	97924399	FALSE	Stable	3.5961	1.34431e-08	1.7172	0.00253744	0.851944	0.387505
1920	chr1	97949400	97949499	FALSE	Stable	4.40999	6.35039e-12	3.04297	1.1934e-07	0.35459	0.783943
1921	chr1	97971850	97971949	FALSE	other	0.0531867	0.931864	1.95514	0.00059246	0.0855214	0.953315
1922	chr1	97974850	97974949	FALSE	other	3.34427	1.10116e-07	0.515781	0.369741	1.22697	0.125963
1923	chr1	97975250	97975649	FALSE	HH_dep	4.15692	7.8259e-11	-0.0057772	0.992151	1.96239	0.00270797
1924	chr1	97976450	97977249	FALSE	HH_dep	3.8848	1.02219e-09	0.319052	0.582085	2.248	0.000341285
1925	chr1	97977450	97977549	FALSE	HH_dep	2.02154	0.00106128	1.11288	0.0507366	1.47006	0.0458039
1926	chr1	98048200	98048549	FALSE	HH_sens	3.42266	5.80984e-08	1.52402	0.00737993	1.45387	0.0494625
1927	chr1	98048900	98049049	FALSE	other	1.81333	0.00326252	-0.647772	0.258234	1.4293	0.0551124
1928	chr1	98051400	98051549	FALSE	other	3.53209	2.30486e-08	0.523793	0.362139	1.40677	0.0609472
1929	chr1	98095350	98095749	FALSE	Stable	3.26627	2.0718e-07	1.72711	0.00239733	0.655759	0.568168
1930	chr1	98095850	98096049	FALSE	other	3.52289	2.49769e-08	0.472037	0.412219	0.698281	0.529902
1931	chr1	98162050	98162149	FALSE	other	-0.193529	0.755331	1.732	0.0023293	-0.933872	0.317975
1932	chr1	100231650	100231949	FALSE	Stable	2.60553	2.80038e-05	2.21848	9.94233e-05	0.349698	0.78711
1933	chr1	104294000	104294099	FALSE	Stable	2.36354	0.000136935	1.68699	0.00302066	0.655775	0.568165
1934	chr1	105081350	105081749	FALSE	Stable	1.42426	0.0206195	2.94514	2.89027e-07	-0.23261	0.861837
1935	chr1	105083300	105083449	FALSE	Stable	2.78065	8.27767e-06	1.14581	0.0442213	-0.565454	0.643992
1936	chr1	105083750	105083849	FALSE	Stable	1.40075	0.022783	2.34816	3.84534e-05	-0.386012	0.764012
1937	chr1	105088500	105088699	FALSE	other	1.00503	0.102255	3.87798	2.6931e-11	-0.564391	0.645028
1938	chr1	105172400	105172499	FALSE	other	0.422795	0.493461	2.32297	4.6423e-05	0.0873006	0.9521
1939	chr1	105176350	105176499	FALSE	Stable	1.73019	0.00497946	2.72011	2.01801e-06	0.306201	0.813658
1940	chr1	105177700	105177849	FALSE	other	1.16501	0.0582014	2.28879	5.96224e-05	-0.148742	0.914443
1941	chr1	105178500	105178599	FALSE	Stable	2.12367	0.000590527	3.64217	3.43583e-10	0.0553313	0.970896
1942	chr1	105663200	105663599	FALSE	Stable	2.45503	7.62382e-05	2.67285	2.99612e-06	0.620788	0.598287
1943	chr1	105664200	105664299	FALSE	Stable	1.31507	0.0325297	2.34816	3.84534e-05	0.525517	0.673649
1944	chr1	105818850	105818999	FALSE	other	2.27587	0.000237292	0.928106	0.103784	1.32699	0.0862279
1945	chr1	105981100	105981799	FALSE	Stable	1.78057	0.0038656	3.70509	1.75781e-10	-0.959416	0.296059
1946	chr1	105989850	105990049	FALSE	other	0.817072	0.184228	3.2031	2.69857e-08	0.769038	0.463929
1947	chr1	105990450	105990649	TRUE	Stable	3.34865	1.06506e-07	2.74777	1.59912e-06	0.156099	0.910357
1948	chr1	105991250	105991349	FALSE	other	0.403546	0.513622	2.30617	5.25416e-05	-0.344022	0.790002
1949	chr1	106170650	106171349	FALSE	Stable	3.22771	2.81471e-07	3.09795	7.21168e-08	0.439623	0.73141
1950	chr1	106171700	106172149	FALSE	Stable	4.37061	9.42671e-12	2.78976	1.11786e-06	0.132984	0.924292
1951	chr1	106172250	106172499	FALSE	Stable	4.00148	3.46536e-10	2.72258	1.97837e-06	-0.322617	0.80331
1952	chr1	106277550	106277649	FALSE	other	-1.2421	0.0434215	2.62735	4.34507e-06	-1.07642	0.210824
1953	chr1	106538450	106538599	FALSE	SHHnullonly	-0.316792	0.608717	2.82647	8.16299e-07	-1.56943	0.0285392
1954	chr1	106598400	106598549	FALSE	other	2.25308	0.000272461	0.387309	0.502329	0.838822	0.400844
1955	chr1	106620400	106620499	FALSE	Stable	1.26895	0.0390951	2.23731	8.68139e-05	-0.406958	0.750755
1956	chr1	106713650	106714249	TRUE	Stable	4.62268	6.9863e-13	1.89989	0.000841775	1.2283	0.125516
1957	chr1	106714600	106714849	TRUE	Stable	1.88426	0.00225297	1.99672	0.000453258	1.02399	0.247144
1958	chr1	106743950	106744049	FALSE	Stable	3.25872	2.19972e-07	1.91599	0.000760951	-0.258783	0.842389
1959	chr1	106759900	106760299	TRUE	Stable	2.84578	5.17243e-06	2.14144	0.000170846	0.15313	0.911948
1960	chr1	106760650	106760849	FALSE	Stable	3.07442	9.35891e-07	1.89501	0.000867737	0.166973	0.904709
1961	chr1	106795600	106796699	TRUE	Stable	4.0145	3.05457e-10	3.2044	2.66739e-08	0.548318	0.657153
1962	chr1	106981050	106981349	FALSE	Stable	4.30778	1.77664e-11	2.04065	0.000338892	0.665615	0.559382
1963	chr1	107908450	107908649	FALSE	other	3.1968	3.59404e-07	0.308972	0.594274	0.0592166	0.968764
1964	chr1	107915050	107915249	FALSE	other	3.41246	6.31296e-08	0.858663	0.132684	0.212018	0.875757
1965	chr1	107917350	107917449	FALSE	HH_dep	3.03688	1.24463e-06	0.280786	0.62826	1.74365	0.0108056
1966	chr1	108281500	108281799	FALSE	Stable	3.64735	8.5777e-09	1.67016	0.00332407	0.950236	0.304264
1967	chr1	108282050	108282149	FALSE	other	3.36644	9.22412e-08	0.945422	0.0974577	1.40858	0.0605133
1968	chr1	109890000	109890099	FALSE	other	2.83109	5.73889e-06	-0.0607561	0.916896	0.873233	0.369232
1969	chr1	110446750	110446899	FALSE	Stable	3.20014	3.51023e-07	2.30308	5.36951e-05	-0.115376	0.934057
1970	chr1	110447450	110448299	FALSE	Stable	4.04644	2.25754e-10	3.81926	5.16011e-11	0.613142	0.604535
1971	chr1	110448350	110448849	FALSE	Stable	2.07263	0.000794515	3.90497	2.02043e-11	0.140608	0.919587
1972	chr1	110470650	110470799	FALSE	Stable	2.84279	5.28341e-06	1.45658	0.0104589	-0.215316	0.873835
1973	chr1	111017950	111018149	FALSE	Stable	3.73127	4.09824e-09	1.33802	0.0187388	0.0514716	0.973405
1974	chr1	111018400	111018549	FALSE	Stable	1.98292	0.00131862	2.22727	9.33812e-05	-0.265124	0.838583
1975	chr1	111019000	111019149	FALSE	Stable	2.16165	0.000472566	1.12399	0.0484886	0.0058602	0.997023
1976	chr1	111019300	111022149	FALSE	Stable	4.32433	1.50264e-11	4.46074	3.1592e-14	0.354634	0.783943
1977	chr1	111022300	111022499	FALSE	Stable	1.95952	0.00150028	1.67257	0.00328115	0.516215	0.679311
1978	chr1	111697500	111697749	FALSE	Stable	3.73127	4.09824e-09	1.57451	0.0056374	1.14432	0.168963
1979	chr1	111698050	111699499	TRUE	Stable	4.39609	7.30446e-12	3.21843	2.33028e-08	1.26533	0.109373
1980	chr1	111699750	111700549	TRUE	Stable	3.39307	7.38398e-08	1.72847	0.00237787	1.16802	0.155758
1981	chr1	111856900	111856999	FALSE	Stable	2.91111	3.20159e-06	2.73884	1.72344e-06	0.172274	0.900777
1982	chr1	111857550	111857799	FALSE	Stable	2.0072	0.00115067	3.08599	8.03849e-08	0.217339	0.872607
1983	chr1	111858200	111858349	FALSE	Stable	3.56584	1.73455e-08	1.44474	0.0111012	1.10867	0.190747
1984	chr1	111858450	111858599	FALSE	Stable	1.50227	0.0146422	1.9195	0.000743868	0.557815	0.649555
1985	chr1	111864250	111864899	FALSE	Stable	3.80352	2.14301e-09	3.89306	2.28401e-11	0.4584	0.719401
1986	chr1	118310750	118311699	TRUE	Stable	3.79166	2.38365e-09	3.37017	5.37566e-09	0.475794	0.707973
1987	chr1	118322000	118322249	FALSE	Stable	2.51842	5.01761e-05	1.80746	0.00149	0.0220248	0.988541
1988	chr1	118388000	118390399	TRUE	Stable	4.52753	1.86181e-12	3.62305	4.18083e-10	0.512764	0.681706
1989	chr1	118458850	118459699	FALSE	Stable	4.26889	2.62626e-11	3.49671	1.52687e-09	0.732993	0.498306
1990	chr1	118799200	118799449	FALSE	Stable	3.02247	1.39101e-06	1.71101	0.00262838	0.284513	0.826855
1991	chr1	118825100	118825499	TRUE	Stable	2.61703	2.58789e-05	2.16695	0.000142837	0.149274	0.914359
1992	chr1	118826200	118826449	FALSE	Stable	3.21856	3.03262e-07	2.28875	5.96247e-05	0.89522	0.349897
1993	chr1	118878700	118878999	FALSE	Stable	3.83452	1.62382e-09	1.61187	0.00459254	0.604522	0.610947
1994	chr1	118879150	118879249	FALSE	Stable	1.95155	0.00156506	2.87983	5.13777e-07	0.0467505	0.975557
1995	chr1	118880750	118880849	FALSE	other	1.78516	0.00377996	0.548884	0.339222	0.791495	0.444174
1996	chr1	118901800	118902099	FALSE	Stable	2.45246	7.74623e-05	1.9032	0.000824436	0.929012	0.321873
1997	chr1	118902350	118902949	FALSE	Stable	3.30403	1.52822e-07	2.96914	2.32959e-07	0.449823	0.725418
1998	chr1	118903850	118903949	FALSE	Stable	1.88942	0.0021908	1.36694	0.0163084	-0.509308	0.683912
1999	chr1	118904100	118905999	FALSE	Stable	3.74308	3.68928e-09	3.20927	2.54861e-08	0.493382	0.694914
[truncated: 58,037 more rows]

## Sheet: Stable H3K27ac
Peak_ID	Chromosome	Start	End	Gli3_binding	Type	WTinput_FC	WTinput_adjPval	SHHnullinput_FC	SHHnullinput_adjPval	WTSHHnull_FC	WTSHHnull_adjPval
2	chr1	3399800	3399899	FALSE	Stable	2.04521	0.000928415	1.89501	0.000867737	0.129427	0.925958
4	chr1	4571150	4571949	TRUE	Stable	3.87923	1.07821e-09	2.84243	7.11972e-07	0.209636	0.8772
6	chr1	4785300	4785749	FALSE	Stable	3.46289	4.14655e-08	1.97078	0.000536133	0.754165	0.478067
7	chr1	4786050	4786299	FALSE	Stable	2.30742	0.000194981	1.96289	0.000564329	0.63447	0.586398
8	chr1	4807550	4808299	FALSE	Stable	3.33381	1.19925e-07	2.9944	1.85661e-07	0.164329	0.906125
9	chr1	4829800	4829949	FALSE	Stable	2.91468	3.12584e-06	2.07904	0.000261817	0.81487	0.422637
10	chr1	4857100	4858399	TRUE	Stable	3.90832	8.25915e-10	2.9089	3.98129e-07	0.444974	0.727921
11	chr1	5083150	5083699	FALSE	Stable	4.11502	1.16766e-10	2.63277	4.16402e-06	0.308854	0.812099
12	chr1	6214200	6215399	FALSE	Stable	5.16965	1.93171e-15	4.15278	1.21654e-12	0.508542	0.684416
15	chr1	7088000	7089799	FALSE	Stable	4.00424	3.37746e-10	2.92944	3.32289e-07	0.368841	0.775832
16	chr1	7129150	7129249	FALSE	Stable	2.1111	0.000635561	1.18883	0.0368216	-0.0901651	0.950203
17	chr1	7130800	7130899	FALSE	Stable	1.55041	0.011793	2.41535	2.31144e-05	0.126721	0.92751
18	chr1	7131250	7131449	FALSE	Stable	2.96919	2.07808e-06	1.59119	0.00514858	-0.822301	0.416292
19	chr1	7132050	7132299	FALSE	Stable	2.09626	0.000692959	4.38977	7.58658e-14	-0.306035	0.813831
20	chr1	7397400	7397999	FALSE	Stable	3.45858	4.3032e-08	3.93488	1.44559e-11	0.490454	0.696918
21	chr1	7398500	7398649	FALSE	Stable	2.0383	0.00096514	1.24654	0.028582	0.764075	0.467954
22	chr1	7777350	7777999	FALSE	Stable	3.38276	8.02953e-08	2.766	1.37515e-06	-0.0585439	0.969308
25	chr1	8626600	8626749	FALSE	Stable	1.26855	0.0391499	2.30617	5.25416e-05	-1.0584	0.222163
26	chr1	8626850	8626999	FALSE	Stable	2.85414	4.87099e-06	2.07827	0.00026307	-0.825651	0.413265
27	chr1	8744850	8744949	FALSE	Stable	2.52401	4.83492e-05	2.20127	0.000112264	0.322743	0.803236
28	chr1	9544800	9544949	FALSE	Stable	3.02519	1.36397e-06	2.56513	7.1833e-06	1.02145	0.248905
29	chr1	9545750	9545949	FALSE	Stable	3.22271	2.93439e-07	2.43215	2.03746e-05	0.757347	0.474665
31	chr1	9700600	9700849	TRUE	Stable	2.21506	0.000344071	3.71007	1.67131e-10	-0.198884	0.883364
32	chr1	9747700	9748399	FALSE	Stable	2.79094	7.67934e-06	2.67679	2.90255e-06	0.338267	0.792957
33	chr1	9748700	9748899	FALSE	Stable	2.69817	1.47679e-05	1.89465	0.000869737	0.0355818	0.982407
34	chr1	9797800	9798049	FALSE	Stable	2.3412	0.000157971	1.9373	0.000664131	0.789854	0.445341
35	chr1	9798250	9798649	FALSE	Stable	2.57497	3.44512e-05	1.97321	0.000527819	1.1512	0.164945
36	chr1	9798900	9799049	FALSE	Stable	1.83083	0.00298005	1.20648	0.034083	0.179577	0.896516
38	chr1	9943150	9944199	FALSE	Stable	4.90114	3.68298e-14	3.21782	2.34416e-08	0.644068	0.577756
39	chr1	9944350	9944599	FALSE	Stable	4.84357	6.74053e-14	2.28212	6.26366e-05	0.542827	0.661407
40	chr1	10009150	10009699	FALSE	Stable	3.7496	3.47885e-09	1.53766	0.00687203	0.593814	0.62016
41	chr1	10037400	10038849	FALSE	Stable	5.03043	8.88925e-15	5.25931	9.01024e-19	0.390453	0.761858
43	chr1	10039750	10040299	FALSE	Stable	4.85035	6.28123e-14	2.97571	2.19485e-07	0.619866	0.598726
44	chr1	10231900	10233549	FALSE	Stable	3.65817	7.84425e-09	3.89828	2.16725e-11	0.490949	0.696467
45	chr1	10236100	10236649	FALSE	Stable	2.25908	0.000263419	3.31626	9.08139e-09	0.0452839	0.976271
46	chr1	10237050	10237549	FALSE	Stable	2.51424	5.16197e-05	2.4212	2.21321e-05	-0.207765	0.878138
47	chr1	10260750	10261349	FALSE	Stable	2.84617	5.15624e-06	1.96071	0.000572663	1.11087	0.189579
48	chr1	10261500	10262049	FALSE	Stable	3.37852	8.3188e-08	2.34833	3.84198e-05	0.996973	0.266778
49	chr1	10337050	10337199	FALSE	Stable	2.44862	7.93452e-05	1.20984	0.0336078	1.218	0.129927
50	chr1	10591750	10592099	FALSE	Stable	1.43711	0.0194972	2.86464	5.86668e-07	-0.043675	0.977226
52	chr1	10991200	10991299	FALSE	Stable	2.0473	0.000918156	1.63492	0.00404617	0.3916	0.761031
53	chr1	10993300	10995149	TRUE	Stable	4.76315	1.5324e-13	3.97047	9.66119e-12	0.453041	0.722953
55	chr1	11024650	11025149	FALSE	Stable	3.14747	5.30578e-07	3.66282	2.76349e-10	0.454168	0.722145
56	chr1	11025450	11025749	FALSE	Stable	2.52775	4.72863e-05	2.36683	3.34373e-05	0.390187	0.762038
59	chr1	11034450	11034649	FALSE	Stable	2.55971	3.82274e-05	1.37807	0.0154569	0.413703	0.747227
61	chr1	11199600	11199699	FALSE	Stable	1.75533	0.00438199	2.04523	0.000328668	0.701762	0.526567
62	chr1	11329100	11329449	FALSE	Stable	1.78564	0.00377121	3.258	1.59806e-08	-0.0222978	0.988304
63	chr1	11329500	11330499	FALSE	Stable	3.54941	2.00344e-08	3.42818	3.0132e-09	0.0816222	0.955856
64	chr1	11330550	11331049	FALSE	Stable	2.51384	5.17641e-05	2.77334	1.29153e-06	0.120247	0.931335
65	chr1	11354700	11355499	FALSE	Stable	3.06258	1.02561e-06	2.92776	3.37304e-07	-0.0286245	0.985725
66	chr1	11355600	11355999	FALSE	Stable	2.46169	7.30183e-05	2.94682	2.84733e-07	0.28929	0.824233
68	chr1	11624100	11624249	FALSE	Stable	2.45541	7.60398e-05	1.39106	0.0145081	1.03666	0.238374
69	chr1	12031600	12031949	FALSE	Stable	2.10713	0.00065048	3.26427	1.50687e-08	-0.595741	0.619131
70	chr1	12032400	12033399	FALSE	Stable	2.57952	3.33963e-05	3.22283	2.23415e-08	-0.359699	0.781431
71	chr1	12050950	12051049	FALSE	Stable	1.53235	0.0127753	2.03098	0.000361103	-0.519406	0.676939
72	chr1	12051150	12052099	FALSE	Stable	2.98813	1.80276e-06	3.76003	9.76782e-11	-0.423488	0.740655
73	chr1	12052150	12053449	FALSE	Stable	3.37683	8.44034e-08	3.62484	4.10218e-10	-0.193694	0.887239
74	chr1	12397650	12398249	FALSE	Stable	2.68188	1.656e-05	3.4265	3.06429e-09	-0.364884	0.778123
75	chr1	12398300	12398949	FALSE	Stable	3.68084	6.40749e-09	2.37908	3.05348e-05	-0.0159923	0.991081
76	chr1	12509850	12510949	FALSE	Stable	2.98927	1.78773e-06	2.82499	8.24955e-07	0.628318	0.591773
77	chr1	12576950	12577449	FALSE	Stable	2.66529	1.86259e-05	3.33774	7.41196e-09	0.294311	0.821992
79	chr1	12776450	12776849	FALSE	Stable	2.66336	1.88689e-05	2.60612	5.16107e-06	-0.462802	0.716659
80	chr1	12791600	12791749	FALSE	Stable	1.85112	0.0026817	2.19067	0.000120937	-0.360316	0.780922
81	chr1	12836600	12836699	FALSE	Stable	3.32983	1.23609e-07	3.32602	8.30546e-09	0.00380444	0.997947
82	chr1	13196250	13196399	FALSE	Stable	3.73548	3.94922e-09	1.32509	0.0199181	-0.418214	0.744465
83	chr1	13196600	13196899	FALSE	Stable	2.28071	0.000230539	2.95368	2.67152e-07	-0.706181	0.523329
84	chr1	13197550	13197749	FALSE	Stable	1.85331	0.00265223	2.618	4.69238e-06	-0.795832	0.440458
87	chr1	13245900	13246549	FALSE	Stable	3.1693	4.47492e-07	2.23604	8.76148e-05	0.758181	0.473932
88	chr1	13372600	13374649	TRUE	Stable	4.45607	3.9446e-12	4.24794	3.97068e-13	0.441262	0.72991
89	chr1	13426750	13426949	FALSE	Stable	1.77517	0.00397569	2.47963	1.412e-05	0.00258355	0.99862
90	chr1	13589050	13589999	TRUE	Stable	3.5087	2.81641e-08	3.30736	9.92133e-09	0.369311	0.775246
91	chr1	13603600	13603699	FALSE	Stable	3.11604	6.78918e-07	3.25826	1.59363e-08	-0.142216	0.918571
92	chr1	13660100	13660499	FALSE	Stable	3.49563	3.15179e-08	2.0226	0.0003818	0.437354	0.732658
93	chr1	13860300	13860599	FALSE	Stable	2.93507	2.67603e-06	1.7554	0.00203245	0.882606	0.360904
94	chr1	13860750	13861399	FALSE	Stable	3.41995	5.94356e-08	2.63246	4.17454e-06	0.887489	0.356814
95	chr1	13861500	13862199	FALSE	Stable	4.24168	3.45513e-11	2.86153	6.03494e-07	0.757844	0.474135
97	chr1	13935450	13935849	FALSE	Stable	4.05798	2.0188e-10	2.10274	0.000222779	1.34539	0.0795667
102	chr1	14184050	14184199	TRUE	Stable	2.76642	9.16071e-06	1.91646	0.000758935	1.23591	0.121771
103	chr1	14184450	14186299	TRUE	Stable	3.47848	3.65243e-08	2.24772	8.0559e-05	1.01543	0.253126
104	chr1	14186400	14186599	FALSE	Stable	2.76133	9.47291e-06	2.13878	0.000174063	1.0085	0.257801
106	chr1	14305850	14305999	FALSE	Stable	2.0473	0.000918156	1.9195	0.000743868	0.10703	0.939712
107	chr1	14306150	14306399	FALSE	Stable	3.10403	7.45895e-07	1.46239	0.0101589	0.614693	0.603282
108	chr1	14306750	14306899	FALSE	Stable	2.97202	2.0352e-06	1.50596	0.0081117	0.856194	0.38351
109	chr1	14306950	14307149	FALSE	Stable	2.73395	1.15073e-05	1.2467	0.0285665	0.232476	0.861956
110	chr1	14307550	14308899	FALSE	Stable	3.03748	1.24032e-06	2.67289	2.99507e-06	0.119575	0.931762
111	chr1	14309200	14310349	FALSE	Stable	3.50961	2.79383e-08	3.48314	1.74327e-09	0.402486	0.753919
112	chr1	14310500	14310749	FALSE	Stable	2.89896	3.50371e-06	1.87948	0.000956884	0.99179	0.271301
113	chr1	14357350	14357699	TRUE	Stable	1.86837	0.00245383	3.11761	5.98891e-08	0.723699	0.506695
114	chr1	14358000	14358199	TRUE	Stable	2.89445	3.6168e-06	2.75951	1.44912e-06	0.10726	0.939596
116	chr1	14504200	14504299	FALSE	Stable	2.66117	1.91434e-05	1.71101	0.00262838	-0.0767843	0.958362
117	chr1	14505000	14505149	FALSE	Stable	1.33762	0.0296631	2.22727	9.33812e-05	0.406479	0.750944
118	chr1	14511950	14512049	FALSE	Stable	1.2228	0.0467859	1.78613	0.0016918	0.411707	0.747805
119	chr1	14512300	14512649	FALSE	Stable	2.86135	4.62818e-06	2.15614	0.000153914	0.0842853	0.954082
121	chr1	14513050	14513549	FALSE	Stable	3.13713	5.76501e-07	2.29192	5.83165e-05	0.293997	0.822022
123	chr1	14842100	14842299	FALSE	Stable	3.96177	5.03242e-10	1.75899	0.00198982	0.184166	0.893188
124	chr1	15032850	15032999	FALSE	Stable	1.4768	0.0164158	2.62735	4.34507e-06	-1.15055	0.16534
126	chr1	15034400	15034749	FALSE	Stable	1.37549	0.0253728	3.9181	1.74226e-11	-0.399979	0.755452
127	chr1	15286700	15286949	FALSE	Stable	3.88611	1.01013e-09	2.58168	6.30791e-06	0.291998	0.823081
128	chr1	15357200	15357699	FALSE	Stable	1.36003	0.0270452	3.89762	2.17529e-11	-0.564648	0.644636
129	chr1	15358000	15358149	FALSE	Stable	2.64301	2.16161e-05	2.53321	9.24971e-06	0.0890269	0.950854
130	chr1	15358600	15358749	FALSE	Stable	2.28526	0.000224703	2.50449	1.15971e-05	0.166722	0.904821
131	chr1	15358800	15359049	FALSE	Stable	2.77013	8.93284e-06	1.6769	0.00320178	-0.16155	0.907608
134	chr1	15804950	15806499	FALSE	Stable	4.7419	1.91412e-13	3.70534	1.75327e-10	0.364435	0.778416
135	chr1	16059300	16059599	FALSE	Stable	4.272	2.54798e-11	1.25442	0.0275951	0.411955	0.747774
136	chr1	16103600	16105299	TRUE	Stable	4.78222	1.26998e-13	3.99204	7.62844e-12	0.334724	0.795268
137	chr1	16115550	16115799	FALSE	Stable	3.56502	1.74617e-08	1.44304	0.0111946	0.285039	0.826561
140	chr1	16227800	16229049	FALSE	Stable	3.7957	2.29333e-09	2.65113	3.58144e-06	0.607589	0.609281
141	chr1	16241150	16241299	FALSE	Stable	2.60325	2.83996e-05	1.16342	0.0410525	0.829973	0.408777
142	chr1	16248250	16250249	TRUE	Stable	4.16676	7.1332e-11	3.26251	1.52951e-08	0.574619	0.636876
143	chr1	16250300	16250599	FALSE	Stable	2.59163	3.0742e-05	1.75023	0.00209405	0.583829	0.629941
144	chr1	16268550	16268949	FALSE	Stable	2.40033	0.000108358	2.60584	5.17361e-06	-0.240103	0.856406
145	chr1	16519050	16519299	FALSE	Stable	4.06217	1.9342e-10	1.43583	0.0116156	0.284574	0.826855
146	chr1	16519450	16520249	FALSE	Stable	3.98654	3.97976e-10	3.89564	2.22525e-11	0.417364	0.744832
147	chr1	16606750	16606849	FALSE	Stable	2.00047	0.00119495	3.29279	1.14436e-08	-0.730924	0.500275
148	chr1	16607250	16607849	FALSE	Stable	3.42629	5.6323e-08	2.53648	9.01648e-06	-0.314685	0.808179
149	chr1	16607950	16608099	FALSE	Stable	2.52674	4.75556e-05	1.55506	0.00625812	0.9509	0.303769
150	chr1	16618500	16619299	TRUE	Stable	4.1227	1.08624e-10	3.54216	9.57035e-10	0.448596	0.725842
151	chr1	16656050	16657349	FALSE	Stable	3.6333	9.70684e-09	3.5326	1.05285e-09	0.267167	0.837886
152	chr1	16657400	16658049	FALSE	Stable	2.19545	0.000386723	4.4029	6.44729e-14	-0.0719352	0.961228
153	chr1	16665150	16665849	FALSE	Stable	3.75682	3.26511e-09	2.24173	8.40945e-05	0.687926	0.539975
154	chr1	16687950	16688699	FALSE	Stable	3.10944	7.14441e-07	2.6225	4.52209e-06	0.28036	0.828873
155	chr1	16688900	16689099	FALSE	Stable	1.41845	0.0211252	2.84043	7.23242e-07	0.565492	0.643961
156	chr1	16855250	16855449	FALSE	Stable	2.21395	0.000346169	1.54984	0.00643495	-0.362843	0.779249
157	chr1	17154150	17154449	FALSE	Stable	2.57618	3.41635e-05	1.48453	0.00907431	0.40271	0.753732
158	chr1	17154550	17154749	FALSE	Stable	2.90018	3.47053e-06	1.4745	0.00955544	0.657743	0.565968
160	chr1	17237550	17237649	FALSE	Stable	2.62378	2.4748e-05	1.98014	0.000504217	-0.368797	0.775832
161	chr1	17726900	17728149	FALSE	Stable	4.49744	2.56183e-12	3.6933	1.99588e-10	0.0732371	0.960725
162	chr1	18460900	18461049	FALSE	Stable	1.44792	0.0186056	1.77521	0.00180542	-0.0373409	0.981199
164	chr1	18462400	18462499	FALSE	Stable	1.62354	0.0083594	2.03098	0.000361103	-0.428222	0.737805
165	chr1	18463450	18463549	FALSE	Stable	2.15661	0.00048636	1.36597	0.0163821	0.769862	0.463016
166	chr1	18512050	18512549	FALSE	Stable	3.54336	2.10962e-08	1.87368	0.000992031	0.637881	0.583611
170	chr1	20135450	20135749	TRUE	Stable	2.6798	1.67941e-05	1.44433	0.0111219	1.42288	0.0567458
175	chr1	20503250	20503499	FALSE	Stable	3.1011	7.6315e-07	2.40188	2.56071e-05	-0.327733	0.800162
176	chr1	20503550	20503799	FALSE	Stable	2.53614	4.45975e-05	3.13039	5.31955e-08	0.380795	0.768037
177	chr1	20507950	20508049	FALSE	Stable	2.12261	0.000593286	1.44474	0.0111012	0.657094	0.566509
178	chr1	20819300	20819499	FALSE	Stable	3.6975	5.52587e-09	1.30516	0.0218385	0.373723	0.772815
179	chr1	20819650	20820349	FALSE	Stable	3.95305	5.46439e-10	3.84037	4.08364e-11	0.737089	0.493942
180	chr1	20951050	20951349	FALSE	Stable	2.82033	6.2149e-06	2.20797	0.000107167	0.161711	0.907537
181	chr1	20951950	20952249	FALSE	Stable	2.39168	0.000114474	2.9721	2.26608e-07	0.556035	0.65098
184	chr1	21078950	21079049	FALSE	Stable	2.10255	0.000667673	1.94277	0.000641558	-0.450075	0.725408
185	chr1	21079400	21079899	FALSE	Stable	4.08798	1.5095e-10	2.86392	5.90433e-07	0.340664	0.791932
186	chr1	21218600	21218849	FALSE	Stable	2.3141	0.000187219	1.6842	0.00306949	0.230961	0.862855
191	chr1	22249400	22249749	FALSE	Stable	3.0706	9.62149e-07	2.15971	0.000150116	0.556581	0.650562
192	chr1	23256300	23256949	FALSE	Stable	3.5707	1.66463e-08	2.70339	2.32205e-06	0.244175	0.853581
193	chr1	23301450	23301599	FALSE	Stable	3.05865	1.05655e-06	2.60719	5.11848e-06	0.430688	0.736124
194	chr1	23382500	23383149	FALSE	Stable	3.82884	1.70699e-09	2.81295	9.16607e-07	0.71882	0.511553
195	chr1	23383500	23383899	FALSE	Stable	3.53892	2.19042e-08	3.19182	3.00233e-08	0.315957	0.807268
197	chr1	23921850	23922149	FALSE	Stable	3.55144	1.96749e-08	2.44186	1.88723e-05	0.268444	0.836901
198	chr1	24005100	24005599	FALSE	Stable	2.95744	2.27172e-06	2.82193	8.47108e-07	0.387777	0.763467
199	chr1	24099550	24100349	FALSE	Stable	3.98535	4.02972e-10	3.37657	5.03571e-09	0.669704	0.556631
200	chr1	24100450	24100899	FALSE	Stable	2.46343	7.22454e-05	2.61327	4.87423e-06	0.272704	0.83416
201	chr1	24141350	24142199	FALSE	Stable	2.54912	4.1206e-05	3.63871	3.56019e-10	0.461431	0.717858
202	chr1	24142600	24142949	FALSE	Stable	3.20581	3.36579e-07	2.16933	0.000140509	0.539886	0.6634
204	chr1	24195000	24196199	TRUE	Stable	4.79652	1.10654e-13	3.57185	7.06532e-10	-0.0157003	0.991205
205	chr1	24196550	24197099	TRUE	Stable	2.55198	4.03815e-05	3.28786	1.20081e-08	0.32679	0.80065
206	chr1	24225800	24226149	FALSE	Stable	2.82863	5.83992e-06	2.53262	9.29452e-06	0.774286	0.459441
210	chr1	24240600	24240699	FALSE	Stable	1.35247	0.0279044	2.16117	0.000148582	0.166334	0.905197
211	chr1	24240800	24240999	FALSE	Stable	2.76133	9.47291e-06	1.14248	0.0448442	1.0007	0.263714
212	chr1	24310650	24311399	FALSE	Stable	3.60516	1.24118e-08	1.78794	0.00167384	1.36657	0.072894
213	chr1	24397450	24397549	FALSE	Stable	3.40327	6.76785e-08	1.87221	0.0010009	-0.0704598	0.961949
215	chr1	24678650	24679099	FALSE	Stable	3.24269	2.49496e-07	3.34156	7.12949e-09	0.516755	0.678837
216	chr1	25188450	25188649	FALSE	Stable	3.53758	2.20965e-08	1.31899	0.020489	0.617069	0.601492
217	chr1	25189000	25189199	FALSE	Stable	2.59354	3.03571e-05	2.56063	7.4441e-06	0.0121301	0.993313
218	chr1	25606650	25607199	FALSE	Stable	2.23994	0.000295465	3.15069	4.41538e-08	-0.488212	0.697973
219	chr1	28047350	28047599	FALSE	Stable	2.51893	5.00147e-05	2.74495	1.63608e-06	-0.670808	0.555712
221	chr1	28220300	28220549	FALSE	Stable	2.19079	0.000396803	2.47992	1.40891e-05	-0.898986	0.346836
224	chr1	28222400	28222499	FALSE	Stable	2.24888	0.000279555	2.54727	8.27537e-06	-0.298387	0.819813
228	chr1	30536200	30538699	FALSE	Stable	3.14347	5.47667e-07	3.73327	1.30531e-10	-0.759348	0.472658
229	chr1	30539450	30539649	FALSE	Stable	1.88942	0.0021908	2.79599	1.05985e-06	-0.934251	0.317731
232	chr1	30541800	30542099	FALSE	Stable	2.31942	0.000181036	3.12024	5.85791e-08	-0.414865	0.746519
234	chr1	30872750	30874649	TRUE	Stable	4.39381	7.46909e-12	4.0861	2.62928e-12	0.268096	0.837182
235	chr1	30948600	30951199	FALSE	Stable	4.89777	3.78787e-14	5.08723	1.04262e-17	0.263447	0.839747
236	chr1	31058500	31058799	FALSE	Stable	3.02657	1.34939e-06	1.52699	0.00726461	0.46778	0.713303
238	chr1	31142100	31142399	FALSE	Stable	1.44575	0.0187771	3.36056	5.91228e-09	-0.356201	0.783085
239	chr1	31148650	31148799	FALSE	Stable	2.38985	0.000115851	1.48638	0.00898767	0.135524	0.922937
240	chr1	31148850	31149099	FALSE	Stable	2.86368	4.54942e-06	2.94572	2.87533e-07	-0.115256	0.934218
241	chr1	31149150	31149599	TRUE	Stable	2.99315	1.73631e-06	2.38358	2.95144e-05	0.709569	0.519294
242	chr1	31149700	31150649	TRUE	Stable	3.09817	7.80285e-07	3.97083	9.62033e-12	0.0888414	0.950971
243	chr1	31150800	31150899	FALSE	Stable	3.75602	3.28548e-09	1.29381	0.0230163	0.860686	0.380064
244	chr1	32363850	32364449	FALSE	Stable	1.4159	0.0213504	3.74565	1.14403e-10	-1.03362	0.240407
245	chr1	32553650	32553799	FALSE	Stable	1.47095	0.0168468	2.17558	0.000134462	-0.725402	0.505142
248	chr1	32934050	32934399	FALSE	Stable	1.81989	0.00315542	3.23069	2.07432e-08	-1.02485	0.246766
249	chr1	33023450	33023749	FALSE	Stable	3.22733	2.82336e-07	2.99176	1.89694e-07	-1.11454	0.187244
250	chr1	33024000	33024199	FALSE	Stable	3.44771	4.71907e-08	2.26214	7.27156e-05	0.158618	0.909086
251	chr1	33024600	33025049	FALSE	Stable	3.28212	1.8279e-07	2.95368	2.67152e-07	-0.4395	0.73141
252	chr1	33459950	33460199	FALSE	Stable	2.44533	8.10503e-05	2.33343	4.29254e-05	0.0786808	0.957124
253	chr1	33460600	33461099	FALSE	Stable	2.78659	7.93574e-06	4.11574	1.85569e-12	0.224396	0.867726
255	chr1	33464550	33464999	FALSE	Stable	1.86384	0.00250737	3.39769	4.09254e-09	-0.190613	0.889491
256	chr1	33465050	33465249	FALSE	Stable	2.71405	1.32383e-05	2.5489	8.17937e-06	-0.18915	0.890042
257	chr1	33465850	33466449	FALSE	Stable	2.6034	2.83996e-05	2.64274	3.83841e-06	-0.318423	0.805649
259	chr1	33501150	33501299	FALSE	Stable	1.62552	0.00828899	1.18495	0.0374417	1.00196	0.262676
260	chr1	33501700	33502049	FALSE	Stable	1.41905	0.0210831	2.53972	8.7907e-06	-0.669416	0.556685
261	chr1	33502350	33503299	FALSE	Stable	3.08799	8.4273e-07	2.96589	2.39754e-07	-0.138628	0.920933
262	chr1	33503650	33503999	FALSE	Stable	2.65913	1.94116e-05	2.31354	4.97914e-05	-0.174456	0.899413
263	chr1	33504350	33504599	FALSE	Stable	2.27919	0.000232824	2.72258	1.97837e-06	0.263659	0.839654
265	chr1	33669500	33669749	FALSE	Stable	2.38086	0.000122828	1.19188	0.0363511	0.0155812	0.991276
266	chr1	33669800	33670499	FALSE	Stable	4.29041	2.11869e-11	2.97568	2.19525e-07	0.278082	0.830659
267	chr1	33719850	33720699	TRUE	Stable	3.41859	6.01623e-08	3.24768	1.75903e-08	0.379766	0.768514
268	chr1	33757400	33758049	FALSE	Stable	3.3432	1.10897e-07	2.27153	6.78587e-05	0.244504	0.853314
269	chr1	33813750	33814549	FALSE	Stable	4.53646	1.70035e-12	3.92156	1.67492e-11	0.675815	0.550618
270	chr1	33814700	33814849	FALSE	Stable	2.36704	0.000134228	1.72074	0.00248459	0.613087	0.604535
271	chr1	34005250	34006449	FALSE	Stable	3.38129	8.12333e-08	3.52637	1.1232e-09	0.09628	0.94618
275	chr1	34103350	34103649	FALSE	Stable	3.05913	1.0536e-06	1.55622	0.00622377	0.734973	0.496225
276	chr1	34133300	34133499	FALSE	Stable	3.23464	2.66503e-07	1.42352	0.0123618	0.209603	0.877212
278	chr1	34408250	34408549	FALSE	Stable	1.24298	0.0432711	2.6567	3.4184e-06	-0.222203	0.869412
279	chr1	34432950	34433349	FALSE	Stable	2.63462	2.29527e-05	2.79816	1.04022e-06	0.216212	0.873328
280	chr1	34434850	34435799	FALSE	Stable	3.46417	4.11109e-08	3.93787	1.39809e-11	0.395894	0.758636
281	chr1	34439400	34439699	FALSE	Stable	1.5239	0.013276	2.4646	1.58572e-05	0.191739	0.888354
283	chr1	34841800	34843849	TRUE	Stable	4.90892	3.37214e-14	4.29045	2.44216e-13	0.164878	0.905906
285	chr1	35667600	35668399	FALSE	Stable	2.4894	6.09565e-05	2.94351	2.93128e-07	0.0241638	0.987437
286	chr1	35668800	35669199	FALSE	Stable	1.87492	0.00236963	4.38769	7.76334e-14	-0.0809745	0.955992
287	chr1	35875150	35875349	FALSE	Stable	2.25297	0.000272612	2.7177	2.05973e-06	0.0966748	0.945915
288	chr1	35935200	35935649	FALSE	Stable	2.30772	0.000194622	2.76891	1.34254e-06	-0.718766	0.511599
289	chr1	35935700	35935799	FALSE	Stable	1.77185	0.00404489	1.74776	0.00212469	0.410045	0.749172
290	chr1	35954100	35954299	FALSE	Stable	3.12089	6.53838e-07	1.94277	0.000641558	0.568267	0.641876
291	chr1	35973650	35973749	FALSE	Stable	1.58683	0.00994386	3.57307	6.97346e-10	0.00123623	0.999188
292	chr1	35973900	35973999	FALSE	Stable	2.91353	3.15e-06	1.39513	0.0142233	0.908547	0.338998
293	chr1	35977850	35977999	FALSE	Stable	2.91332	3.15337e-06	3.25101	1.70775e-08	-0.337694	0.7933
294	chr1	35978100	35978199	FALSE	Stable	1.63178	0.00805383	1.24133	0.0292445	0.951839	0.302994
296	chr1	35986250	35986399	FALSE	Stable	1.70875	0.00553926	2.28282	6.2313e-05	-0.928377	0.322328
297	chr1	35991800	35991899	FALSE	Stable	1.53235	0.0127753	3.62627	4.03942e-10	-1.10226	0.194609
298	chr1	35992250	35992749	FALSE	Stable	3.52877	2.37264e-08	2.24136	8.43265e-05	-0.0117098	0.993598
299	chr1	35993100	35993249	FALSE	Stable	1.58096	0.0102266	2.87983	5.13777e-07	-0.737475	0.49358
300	chr1	36015700	36015799	FALSE	Stable	1.33124	0.0304344	1.94412	0.000636337	-0.640565	0.581208
301	chr1	36016600	36018399	FALSE	Stable	3.67158	6.96473e-09	3.23256	2.03698e-08	0.68917	0.538946
303	chr1	36243700	36244199	FALSE	Stable	3.62726	1.02452e-08	2.06707	0.000284074	0.937885	0.314242
305	chr1	36368850	36369199	TRUE	Stable	2.19727	0.000382324	4.3528	1.17199e-13	0.138915	0.920759
306	chr1	36444750	36445199	FALSE	Stable	3.60265	1.2689e-08	2.54062	8.72558e-06	0.348897	0.787618
307	chr1	36471300	36471449	FALSE	Stable	1.25728	0.0409049	3.61963	4.32758e-10	-0.053786	0.972032
309	chr1	36511800	36512199	TRUE	Stable	3.25153	2.33419e-07	3.49188	1.59928e-09	0.210902	0.876325
310	chr1	36547600	36547849	FALSE	Stable	3.1418	5.54988e-07	1.93731	0.000664131	0.321099	0.804238
311	chr1	36548350	36548599	FALSE	Stable	2.824	6.0484e-06	2.3616	3.48085e-05	0.429193	0.7371
312	chr1	36555800	36558399	TRUE	Stable	4.8058	9.95433e-14	4.86129	2.1211e-16	0.302418	0.816462
315	chr1	36575950	36576099	FALSE	Stable	2.62975	2.37468e-05	2.1118	0.000209431	0.490263	0.697082
316	chr1	36580350	36581149	FALSE	Stable	2.46273	7.25837e-05	2.65078	3.59179e-06	0.0533144	0.972516
317	chr1	36584850	36584949	FALSE	Stable	2.6152	2.61718e-05	1.15124	0.0432352	0.451519	0.72396
318	chr1	36586000	36586399	FALSE	Stable	3.2669	2.06061e-07	2.41992	2.23201e-05	0.640398	0.581384
319	chr1	36586850	36587199	FALSE	Stable	3.1337	5.93287e-07	2.07966	0.000260829	0.435884	0.733544
320	chr1	36588600	36588799	TRUE	Stable	2.56643	3.64971e-05	2.16374	0.00014608	0.369479	0.775135
321	chr1	36588850	36589199	TRUE	Stable	2.56474	3.69375e-05	3.18593	3.16808e-08	-0.0717546	0.961354
322	chr1	36589400	36589699	FALSE	Stable	3.57866	1.55523e-08	2.26005	7.37983e-05	0.86796	0.373701
324	chr1	36673500	36673599	FALSE	Stable	3.32983	1.23609e-07	1.20984	0.0336078	1.10755	0.191387
325	chr1	36691150	36691349	TRUE	Stable	2.91353	3.15e-06	1.78501	0.00170339	-0.485445	0.700562
326	chr1	36691650	36691999	TRUE	Stable	2.66308	1.89043e-05	2.19224	0.000119611	0.433485	0.734571
327	chr1	36709400	36709999	TRUE	Stable	4.03945	2.41354e-10	3.20552	2.63895e-08	0.381321	0.767655
328	chr1	36723250	36723999	TRUE	Stable	3.00432	1.59473e-06	2.77136	1.31433e-06	0.0875977	0.95192
329	chr1	36724050	36724749	TRUE	Stable	3.97621	4.38525e-10	2.39561	2.68751e-05	0.350393	0.786455
331	chr1	36860250	36860749	FALSE	Stable	2.99043	1.77249e-06	2.15377	0.000156568	-0.074269	0.960026
332	chr1	36861150	36861499	FALSE	Stable	2.4156	9.8376e-05	2.56237	7.348e-06	0.0100016	0.99448
333	chr1	36861950	36862199	FALSE	Stable	3.06518	1.00437e-06	2.211	0.000104793	0.0862367	0.952854
335	chr1	36938200	36938349	TRUE	Stable	3.43503	5.23642e-08	1.12399	0.0484886	0.697068	0.53106
336	chr1	36938600	36940299	FALSE	Stable	4.55719	1.37373e-12	4.22617	5.1673e-13	0.468121	0.713303
337	chr1	37028850	37029049	FALSE	Stable	1.77292	0.00402322	2.32544	4.56097e-05	-9.61779e-05	0.999854
338	chr1	37045200	37045299	FALSE	Stable	2.33805	0.000160869	3.06872	9.44009e-08	-0.169266	0.902737
339	chr1	37045350	37045499	FALSE	Stable	1.99833	0.00120961	1.3665	0.0163424	0.334762	0.795268
340	chr1	37045850	37046399	FALSE	Stable	2.34121	0.000157968	3.21129	2.50223e-08	0.232379	0.861983
341	chr1	37053700	37053849	FALSE	Stable	2.29892	0.000205921	2.0571	0.000304065	-0.770616	0.462736
342	chr1	37098100	37098249	FALSE	Stable	1.89023	0.00218227	2.10274	0.000222779	0.757011	0.475136
345	chr1	37122550	37123649	FALSE	Stable	3.84296	1.50289e-09	1.806	0.00150345	1.41465	0.0589072
347	chr1	37429950	37430099	TRUE	Stable	3.00951	1.53293e-06	1.93573	0.000670923	0.305844	0.813909
348	chr1	37430200	37430499	TRUE	Stable	3.0037	1.6021e-06	2.38285	2.96768e-05	0.261996	0.840778
350	chr1	37697700	37698049	FALSE	Stable	2.958	2.26119e-06	2.79372	1.08037e-06	0.393546	0.759799
351	chr1	37698650	37699499	FALSE	Stable	3.26955	2.02433e-07	2.16687	0.000142926	0.676908	0.549664
352	chr1	37864600	37864899	TRUE	Stable	2.13415	0.000557053	1.2389	0.0295576	0.272945	0.834038
353	chr1	37872400	37872649	FALSE	Stable	3.15531	4.99826e-07	1.18303	0.0377454	0.524417	0.674244
354	chr1	37872700	37873099	FALSE	Stable	2.43987	8.40412e-05	3.70602	1.73939e-10	0.514441	0.680835
355	chr1	37889900	37890099	FALSE	Stable	3.84509	1.47604e-09	1.92894	0.000701163	0.31463	0.808179
356	chr1	37996550	37997349	TRUE	Stable	4.38203	8.40787e-12	3.41047	3.60138e-09	0.348423	0.787902
357	chr1	37997450	37997899	TRUE	Stable	3.22802	2.80775e-07	2.88426	4.95149e-07	0.628956	0.591528
358	chr1	37998050	37998699	FALSE	Stable	3.45409	4.47265e-08	3.13434	5.12824e-08	0.453123	0.722953
359	chr1	38129000	38129749	TRUE	Stable	3.22277	2.933e-07	3.8956	2.22573e-11	0.406552	0.750871
360	chr1	38129900	38130399	TRUE	Stable	2.41635	9.79967e-05	2.99824	1.79407e-07	0.25671	0.844197
361	chr1	38216600	38216849	FALSE	Stable	3.42181	5.85309e-08	2.82832	8.04108e-07	0.565805	0.64362
362	chr1	38217000	38217749	FALSE	Stable	3.20921	3.2734e-07	3.59347	5.6651e-10	0.259339	0.842315
363	chr1	38217800	38218599	FALSE	Stable	3.24454	2.46156e-07	2.22919	9.21019e-05	0.211448	0.876108
365	chr1	38268100	38268249	FALSE	Stable	2.41262	0.000100004	2.46856	1.53808e-05	-1.06839	0.215874
368	chr1	38394650	38394749	FALSE	Stable	2.33429	0.000164782	2.80042	1.02062e-06	0.508906	0.684018
369	chr1	38394800	38395299	FALSE	Stable	3.88912	9.85112e-10	1.98318	0.000495422	0.546964	0.658501
370	chr1	38395600	38396099	FALSE	Stable	3.71494	4.74978e-09	1.95126	0.00060767	0.72946	0.501863
371	chr1	38399500	38399649	FALSE	Stable	2.4716	6.83476e-05	2.52638	9.74053e-06	-0.0755594	0.958965
372	chr1	38417250	38417399	FALSE	Stable	3.01272	1.49462e-06	2.47833	1.42572e-05	0.513617	0.681203
373	chr1	38417700	38418199	FALSE	Stable	3.26012	2.17668e-07	2.29182	5.8356e-05	0.255169	0.845107
374	chr1	38435600	38436749	FALSE	Stable	3.587	1.45209e-08	2.88182	5.0593e-07	0.74853	0.48328
375	chr1	38436900	38437299	FALSE	Stable	2.67797	1.7008e-05	1.96166	0.00056898	1.09398	0.199891
376	chr1	38437350	38437849	FALSE	Stable	2.31696	0.000183944	2.71385	2.1282e-06	0.665786	0.55921
377	chr1	38438500	38439899	FALSE	Stable	3.21863	3.03098e-07	2.12865	0.000186823	0.635127	0.58582
378	chr1	38440050	38440149	FALSE	Stable	1.71874	0.00527363	1.83776	0.00124048	0.266932	0.837966
380	chr1	38496400	38497499	FALSE	Stable	3.72008	4.53292e-09	2.3077	5.19886e-05	1.2373	0.121122
381	chr1	38497600	38498349	FALSE	Stable	3.14248	5.52267e-07	3.2198	2.30022e-08	0.76128	0.47105
382	chr1	38498950	38499049	FALSE	Stable	2.65637	1.97396e-05	2.32525	4.56644e-05	1.32278	0.0877879
384	chr1	38508500	38514249	TRUE	Stable	4.55849	1.3587e-12	4.09876	2.26772e-12	0.215586	0.873728
385	chr1	38514450	38514699	FALSE	Stable	1.87748	0.00233742	3.58132	6.39367e-10	0.727966	0.503201
389	chr1	38604800	38604899	FALSE	Stable	3.19935	3.52526e-07	1.39349	0.0143374	0.793426	0.442381
390	chr1	38605950	38607899	TRUE	Stable	4.12335	1.08072e-10	3.75423	1.04239e-10	-0.0226017	0.988054
391	chr1	38607950	38608499	FALSE	Stable	4.65593	4.95436e-13	1.70278	0.00275793	-0.0784179	0.95723
392	chr1	38626200	38627449	FALSE	Stable	4.48067	3.05155e-12	4.22772	5.07643e-13	0.283874	0.827033
393	chr1	38627550	38629949	FALSE	Stable	5.16172	2.11179e-15	4.25422	3.70923e-13	0.183452	0.893823
394	chr1	38630000	38630299	FALSE	Stable	4.14091	9.05206e-11	2.39423	2.71721e-05	0.71972	0.510673
395	chr1	38630550	38633049	TRUE	Stable	4.23898	3.54448e-11	3.73013	1.34757e-10	0.235638	0.859802
396	chr1	38633150	38633849	FALSE	Stable	2.98657	1.82309e-06	2.42982	2.07412e-05	0.357079	0.782728
397	chr1	38634050	38634199	FALSE	Stable	1.83329	0.0029449	1.32121	0.0202797	0.254508	0.845788
398	chr1	38634300	38634449	FALSE	Stable	1.84687	0.00274401	4.25184	3.81724e-13	-0.0964125	0.946057
399	chr1	38634500	38634599	FALSE	Stable	2.45143	7.79389e-05	1.33041	0.0194047	0.511158	0.682709
400	chr1	38635100	38635499	FALSE	Stable	2.26761	0.000249846	3.04794	1.14136e-07	0.0329661	0.98374
401	chr1	38636500	38636899	FALSE	Stable	4.23988	3.51178e-11	3.03743	1.25664e-07	-0.0523247	0.973168
402	chr1	38637150	38637249	FALSE	Stable	2.60325	2.83996e-05	1.18495	0.0374417	1.39753	0.0632906
403	chr1	38642350	38642699	FALSE	Stable	2.1874	0.000405193	2.12126	0.000196156	0.392594	0.760322
404	chr1	38642900	38643199	FALSE	Stable	4.11219	1.19963e-10	1.30069	0.0223045	0.611205	0.606551
405	chr1	38652700	38652849	FALSE	Stable	2.15291	0.000497095	2.20609	0.000108531	-0.080866	0.956037
406	chr1	38658300	38658749	FALSE	Stable	2.06047	0.000852357	3.10971	6.46152e-08	-0.235954	0.859542
407	chr1	38658800	38659549	FALSE	Stable	3.32695	1.26544e-07	3.22058	2.28413e-08	-0.390222	0.762038
408	chr1	38659850	38660099	FALSE	Stable	1.73474	0.00486648	2.65461	3.47946e-06	-0.304244	0.815009
409	chr1	38660150	38661499	FALSE	Stable	3.29005	1.71286e-07	3.66296	2.7599e-10	-0.292367	0.822919
410	chr1	38661550	38661649	FALSE	Stable	1.59773	0.0094474	1.54888	0.00646749	-0.56931	0.641005
411	chr1	38661750	38662399	FALSE	Stable	2.33049	0.000168789	3.29832	1.08433e-08	-0.266576	0.837966
412	chr1	38688550	38688649	FALSE	Stable	2.12261	0.000593286	2.42051	2.22191e-05	-0.318678	0.805509
413	chr1	38700550	38700799	FALSE	Stable	3.89859	8.99027e-10	1.12134	0.0490035	0.758632	0.473457
418	chr1	38759900	38760549	TRUE	Stable	3.55526	1.90282e-08	2.74293	1.66484e-06	1.35878	0.0753817
419	chr1	38760800	38761549	TRUE	Stable	3.45929	4.27642e-08	2.68487	2.71251e-06	1.23847	0.120713
421	chr1	38764500	38764799	FALSE	Stable	1.9675	0.00143882	3.0271	1.37858e-07	0.493949	0.694479
423	chr1	38765300	38765499	FALSE	Stable	2.57613	3.4169e-05	2.88519	4.90972e-07	0.987073	0.275343
425	chr1	38766200	38767899	FALSE	Stable	3.72943	4.16586e-09	3.50699	1.37044e-09	0.556737	0.650439
427	chr1	38770400	38770699	FALSE	Stable	2.54791	4.15368e-05	2.84849	6.76111e-07	0.995548	0.267916
428	chr1	38893350	38893449	FALSE	Stable	2.7746	8.64833e-06	1.44474	0.0111012	0.317426	0.806471
429	chr1	38986850	38987599	FALSE	Stable	3.55302	1.94004e-08	4.39025	7.57153e-14	-0.237359	0.858675
430	chr1	38987750	38988399	FALSE	Stable	3.05031	1.13091e-06	4.05412	3.811e-12	-0.147406	0.915101
431	chr1	39106200	39106349	FALSE	Stable	1.60744	0.00902206	1.7379	0.00224999	0.844581	0.395725
433	chr1	39367400	39367649	FALSE	Stable	2.48533	6.26405e-05	2.27658	6.5274e-05	0.438011	0.73246
434	chr1	39367750	39369149	FALSE	Stable	4.2499	3.18518e-11	3.93919	1.37814e-11	0.546876	0.658501
436	chr1	39535750	39536199	TRUE	Stable	3.77071	2.88434e-09	2.7438	1.65248e-06	0.530315	0.670445
437	chr1	39576600	39577399	TRUE	Stable	3.74327	3.68312e-09	3.52833	1.10013e-09	0.283455	0.827033
439	chr1	39578650	39578799	FALSE	Stable	2.34013	0.000158921	2.59606	5.60436e-06	-0.276707	0.831596
440	chr1	39579200	39579349	FALSE	Stable	1.83943	0.00285225	3.56845	7.29598e-10	-0.737362	0.493781
443	chr1	39714750	39715099	FALSE	Stable	2.63252	2.33015e-05	1.45283	0.010656	0.338556	0.792859
445	chr1	39717150	39717249	FALSE	Stable	3.44028	5.01042e-08	1.30039	0.022329	-0.201891	0.88153
446	chr1	39717500	39717649	FALSE	Stable	1.74801	0.00454789	3.43928	2.71069e-09	0.296201	0.821036
447	chr1	39719750	39719849	FALSE	Stable	3.76549	3.02607e-09	2.01732	0.000395058	0.146651	0.915639
448	chr1	39720150	39721049	FALSE	Stable	4.11667	1.14947e-10	3.00235	1.73092e-07	-0.300429	0.818058
449	chr1	39734800	39734999	FALSE	Stable	1.78053	0.00386604	1.20086	0.0349391	0.22537	0.867266
451	chr1	39868250	39868499	FALSE	Stable	3.30259	1.54759e-07	1.6148	0.00451907	1.06963	0.215134
453	chr1	39869300	39869449	FALSE	Stable	1.25964	0.0405602	3.06551	9.71657e-08	0.502698	0.688622
454	chr1	39869750	39869849	FALSE	Stable	1.90091	0.00205881	1.7379	0.00224999	0.724414	0.505893
455	chr1	39900250	39900899	TRUE	Stable	4.65263	5.1385e-13	4.09007	2.51426e-12	0.525665	0.673649
456	chr1	39901050	39902549	TRUE	Stable	4.84018	6.93521e-14	3.52786	1.10561e-09	0.436502	0.733169
458	chr1	39969700	39969849	FALSE	Stable	2.4208	9.51711e-05	1.89501	0.000867737	0.505007	0.687064
459	chr1	40242700	40243449	FALSE	Stable	2.22477	0.000324047	1.91333	0.000774239	0.104859	0.940817
461	chr1	40266850	40266949	FALSE	Stable	3.02083	1.40775e-06	3.18618	3.16062e-08	-0.165355	0.905546
462	chr1	40352050	40352349	FALSE	Stable	2.74854	1.03791e-05	2.74563	1.62801e-06	-0.517143	0.678588
463	chr1	40352450	40352949	FALSE	Stable	2.72744	1.20427e-05	3.34296	7.03027e-09	-0.363245	0.779208
464	chr1	40353250	40353899	FALSE	Stable	3.17117	4.40774e-07	3.55733	8.21468e-10	-0.424474	0.740111
465	chr1	40436150	40436899	FALSE	Stable	2.68563	1.61294e-05	2.84791	6.78994e-07	-0.523418	0.674645
466	chr1	40915250	40915349	FALSE	Stable	1.85658	0.00260687	3.481	1.77814e-09	0.363048	0.779208
471	chr1	41034800	41035799	FALSE	Stable	3.25174	2.33027e-07	3.17472	3.52578e-08	-0.0445777	0.976525
472	chr1	41035850	41036299	FALSE	Stable	2.52169	4.91209e-05	2.29161	5.8453e-05	0.0409074	0.978824
473	chr1	41271150	41271399	FALSE	Stable	3.43255	5.34211e-08	2.67429	2.95993e-06	0.73749	0.49358
474	chr1	41271550	41272299	FALSE	Stable	3.4446	4.84312e-08	3.05364	1.08325e-07	0.354068	0.784042
475	chr1	41272600	41272749	FALSE	Stable	2.26814	0.000249001	1.16404	0.0409691	0.485948	0.69998
476	chr1	41273200	41273749	FALSE	Stable	2.74831	1.03962e-05	2.69281	2.53377e-06	0.43525	0.733972
477	chr1	41274600	41274699	FALSE	Stable	3.18487	3.95495e-07	2.47833	1.42572e-05	-0.305897	0.813909
478	chr1	41274750	41274899	FALSE	Stable	1.52909	0.0129666	2.66018	3.32404e-06	-0.161578	0.907608
479	chr1	41274950	41275199	FALSE	Stable	3.53139	2.31674e-08	1.26768	0.0259596	0.645582	0.576492
480	chr1	41275300	41275799	FALSE	Stable	4.54252	1.59535e-12	2.60809	5.08722e-06	0.584316	0.629416
481	chr1	41276950	41277199	FALSE	Stable	2.88744	3.81707e-06	2.08298	0.000254919	0.776773	0.457408
482	chr1	41326250	41326349	FALSE	Stable	2.19079	0.000396803	1.7264	0.0024058	0.443617	0.728473
483	chr1	41326600	41326799	FALSE	Stable	3.67961	6.47419e-09	2.0392	0.000342124	0.038888	0.980265
484	chr1	41358350	41359099	FALSE	Stable	3.12984	6.11629e-07	3.22749	2.14101e-08	0.154622	0.911228
485	chr1	41389100	41389299	FALSE	Stable	1.53652	0.0125331	2.40811	2.44306e-05	-0.164547	0.906111
486	chr1	41389850	41390099	FALSE	Stable	1.83207	0.00296182	2.44985	1.77523e-05	0.351729	0.785644
487	chr1	41390600	41390999	FALSE	Stable	2.35827	0.000141637	2.14084	0.000171587	0.0108368	0.993955
488	chr1	41610450	41610749	FALSE	Stable	2.40813	0.000102956	2.96249	2.47048e-07	-0.264414	0.839161
489	chr1	41611350	41611799	FALSE	Stable	3.18991	3.80094e-07	1.38096	0.015238	0.287141	0.825393
491	chr1	41651650	41652099	FALSE	Stable	2.81464	6.47227e-06	2.26357	7.20196e-05	0.361904	0.779961
493	chr1	41652650	41652849	FALSE	Stable	2.86185	4.61002e-06	3.48299	1.74544e-09	0.353898	0.78423
494	chr1	41653050	41653449	FALSE	Stable	4.10759	1.25211e-10	2.85771	6.24593e-07	0.222933	0.868915
498	chr1	42233450	42233949	FALSE	Stable	3.43026	5.44456e-08	1.79431	0.00161253	0.431465	0.735826
501	chr1	42235600	42236449	FALSE	Stable	3.28296	1.8158e-07	1.68198	0.00311025	0.5624	0.646217
502	chr1	42259850	42259999	FALSE	Stable	2.01137	0.00112408	1.62058	0.00437973	0.952181	0.30275
503	chr1	42261750	42262149	FALSE	Stable	2.62507	2.45383e-05	2.13544	0.000178203	0.130774	0.925334
504	chr1	42524400	42524549	FALSE	Stable	2.66105	1.91434e-05	2.84178	7.15595e-07	-0.201506	0.881825
505	chr1	42539000	42539349	FALSE	Stable	3.35846	9.85024e-08	2.26602	7.0716e-05	0.209046	0.877534
506	chr1	42539500	42540299	FALSE	Stable	3.8851	1.01985e-09	3.29009	1.17531e-08	-0.121328	0.930692
507	chr1	42540450	42541399	FALSE	Stable	3.64972	8.43458e-09	3.46188	2.15471e-09	0.248756	0.850192
508	chr1	42771800	42771899	FALSE	Stable	2.55971	3.82274e-05	1.17236	0.0395379	0.132573	0.924494
509	chr1	42851300	42851899	FALSE	Stable	3.24706	2.41616e-07	2.63141	4.21063e-06	0.470291	0.711656
510	chr1	42911050	42911299	FALSE	Stable	2.89445	3.6168e-06	1.18182	0.0379394	0.685675	0.542384
511	chr1	42953150	42953449	TRUE	Stable	2.25312	0.000272461	2.21485	0.000102031	0.267532	0.837665
512	chr1	43005550	43006099	FALSE	Stable	1.36063	0.0269777	3.89659	2.19995e-11	-0.322483	0.803331
513	chr1	43006300	43006799	FALSE	Stable	2.7206	1.26466e-05	2.57498	6.65641e-06	-0.475295	0.708327
514	chr1	43009800	43009999	FALSE	Stable	1.28757	0.0363781	2.52728	9.68181e-06	-1.01045	0.256575
515	chr1	43010400	43011099	FALSE	Stable	2.11736	0.000612057	3.16095	4.00999e-08	-0.791318	0.444299
516	chr1	43011250	43011499	FALSE	Stable	1.67191	0.00664021	3.00678	1.66492e-07	-0.948919	0.305346
517	chr1	43044900	43045649	FALSE	Stable	3.08271	8.76244e-07	3.77712	8.13103e-11	-0.410806	0.748692
518	chr1	43045900	43046799	FALSE	Stable	2.24957	0.000278524	3.36825	5.48096e-09	-0.835075	0.403837
519	chr1	43097900	43099499	TRUE	Stable	4.5241	1.93339e-12	3.55566	8.36299e-10	0.233325	0.861266
520	chr1	43164400	43164499	FALSE	Stable	1.86673	0.00246978	2.00698	0.000423439	-0.750109	0.481717
521	chr1	43189050	43189149	FALSE	Stable	3.0618	1.03185e-06	2.92682	3.39878e-07	0.696378	0.531677
523	chr1	43225400	43225549	FALSE	Stable	1.51215	0.0139993	2.50749	1.13293e-05	-1.02303	0.247925
524	chr1	43311100	43311199	FALSE	Stable	2.4564	7.5582e-05	2.70088	2.37217e-06	0.316913	0.806887
525	chr1	43311300	43311549	FALSE	Stable	2.2398	0.0002957	2.26787	6.97728e-05	-0.0636496	0.965601
526	chr1	43398300	43398499	FALSE	Stable	2.99776	1.67408e-06	1.93344	0.000681033	0.0373713	0.981183
527	chr1	43398550	43398999	FALSE	Stable	2.2894	0.000218872	4.19889	7.07196e-13	0.522304	0.675246
528	chr1	43399600	43399899	FALSE	Stable	2.90782	3.28388e-06	2.36087	3.50006e-05	-0.0711978	0.961701
529	chr1	43400000	43400349	FALSE	Stable	3.26063	2.16768e-07	2.93758	3.09507e-07	-0.0312556	0.984562
530	chr1	43401100	43401499	FALSE	Stable	3.06736	9.87204e-07	2.54918	8.16201e-06	-0.255023	0.845155
532	chr1	43444600	43446949	TRUE	Stable	4.42925	5.17657e-12	3.65286	3.07386e-10	0.628993	0.591497
533	chr1	43591350	43591449	FALSE	Stable	3.3552	1.01059e-07	2.63302	4.15533e-06	0.722178	0.508485
535	chr1	43827100	43827749	TRUE	Stable	3.39811	7.08053e-08	2.5871	6.04132e-06	0.772963	0.460271
536	chr1	43933050	43934749	FALSE	Stable	3.83921	1.55375e-09	4.02098	5.51498e-12	0.456563	0.720429
538	chr1	44101850	44102449	TRUE	Stable	3.88485	1.022e-09	2.59059	5.87014e-06	0.449266	0.725585
539	chr1	44102500	44103099	TRUE	Stable	3.36245	9.54039e-08	2.93909	3.0528e-07	0.610765	0.607076
540	chr1	44117750	44118049	FALSE	Stable	2.79726	7.33146e-06	2.00012	0.000443174	0.352358	0.785264
541	chr1	44118250	44118849	FALSE	Stable	2.38248	0.000121528	2.108	0.000215084	0.787931	0.447242
542	chr1	44118900	44120199	FALSE	Stable	3.31106	1.44494e-07	3.45773	2.25103e-09	0.201742	0.881685
543	chr1	44147150	44148599	TRUE	Stable	3.08616	8.54831e-07	3.15339	4.3031e-08	0.477622	0.706757
544	chr1	44394950	44395499	FALSE	Stable	4.08377	1.57175e-10	2.54209	8.62765e-06	0.773743	0.459919
546	chr1	44551100	44554199	TRUE	Stable	4.46062	3.75383e-12	3.98159	8.56166e-12	0.478202	0.706362
548	chr1	44613550	44613649	FALSE	Stable	2.2588	0.000263869	1.28537	0.0239306	0.952654	0.30265
549	chr1	44618100	44618299	FALSE	Stable	2.30838	0.000193777	1.27235	0.0253926	0.738962	0.492477
550	chr1	44618550	44619649	FALSE	Stable	3.19701	3.5904e-07	2.96948	2.32308e-07	0.411676	0.747847
551	chr1	44674400	44674549	FALSE	Stable	2.97458	1.99461e-06	1.20939	0.0336562	0.163675	0.906338
552	chr1	44677550	44677699	FALSE	Stable	2.98285	1.87598e-06	1.22277	0.0317593	0.505312	0.686775
553	chr1	44677850	44680849	TRUE	Stable	4.49671	2.57921e-12	4.32455	1.63649e-13	0.131699	0.92499
554	chr1	44680950	44681349	FALSE	Stable	3.13155	6.03942e-07	2.53866	8.8674e-06	-0.0252644	0.986917
558	chr1	44720800	44720999	FALSE	Stable	3.076	9.24412e-07	2.71807	2.05359e-06	0.743882	0.488056
559	chr1	44721250	44722299	FALSE	Stable	3.9523	5.50337e-10	2.7335	1.80284e-06	0.307869	0.812531
561	chr1	44746050	44746749	FALSE	Stable	3.34672	1.08234e-07	2.95101	2.73672e-07	-0.31742	0.806471
562	chr1	44747750	44747899	FALSE	Stable	1.62882	0.00816599	3.12837	5.42043e-08	-0.507881	0.684841
563	chr1	44750700	44750849	FALSE	Stable	1.81354	0.00326059	1.75833	0.00199736	0.345156	0.789289
564	chr1	44751100	44751199	FALSE	Stable	2.66398	1.87884e-05	1.1694	0.0400404	0.467625	0.713468
565	chr1	44751450	44752449	FALSE	Stable	2.71726	1.2957e-05	3.50816	1.35286e-09	0.17128	0.901416
566	chr1	44824800	44825049	FALSE	Stable	3.61114	1.17881e-08	1.12134	0.0490035	0.471183	0.710815
568	chr1	44848250	44848449	FALSE	Stable	2.50618	5.45348e-05	2.20609	0.000108531	0.272401	0.834358
569	chr1	44848800	44849399	FALSE	Stable	3.9149	7.77994e-10	2.61063	4.9817e-06	1.27313	0.106344
570	chr1	44849650	44851199	FALSE	Stable	4.50971	2.24974e-12	2.86107	6.06115e-07	0.523233	0.674754
571	chr1	44877500	44877699	FALSE	Stable	2.35648	0.000143264	2.19008	0.000121451	0.456351	0.720656
572	chr1	44877950	44879649	TRUE	Stable	4.88305	4.44786e-14	3.48824	1.65595e-09	1.27321	0.106321
574	chr1	44891350	44891599	FALSE	Stable	3.68096	6.40156e-09	1.34071	0.0184958	-0.00152164	0.999004
575	chr1	44891650	44892299	FALSE	Stable	2.96483	2.15181e-06	3.51209	1.29799e-09	0.00516391	0.997201
576	chr1	44892800	44893149	FALSE	Stable	1.6472	0.00747349	2.32307	4.64012e-05	-0.289917	0.823676
578	chr1	44940050	44940349	FALSE	Stable	2.7328	1.15879e-05	2.40413	2.51656e-05	-0.698278	0.529902
579	chr1	44940550	44940749	FALSE	Stable	3.10846	7.1972e-07	2.06552	0.000287194	0.0159863	0.991081
580	chr1	44941000	44941549	FALSE	Stable	2.24923	0.000279115	3.28234	1.26898e-08	-0.326073	0.800984
581	chr1	45020950	45021299	FALSE	Stable	2.66883	1.81686e-05	2.15626	0.000153789	0.48488	0.700958
582	chr1	45031250	45031349	FALSE	Stable	1.6614	0.00698198	2.99193	1.89386e-07	0.65694	0.566654
583	chr1	45032000	45032299	FALSE	Stable	3.9049	8.5062e-10	1.33497	0.0190069	0.968406	0.289301
584	chr1	45113700	45113899	FALSE	Stable	2.00274	0.0011802	1.64446	0.00383444	-0.259876	0.842001
585	chr1	45114050	45114299	FALSE	Stable	3.28108	1.84312e-07	2.19419	0.000118019	0.0599312	0.968456
586	chr1	45114500	45114749	FALSE	Stable	2.86343	4.55378e-06	4.21508	5.85967e-13	-0.35999	0.781168
587	chr1	45115250	45115349	FALSE	Stable	2.12438	0.000588631	2.22727	9.33812e-05	-0.123668	0.929573
588	chr1	45115650	45118299	FALSE	Stable	3.88713	1.0023e-09	4.25832	3.54287e-13	-0.0766136	0.958415
589	chr1	45118550	45118699	FALSE	Stable	2.501	5.64216e-05	3.7403	1.21001e-10	0.33453	0.795416
591	chr1	45288300	45288799	FALSE	Stable	4.51217	2.18839e-12	1.50027	0.00835996	0.981877	0.279236
592	chr1	45310750	45311099	FALSE	Stable	2.77666	8.52372e-06	2.78806	1.13427e-06	0.374546	0.772264
593	chr1	45311200	45313049	FALSE	Stable	4.81423	9.14519e-14	5.11017	7.7281e-18	0.188391	0.890466
594	chr1	45313200	45314149	FALSE	Stable	4.18979	5.68129e-11	4.49815	2.01404e-14	0.432664	0.735159
595	chr1	45314700	45314949	FALSE	Stable	3.28034	1.85444e-07	2.66018	3.32404e-06	0.0103034	0.994228
597	chr1	45319800	45320249	FALSE	Stable	2.57168	3.51751e-05	3.86906	2.98393e-11	-0.590329	0.623265
598	chr1	45320450	45320899	FALSE	Stable	3.54051	2.16118e-08	5.11943	6.76039e-18	-0.00508214	0.997248
599	chr1	45321250	45321499	FALSE	Stable	1.83269	0.00295374	3.31744	8.97508e-09	0.0738531	0.960268
600	chr1	45385850	45386499	FALSE	Stable	3.50651	2.87282e-08	2.49607	1.24139e-05	0.237237	0.858769
601	chr1	45459900	45460099	FALSE	Stable	2.09799	0.000685838	2.76826	1.34918e-06	-1.28012	0.103609
602	chr1	45460400	45460849	FALSE	Stable	2.6742	1.74845e-05	2.75537	1.50013e-06	-0.116746	0.933047
603	chr1	45460950	45461849	FALSE	Stable	4.95081	2.17574e-14	2.54643	8.33208e-06	-0.0859169	0.952952
605	chr1	45501150	45501299	FALSE	Stable	2.49809	5.74551e-05	2.76219	1.41556e-06	-0.284884	0.82673
606	chr1	45501350	45503699	FALSE	Stable	4.17084	6.8428e-11	3.89126	2.329e-11	0.348767	0.78766
607	chr1	45587650	45587749	FALSE	Stable	2.04828	0.000914093	1.40851	0.0133155	-0.387182	0.763603
608	chr1	45588300	45588599	FALSE	Stable	2.65101	2.04571e-05	3.28591	1.22475e-08	-0.0735018	0.960496
610	chr1	45672050	45675949	FALSE	Stable	3.84652	1.45754e-09	3.99786	7.13622e-12	-0.0296225	0.985397
611	chr1	45676200	45676399	FALSE	Stable	2.23048	0.000313008	3.90132	2.09479e-11	-0.0970113	0.94573
612	chr1	45676550	45676999	FALSE	Stable	3.78545	2.51577e-09	1.95982	0.000575248	-0.0113175	0.993713
614	chr1	45760000	45762499	FALSE	Stable	4.0416	2.36715e-10	4.97092	5.04156e-17	-0.0587381	0.969214
615	chr1	45762800	45763149	FALSE	Stable	1.35368	0.0277693	3.09331	7.5302e-08	-0.54812	0.657371
617	chr1	45764800	45768249	FALSE	Stable	4.26603	2.70556e-11	3.9025	2.07291e-11	-0.0474578	0.975258
618	chr1	45794800	45796099	FALSE	Stable	4.75336	1.69184e-13	3.59758	5.44377e-10	0.41585	0.745806
619	chr1	45860050	45860549	FALSE	Stable	2.47785	6.56874e-05	2.28191	6.27322e-05	-0.032722	0.983841
621	chr1	45864750	45865349	FALSE	Stable	2.09499	0.00069813	4.08855	2.55439e-12	-0.327162	0.800493
622	chr1	45865550	45866449	FALSE	Stable	2.98745	1.81251e-06	3.418	3.33248e-09	-0.194383	0.886933
623	chr1	45866500	45867399	FALSE	Stable	3.58331	1.49488e-08	3.075	8.93102e-08	-0.193449	0.887239
624	chr1	45867650	45867799	FALSE	Stable	2.81139	6.62363e-06	1.56603	0.00590307	0.21356	0.875026
625	chr1	45868750	45868899	FALSE	Stable	1.48781	0.0156286	2.30923	5.1379e-05	-0.435464	0.733777
626	chr1	46066300	46067399	TRUE	Stable	4.30242	1.87219e-11	3.39987	4.00537e-09	0.126722	0.92751
628	chr1	46279050	46279199	FALSE	Stable	3.39799	7.08053e-08	2.04567	0.000327862	0.339887	0.792296
629	chr1	46417350	46417449	FALSE	Stable	3.5852	1.46987e-08	2.90745	4.0297e-07	0.677751	0.549153
633	chr1	46828800	46831999	FALSE	Stable	4.58585	1.02517e-12	3.39947	4.0205e-09	0.508665	0.684355
634	chr1	46832250	46832349	FALSE	Stable	1.81955	0.00316094	1.96053	0.000572663	0.834057	0.404613
636	chr1	46851150	46851599	FALSE	Stable	2.69917	1.46698e-05	2.79744	1.04656e-06	0.130986	0.925282
637	chr1	46851750	46852049	FALSE	Stable	2.81881	6.28249e-06	2.29484	5.70696e-05	0.169673	0.902398
638	chr1	46852300	46854449	TRUE	Stable	4.66607	4.43013e-13	4.36294	1.0317e-13	0.519734	0.676715
639	chr1	46854500	46854699	TRUE	Stable	2.56512	3.68418e-05	2.35747	3.58846e-05	0.436911	0.732914
640	chr1	46887400	46887599	FALSE	Stable	1.76378	0.00420705	3.66632	2.66357e-10	-0.910876	0.336834
641	chr1	46887850	46887949	FALSE	Stable	2.97458	1.99461e-06	1.68699	0.00302066	0.275162	0.832422
642	chr1	46888250	46888349	FALSE	Stable	3.26896	2.03085e-07	1.53483	0.00696784	0.721695	0.508892
643	chr1	46888450	46888599	FALSE	Stable	1.66056	0.0070068	1.99259	0.000465771	0.0539146	0.971939
644	chr1	47039400	47039799	FALSE	Stable	2.01504	0.00110131	2.62	4.61626e-06	0.0963011	0.94618
645	chr1	47073150	47073249	FALSE	Stable	1.26895	0.0390951	3.43928	2.71069e-09	-0.596495	0.618452
646	chr1	47103050	47103299	FALSE	Stable	2.17966	0.000424482	3.34859	6.64025e-09	-0.193895	0.887102
647	chr1	47103900	47104199	FALSE	Stable	3.93391	6.50136e-10	2.62753	4.3433e-06	0.279428	0.829467
648	chr1	47104950	47105049	FALSE	Stable	2.02614	0.00103403	2.34816	3.84534e-05	-0.3428	0.79045
654	chr1	47433200	47433949	FALSE	Stable	3.21695	3.07342e-07	1.8109	0.00145885	1.2426	0.119172
656	chr1	47435200	47435399	FALSE	Stable	2.50065	5.65357e-05	1.55622	0.00622377	0.590134	0.623294
657	chr1	47436200	47436349	FALSE	Stable	1.75599	0.00437158	2.7553	1.50013e-06	0.574528	0.636876
660	chr1	47491850	47491999	FALSE	Stable	3.40592	6.64066e-08	2.20336	0.000110677	0.190123	0.889728
661	chr1	47492050	47492249	FALSE	Stable	1.45076	0.0183705	2.90987	3.94736e-07	-0.162982	0.906609
662	chr1	48155200	48155349	FALSE	Stable	2.97111	2.04908e-06	2.56223	7.35072e-06	0.408881	0.749689
663	chr1	48155750	48156049	FALSE	Stable	2.44323	8.22099e-05	3.10604	6.67503e-08	0.895792	0.349407
664	chr1	48452600	48452949	FALSE	Stable	3.09392	8.06054e-07	3.81916	5.16097e-11	0.266423	0.838023
665	chr1	48453000	48453149	FALSE	Stable	1.62882	0.00816599	2.99258	1.88482e-07	-0.372096	0.773808
666	chr1	48453300	48453849	FALSE	Stable	3.59529	1.35197e-08	3.49381	1.57512e-09	0.487432	0.698687
667	chr1	48454050	48454399	FALSE	Stable	3.70469	5.19682e-09	1.61675	0.00447397	0.250997	0.84831
669	chr1	48462250	48462449	FALSE	Stable	3.53196	2.30589e-08	3.20619	2.62111e-08	0.304995	0.814497
670	chr1	49029000	49029099	FALSE	Stable	1.55093	0.0117699	1.24133	0.0292445	-0.702839	0.525972
671	chr1	49030700	49030799	FALSE	Stable	2.11943	0.000604486	2.29781	5.58329e-05	-0.178378	0.897137
672	chr1	49378800	49379049	FALSE	Stable	3.20014	3.51023e-07	3.03376	1.29811e-07	-0.846061	0.39429
673	chr1	49380250	49380399	FALSE	Stable	1.75915	0.00430984	2.65876	3.36058e-06	-0.899602	0.346392
682	chr1	51617150	51618199	FALSE	Stable	4.01687	2.98756e-10	2.88236	5.03536e-07	0.0314917	0.984514
683	chr1	51618350	51618999	FALSE	Stable	2.84901	5.04701e-06	3.06427	9.82932e-08	0.125507	0.928383
684	chr1	51648750	51648949	FALSE	Stable	2.45147	7.79389e-05	1.95919	0.00057739	0.461143	0.717978
685	chr1	51649000	51651999	TRUE	Stable	4.14482	8.71156e-11	3.18608	3.16357e-08	0.852596	0.386785
686	chr1	51670650	51670749	FALSE	Stable	2.67187	1.77905e-05	1.73462	0.00229395	0.327396	0.800308
688	chr1	51696550	51697999	FALSE	Stable	3.31427	1.40795e-07	3.69763	1.90555e-10	0.664646	0.56018
689	chr1	51698250	51698449	FALSE	Stable	3.64107	9.07568e-09	1.81273	0.00144372	0.478224	0.706362
690	chr1	51705700	51706049	FALSE	Stable	2.60793	2.75471e-05	3.72303	1.45372e-10	0.443507	0.728594
692	chr1	51707000	51707149	FALSE	Stable	2.39792	0.000109985	1.9195	0.000743868	0.457655	0.719798
697	chr1	51914550	51916249	TRUE	Stable	4.44006	4.63512e-12	4.70708	1.51255e-15	0.353138	0.78506
699	chr1	52079450	52079749	FALSE	Stable	3.251	2.34263e-07	1.90008	0.000840755	0.323966	0.802451
700	chr1	52080200	52080849	FALSE	Stable	3.31912	1.35238e-07	2.55949	7.51639e-06	0.137328	0.921715
702	chr1	52113300	52113749	TRUE	Stable	2.71586	1.30926e-05	2.2187	9.92956e-05	0.252152	0.847569
703	chr1	52176350	52176499	FALSE	Stable	3.48975	3.31035e-08	1.61491	0.00451646	0.862396	0.378728
704	chr1	52176750	52176899	FALSE	Stable	1.27802	0.0377388	1.81967	0.0013841	0.165396	0.905546
705	chr1	52232100	52233199	FALSE	Stable	3.36289	9.50463e-08	3.13685	5.01972e-08	0.622827	0.596614
706	chr1	52241500	52242249	FALSE	Stable	2.4809	6.4373e-05	3.43553	2.80201e-09	0.333642	0.796203
707	chr1	52242650	52243249	FALSE	Stable	2.65437	2.00219e-05	2.36831	3.30732e-05	0.140702	0.919495
708	chr1	52243750	52243849	FALSE	Stable	1.54221	0.0122141	3.36161	5.86098e-09	-0.245566	0.852512
709	chr1	52260200	52260299	FALSE	Stable	2.17929	0.000425365	2.19739	0.00011538	-0.0180977	0.990095
710	chr1	52292950	52293399	FALSE	Stable	3.66076	7.68781e-09	1.81309	0.00144093	1.03301	0.240936
711	chr1	52294150	52294299	FALSE	Stable	2.62158	2.50829e-05	1.85017	0.00114876	0.326626	0.80068
712	chr1	52294550	52294649	FALSE	Stable	1.96148	0.00148388	1.55506	0.00625812	1.38146	0.0680649
713	chr1	52305300	52305499	FALSE	Stable	4.2239	4.11388e-11	1.33802	0.0187388	0.544102	0.660515
714	chr1	52306250	52306599	FALSE	Stable	2.90597	3.32464e-06	1.67025	0.00332345	0.978157	0.281727
718	chr1	52578000	52578499	TRUE	Stable	2.69856	1.47337e-05	3.27425	1.37237e-08	0.486984	0.698988
719	chr1	52578750	52578949	TRUE	Stable	2.13408	0.000557271	2.70938	2.21101e-06	0.97825	0.281633
721	chr1	52630350	52631449	FALSE	Stable	4.44598	4.36742e-12	4.11628	1.84776e-12	0.398217	0.756667
722	chr1	52651500	52651949	FALSE	Stable	2.53345	4.54204e-05	2.64049	3.91084e-06	0.315507	0.807489
723	chr1	52652000	52653999	FALSE	Stable	3.9925	3.75705e-10	3.78357	7.58508e-11	0.219529	0.871179
724	chr1	52817350	52817549	FALSE	Stable	2.22274	0.000328107	1.57797	0.00553298	0.387205	0.763603
725	chr1	52845150	52845299	FALSE	Stable	3.03475	1.26424e-06	2.34943	3.81129e-05	0.240539	0.856142
726	chr1	53062850	53062949	FALSE	Stable	1.95307	0.00155237	1.72262	0.00245909	0.209676	0.8772
728	chr1	53123700	53124099	FALSE	Stable	3.0275	1.33962e-06	2.7358	1.76735e-06	1.26122	0.110674
729	chr1	53124750	53124899	FALSE	Stable	1.96092	0.00148845	1.38399	0.0150175	0.222631	0.869075
730	chr1	53200600	53201899	FALSE	Stable	3.2454	2.4503e-07	4.14637	1.30031e-12	0.213121	0.875299
731	chr1	53201950	53202049	FALSE	Stable	3.92493	7.04911e-10	2.84849	6.76111e-07	0.064007	0.965601
732	chr1	53202100	53203349	FALSE	Stable	3.64909	8.47968e-09	3.71038	1.66663e-10	0.414394	0.746904
733	chr1	53203400	53203599	FALSE	Stable	3.60874	1.20362e-08	2.71798	2.05518e-06	0.869991	0.371664
734	chr1	53296450	53297449	FALSE	Stable	2.88071	4.01733e-06	3.26362	1.51651e-08	0.401348	0.754499
735	chr1	53313050	53314299	FALSE	Stable	4.02874	2.65962e-10	3.5033	1.42226e-09	0.486904	0.698992
736	chr1	53352300	53352599	FALSE	Stable	2.04348	0.000937733	3.00004	1.76492e-07	0.0101929	0.994296
737	chr1	53706600	53707099	FALSE	Stable	2.98351	1.86716e-06	3.13842	4.95533e-08	0.224831	0.867554
738	chr1	53784850	53785099	FALSE	Stable	2.89619	3.57529e-06	1.88008	0.000953682	0.395196	0.758826
740	chr1	53909700	53909949	FALSE	Stable	3.85814	1.30739e-09	2.37587	3.12411e-05	0.872413	0.369391
742	chr1	54069600	54070149	FALSE	Stable	2.57826	3.36995e-05	2.79688	1.05186e-06	-0.141288	0.919019
743	chr1	54070500	54071399	FALSE	Stable	3.25465	2.27655e-07	3.06253	9.99036e-08	-0.287456	0.825223
745	chr1	54118750	54118899	FALSE	Stable	1.90145	0.00205389	2.04491	0.000329276	-0.911401	0.336591
746	chr1	54119400	54120349	FALSE	Stable	2.67794	1.70109e-05	2.6516	3.56719e-06	-0.470241	0.711683
749	chr1	54149200	54150049	FALSE	Stable	2.96532	2.14342e-06	3.71906	1.51607e-10	-0.138113	0.921219
750	chr1	54150250	54150599	FALSE	Stable	3.93529	6.42202e-10	1.57941	0.00548907	0.741912	0.490356
751	chr1	54150700	54151049	FALSE	Stable	1.8709	0.00242116	3.62318	4.17576e-10	-0.782768	0.451859
752	chr1	54194700	54195049	FALSE	Stable	2.85324	4.89967e-06	2.55803	7.60437e-06	0.0376412	0.980991
755	chr1	54250050	54250249	FALSE	Stable	2.13112	0.000565918	3.61963	4.32758e-10	0.498967	0.690852
756	chr1	54250850	54251199	FALSE	Stable	3.33681	1.1694e-07	2.14155	0.000170727	0.506331	0.686168
757	chr1	54438450	54439149	FALSE	Stable	4.29736	1.96775e-11	3.46505	2.09046e-09	0.433378	0.734589
759	chr1	54677400	54677499	FALSE	Stable	1.85112	0.0026817	1.31282	0.0210834	0.517534	0.678228
760	chr1	54702150	54704649	FALSE	Stable	4.23362	3.7528e-11	2.80741	9.60194e-07	0.54931	0.656055
762	chr1	54906150	54907999	TRUE	Stable	3.69302	5.74106e-09	3.5623	7.79583e-10	0.15576	0.910533
763	chr1	54908850	54909249	FALSE	Stable	3.3056	1.51034e-07	2.1033	0.000221985	-0.00218535	0.998688
764	chr1	54909400	54909549	FALSE	Stable	1.87966	0.00230953	2.43135	2.05014e-05	-0.582822	0.630758
765	chr1	54913300	54915449	FALSE	Stable	3.01283	1.49409e-06	3.52531	1.13338e-09	-0.219992	0.87099
766	chr1	54915750	54916749	FALSE	Stable	3.38952	7.60291e-08	2.71949	2.02876e-06	0.0782286	0.957296
767	chr1	54916900	54916999	FALSE	Stable	2.54142	4.3109e-05	3.54263	9.52479e-10	-0.00955234	0.994847
768	chr1	54917150	54917799	FALSE	Stable	2.10654	0.000652665	4.14865	1.26909e-12	0.148196	0.914597
769	chr1	54925350	54927199	FALSE	Stable	3.53683	2.22512e-08	3.55207	8.68911e-10	0.277245	0.831303
770	chr1	54930600	54930949	TRUE	Stable	2.81078	6.65062e-06	1.2284	0.030974	1.35372	0.076839
772	chr1	54960400	54961499	FALSE	Stable	2.88266	3.95764e-06	2.35689	3.60487e-05	0.697832	0.530319
774	chr1	54966350	54966499	FALSE	Stable	2.95983	2.22963e-06	1.75105	0.00208403	0.181819	0.895162
776	chr1	54969750	54970799	FALSE	Stable	3.63122	9.89102e-09	1.8372	0.00124498	0.492199	0.695703
777	chr1	54971300	54972099	TRUE	Stable	2.90009	3.47294e-06	2.98174	2.07863e-07	0.242118	0.855132
778	chr1	54972350	54972649	TRUE	Stable	2.73791	1.11854e-05	3.49654	1.5294e-09	-0.115022	0.934354
779	chr1	54972800	54972999	FALSE	Stable	2.18996	0.000398831	1.81192	0.00144983	0.0237376	0.987666
780	chr1	55026500	55027949	FALSE	Stable	4.88455	4.38188e-14	4.25788	3.55105e-13	0.429135	0.737159
781	chr1	55052300	55052499	FALSE	Stable	2.61191	2.6775e-05	1.54888	0.00646749	0.444877	0.727948
782	chr1	55052900	55053149	FALSE	Stable	2.48856	6.13103e-05	2.06472	0.000288615	0.388256	0.763207
784	chr1	55087000	55089249	TRUE	Stable	4.35836	1.07298e-11	3.60337	5.11613e-10	0.884415	0.359285
786	chr1	55130700	55130949	TRUE	Stable	2.2125	0.000349222	2.44334	1.86639e-05	0.220416	0.870751
787	chr1	55131150	55131949	TRUE	Stable	4.47123	3.35725e-12	4.08254	2.73278e-12	0.271423	0.83487
788	chr1	55132150	55132299	FALSE	Stable	3.12737	6.2298e-07	3.89026	2.34982e-11	0.228777	0.864794
791	chr1	55192250	55193399	FALSE	Stable	3.3278	1.25726e-07	2.44306	1.87003e-05	0.685074	0.543079
792	chr1	55193650	55194049	FALSE	Stable	2.7503	1.02523e-05	1.94823	0.000619783	0.522983	0.674846
794	chr1	55210550	55210799	FALSE	Stable	3.26063	2.16768e-07	2.22115	9.75881e-05	0.421322	0.74219
795	chr1	55223800	55224349	FALSE	Stable	3.01931	1.42482e-06	2.57254	6.78961e-06	0.24019	0.856406
796	chr1	55224500	55226899	FALSE	Stable	3.12493	6.34944e-07	3.38881	4.47248e-09	0.189018	0.890081
797	chr1	55236750	55236949	TRUE	Stable	4.02924	2.64646e-10	1.42789	0.0120867	0.259572	0.842162
799	chr1	55432800	55433649	FALSE	Stable	3.52353	2.48477e-08	2.11299	0.000207716	1.37319	0.0707731
800	chr1	55434250	55434449	FALSE	Stable	3.34047	1.13465e-07	1.44458	0.0111072	0.868937	0.372433
801	chr1	55435000	55435249	FALSE	Stable	1.88483	0.00224589	1.74393	0.00217421	0.592155	0.621735
803	chr1	55911150	55911299	FALSE	Stable	2.64473	2.13743e-05	1.68064	0.00313351	0.94331	0.309684
804	chr1	55914350	55914499	FALSE	Stable	1.70161	0.00573579	2.17375	0.000136128	0.0892612	0.950822
808	chr1	56250050	56250499	FALSE	Stable	3.5384	2.19944e-08	3.07892	8.60329e-08	0.438706	0.73193
809	chr1	56539750	56540299	FALSE	Stable	1.46357	0.0173937	4.78809	5.24953e-16	0.360487	0.78073
811	chr1	56972500	56973499	TRUE	Stable	4.28613	2.21415e-11	3.51968	1.2027e-09	0.63451	0.586398
812	chr1	57095600	57096249	FALSE	Stable	3.61255	1.16681e-08	1.49384	0.00864953	1.08044	0.208557
813	chr1	57096450	57097199	TRUE	Stable	4.0464	2.25822e-10	2.78692	1.14578e-06	0.806868	0.429528
814	chr1	57377000	57377399	FALSE	Stable	3.10214	7.57245e-07	1.60839	0.00468363	1.04309	0.232858
815	chr1	57377700	57378049	FALSE	Stable	3.55673	1.87844e-08	1.48168	0.00920565	0.232162	0.861983
816	chr1	57405850	57407399	TRUE	Stable	4.61851	7.25861e-13	4.14743	1.28582e-12	0.430972	0.735985
818	chr1	57429550	57429649	FALSE	Stable	2.21395	0.000346169	3.02504	1.40396e-07	0.180575	0.896067
820	chr1	57440400	57440499	FALSE	Stable	1.43791	0.0194276	1.24734	0.0284824	0.964978	0.292039
821	chr1	57440700	57440949	FALSE	Stable	2.72793	1.20011e-05	1.70537	0.00271566	0.571905	0.639327
822	chr1	57476600	57476749	FALSE	Stable	2.10379	0.000663041	3.68673	2.13105e-10	0.72563	0.505142
823	chr1	57476950	57479699	FALSE	Stable	3.83111	1.67614e-09	3.83337	4.39985e-11	0.591339	0.622441
824	chr1	57479750	57480649	FALSE	Stable	3.90466	8.52562e-10	2.84394	7.02744e-07	0.915361	0.333407
826	chr1	57489750	57490049	FALSE	Stable	2.20038	0.000375048	3.28303	1.2606e-08	-0.308242	0.812269
827	chr1	57493100	57493249	FALSE	Stable	2.54383	4.25146e-05	1.79912	0.00156712	0.134845	0.923413
828	chr1	57675000	57675149	FALSE	Stable	1.33257	0.0302759	2.45076	1.76354e-05	-0.556794	0.650396
829	chr1	57774350	57775649	FALSE	Stable	4.3068	1.79438e-11	2.8674	5.72718e-07	0.345665	0.789093
830	chr1	57806500	57806649	FALSE	Stable	2.59492	3.01056e-05	1.9373	0.000664131	0.0477648	0.975199
832	chr1	57904050	57904399	FALSE	Stable	2.85403	4.87442e-06	1.37807	0.0154569	1.12166	0.182249
833	chr1	57904650	57905299	FALSE	Stable	3.06288	1.02314e-06	1.7624	0.00195168	0.496575	0.692961
834	chr1	57905450	57905949	FALSE	Stable	3.24832	2.39509e-07	3.34874	6.63495e-09	0.279323	0.829587
835	chr1	57906500	57907099	FALSE	Stable	3.78341	2.56301e-09	3.36144	5.87013e-09	0.21538	0.873835
838	chr1	57969550	57970049	FALSE	Stable	4.18226	6.14351e-11	2.8736	5.42209e-07	0.135256	0.923069
839	chr1	57995500	57995699	FALSE	Stable	3.04649	1.16372e-06	2.0392	0.000342124	0.9796	0.280705
840	chr1	57995950	57996499	FALSE	Stable	3.28025	1.85585e-07	2.48018	1.40651e-05	0.133515	0.924025
841	chr1	58392050	58393449	TRUE	Stable	5.10955	3.7685e-15	4.57604	7.93896e-15	0.309341	0.811913
842	chr1	58393600	58393899	FALSE	Stable	2.42803	9.09766e-05	2.87012	5.59139e-07	0.524675	0.674177
843	chr1	58422950	58423099	FALSE	Stable	2.45446	7.64839e-05	1.29232	0.0231713	0.321009	0.804359
844	chr1	58423150	58424149	FALSE	Stable	5.24951	8.25445e-16	4.36342	1.02602e-13	0.339433	0.792458
845	chr1	58445000	58446049	FALSE	Stable	2.97145	2.04388e-06	2.25178	7.82436e-05	0.438881	0.731909
846	chr1	58504400	58504949	FALSE	Stable	2.52968	4.66599e-05	3.2756	1.35567e-08	0.464476	0.715317
847	chr1	58586150	58586849	FALSE	Stable	3.67487	6.75848e-09	4.31539	1.82767e-13	0.515194	0.68028
848	chr1	58710950	58712349	FALSE	Stable	3.96624	4.82331e-10	4.45695	3.31776e-14	0.470332	0.711656
849	chr1	58713200	58713849	FALSE	Stable	5.14181	2.64676e-15	5.12829	5.85774e-18	0.399475	0.755562
850	chr1	58713900	58714199	FALSE	Stable	3.65896	7.79787e-09	1.22664	0.031219	-0.0579802	0.969621
851	chr1	58795800	58796099	FALSE	Stable	2.94174	2.54403e-06	2.0392	0.000342124	0.874851	0.367872
855	chr1	58951200	58951399	FALSE	Stable	2.705	1.40871e-05	1.22668	0.0312138	0.128209	0.926778
856	chr1	58972900	58973349	TRUE	Stable	2.90685	3.30569e-06	3.26773	1.45975e-08	0.34037	0.792247
857	chr1	58973550	58973949	TRUE	Stable	2.97683	1.96442e-06	2.6016	5.35399e-06	-0.0236951	0.987672
858	chr1	59119800	59120749	TRUE	Stable	3.56989	1.67586e-08	3.8743	2.8084e-11	0.575362	0.636368
860	chr1	59237850	59238049	FALSE	Stable	2.00778	0.00114721	1.56525	0.0059264	0.411381	0.748163
861	chr1	59268900	59271999	TRUE	Stable	3.98117	4.19144e-10	3.91765	1.75221e-11	0.160331	0.908216
862	chr1	59272300	59272549	FALSE	Stable	2.42118	9.50551e-05	1.87883	0.000960605	-0.075803	0.958749
863	chr1	59292150	59292349	FALSE	Stable	1.6276	0.00821457	2.38344	2.9546e-05	-0.786976	0.447885
864	chr1	59316450	59316549	FALSE	Stable	2.39861	0.000109558	2.86554	5.82043e-07	0.0944594	0.947442
865	chr1	59320850	59323199	TRUE	Stable	3.69173	5.80924e-09	4.01496	5.90633e-12	0.15089	0.913412
866	chr1	59323500	59323699	FALSE	Stable	2.16501	0.000463709	1.63806	0.00397737	-0.504846	0.687254
868	chr1	59332450	59332599	FALSE	Stable	2.56229	3.75616e-05	2.68344	2.74501e-06	0.264809	0.83886
869	chr1	59334250	59334999	FALSE	Stable	2.78603	7.97027e-06	3.29276	1.14443e-08	0.263404	0.839747
870	chr1	59335150	59335249	FALSE	Stable	2.6831	1.64215e-05	1.79847	0.00157235	1.44602	0.0510224
871	chr1	59339350	59339549	FALSE	Stable	2.2568	0.00026731	2.69683	2.45108e-06	0.267009	0.837966
878	chr1	59394300	59394499	FALSE	Stable	2.89869	3.5098e-06	3.50359	1.4177e-09	-0.0435041	0.977325
879	chr1	59394800	59395649	FALSE	Stable	3.94532	5.85723e-10	3.36399	5.72429e-09	0.0730147	0.960738
880	chr1	59437400	59437899	FALSE	Stable	3.43921	5.0549e-08	2.01243	0.000408143	0.496499	0.693002
881	chr1	59438300	59438599	FALSE	Stable	3.30172	1.55483e-07	2.01525	0.000400576	0.445337	0.727754
883	chr1	59450400	59450549	FALSE	Stable	2.66772	1.83003e-05	1.79281	0.00162667	0.265054	0.838587
884	chr1	59450650	59451149	FALSE	Stable	1.78636	0.00375735	2.70564	2.2796e-06	0.0447366	0.976444
886	chr1	59458050	59458199	FALSE	Stable	2.31653	0.000184268	2.1723	0.000137475	-0.465626	0.714304
887	chr1	59458500	59459199	FALSE	Stable	3.0376	1.23935e-06	3.47094	1.96791e-09	-0.0556602	0.970736
889	chr1	59480300	59482049	TRUE	Stable	5.46505	7.07004e-17	4.80805	4.1414e-16	0.295403	0.821216
890	chr1	59482100	59483149	TRUE	Stable	3.93104	6.67849e-10	4.10087	2.2118e-12	0.226947	0.865913
891	chr1	59483450	59483699	FALSE	Stable	2.33015	0.000169033	1.80456	0.00151691	0.491002	0.696424
892	chr1	59484450	59484549	FALSE	Stable	2.32476	0.000174929	2.03043	0.00036249	0.266643	0.837966
893	chr1	59484650	59485899	FALSE	Stable	3.31044	1.45185e-07	2.4563	1.68986e-05	0.452646	0.723207
894	chr1	59515700	59516449	FALSE	Stable	3.9423	6.0276e-10	3.65377	3.04209e-10	0.113448	0.935146
895	chr1	59520000	59520099	FALSE	Stable	2.54042	4.33633e-05	1.75251	0.00206732	0.767144	0.465947
897	chr1	59548750	59549049	FALSE	Stable	2.56147	3.77651e-05	1.88979	0.000896914	0.374605	0.772209
900	chr1	59633000	59633199	FALSE	Stable	1.38103	0.024776	3.47678	1.85465e-09	-0.521916	0.675458
901	chr1	59669850	59671599	FALSE	Stable	4.51612	2.10403e-12	3.64291	3.41755e-10	0.489158	0.697299
902	chr1	59684450	59685799	FALSE	Stable	4.31809	1.6036e-11	3.83365	4.38523e-11	0.656512	0.567246
903	chr1	59762300	59764249	TRUE	Stable	5.31127	3.96024e-16	4.55054	1.07777e-14	0.398829	0.756177
904	chr1	59764350	59764999	FALSE	Stable	3.33746	1.16297e-07	2.66127	3.29345e-06	0.124979	0.928664
905	chr1	59830700	59830949	FALSE	Stable	1.73166	0.00494255	2.42684	2.12098e-05	-0.133791	0.923819
906	chr1	59831000	59831299	FALSE	Stable	3.53549	2.24402e-08	2.97615	2.18605e-07	-0.0505163	0.97386
907	chr1	59832750	59832949	FALSE	Stable	3.00333	1.60477e-06	1.75899	0.00198982	0.217388	0.872607
908	chr1	59833100	59833449	FALSE	Stable	3.62763	1.02148e-08	2.15676	0.000153324	-0.366079	0.777449
909	chr1	59834000	59834199	FALSE	Stable	2.41563	9.8376e-05	1.4221	0.0124491	0.152391	0.912446
910	chr1	59912400	59913649	TRUE	Stable	4.02596	2.72816e-10	3.75444	1.04003e-10	0.61993	0.598726
911	chr1	60097700	60098849	TRUE	Stable	3.46703	4.01256e-08	3.15619	4.18819e-08	0.271313	0.834927
912	chr1	60158150	60158349	FALSE	Stable	3.75933	3.19033e-09	2.77314	1.29367e-06	-0.0262503	0.986486
913	chr1	60179650	60180349	FALSE	Stable	2.30959	0.000192248	3.94837	1.23792e-11	-0.483059	0.702406
914	chr1	60180600	60181499	FALSE	Stable	4.76001	1.57505e-13	3.22021	2.29184e-08	0.253779	0.84631
916	chr1	60343200	60343599	FALSE	Stable	3.49399	3.19551e-08	2.15656	0.000153549	0.492437	0.69549
917	chr1	60408700	60410599	TRUE	Stable	4.11528	1.16467e-10	4.31636	1.80838e-13	0.187699	0.891024
918	chr1	60565900	60566749	FALSE	Stable	3.66263	7.55594e-09	3.14063	4.86722e-08	0.38381	0.766146
919	chr1	60567000	60567299	FALSE	Stable	4.12735	1.04042e-10	2.89763	4.39648e-07	0.202764	0.881225
924	chr1	61099900	61100249	FALSE	Stable	1.71819	0.00528639	3.58995	5.86324e-10	0.560031	0.647686
926	chr1	61139550	61139949	FALSE	Stable	3.67069	7.02079e-09	1.33555	0.0189661	1.13065	0.176985
928	chr1	61141050	61143749	FALSE	Stable	4.17448	6.59678e-11	3.12966	5.35757e-08	0.873017	0.369323
930	chr1	61146600	61146699	FALSE	Stable	3.32983	1.23609e-07	2.56866	6.98806e-06	0.761162	0.47105
931	chr1	61151500	61151749	FALSE	Stable	2.38425	0.00012009	1.58358	0.00536513	1.25193	0.114883
932	chr1	61151950	61152249	FALSE	Stable	3.48326	3.5051e-08	1.40633	0.0134591	1.30899	0.0924362
934	chr1	61180850	61180999	FALSE	Stable	1.75554	0.00438102	1.75665	0.00201768	0.228149	0.865236
935	chr1	61181650	61182099	FALSE	Stable	2.61432	2.63391e-05	1.54323	0.00666795	1.27413	0.106062
942	chr1	61272950	61273099	FALSE	Stable	2.44144	8.31713e-05	1.61299	0.00456312	-0.203353	0.880702
944	chr1	61297750	61297999	TRUE	Stable	2.46738	7.03733e-05	3.06131	1.00969e-07	0.702195	0.52639
945	chr1	61298500	61298949	TRUE	Stable	3.54385	2.10224e-08	2.15177	0.00015876	0.823831	0.414878
950	chr1	61302950	61303149	FALSE	Stable	1.94067	0.00166076	1.51244	0.00783848	0.657496	0.56611
951	chr1	61303350	61303549	FALSE	Stable	2.39831	0.000109748	3.13424	5.12824e-08	0.8379	0.401794
952	chr1	61353300	61353499	FALSE	Stable	2.63268	2.32807e-05	1.37504	0.0156862	0.489699	0.697211
953	chr1	61373550	61373749	FALSE	Stable	1.88184	0.00228275	1.84266	0.00120362	0.00804557	0.995975
954	chr1	61379850	61379999	FALSE	Stable	3.80736	2.07014e-09	1.33497	0.0190069	0.87087	0.370808
956	chr1	61404250	61404849	FALSE	Stable	3.3155	1.3939e-07	2.51869	1.03634e-05	0.178658	0.896968
957	chr1	61405050	61405749	FALSE	Stable	3.52313	2.49341e-08	3.12049	5.84616e-08	0.196051	0.885751
958	chr1	61405900	61406599	FALSE	Stable	3.41976	5.95308e-08	2.8067	9.66115e-07	0.368056	0.776275
959	chr1	61407350	61408349	TRUE	Stable	3.99031	3.83994e-10	2.08462	0.000252204	1.00812	0.258219
960	chr1	61530500	61530699	FALSE	Stable	2.84912	5.04314e-06	1.80669	0.00149698	0.432572	0.735184
962	chr1	61925750	61925949	FALSE	Stable	3.27998	1.85979e-07	1.21131	0.0334118	0.298274	0.819921
963	chr1	61926150	61926299	FALSE	Stable	2.31273	0.00018872	1.49816	0.00845505	0.196414	0.885563
964	chr1	61926400	61926599	FALSE	Stable	1.2471	0.0425706	2.60783	5.09752e-06	-0.0724596	0.96102
965	chr1	61926950	61929249	FALSE	Stable	3.75973	3.18195e-09	3.80358	6.07153e-11	0.481688	0.70357
966	chr1	61929900	61930299	FALSE	Stable	3.4218	5.85309e-08	1.45116	0.0107463	0.766153	0.467044
967	chr1	61930600	61930749	FALSE	Stable	3.07342	9.42106e-07	1.33067	0.0193832	0.715798	0.514157
969	chr1	61934900	61934999	FALSE	Stable	1.91591	0.00190028	2.23731	8.68139e-05	0.240003	0.856406
972	chr1	62015450	62017549	FALSE	Stable	3.69711	5.54272e-09	3.60017	5.29129e-10	0.641899	0.579703
973	chr1	62017750	62018549	FALSE	Stable	3.69344	5.72003e-09	3.31044	9.61154e-09	0.608394	0.608389
974	chr1	62018700	62019149	FALSE	Stable	2.36661	0.000134581	3.06939	9.40326e-08	0.483411	0.702012
975	chr1	62019350	62019849	FALSE	Stable	2.99842	1.66714e-06	1.75906	0.00198955	0.52302	0.674846
976	chr1	62020150	62021049	FALSE	Stable	3.39363	7.35406e-08	3.32046	8.75569e-09	0.537215	0.665344
980	chr1	62081150	62081799	FALSE	Stable	4.57588	1.13497e-12	3.71411	1.59771e-10	0.507472	0.685153
981	chr1	62082150	62082849	FALSE	Stable	3.16615	4.58739e-07	1.89529	0.000867164	0.647725	0.574701
982	chr1	62084400	62084549	FALSE	Stable	2.91231	3.17379e-06	1.75908	0.00198941	0.543377	0.660822
983	chr1	62085550	62086699	FALSE	Stable	2.27182	0.000243476	2.97383	2.23307e-07	0.143614	0.917617
984	chr1	62153900	62154149	FALSE	Stable	1.66987	0.0067033	3.10035	7.0462e-08	-0.134349	0.923531
985	chr1	62155150	62155999	FALSE	Stable	3.06883	9.75259e-07	2.99993	1.76684e-07	0.470626	0.711566
986	chr1	62156300	62157249	FALSE	Stable	4.20763	4.83072e-11	2.99833	1.79264e-07	0.586988	0.626525
988	chr1	62165200	62165999	FALSE	Stable	3.1365	5.79648e-07	2.68505	2.70837e-06	0.415127	0.746223
989	chr1	62166500	62166799	FALSE	Stable	2.91342	3.15216e-06	1.56409	0.00596307	0.508188	0.684619
993	chr1	62189500	62189699	FALSE	Stable	2.77383	8.69359e-06	1.19135	0.0364327	0.972618	0.286504
994	chr1	62190150	62190299	FALSE	Stable	2.19369	0.000390843	2.19067	0.000120937	1.29915	0.0962488
995	chr1	62190350	62190849	FALSE	Stable	3.54248	2.12409e-08	2.28322	6.21269e-05	0.962199	0.294122
996	chr1	62206400	62206549	FALSE	Stable	2.85839	4.72071e-06	1.27491	0.0250913	-0.0180379	0.990095
998	chr1	62243550	62244049	FALSE	Stable	4.17603	6.51378e-11	2.91357	3.82296e-07	1.24168	0.11963
1003	chr1	62373600	62373699	FALSE	Stable	2.27212	0.000242995	1.51664	0.00766793	0.145619	0.916106
1004	chr1	62374200	62374349	FALSE	Stable	2.45143	7.79389e-05	2.73567	1.76898e-06	-0.305019	0.814476
1005	chr1	62375000	62375099	FALSE	Stable	2.21862	0.000336643	1.53272	0.00704666	0.0760396	0.958643
1007	chr1	62380750	62380899	FALSE	Stable	1.91121	0.00194697	1.97299	0.000528306	-1.07422	0.212389
1008	chr1	62381400	62381549	FALSE	Stable	1.83083	0.00298005	1.98014	0.000504217	0.412086	0.747768
1010	chr1	62382150	62382449	FALSE	Stable	3.9961	3.6418e-10	3.06872	9.44009e-08	0.906603	0.340595
1011	chr1	62382550	62383149	TRUE	Stable	3.54015	2.16776e-08	3.48486	1.71188e-09	0.604727	0.610921
1012	chr1	62383300	62384299	TRUE	Stable	3.44885	4.67389e-08	2.11569	0.000203812	0.656048	0.567852
1013	chr1	62390550	62390749	FALSE	Stable	3.04709	1.15848e-06	1.25564	0.0274513	0.177477	0.897778
1014	chr1	62436000	62436199	FALSE	Stable	1.36772	0.0261902	2.9887	1.95137e-07	-0.645934	0.576349
1016	chr1	62562750	62562899	TRUE	Stable	2.39324	0.000113312	1.19084	0.0365034	1.17126	0.153867
1018	chr1	62564150	62564899	FALSE	Stable	4.0126	3.11346e-10	1.99527	0.00045759	1.39641	0.0636312
1024	chr1	62644450	62644799	FALSE	Stable	2.95513	2.3079e-06	1.778	0.00177625	0.919564	0.329811
1025	chr1	62645650	62645899	FALSE	Stable	2.10403	0.000662237	2.15305	0.000157333	0.503409	0.688148
1026	chr1	62647650	62647949	TRUE	Stable	2.80147	7.11419e-06	1.78606	0.00169238	0.984265	0.277606
1027	chr1	62648550	62649149	TRUE	Stable	3.04347	1.18969e-06	2.86857	5.66929e-07	1.13891	0.171957
1029	chr1	62702700	62703749	FALSE	Stable	3.73009	4.14086e-09	3.13422	5.1288e-08	0.717172	0.513006
1030	chr1	62703850	62703999	FALSE	Stable	1.885	0.00224373	2.4787	1.42273e-05	0.597813	0.616805
1031	chr1	62704100	62704299	FALSE	Stable	2.51529	5.12546e-05	1.13285	0.0467049	1.02814	0.244657
1033	chr1	62705550	62705949	FALSE	Stable	2.73268	1.15987e-05	1.97364	0.000526357	0.915807	0.333009
1034	chr1	62706050	62706699	FALSE	Stable	2.88454	3.90124e-06	2.43278	2.02755e-05	0.800176	0.435732
1036	chr1	62707100	62707449	FALSE	Stable	2.52619	4.7712e-05	3.43993	2.70068e-09	0.382389	0.767347
1037	chr1	62760200	62760499	FALSE	Stable	2.54735	4.16627e-05	2.09014	0.000243001	-0.0628371	0.966061
1039	chr1	62766500	62766799	TRUE	Stable	1.39839	0.0230135	3.06581	9.70191e-08	-0.439551	0.73141
1040	chr1	62767050	62767849	TRUE	Stable	3.16321	4.69493e-07	3.13555	5.0795e-08	-0.217344	0.872607
1041	chr1	62768050	62768199	FALSE	Stable	2.04096	0.000950943	2.82631	8.16784e-07	-0.223948	0.86806
1042	chr1	62791550	62791799	FALSE	Stable	1.6607	0.0070043	2.72139	1.99722e-06	0.49791	0.691811
1043	chr1	62792350	62792449	FALSE	Stable	3.02083	1.40775e-06	2.42051	2.22191e-05	-0.41212	0.747768
1045	chr1	62860000	62860199	FALSE	Stable	2.62047	2.52488e-05	2.6171	4.72666e-06	-0.606488	0.609785
1046	chr1	62860350	62860999	FALSE	Stable	2.89888	3.50569e-06	3.05337	1.0861e-07	-0.191837	0.888314
1048	chr1	62887100	62887249	FALSE	Stable	2.57467	3.45226e-05	1.13501	0.0462763	1.08536	0.205542
1049	chr1	62887950	62888149	FALSE	Stable	2.0781	0.000770404	2.24018	8.50777e-05	0.481519	0.703763
1050	chr1	62888250	62888749	FALSE	Stable	3.2974	1.61206e-07	2.39085	2.79003e-05	0.870233	0.371386
1051	chr1	62956400	62956499	FALSE	Stable	3.53209	2.30486e-08	1.98421	0.000492154	0.53544	0.66643
1052	chr1	63113150	63113999	FALSE	Stable	4.56339	1.29014e-12	4.01202	6.10087e-12	0.344781	0.789519
1053	chr1	63114100	63115149	FALSE	Stable	3.5438	2.10303e-08	3.21413	2.43223e-08	0.383971	0.766049
1054	chr1	63176200	63177749	FALSE	Stable	4.63325	6.30347e-13	3.923	1.65144e-11	0.56714	0.642535
1057	chr1	63246700	63247149	TRUE	Stable	2.18307	0.000415996	2.36509	3.39008e-05	0.144444	0.917148
1058	chr1	63247450	63248249	TRUE	Stable	2.63677	2.26056e-05	3.17875	3.39596e-08	0.00404547	0.997753
1059	chr1	63248300	63248599	FALSE	Stable	2.31746	0.000183365	2.6648	3.19865e-06	0.202096	0.881493
1061	chr1	63273250	63273649	FALSE	Stable	2.18142	0.00041994	2.89451	4.52041e-07	0.0279398	0.985928
1062	chr1	63367500	63367949	FALSE	Stable	2.04731	0.000918156	3.30035	1.06338e-08	-0.28627	0.825698
1063	chr1	63368100	63368199	FALSE	Stable	3.38716	7.73826e-08	1.61491	0.00451646	0.759813	0.472445
1065	chr1	63368650	63368949	TRUE	Stable	4.34153	1.26973e-11	1.67356	0.00326292	0.326197	0.800917
1066	chr1	63369450	63369749	TRUE	Stable	3.13007	6.1055e-07	2.23492	8.83362e-05	-0.136643	0.921929
1067	chr1	63414050	63414249	FALSE	Stable	2.5933	3.04067e-05	2.51315	1.08286e-05	-0.364628	0.778231
1068	chr1	63414350	63414599	FALSE	Stable	2.7703	8.92394e-06	1.96913	0.000541869	1.03043	0.242842
1069	chr1	63414650	63414999	FALSE	Stable	4.12295	1.08379e-10	1.44729	0.0109656	0.185361	0.892483
1070	chr1	63415150	63415399	FALSE	Stable	2.44782	7.97659e-05	2.2211	9.76146e-05	0.193505	0.887239
1071	chr1	63552150	63552249	FALSE	Stable	2.51893	5.00147e-05	2.00698	0.000423439	0.48426	0.701491
1072	chr1	63552450	63553049	FALSE	Stable	3.53795	2.20781e-08	2.98071	2.09907e-07	0.0371988	0.981232
1073	chr1	63553400	63553949	FALSE	Stable	2.52183	4.90739e-05	3.22967	2.09554e-08	0.256161	0.84448
1075	chr1	63730350	63731049	FALSE	Stable	3.39121	7.50557e-08	3.82918	4.61435e-11	0.641407	0.580257
1076	chr1	63765950	63766049	FALSE	Stable	3.12404	6.37917e-07	2.30576	5.26586e-05	-0.194153	0.886981
1077	chr1	63767650	63768199	FALSE	Stable	3.08203	8.8114e-07	2.26696	7.02317e-05	-0.0299132	0.985211
1078	chr1	63768350	63768699	FALSE	Stable	2.86603	4.4766e-06	2.15064	0.000160028	-0.436889	0.732914
1079	chr1	63768850	63769249	FALSE	Stable	1.68644	0.00617894	2.91626	3.73034e-07	-0.416536	0.745603
1081	chr1	63809250	63809649	FALSE	Stable	2.49036	6.05643e-05	3.18208	3.29026e-08	0.277797	0.830836
1085	chr1	64066500	64066699	FALSE	Stable	2.52471	4.81471e-05	2.72707	1.90522e-06	-0.812218	0.424948
1089	chr1	64120650	64121499	FALSE	Stable	3.5284	2.38047e-08	3.78497	7.47186e-11	0.026243	0.986486
1090	chr1	64121600	64123099	FALSE	Stable	5.17993	1.77189e-15	5.2522	9.73014e-19	0.1717	0.90103
1091	chr1	64164100	64164199	FALSE	Stable	3.08598	8.54831e-07	1.45658	0.0104589	0.027879	0.985936
1092	chr1	64189000	64189149	FALSE	Stable	3.02083	1.40775e-06	1.82799	0.00131532	0.1804	0.896159
1093	chr1	64532100	64533349	FALSE	Stable	4.36744	9.75659e-12	4.32166	1.6888e-13	0.559228	0.648315
1094	chr1	64533400	64534049	FALSE	Stable	4.76939	1.44686e-13	3.68445	2.17928e-10	0.371817	0.773808
1095	chr1	64616500	64617799	TRUE	Stable	4.12643	1.04925e-10	3.25011	1.72206e-08	0.573282	0.638056
1096	chr1	64618100	64618199	FALSE	Stable	1.80399	0.00342656	2.23731	8.68139e-05	0.862813	0.37845
1099	chr1	64690200	64690549	FALSE	Stable	2.9109	3.20683e-06	2.94765	2.82545e-07	0.606847	0.60957
1100	chr1	64691050	64691649	FALSE	Stable	3.08554	8.57938e-07	2.92288	3.5231e-07	0.511075	0.682761
1102	chr1	64956250	64956999	FALSE	Stable	3.53176	2.30971e-08	2.69759	2.43585e-06	0.533378	0.66811
1103	chr1	64975550	64975699	FALSE	Stable	2.25604	0.000268234	1.96693	0.000549404	-0.320757	0.804452
1104	chr1	65178550	65179099	TRUE	Stable	3.78195	2.59958e-09	3.61766	4.41135e-10	0.586838	0.626583
1105	chr1	65179300	65179849	TRUE	Stable	3.07141	9.55876e-07	1.98458	0.0004913	0.218664	0.871722
1106	chr1	65186100	65186399	FALSE	Stable	1.44254	0.0190387	2.86953	5.61966e-07	0.0230642	0.987837
1107	chr1	65186750	65187149	FALSE	Stable	2.81198	6.59598e-06	2.60769	5.1033e-06	0.361066	0.7807
1110	chr1	66245600	66245699	FALSE	Stable	1.70161	0.00573579	1.96053	0.000572663	0.302474	0.816462
1111	chr1	66251650	66251849	FALSE	Stable	2.0132	0.0011131	1.79424	0.00161282	0.508906	0.684018
1112	chr1	66251950	66252199	FALSE	Stable	1.90849	0.00197627	3.08208	8.34407e-08	0.607003	0.60957
1114	chr1	66321500	66321699	FALSE	Stable	3.6148	1.14343e-08	2.10213	0.000223594	-0.088859	0.950971
1115	chr1	66321750	66322099	FALSE	Stable	2.69757	1.48322e-05	1.80142	0.00154695	0.122957	0.929817
1116	chr1	66328850	66329149	FALSE	Stable	2.90018	3.47053e-06	1.96087	0.000572062	-0.0924793	0.948727
1117	chr1	66330600	66330999	FALSE	Stable	3.97465	4.45022e-10	2.21517	0.000101795	0.311619	0.810514
1118	chr1	66371200	66371349	FALSE	Stable	2.53547	4.47917e-05	1.81404	0.00143243	-0.291002	0.823292
1119	chr1	66371950	66372499	FALSE	Stable	3.24825	2.39581e-07	3.0024	1.73035e-07	0.218171	0.872182
1122	chr1	66700850	66701199	FALSE	Stable	2.84304	5.27852e-06	1.9072	0.000804577	0.576985	0.634751
1123	chr1	66815650	66815799	FALSE	Stable	2.71259	1.33767e-05	2.33582	4.21846e-05	0.349082	0.787518
1124	chr1	66815850	66817599	TRUE	Stable	4.66867	4.30702e-13	4.04968	4.00045e-12	0.274811	0.832476
1125	chr1	66863100	66863249	FALSE	Stable	3.14188	5.54723e-07	2.11832	0.000200234	0.413703	0.747227
1127	chr1	66941300	66941749	FALSE	Stable	2.18249	0.000417524	3.83702	4.21553e-11	-0.0959271	0.946503
1128	chr1	67038650	67038799	FALSE	Stable	2.86343	4.55378e-06	1.60766	0.00470151	0.228819	0.864794
1129	chr1	67044550	67045149	FALSE	Stable	1.92872	0.00177561	3.21296	2.46003e-08	-0.791192	0.444313
1130	chr1	67045500	67045849	FALSE	Stable	1.81418	0.00325031	3.56132	7.88044e-10	-0.777616	0.456758
1132	chr1	67051750	67052799	FALSE	Stable	3.40946	6.47124e-08	3.21063	2.51947e-08	0.38189	0.767524
1133	chr1	67053100	67053899	FALSE	Stable	3.38579	7.82717e-08	3.91299	1.8447e-11	0.265167	0.838583
1134	chr1	67103400	67103899	FALSE	Stable	4.18233	6.14154e-11	1.9898	0.000474321	0.284396	0.826855
1135	chr1	67104150	67104649	FALSE	Stable	4.83912	6.99432e-14	2.61065	4.9817e-06	0.391522	0.761128
1136	chr1	67159700	67159849	FALSE	Stable	1.82166	0.00312753	1.63154	0.00412305	0.576071	0.635554
1137	chr1	67160000	67160149	FALSE	Stable	3.36018	9.72005e-08	1.45325	0.0106325	0.894491	0.350627
1139	chr1	67193550	67193749	FALSE	Stable	3.96177	5.03242e-10	1.20648	0.034083	0.736676	0.494421
1141	chr1	67236250	67236649	FALSE	Stable	3.66666	7.28657e-09	2.46474	1.58395e-05	-0.148194	0.914597
1143	chr1	67464600	67465099	FALSE	Stable	3.76342	3.07787e-09	1.89214	0.00088358	0.844335	0.395786
1144	chr1	67465650	67466049	FALSE	Stable	3.38966	7.59844e-08	1.28986	0.0234293	0.845026	0.395084
1146	chr1	67795400	67796149	FALSE	Stable	2.75982	9.5811e-06	5.04232	1.87374e-17	0.510524	0.683036
1148	chr1	67797900	67798099	FALSE	Stable	3.34427	1.10116e-07	1.9132	0.000774681	-0.170448	0.901909
1149	chr1	68106150	68106249	FALSE	Stable	1.62552	0.00828899	1.82799	0.00131532	0.358921	0.781706
1151	chr1	69466050	69466199	FALSE	Stable	1.32072	0.0317851	3.08847	7.84503e-08	0.21972	0.87106
1152	chr1	69466500	69467299	FALSE	Stable	3.6173	1.11952e-08	1.78292	0.00172562	-0.108169	0.938735
1155	chr1	69591550	69591649	FALSE	Stable	3.41207	6.33001e-08	3.19726	2.85263e-08	0.194031	0.886981
1156	chr1	69591850	69592199	FALSE	Stable	2.859	4.70473e-06	2.11719	0.000201795	0.707213	0.522301
1157	chr1	69687600	69688049	FALSE	Stable	3.70957	4.98566e-09	2.01824	0.00039281	-0.145618	0.916106
1158	chr1	69827000	69827149	FALSE	Stable	2.77383	8.69359e-06	2.80672	9.65916e-07	-0.0536684	0.972174
1160	chr1	70442250	70442549	FALSE	Stable	2.9037	3.37738e-06	2.51273	1.08658e-05	-0.0538091	0.972025
1161	chr1	71102000	71102349	FALSE	Stable	2.69985	1.46186e-05	2.44112	1.89841e-05	0.00115095	0.99925
1162	chr1	71102400	71102949	FALSE	Stable	2.9913	1.76146e-06	3.4083	3.68368e-09	0.603126	0.612489
1163	chr1	71103200	71103599	FALSE	Stable	2.84536	5.18834e-06	2.95402	2.66353e-07	-0.144235	0.91733
1166	chr1	71556600	71557649	FALSE	Stable	3.45105	4.589e-08	2.9462	2.86255e-07	0.553348	0.652981
1167	chr1	71651000	71651549	FALSE	Stable	2.66308	1.89043e-05	2.20458	0.0001097	0.422188	0.741578
1168	chr1	71652050	71654499	TRUE	Stable	4.94942	2.19733e-14	4.70243	1.59386e-15	0.252629	0.84726
1170	chr1	71682050	71682149	FALSE	Stable	2.3955	0.000111608	2.02475	0.000376389	-0.239107	0.857178
1171	chr1	71762900	71763649	FALSE	Stable	2.76747	9.09146e-06	3.24155	1.87038e-08	0.00419996	0.99765
1172	chr1	71763800	71764349	FALSE	Stable	1.45235	0.0182465	3.16365	3.90772e-08	-0.425638	0.739404
1173	chr1	71764400	71764499	FALSE	Stable	2.80497	6.9331e-06	1.75899	0.00198982	0.0190286	0.989685
1174	chr1	71788200	71788349	FALSE	Stable	2.71416	1.32299e-05	2.88555	4.89554e-07	-0.192168	0.887966
1175	chr1	71788950	71789299	FALSE	Stable	3.45787	4.32718e-08	2.30605	5.25867e-05	-0.198295	0.883874
1176	chr1	71800650	71800999	FALSE	Stable	1.31864	0.0320552	2.97796	2.15171e-07	-0.467808	0.713303
1178	chr1	71801950	71802199	FALSE	Stable	2.25449	0.000270513	2.97796	2.15171e-07	-0.751155	0.480829
1179	chr1	71836700	71838699	FALSE	Stable	4.07432	1.71914e-10	4.11842	1.80117e-12	0.0962907	0.94618
1182	chr1	71855200	71855299	FALSE	Stable	3.57954	1.54298e-08	1.71999	0.00249591	-0.746078	0.485783
1186	chr1	71866250	71866449	FALSE	Stable	4.22541	4.07162e-11	1.75193	0.00207366	0.871963	0.369769
1187	chr1	71877200	71877499	FALSE	Stable	2.14484	0.00052181	3.06234	1.00056e-07	-0.531543	0.669434
1188	chr1	71892800	71894699	FALSE	Stable	3.50788	2.83794e-08	3.43413	2.8433e-09	-0.0957932	0.946635
1189	chr1	71896700	71896949	FALSE	Stable	1.36858	0.026102	4.12776	1.61867e-12	-0.188142	0.890766
1190	chr1	71899150	71899349	FALSE	Stable	1.36798	0.0261673	3.25306	1.67399e-08	-0.326482	0.80072
1193	chr1	72002100	72002449	FALSE	Stable	1.89547	0.00212129	3.71463	1.5885e-10	0.323471	0.80283
1194	chr1	72002700	72002849	FALSE	Stable	2.65006	2.0594e-05	3.85421	3.49735e-11	0.369683	0.774958
1195	chr1	72018750	72018849	FALSE	Stable	2.53791	4.40772e-05	3.0581	1.03852e-07	-0.520194	0.676448
1197	chr1	72038350	72038549	FALSE	Stable	3.61214	1.16953e-08	1.61374	0.0045443	-0.607232	0.609404
1198	chr1	72052300	72052649	FALSE	Stable	2.5767	3.4055e-05	1.9448	0.000633794	-0.402324	0.754104
1199	chr1	72052850	72052999	FALSE	Stable	1.63309	0.00800875	2.39961	2.60524e-05	-0.380564	0.768321
1200	chr1	72059750	72061599	FALSE	Stable	3.89434	9.36031e-10	4.01044	6.20785e-12	0.0139855	0.992083
1202	chr1	72107550	72107799	FALSE	Stable	2.65348	2.01327e-05	1.8479	0.00116528	0.0376397	0.980991
1203	chr1	72108100	72108299	FALSE	Stable	1.57568	0.0104769	2.28662	6.05714e-05	-0.158517	0.909086
1205	chr1	72109950	72110049	FALSE	Stable	3.08966	8.3259e-07	1.74286	0.00218617	0.33436	0.795552
1206	chr1	72198250	72198399	FALSE	Stable	1.85331	0.00265223	2.60321	5.28298e-06	-0.363943	0.778796
1207	chr1	72225700	72226399	FALSE	Stable	4.28804	2.17209e-11	4.18801	8.04865e-13	0.617051	0.601501
1208	chr1	72236500	72237099	FALSE	Stable	4.83893	7.00428e-14	4.73943	9.7945e-16	0.547102	0.658501
1209	chr1	72243500	72244449	TRUE	Stable	5.40061	1.43434e-16	4.9754	4.75154e-17	0.50576	0.68662
1210	chr1	72254550	72255349	TRUE	Stable	4.7767	1.34369e-13	5.06412	1.37894e-17	0.600438	0.614722
1211	chr1	72255800	72255949	FALSE	Stable	2.41546	9.83939e-05	3.46319	2.12621e-09	0.939744	0.312765
1212	chr1	72306550	72307899	TRUE	Stable	3.77849	2.68231e-09	3.53686	1.00745e-09	0.317281	0.806579
1213	chr1	72308200	72308349	FALSE	Stable	2.48136	6.41678e-05	1.78606	0.00169238	0.664154	0.560706
1214	chr1	72308800	72309799	FALSE	Stable	3.45026	4.61322e-08	2.04168	0.000336682	-0.115787	0.933763
1215	chr1	72309950	72310849	FALSE	Stable	3.25378	2.29192e-07	3.98364	8.38154e-12	-0.0665389	0.964165
1216	chr1	72456800	72456999	FALSE	Stable	2.33014	0.000169033	1.60035	0.00489681	-0.718074	0.511999
1217	chr1	72567250	72567449	FALSE	Stable	1.96165	0.00148312	1.50458	0.00817046	0.429386	0.736933
1218	chr1	72577100	72577299	FALSE	Stable	2.53968	4.35836e-05	1.68564	0.00304343	0.822892	0.415705
1219	chr1	72578450	72578549	FALSE	Stable	1.72825	0.00502695	2.16368	0.00014608	1.13841	0.17212
1220	chr1	72583250	72583349	FALSE	Stable	2.72412	1.23352e-05	1.72169	0.00247088	0.557654	0.649719
1222	chr1	72711050	72712049	FALSE	Stable	3.77817	2.68959e-09	3.03642	1.26923e-07	0.460969	0.718195
1226	chr1	72805650	72805999	FALSE	Stable	1.33961	0.0294291	2.53652	9.01526e-06	-0.358299	0.782027
1227	chr1	72806450	72806749	FALSE	Stable	2.1571	0.000485257	2.81978	8.63794e-07	-0.475279	0.708327
1228	chr1	72823800	72824249	FALSE	Stable	3.35869	9.83495e-08	2.62403	4.46393e-06	0.437591	0.732487
1229	chr1	72824800	72824949	FALSE	Stable	1.35859	0.0272136	2.00098	0.000440705	-0.262646	0.840267
1230	chr1	72826650	72827149	FALSE	Stable	2.65944	1.9369e-05	4.50085	1.94916e-14	-0.282813	0.827339
1232	chr1	72945700	72945999	FALSE	Stable	3.10846	7.1972e-07	1.38871	0.0146696	-0.117198	0.932905
1233	chr1	72952700	72953199	FALSE	Stable	1.72181	0.0051945	2.59025	5.88703e-06	0.0947798	0.947289
1234	chr1	72953450	72953999	FALSE	Stable	2.69393	1.52278e-05	2.8018	1.0082e-06	-0.00786517	0.996051
1235	chr1	72963150	72963499	FALSE	Stable	3.85081	1.39859e-09	1.71074	0.00263252	0.231942	0.862127
1236	chr1	73026550	73026649	FALSE	Stable	1.98828	0.00128001	1.90807	0.000800192	0.0594305	0.968705
1237	chr1	73045900	73046199	FALSE	Stable	2.56344	3.72808e-05	2.28662	6.05714e-05	1.41328	0.0591373
1239	chr1	73054050	73054199	FALSE	Stable	2.59147	3.07647e-05	1.30593	0.0217638	0.675686	0.550758
1240	chr1	73251250	73252249	TRUE	Stable	3.3727	8.74504e-08	3.14934	4.47683e-08	-0.0373672	0.981183
1241	chr1	73252450	73252749	TRUE	Stable	2.72493	1.22641e-05	2.21666	0.000100704	0.0576152	0.969927
1244	chr1	73361950	73362149	FALSE	Stable	2.34013	0.000158921	2.72248	1.97965e-06	-0.992203	0.270934
1245	chr1	73362500	73364849	TRUE	Stable	3.60654	1.22626e-08	3.68077	2.27104e-10	-0.28444	0.826855
1246	chr1	73365000	73365149	FALSE	Stable	1.30623	0.0337288	2.50335	1.17078e-05	-0.907164	0.340299
1249	chr1	73514100	73514249	FALSE	Stable	1.46215	0.0174837	1.98357	0.000494078	-1.13128	0.176528
1250	chr1	73538400	73538499	FALSE	Stable	3.08598	8.54831e-07	2.24582	8.16551e-05	-0.172274	0.900777
1251	chr1	73538800	73539249	FALSE	Stable	2.2561	0.000268234	2.29296	5.78656e-05	-0.556909	0.650343
1252	chr1	73618200	73618299	FALSE	Stable	1.76998	0.00407871	1.89501	0.000867737	-1.13747	0.172593
1253	chr1	73743700	73743799	FALSE	Stable	2.88653	3.84344e-06	1.42789	0.0120867	0.108527	0.938603
1254	chr1	73743950	73744099	FALSE	Stable	2.40416	0.000105617	2.75951	1.44912e-06	0.0306051	0.984798
1255	chr1	73744200	73744849	FALSE	Stable	3.45355	4.49464e-08	3.52599	1.12464e-09	0.543177	0.660979
1256	chr1	73745000	73745099	FALSE	Stable	1.73567	0.00484319	2.21475	0.000102073	0.490432	0.696923
1257	chr1	73745150	73745249	FALSE	Stable	2.79006	7.72768e-06	2.96013	2.52542e-07	-0.190845	0.88917
1258	chr1	73757450	73759699	FALSE	Stable	3.37103	8.87316e-08	2.1988	0.000114249	0.961775	0.294305
1260	chr1	73837600	73837799	FALSE	Stable	1.24636	0.0426959	3.65142	3.12141e-10	-0.432122	0.735407
1261	chr1	73862200	73863149	FALSE	Stable	2.89824	3.51999e-06	2.31168	5.04844e-05	0.395226	0.758816
1263	chr1	73864000	73864399	FALSE	Stable	3.34375	1.10513e-07	2.09679	0.000231915	0.405819	0.751393
1265	chr1	73941800	73942099	FALSE	Stable	2.58438	3.22865e-05	1.91544	0.000763693	0.411374	0.748163
1266	chr1	73942300	73943099	FALSE	Stable	3.46155	4.1946e-08	1.81194	0.00144983	0.74838	0.483282
1267	chr1	73948300	73948499	FALSE	Stable	2.51658	5.0808e-05	2.49316	1.26908e-05	0.998463	0.265511
1268	chr1	73949250	73949349	FALSE	Stable	1.45154	0.0183095	2.05628	0.000305502	0.370297	0.774439
1269	chr1	73963400	73963549	FALSE	Stable	2.62891	2.38721e-05	1.83143	0.00128863	0.18762	0.891024
1270	chr1	73970700	73970849	FALSE	Stable	1.77196	0.00404355	2.56063	7.4441e-06	0.769927	0.463016
1271	chr1	74000150	74000349	FALSE	Stable	1.87278	0.00239776	1.82013	0.00138037	0.342602	0.790533
1272	chr1	74000450	74000749	FALSE	Stable	2.68047	1.67134e-05	2.81894	8.69919e-07	0.83657	0.402556
1273	chr1	74001150	74001499	FALSE	Stable	3.01493	1.46977e-06	1.69475	0.00288845	0.965886	0.291466
1274	chr1	74027300	74028099	FALSE	Stable	3.4702	3.90353e-08	1.8229	0.00135697	0.549302	0.656055
1276	chr1	74030350	74031149	FALSE	Stable	1.84397	0.00278773	3.58754	6.00529e-10	0.11218	0.936168
1277	chr1	74031450	74031949	FALSE	Stable	2.82662	5.92867e-06	2.55713	7.6607e-06	0.0944056	0.947446
1278	chr1	74032050	74032349	FALSE	Stable	1.58711	0.0099321	3.15343	4.30137e-08	0.27639	0.831828
1279	chr1	74040650	74043349	TRUE	Stable	3.98688	3.96815e-10	3.52523	1.13409e-09	0.365457	0.77778
1280	chr1	74043400	74043649	FALSE	Stable	2.66193	1.90481e-05	2.21646	0.000100835	0.41226	0.747768
1281	chr1	74043750	74043899	FALSE	Stable	1.87278	0.00239776	1.92453	0.000721364	0.655295	0.568667
1283	chr1	74052150	74052349	FALSE	Stable	3.20441	3.39503e-07	2.49227	1.27831e-05	0.691365	0.536286
1284	chr1	74053050	74053149	FALSE	Stable	2.22775	0.000318142	2.16815	0.000141622	0.0319176	0.98436
1285	chr1	74053850	74053949	FALSE	Stable	1.89728	0.00209992	2.91773	3.68388e-07	-0.0454111	0.976271
1286	chr1	74054250	74054399	FALSE	Stable	2.62891	2.38721e-05	2.13103	0.00018365	-0.111982	0.936297
1287	chr1	74089850	74090199	FALSE	Stable	2.98452	1.85277e-06	2.44182	1.88769e-05	0.188397	0.890466
1288	chr1	74090450	74093149	TRUE	Stable	4.2208	4.24238e-11	3.6893	2.08756e-10	0.112388	0.935968
1290	chr1	74104300	74104449	FALSE	Stable	1.52909	0.0129666	2.47475	1.46587e-05	0.612936	0.604639
1291	chr1	74111250	74111399	FALSE	Stable	2.65453	1.99998e-05	1.87633	0.000975951	-0.248754	0.850192
1292	chr1	74232000	74232149	FALSE	Stable	2.61322	2.65238e-05	2.96287	2.46222e-07	-1.36209	0.0744316
1293	chr1	74236550	74237449	FALSE	Stable	3.42687	5.60388e-08	3.54398	9.40439e-10	0.465622	0.714304
1295	chr1	74249200	74249399	FALSE	Stable	2.2086	0.000357486	3.51508	1.259e-09	-0.331441	0.797737
1296	chr1	74284400	74284699	FALSE	Stable	1.48559	0.0157833	2.61036	4.99268e-06	0.011685	0.993624
1297	chr1	74295900	74295999	FALSE	Stable	3.6975	5.52587e-09	1.45817	0.0103795	0.220719	0.870613
1298	chr1	74357050	74357199	FALSE	Stable	3.44728	4.73213e-08	1.36894	0.0161463	0.0483079	0.974945
1299	chr1	74357350	74357799	FALSE	Stable	2.04029	0.000954348	2.87506	5.35007e-07	-0.0214857	0.988759
1300	chr1	74358400	74358899	FALSE	Stable	2.31778	0.000182983	2.86525	5.83513e-07	0.226942	0.865913
1301	chr1	74386550	74387499	TRUE	Stable	4.53235	1.77157e-12	3.60353	5.10892e-10	0.082543	0.955121
1302	chr1	74391200	74391699	TRUE	Stable	2.46343	7.22454e-05	2.52302	1.00082e-05	-0.0959098	0.946517
1303	chr1	74391750	74392399	TRUE	Stable	4.63486	6.20699e-13	4.15692	1.16572e-12	0.117563	0.932693
1304	chr1	74396650	74397399	FALSE	Stable	4.31714	1.61785e-11	3.4835	1.73649e-09	0.0586906	0.969214
1305	chr1	74397550	74398349	FALSE	Stable	3.13831	5.7082e-07	2.45282	1.73707e-05	0.17717	0.898075
1306	chr1	74505500	74505749	FALSE	Stable	2.1158	0.000617963	2.27959	6.38164e-05	0.314479	0.808308
1307	chr1	74505950	74507299	TRUE	Stable	4.73299	2.11246e-13	4.45692	3.31776e-14	0.347209	0.788377
1308	chr1	74507350	74507549	FALSE	Stable	2.01335	0.00111214	1.39001	0.0145767	0.587759	0.625883
1309	chr1	74587300	74587549	TRUE	Stable	2.13316	0.000560197	1.82551	0.00133621	0.634109	0.586757
1310	chr1	74587600	74588049	TRUE	Stable	3.24549	2.44874e-07	2.42835	2.09798e-05	0.516342	0.679279
1311	chr1	74601100	74601249	FALSE	Stable	1.42577	0.0204853	1.22252	0.0317873	0.168657	0.903265
1312	chr1	74601550	74601749	FALSE	Stable	3.00359	1.60321e-06	2.11354	0.000206883	-0.460063	0.718668
1313	chr1	74661700	74662699	FALSE	Stable	3.77773	2.7002e-09	3.38158	4.79562e-09	0.427075	0.738445
1314	chr1	74712750	74713199	FALSE	Stable	3.32063	1.3349e-07	2.33693	4.18608e-05	0.169056	0.902967
1315	chr1	74713250	74713999	FALSE	Stable	3.24484	2.45716e-07	3.23242	2.03981e-08	0.236535	0.859393
1316	chr1	74714950	74716399	FALSE	Stable	3.55521	1.90347e-08	3.3849	4.65161e-09	-0.132348	0.924548
1317	chr1	74716850	74717049	FALSE	Stable	1.74801	0.00454789	2.70563	2.2796e-06	0.0174113	0.990353
1318	chr1	74816750	74816899	FALSE	Stable	2.34206	0.000157077	2.0392	0.000342124	1.0099	0.256877
1319	chr1	74817100	74817599	FALSE	Stable	2.57284	3.49058e-05	2.90536	4.10663e-07	-0.0802491	0.95638
1321	chr1	75124250	75125449	TRUE	Stable	4.10885	1.23783e-10	3.11482	6.15178e-08	0.398116	0.756729
1323	chr1	75142350	75142749	FALSE	Stable	2.54279	4.28169e-05	3.14867	4.5073e-08	-0.127601	0.92707
1324	chr1	75142800	75143049	FALSE	Stable	2.53044	4.6413e-05	2.32446	4.59378e-05	0.169087	0.902926
1325	chr1	75168850	75168949	FALSE	Stable	1.91474	0.00191039	2.93649	3.12048e-07	-0.0300914	0.985074
1327	chr1	75210850	75211149	FALSE	Stable	2.8056	6.90215e-06	2.56774	7.04176e-06	0.425262	0.739735
1328	chr1	75236100	75236249	FALSE	Stable	2.2933	0.00021339	2.94492	2.89361e-07	-0.0902168	0.950201
1329	chr1	75236500	75236849	FALSE	Stable	2.73443	1.14722e-05	2.71988	2.02169e-06	0.394291	0.759219
1330	chr1	75237050	75237199	FALSE	Stable	2.89309	3.65469e-06	1.14541	0.0442881	0.397565	0.757274
1331	chr1	75316700	75316799	FALSE	Stable	2.44144	8.31713e-05	1.6144	0.00452829	0.382258	0.767388
1332	chr1	75317050	75317499	FALSE	Stable	4.5039	2.39661e-12	2.16905	0.000140797	0.564452	0.644929
1333	chr1	75318150	75318449	FALSE	Stable	2.93087	2.761e-06	2.26155	7.30391e-05	0.634722	0.586332
1334	chr1	75343800	75344299	FALSE	Stable	2.38995	0.000115777	3.15168	4.37427e-08	-0.0206976	0.989222
1335	chr1	75344400	75345299	FALSE	Stable	3.75313	3.36889e-09	2.55637	7.70839e-06	0.23225	0.861983
1337	chr1	75399500	75399949	TRUE	Stable	1.9057	0.00200745	2.68343	2.7452e-06	0.0608777	0.967665
1338	chr1	75400200	75400799	TRUE	Stable	2.70946	1.36891e-05	2.20566	0.000108832	0.0511934	0.973681
1339	chr1	75478850	75479299	FALSE	Stable	2.99057	1.77066e-06	2.20508	0.000109296	0.484688	0.701253
1340	chr1	75505600	75506799	FALSE	Stable	4.16362	7.35444e-11	3.61974	4.32758e-10	0.449505	0.725585
1341	chr1	75511300	75511449	FALSE	Stable	2.50966	5.32544e-05	2.1063	0.000217605	0.0490647	0.974532
1342	chr1	75511800	75512149	FALSE	Stable	3.09376	8.0708e-07	2.04136	0.000337447	-0.469411	0.71228
1343	chr1	75520650	75521899	TRUE	Stable	4.5937	9.39864e-13	3.30662	9.99782e-09	0.189081	0.890042
1344	chr1	75546100	75546799	FALSE	Stable	3.12382	6.38844e-07	3.77182	8.58739e-11	-0.169722	0.902398
1345	chr1	75559050	75559499	FALSE	Stable	2.02659	0.00103241	2.67377	2.97249e-06	-0.154136	0.911369
1346	chr1	75581100	75582149	FALSE	Stable	3.42672	5.61161e-08	2.25124	7.85629e-05	1.13743	0.172593
1347	chr1	75582250	75582749	FALSE	Stable	3.16903	4.48465e-07	2.67092	3.04405e-06	1.11373	0.187894
1349	chr1	75652950	75653749	FALSE	Stable	3.45368	4.48915e-08	1.61971	0.00440127	0.65777	0.565956
1350	chr1	75653800	75654049	FALSE	Stable	4.02401	2.78061e-10	2.29484	5.70696e-05	0.37906	0.769149
1351	chr1	75654250	75654549	FALSE	Stable	2.52183	4.90739e-05	1.5689	0.00580996	0.695357	0.532487
1352	chr1	75655100	75655249	FALSE	Stable	2.30696	0.000195568	1.92406	0.000722968	0.362129	0.77976
1354	chr1	75693000	75693449	FALSE	Stable	4.33805	1.31804e-11	1.60646	0.0047335	-0.206762	0.878708
1355	chr1	75694000	75694099	FALSE	Stable	1.23055	0.0454211	1.1706	0.0398369	0.0253594	0.986836
1356	chr1	75695400	75695549	FALSE	Stable	2.5017	5.6194e-05	1.55955	0.00611508	0.174213	0.899525
1357	chr1	75738050	75738799	FALSE	Stable	2.00717	0.00115087	3.72418	1.43607e-10	-0.0165912	0.990694
1359	chr1	75743700	75743899	FALSE	Stable	3.46326	4.13522e-08	2.10692	0.000216667	0.343899	0.790098
1361	chr1	75750200	75750299	FALSE	Stable	1.35615	0.0274847	1.55811	0.00616312	0.184001	0.893385
1363	chr1	75770100	75770349	FALSE	Stable	2.70741	1.38827e-05	2.00159	0.000439007	1.09178	0.201436
1365	chr1	75770950	75771099	FALSE	Stable	1.94396	0.0016313	2.72139	1.99722e-06	0.5187	0.677181
1368	chr1	75771750	75773099	FALSE	Stable	4.06741	1.84362e-10	2.96246	2.47118e-07	0.949627	0.304832
1369	chr1	75773350	75773599	FALSE	Stable	2.54619	4.19743e-05	2.19955	0.000113618	-0.00766826	0.996175
1370	chr1	75773750	75774099	FALSE	Stable	2.6911	1.55195e-05	1.94784	0.000621346	1.22153	0.128237
1372	chr1	75778800	75779249	FALSE	Stable	5.098	4.3064e-15	2.63551	4.0767e-06	0.443878	0.728381
1375	chr1	75784300	75784499	FALSE	Stable	2.52795	4.7222e-05	1.50188	0.00828786	0.671775	0.554778
1376	chr1	75784550	75784749	FALSE	Stable	1.33598	0.0298607	3.95736	1.11927e-11	0.363997	0.778796
1378	chr1	75785500	75786449	FALSE	Stable	4.94664	2.25804e-14	2.96389	2.4409e-07	0.944895	0.308441
1379	chr1	75786550	75787599	FALSE	Stable	3.68118	6.40136e-09	3.07841	8.64819e-08	1.0938	0.199996
1380	chr1	75788050	75788699	FALSE	Stable	3.18728	3.88106e-07	1.60134	0.0048705	1.00695	0.259241
1381	chr1	75788800	75789499	FALSE	Stable	2.51492	5.13907e-05	2.70622	2.26962e-06	0.472013	0.710153
1382	chr1	75803150	75803299	FALSE	Stable	3.43082	5.41806e-08	2.79657	1.05457e-06	0.0243934	0.987369
1383	chr1	75803550	75804099	FALSE	Stable	2.74744	1.04613e-05	3.32433	8.44443e-09	0.292708	0.82266
1384	chr1	75804200	75804449	FALSE	Stable	2.24538	0.000285709	3.30131	1.05406e-08	0.32793	0.800042
1385	chr1	75804900	75805149	FALSE	Stable	3.59168	1.39161e-08	2.40413	2.51656e-05	0.160602	0.907943
1387	chr1	75818750	75818849	FALSE	Stable	1.92054	0.0018563	2.88045	5.11204e-07	-0.959908	0.295757
1388	chr1	75831900	75834649	TRUE	Stable	4.30734	1.78387e-11	3.43086	2.93115e-09	0.45131	0.724286
1389	chr1	75839350	75839599	FALSE	Stable	2.32808	0.00017123	2.85006	6.67868e-07	0.669529	0.556685
1392	chr1	75844900	75845049	FALSE	Stable	2.10529	0.000657383	1.78798	0.00167356	0.703265	0.525767
1393	chr1	75885300	75885599	FALSE	Stable	3.66489	7.40172e-09	1.63036	0.0041498	0.684414	0.543565
1394	chr1	75888800	75889699	FALSE	Stable	4.12209	1.09272e-10	2.80724	9.6147e-07	0.794801	0.441476
1395	chr1	75890050	75890349	FALSE	Stable	2.81035	6.66989e-06	1.79649	0.00159127	0.493819	0.69455
1396	chr1	75891200	75891349	FALSE	Stable	2.75385	1.00053e-05	1.95352	0.000598552	0.35555	0.783344
1397	chr1	75926250	75926449	FALSE	Stable	3.4552	4.4318e-08	1.92348	0.000725525	0.504771	0.687254
1398	chr1	75979800	75979999	FALSE	Stable	2.40633	0.000104169	2.66736	3.13445e-06	-0.281806	0.827965
1399	chr1	75981000	75981349	FALSE	Stable	3.22921	2.77968e-07	3.10849	6.53489e-08	0.682114	0.545198
1400	chr1	75982000	75983099	FALSE	Stable	3.77197	2.84918e-09	2.87719	5.25753e-07	1.15579	0.162462
1402	chr1	75983750	75984749	FALSE	Stable	4.15071	8.26505e-11	3.90144	2.09479e-11	1.01797	0.251261
1403	chr1	75984900	75985049	FALSE	Stable	3.40559	6.65649e-08	1.63561	0.00403289	0.419858	0.742726
1404	chr1	75985200	75985799	FALSE	Stable	3.43086	5.41806e-08	2.72481	1.94334e-06	0.448475	0.725842
1406	chr1	75999950	76000049	FALSE	Stable	1.6618	0.00696928	2.81091	9.31433e-07	-0.157445	0.909465
1407	chr1	76008200	76008449	FALSE	Stable	2.66907	1.81424e-05	1.71847	0.00251823	0.332449	0.797001
1408	chr1	76008850	76009749	TRUE	Stable	4.03009	2.63099e-10	2.8014	1.01195e-06	0.315241	0.80782
1409	chr1	76009850	76011149	TRUE	Stable	3.75223	3.3957e-09	4.11839	1.80117e-12	0.388183	0.763209
1410	chr1	76011200	76011399	FALSE	Stable	2.17364	0.000440398	2.95363	2.67254e-07	0.186771	0.891478
1411	chr1	76011700	76011899	FALSE	Stable	3.18273	4.01989e-07	1.41094	0.0131553	0.323924	0.802471
1412	chr1	76021500	76021799	FALSE	Stable	1.96148	0.00148388	2.9797	2.11751e-07	-0.0431845	0.977541
1413	chr1	76030900	76031699	FALSE	Stable	3.34805	1.07045e-07	3.14541	4.65254e-08	0.625179	0.594189
1414	chr1	76032200	76032349	FALSE	Stable	1.70875	0.00553926	1.47823	0.00937164	-0.123781	0.929485
1415	chr1	76039550	76040049	FALSE	Stable	3.04816	1.14959e-06	1.69011	0.00296786	-0.356625	0.782927
1418	chr1	76050600	76050799	FALSE	Stable	2.69132	1.54933e-05	1.4438	0.0111522	0.479579	0.705195
1420	chr1	76064800	76064949	FALSE	Stable	1.91591	0.00190028	1.9373	0.000664131	-0.0490709	0.974532
1421	chr1	76065150	76065499	FALSE	Stable	1.83548	0.00291092	2.60769	5.1033e-06	-0.15658	0.910147
1422	chr1	76065550	76065699	FALSE	Stable	2.52472	4.81471e-05	1.77445	0.00181364	-0.0176726	0.990158
1423	chr1	76066000	76066549	FALSE	Stable	2.85592	4.81077e-06	2.60907	5.04582e-06	-0.294294	0.821992
1426	chr1	76080500	76080649	FALSE	Stable	4.44687	4.32956e-12	1.53215	0.00706555	0.896101	0.349292
1427	chr1	76106700	76106849	FALSE	Stable	1.36772	0.0261902	2.46434	1.58763e-05	-0.121583	0.930533
1428	chr1	76108100	76108249	FALSE	Stable	1.86762	0.00246047	2.4116	2.37953e-05	-0.575126	0.636592
1429	chr1	76138050	76138399	FALSE	Stable	4.04005	2.40095e-10	2.59787	5.52423e-06	0.832323	0.406543
1436	chr1	76535400	76536299	FALSE	Stable	2.13492	0.000554536	3.11985	5.87761e-08	-0.160857	0.907864
1437	chr1	76547700	76547949	FALSE	Stable	3.51294	2.7138e-08	3.00087	1.75279e-07	-0.0977864	0.945156
1438	chr1	76548350	76548649	FALSE	Stable	3.20441	3.39503e-07	3.73053	1.34205e-10	-0.546895	0.658501
1443	chr1	76831950	76832149	FALSE	Stable	2.82927	5.81347e-06	1.83808	0.00123828	0.223248	0.868708
1444	chr1	76842800	76842949	FALSE	Stable	1.35	0.0281957	2.30617	5.25416e-05	0.339952	0.792296
1445	chr1	76843850	76844249	FALSE	Stable	3.42992	5.45944e-08	1.72944	0.00236397	0.401363	0.754499
1446	chr1	76864400	76864649	FALSE	Stable	2.65357	2.01327e-05	2.49657	1.23665e-05	0.12586	0.928193
1447	chr1	76865000	76865399	FALSE	Stable	3.30212	1.55049e-07	1.32961	0.0194817	0.202107	0.881493
1448	chr1	76865550	76866199	FALSE	Stable	3.15106	5.16086e-07	2.15094	0.000159708	0.793534	0.442345
1449	chr1	76866400	76867099	FALSE	Stable	3.81626	1.91659e-09	2.56964	6.93986e-06	0.431964	0.735559
1452	chr1	76895400	76897299	FALSE	Stable	4.79825	1.08567e-13	3.7634	9.40494e-11	0.611579	0.606168
1453	chr1	76905550	76905799	FALSE	Stable	3.25408	2.28635e-07	2.12421	0.00019229	0.685094	0.543069
1454	chr1	76905900	76907899	FALSE	Stable	3.10713	7.27712e-07	2.69963	2.39722e-06	0.331396	0.797753
1455	chr1	76908000	76908599	FALSE	Stable	3.10453	7.43072e-07	2.63639	4.0474e-06	0.430103	0.736479
1456	chr1	76957050	76957299	FALSE	Stable	2.20514	0.000364242	3.92459	1.62161e-11	-0.727789	0.503327
1458	chr1	76972300	76972599	FALSE	Stable	4.27112	2.56897e-11	1.73843	0.00224433	-0.0729419	0.960782
1459	chr1	76972800	76973199	FALSE	Stable	3.47353	3.79326e-08	2.02593	0.000373538	0.41027	0.749006
1460	chr1	76973250	76973449	FALSE	Stable	1.56652	0.0109353	2.39194	2.76661e-05	0.138583	0.920948
1462	chr1	76974000	76974199	FALSE	Stable	2.38216	0.000121787	3.29279	1.14436e-08	0.385493	0.764305
1463	chr1	76974350	76974549	FALSE	Stable	4.15985	7.61696e-11	1.92453	0.000721364	0.633802	0.587035
1464	chr1	76975050	76975499	FALSE	Stable	2.95575	2.29717e-06	1.82099	0.00137335	0.516609	0.679007
1465	chr1	76975700	76976149	FALSE	Stable	2.79008	7.72681e-06	1.7662	0.00190707	0.182746	0.894423
1466	chr1	77140500	77141149	FALSE	Stable	2.58543	3.20397e-05	3.42596	3.07908e-09	0.315188	0.80788
1467	chr1	77141750	77141949	FALSE	Stable	2.83971	5.40805e-06	1.58165	0.00542271	0.639907	0.58204
1471	chr1	77220900	77221099	FALSE	Stable	1.28281	0.0370391	4.80293	4.38067e-16	-0.365054	0.777958
1474	chr1	77255100	77255249	FALSE	Stable	1.98291	0.00131862	2.78139	1.20259e-06	0.982115	0.279076
1475	chr1	77255500	77256099	FALSE	Stable	3.55363	1.92946e-08	2.01403	0.000403943	1.01611	0.252777
1476	chr1	77256300	77258999	FALSE	Stable	4.35891	1.06696e-11	3.34639	6.79409e-09	0.73116	0.500162
1477	chr1	77259450	77259599	FALSE	Stable	2.62891	2.38721e-05	1.33309	0.0191679	1.27504	0.105571
1478	chr1	77274700	77274899	FALSE	Stable	4.37265	9.24939e-12	1.64822	0.00375755	1.1229	0.181693
1479	chr1	77289950	77290099	FALSE	Stable	3.93962	6.16182e-10	1.16757	0.0403457	0.753434	0.478662
1482	chr1	77388100	77389299	FALSE	Stable	3.39111	7.51222e-08	3.3767	5.02931e-09	0.0531642	0.972579
1483	chr1	77389500	77389599	FALSE	Stable	3.01272	1.49462e-06	2.15626	0.000153789	0.246599	0.851966
1484	chr1	77403900	77404049	FALSE	Stable	2.09986	0.000678507	2.25269	7.7704e-05	0.233123	0.861427
1485	chr1	77404300	77404449	FALSE	Stable	2.36919	0.000132486	1.53215	0.00706555	1.12699	0.179166
1486	chr1	77494500	77495849	FALSE	Stable	2.23085	0.00031243	3.21295	2.46003e-08	-0.36278	0.779335
1487	chr1	77496000	77496649	FALSE	Stable	2.05436	0.000884027	2.90553	4.10052e-07	-0.348807	0.78766
1488	chr1	77496850	77496949	FALSE	Stable	1.61103	0.00887317	2.84761	6.80363e-07	-0.675182	0.551216
1489	chr1	77512550	77513699	FALSE	Stable	3.00813	1.54934e-06	2.60178	5.34593e-06	0.144575	0.917121
1490	chr1	77513850	77515099	FALSE	Stable	3.18664	3.90171e-07	3.81311	5.49975e-11	-0.109443	0.937823
1491	chr1	77515300	77516349	TRUE	Stable	3.97106	4.60151e-10	3.0623	1.00083e-07	0.329761	0.798865
1492	chr1	77728100	77728299	FALSE	Stable	2.59354	3.03571e-05	1.48698	0.00896263	0.0796044	0.956568
1493	chr1	77728350	77728549	FALSE	Stable	3.84637	1.45921e-09	2.19231	0.000119555	0.0525454	0.973042
1494	chr1	78021600	78022399	FALSE	Stable	3.07848	9.06297e-07	1.80916	0.00147448	0.401157	0.754504
1496	chr1	78081100	78081249	FALSE	Stable	2.41714	9.75457e-05	3.06551	9.71657e-08	0.343292	0.790384
1497	chr1	78082150	78082299	FALSE	Stable	1.58683	0.00994386	3.14543	4.65204e-08	0.428881	0.73731
1498	chr1	78082550	78082799	FALSE	Stable	1.71874	0.00527363	3.33409	7.67753e-09	-0.640317	0.581456
1499	chr1	78083150	78083299	FALSE	Stable	1.85367	0.00264757	1.36285	0.0166291	0.459681	0.719039
1500	chr1	78188750	78189199	TRUE	Stable	1.82501	0.00307339	3.66141	2.8065e-10	-0.277795	0.830836
1501	chr1	78190050	78190299	FALSE	Stable	2.45441	7.64839e-05	3.00224	1.73216e-07	0.0135707	0.992458
1504	chr1	78442600	78443299	FALSE	Stable	2.78129	8.24232e-06	3.04349	1.18887e-07	-0.108235	0.938726
1505	chr1	78443550	78443749	FALSE	Stable	2.53634	4.45393e-05	3.20812	2.57649e-08	-0.69946	0.528693
1506	chr1	78444150	78444299	FALSE	Stable	2.69132	1.54933e-05	2.63401	4.1241e-06	0.0365388	0.981607
1508	chr1	78488600	78489549	TRUE	Stable	3.97279	4.52967e-10	3.77956	7.92351e-11	0.28488	0.82673
1509	chr1	78538900	78538999	FALSE	Stable	2.6814	1.66035e-05	2.0607	0.000296586	0.620697	0.598338
1511	chr1	78656300	78658699	FALSE	Stable	4.49128	2.72718e-12	3.64209	3.43852e-10	0.463538	0.715964
1512	chr1	78658750	78658999	FALSE	Stable	2.80458	6.95167e-06	1.59018	0.00517572	0.956835	0.298625
1517	chr1	79183600	79183799	TRUE	Stable	2.86343	4.55378e-06	3.13543	5.08464e-08	-0.292773	0.82266
1518	chr1	79184250	79184799	TRUE	Stable	2.72466	1.22889e-05	3.74224	1.18662e-10	0.366272	0.777354
1520	chr1	79314150	79314299	FALSE	Stable	2.48362	6.32976e-05	3.59411	5.63415e-10	-0.118829	0.932117
1521	chr1	79314400	79314749	FALSE	Stable	2.92191	2.95826e-06	2.4274	2.11407e-05	-0.0255361	0.986688
1522	chr1	79315000	79315349	FALSE	Stable	3.17495	4.27711e-07	1.43618	0.011596	0.534281	0.667204
1523	chr1	79332950	79333199	FALSE	Stable	3.59492	1.35206e-08	1.9006	0.00083811	0.681881	0.54534
1527	chr1	79761900	79762049	FALSE	Stable	3.35134	1.04124e-07	1.6477	0.003768	0.67668	0.549973
1528	chr1	79776050	79776599	FALSE	Stable	3.34626	1.0863e-07	2.93888	3.05879e-07	0.370488	0.774439
1529	chr1	79832250	79832749	FALSE	Stable	2.54434	4.23943e-05	2.82414	8.3099e-07	-0.508465	0.684416
1530	chr1	79833200	79833599	FALSE	Stable	3.29407	1.65569e-07	2.81937	8.66922e-07	-0.366434	0.777354
1531	chr1	79858100	79859449	FALSE	Stable	4.45868	3.83747e-12	3.01125	1.59565e-07	0.344399	0.789791
1532	chr1	79861500	79861799	FALSE	Stable	2.54849	4.13851e-05	2.15231	0.000158136	0.138604	0.920943
1533	chr1	79862000	79862099	FALSE	Stable	2.6814	1.66035e-05	1.39041	0.014549	-0.310534	0.811088
1536	chr1	79978400	79979449	FALSE	Stable	2.7565	9.82332e-06	3.44315	2.61477e-09	-0.345878	0.788984
1537	chr1	79982250	79982849	FALSE	Stable	2.8443	5.23053e-06	2.99975	1.76935e-07	-0.193758	0.887224
1539	chr1	80013600	80013899	FALSE	Stable	1.66468	0.00687506	3.31744	8.97508e-09	-0.0941639	0.947542
1540	chr1	80014100	80015149	FALSE	Stable	2.67883	1.69014e-05	3.78574	7.40817e-11	-0.322662	0.80331
1541	chr1	80015200	80015399	FALSE	Stable	3.38491	7.88414e-08	2.15547	0.000154668	-0.607511	0.609301
1542	chr1	80060850	80061949	FALSE	Stable	3.13097	6.06513e-07	2.85583	6.35062e-07	0.00139196	0.999121
1543	chr1	80062100	80062949	FALSE	Stable	2.7557	9.8797e-06	3.49657	1.52906e-09	0.146986	0.915338
1545	chr1	80110900	80110999	FALSE	Stable	2.66188	1.90481e-05	1.56497	0.00593432	0.652131	0.570954
1546	chr1	80339600	80340749	FALSE	Stable	4.12973	1.01608e-10	4.04144	4.38918e-12	0.313688	0.808678
1547	chr1	80341100	80341499	FALSE	Stable	3.33647	1.17281e-07	2.7589	1.45714e-06	0.0575199	0.969927
1548	chr1	80630200	80630649	FALSE	Stable	3.56003	1.8254e-08	1.67933	0.00315768	0.848899	0.391198
1549	chr1	80656600	80656749	FALSE	Stable	1.88191	0.00228212	1.55317	0.00632313	0.295535	0.821216
1550	chr1	80656950	80657149	FALSE	Stable	3.18847	3.84233e-07	2.46856	1.53808e-05	0.699134	0.529101
1552	chr1	80659850	80660049	FALSE	Stable	3.69868	5.48077e-09	2.03587	0.000349689	0.0612893	0.967301
1554	chr1	80757250	80757549	FALSE	Stable	3.12937	6.13649e-07	2.70995	2.20024e-06	-0.190439	0.889509
1555	chr1	80758200	80758849	FALSE	Stable	2.36595	0.00013506	2.38121	3.00364e-05	-0.153454	0.911666
1557	chr1	80777100	80777599	FALSE	Stable	3.49821	3.08225e-08	2.83332	7.69935e-07	-0.749866	0.482081
1558	chr1	80777650	80778299	FALSE	Stable	2.57519	3.44008e-05	3.07192	9.18673e-08	-0.0491399	0.974492
1559	chr1	80778450	80778899	FALSE	Stable	3.18822	3.85014e-07	3.1204	5.85137e-08	-0.160839	0.907864
1562	chr1	80932250	80932549	FALSE	Stable	2.4208	9.51711e-05	2.52638	9.74053e-06	-0.126361	0.927755
1565	chr1	81578150	81578299	FALSE	Stable	3.78903	2.43863e-09	1.37278	0.0158582	0.397636	0.757274
1566	chr1	81588250	81588699	FALSE	Stable	2.75603	9.85661e-06	1.5815	0.00542706	1.13763	0.172567
1567	chr1	81608150	81608699	TRUE	Stable	2.82913	5.81941e-06	2.48885	1.31388e-05	0.497043	0.692543
1568	chr1	81609200	81609799	TRUE	Stable	3.87108	1.16158e-09	1.68166	0.00311618	0.774665	0.459135
1571	chr1	81738800	81738949	FALSE	Stable	2.20769	0.000358781	2.77394	1.28479e-06	0.425411	0.739643
1572	chr1	81742900	81743049	FALSE	Stable	1.75632	0.00436806	3.31819	8.9092e-09	0.425599	0.739404
1573	chr1	81743750	81744499	FALSE	Stable	3.50888	2.81235e-08	2.45115	1.76057e-05	0.471336	0.710673
1574	chr1	81744750	81746299	FALSE	Stable	3.89378	9.41001e-10	3.50618	1.38231e-09	0.511191	0.682709
1576	chr1	81912750	81913149	FALSE	Stable	2.72762	1.20272e-05	2.68102	2.80009e-06	0.234	0.860882
1577	chr1	81913250	81913349	FALSE	Stable	1.58683	0.00994386	2.42493	2.1506e-05	0.136944	0.921827
1578	chr1	81913500	81914799	FALSE	Stable	3.70091	5.37464e-09	2.47699	1.44105e-05	0.310481	0.811088
1579	chr1	81915950	81916049	FALSE	Stable	1.28582	0.0366117	1.81257	0.00144429	0.0346489	0.982932
1580	chr1	81916300	81916749	FALSE	Stable	2.23015	0.000313657	2.66662	3.15349e-06	0.179149	0.8968
1581	chr1	81917300	81917449	FALSE	Stable	2.18675	0.000406829	1.92348	0.000725525	0.553223	0.652981
1582	chr1	81917550	81917849	FALSE	Stable	2.16749	0.000456602	2.52692	9.70645e-06	0.0918225	0.949142
1588	chr1	82135300	82135599	FALSE	Stable	2.67001	1.80211e-05	2.9552	2.63571e-07	0.100766	0.943155
1589	chr1	82135650	82135799	FALSE	Stable	2.97356	2.0111e-06	1.41601	0.0128292	0.207436	0.878318
1590	chr1	82136200	82136949	FALSE	Stable	3.77551	2.75588e-09	2.5894	5.92877e-06	0.147854	0.91497
1595	chr1	82260800	82261249	TRUE	Stable	3.7797	2.65119e-09	1.46445	0.0100562	1.27957	0.103788
1599	chr1	82273200	82273549	FALSE	Stable	3.72542	4.3206e-09	2.58147	6.31579e-06	1.11626	0.185935
1600	chr1	82282700	82284299	TRUE	Stable	4.14697	8.56522e-11	3.22297	2.23122e-08	0.468943	0.712517
1602	chr1	82289900	82290099	FALSE	Stable	3.99525	3.66101e-10	1.71667	0.00254353	0.677055	0.549598
1603	chr1	82290500	82292099	TRUE	Stable	3.58709	1.45085e-08	2.97594	2.1902e-07	0.571461	0.639374
1607	chr1	82316150	82317149	FALSE	Stable	3.93546	6.41307e-10	3.10599	6.67725e-08	0.467873	0.713303
1609	chr1	82345050	82345149	FALSE	Stable	3.38716	7.73826e-08	1.34177	0.0184044	1.03296	0.240936
1610	chr1	82361350	82361449	FALSE	Stable	2.27587	0.000237292	1.37404	0.0157607	0.291973	0.823081
1614	chr1	82385800	82386049	FALSE	Stable	1.77152	0.00404861	3.58387	6.22903e-10	-0.820688	0.417916
1615	chr1	82472050	82472199	FALSE	Stable	1.98292	0.00131862	1.67162	0.0032976	-0.29856	0.819711
1616	chr1	82472400	82472749	FALSE	Stable	3.4375	5.12486e-08	2.15934	0.000150514	0.660006	0.564173
1617	chr1	82473150	82473649	FALSE	Stable	2.91789	3.04992e-06	1.99837	0.000448347	0.0361256	0.981926
1618	chr1	82545100	82545249	FALSE	Stable	1.54857	0.0118789	2.93649	3.12048e-07	0.599549	0.61557
1619	chr1	82724700	82725399	FALSE	Stable	4.64069	5.84563e-13	3.02556	1.39773e-07	0.478144	0.706362
1620	chr1	82839350	82839949	TRUE	Stable	3.69112	5.84346e-09	3.15921	4.07297e-08	0.761174	0.47105
1623	chr1	83159700	83160199	FALSE	Stable	3.99232	3.76288e-10	1.38744	0.0147608	0.569126	0.641005
1624	chr1	83169200	83169799	FALSE	Stable	2.71224	1.34111e-05	2.76496	1.38528e-06	0.134678	0.923413
1626	chr1	84147900	84148149	FALSE	Stable	2.5472	4.16941e-05	2.07773	0.000264089	0.441789	0.729388
1627	chr1	84185700	84185999	FALSE	Stable	2.80147	7.11419e-06	2.13244	0.000181925	0.0508722	0.973728
1628	chr1	84186150	84187299	TRUE	Stable	3.43259	5.34082e-08	3.33453	7.64481e-09	0.0591603	0.968791
1629	chr1	84187700	84187949	FALSE	Stable	2.40649	0.000104099	1.64693	0.00378472	-0.413841	0.747193
1630	chr1	84217700	84217899	FALSE	Stable	2.0473	0.000918156	3.40821	3.68368e-09	-0.369249	0.775246
1633	chr1	84536550	84536899	FALSE	Stable	2.27613	0.000237208	3.16287	3.9364e-08	-0.560279	0.647643
1634	chr1	84549100	84549349	TRUE	Stable	4.10427	1.29259e-10	2.80942	9.43546e-07	0.267903	0.83739
1635	chr1	84550200	84551099	TRUE	Stable	2.95938	2.23699e-06	3.58433	6.21425e-10	-0.55644	0.650691
1636	chr1	84838100	84840799	TRUE	Stable	3.72132	4.48454e-09	3.82032	5.10084e-11	0.171373	0.90133
1638	chr1	85793350	85794449	FALSE	Stable	4.01502	3.03999e-10	3.02661	1.38474e-07	0.480097	0.704909
1639	chr1	85894450	85896299	TRUE	Stable	4.50146	2.45582e-12	3.97097	9.60605e-12	0.121259	0.930749
1642	chr1	86015850	86016049	FALSE	Stable	2.87755	4.11231e-06	2.27026	6.85123e-05	0.162506	0.906909
1643	chr1	86060600	86060799	FALSE	Stable	2.40594	0.000104429	1.33251	0.0192194	0.305487	0.81406
1644	chr1	86060900	86061049	FALSE	Stable	3.90519	8.48878e-10	1.53844	0.00684305	0.765235	0.46772
1645	chr1	86061700	86061849	FALSE	Stable	2.45541	7.60398e-05	2.6722	3.01254e-06	1.35704	0.0759314
1646	chr1	86064150	86065199	TRUE	Stable	4.34353	1.24494e-11	3.91693	1.76508e-11	0.461239	0.717873
1648	chr1	86154350	86154599	FALSE	Stable	2.58692	3.17306e-05	1.53019	0.00714306	0.477737	0.706599
1649	chr1	86358350	86359449	FALSE	Stable	4.63395	6.2682e-13	3.93365	1.46612e-11	0.660777	0.563446
1650	chr1	86359700	86360599	FALSE	Stable	3.68577	6.1377e-09	3.21498	2.4112e-08	0.568793	0.64144
1651	chr1	86397550	86398099	FALSE	Stable	3.5258	2.4362e-08	2.82996	7.9279e-07	0.243226	0.854159
1652	chr1	86398150	86398249	FALSE	Stable	2.05193	0.000896574	3.21001	2.53431e-08	0.400528	0.754941
1653	chr1	86398550	86399049	FALSE	Stable	3.55512	1.90469e-08	1.93702	0.000665263	0.4447	0.727948
1655	chr1	86433450	86434399	FALSE	Stable	4.87889	4.65773e-14	5.01848	2.59073e-17	0.112687	0.935735
1656	chr1	86434550	86435749	FALSE	Stable	3.7855	2.51529e-09	3.72743	1.38587e-10	-0.0343895	0.982932
1657	chr1	86440150	86440249	FALSE	Stable	2.70702	1.39129e-05	3.52605	1.12416e-09	0.172631	0.900561
1658	chr1	86440700	86443649	TRUE	Stable	5.38333	1.71491e-16	5.3428	2.86121e-19	0.282475	0.827406
1659	chr1	86464100	86465349	FALSE	Stable	3.67721	6.61691e-09	4.4285	4.65313e-14	0.412044	0.747768
1660	chr1	86471950	86472249	FALSE	Stable	1.69401	0.0059543	2.28428	6.16508e-05	-0.210519	0.876607
1661	chr1	86472350	86472699	FALSE	Stable	3.46986	3.91527e-08	2.36738	3.3315e-05	0.38935	0.762502
1662	chr1	86472750	86472949	FALSE	Stable	2.09863	0.000683623	2.33447	4.26108e-05	0.215413	0.873835
1663	chr1	86486750	86488749	FALSE	Stable	4.23991	3.51178e-11	4.05311	3.85405e-12	0.224442	0.867726
1664	chr1	86502250	86505399	TRUE	Stable	4.36092	1.04528e-11	3.71599	1.56362e-10	0.43421	0.734122
1665	chr1	86509150	86510099	FALSE	Stable	3.35429	1.01692e-07	2.46892	1.53528e-05	0.714502	0.514881
1667	chr1	86524400	86526299	TRUE	Stable	5.41086	1.29299e-16	5.1033	8.55237e-18	0.267098	0.837886
1668	chr1	86526550	86528699	TRUE	Stable	4.73711	2.02471e-13	3.74087	1.20479e-10	0.486154	0.699758
1669	chr1	86582400	86582499	FALSE	Stable	2.25449	0.000270513	3.54173	9.60337e-10	0.286595	0.825445
1672	chr1	86703700	86704299	TRUE	Stable	3.26778	2.05025e-07	2.45291	1.73592e-05	0.569858	0.640493
1675	chr1	87035400	87035749	FALSE	Stable	2.00059	0.0011947	2.86153	6.03494e-07	-0.159683	0.908603
1676	chr1	87035900	87036749	FALSE	Stable	2.91828	3.04203e-06	3.33684	7.47662e-09	-0.297259	0.820556
1678	chr1	87213450	87214749	TRUE	Stable	3.32231	1.31606e-07	3.0463	1.15924e-07	0.481071	0.704192
1679	chr1	87327000	87327749	FALSE	Stable	3.44577	4.79326e-08	3.17234	3.59396e-08	0.534439	0.667079
1680	chr1	87640000	87640299	FALSE	Stable	3.21511	3.12171e-07	1.13866	0.0455806	0.628588	0.591579
1681	chr1	87755250	87755399	FALSE	Stable	1.54044	0.0123069	1.34177	0.0184044	0.760068	0.472168
1682	chr1	87755450	87755849	FALSE	Stable	3.76742	2.97466e-09	1.66394	0.00344242	0.333082	0.796681
1683	chr1	87756050	87756799	FALSE	Stable	3.21806	3.04544e-07	2.94298	2.946e-07	0.598846	0.616119
1684	chr1	87853300	87853649	FALSE	Stable	2.88684	3.83455e-06	3.97363	9.34031e-12	-0.111751	0.936436
1685	chr1	88007900	88008599	TRUE	Stable	3.49249	3.23534e-08	2.86588	5.80705e-07	0.587876	0.625794
1686	chr1	88008650	88008849	TRUE	Stable	2.98961	1.78294e-06	1.6737	0.00326057	0.961612	0.294435
1687	chr1	88277000	88277649	FALSE	Stable	3.93613	6.37201e-10	3.10804	6.56306e-08	0.372858	0.773041
1689	chr1	88446550	88446699	FALSE	Stable	1.83327	0.0029449	2.41109	2.38754e-05	-0.605512	0.610413
1690	chr1	88447100	88447499	FALSE	Stable	2.99034	1.77322e-06	2.76668	1.36771e-06	-0.221125	0.870231
1691	chr1	88471100	88471399	FALSE	Stable	3.02021	1.41423e-06	2.64508	3.76259e-06	-0.466009	0.713993
1692	chr1	88473800	88473949	FALSE	Stable	3.73127	4.09824e-09	1.87164	0.00100436	-0.158992	0.908914
1693	chr1	88474150	88476299	FALSE	Stable	3.57902	1.54999e-08	3.0845	8.15546e-08	-0.167199	0.904569
1694	chr1	88476500	88476649	FALSE	Stable	2.12598	0.000583618	2.84844	6.7622e-07	-0.750144	0.481705
1698	chr1	88701600	88702399	FALSE	Stable	3.33937	1.14499e-07	3.08285	8.28735e-08	0.218216	0.872166
1702	chr1	89033000	89033849	FALSE	Stable	2.57039	3.54955e-05	2.91916	3.63448e-07	-0.466043	0.713967
1703	chr1	89033900	89034649	FALSE	Stable	3.05658	1.07444e-06	3.52767	1.10747e-09	-0.314325	0.808375
1705	chr1	89039300	89040699	FALSE	Stable	3.71154	4.89453e-09	3.39365	4.25676e-09	0.52675	0.67318
1706	chr1	89040950	89041299	FALSE	Stable	3.28256	1.82181e-07	1.56098	0.00606753	0.466804	0.713604
1708	chr1	89069650	89069999	TRUE	Stable	2.93553	2.66654e-06	2.39865	2.62514e-05	0.499529	0.690404
1709	chr1	89070400	89071399	TRUE	Stable	3.74953	3.48107e-09	3.09377	7.50168e-08	0.616445	0.60177
1710	chr1	89071800	89071949	FALSE	Stable	1.93721	0.00169305	1.90832	0.000799715	0.480149	0.704902
1711	chr1	89072250	89072549	FALSE	Stable	2.77807	8.43384e-06	2.21166	0.000104313	0.723178	0.507412
1712	chr1	89091900	89092099	FALSE	Stable	2.94159	2.54639e-06	1.84502	0.00118616	-0.158199	0.909161
1713	chr1	89092150	89093249	FALSE	Stable	2.78659	7.93574e-06	2.77353	1.28934e-06	0.0347341	0.982928
1714	chr1	89093550	89093649	FALSE	Stable	2.705	1.40871e-05	2.05513	0.000307864	-0.377084	0.770659
1715	chr1	89101450	89101799	FALSE	Stable	3.03067	1.30598e-06	2.03661	0.000348114	0.639755	0.582093
1717	chr1	89107600	89110299	FALSE	Stable	3.80361	2.14131e-09	3.17638	3.47237e-08	0.330434	0.798449
1718	chr1	89140100	89140249	FALSE	Stable	2.59354	3.03571e-05	1.33497	0.0190069	0.648709	0.573922
1719	chr1	89164000	89164149	FALSE	Stable	3.30208	1.55049e-07	1.45205	0.0106971	-0.491743	0.696028
1720	chr1	89183150	89183299	FALSE	Stable	4.23173	3.81712e-11	3.65788	2.91443e-10	0.573857	0.637341
1721	chr1	89190550	89190649	FALSE	Stable	2.74994	1.02693e-05	2.07604	0.000267018	-0.338538	0.792859
1722	chr1	89191400	89191549	FALSE	Stable	1.66056	0.0070068	1.87526	0.000982071	0.171249	0.901417
1724	chr1	89453900	89454799	TRUE	Stable	3.44291	4.91058e-08	3.61525	4.51548e-10	-0.00437213	0.997611
1725	chr1	89454850	89455249	TRUE	Stable	2.54829	4.1435e-05	3.95981	1.08903e-11	0.561419	0.646839
1726	chr1	89518100	89518199	FALSE	Stable	1.72825	0.00502695	1.45325	0.0106325	0.836395	0.40262
1727	chr1	89569000	89569199	FALSE	Stable	1.48771	0.0156351	2.76788	1.35384e-06	-0.0886513	0.951023
1728	chr1	89577050	89577249	FALSE	Stable	1.80211	0.00346041	2.70421	2.30699e-06	-0.34968	0.787128
1729	chr1	89647000	89647499	FALSE	Stable	3.32546	1.28129e-07	1.54594	0.00657024	0.742872	0.489196
1730	chr1	89647850	89648199	FALSE	Stable	3.64231	8.97578e-09	1.14581	0.0442213	0.878374	0.364669
1731	chr1	89669600	89669699	FALSE	Stable	1.83209	0.00296172	2.04567	0.000327862	0.347819	0.788321
1732	chr1	89670600	89671349	FALSE	Stable	4.38841	7.90894e-12	3.03383	1.29811e-07	0.202305	0.881493
1733	chr1	89671750	89672799	FALSE	Stable	3.29146	1.69245e-07	3.22366	2.21648e-08	0.317952	0.806009
1734	chr1	89707500	89707699	FALSE	Stable	1.76627	0.00415326	1.46592	0.00998286	1.0074	0.258844
1735	chr1	89708550	89708849	FALSE	Stable	3.10892	7.17519e-07	2.7632	1.40461e-06	0.635668	0.585475
1736	chr1	89709150	89709249	FALSE	Stable	2.65453	1.99998e-05	1.17569	0.0389759	0.451887	0.723558
1743	chr1	90052150	90052499	FALSE	Stable	2.84998	5.0147e-06	1.73802	0.00224978	0.22856	0.864876
1745	chr1	90118550	90118899	TRUE	Stable	2.18635	0.000407837	3.00678	1.66492e-07	0.149083	0.914372
1746	chr1	90119150	90119299	TRUE	Stable	2.02108	0.00106356	2.30576	5.26586e-05	0.276721	0.831596
1747	chr1	90119700	90119949	TRUE	Stable	2.90192	3.42462e-06	1.74489	0.00216184	0.443906	0.728342
1748	chr1	90153250	90153399	FALSE	Stable	4.15543	7.91154e-11	2.21735	0.00010018	0.336559	0.793931
1749	chr1	90153850	90154199	FALSE	Stable	1.45825	0.0177857	3.8242	4.88359e-11	-0.0715101	0.961502
1751	chr1	90280700	90280799	FALSE	Stable	2.06084	0.000850569	2.93551	3.14841e-07	0.699157	0.529101
1753	chr1	90299950	90300149	FALSE	Stable	2.19764	0.000381406	2.17375	0.000136128	0.585295	0.628149
1754	chr1	90300500	90300849	FALSE	Stable	1.60131	0.00929226	3.49381	1.57512e-09	-0.33895	0.792656
1755	chr1	90335350	90335649	TRUE	Stable	2.54799	4.15162e-05	2.65652	3.42346e-06	-0.3661	0.777442
1756	chr1	90337650	90338049	TRUE	Stable	1.5788	0.0103281	3.22039	2.28776e-08	-0.674827	0.551578
1759	chr1	90374250	90374599	FALSE	Stable	1.73791	0.00479052	2.76648	1.36955e-06	-0.47913	0.705447
1761	chr1	90433550	90433799	FALSE	Stable	2.08818	0.000726311	2.6171	4.72666e-06	0.178122	0.897234
1762	chr1	90433950	90434099	FALSE	Stable	3.43259	5.34082e-08	2.10047	0.000226161	0.305164	0.814419
1763	chr1	90434300	90434649	FALSE	Stable	1.94644	0.00160968	3.40334	3.87416e-09	-0.073042	0.960725
1767	chr1	90481600	90482249	FALSE	Stable	2.29374	0.00021289	3.57343	6.95132e-10	-0.466392	0.713608
1768	chr1	90519500	90519749	FALSE	Stable	2.895	3.60626e-06	2.97144	2.28063e-07	-0.104127	0.941187
1769	chr1	90520200	90520349	FALSE	Stable	2.17238	0.000443544	3.14792	4.5391e-08	-0.000500121	0.999669
1770	chr1	90544050	90544249	FALSE	Stable	3.34446	1.10116e-07	1.22679	0.0312037	0.280719	0.828662
1771	chr1	90602900	90603999	FALSE	Stable	3.20785	3.31124e-07	2.55491	7.79391e-06	0.461613	0.717723
1772	chr1	90650950	90651649	FALSE	Stable	2.64555	2.12707e-05	2.60038	5.40916e-06	0.207267	0.878387
1773	chr1	90743850	90744749	FALSE	Stable	2.83359	5.64115e-06	2.59681	5.57373e-06	0.638505	0.583089
1774	chr1	90745000	90745249	FALSE	Stable	3.11559	6.81152e-07	1.13975	0.0453694	0.721066	0.509282
1775	chr1	90835750	90835999	FALSE	Stable	2.04895	0.000911752	2.16844	0.000141363	0.432935	0.734934
1776	chr1	90836050	90836299	FALSE	Stable	3.04138	1.20811e-06	2.37116	3.23835e-05	0.63908	0.582379
1777	chr1	90836600	90836749	FALSE	Stable	1.42577	0.0204853	2.88787	4.79375e-07	0.0965016	0.945958
1778	chr1	90836800	90836999	FALSE	Stable	2.80489	6.93638e-06	2.21475	0.000102073	0.562447	0.646217
1780	chr1	90837800	90838249	FALSE	Stable	2.86766	4.42637e-06	2.80769	9.58394e-07	0.439722	0.731246
1781	chr1	90838650	90838949	FALSE	Stable	2.99663	1.68917e-06	1.50287	0.00824504	0.872831	0.369344
1782	chr1	90884850	90885049	FALSE	Stable	2.56921	3.57796e-05	1.4835	0.00912414	0.0514908	0.973387
1783	chr1	90885200	90886549	FALSE	Stable	3.12069	6.54969e-07	3.2836	1.25319e-08	-0.143816	0.917547
1784	chr1	90886650	90886899	FALSE	Stable	1.29478	0.0353378	2.31892	4.78458e-05	0.203731	0.880642
1785	chr1	91038850	91038949	FALSE	Stable	3.32983	1.23609e-07	2.0607	0.000296586	1.26912	0.10797
1786	chr1	91061950	91062199	FALSE	Stable	2.81713	6.35407e-06	2.25352	7.72615e-05	0.542837	0.661407
1787	chr1	91076600	91076849	FALSE	Stable	4.3711	9.381e-12	1.67696	0.00320091	0.352358	0.785264
1788	chr1	91098600	91098949	FALSE	Stable	2.5096	5.32739e-05	1.3683	0.0161981	0.644709	0.57713
1789	chr1	91249550	91249849	TRUE	Stable	1.58578	0.0099947	2.70373	2.31564e-06	0.433072	0.734934
1790	chr1	91250400	91250949	TRUE	Stable	3.00792	1.55198e-06	2.02565	0.000374272	0.94423	0.309065
1791	chr1	91397950	91399299	TRUE	Stable	4.32999	1.42879e-11	3.79619	6.58812e-11	0.4946	0.694103
1792	chr1	91412850	91413099	FALSE	Stable	3.35423	1.0174e-07	1.57392	0.00565527	0.575821	0.63585
1793	chr1	91413450	91414699	TRUE	Stable	3.24371	2.47599e-07	2.40592	2.48357e-05	0.634353	0.586502
1797	chr1	91596350	91596999	FALSE	Stable	2.04976	0.000907591	2.71777	2.05866e-06	0.294624	0.821893
1799	chr1	91600100	91602249	FALSE	Stable	3.86444	1.23289e-09	3.1837	3.23685e-08	0.31834	0.805713
1800	chr1	91605350	91605499	FALSE	Stable	2.13238	0.00056213	2.29075	5.88027e-05	-0.186057	0.892058
1801	chr1	91606150	91606249	FALSE	Stable	1.28006	0.0374304	2.46856	1.53808e-05	-0.213468	0.875111
1803	chr1	91684700	91686649	FALSE	Stable	3.56266	1.78411e-08	3.1131	6.25527e-08	0.244182	0.853581
1804	chr1	91728700	91728899	FALSE	Stable	2.12408	0.000589452	2.00719	0.000422994	0.346159	0.788822
1805	chr1	91729000	91729149	FALSE	Stable	3.20533	3.37312e-07	2.72258	1.97837e-06	0.868701	0.372638
1807	chr1	91731000	91731899	TRUE	Stable	3.41087	6.39336e-08	2.77582	1.26371e-06	0.513451	0.681383
1808	chr1	91732200	91732899	TRUE	Stable	3.26907	2.03085e-07	2.96793	2.35474e-07	0.488541	0.697784
1809	chr1	91754750	91755049	FALSE	Stable	2.71254	1.33804e-05	1.89229	0.000883033	0.300202	0.818314
1810	chr1	91757200	91757349	FALSE	Stable	2.26836	0.000248652	2.44903	1.78555e-05	0.205284	0.879775
1811	chr1	91757850	91758099	FALSE	Stable	4.19048	5.6414e-11	1.24332	0.0289953	0.605382	0.610429
1812	chr1	91759400	91759599	FALSE	Stable	3.51637	2.63696e-08	2.03711	0.00034698	0.466827	0.713604
1813	chr1	91759850	91760199	FALSE	Stable	2.6628	1.89399e-05	2.23041	9.12903e-05	-0.087653	0.95192
1814	chr1	91760350	91760699	FALSE	Stable	3.51625	2.63951e-08	2.00969	0.000415858	0.302072	0.816662
1816	chr1	91769750	91770199	FALSE	Stable	3.53579	2.24038e-08	1.6301	0.00415601	1.28477	0.101925
1817	chr1	91770300	91770449	TRUE	Stable	1.57807	0.0103594	2.45467	1.7116e-05	0.314907	0.808044
1818	chr1	91770500	91770899	TRUE	Stable	4.41639	5.94519e-12	2.78421	1.17405e-06	1.27788	0.104235
1819	chr1	91771050	91771449	TRUE	Stable	2.65652	1.97396e-05	1.53966	0.00679859	1.23178	0.123851
1822	chr1	91799850	91801299	FALSE	Stable	4.0252	2.74916e-10	4.11863	1.80097e-12	0.470572	0.711642
1823	chr1	91801450	91801999	FALSE	Stable	3.07949	8.9926e-07	2.41465	2.32326e-05	0.519484	0.676939
1824	chr1	91802100	91802249	FALSE	Stable	1.37165	0.0257831	2.89831	4.36953e-07	0.446276	0.727194
1825	chr1	91844350	91844449	TRUE	Stable	2.38793	0.000117242	4.04867	4.03934e-12	-0.0869041	0.952269
1826	chr1	91844900	91845249	TRUE	Stable	2.69641	1.49529e-05	3.14092	4.85426e-08	0.107921	0.939031
1827	chr1	91845450	91845599	FALSE	Stable	2.57502	3.44372e-05	2.55905	7.54373e-06	-0.0151686	0.991397
1828	chr1	91952400	91953049	FALSE	Stable	2.54925	4.11678e-05	2.94449	2.90498e-07	-0.433278	0.734722
1829	chr1	91953300	91953549	FALSE	Stable	1.22365	0.046641	2.96887	2.33458e-07	-0.608768	0.60806
1832	chr1	91962800	91964549	FALSE	Stable	2.78486	8.03962e-06	3.02503	1.40399e-07	-0.611689	0.606043
1833	chr1	91964800	91965649	FALSE	Stable	2.89282	3.66152e-06	3.31243	9.42933e-09	-0.2983	0.819887
1834	chr1	92082750	92083049	FALSE	Stable	2.76844	9.03971e-06	1.13059	0.0471551	1.08665	0.204899
1835	chr1	92083150	92084349	FALSE	Stable	4.183	6.10131e-11	3.16053	4.02595e-08	0.661324	0.56289
1836	chr1	92091350	92091449	FALSE	Stable	2.04828	0.000914093	1.63819	0.00397461	-0.199764	0.88288
1838	chr1	92178350	92178499	FALSE	Stable	1.29973	0.0346317	1.90369	0.000821757	0.170453	0.901909
1839	chr1	92178800	92179849	FALSE	Stable	3.07056	9.62198e-07	3.07114	9.25043e-08	-0.0393124	0.980033
1840	chr1	92180450	92181399	TRUE	Stable	3.77205	2.84736e-09	3.57884	6.56939e-10	0.0716029	0.961474
1841	chr1	92370750	92371049	FALSE	Stable	2.46678	7.06639e-05	1.95669	0.000586499	0.474516	0.708454
1842	chr1	92371150	92373249	TRUE	Stable	3.33879	1.15071e-07	2.27728	6.49482e-05	0.94099	0.311871
1843	chr1	92377550	92377849	FALSE	Stable	2.65867	1.9471e-05	1.30467	0.0218846	0.9997	0.264492
1844	chr1	92378650	92379149	FALSE	Stable	2.72617	1.21525e-05	2.31283	5.00456e-05	0.791019	0.444363
1845	chr1	92398250	92398649	TRUE	Stable	2.79098	7.67696e-06	1.43637	0.0115845	1.31772	0.0891836
1849	chr1	92473400	92473649	FALSE	Stable	2.75962	9.59503e-06	2.14516	0.000166423	0.577568	0.634225
1851	chr1	92641650	92641949	FALSE	Stable	2.98063	1.90797e-06	1.91066	0.000787782	0.356837	0.782887
1852	chr1	92772850	92773099	FALSE	Stable	1.58754	0.00991147	2.96913	2.32959e-07	0.0440302	0.976929
1853	chr1	92774950	92775099	FALSE	Stable	2.73508	1.14164e-05	1.71026	0.00263925	0.414963	0.746395
1857	chr1	92790250	92792449	TRUE	Stable	4.15323	8.08183e-11	3.43205	2.89404e-09	0.00253551	0.998646
1858	chr1	92831650	92832899	TRUE	Stable	4.28622	2.21285e-11	3.86459	3.13343e-11	0.443312	0.728594
1859	chr1	92832950	92833049	FALSE	Stable	2.54184	4.30121e-05	1.39513	0.0142233	1.11903	0.183915
1860	chr1	92933750	92935199	TRUE	Stable	2.97362	2.01016e-06	2.76911	1.34025e-06	0.405203	0.75194
1861	chr1	93175550	93178199	TRUE	Stable	4.30805	1.77601e-11	4.21968	5.57502e-13	0.245979	0.85234
1863	chr1	93210200	93210499	FALSE	Stable	1.47897	0.0162621	2.54788	8.24313e-06	-0.294492	0.821942
1864	chr1	93214250	93214649	FALSE	Stable	2.78497	8.03339e-06	1.84736	0.00116905	0.48695	0.698988
1865	chr1	93214900	93215099	FALSE	Stable	1.96587	0.00145225	3.14126	4.83754e-08	0.38321	0.766582
1866	chr1	93216250	93216499	FALSE	Stable	3.85296	1.36859e-09	1.59077	0.0051591	-0.343438	0.790273
1867	chr1	93218150	93218349	FALSE	Stable	1.77145	0.00404962	2.92682	3.39878e-07	0.140748	0.919442
1869	chr1	93219900	93222099	TRUE	Stable	4.04699	2.24582e-10	3.78421	7.5351e-11	0.256204	0.844478
1870	chr1	93225050	93225149	FALSE	Stable	2.92893	2.80123e-06	2.10274	0.000222779	0.79851	0.437394
1871	chr1	93225450	93226249	FALSE	Stable	3.25502	2.26986e-07	2.62453	4.445e-06	0.356751	0.782887
1872	chr1	93232750	93233349	FALSE	Stable	3.16178	4.75053e-07	1.57947	0.00548829	0.44532	0.727768
1874	chr1	93305500	93305699	FALSE	Stable	1.99164	0.00125626	2.08806	0.000246524	-0.129636	0.925958
1875	chr1	93342300	93342699	TRUE	Stable	3.54949	2.002e-08	3.28053	1.29214e-08	0.456365	0.720656
1876	chr1	93342950	93343499	TRUE	Stable	3.38492	7.88414e-08	1.90048	0.000838769	0.709494	0.519415
1877	chr1	93343700	93344099	TRUE	Stable	2.85551	4.8257e-06	2.43844	1.93907e-05	0.702262	0.526389
1878	chr1	93444800	93445649	TRUE	Stable	3.56171	1.79898e-08	2.70965	2.20625e-06	0.662885	0.562003
1879	chr1	93445750	93445949	TRUE	Stable	2.28364	0.000226662	1.72556	0.00241757	0.944035	0.309162
1880	chr1	93477750	93480249	TRUE	Stable	3.89141	9.62489e-10	3.51031	1.32232e-09	0.669888	0.556556
1881	chr1	93511750	93511899	TRUE	Stable	1.50023	0.0147768	2.30308	5.36951e-05	0.493284	0.694914
1882	chr1	93617650	93617849	FALSE	Stable	1.8786	0.00232314	2.22816	9.2815e-05	-0.578218	0.633878
1883	chr1	93617900	93618049	FALSE	Stable	3.34047	1.13465e-07	2.88092	5.09928e-07	-0.150311	0.913838
1884	chr1	93618200	93619199	FALSE	Stable	3.00834	1.5475e-06	3.25599	1.62677e-08	-0.0946232	0.947346
1885	chr1	93635350	93635649	TRUE	Stable	1.81376	0.00325685	2.81232	9.21844e-07	-0.0345529	0.982932
1886	chr1	93636000	93636349	TRUE	Stable	2.4968	5.7969e-05	2.62403	4.46393e-06	0.252515	0.847326
1890	chr1	93754250	93755449	TRUE	Stable	3.00043	1.64112e-06	3.38616	4.59445e-09	0.252604	0.847261
1892	chr1	93801350	93802549	FALSE	Stable	3.94556	5.84352e-10	2.91916	3.63452e-07	0.649784	0.573062
1893	chr1	93803400	93804449	FALSE	Stable	3.08051	8.9211e-07	3.87633	2.7422e-11	0.37159	0.773808
1894	chr1	93824500	93824699	FALSE	Stable	2.09549	0.000696162	1.92348	0.000725525	-0.446145	0.727282
1895	chr1	93825000	93825149	FALSE	Stable	2.01996	0.00107056	2.61613	4.76386e-06	0.217121	0.872706
1896	chr1	93825250	93825599	FALSE	Stable	3.06014	1.04531e-06	2.37592	3.12411e-05	0.35733	0.782669
1897	chr1	94035300	94035649	FALSE	Stable	3.41352	6.27337e-08	1.92987	0.00069695	0.133531	0.924025
1899	chr1	95313700	95314099	FALSE	Stable	2.95781	2.26473e-06	2.03764	0.000345822	0.619369	0.599064
1901	chr1	96362050	96362149	FALSE	Stable	2.12294	0.000592921	1.732	0.0023293	0.390937	0.761389
1905	chr1	96778250	96778649	FALSE	Stable	3.25123	2.34027e-07	1.47451	0.00955544	0.742494	0.489862
1906	chr1	96778800	96779199	FALSE	Stable	2.71098	1.35384e-05	1.35269	0.0174753	0.959367	0.296059
1907	chr1	96779400	96779549	FALSE	Stable	1.92026	0.00185912	1.24455	0.0288393	0.965656	0.291635
1908	chr1	97595100	97595549	FALSE	Stable	2.52822	4.71403e-05	1.91129	0.000784494	0.359352	0.781491
1911	chr1	97611200	97611849	FALSE	Stable	3.44423	4.85919e-08	4.80933	4.10148e-16	0.0187603	0.989716
1912	chr1	97612200	97612299	FALSE	Stable	2.24559	0.000285331	1.27893	0.0246483	-0.634859	0.586089
1913	chr1	97612550	97612699	FALSE	Stable	2.09799	0.000685838	2.62973	4.26738e-06	-0.552511	0.653564
1916	chr1	97661500	97661949	FALSE	Stable	4.15895	7.67705e-11	3.10111	6.99607e-08	0.0260429	0.986486
1917	chr1	97769200	97769299	FALSE	Stable	1.96221	0.00147892	1.3283	0.0196073	-0.134031	0.923775
1918	chr1	97769550	97770699	FALSE	Stable	3.38644	7.78394e-08	3.09448	7.45069e-08	0.33531	0.794889
1919	chr1	97924100	97924399	FALSE	Stable	3.5961	1.34431e-08	1.7172	0.00253744	0.851944	0.387505
1920	chr1	97949400	97949499	FALSE	Stable	4.40999	6.35039e-12	3.04297	1.1934e-07	0.35459	0.783943
1929	chr1	98095350	98095749	FALSE	Stable	3.26627	2.0718e-07	1.72711	0.00239733	0.655759	0.568168
1932	chr1	100231650	100231949	FALSE	Stable	2.60553	2.80038e-05	2.21848	9.94233e-05	0.349698	0.78711
1933	chr1	104294000	104294099	FALSE	Stable	2.36354	0.000136935	1.68699	0.00302066	0.655775	0.568165
1934	chr1	105081350	105081749	FALSE	Stable	1.42426	0.0206195	2.94514	2.89027e-07	-0.23261	0.861837
1935	chr1	105083300	105083449	FALSE	Stable	2.78065	8.27767e-06	1.14581	0.0442213	-0.565454	0.643992
1936	chr1	105083750	105083849	FALSE	Stable	1.40075	0.022783	2.34816	3.84534e-05	-0.386012	0.764012
1939	chr1	105176350	105176499	FALSE	Stable	1.73019	0.00497946	2.72011	2.01801e-06	0.306201	0.813658
1941	chr1	105178500	105178599	FALSE	Stable	2.12367	0.000590527	3.64217	3.43583e-10	0.0553313	0.970896
1942	chr1	105663200	105663599	FALSE	Stable	2.45503	7.62382e-05	2.67285	2.99612e-06	0.620788	0.598287
1943	chr1	105664200	105664299	FALSE	Stable	1.31507	0.0325297	2.34816	3.84534e-05	0.525517	0.673649
1945	chr1	105981100	105981799	FALSE	Stable	1.78057	0.0038656	3.70509	1.75781e-10	-0.959416	0.296059
1947	chr1	105990450	105990649	TRUE	Stable	3.34865	1.06506e-07	2.74777	1.59912e-06	0.156099	0.910357
1949	chr1	106170650	106171349	FALSE	Stable	3.22771	2.81471e-07	3.09795	7.21168e-08	0.439623	0.73141
1950	chr1	106171700	106172149	FALSE	Stable	4.37061	9.42671e-12	2.78976	1.11786e-06	0.132984	0.924292
1951	chr1	106172250	106172499	FALSE	Stable	4.00148	3.46536e-10	2.72258	1.97837e-06	-0.322617	0.80331
1955	chr1	106620400	106620499	FALSE	Stable	1.26895	0.0390951	2.23731	8.68139e-05	-0.406958	0.750755
1956	chr1	106713650	106714249	TRUE	Stable	4.62268	6.9863e-13	1.89989	0.000841775	1.2283	0.125516
1957	chr1	106714600	106714849	TRUE	Stable	1.88426	0.00225297	1.99672	0.000453258	1.02399	0.247144
1958	chr1	106743950	106744049	FALSE	Stable	3.25872	2.19972e-07	1.91599	0.000760951	-0.258783	0.842389
1959	chr1	106759900	106760299	TRUE	Stable	2.84578	5.17243e-06	2.14144	0.000170846	0.15313	0.911948
1960	chr1	106760650	106760849	FALSE	Stable	3.07442	9.35891e-07	1.89501	0.000867737	0.166973	0.904709
1961	chr1	106795600	106796699	TRUE	Stable	4.0145	3.05457e-10	3.2044	2.66739e-08	0.548318	0.657153
1962	chr1	106981050	106981349	FALSE	Stable	4.30778	1.77664e-11	2.04065	0.000338892	0.665615	0.559382
1966	chr1	108281500	108281799	FALSE	Stable	3.64735	8.5777e-09	1.67016	0.00332407	0.950236	0.304264
1969	chr1	110446750	110446899	FALSE	Stable	3.20014	3.51023e-07	2.30308	5.36951e-05	-0.115376	0.934057
1970	chr1	110447450	110448299	FALSE	Stable	4.04644	2.25754e-10	3.81926	5.16011e-11	0.613142	0.604535
1971	chr1	110448350	110448849	FALSE	Stable	2.07263	0.000794515	3.90497	2.02043e-11	0.140608	0.919587
1972	chr1	110470650	110470799	FALSE	Stable	2.84279	5.28341e-06	1.45658	0.0104589	-0.215316	0.873835
1973	chr1	111017950	111018149	FALSE	Stable	3.73127	4.09824e-09	1.33802	0.0187388	0.0514716	0.973405
1974	chr1	111018400	111018549	FALSE	Stable	1.98292	0.00131862	2.22727	9.33812e-05	-0.265124	0.838583
1975	chr1	111019000	111019149	FALSE	Stable	2.16165	0.000472566	1.12399	0.0484886	0.0058602	0.997023
1976	chr1	111019300	111022149	FALSE	Stable	4.32433	1.50264e-11	4.46074	3.1592e-14	0.354634	0.783943
1977	chr1	111022300	111022499	FALSE	Stable	1.95952	0.00150028	1.67257	0.00328115	0.516215	0.679311
1978	chr1	111697500	111697749	FALSE	Stable	3.73127	4.09824e-09	1.57451	0.0056374	1.14432	0.168963
1979	chr1	111698050	111699499	TRUE	Stable	4.39609	7.30446e-12	3.21843	2.33028e-08	1.26533	0.109373
1980	chr1	111699750	111700549	TRUE	Stable	3.39307	7.38398e-08	1.72847	0.00237787	1.16802	0.155758
1981	chr1	111856900	111856999	FALSE	Stable	2.91111	3.20159e-06	2.73884	1.72344e-06	0.172274	0.900777
1982	chr1	111857550	111857799	FALSE	Stable	2.0072	0.00115067	3.08599	8.03849e-08	0.217339	0.872607
1983	chr1	111858200	111858349	FALSE	Stable	3.56584	1.73455e-08	1.44474	0.0111012	1.10867	0.190747
1984	chr1	111858450	111858599	FALSE	Stable	1.50227	0.0146422	1.9195	0.000743868	0.557815	0.649555
1985	chr1	111864250	111864899	FALSE	Stable	3.80352	2.14301e-09	3.89306	2.28401e-11	0.4584	0.719401
1986	chr1	118310750	118311699	TRUE	Stable	3.79166	2.38365e-09	3.37017	5.37566e-09	0.475794	0.707973
1987	chr1	118322000	118322249	FALSE	Stable	2.51842	5.01761e-05	1.80746	0.00149	0.0220248	0.988541
1988	chr1	118388000	118390399	TRUE	Stable	4.52753	1.86181e-12	3.62305	4.18083e-10	0.512764	0.681706
1989	chr1	118458850	118459699	FALSE	Stable	4.26889	2.62626e-11	3.49671	1.52687e-09	0.732993	0.498306
1990	chr1	118799200	118799449	FALSE	Stable	3.02247	1.39101e-06	1.71101	0.00262838	0.284513	0.826855
1991	chr1	118825100	118825499	TRUE	Stable	2.61703	2.58789e-05	2.16695	0.000142837	0.149274	0.914359
1992	chr1	118826200	118826449	FALSE	Stable	3.21856	3.03262e-07	2.28875	5.96247e-05	0.89522	0.349897
1993	chr1	118878700	118878999	FALSE	Stable	3.83452	1.62382e-09	1.61187	0.00459254	0.604522	0.610947
1994	chr1	118879150	118879249	FALSE	Stable	1.95155	0.00156506	2.87983	5.13777e-07	0.0467505	0.975557
1996	chr1	118901800	118902099	FALSE	Stable	2.45246	7.74623e-05	1.9032	0.000824436	0.929012	0.321873
1997	chr1	118902350	118902949	FALSE	Stable	3.30403	1.52822e-07	2.96914	2.32959e-07	0.449823	0.725418
1998	chr1	118903850	118903949	FALSE	Stable	1.88942	0.0021908	1.36694	0.0163084	-0.509308	0.683912
1999	chr1	118904100	118905999	FALSE	Stable	3.74308	3.68928e-09	3.20927	2.54861e-08	0.493382	0.694914
2001	chr1	118908250	118908549	FALSE	Stable	2.54943	4.11152e-05	1.43314	0.011777	-0.0881912	0.95141
2002	chr1	118908750	118908849	FALSE	Stable	1.75378	0.00441671	1.43151	0.0118686	0.294587	0.821893
2003	chr1	118916250	118916549	FALSE	Stable	2.6855	1.61449e-05	1.55282	0.0063345	1.26605	0.109065
2004	chr1	118916850	118917349	FALSE	Stable	3.0517	1.11838e-06	1.68832	0.00299929	1.0843	0.206174
2006	chr1	118917950	118918349	FALSE	Stable	2.47047	6.88843e-05	2.18456	0.000126329	0.949231	0.305085
2007	chr1	118923600	118923749	FALSE	Stable	2.38613	0.000118624	1.84144	0.00121271	0.513559	0.681221
2008	chr1	118924200	118924599	FALSE	Stable	2.2999	0.000204715	2.37961	3.04115e-05	-0.116029	0.933612
2010	chr1	118981500	118982499	TRUE	Stable	3.38919	7.6243e-08	2.55599	7.7258e-06	0.231427	0.862444
2011	chr1	118982600	118984349	TRUE	Stable	3.92005	7.3897e-10	2.68578	2.69142e-06	0.346302	0.788822
2013	chr1	119033600	119035049	FALSE	Stable	3.62483	1.04744e-08	2.52247	1.00532e-05	0.892553	0.352346
2014	chr1	119047500	119048249	FALSE	Stable	4.79585	1.11132e-13	4.40327	6.42381e-14	0.507501	0.685133
2015	chr1	119048450	119049449	FALSE	Stable	3.3743	8.61936e-08	3.20711	2.60063e-08	0.129461	0.925958
2016	chr1	119051450	119055499	TRUE	Stable	5.21772	1.18344e-15	4.57642	7.916e-15	-0.0573596	0.969927
2017	chr1	119152600	119152799	FALSE	Stable	2.2086	0.000357486	1.35908	0.0169411	-0.507241	0.685286
2018	chr1	119153000	119153699	FALSE	Stable	3.17772	4.18116e-07	3.03576	1.27644e-07	-0.409247	0.749388
2020	chr1	119504250	119504499	FALSE	Stable	3.08038	8.92629e-07	1.76146	0.00196194	-0.128937	0.926171
2021	chr1	119504550	119504749	FALSE	Stable	1.40482	0.0223971	2.34274	4.00787e-05	-0.163509	0.906399
2022	chr1	119525600	119526699	FALSE	Stable	2.76218	9.41585e-06	2.95492	2.6424e-07	0.183289	0.893999
2023	chr1	119648450	119648999	TRUE	Stable	3.52495	2.45464e-08	2.49112	1.29046e-05	0.827242	0.411471
2024	chr1	119836650	119837499	FALSE	Stable	4.52903	1.83157e-12	4.04324	4.30281e-12	0.296617	0.820739
2025	chr1	119903050	119903249	FALSE	Stable	2.76761	9.08294e-06	1.61675	0.00447397	0.309729	0.811734
2026	chr1	119912700	119912949	FALSE	Stable	2.75471	9.94386e-06	1.90597	0.000810606	0.817597	0.420157
2027	chr1	120120500	120121049	FALSE	Stable	3.61305	1.16166e-08	2.79683	1.05228e-06	0.916226	0.332664
2028	chr1	120121150	120121849	FALSE	Stable	4.09806	1.3692e-10	2.52446	9.89019e-06	0.535749	0.666171
2029	chr1	120258950	120259149	FALSE	Stable	2.89445	3.6168e-06	1.22109	0.0319735	0.646405	0.576093
2031	chr1	120714550	120714749	FALSE	Stable	3.70346	5.25065e-09	1.3398	0.0185796	0.163357	0.906444
2032	chr1	120714850	120715449	FALSE	Stable	2.31204	0.000189458	3.2197	2.30238e-08	0.0545221	0.971497
2033	chr1	120715850	120716099	FALSE	Stable	2.03573	0.000979594	3.67997	2.29204e-10	0.328693	0.799623
2034	chr1	120716150	120716349	FALSE	Stable	2.00397	0.00117194	2.12015	0.000197702	0.113079	0.935504
2036	chr1	120740850	120741599	FALSE	Stable	3.37535	8.54497e-08	2.89498	4.50232e-07	0.0487827	0.974699
2037	chr1	120741750	120742249	FALSE	Stable	2.45012	7.86317e-05	2.64404	3.79599e-06	0.236894	0.859143
2038	chr1	120759950	120760149	FALSE	Stable	2.83863	5.45062e-06	2.21848	9.94233e-05	0.0102906	0.994228
2039	chr1	120760800	120761349	TRUE	Stable	3.48725	3.38573e-08	2.78017	1.21526e-06	0.210489	0.876607
2040	chr1	120761700	120762049	TRUE	Stable	3.22731	2.82336e-07	2.88293	5.01073e-07	0.311168	0.810768
2042	chr1	121327400	121327599	TRUE	Stable	1.43671	0.0195304	3.7776	8.08779e-11	-0.0323284	0.984175
2043	chr1	121327800	121328149	TRUE	Stable	2.99178	1.75502e-06	2.72446	1.94927e-06	0.424086	0.740231
2044	chr1	121395300	121395699	FALSE	Stable	3.30849	1.4758e-07	2.00523	0.000428562	0.685109	0.543069
2046	chr1	121567400	121568199	FALSE	Stable	3.48111	3.56813e-08	1.73505	0.00228829	0.428307	0.737805
2047	chr1	121756050	121756149	FALSE	Stable	2.49809	5.74551e-05	2.52638	9.74053e-06	-0.0490709	0.974532
2049	chr1	122662150	122662349	FALSE	Stable	1.54381	0.0121279	3.68722	2.12507e-10	-1.15175	0.164626
2050	chr1	122663000	122663149	FALSE	Stable	1.85112	0.0026817	4.01533	5.88095e-12	-1.17254	0.153256
2053	chr1	124338350	124338549	FALSE	Stable	1.91945	0.00186665	2.44985	1.77523e-05	-1.14026	0.171371
2054	chr1	124435600	124435899	FALSE	Stable	2.50582	5.46513e-05	1.37305	0.0158389	0.0985454	0.944704
2055	chr1	124590550	124590649	FALSE	Stable	2.6893	1.57073e-05	2.6652	3.18798e-06	1.01576	0.253009
2056	chr1	124590950	124591249	FALSE	Stable	2.79833	7.27606e-06	2.18158	0.000128942	-0.417473	0.744723
2057	chr1	124591350	124591699	FALSE	Stable	3.53002	2.34579e-08	1.67001	0.00332694	0.241885	0.855298
2058	chr1	124592000	124592449	FALSE	Stable	2.56369	3.72187e-05	2.64508	3.76259e-06	-0.116969	0.93297
2059	chr1	124592600	124592899	FALSE	Stable	3.53196	2.30589e-08	2.14174	0.000170508	0.363265	0.779208
2062	chr1	125124600	125124749	FALSE	Stable	1.4074	0.0221516	2.9887	1.95137e-07	-0.0226966	0.987996
2063	chr1	125157900	125158049	FALSE	Stable	2.98811	1.80276e-06	2.31134	5.0582e-05	0.655995	0.567909
2064	chr1	125350500	125350899	FALSE	Stable	2.9628	2.18647e-06	3.05913	1.03069e-07	0.456101	0.720785
2065	chr1	125351350	125351549	FALSE	Stable	2.17896	0.000426176	1.37305	0.0158389	0.577251	0.634437
2067	chr1	125433950	125435749	TRUE	Stable	4.0251	2.75162e-10	4.214	5.93429e-13	0.15457	0.911228
2068	chr1	125436050	125436449	TRUE	Stable	2.8318	5.71884e-06	1.82718	0.00132219	0.58819	0.625475
2071	chr1	125489050	125489149	FALSE	Stable	1.86248	0.00252571	1.45325	0.0106325	0.388455	0.762942
2072	chr1	125489600	125489799	FALSE	Stable	3.0102	1.52494e-06	1.39076	0.0145274	0.36467	0.778223
2073	chr1	125489950	125490149	FALSE	Stable	1.74175	0.00469588	3.14207	4.80416e-08	-0.104194	0.941124
2074	chr1	125525300	125525449	FALSE	Stable	2.5099	5.31655e-05	1.64822	0.00375755	0.833994	0.40464
2075	chr1	125525600	125527799	FALSE	Stable	3.48281	3.51785e-08	2.52312	1.00009e-05	0.958863	0.296399
2076	chr1	125559600	125560899	TRUE	Stable	3.72041	4.52007e-09	3.71669	1.5516e-10	0.46777	0.713303
2077	chr1	125561050	125561499	TRUE	Stable	2.9192	3.01971e-06	2.44369	1.86143e-05	0.437779	0.732478
2079	chr1	126351450	126351899	FALSE	Stable	3.08175	8.83089e-07	2.03858	0.000343594	0.202044	0.881493
2080	chr1	126352450	126352699	FALSE	Stable	3.55811	1.85443e-08	1.20036	0.0350125	1.3308	0.0848867
2081	chr1	126511400	126511699	FALSE	Stable	2.57467	3.45226e-05	2.01811	0.000393034	0.942513	0.310365
2084	chr1	126599900	126600099	FALSE	Stable	2.86674	4.45328e-06	1.22109	0.0319735	-0.37297	0.773011
2085	chr1	126600150	126600249	FALSE	Stable	2.2588	0.000263869	1.39349	0.0143374	0.84454	0.395736
2086	chr1	126600950	126601099	FALSE	Stable	1.52918	0.0129619	2.72139	1.99722e-06	0.78073	0.453584
2087	chr1	126601150	126601799	FALSE	Stable	3.3452	1.09616e-07	1.63911	0.00395474	0.750377	0.481547
2088	chr1	126602100	126602449	FALSE	Stable	1.65438	0.0072167	4.03248	4.84227e-12	0.192939	0.887564
2089	chr1	126933450	126933549	FALSE	Stable	2.83109	5.73889e-06	1.16342	0.0410525	0.0661487	0.964315
2090	chr1	126939650	126939749	FALSE	Stable	2.61322	2.65238e-05	1.65277	0.0036619	-0.0519871	0.973322
2091	chr1	127001100	127001299	FALSE	Stable	2.80143	7.11514e-06	1.55622	0.00622377	0.477277	0.707046
2092	chr1	127001400	127001549	FALSE	Stable	2.83555	5.56889e-06	2.84849	6.76111e-07	-0.0337083	0.983234
2093	chr1	127002400	127002599	FALSE	Stable	2.44171	8.30554e-05	1.28735	0.0237104	0.270962	0.83527
2094	chr1	127204850	127205799	TRUE	Stable	3.47719	3.69327e-08	2.63073	4.23472e-06	0.347707	0.788321
2095	chr1	127261400	127262299	FALSE	Stable	3.83814	1.56928e-09	1.84007	0.00122327	1.42982	0.0550373
2096	chr1	127393550	127393749	FALSE	Stable	2.80992	6.68282e-06	1.42067	0.0125344	0.362305	0.779559
2097	chr1	127393950	127394249	FALSE	Stable	1.88518	0.00224158	2.70745	2.24649e-06	0.141735	0.918693
2098	chr1	127441500	127441699	FALSE	Stable	1.9758	0.0013727	2.66527	3.18798e-06	-0.720611	0.509472
2099	chr1	127441850	127443099	TRUE	Stable	3.72404	4.36901e-09	3.14153	4.82961e-08	0.189385	0.889929
2100	chr1	127443150	127443899	TRUE	Stable	3.8199	1.85508e-09	2.86021	6.10569e-07	0.0487583	0.974699
2101	chr1	127444050	127445149	FALSE	Stable	2.55052	4.0807e-05	3.29072	1.16824e-08	0.174577	0.899285
2104	chr1	127536800	127537649	TRUE	Stable	4.0517	2.14724e-10	1.34169	0.0184114	1.25638	0.112746
2105	chr1	127773100	127773899	FALSE	Stable	3.29649	1.62386e-07	3.34507	6.88081e-09	0.353144	0.78506
2106	chr1	127774000	127775299	FALSE	Stable	4.95021	2.18421e-14	3.95546	1.14271e-11	0.441117	0.730023
2107	chr1	127775700	127775849	FALSE	Stable	1.99437	0.00123754	1.98014	0.000504217	0.575625	0.636051
2108	chr1	127868850	127869099	FALSE	Stable	2.93507	2.67603e-06	2.31312	4.9936e-05	0.324883	0.801863
2109	chr1	127986000	127986099	FALSE	Stable	2.27587	0.000237292	2.79287	1.08829e-06	0.47466	0.708454
2110	chr1	128102250	128103999	FALSE	Stable	4.05356	2.10647e-10	3.93922	1.37797e-11	0.364485	0.778353
2111	chr1	128244300	128244949	FALSE	Stable	3.11705	6.74019e-07	3.20636	2.61765e-08	0.500452	0.690159
2112	chr1	128359150	128359849	FALSE	Stable	3.80667	2.08332e-09	3.72071	1.49112e-10	0.588324	0.625391
2113	chr1	128360000	128360249	FALSE	Stable	2.13232	0.000562292	3.50359	1.4177e-09	0.40933	0.749388
2114	chr1	128416400	128417399	FALSE	Stable	3.95791	5.21774e-10	3.22235	2.24411e-08	0.628867	0.591579
2116	chr1	129537250	129537399	FALSE	Stable	2.28378	0.000226466	2.73884	1.72344e-06	0.536607	0.665844
2119	chr1	130507850	130508249	FALSE	Stable	2.31349	0.000187781	2.83956	7.28718e-07	-0.296797	0.820672
2121	chr1	130549550	130549799	FALSE	Stable	2.66188	1.90481e-05	2.06282	0.000292441	0.154275	0.911354
2122	chr1	130549900	130550099	FALSE	Stable	2.22775	0.000318142	2.62058	4.59345e-06	0.168573	0.903324
2123	chr1	130717100	130718049	TRUE	Stable	4.03353	2.5481e-10	2.70651	2.26423e-06	0.362502	0.779409
2126	chr1	131003850	131004049	FALSE	Stable	2.09517	0.000697395	3.54173	9.60337e-10	0.862006	0.379181
2127	chr1	131004450	131004549	FALSE	Stable	2.37765	0.000125382	2.53019	9.46054e-06	0.408856	0.749698
2128	chr1	131004600	131004749	FALSE	Stable	1.37246	0.0256997	4.17642	9.19618e-13	-0.0109299	0.993915
2129	chr1	131096900	131097849	TRUE	Stable	3.6545	8.09611e-09	3.15851	4.1001e-08	0.119379	0.931804
2130	chr1	131153300	131153749	FALSE	Stable	4.64009	5.8683e-13	2.76539	1.38277e-06	0.619929	0.598726
2133	chr1	131427100	131427299	FALSE	Stable	3.0618	1.03185e-06	1.5153	0.00772244	0.514712	0.680605
2134	chr1	131427800	131428149	FALSE	Stable	3.17959	4.12046e-07	1.50315	0.00823308	0.471952	0.71018
2135	chr1	131428300	131428449	FALSE	Stable	3.69666	5.55601e-09	2.23731	8.68139e-05	0.44692	0.726755
2137	chr1	131525150	131525249	FALSE	Stable	2.9064	3.31342e-06	1.64632	0.00379448	0.247643	0.850939
2138	chr1	131525600	131525949	FALSE	Stable	2.22012	0.000333599	2.89648	4.44311e-07	0.460096	0.718656
2139	chr1	131526150	131527349	FALSE	Stable	3.34016	1.13741e-07	2.97527	2.20283e-07	0.569943	0.640418
2140	chr1	131527950	131528549	FALSE	Stable	3.87599	1.11062e-09	2.15179	0.000158743	0.779558	0.454909
2141	chr1	131555050	131555249	FALSE	Stable	2.12261	0.000593286	2.3819	2.98748e-05	-0.280062	0.829133
2142	chr1	131657650	131657799	FALSE	Stable	3.63467	9.58427e-09	2.88787	4.79375e-07	-0.26564	0.838347
2143	chr1	131657850	131657949	FALSE	Stable	1.67386	0.00657657	2.46434	1.58763e-05	-0.229084	0.86472
2144	chr1	131797600	131797699	FALSE	Stable	1.86673	0.00246978	1.40291	0.0136902	0.443046	0.728594
2145	chr1	131827850	131828649	TRUE	Stable	3.84086	1.53083e-09	2.5076	1.13201e-05	0.809775	0.426963
2146	chr1	131909800	131911449	FALSE	Stable	4.41903	5.77759e-12	4.26342	3.33918e-13	0.421226	0.74219
2147	chr1	131971350	131971699	FALSE	Stable	4.53691	1.69249e-12	1.93724	0.000664309	0.257891	0.843114
2148	chr1	132004450	132004599	FALSE	Stable	2.6579	1.95686e-05	1.75193	0.00207366	0.878282	0.364758
2149	chr1	132007050	132008949	FALSE	Stable	4.35205	1.14356e-11	4.01583	5.86246e-12	0.29587	0.821079
2156	chr1	132334000	132334249	FALSE	Stable	2.63182	2.34123e-05	3.20693	2.60404e-08	0.399925	0.755452
2158	chr1	132417450	132417999	FALSE	Stable	3.08775	8.44434e-07	2.85154	6.59567e-07	0.439245	0.73157
2159	chr1	132419450	132419599	FALSE	Stable	1.34014	0.0293631	1.82294	0.00135663	0.492241	0.695703
2160	chr1	132419700	132419899	FALSE	Stable	2.883	3.94644e-06	1.54984	0.00643495	0.306212	0.813658
2162	chr1	132476850	132477799	TRUE	Stable	3.66605	7.32838e-09	3.92398	1.63322e-11	0.486758	0.699186
2163	chr1	132688250	132688449	FALSE	Stable	2.48617	6.22924e-05	3.94036	1.36157e-11	-0.462524	0.716719
2164	chr1	132688650	132688899	FALSE	Stable	2.82398	6.04896e-06	2.39823	2.63412e-05	0.39116	0.761356
2165	chr1	132689300	132690449	FALSE	Stable	3.33444	1.1932e-07	3.42464	3.12201e-09	0.385482	0.764306
2166	chr1	133024600	133025699	TRUE	Stable	4.24306	3.41155e-11	4.10301	2.16105e-12	0.401057	0.754531
2167	chr1	133046100	133046549	FALSE	Stable	3.7318	4.08647e-09	2.55304	7.91426e-06	0.728095	0.503052
2168	chr1	133130250	133131149	TRUE	Stable	3.28388	1.80277e-07	2.92772	3.37424e-07	0.617168	0.601425
2169	chr1	133131200	133132349	TRUE	Stable	4.63838	5.98381e-13	4.07581	2.95089e-12	0.345876	0.788984
2171	chr1	133188400	133188599	FALSE	Stable	3.15413	5.03889e-07	1.32509	0.0199181	-0.00790429	0.996051
2172	chr1	133397400	133397749	FALSE	Stable	4.04005	2.40095e-10	3.48241	1.75576e-09	-0.052214	0.973168
2173	chr1	133397850	133398199	FALSE	Stable	3.02527	1.36326e-06	2.12067	0.000196977	0.282298	0.827582
2174	chr1	133408250	133409099	FALSE	Stable	3.73012	4.14002e-09	2.51445	1.07237e-05	0.411774	0.747805
2175	chr1	133409400	133409699	FALSE	Stable	3.87716	1.10013e-09	1.92082	0.000738162	0.508478	0.684416
2177	chr1	133418350	133418449	FALSE	Stable	2.95486	2.30878e-06	3.54263	9.52479e-10	-0.587766	0.625883
2178	chr1	133423400	133423599	FALSE	Stable	3.07034	9.63493e-07	1.59801	0.00495787	0.6312	0.5894
2179	chr1	133423800	133424449	FALSE	Stable	2.2558	0.000268597	5.73055	8.60748e-22	0.317087	0.806715
2180	chr1	133448200	133448349	FALSE	Stable	2.64301	2.16161e-05	1.29159	0.0232457	0.741559	0.490631
2181	chr1	133448600	133448749	FALSE	Stable	2.83555	5.56889e-06	1.81404	0.00143243	1.00074	0.263713
2182	chr1	133492500	133493649	FALSE	Stable	2.53944	4.36547e-05	3.43754	2.75242e-09	0.0624768	0.966262
2183	chr1	133493750	133493949	FALSE	Stable	3.07034	9.63493e-07	2.24994	7.92414e-05	0.466106	0.713901
2184	chr1	133525100	133525499	FALSE	Stable	2.17025	0.000449287	3.12154	5.79157e-08	-0.335662	0.794646
2185	chr1	133526500	133526699	FALSE	Stable	4.03601	2.48864e-10	2.24464	8.2389e-05	-0.814251	0.423147
2186	chr1	133597000	133597149	FALSE	Stable	1.71835	0.00528213	2.80644	9.67857e-07	-0.113049	0.935504
2187	chr1	133609450	133610449	TRUE	Stable	5.65385	7.55168e-18	3.75153	1.07181e-10	0.471784	0.710358
2188	chr1	133660400	133661799	FALSE	Stable	3.98163	4.17276e-10	3.40609	3.76327e-09	0.536344	0.666073
2189	chr1	133695500	133695749	FALSE	Stable	2.24422	0.000287611	2.851	6.62602e-07	0.362739	0.779335
2190	chr1	133696150	133696549	FALSE	Stable	3.41609	6.13472e-08	1.42632	0.0121843	0.495274	0.693796
2191	chr1	133696700	133696799	FALSE	Stable	2.05815	0.000864152	1.83776	0.00124048	0.927429	0.323181
2192	chr1	133711300	133711499	FALSE	Stable	3.73548	3.94922e-09	1.74776	0.00212469	0.3862	0.763951
2193	chr1	133712550	133712799	FALSE	Stable	1.55153	0.0117394	2.96586	2.39754e-07	0.558608	0.649003
2198	chr1	133762100	133763949	TRUE	Stable	3.80967	2.03527e-09	3.17657	3.46555e-08	-0.241049	0.85577
2199	chr1	133766500	133767799	FALSE	Stable	3.08832	8.41016e-07	3.07321	9.07634e-08	-0.0247317	0.987218
2200	chr1	133767950	133768099	FALSE	Stable	2.54784	4.15439e-05	2.5511	8.0355e-06	0.382698	0.767054
2202	chr1	133841500	133841749	FALSE	Stable	1.79473	0.00359609	2.76219	1.41556e-06	0.813127	0.424271
2203	chr1	133841800	133842099	FALSE	Stable	3.34854	1.06583e-07	2.17778	0.000132475	0.725973	0.504898
2205	chr1	134060600	134060999	TRUE	Stable	3.51414	2.68826e-08	2.68943	2.60817e-06	-0.210956	0.876283
2206	chr1	134061100	134061449	TRUE	Stable	2.81461	6.47344e-06	2.69276	2.5346e-06	-0.178949	0.896895
2207	chr1	134062800	134063199	FALSE	Stable	2.75491	9.93362e-06	2.36175	3.47692e-05	0.034297	0.982963
2208	chr1	134063400	134063949	FALSE	Stable	3.63251	9.78089e-09	3.49324	1.58295e-09	0.326668	0.80068
2209	chr1	134064050	134064249	FALSE	Stable	3.18577	3.92899e-07	1.50715	0.00806102	0.064649	0.965174
2210	chr1	134078550	134078949	FALSE	Stable	2.0781	0.000770404	2.07966	0.000260829	0.378185	0.769769
2211	chr1	134079350	134079699	FALSE	Stable	2.597	2.9676e-05	2.76891	1.34254e-06	-0.207486	0.878315
2212	chr1	134080000	134080149	FALSE	Stable	1.89106	0.00217284	1.71394	0.0025837	-0.267655	0.837526
2213	chr1	134092400	134093849	FALSE	Stable	3.42805	5.54749e-08	3.54643	9.20154e-10	-0.158493	0.909086
2214	chr1	134098700	134099249	FALSE	Stable	2.94374	2.50847e-06	3.26438	1.50634e-08	0.0886833	0.951004
2215	chr1	134099400	134099599	FALSE	Stable	2.70195	1.43909e-05	2.09831	0.000229547	-0.237495	0.858674
2216	chr1	134193750	134193849	FALSE	Stable	2.0358	0.000979208	1.2537	0.0276829	-0.819423	0.418782
2217	chr1	134361300	134362649	TRUE	Stable	3.44007	5.01677e-08	2.5807	6.35778e-06	0.556716	0.650439
2218	chr1	134405600	134405899	TRUE	Stable	3.25535	2.26375e-07	1.48176	0.00920166	0.73791	0.49317
2219	chr1	134414750	134416349	TRUE	Stable	3.36787	9.11882e-08	3.39384	4.24855e-09	0.277947	0.830774
2220	chr1	134455550	134455899	FALSE	Stable	2.75425	9.97912e-06	2.82343	8.36153e-07	0.118227	0.93234
2221	chr1	134494250	134494349	TRUE	Stable	1.66523	0.00685644	1.83128	0.00128975	-0.197181	0.884853
2222	chr1	134494400	134494549	TRUE	Stable	2.10672	0.000651966	4.14695	1.29209e-12	0.530808	0.669793
2223	chr1	134494750	134494849	TRUE	Stable	1.76947	0.00408785	3.61681	4.44362e-10	-0.0667464	0.96399
2224	chr1	134495100	134495199	TRUE	Stable	1.75796	0.00433367	3.43858	2.72201e-09	-0.10679	0.939828
2225	chr1	134556300	134557099	FALSE	Stable	3.22901	2.78465e-07	3.26429	1.50687e-08	-0.0726376	0.961
2226	chr1	134560200	134561549	FALSE	Stable	4.83725	7.11729e-14	4.23522	4.62148e-13	0.241642	0.855447
2227	chr1	134774800	134775149	FALSE	Stable	3.19073	3.77675e-07	2.19005	0.000121465	0.159548	0.908662
2228	chr1	134786150	134786699	FALSE	Stable	3.93391	6.50136e-10	1.56612	0.0059004	0.16749	0.904274
2229	chr1	134787600	134788149	FALSE	Stable	2.6715	1.7839e-05	3.25527	1.638e-08	-0.257309	0.843585
2230	chr1	134788350	134788499	FALSE	Stable	2.71455	1.32086e-05	1.98236	0.000497772	-0.29476	0.821893
2231	chr1	134823600	134823849	FALSE	Stable	2.98677	1.82007e-06	1.50728	0.00805736	-0.720808	0.509469
2232	chr1	134823950	134824399	FALSE	Stable	1.82538	0.00306772	3.51786	1.22416e-09	-0.141461	0.918891
2233	chr1	134955700	134955849	FALSE	Stable	1.68725	0.00615409	1.99457	0.00045978	0.393934	0.759306
2234	chr1	134962100	134962349	FALSE	Stable	3.62971	1.00298e-08	1.81364	0.00143609	0.784279	0.450386
2235	chr1	134962600	134962849	FALSE	Stable	2.4738	6.74531e-05	1.22697	0.0311789	0.212607	0.875468
2237	chr1	135126600	135126749	FALSE	Stable	1.62155	0.00843466	1.75105	0.00208403	-1.15645	0.162148
2238	chr1	135127050	135127449	FALSE	Stable	3.30792	1.48127e-07	3.02323	1.42826e-07	0.574639	0.636876
2239	chr1	135146450	135146599	FALSE	Stable	2.19166	0.000395301	1.51244	0.00783848	-0.0887226	0.950979
2240	chr1	135146850	135147299	FALSE	Stable	5.32432	3.38615e-16	2.20796	0.000107169	0.626056	0.593755
2241	chr1	135153900	135154449	FALSE	Stable	3.43686	5.15373e-08	2.51642	1.05484e-05	0.00950493	0.994877
2242	chr1	135199050	135199199	FALSE	Stable	2.36354	0.000136935	2.1323	0.000182025	-0.378627	0.769477
2243	chr1	135232050	135232249	FALSE	Stable	3.75933	3.19033e-09	1.45325	0.0106325	1.29364	0.0985847
2244	chr1	135251150	135251249	FALSE	Stable	3.03994	1.22052e-06	1.33497	0.0190069	0.103453	0.941735
2245	chr1	135251900	135252049	FALSE	Stable	2.2933	0.00021339	1.90744	0.000803379	0.358182	0.782084
2246	chr1	135258550	135259249	FALSE	Stable	3.15515	5.00456e-07	2.34397	3.97119e-05	0.472952	0.709817
2247	chr1	135283500	135284149	FALSE	Stable	3.29857	1.59673e-07	1.88136	0.000945822	0.156366	0.910303
2248	chr1	135313050	135314099	FALSE	Stable	3.32848	1.2496e-07	3.50369	1.41745e-09	0.6434	0.57844
2249	chr1	135358650	135359149	FALSE	Stable	2.73872	1.11189e-05	3.56447	7.61674e-10	-0.0124587	0.993082
2250	chr1	135374400	135375149	TRUE	Stable	3.42924	5.49249e-08	3.50534	1.39256e-09	0.513665	0.681188
2252	chr1	135429300	135429599	FALSE	Stable	3.3317	1.2197e-07	2.26465	7.14315e-05	0.712755	0.516386
2253	chr1	135429700	135430549	FALSE	Stable	4.50805	2.29033e-12	4.40742	6.11096e-14	0.480378	0.70467
2254	chr1	135430800	135430999	FALSE	Stable	2.17801	0.00042856	1.7172	0.00253744	0.429672	0.736884
2256	chr1	135489050	135489699	FALSE	Stable	3.10688	7.29092e-07	2.75542	1.50013e-06	0.162295	0.907064
2257	chr1	135543350	135543499	FALSE	Stable	3.78729	2.4734e-09	1.20939	0.0336562	0.976385	0.283106
2259	chr1	135563750	135564649	FALSE	Stable	3.19376	3.68298e-07	2.87105	5.54496e-07	0.0913095	0.949487
2260	chr1	135564800	135564899	FALSE	Stable	1.312	0.0329311	1.65539	0.00360871	0.363656	0.778864
2262	chr1	135578300	135580199	TRUE	Stable	3.19909	3.53231e-07	3.3962	4.15795e-09	-0.446866	0.726844
2263	chr1	135580300	135580849	FALSE	Stable	2.99067	1.76941e-06	3.17938	3.37881e-08	-0.225602	0.867049
2265	chr1	135583000	135583149	FALSE	Stable	2.62158	2.50829e-05	1.45283	0.010656	-0.0860256	0.952857
2266	chr1	135583400	135584449	FALSE	Stable	3.31317	1.42094e-07	3.17756	3.43508e-08	-0.0640643	0.965601
2267	chr1	135659350	135659499	FALSE	Stable	1.50988	0.0141476	2.37587	3.12411e-05	0.517862	0.678115
2268	chr1	135660000	135660099	FALSE	Stable	2.17238	0.000443544	1.1882	0.0369179	0.366027	0.77749
2269	chr1	135660200	135660449	FALSE	Stable	2.37466	0.000127868	2.31962	4.75988e-05	0.242441	0.854897
2270	chr1	135687850	135688199	FALSE	Stable	3.40473	6.69744e-08	4.14985	1.25251e-12	0.229924	0.864075
2271	chr1	135728800	135729149	FALSE	Stable	3.54051	2.16118e-08	1.63495	0.00404617	0.4577	0.719798
2272	chr1	135729300	135729449	FALSE	Stable	1.37165	0.0257831	2.68458	2.71858e-06	0.0709233	0.961905
2273	chr1	135730900	135733099	FALSE	Stable	3.28149	1.83741e-07	3.72257	1.46052e-10	-0.30621	0.813658
2274	chr1	135739800	135740049	FALSE	Stable	2.39861	0.000109558	3.45624	2.28339e-09	-0.496239	0.693092
2275	chr1	135740800	135740999	FALSE	Stable	1.27978	0.0374707	2.01214	0.000408952	-0.0887626	0.950972
2276	chr1	135741250	135741549	FALSE	Stable	3.15864	4.8717e-07	1.88499	0.000924466	-0.563298	0.645914
2277	chr1	136017350	136017899	FALSE	Stable	2.7154	1.31377e-05	3.22435	2.2017e-08	0.456155	0.720785
2278	chr1	136018050	136018849	FALSE	Stable	3.89178	9.59014e-10	3.17528	3.51002e-08	0.236931	0.859107
2280	chr1	136131550	136131849	FALSE	Stable	2.35709	0.000142746	2.97131	2.28299e-07	0.0293822	0.985651
2281	chr1	136136750	136136899	FALSE	Stable	1.48203	0.0160426	2.39254	2.75404e-05	0.0562551	0.970243
2282	chr1	136137500	136137849	FALSE	Stable	1.93365	0.00172721	2.86953	5.61966e-07	0.407351	0.75074
2283	chr1	136140000	136140799	FALSE	Stable	3.78888	2.44157e-09	3.30994	9.66207e-09	0.259443	0.842226
2284	chr1	136230450	136230649	FALSE	Stable	2.25308	0.000272461	1.86167	0.00106831	-0.218448	0.87199
2285	chr1	136233250	136233899	FALSE	Stable	2.81251	6.56973e-06	3.20675	2.60859e-08	0.221392	0.869897
2286	chr1	136233950	136234649	TRUE	Stable	4.03719	2.46693e-10	3.48779	1.66304e-09	0.230453	0.863513
2287	chr1	136328000	136328549	FALSE	Stable	2.59265	3.05397e-05	2.09186	0.000240059	0.00420841	0.99765
2288	chr1	136345100	136346199	TRUE	Stable	4.23457	3.71704e-11	3.65733	2.93217e-10	0.537813	0.664822
2289	chr1	136415050	136415949	FALSE	Stable	4.20063	5.15069e-11	4.07154	3.09237e-12	0.197613	0.884614
2291	chr1	136417500	136417599	FALSE	Stable	2.40499	0.00010507	3.32602	8.30546e-09	-0.921027	0.328743
2292	chr1	136466450	136466899	FALSE	Stable	2.98117	1.90141e-06	2.64856	3.65896e-06	0.465979	0.713995
2293	chr1	136512750	136513149	FALSE	Stable	3.25581	2.255e-07	2.33207	4.33606e-05	0.569443	0.640985
2294	chr1	136513350	136513449	FALSE	Stable	1.28031	0.0374035	2.825	8.24905e-07	0.0291389	0.98569
2296	chr1	136587350	136587499	FALSE	Stable	2.54042	4.33633e-05	2.7553	1.50013e-06	0.77679	0.457408
2300	chr1	136625000	136625699	TRUE	Stable	3.57747	1.57256e-08	3.66294	2.76032e-10	0.462474	0.716782
2301	chr1	136768650	136768899	TRUE	Stable	3.08271	8.76244e-07	1.51826	0.00760535	0.116597	0.93321
2302	chr1	136769100	136769749	TRUE	Stable	3.42637	5.62873e-08	3.34026	7.21862e-09	0.173782	0.899876
2304	chr1	137322850	137323599	FALSE	Stable	1.91376	0.00192099	3.65178	3.11159e-10	0.117727	0.932693
2305	chr1	137323850	137324249	FALSE	Stable	2.81038	6.66925e-06	1.22655	0.0312308	0.653543	0.570126
2306	chr1	137332300	137332499	FALSE	Stable	1.62605	0.00827397	2.78204	1.19656e-06	-0.186477	0.891723
2307	chr1	137332950	137333249	FALSE	Stable	1.45154	0.0183095	2.5311	9.39581e-06	-0.693609	0.533924
2309	chr1	137371150	137371499	FALSE	Stable	2.7691	8.99588e-06	2.1576	0.0001524	-0.424174	0.740122
2310	chr1	137371700	137373849	TRUE	Stable	3.02564	1.35957e-06	3.58912	5.9107e-10	-0.252198	0.847569
2311	chr1	137374000	137374449	FALSE	Stable	2.23001	0.000313941	3.53767	9.98802e-10	-0.469059	0.712423
2312	chr1	137374750	137374999	FALSE	Stable	2.00276	0.0011802	1.79503	0.00160524	-0.288855	0.824379
2313	chr1	137376050	137376399	FALSE	Stable	2.74029	1.09913e-05	1.94726	0.000623819	-0.0903615	0.9501
2314	chr1	137387850	137388099	FALSE	Stable	2.82047	6.20831e-06	2.18733	0.000123791	0.27884	0.830014
2315	chr1	137388400	137388849	FALSE	Stable	2.80179	7.0977e-06	2.8268	8.14848e-07	-0.423935	0.740316
2316	chr1	137538650	137540749	TRUE	Stable	4.33534	1.35136e-11	3.51509	1.259e-09	0.26581	0.838242
2319	chr1	137564750	137565299	FALSE	Stable	3.12645	6.26794e-07	3.07728	8.74064e-08	0.598605	0.61627
2320	chr1	137565400	137566399	FALSE	Stable	4.04116	2.376e-10	2.78231	1.1938e-06	0.444195	0.728169
2321	chr1	137570250	137570549	FALSE	Stable	1.49111	0.0153997	2.57014	6.91268e-06	-0.371988	0.773808
2322	chr1	137573000	137573499	FALSE	Stable	2.90782	3.28388e-06	3.13888	4.93282e-08	-0.262191	0.840614
2323	chr1	137574050	137574299	FALSE	Stable	1.45919	0.0177113	2.73041	1.85198e-06	-0.3017	0.816889
2326	chr1	137592450	137592549	FALSE	Stable	3.03896	1.22741e-06	1.64632	0.00379448	0.380205	0.768383
2327	chr1	137635800	137635999	FALSE	Stable	1.41918	0.021072	3.05008	1.11962e-07	-0.072301	0.961031
2328	chr1	137649550	137649849	FALSE	Stable	3.22497	2.87955e-07	2.44644	1.82224e-05	1.33096	0.0848465
2329	chr1	137649950	137650399	FALSE	Stable	2.96335	2.17741e-06	2.53976	8.7877e-06	0.97303	0.28614
2330	chr1	137650500	137650899	FALSE	Stable	1.88032	0.00230159	2.9086	3.99257e-07	0.701673	0.526589
2331	chr1	137651150	137651399	FALSE	Stable	3.08448	8.65305e-07	3.09135	7.65777e-08	0.554532	0.652312
2332	chr1	137653550	137654699	FALSE	Stable	2.21859	0.000336652	3.88143	2.59681e-11	-0.212783	0.87543
2333	chr1	137657350	137657449	FALSE	Stable	1.75533	0.00438199	1.27893	0.0246483	-0.133453	0.924025
2336	chr1	137766600	137768199	FALSE	Stable	2.78235	8.1837e-06	3.39312	4.28045e-09	-0.457746	0.719786
2337	chr1	137768600	137768699	FALSE	Stable	1.96374	0.00146825	2.16649	0.000143288	0.358654	0.781827
2338	chr1	137774050	137774799	FALSE	Stable	4.31122	1.71774e-11	2.41482	2.32126e-05	0.859763	0.380388
2339	chr1	137775000	137775499	FALSE	Stable	3.36515	9.32084e-08	1.83134	0.00128933	0.499597	0.690328
2340	chr1	137775750	137775849	FALSE	Stable	3.30549	1.51036e-07	1.64632	0.00379448	0.646733	0.57575
2343	chr1	137898550	137901349	TRUE	Stable	4.8825	4.46951e-14	4.52831	1.41211e-14	0.195177	0.886345
2344	chr1	137901500	137901849	FALSE	Stable	4.55719	1.37373e-12	1.8356	0.00125646	0.70298	0.525818
2346	chr1	137906750	137907099	FALSE	Stable	2.19233	0.000393801	1.78152	0.00174012	-0.112664	0.935754
2347	chr1	137907200	137907499	FALSE	Stable	2.54525	4.21838e-05	2.60598	5.16699e-06	0.229219	0.864664
2348	chr1	137927550	137927699	FALSE	Stable	2.2773	0.000235444	1.78232	0.00173137	-0.114873	0.934383
2349	chr1	137928100	137928849	FALSE	Stable	2.89733	3.54411e-06	3.0327	1.30913e-07	0.656986	0.566617
2350	chr1	137940000	137940299	FALSE	Stable	2.40633	0.000104169	1.99973	0.00044437	-0.203259	0.880803
2352	chr1	137941100	137941899	FALSE	Stable	3.41892	5.99832e-08	2.28325	6.21129e-05	1.09936	0.196387
2353	chr1	137941950	137942099	FALSE	Stable	2.68813	1.58395e-05	1.37504	0.0156862	0.958789	0.296399
2354	chr1	137942450	137942599	FALSE	Stable	2.7396	1.10456e-05	2.12752	0.000188085	0.591308	0.622441
2355	chr1	137972150	137973049	FALSE	Stable	3.37585	8.50862e-08	3.60299	5.13397e-10	0.362622	0.779409
2356	chr1	137973700	137974449	FALSE	Stable	3.69258	5.76509e-09	2.97363	2.23697e-07	0.68337	0.544514
2357	chr1	138022400	138024949	TRUE	Stable	3.94306	5.98558e-10	3.09175	7.64133e-08	0.0947423	0.947289
2360	chr1	138130800	138130999	FALSE	Stable	1.57239	0.0106333	2.99735	1.80901e-07	-0.0411037	0.978671
2361	chr1	138131600	138131949	FALSE	Stable	2.39588	0.000111478	3.07154	9.21476e-08	-0.224405	0.867726
2362	chr1	138132050	138132199	FALSE	Stable	2.13463	0.000555432	2.2321	9.01531e-05	-0.128609	0.926479
2363	chr1	138159550	138161949	FALSE	Stable	4.26233	2.80524e-11	3.6888	2.09518e-10	-0.143896	0.917493
2364	chr1	138162050	138162349	FALSE	Stable	1.43835	0.0193895	2.78919	1.12291e-06	0.291712	0.823235
2366	chr1	138204600	138205199	FALSE	Stable	2.565	3.68695e-05	3.666	2.67186e-10	0.126867	0.92751
2367	chr1	138205250	138206249	FALSE	Stable	3.34676	1.08205e-07	3.8781	2.6931e-11	-0.178183	0.897207
2368	chr1	138206500	138207449	FALSE	Stable	3.44851	4.6877e-08	3.86916	2.98173e-11	-0.137833	0.921432
2369	chr1	138207500	138207649	FALSE	Stable	3.34446	1.10116e-07	4.26801	3.15843e-13	0.0681108	0.963305
2370	chr1	138207750	138207899	FALSE	Stable	2.23353	0.000307262	1.4672	0.00991763	0.738644	0.492618
2371	chr1	138244700	138244899	FALSE	Stable	2.94908	2.41345e-06	2.36748	3.32897e-05	0.560829	0.647244
2372	chr1	138246800	138246899	FALSE	Stable	2.47323	6.76659e-05	2.12752	0.000188085	0.324936	0.801789
2373	chr1	138247200	138248549	TRUE	Stable	3.75215	3.39828e-09	3.23087	2.07064e-08	-0.169975	0.902299
2374	chr1	138248700	138249299	FALSE	Stable	2.46255	7.26224e-05	2.42151	2.20764e-05	-0.345089	0.789289
2375	chr1	138280800	138280999	FALSE	Stable	1.4528	0.0182104	3.09135	7.65777e-08	-0.663509	0.561471
2376	chr1	138281600	138281799	FALSE	Stable	4.2038	5.00804e-11	3.05026	1.11869e-07	-0.447974	0.726264
2377	chr1	138281950	138282099	FALSE	Stable	2.62731	2.41467e-05	2.12455	0.00019189	-0.945106	0.308262
2378	chr1	138282150	138282699	FALSE	Stable	2.4088	0.00010251	2.39058	2.79543e-05	-0.467561	0.713473
2379	chr1	138283000	138283899	FALSE	Stable	1.61	0.00891776	3.10871	6.5271e-08	-1.19664	0.140222
2380	chr1	138326400	138326649	FALSE	Stable	2.39775	0.000110101	1.93831	0.000660173	-0.574781	0.636864
2381	chr1	138326700	138326899	FALSE	Stable	2.75385	1.00053e-05	3.11615	6.07211e-08	-0.389992	0.762118
2383	chr1	138327600	138327749	FALSE	Stable	1.85692	0.00260194	3.65142	3.12141e-10	-0.49837	0.691452
2384	chr1	138328550	138328799	FALSE	Stable	3.23524	2.65163e-07	1.74035	0.00221968	0.460678	0.718388
2385	chr1	138328950	138329199	FALSE	Stable	1.37359	0.0255758	2.15082	0.000159826	-0.229286	0.864606
2386	chr1	138341600	138341749	FALSE	Stable	1.28149	0.0372303	1.96053	0.000572663	0.295994	0.821073
2387	chr1	138342900	138343299	FALSE	Stable	2.43709	8.56314e-05	2.37154	3.23227e-05	0.030956	0.984642
2388	chr1	138343450	138343599	FALSE	Stable	1.93266	0.00173641	2.31073	5.08173e-05	0.396354	0.758279
2389	chr1	138343750	138343849	FALSE	Stable	1.51386	0.0138946	2.47047	1.51575e-05	-0.182185	0.894807
2390	chr1	138343900	138345149	TRUE	Stable	4.08697	1.52486e-10	3.60821	4.85997e-10	0.275327	0.832422
2391	chr1	138345200	138347549	TRUE	Stable	4.2167	4.41943e-11	4.23881	4.43429e-13	0.172003	0.900981
2392	chr1	138348500	138348799	FALSE	Stable	2.43405	8.73744e-05	1.98454	0.000491405	0.22085	0.870612
2393	chr1	138384400	138385199	TRUE	Stable	3.72787	4.22629e-09	1.71926	0.00250644	1.23278	0.123426
2394	chr1	138385300	138386299	TRUE	Stable	3.14854	5.26628e-07	2.46234	1.61397e-05	1.19965	0.139088
2395	chr1	138386450	138386649	FALSE	Stable	2.92511	2.88583e-06	2.14659	0.000164682	1.16448	0.157577
2396	chr1	138386850	138387099	FALSE	Stable	2.68178	1.65699e-05	1.46592	0.00998286	1.18818	0.144609
2397	chr1	138419550	138419799	FALSE	Stable	2.66219	1.90254e-05	1.2346	0.0301448	0.0708254	0.961905
2398	chr1	138420000	138421149	FALSE	Stable	3.33728	1.16469e-07	3.27332	1.38489e-08	0.287433	0.825223
2399	chr1	138421350	138422649	FALSE	Stable	3.80345	2.14438e-09	3.54109	9.66504e-10	0.284033	0.827033
2400	chr1	138423600	138423799	FALSE	Stable	2.89597	3.5802e-06	2.5749	6.65966e-06	-0.288785	0.824402
2401	chr1	138424550	138424699	FALSE	Stable	1.5289	0.0129759	2.57115	6.85612e-06	-0.0672116	0.96378
2403	chr1	138501150	138501449	FALSE	Stable	2.02205	0.00105872	3.35682	6.13422e-09	0.223833	0.868076
2404	chr1	138515950	138516049	FALSE	Stable	2.45381	7.67435e-05	2.18342	0.000127376	0.270386	0.835602
2406	chr1	138523050	138523299	FALSE	Stable	1.66126	0.00698637	3.17462	3.52759e-08	0.0452421	0.976271
2407	chr1	138523500	138523699	FALSE	Stable	2.96149	2.20472e-06	2.57115	6.85612e-06	0.951736	0.303048
2409	chr1	138524250	138524999	FALSE	Stable	3.19737	3.58028e-07	2.67861	2.85849e-06	0.299264	0.81921
2411	chr1	138617450	138618199	FALSE	Stable	2.94323	2.51841e-06	3.0679	9.51503e-08	0.201788	0.881658
2412	chr1	138618750	138619099	FALSE	Stable	3.24542	2.45012e-07	2.16277	0.000147023	-0.121831	0.9304
2413	chr1	138619300	138620199	FALSE	Stable	4.09262	1.44273e-10	3.62548	4.07254e-10	0.12892	0.926171
2414	chr1	138719850	138720199	FALSE	Stable	2.9768	1.96474e-06	1.42748	0.0121123	0.665923	0.55921
2415	chr1	138720450	138720799	FALSE	Stable	3.29291	1.67217e-07	1.63323	0.00408467	1.4021	0.0618654
2416	chr1	138721050	138721499	FALSE	Stable	3.28992	1.71474e-07	1.62865	0.00419099	0.948133	0.306033
2417	chr1	138762450	138762649	FALSE	Stable	1.34257	0.0290847	2.19005	0.000121465	-0.369206	0.77528
2418	chr1	138763100	138763849	FALSE	Stable	4.35322	1.13222e-11	2.6303	4.2499e-06	-0.313988	0.808555
2419	chr1	138764150	138764549	FALSE	Stable	2.49584	5.83483e-05	2.80195	1.00676e-06	-0.603179	0.612454
2422	chr1	138767750	138767999	FALSE	Stable	1.83762	0.00287736	2.92599	3.42414e-07	-0.118859	0.932117
2424	chr1	138783250	138783599	FALSE	Stable	1.59278	0.00967048	3.28547	1.22989e-08	-0.141661	0.918734
2425	chr1	138783650	138784899	FALSE	Stable	2.40432	0.0001055	3.48364	1.73375e-09	0.028331	0.985847
2426	chr1	138826500	138826649	FALSE	Stable	1.63178	0.00805383	2.40592	2.48357e-05	0.799687	0.436077
2427	chr1	138834250	138834349	FALSE	Stable	1.84335	0.00279569	1.84278	0.00120291	-0.0202021	0.989441
2428	chr1	138835750	138835899	FALSE	Stable	1.98497	0.00130447	1.85203	0.00113553	0.101797	0.942728
2429	chr1	138836250	138845049	TRUE	Stable	4.58272	1.05701e-12	4.9055	1.15516e-16	-0.0246738	0.987251
2430	chr1	138845150	138847749	FALSE	Stable	3.77006	2.90202e-09	4.36694	9.85215e-14	-0.506173	0.68624
2431	chr1	138847900	138849899	FALSE	Stable	4.08154	1.60652e-10	4.28237	2.68129e-13	-0.4336	0.734413
2432	chr1	138853150	138853499	FALSE	Stable	2.69132	1.54933e-05	2.14733	0.000163863	-0.492649	0.695432
2433	chr1	138853650	138854199	FALSE	Stable	2.89517	3.60152e-06	3.08622	8.02139e-08	-0.0342785	0.982974
2434	chr1	138854350	138854599	FALSE	Stable	2.1638	0.000467057	3.12131	5.80366e-08	-0.506255	0.686233
2435	chr1	138854650	138854949	FALSE	Stable	1.81203	0.00328475	2.62553	4.41211e-06	-0.335227	0.794982
2436	chr1	138855950	138856899	TRUE	Stable	4.02051	2.87914e-10	3.87958	2.65243e-11	-0.0341543	0.982974
2438	chr1	138875650	138875999	FALSE	Stable	2.35371	0.000145858	3.07225	9.15927e-08	-0.166118	0.905404
2439	chr1	138876150	138876349	FALSE	Stable	1.85321	0.00265349	3.0416	1.20917e-07	-0.218877	0.871622
2440	chr1	138876400	138877149	FALSE	Stable	2.4953	5.85609e-05	2.86057	6.08763e-07	-0.234363	0.860648
2441	chr1	138930900	138930999	FALSE	Stable	2.78166	8.22032e-06	1.15378	0.0427814	0.0263632	0.986486
2442	chr1	138963350	138963699	TRUE	Stable	3.3779	8.36246e-08	3.40766	3.70235e-09	0.35619	0.783085
2443	chr1	138963800	138964549	TRUE	Stable	2.48159	6.40674e-05	3.80426	6.02748e-11	0.12739	0.92727
2445	chr1	139047950	139050399	FALSE	Stable	4.11859	1.1272e-10	3.13777	4.98564e-08	0.384908	0.764956
2447	chr1	139087850	139088649	FALSE	Stable	3.92703	6.93475e-10	2.67737	2.88895e-06	-0.0494572	0.974355
2449	chr1	139090150	139090449	FALSE	Stable	2.51175	5.25014e-05	3.46239	2.1439e-09	-0.38924	0.762502
2450	chr1	139090650	139094849	TRUE	Stable	4.83883	7.00618e-14	4.8422	2.67713e-16	0.0471643	0.975355
2451	chr1	139094950	139095199	FALSE	Stable	2.70705	1.39129e-05	2.2307	9.10866e-05	-0.043701	0.977226
2452	chr1	139095250	139095449	FALSE	Stable	3.12089	6.53838e-07	1.54016	0.00678055	-0.0332291	0.983504
2453	chr1	139095500	139095649	FALSE	Stable	1.68389	0.00625518	2.61161	4.94464e-06	-0.220674	0.870613
2454	chr1	139095800	139095999	FALSE	Stable	1.25351	0.0415037	2.17467	0.000135291	-0.18013	0.896402
2455	chr1	139097150	139097599	FALSE	Stable	2.33014	0.000169033	2.39766	2.64565e-05	-0.103096	0.941977
2456	chr1	139192700	139193199	FALSE	Stable	3.03539	1.25796e-06	2.649	3.64632e-06	0.157728	0.909401
2457	chr1	139193500	139194049	TRUE	Stable	2.79717	7.33582e-06	3.05324	1.08753e-07	0.290985	0.823292
2458	chr1	139194250	139194649	TRUE	Stable	2.85128	4.97094e-06	3.05725	1.04715e-07	0.272299	0.834363
2459	chr1	139194700	139195349	FALSE	Stable	3.18647	3.90732e-07	3.70039	1.84789e-10	0.324686	0.80187
2460	chr1	139195400	139195649	FALSE	Stable	2.35448	0.000145153	2.03249	0.000357848	0.455362	0.721262
2461	chr1	139195900	139196549	FALSE	Stable	2.41953	9.59785e-05	2.85004	6.67923e-07	-0.00796277	0.996042
2463	chr1	139204750	139204899	FALSE	Stable	1.64892	0.00741182	2.25073	7.87788e-05	0.373227	0.772906
2465	chr1	139206850	139207749	TRUE	Stable	2.62057	2.52488e-05	3.38291	4.73739e-09	-0.331517	0.797715
2466	chr1	139208200	139209299	TRUE	Stable	2.61533	2.61718e-05	3.36191	5.84828e-09	-0.50522	0.686843
2468	chr1	139209850	139210299	FALSE	Stable	3.4047	6.69744e-08	2.33478	4.25104e-05	-0.286844	0.825445
2470	chr1	139211450	139211599	FALSE	Stable	1.76782	0.00412067	2.74744	1.60323e-06	-0.593669	0.620283
2471	chr1	139212000	139212699	FALSE	Stable	1.9603	0.00149363	3.31295	9.37996e-09	-0.6514	0.571477
2472	chr1	139213950	139214149	FALSE	Stable	1.35615	0.0274847	3.00289	1.72227e-07	-0.671702	0.554778
2473	chr1	139244800	139244949	FALSE	Stable	1.42095	0.0209098	3.0581	1.03852e-07	-0.645486	0.576492
2474	chr1	139245400	139245749	FALSE	Stable	2.91549	3.10595e-06	2.77959	1.22149e-06	0.108215	0.938726
2475	chr1	139246100	139248549	FALSE	Stable	3.09453	8.035e-07	3.89889	2.15096e-11	-0.351459	0.785857
2477	chr1	139421800	139422949	TRUE	Stable	4.00071	3.4886e-10	3.40971	3.6283e-09	0.41396	0.747134
2478	chr1	139453800	139455499	FALSE	Stable	4.48634	2.86758e-12	3.93804	1.39561e-11	0.557121	0.650206
2479	chr1	140253650	140253749	FALSE	Stable	2.85965	4.6836e-06	1.46801	0.00987953	-0.20988	0.8772
2480	chr1	140357800	140357999	FALSE	Stable	2.7328	1.15879e-05	1.97463	0.000522875	-0.268775	0.836651
2481	chr1	140358150	140358299	FALSE	Stable	3.40592	6.64066e-08	1.74286	0.00218617	0.650623	0.572399
2484	chr1	140391150	140391249	FALSE	Stable	1.96156	0.00148356	2.04523	0.000328668	-0.0836777	0.954522
2485	chr1	140408650	140409199	FALSE	Stable	3.37165	8.82539e-08	1.42982	0.0119734	0.582848	0.630758
2486	chr1	140409300	140409449	FALSE	Stable	2.93327	2.71078e-06	2.85635	6.31988e-07	0.0561478	0.970256
2487	chr1	140409950	140410249	FALSE	Stable	2.92803	2.82073e-06	2.23722	8.68441e-05	0.66312	0.561702
2488	chr1	141144750	141145049	FALSE	Stable	3.58658	1.45574e-08	2.57143	6.84517e-06	0.00271392	0.998614
2493	chr1	142169900	142169999	FALSE	Stable	1.63212	0.00804374	1.90927	0.000794887	0.71451	0.514881
2494	chr1	142171000	142171199	FALSE	Stable	3.80913	2.04074e-09	1.14101	0.0451268	0.649507	0.573323
2495	chr1	143619550	143619699	FALSE	Stable	2.0473	0.000918156	2.43955	1.92177e-05	-0.413026	0.747589
2497	chr1	143702150	143702899	TRUE	Stable	3.81691	1.90722e-09	2.95085	2.74082e-07	0.539161	0.664003
2498	chr1	143739550	143740049	FALSE	Stable	2.54616	4.19809e-05	2.96236	2.47341e-07	0.44019	0.731001
2499	chr1	143777350	143777749	FALSE	Stable	2.78019	8.30764e-06	2.95006	2.76117e-07	0.445754	0.727402
2501	chr1	143990600	143990699	FALSE	Stable	1.95825	0.0015095	2.53185	9.34544e-06	-0.594382	0.619967
2503	chr1	144004450	144004599	FALSE	Stable	2.81687	6.36659e-06	1.70584	0.0027084	0.492873	0.695151
2505	chr1	144305800	144305999	FALSE	Stable	2.23984	0.000295645	1.43583	0.0116156	0.44971	0.725486
2506	chr1	144306900	144307149	FALSE	Stable	2.93077	2.76251e-06	2.1607	0.00014905	0.00213192	0.998688
2507	chr1	144307250	144307599	FALSE	Stable	3.26228	2.13879e-07	3.41289	3.5126e-09	0.410787	0.748712
2509	chr1	144693650	144693749	FALSE	Stable	2.12261	0.000593286	1.15124	0.0432352	0.950592	0.303961
2511	chr1	144695500	144695599	FALSE	Stable	1.91742	0.00188666	2.4243	2.15961e-05	0.468164	0.713303
2512	chr1	144695700	144695849	FALSE	Stable	2.64473	2.13743e-05	1.24654	0.028582	0.78833	0.447178
2513	chr1	144696350	144696499	FALSE	Stable	1.69551	0.00591332	1.17197	0.0396011	-0.0946204	0.947346
2514	chr1	145064800	145064899	FALSE	Stable	2.7746	8.64833e-06	1.43748	0.0115178	1.33712	0.0824923
2515	chr1	145065100	145065299	FALSE	Stable	2.49048	6.05169e-05	1.27491	0.0250913	1.18788	0.14466
2516	chr1	145500350	145500599	FALSE	Stable	1.53746	0.0124792	3.33162	7.87478e-09	-1.23277	0.123426
2517	chr1	146359150	146359599	FALSE	Stable	2.78505	8.02876e-06	2.58576	6.1067e-06	0.171605	0.901131
2523	chr1	149923550	149923699	FALSE	Stable	2.6152	2.61718e-05	1.732	0.0023293	0.883192	0.360451
2524	chr1	149960950	149961449	FALSE	Stable	2.27444	0.000239488	2.10541	0.000218772	0.548776	0.656684
2525	chr1	150164450	150164599	FALSE	Stable	3.70621	5.13423e-09	1.75853	0.00199508	0.346159	0.788822
2526	chr1	150164650	150165199	FALSE	Stable	1.91974	0.00186445	3.01679	1.51621e-07	-0.549103	0.656239
2527	chr1	150165300	150166099	FALSE	Stable	2.50492	5.49879e-05	3.81781	5.22308e-11	-0.819842	0.418559
2528	chr1	150392250	150392649	FALSE	Stable	2.76974	8.95724e-06	1.2508	0.0280499	0.704289	0.525022
2529	chr1	150392750	150393149	FALSE	Stable	2.3708	0.000131166	2.9404	3.01662e-07	0.509775	0.683567
2530	chr1	150393250	150393949	FALSE	Stable	3.31934	1.35002e-07	4.07285	3.04762e-12	0.696549	0.531524
2534	chr1	150479850	150480699	FALSE	Stable	3.04056	1.21633e-06	2.506	1.14639e-05	0.133059	0.924283
2535	chr1	150480800	150481749	FALSE	Stable	3.32606	1.27496e-07	3.61985	4.32508e-10	-0.0907423	0.949942
2537	chr1	150535050	150535999	FALSE	Stable	3.75902	3.20026e-09	2.24871	7.9979e-05	0.401277	0.754499
2538	chr1	150536150	150538899	FALSE	Stable	4.55453	1.40927e-12	4.24099	4.32141e-13	-0.0570659	0.969979
2539	chr1	150539000	150540149	FALSE	Stable	3.4983	3.08029e-08	3.21338	2.44981e-08	-0.49144	0.696149
2540	chr1	150541800	150541949	FALSE	Stable	3.24309	2.48691e-07	1.48695	0.00896263	0.154616	0.911228
2541	chr1	150545150	150545249	FALSE	Stable	1.55021	0.0117976	2.40592	2.48357e-05	0.718118	0.511986
2543	chr1	150545950	150546599	FALSE	Stable	1.22618	0.04618	4.14805	1.27868e-12	-0.838377	0.40123
2544	chr1	150569850	150569949	FALSE	Stable	1.57349	0.0105772	1.68564	0.00304343	-0.55693	0.650343
2545	chr1	150570350	150571349	FALSE	Stable	3.37021	8.93977e-08	3.36152	5.86569e-09	-0.166389	0.905144
2547	chr1	150593250	150593699	FALSE	Stable	3.10005	7.68624e-07	2.55552	7.75622e-06	0.508953	0.684018
2548	chr1	150593850	150594149	FALSE	Stable	2.59914	2.92254e-05	1.46468	0.0100442	0.735526	0.495653
2551	chr1	150610200	150610549	FALSE	Stable	3.38736	7.73826e-08	2.36598	3.36604e-05	0.403217	0.753307
2552	chr1	150611150	150611399	FALSE	Stable	2.98078	1.90606e-06	1.30039	0.022329	0.330273	0.798502
2554	chr1	150681050	150683299	TRUE	Stable	4.18013	6.26118e-11	3.78642	7.35585e-11	-0.110542	0.937071
2555	chr1	150683450	150683699	FALSE	Stable	2.47406	6.73453e-05	2.50837	1.12475e-05	-0.331375	0.797776
2556	chr1	150684000	150684149	FALSE	Stable	1.70161	0.00573579	2.29075	5.88027e-05	-0.616824	0.601513
2558	chr1	150705850	150706049	FALSE	Stable	1.3057	0.0338023	2.62457	4.44355e-06	-0.349356	0.787356
2559	chr1	150706100	150706599	FALSE	Stable	3.00337	1.60477e-06	3.24827	1.74856e-08	0.0815555	0.955856
2560	chr1	150706900	150707949	FALSE	Stable	2.93328	2.71078e-06	3.74243	1.18486e-10	-0.0681272	0.963305
2562	chr1	150742600	150742699	FALSE	Stable	1.4528	0.0182104	3.0581	1.03852e-07	0.382175	0.767411
2563	chr1	150743050	150743499	FALSE	Stable	3.5894	1.42126e-08	2.78256	1.19122e-06	0.509775	0.683567
2564	chr1	150769450	150771499	FALSE	Stable	3.86313	1.24824e-09	2.76399	1.39633e-06	0.456211	0.72077
2565	chr1	150775700	150776099	FALSE	Stable	4.46631	3.53127e-12	3.24937	1.73014e-08	0.607086	0.60957
2567	chr1	150815850	150815999	FALSE	Stable	2.41426	9.90735e-05	2.6652	3.18798e-06	0.740717	0.491143
2568	chr1	150816400	150816549	FALSE	Stable	2.4564	7.5582e-05	1.64632	0.00379448	1.37148	0.0712562
2569	chr1	150829600	150829799	FALSE	Stable	2.7328	1.15879e-05	1.83562	0.00125646	0.876404	0.366444
2571	chr1	150907250	150907349	FALSE	Stable	2.54769	4.15691e-05	1.45658	0.0104589	-0.510413	0.68305
2572	chr1	150933400	150933499	FALSE	Stable	2.4716	6.83476e-05	3.42713	3.04262e-09	0.036132	0.981926
2574	chr1	150950550	150950899	TRUE	Stable	2.76394	9.31899e-06	1.28417	0.024058	1.44419	0.0514256
2575	chr1	150991450	150991699	TRUE	Stable	2.97158	2.04222e-06	1.27743	0.024821	0.810752	0.426285
2576	chr1	150991800	150992149	TRUE	Stable	3.07343	9.42106e-07	3.22887	2.11299e-08	0.618981	0.599403
2577	chr1	150992300	150993799	TRUE	Stable	3.94937	5.64617e-10	2.8369	7.46285e-07	0.902669	0.344043
2578	chr1	150994300	150994549	FALSE	Stable	4.04766	2.23119e-10	2.0648	0.000288488	1.37301	0.0707906
2582	chr1	151062300	151062549	FALSE	Stable	2.01508	0.00110109	2.49657	1.23665e-05	0.485276	0.700723
2584	chr1	151118450	151118699	FALSE	Stable	2.46738	7.03733e-05	2.05093	0.000316497	0.383238	0.766582
2587	chr1	151344450	151345799	FALSE	Stable	4.50329	2.41347e-12	3.63334	3.76005e-10	0.294087	0.821992
2588	chr1	151427950	151428449	TRUE	Stable	3.01801	1.43861e-06	1.33859	0.0186912	0.642081	0.579603
2589	chr1	151428650	151429399	TRUE	Stable	4.03828	2.43904e-10	3.13517	5.09843e-08	0.522996	0.674846
2590	chr1	151499600	151500949	TRUE	Stable	5.2087	1.30954e-15	4.55646	1.0097e-14	0.333283	0.796589
2591	chr1	151501000	151501499	TRUE	Stable	2.65401	2.00738e-05	3.26448	1.50479e-08	-0.0610311	0.96756
2592	chr1	151686150	151686299	FALSE	Stable	2.66398	1.87884e-05	1.20648	0.034083	0.430546	0.736217
2593	chr1	151755150	151755699	TRUE	Stable	3.41619	6.12896e-08	2.02432	0.000377467	0.355227	0.783529
2594	chr1	151759100	151759599	FALSE	Stable	2.77022	8.92937e-06	2.86656	5.77177e-07	-0.546997	0.658501
2596	chr1	151760750	151760999	FALSE	Stable	1.39969	0.0228831	3.22509	2.18698e-08	0.162073	0.907318
2597	chr1	151763400	151763749	FALSE	Stable	2.40433	0.000105497	2.76867	1.34522e-06	-0.397553	0.757278
2598	chr1	151764200	151764299	FALSE	Stable	1.85112	0.0026817	1.8829	0.000936909	-0.0525487	0.973042
2601	chr1	152089850	152090349	TRUE	Stable	3.07655	9.20349e-07	2.49479	1.25335e-05	0.547166	0.658501
2603	chr1	152588300	152588799	FALSE	Stable	3.66234	7.57409e-09	1.76879	0.00187847	0.273334	0.833641
2604	chr1	152589450	152591349	FALSE	Stable	3.71153	4.89474e-09	2.33864	4.13299e-05	0.930561	0.320469
2607	chr1	152623900	152625899	TRUE	Stable	4.28787	2.17447e-11	3.8848	2.49844e-11	0.600001	0.61514
2608	chr1	152687000	152688149	FALSE	Stable	4.56433	1.27827e-12	3.37924	4.905e-09	0.524633	0.6742
2609	chr1	152713050	152713249	FALSE	Stable	2.50567	5.47017e-05	1.40698	0.0134158	0.48053	0.704599
2610	chr1	152713750	152715749	FALSE	Stable	4.19381	5.47891e-11	3.41532	3.42655e-09	0.642154	0.579567
2611	chr1	152717350	152717499	FALSE	Stable	2.24824	0.000280535	2.04769	0.000323569	0.586508	0.62689
2613	chr1	152766800	152767449	FALSE	Stable	3.25067	2.34924e-07	2.52856	9.5832e-06	0.335974	0.794469
2614	chr1	152901750	152902699	FALSE	Stable	3.47625	3.72124e-08	4.05349	3.83826e-12	0.454924	0.721478
2615	chr1	152902750	152903399	FALSE	Stable	7.65767	3.91374e-32	3.80795	5.82142e-11	0.367748	0.776421
2616	chr1	152903500	152903899	FALSE	Stable	2.86478	4.51711e-06	2.6977	2.43354e-06	0.589615	0.623939
2617	chr1	153048500	153048699	FALSE	Stable	3.43082	5.41806e-08	3.31178	9.48543e-09	1.1107	0.189579
2621	chr1	153096100	153096649	FALSE	Stable	3.24309	2.48691e-07	1.33087	0.0193716	0.759945	0.472224
2622	chr1	153096700	153097149	FALSE	Stable	2.90888	3.25901e-06	3.84825	3.73737e-11	0.61418	0.603639
2623	chr1	153172550	153172699	FALSE	Stable	3.9049	8.5062e-10	3.17892	3.39061e-08	0.725973	0.504898
2625	chr1	153282300	153282649	FALSE	Stable	3.815	1.93853e-09	3.14126	4.83754e-08	0.652962	0.570558
2628	chr1	153284450	153285099	FALSE	Stable	4.22448	4.10084e-11	2.15486	0.000155342	-0.130672	0.925482
2629	chr1	153291150	153291549	FALSE	Stable	1.69551	0.00591332	3.3195	8.83734e-09	-0.648953	0.573757
2631	chr1	153292050	153292249	FALSE	Stable	1.96221	0.00147892	2.24309	8.32781e-05	-0.725661	0.505142
2632	chr1	153332350	153332899	TRUE	Stable	2.72595	1.21716e-05	3.25342	1.66785e-08	0.328931	0.799579
2633	chr1	153486600	153488399	TRUE	Stable	4.18757	5.81778e-11	3.03242	1.31284e-07	0.358008	0.782126
2634	chr1	153532200	153532649	FALSE	Stable	1.9952	0.00123183	3.03921	1.23759e-07	-0.37184	0.773808
2635	chr1	153642300	153642499	FALSE	Stable	1.96043	0.0014925	4.29799	2.22789e-13	-0.763723	0.468209
2636	chr1	153701750	153702549	FALSE	Stable	2.14324	0.000526941	3.2768	1.34142e-08	-0.239132	0.857177
2637	chr1	153702600	153702849	FALSE	Stable	3.64639	8.65119e-09	2.11687	0.000202268	-0.0844545	0.954082
2638	chr1	153749000	153749999	FALSE	Stable	3.44777	4.71907e-08	2.96274	2.46527e-07	0.446719	0.726865
2639	chr1	153899150	153899799	TRUE	Stable	3.77878	2.67432e-09	4.09007	2.51426e-12	0.181752	0.895178
2640	chr1	153899900	153901099	TRUE	Stable	4.42308	5.53403e-12	3.58175	6.36568e-10	0.709388	0.519506
2644	chr1	154112850	154113099	FALSE	Stable	1.58902	0.00984128	2.76081	1.4327e-06	-0.619359	0.599064
2645	chr1	154113600	154113749	FALSE	Stable	1.5127	0.0139695	1.74333	0.00218188	-0.265224	0.838583
2646	chr1	154113950	154114149	FALSE	Stable	4.07978	1.62959e-10	2.16286	0.000146922	-0.424861	0.739894
2648	chr1	154183050	154183399	FALSE	Stable	1.93752	0.00169043	3.06284	9.96077e-08	-0.350899	0.786171
2649	chr1	154183450	154183649	FALSE	Stable	4.06431	1.89629e-10	1.86691	0.00103456	-0.408229	0.750349
2650	chr1	154704050	154704849	FALSE	Stable	3.29231	1.68042e-07	3.10693	6.63008e-08	0.149062	0.914372
2651	chr1	154705050	154705549	FALSE	Stable	3.29664	1.62178e-07	2.20023	0.00011306	0.281761	0.828002
2653	chr1	155055200	155055449	FALSE	Stable	2.4564	7.5582e-05	3.95205	1.18792e-11	0.0781796	0.957296
2654	chr1	155082350	155083449	TRUE	Stable	4.73676	2.03167e-13	5.34191	2.86121e-19	0.355894	0.783151
2655	chr1	155083600	155084449	TRUE	Stable	3.93528	6.42202e-10	3.53441	1.03307e-09	0.201191	0.88198
2657	chr1	155085950	155086199	FALSE	Stable	2.28931	0.000218965	3.35402	6.30796e-09	-0.0896666	0.950658
2658	chr1	155086450	155086549	FALSE	Stable	2.20847	0.000357486	1.45688	0.0104491	-0.862379	0.378728
2659	chr1	155086700	155087299	FALSE	Stable	2.80058	7.15723e-06	3.46601	2.07034e-09	0.0358163	0.982164
2660	chr1	155091900	155092099	FALSE	Stable	3.01392	1.48182e-06	2.37409	3.16864e-05	0.195054	0.886357
2662	chr1	155098400	155099449	FALSE	Stable	3.28656	1.76331e-07	3.23966	1.90441e-08	0.644806	0.577022
2663	chr1	155158650	155159249	FALSE	Stable	3.45564	4.41667e-08	3.23663	1.96256e-08	0.279937	0.829274
2664	chr1	155159500	155159599	FALSE	Stable	3.35899	9.81085e-08	1.60158	0.0048642	0.155892	0.910478
2667	chr1	155229650	155229849	FALSE	Stable	2.72281	1.2445e-05	1.90191	0.00083107	0.466596	0.713604
2668	chr1	155232800	155232999	FALSE	Stable	3.43902	5.05923e-08	1.58649	0.00527983	0.251004	0.84831
2669	chr1	155234500	155235199	FALSE	Stable	3.4068	6.60275e-08	2.19746	0.000115369	0.912279	0.335691
2670	chr1	155235350	155235699	FALSE	Stable	3.93082	6.68944e-10	1.70123	0.00278196	1.20264	0.137556
2671	chr1	155244000	155244999	FALSE	Stable	3.51013	2.78137e-08	2.78113	1.2054e-06	0.478004	0.706362
2672	chr1	155307600	155307849	FALSE	Stable	2.09626	0.000692959	1.66164	0.0034854	0.820574	0.417916
2674	chr1	155416850	155417349	FALSE	Stable	2.81507	6.45029e-06	3.30957	9.69826e-09	0.206758	0.878708
2677	chr1	155530550	155530899	FALSE	Stable	3.67932	6.49078e-09	1.84482	0.00118751	1.06656	0.217037
2678	chr1	155533050	155533549	FALSE	Stable	2.8491	5.04356e-06	1.5354	0.00695205	0.275849	0.83224
2679	chr1	155557600	155558999	FALSE	Stable	4.0976	1.37396e-10	3.11253	6.29057e-08	0.360689	0.780719
2680	chr1	155604250	155604399	FALSE	Stable	2.25519	0.000269566	2.07572	0.000267608	0.148324	0.914586
2681	chr1	155604450	155604649	FALSE	Stable	1.46771	0.0170921	2.74744	1.60323e-06	-0.31021	0.811275
2682	chr1	155605000	155605649	FALSE	Stable	2.23228	0.000309683	3.35996	5.94695e-09	0.0827142	0.955034
2683	chr1	155635100	155635199	FALSE	Stable	2.2773	0.000235444	1.23386	0.030231	0.433587	0.734413
2684	chr1	155681900	155682049	FALSE	Stable	3.11604	6.78918e-07	1.97299	0.000528306	0.130611	0.925482
2685	chr1	155813050	155813149	FALSE	Stable	2.76229	9.40801e-06	3.43858	2.72201e-09	0.897539	0.348136
2686	chr1	155813250	155813349	FALSE	Stable	1.5501	0.0118014	1.66164	0.0034854	0.274415	0.832771
2687	chr1	155954400	155954649	FALSE	Stable	3.14066	5.59915e-07	3.43993	2.70068e-09	0.675767	0.550679
2688	chr1	155972600	155973199	FALSE	Stable	3.68716	6.06327e-09	3.50497	1.39782e-09	0.144462	0.917148
2689	chr1	155973400	155973799	FALSE	Stable	1.84918	0.00271026	2.99459	1.85353e-07	-0.0660333	0.964315
2690	chr1	156035050	156036799	FALSE	Stable	4.14962	8.35199e-11	4.34639	1.26963e-13	0.467583	0.713473
[truncated: 42,968 more rows]

## Sheet: HH sensitive H3K27ac
Peak_ID	Chromosome	Start	End	Gli3_binding	Type	WTinput_FC	WTinput_adjPval	SHHnullinput_FC	SHHnullinput_adjPval	WTSHHnull_FC	WTSHHnull_adjPval
190	chr1	22248700	22248949	FALSE	HH_sens	2.48532	6.26405e-05	2.92051	3.59172e-07	1.55228	0.0311057
207	chr1	24226600	24226849	FALSE	HH_sens	2.65834	1.95142e-05	2.11593	0.000203472	1.51744	0.0365798
416	chr1	38756300	38758049	TRUE	HH_sens	4.11102	1.2122e-10	1.81004	0.00146669	2.13515	0.000806129
417	chr1	38758100	38759749	TRUE	HH_sens	4.32778	1.45826e-11	2.49802	1.22221e-05	1.88272	0.00456733
653	chr1	47432150	47432749	FALSE	HH_sens	3.89207	9.56534e-10	2.01925	0.000390114	1.51852	0.0363601
693	chr1	51759050	51759249	TRUE	HH_sens	2.8523	4.93203e-06	2.30576	5.26586e-05	1.52158	0.0358392
793	chr1	55194400	55194599	FALSE	HH_sens	3.0589	1.05537e-06	1.43151	0.0118686	1.5997	0.0243403
853	chr1	58825900	58826349	TRUE	HH_sens	3.02507	1.3647e-06	2.15914	0.000150721	2.0938	0.00110776
877	chr1	59376750	59376849	FALSE	HH_sens	2.20769	0.000358781	1.732	0.0023293	1.46734	0.0463664
940	chr1	61233000	61233499	FALSE	HH_sens	3.30456	1.52139e-07	1.28025	0.0245019	1.57169	0.0283263
941	chr1	61233650	61235049	TRUE	HH_sens	3.5512	1.97194e-08	2.0477	0.000323569	1.52518	0.0354329
948	chr1	61301050	61301849	TRUE	HH_sens	3.07436	9.36375e-07	1.25233	0.0278549	1.50308	0.0392251
999	chr1	62244250	62245349	FALSE	HH_sens	3.65515	8.0517e-09	2.36948	3.28075e-05	1.45364	0.0495014
1185	chr1	71865200	71865549	FALSE	HH_sens	2.31211	0.000189377	1.81992	0.00138225	1.46171	0.047612
1238	chr1	73046400	73046499	FALSE	HH_sens	1.55858	0.0113534	1.39349	0.0143374	1.46122	0.047703
1435	chr1	76323750	76323899	FALSE	HH_sens	2.91231	3.17379e-06	1.32142	0.0202608	1.57012	0.0284669
1592	chr1	82258000	82258999	FALSE	HH_sens	3.52489	2.45591e-08	2.56073	7.44024e-06	1.75652	0.0101668
1593	chr1	82259300	82259799	FALSE	HH_sens	3.33561	1.18106e-07	1.36232	0.0166694	2.13006	0.000838684
1596	chr1	82261500	82261849	TRUE	HH_sens	2.73583	1.13611e-05	2.08096	0.000258441	1.62438	0.0214149
1606	chr1	82305950	82306099	FALSE	HH_sens	3.88611	1.01013e-09	1.40724	0.0133988	2.47888	4.98121e-05
1926	chr1	98048200	98048549	FALSE	HH_sens	3.42266	5.80984e-08	1.52402	0.00737993	1.45387	0.0494625
2150	chr1	132190600	132191299	TRUE	HH_sens	3.57673	1.58173e-08	1.45843	0.0103679	2.08026	0.00121991
2161	chr1	132430450	132430599	FALSE	HH_sens	3.44728	4.73213e-08	1.27893	0.0246483	1.5585	0.0301677
2196	chr1	133742250	133742849	TRUE	HH_sens	3.62793	1.0188e-08	1.26778	0.0259481	2.00129	0.00205489
2197	chr1	133742950	133743199	FALSE	HH_sens	3.03863	1.23025e-06	1.86801	0.00102738	2.14566	0.000748873
2297	chr1	136587600	136587949	TRUE	HH_sens	2.8976	3.53675e-06	1.15103	0.0432708	1.71336	0.0128872
2299	chr1	136589200	136589849	TRUE	HH_sens	2.92192	2.95811e-06	2.08484	0.000251799	2.28713	0.000243216
2612	chr1	152718500	152718599	FALSE	HH_sens	1.35615	0.0274847	1.87875	0.000961069	1.46488	0.0468685
2762	chr1	158859800	158860049	TRUE	HH_sens	2.49755	5.76654e-05	1.55955	0.00611508	1.90312	0.0039901
2763	chr1	158860600	158860999	TRUE	HH_sens	2.68754	1.59024e-05	1.92488	0.000720216	1.99053	0.00223253
3134	chr1	165694400	165694749	FALSE	HH_sens	3.16695	4.55719e-07	1.22348	0.0316553	2.32942	0.000175094
3376	chr1	172618550	172618699	TRUE	HH_sens	2.52471	4.81471e-05	1.75071	0.00208794	1.76566	0.0096816
3472	chr1	178733650	178733849	FALSE	HH_sens	3.22708	2.82867e-07	1.68693	0.0030212	1.50694	0.0385062
3836	chr1	187779250	187779349	FALSE	HH_sens	1.90091	0.00205881	1.55764	0.00617764	1.91711	0.00363564
3880	chr1	189921950	189922399	FALSE	HH_sens	2.81251	6.56973e-06	2.38422	2.93729e-05	1.53076	0.0342923
3881	chr1	189927450	189927599	FALSE	HH_sens	2.8649	4.51317e-06	2.22228	9.67879e-05	1.63428	0.0202781
3963	chr1	192901250	192901999	FALSE	HH_sens	4.25532	3.01213e-11	1.47754	0.00940591	1.89438	0.00424402
3964	chr1	192902100	192902249	FALSE	HH_sens	2.47817	6.55508e-05	1.34177	0.0184044	1.69781	0.0141552
4553	chr10	29673100	29673449	FALSE	HH_sens	2.69384	1.52366e-05	1.21445	0.0329457	1.76934	0.00945337
4639	chr10	35655100	35655299	FALSE	HH_sens	3.04848	1.14662e-06	1.41449	0.0129251	1.60631	0.0236488
4938	chr10	43358300	43358999	FALSE	HH_sens	3.41689	6.09649e-08	1.89706	0.00085739	1.48248	0.0433473
4981	chr10	44408850	44409049	TRUE	HH_sens	2.44781	7.97659e-05	1.82294	0.00135663	2.18347	0.000564447
4982	chr10	44409600	44409899	TRUE	HH_sens	2.65803	1.956e-05	1.33251	0.0192194	2.13881	0.000784039
4983	chr10	44410100	44410349	FALSE	HH_sens	2.06274	0.000841802	1.35148	0.0175728	1.48568	0.042763
4984	chr10	44499350	44499499	FALSE	HH_sens	3.23376	2.68238e-07	1.51907	0.00757256	2.27608	0.000269193
4994	chr10	44751900	44752049	FALSE	HH_sens	1.92715	0.00179104	1.626	0.00425234	1.59728	0.0246837
5000	chr10	44987100	44987199	FALSE	HH_sens	2.99776	1.67408e-06	2.46569	1.57239e-05	1.52374	0.035572
5014	chr10	45173700	45173949	FALSE	HH_sens	1.8806	0.00229829	3.58387	6.22903e-10	1.4518	0.0498727
5020	chr10	45230350	45231299	FALSE	HH_sens	3.41473	6.20819e-08	1.21534	0.0328246	1.81326	0.0072241
5027	chr10	45485900	45486399	FALSE	HH_sens	3.1552	5.00252e-07	2.80769	9.58394e-07	1.53372	0.0338257
5241	chr10	60202350	60202499	FALSE	HH_sens	2.66398	1.87884e-05	2.20243	0.000111367	1.4532	0.0495927
5491	chr10	69313500	69314699	FALSE	HH_sens	3.61143	1.17665e-08	1.91878	0.000747398	1.53898	0.0331452
5945	chr10	86481900	86482099	FALSE	HH_sens	2.82779	5.87598e-06	1.15499	0.0425748	1.64165	0.0194673
[truncated: 570 more rows]

## Sheet: HH dependent H3K27ac
Peak_ID	Chromosome	Start	End	Gli3_binding	Type	WTinput_FC	WTinput_adjPval	SHHnullinput_FC	SHHnullinput_adjPval	WTSHHnull_FC	WTSHHnull_adjPval
[truncated: 1,490 more rows]

[truncated: 4 more sheets: Other H3K27ac, Stable limb GBRs, HH sensitive limb GBRs, HH dependent limb GBRs]
