# Supplementary material for: GLI transcriptional repression regulates tissue-specific enhancer activity in response to Hedgehog signaling
Source: eLife. 2020 Jan 28;9:e50670. doi: 10.7554/eLife.50670 (PMC6986877; doi:10.7554/eLife.50670)
Supplement: Figure 1—source data 3. — H3K4me1 called peaks with a false discovery rate (FDR) < 0.05 from two biological replicates of E10.5 WT forelimbs. Note that this is a reanalysis of a publicly available ENCODE dataset (see methods). [file elife-50670-fig1-data3.xlsx]

## Sheet: peak
1	chr10	127661550	127663399	+	1850	0	127662707	127662832	127662787	127662769	126	6.11606	127661975	4.8704	127661975	100	127662725
2	chr16	20701800	20702699	+	900	0	20701962	20702382	20702297	20702172	421	5.87288	20702325	4.73411	20702325	100	20702225
3	chr5	140044500	140045249	+	750	0	140044727	140044802	140044817	140044764	76	5.73514	140044925	4.55384	140044925	85.0791	140044825
4	chr7	96570900	96571349	+	450	0	96571127	96571317	96571207	96571222	191	5.72767	96571175	4.62021	96571175	79.9913	96571225
5	chr5	125055450	125058899	+	3450	0	125056837	125056567	125056912	125056702	-269	5.7024	125056575	4.54989	125056575	100	125056575
6	chr7	99355950	99357499	+	1550	0	99356667	99356992	99356852	99356829	326	5.69448	99356725	4.54514	99356725	100	99356575
7	chr12	108913500	108914949	+	1450	0	108914612	108914667	108914582	108914639	56	5.68644	108914675	4.56041	108914675	100	108914525
8	chr8	120537400	120540499	+	3100	0	120539862	120539877	120539797	120539869	16	5.61937	120539475	4.4698	120539475	100	120538725
9	chr19	47327600	47328849	+	1250	0	47328272	47328432	47328362	47328352	161	5.60137	47328425	4.48997	47328425	100	47328275
10	chr8	108728600	108730249	+	1650	0	108729682	108729942	108729737	108729812	261	5.58813	108729725	4.45251	108729725	100	108729075
11	chr8	120176800	120177699	+	900	0	120177057	120177332	120177177	120177194	276	5.57794	120177125	4.50625	120177125	100	120177075
12	chr2	31087650	31088749	+	1100	0	31087772	31087842	31087847	31087807	71	5.55373	31087925	4.62885	31087975	100	31087825
13	chr5	119378200	119378799	+	600	0	119378342	119378682	119378587	119378512	341	5.53668	119378525	4.40602	119378525	100	119378525
14	chr9	44487300	44491649	+	4350	0	44490057	44489982	44489307	44490019	-74	5.48842	44489375	4.54356	44489375	100	44487525
15	chr7	142471000	142472649	+	1650	0	142471877	142472032	142471952	142471954	156	5.48236	142472225	4.44412	142472225	100	142471625
16	chr10	60811200	60817349	+	6150	0	60814167	60811757	60814267	60812962	-2409	5.48046	60815025	4.37571	60815025	100	60811525
17	chr3	101395600	101398349	+	2750	0	101396672	101396752	101396682	101396712	81	5.47907	101397975	4.37739	101397975	100	101396125
18	chr9	65153000	65155299	+	2300	0	65154617	65154912	65154747	65154764	296	5.42787	65155025	4.39345	65155025	100	65154775
19	chr4	131919300	131919999	+	700	0	131919547	131919692	131919617	131919619	146	5.42247	131919525	4.41218	131919525	100	131919575
20	chr5	136862750	136863699	+	950	0	136862977	136863077	136862997	136863027	101	5.40888	136862975	4.43778	136862975	100	136862925
21	chr4	41661150	41664399	+	3250	0	41663202	41663717	41663662	41663459	516	5.40659	41663475	4.31507	41663475	100	41661775
22	chr2	27411200	27411949	+	750	0	27411517	27411617	27411562	27411567	101	5.40246	27411575	4.57684	27411625	100	27411575
23	chr8	120507650	120512849	+	5200	0	120510717	120510732	120510757	120510724	16	5.40216	120509875	4.2978	120509875	100	120508825
24	chr8	94914550	94916249	+	1700	0	94915302	94915662	94915572	94915482	361	5.39886	94915475	4.35503	94915475	100	94915525
25	chr14	25497400	25499999	+	2600	0	25499132	25498747	25499212	25498939	-384	5.3955	25498575	4.35201	25498575	100	25498625
26	chr11	119083000	119084699	+	1700	0	119084387	119084102	119084027	119084244	-284	5.3941	119083725	4.30504	119083725	99.6656	119083625
27	chr11	98931850	98933499	+	1650	0	98931902	98933282	98931972	98932592	1381	5.38757	98932875	4.30067	98932875	100	98931975
28	chr17	25414550	25417349	+	2800	0	25416287	25416642	25416452	25416464	356	5.37838	25415925	4.25982	25415925	100	25414975
29	chr5	123134600	123136599	+	2000	0	123135622	123136437	123136352	123136029	816	5.3731	123135075	4.25502	123135075	89.3795	123136275
30	chr9	121313200	121314099	+	900	0	121313517	121313607	121313632	121313562	91	5.3681	121313575	4.32574	121313575	100	121313525
31	chr7	19215400	19215899	+	500	0	19215507	19215722	19215642	19215614	216	5.36346	19215625	4.2789	19215625	88.8094	19215625
32	chr9	64078300	64078899	+	600	0	64078527	64078682	64078602	64078604	156	5.36234	64078675	4.25378	64078675	100	64078575
33	chr12	117159900	117160549	+	650	0	117160107	117160352	117160282	117160229	246	5.35915	117160275	4.25149	117160275	70.3803	117160275
34	chr8	119830000	119830549	+	550	0	119830227	119830342	119830267	119830284	116	5.35475	119830225	4.41306	119830225	97.6275	119830275
35	chr19	47290500	47293149	+	2650	0	47291787	47292867	47291837	47292327	1081	5.35463	47291825	4.3867	47291825	100	47291725
36	chr5	139389100	139390349	+	1250	0	139389182	139389797	139389722	139389489	616	5.35035	139390125	4.41576	139390075	91.1316	139389725
37	chr11	115830200	115834949	+	4750	0	115831552	115831937	115831632	115831744	386	5.32245	115832925	4.32187	115832925	100	115831225
38	chr10	40151050	40152099	+	1050	0	40151062	40151607	40151642	40151334	546	5.31947	40151375	4.2473	40151375	84.4022	40151625
39	chr8	120517000	120519349	+	2350	0	120518417	120518577	120518492	120518497	161	5.29277	120517725	4.22427	120517725	100	120517575
40	chr18	54976150	54977149	+	1000	0	54976907	54976967	54976947	54976937	61	5.28758	54976925	4.26358	54976925	84.9554	54976975
41	chr10	80674000	80675399	+	1400	0	80674787	80674762	80674867	80674774	-24	5.28239	80674875	4.22449	80674925	90.1137	80674925
42	chr4	43044750	43045599	+	850	0	43045292	43045122	43045372	43045207	-169	5.27412	43045025	4.20488	43045025	31.6982	43045375
43	chr11	57683300	57684249	+	950	0	57684222	57684017	57683942	57684119	-204	5.26992	57683875	4.20498	57683875	76.6901	57683925
44	chr7	143380550	143381149	+	600	0	143381067	143381147	143381077	143381107	81	5.26871	143380975	4.20717	143380925	65.0093	143380975
45	chr15	27785450	27786049	+	600	0	27785802	27785557	27785487	27785679	-244	5.26098	27785675	4.23003	27785675	58.7104	27785875
46	chr4	139595550	139599649	+	4100	0	139597817	139598237	139598147	139598027	421	5.2569	139598025	4.18244	139598025	100	139596175
47	chr4	136828950	136831049	+	2100	0	136830077	136830337	136829877	136830207	261	5.25475	136829925	4.21938	136829325	100	136829775
48	chr15	83678850	83681999	+	3150	0	83679752	83679162	83679822	83679457	-589	5.25101	83679075	4.16494	83679075	100	83679025
49	chr4	47050500	47051399	+	900	0	47051187	47050662	47051262	47050924	-524	5.24199	47051175	4.15291	47051175	64.5224	47051275
50	chr5	24329050	24329849	+	800	0	24329242	24329282	24329332	24329262	41	5.23963	24329325	4.17857	24329325	100	24329175
51	chr18	35833900	35842049	+	8150	0	35838512	35837607	35837407	35838059	-904	5.23881	35835125	4.21914	35835225	100	35834425
52	chr2	179435350	179435949	+	600	0	179435577	179435837	179435682	179435707	261	5.23209	179435675	4.1439	179435675	100	179435675
53	chr12	107960350	107961699	+	1350	0	107961202	107961272	107961267	107961237	71	5.23151	107961275	4.17401	107961275	100	107961225
54	chr2	33811300	33815199	+	3900	0	33814022	33812222	33814097	33813122	-1799	5.22541	33814125	4.15909	33814125	100	33812075
55	chr15	83665300	83667649	+	2350	0	83665782	83665927	83665857	83665854	146	5.21902	83665925	4.25998	83665925	100	83665775
56	chr15	102749700	102750449	+	750	0	102749897	102750132	102750012	102750014	236	5.21643	102750125	4.12784	102750125	51.9425	102750025
57	chr14	54572650	54573849	+	1200	0	54573612	54573262	54573297	54573437	-349	5.21317	54573175	4.16925	54573175	100	54573125
58	chr2	59720900	59721899	+	1000	0	59721507	59721322	59721252	59721414	-184	5.21016	59721675	4.12895	59721675	100	59721225
59	chr11	117349700	117351099	+	1400	0	117350112	117350442	117350277	117350277	331	5.20116	117350575	4.4299	117350525	100	117350225
60	chr11	62629200	62631749	+	2550	0	62630557	62630762	62630677	62630659	206	5.19742	62630775	4.1159	62630775	100	62629675
61	chr8	121375850	121378549	+	2700	0	121377567	121376522	121377542	121377044	-1044	5.19492	121377575	4.13821	121377575	100	121377175
62	chr11	98961300	98966999	+	5700	0	98965417	98965132	98965432	98965274	-284	5.19438	98965475	4.23314	98965425	100	98962525
63	chr11	5415750	5417299	+	1550	0	5416607	5416522	5416377	5416564	-84	5.19204	5416625	4.12087	5416625	100	5416325
64	chr4	117648950	117650149	+	1200	0	117649412	117649552	117649482	117649482	141	5.1865	117649525	4.15776	117649525	100	117649425
65	chr5	125156550	125160649	+	4100	0	125158807	125157917	125158872	125158362	-889	5.18494	125157075	4.38479	125157125	100	125156775
66	chr19	43920450	43921199	+	750	0	43920727	43920922	43920827	43920824	196	5.18074	43920825	4.25816	43920825	75.3192	43920825
67	chr11	117277600	117282349	+	4750	0	117278067	117278277	117278152	117278172	211	5.17856	117280575	4.10362	117280575	100	117278025
68	chr11	119157300	119158349	+	1050	0	119157532	119157942	119157612	119157737	411	5.17837	119157625	4.12162	119157625	100	119157625
69	chr13	28418850	28419299	+	450	0	28419042	28419127	28419092	28419084	86	5.17424	28419025	4.1365	28419025	50.9834	28419125
70	chr8	87937550	87940499	+	2950	0	87938432	87938707	87938507	87938569	276	5.17236	87939275	4.12168	87939275	100	87938475
71	chr4	106102650	106103549	+	900	0	106102922	106102932	106102887	106102927	11	5.17171	106103325	4.15599	106103325	100	106102875
72	chr4	117409250	117410599	+	1350	0	117409607	117409687	117409657	117409647	81	5.17134	117409875	4.10562	117409875	100	117409675
73	chr12	4187950	4188349	+	400	0	4188312	4188192	4188052	4188252	-119	5.17122	4188175	4.11167	4188175	42.4771	4188075
74	chr17	27505200	27506299	+	1100	0	27505677	27505847	27505772	27505762	171	5.16852	27505775	4.17852	27505775	100	27505775
75	chr4	133020500	133023249	+	2750	0	133021167	133021317	133021242	133021242	151	5.16728	133020675	4.08637	133020675	100	133020975
76	chr6	30615550	30617099	+	1550	0	30616082	30616102	30616037	30616092	21	5.16542	30616175	4.11131	30616175	96.8939	30616075
77	chr19	4301550	4303549	+	2000	0	4302872	4302777	4302872	4302824	-94	5.16412	4302775	4.41161	4302775	100	4302625
78	chr8	87830250	87834599	+	4350	0	87833427	87832772	87833502	87833099	-654	5.1632	87830525	4.09823	87830525	100	87830425
79	chr11	117316350	117321049	+	4700	0	117316567	117320147	117317512	117318357	3581	5.16291	117318675	4.38387	117318675	100	117316525
80	chr12	79750300	79752699	+	2400	0	79752192	79752007	79752312	79752099	-184	5.15121	79752175	4.27606	79752175	100	79752275
81	chr11	75138950	75140549	+	1600	0	75139117	75140257	75140157	75139687	1141	5.14846	75139425	4.08638	75139425	94.6208	75139275
82	chr10	83069450	83070199	+	750	0	83069787	83069967	83069862	83069877	181	5.14653	83069825	4.0718	83069825	95.5064	83069875
83	chr8	23255450	23255849	+	400	0	23255532	23255592	23255752	23255562	61	5.14652	23255625	4.06984	23255625	41.8419	23255525
84	chr9	61069550	61071299	+	1750	0	61069997	61070167	61070077	61070082	171	5.13934	61070025	4.0677	61070025	100	61070075
85	chr12	109450350	109451149	+	800	0	109450482	109450857	109450487	109450669	376	5.13761	109450775	4.06961	109450775	75.769	109450725
86	chr4	117376150	117376649	+	500	0	117376357	117376647	117376617	117376502	291	5.13736	117376325	4.28068	117376325	52.4221	117376475
87	chr6	124839650	124840399	+	750	0	124839957	124840112	124840047	124840034	156	5.13657	124839825	4.25256	124839825	73.1099	124839975
88	chr5	113806800	113808349	+	1550	0	113807992	113807517	113808067	113807754	-474	5.13638	113807875	4.17682	113807875	100	113807325
89	chr12	117807800	117808199	+	400	0	117807847	117808167	117808042	117808007	321	5.13627	117808025	4.19762	117808025	36.6998	117808025
90	chr4	141337750	141339399	+	1650	0	141338532	141338192	141338117	141338362	-339	5.13596	141338175	4.09424	141338225	100	141338125
91	chr12	110187250	110189099	+	1850	0	110188707	110188072	110188007	110188389	-634	5.1349	110187775	4.08493	110187775	74.3546	110188825
92	chr10	110806050	110806549	+	500	0	110806177	110806347	110806272	110806262	171	5.13329	110806225	4.08679	110806225	45.5067	110806275
93	chr15	102511200	102512799	+	1600	0	102511762	102512147	102512167	102511954	386	5.12932	102512125	4.08374	102512125	100	102512125
94	chr11	4603100	4603499	+	400	0	4603162	4603382	4603307	4603272	221	5.12836	4603375	4.10861	4603375	79.7293	4603275
95	chr11	88172600	88174249	+	1650	0	88173352	88173032	88173522	88173192	-319	5.12737	88173625	4.0865	88173625	100	88173275
96	chr9	72640750	72641349	+	600	0	72641007	72641307	72641202	72641157	301	5.12692	72641175	4.13114	72641175	99.192	72641125
97	chr5	136619500	136620249	+	750	0	136619892	136620147	136620072	136620019	256	5.12517	136620025	4.08219	136620025	84.531	136620025
98	chr10	61068750	61069449	+	700	0	61068972	61069197	61069187	61069084	226	5.12499	61069125	4.05939	61069125	100	61069175
99	chr8	120294550	120296249	+	1700	0	120295512	120295442	120295487	120295477	-69	5.12471	120296025	4.07461	120296025	100	120295175
100	chr2	167582950	167584099	+	1150	0	167583472	167583527	167583547	167583499	56	5.12137	167583525	4.21752	167583525	100	167583425
101	chr12	112403700	112404399	+	700	0	112403902	112404097	112403972	112403999	196	5.12133	112404075	4.06149	112404075	71.8966	112404025
102	chr16	44629400	44629999	+	600	0	44629787	44629812	44629862	44629799	26	5.12066	44629675	4.1014	44629675	79.0894	44629625
103	chr9	107697700	107701949	+	4250	0	107700212	107699242	107698102	107699727	-969	5.12037	107699075	4.05731	107699075	100	107697825
104	chr9	48649050	48649549	+	500	0	48649192	48649447	48649317	48649319	256	5.11888	48649325	4.13493	48649325	100	48649325
105	chr17	29185400	29185949	+	550	0	29185577	29185712	29185652	29185644	136	5.11779	29185625	4.04671	29185625	100	29185575
106	chr6	100526050	100526699	+	650	0	100526157	100526212	100526057	100526184	56	5.11756	100526275	4.05573	100526275	88.026	100526175
107	chr16	95824550	95825449	+	900	0	95825187	95825442	95825257	95825314	256	5.11427	95825125	4.04472	95825125	85.3842	95825275
108	chr11	54057950	54059549	+	1600	0	54059107	54058427	54058412	54058767	-679	5.1104	54059125	4.15102	54059125	100	54058325
109	chr11	98952750	98956049	+	3300	0	98954532	98955222	98954882	98954877	691	5.09889	98953425	4.05252	98953425	100	98953425
110	chr19	7421200	7423699	+	2500	0	7423367	7422087	7422292	7422727	-1279	5.09564	7423475	4.02984	7423475	100	7423425
111	chr5	113798000	113799149	+	1150	0	113798207	113798452	113798337	113798329	246	5.09415	113798425	4.23966	113798425	70.0245	113798275
112	chr18	75296800	75297549	+	750	0	75297082	75297257	75297157	75297169	176	5.09405	75297025	4.04987	75297025	100	75296925
113	chr7	137298550	137299599	+	1050	0	137299472	137299112	137299547	137299292	-359	5.09201	137298775	4.118	137298825	63.0113	137299525
114	chr18	69664150	69665499	+	1350	0	69665257	69665417	69665332	69665337	161	5.09122	69664425	4.03751	69664425	80.9595	69664475
115	chr2	172934500	172935899	+	1400	0	172935302	172935427	172935357	172935364	126	5.09115	172935375	4.04429	172935375	100	172935275
116	chr7	142563900	142565749	+	1850	0	142564917	142564992	142564947	142564954	76	5.08869	142565075	4.15463	142565125	100	142564875
117	chr6	100335500	100335949	+	450	0	100335762	100335862	100335837	100335812	101	5.08817	100335775	4.03602	100335775	74.9068	100335825
118	chr2	156440150	156440699	+	550	0	156440347	156440537	156440462	156440442	191	5.08768	156440525	4.06943	156440525	83.6801	156440325
119	chr4	148871900	148873849	+	1950	0	148872002	148872212	148872132	148872107	211	5.08682	148872625	4.02998	148872625	100	148872075
120	chr11	35387150	35388599	+	1450	0	35387387	35388377	35388232	35387882	991	5.07689	35388225	4.01069	35388225	100	35388175
121	chr13	59940900	59941249	+	350	0	59941012	59941092	59941017	59941052	81	5.07644	59941075	4.05354	59941075	50.3546	59941075
122	chr1	74089100	74090649	+	1550	0	74089622	74089747	74089677	74089684	126	5.07619	74089725	4.15779	74089725	100	74089675
123	chr14	25554450	25556999	+	2550	0	25556722	25556777	25556562	25556749	56	5.07594	25556575	4.03122	25556575	100	25555325
124	chr9	44484850	44487249	+	2400	0	44485707	44485927	44485782	44485817	221	5.07406	44485875	4.05031	44485875	100	44485675
125	chr2	167563900	167565499	+	1600	0	167564502	167565122	167564962	167564812	621	5.07315	167565075	4.06592	167565025	100	167564475
126	chr1	74042000	74043999	+	2000	0	74042597	74042962	74043657	74042779	366	5.07173	74042975	4.07095	74042975	100	74042725
127	chr4	133013200	133015649	+	2450	0	133014287	133014472	133014362	133014379	186	5.06928	133014875	4.01075	133014875	100	133014375
128	chr4	150361700	150362499	+	800	0	150362132	150362197	150362117	150362164	66	5.06405	150362325	4.07674	150362325	76.1911	150362175
129	chr2	165884800	165885699	+	900	0	165885007	165885117	165885157	165885062	111	5.06299	165885175	4.06904	165885175	100	165884925
130	chr11	118323900	118324549	+	650	0	118324332	118324382	118324307	118324357	51	5.06147	118324325	4.01815	118324325	68.1967	118324325
131	chr5	115438300	115439499	+	1200	0	115438857	115439092	115438932	115438974	236	5.06051	115438925	4.12986	115438925	100	115438825
132	chr11	88506250	88507299	+	1050	0	88506752	88506877	88506802	88506814	126	5.05915	88506825	4.04609	88506825	100	88506725
133	chr7	142546000	142548599	+	2600	0	142546837	142547147	142546877	142546992	311	5.0588	142546625	3.9958	142546625	100	142546625
134	chr8	107820400	107821049	+	650	0	107821007	107820502	107820427	107820754	-504	5.05836	107820825	4.02563	107820825	50.1624	107820425
135	chr8	94916500	94916999	+	500	0	94916717	94916787	94916712	94916752	71	5.05225	94916775	4.25666	94916725	95.0794	94916775
136	chr11	3293350	3294049	+	700	0	3293597	3293712	3293637	3293654	116	5.04963	3293775	4.07998	3293775	71.57	3293725
137	chr11	98938600	98944249	+	5650	0	98939962	98943472	98940952	98941717	3511	5.04959	98941425	4.02297	98941425	100	98939375
138	chr7	96553150	96555099	+	1950	0	96554082	96553597	96554392	96553839	-484	5.04947	96554025	4.01954	96554025	82.5453	96554375
139	chr11	88581900	88582599	+	700	0	88582222	88582422	88582337	88582322	201	5.0491	88582325	4.03422	88582325	100	88582375
140	chr1	75447550	75449649	+	2100	0	75447732	75447887	75447812	75447809	156	5.04738	75448025	3.98636	75448025	100	75447675
141	chr4	106815050	106816349	+	1300	0	106815602	106815937	106815677	106815769	336	5.04519	106815775	3.98996	106815775	72.5952	106815725
142	chr8	120438250	120440399	+	2150	0	120439272	120439582	120439512	120439427	311	5.04474	120439425	4.17963	120439425	100	120439325
143	chr5	143652200	143653449	+	1250	0	143652527	143652947	143652877	143652737	421	5.03673	143652875	3.98945	143652875	52.1791	143652875
144	chr8	120562400	120566349	+	3950	0	120562677	120562832	120562752	120562754	156	5.03607	120565825	4.07312	120565825	100	120562625
145	chr7	24906750	24907899	+	1150	0	24907097	24907162	24907127	24907129	66	5.03488	24907175	4.0201	24907175	82.1866	24907125
146	chr9	106353350	106356299	+	2950	0	106354837	106355567	106355492	106355202	731	5.03465	106355975	3.97905	106355975	100	106354725
147	chr12	8884850	8885849	+	1000	0	8885482	8885657	8885557	8885569	176	5.03363	8885625	4.16281	8885575	98.2346	8885525
148	chr2	115813400	115813849	+	450	0	115813537	115813702	115813627	115813619	166	5.02759	115813625	4.1165	115813675	62.7461	115813625
149	chr11	61003850	61004699	+	850	0	61004077	61004327	61004152	61004202	251	5.02449	61004175	4.09206	61004175	100	61004175
150	chr13	51313250	51314499	+	1250	0	51313682	51313777	51313732	51313729	96	5.02118	51313825	4.02474	51313825	100	51313625
151	chr7	70624100	70624549	+	450	0	70624122	70624232	70624197	70624177	111	5.0205	70624325	4.12483	70624275	72.2087	70624275
152	chr8	120492150	120495199	+	3050	0	120494907	120492932	120492857	120493919	-1974	5.01882	120492575	4.01027	120492575	100	120492575
153	chr11	120703350	120708149	+	4800	0	120705197	120707377	120705262	120706287	2181	5.01864	120707325	3.98863	120707325	100	120704125
154	chr2	31258550	31259849	+	1300	0	31259487	31258887	31258817	31259187	-599	5.01851	31259375	4.21557	31259375	77.6629	31258825
155	chr9	61359850	61361499	+	1650	0	61360812	61360942	61360882	61360877	131	5.0183	61361075	3.97842	61361075	100	61360675
156	chr2	58533200	58534849	+	1650	0	58533212	58534577	58533827	58533894	1366	5.01427	58534725	4.03626	58534725	59.1988	58533825
157	chr11	106316600	106317599	+	1000	0	106316832	106317012	106316907	106316922	181	5.01318	106317325	4.07861	106317325	100	106316925
158	chr4	133199600	133201099	+	1500	0	133200227	133200357	133200302	133200292	131	5.01315	133200375	3.99066	133200375	100	133200275
159	chr2	128714750	128716049	+	1300	0	128715867	128715582	128715917	128715724	-284	5.00942	128715525	3.99969	128715525	59.7886	128715925
160	chr19	44989800	44990449	+	650	0	44990357	44990347	44990227	44990352	-9	5.00713	44990025	3.96532	44990025	44.3665	44990325
161	chr15	53312050	53312899	+	850	0	53312492	53312662	53312587	53312577	171	5.006	53312675	3.98819	53312675	92.812	53312575
162	chr1	73970000	73970949	+	950	0	73970132	73970297	73970207	73970214	166	5.00506	73970225	3.96006	73970225	100	73970175
163	chr16	34958350	34959049	+	700	0	34958722	34958747	34958707	34958734	26	4.99986	34958725	4.00709	34958675	64.7169	34958725
164	chr9	96961350	96962849	+	1500	0	96962472	96962767	96962542	96962619	296	4.99768	96962625	3.95584	96962625	100	96962575
165	chr16	4602000	4607199	+	5200	0	4605557	4602427	4603187	4603992	-3129	4.9954	4602475	4.04774	4602475	100	4602325
166	chr12	108240750	108241899	+	1150	0	108240922	108241147	108240997	108241034	226	4.9949	108241175	4.00744	108241175	100	108240925
167	chr19	4215900	4217599	+	1700	0	4217167	4217192	4217242	4217179	26	4.99327	4217375	3.98434	4217375	100	4217175
168	chr7	70699150	70699799	+	650	0	70699677	70699772	70699717	70699724	96	4.99209	70699425	3.94596	70699425	64.3868	70699725
169	chr17	84188700	84189399	+	700	0	84188987	84189247	84189102	84189117	261	4.98961	84189075	4.04211	84189075	82.7653	84189075
170	chr9	58305350	58306749	+	1400	0	58305672	58306122	58306052	58305897	451	4.98747	58306075	3.9765	58306075	100	58306025
171	chr19	25374850	25375349	+	500	0	25375077	25375247	25375172	25375162	171	4.98688	25375125	3.99997	25375125	87.2357	25375175
172	chr7	127023000	127024099	+	1100	0	127023412	127023622	127023547	127023517	211	4.98677	127023575	4.12346	127023575	100	127023475
173	chr13	36582950	36584549	+	1600	0	36583527	36583262	36583152	36583394	-264	4.98567	36583625	3.96117	36583625	75.2407	36583075
174	chr9	69224350	69224699	+	350	0	69224472	69224602	69224532	69224537	131	4.98492	69224525	4.0187	69224525	68.4979	69224525
175	chr15	58982400	58984449	+	2050	0	58983397	58982832	58983472	58983114	-564	4.984	58983475	3.99835	58983475	98.8513	58983475
176	chr7	144769750	144770399	+	650	0	144770152	144770212	144770227	144770182	61	4.98384	144770125	3.93953	144770125	85.3564	144770225
177	chr9	44498800	44501949	+	3150	0	44500777	44500862	44500837	44500819	86	4.98356	44500725	3.95458	44500725	100	44499775
178	chr13	51259350	51259999	+	650	0	51259652	51259712	51259627	51259682	61	4.98221	51259775	4.0078	51259775	80.8955	51259775
179	chr9	107722200	107725049	+	2850	0	107723202	107723457	107723282	107723329	256	4.98176	107723375	3.94737	107723375	100	107723025
180	chr7	73140700	73141599	+	900	0	73140732	73141302	73141292	73141017	571	4.98116	73141275	3.9397	73141275	52.4701	73141325
181	chr9	47961650	47962349	+	700	0	47961887	47961972	47961932	47961929	86	4.98079	47961925	4.04103	47961925	80.7016	47961925
182	chr3	30106500	30106999	+	500	0	30106507	30106927	30106582	30106717	421	4.98031	30106825	4.01124	30106825	53.9291	30106625
183	chr2	30658800	30662049	+	3250	0	30659567	30660202	30659457	30659884	636	4.97904	30659425	3.99186	30659425	100	30659425
184	chr4	138252150	138252799	+	650	0	138252297	138252692	138252622	138252494	396	4.97882	138252575	3.98083	138252575	100	138252575
185	chr17	24209550	24211799	+	2250	0	24210827	24211452	24210977	24211139	626	4.97858	24211375	4.00466	24210225	90.0686	24211325
186	chr17	25404850	25407249	+	2400	0	25406287	25406802	25406282	25406544	516	4.97826	25406525	3.93812	25406525	98.894	25406375
187	chr10	79944700	79947349	+	2650	0	79945552	79946737	79946712	79946144	1186	4.97789	79946925	3.942	79946925	100	79945525
188	chr4	149921700	149923799	+	2100	0	149921737	149922287	149922212	149922012	551	4.97763	149921875	3.96513	149921875	96.7188	149921925
189	chr5	24321300	24322999	+	1700	0	24322097	24322077	24322172	24322087	-19	4.97483	24321825	3.93088	24321825	100	24322125
190	chr13	53142350	53143949	+	1600	0	53142882	53142932	53142877	53142907	51	4.97475	53142925	3.95766	53142925	88.9624	53142875
191	chr14	22168550	22169249	+	700	0	22168557	22169082	22168637	22168819	526	4.97351	22168875	3.93809	22168875	68.4991	22169025
192	chr18	35822600	35823849	+	1250	0	35823152	35823662	35823587	35823407	511	4.97311	35823525	3.92521	35823525	100	35823125
193	chr8	121148600	121148999	+	400	0	121148712	121148802	121148777	121148757	91	4.97295	121148775	3.95569	121148775	59.6245	121148775
194	chr8	61286200	61286649	+	450	0	61286282	61286397	61286357	61286339	116	4.97266	61286425	3.9924	61286425	69.4677	61286375
195	chr8	87804150	87805399	+	1250	0	87804407	87804642	87804482	87804524	236	4.97199	87804875	3.96518	87804875	100	87804475
196	chr6	83087050	83087449	+	400	0	83087057	83087302	83087197	83087179	246	4.97101	83087175	3.94238	83087175	44.9623	83087225
197	chr4	154472350	154474049	+	1700	0	154472717	154472927	154472852	154472822	211	4.97066	154472525	3.98596	154472525	100	154472525
198	chr2	152670900	152671899	+	1000	0	152671462	152671262	152671187	152671362	-199	4.96997	152671225	4.15598	152671175	81.4907	152671175
199	chr7	125828800	125829749	+	950	0	125829402	125829527	125829467	125829464	126	4.96997	125829325	3.9333	125829325	70.1068	125829475
200	chr8	70316800	70317599	+	800	0	70316932	70317072	70316997	70317002	141	4.96892	70316975	3.96328	70316975	100	70316875
201	chr1	168357750	168358649	+	900	0	168358417	168358537	168358462	168358477	121	4.96792	168358075	4.06759	168358075	79.3758	168358425
202	chr2	30442100	30446349	+	4250	0	30442652	30442802	30442727	30442727	151	4.96784	30442325	3.954	30442275	100	30442325
203	chr2	168911150	168911849	+	700	0	168911567	168911717	168911642	168911642	151	4.96719	168911625	3.97015	168911625	62.3545	168911675
204	chr8	122523100	122523949	+	850	0	122523532	122523332	122523672	122523432	-199	4.96207	122523525	4.14735	122523525	100	122523625
205	chr2	172887300	172889449	+	2150	0	172888377	172888567	172888467	172888472	191	4.96098	172888525	3.97242	172888525	100	172887925
206	chr13	28781550	28782649	+	1100	0	28782072	28782147	28782097	28782109	76	4.95983	28782175	3.97753	28782125	88.3828	28782125
207	chr4	118477050	118477599	+	550	0	118477127	118477307	118477232	118477217	181	4.95971	118477375	3.94787	118477375	74.5623	118477225
208	chr3	122516750	122517799	+	1050	0	122517627	122517702	122517627	122517664	76	4.95843	122517525	3.99057	122517525	100	122517525
209	chr11	95579400	95582449	+	3050	0	95580847	95581067	95580967	95580957	221	4.95838	95580675	3.91459	95580675	100	95579925
210	chr12	80227850	80230349	+	2500	0	80229322	80229807	80229407	80229564	486	4.9577	80229675	3.92957	80229575	100	80229375
211	chr4	130572600	130572999	+	400	0	130572602	130572842	130572762	130572722	241	4.95475	130572825	3.92887	130572825	96.5886	130572775
212	chr2	30546300	30547499	+	1200	0	30546312	30547082	30547007	30546697	771	4.95397	30547325	3.99842	30547325	67.1785	30547025
213	chr8	84984350	84985199	+	850	0	84984762	84985007	84984932	84984884	246	4.95379	84984875	4.00856	84984875	100	84984825
214	chr8	117333500	117335899	+	2400	0	117334532	117334647	117334607	117334589	116	4.95369	117334975	4.00406	117334975	100	117333975
215	chr7	25149700	25152899	+	3200	0	25152462	25152747	25152617	25152604	286	4.95328	25151225	4.00987	25151225	100	25151125
216	chr13	73832850	73833849	+	1000	0	73833347	73833507	73833427	73833427	161	4.94972	73833425	3.9712	73833425	100	73833275
217	chr4	148909600	148910199	+	600	0	148909767	148909917	148909842	148909842	151	4.94953	148909875	4.0049	148909875	100	148909775
218	chr8	120424000	120427549	+	3550	0	120425127	120425157	120425087	120425142	31	4.94885	120425475	3.92209	120425475	100	120424475
219	chr2	30600550	30601749	+	1200	0	30600757	30601537	30600797	30601147	781	4.94773	30601025	4.09386	30600975	91.0595	30600825
220	chr5	107014600	107015399	+	800	0	107014642	107014917	107014842	107014779	276	4.94454	107014875	3.9116	107014875	66.7089	107014825
221	chr4	128906300	128907299	+	1000	0	128906712	128907032	128906967	128906872	321	4.94394	128906475	3.91246	128906475	63.9428	128906825
222	chr11	98766850	98768749	+	1900	0	98767282	98767442	98767357	98767362	161	4.94386	98767275	3.91899	98767275	100	98767225
223	chr17	8370450	8370999	+	550	0	8370482	8370777	8370582	8370629	296	4.94113	8370575	3.9888	8370625	64.3589	8370575
224	chr14	121104450	121107299	+	2850	0	121106167	121106977	121106822	121106572	811	4.9405	121106825	3.9121	121106825	100	121106025
225	chr9	61383800	61384499	+	700	0	61383997	61384437	61384087	61384217	441	4.94038	61384225	4.06055	61384225	70.2702	61384125
226	chr8	25543750	25544849	+	1100	0	25544057	25544212	25544137	25544134	156	4.93996	25544175	4.13086	25544175	100	25544125
227	chr4	133048950	133052949	+	4000	0	133051797	133052552	133051962	133052174	756	4.93887	133051875	3.98069	133051775	100	133049325
228	chr15	53223850	53224849	+	1000	0	53224322	53224452	53224402	53224387	131	4.93743	53224475	3.93887	53224475	100	53224325
229	chr6	48540050	48541749	+	1700	0	48541142	48540677	48541497	48540909	-464	4.93607	48541325	3.98461	48541325	86.3115	48541475
230	chr2	166348250	166348949	+	700	0	166348652	166348802	166348727	166348727	151	4.93536	166348725	3.91313	166348725	88.041	166348725
231	chr18	55692150	55694349	+	2200	0	55693887	55693667	55693552	55693777	-219	4.93524	55693825	3.95118	55693825	98.5259	55693575
232	chr4	155133450	155135449	+	2000	0	155134372	155134067	155134397	155134219	-304	4.93377	155134425	4.02556	155134425	100	155134025
233	chr4	137487300	137488099	+	800	0	137487807	137487822	137487747	137487814	16	4.93346	137487775	3.89193	137487775	100	137487625
234	chr9	35316600	35318199	+	1600	0	35317372	35317982	35317902	35317677	611	4.93264	35317875	3.91918	35317875	100	35317175
235	chr17	85874300	85874549	+	250	0	85874337	85874432	85874417	85874384	96	4.92964	85874425	3.9029	85874425	48.4421	85874425
236	chr8	126538400	126539699	+	1300	0	126539007	126538822	126538747	126538914	-184	4.92918	126538925	3.97863	126538975	78.4224	126538775
237	chr4	106853500	106856299	+	2800	0	106855792	106856112	106856047	106855952	321	4.92861	106854975	3.93439	106856025	100	106854225
238	chr11	94992850	94994649	+	1800	0	94994077	94994257	94994152	94994167	181	4.9286	94993925	3.97583	94993975	90.4117	94994125
239	chr14	67300150	67300799	+	650	0	67300297	67300497	67300422	67300397	201	4.92856	67300375	3.89441	67300375	100	67300425
240	chr3	138856900	138857449	+	550	0	138857382	138857052	138857417	138857217	-329	4.92836	138857075	3.93668	138857075	64.5511	138856975
241	chr5	74253350	74254599	+	1250	0	74253967	74254282	74254042	74254124	316	4.92714	74253925	4.28507	74253875	100	74253975
242	chr5	140647000	140647849	+	850	0	140647662	140647462	140647387	140647562	-199	4.92678	140647325	3.9102	140647325	75.0815	140647425
243	chr1	181353500	181353799	+	300	0	181353597	181353767	181353672	181353682	171	4.92628	181353675	3.88672	181353675	41.1031	181353725
244	chr4	133055000	133056649	+	1650	0	133055562	133055647	133055592	133055604	86	4.92623	133055625	3.94262	133055625	100	133055525
245	chr4	136136250	136136849	+	600	0	136136397	136136577	136136487	136136487	181	4.92406	136136525	3.90194	136136525	100	136136425
246	chr17	32162500	32163099	+	600	0	32162697	32162797	32162737	32162747	101	4.92314	32162725	3.91304	32162725	76.7552	32162725
247	chr9	63697000	63698949	+	1950	0	63697087	63697332	63697237	63697209	246	4.92303	63697225	3.97167	63697225	100	63697175
248	chr13	94806850	94807099	+	250	0	94806857	94807032	94806952	94806944	176	4.92297	94806975	3.92666	94806975	42.4164	94806975
249	chr11	85709250	85709799	+	550	0	85709512	85709722	85709562	85709617	211	4.9228	85709625	3.93898	85709625	82.9055	85709625
250	chr17	28344000	28346649	+	2650	0	28345932	28346172	28346107	28346052	241	4.91835	28345525	4.01104	28345525	100	28344375
251	chr17	78521900	78522249	+	350	0	78521927	78522172	78522072	78522049	246	4.91825	78522075	3.88984	78522025	54.5611	78521975
252	chr6	128087900	128090649	+	2750	0	128088977	128088482	128088317	128088729	-494	4.91634	128089625	3.88327	128089625	100	128088025
253	chr15	101227800	101228849	+	1050	0	101228022	101228047	101227982	101228034	26	4.91563	101228425	3.907	101228425	77.8882	101228025
254	chr19	55940200	55940749	+	550	0	55940352	55940537	55940382	55940444	186	4.91527	55940375	3.90894	55940375	100	55940475
255	chr5	115433650	115436499	+	2850	0	115435162	115435337	115435257	115435249	176	4.91519	115435275	3.8801	115435275	100	115434725
256	chr4	124703250	124705199	+	1950	0	124704632	124704292	124704237	124704462	-339	4.91479	124705075	3.91102	124705075	100	124703675
257	chr17	83895250	83896349	+	1100	0	83895652	83895957	83895737	83895804	306	4.91421	83895675	3.89309	83895675	100	83895775
258	chr8	120217100	120218199	+	1100	0	120217402	120217647	120217572	120217524	246	4.91413	120217675	3.88549	120217675	100	120217575
259	chr12	110082800	110083549	+	750	0	110083177	110083372	110083292	110083274	196	4.91308	110083225	3.91815	110083225	73.2448	110083275
260	chr11	120183600	120186049	+	2450	0	120184612	120184742	120184687	120184677	131	4.91153	120184725	3.9259	120184725	100	120184625
261	chr13	99414450	99415649	+	1200	0	99414797	99415027	99414872	99414912	231	4.91131	99414925	3.90874	99414925	100	99414875
262	chr7	100894200	100894699	+	500	0	100894392	100894582	100894467	100894487	191	4.90957	100894475	3.90636	100894475	71.5522	100894475
263	chr8	26848050	26848849	+	800	0	26848347	26848402	26848322	26848374	56	4.9091	26848325	3.88469	26848325	63.2424	26848375
264	chr11	88252700	88253649	+	950	0	88253072	88253157	88253137	88253114	86	4.9089	88253275	3.92084	88253275	88.4379	88253125
265	chr9	107666400	107666949	+	550	0	107666702	107666697	107666622	107666699	-4	4.9086	107666675	3.95769	107666675	63.8391	107666725
266	chr3	102648100	102649199	+	1100	0	102648602	102648622	102648617	102648612	21	4.90852	102648575	3.98963	102648525	100	102648625
267	chr4	148686200	148688899	+	2700	0	148686742	148688537	148686817	148687639	1796	4.9085	148688075	3.90983	148688075	100	148686525
268	chr2	166178750	166179749	+	1000	0	166179122	166179287	166179207	166179204	166	4.90832	166179275	3.89331	166179275	80.7766	166179225
269	chr11	97437500	97438299	+	800	0	97437747	97437872	97437842	97437809	126	4.90824	97438075	3.92259	97438075	100	97437825
270	chr6	128020400	128022849	+	2450	0	128022397	128022052	128022472	128022224	-344	4.90717	128022025	3.87485	128022025	100	128021875
271	chr10	120763550	120764749	+	1200	0	120764252	120764172	120764087	120764212	-79	4.90532	120764475	3.90234	120764475	85.3193	120764075
272	chr8	84836950	84838249	+	1300	0	84837452	84837712	84837707	84837582	261	4.90426	84837725	3.94287	84837675	95.6802	84837625
273	chr18	61054150	61054849	+	700	0	61054462	61054572	61054537	61054517	111	4.904	61054525	3.88354	61054575	100	61054475
274	chr4	100795900	100796399	+	500	0	100796257	100796232	100796142	100796244	-24	4.90348	100796125	3.89886	100796125	99.4285	100796175
275	chr9	67574250	67574949	+	700	0	67574332	67574552	67574282	67574442	221	4.90298	67574475	3.99724	67574475	45.6338	67574375
276	chr11	117346850	117349599	+	2750	0	117349382	117349347	117349292	117349364	-34	4.90228	117349225	3.87525	117349125	100	117349225
277	chr13	37854000	37854449	+	450	0	37854152	37854217	37854152	37854184	66	4.90195	37854275	3.94324	37854275	59.0894	37854125
278	chr7	143123550	143124449	+	900	0	143123997	143124012	143124007	143124004	16	4.90089	143124025	3.8901	143124025	100	143123925
279	chr6	52169950	52172599	+	2650	0	52172317	52172447	52172372	52172382	131	4.90046	52172425	3.87343	52172425	100	52172125
280	chr9	65177800	65179599	+	1800	0	65178617	65178982	65178697	65178799	366	4.90002	65178675	3.93822	65178675	100	65178625
281	chr8	111726100	111726849	+	750	0	111726207	111726532	111726327	111726369	326	4.89997	111726475	3.88923	111726475	88.0501	111726425
282	chr2	27377800	27378599	+	800	0	27377952	27378252	27378322	27378102	301	4.8973	27378275	4.03025	27378275	79.4176	27378325
283	chr9	61384700	61386799	+	2100	0	61385862	61386142	61386072	61386002	281	4.89621	61385725	3.87397	61385725	100	61385925
284	chr10	87856000	87856899	+	900	0	87856197	87856637	87856527	87856417	441	4.89588	87856625	3.87093	87856625	84.3088	87856475
285	chr8	120447850	120450799	+	2950	0	120449697	120449797	120449752	120449747	101	4.89561	120449125	3.8625	120449125	100	120449125
286	chr4	154567750	154571999	+	4250	0	154571012	154568352	154571027	154569682	-2659	4.89445	154571175	3.90924	154571175	100	154568175
287	chr4	154540300	154544599	+	4300	0	154543142	154544227	154544157	154543684	1086	4.89271	154541275	3.87429	154541275	100	154543175
288	chr8	120535250	120535999	+	750	0	120535687	120535977	120535827	120535832	291	4.89188	120535675	3.93542	120535675	71.4974	120535775
289	chr3	88534950	88537299	+	2350	0	88536222	88537062	88536937	88536642	841	4.89173	88535275	3.88071	88535275	100	88536275
290	chr6	53677050	53677449	+	400	0	53677062	53677377	53677202	53677219	316	4.89162	53677325	3.90735	53677325	44.6836	53677225
291	chr11	118326800	118327949	+	1150	0	118327157	118327422	118327457	118327289	266	4.89089	118327375	3.96825	118327425	100	118327325
292	chr2	74720850	74721849	+	1000	0	74720967	74721682	74721077	74721324	716	4.89086	74721125	3.98259	74721125	100	74721075
293	chr9	44496850	44498749	+	1900	0	44497692	44497292	44497212	44497492	-399	4.89043	44497575	3.87903	44497575	91.3927	44497175
294	chr11	99146750	99150049	+	3300	0	99148472	99149007	99148892	99148739	536	4.89002	99148575	3.87322	99148575	100	99148175
295	chr6	72221500	72224099	+	2600	0	72222237	72222737	72222662	72222487	501	4.88917	72222675	3.97546	72222675	100	72221975
296	chr1	74035500	74037599	+	2100	0	74036042	74037342	74036212	74036692	1301	4.88862	74037175	3.86501	74037175	100	74036175
297	chr11	69561050	69562499	+	1450	0	69561817	69562317	69561892	69562067	501	4.88779	69561275	3.8639	69561275	100	69561875
298	chr6	37430700	37431749	+	1050	0	37431382	37431557	37431467	37431469	176	4.88633	37431475	3.87756	37431475	79.3139	37431475
299	chr18	80685950	80686999	+	1050	0	80686012	80686137	80686092	80686074	126	4.88308	80686475	3.89609	80686475	81.3331	80686075
300	chr6	72214750	72216549	+	1800	0	72215582	72215867	72215792	72215724	286	4.88304	72215875	3.86534	72215875	100	72215525
301	chr9	114547500	114548299	+	800	0	114547897	114548142	114547972	114548019	246	4.88213	114547875	3.86354	114547875	75.6619	114547975
302	chr18	35844500	35845449	+	950	0	35844772	35845032	35844957	35844902	261	4.88211	35844925	3.91002	35844875	100	35844825
303	chr11	117282450	117285449	+	3000	0	117284667	117284927	117284857	117284797	261	4.88208	117284325	3.9485	117284325	100	117283725
304	chr4	154422300	154427799	+	5500	0	154422727	154422632	154422782	154422679	-94	4.88141	154422775	3.94911	154425875	100	154422575
305	chr18	11882950	11884749	+	1800	0	11883937	11884092	11884017	11884014	156	4.88101	11884475	3.92222	11884475	99.7803	11884525
306	chr1	62648500	62649599	+	1100	0	62648567	62648997	62648922	62648782	431	4.88018	62648675	3.86127	62648675	74.9289	62648925
307	chr9	61311550	61312349	+	800	0	61311977	61312097	61312052	61312037	121	4.87872	61312075	3.86374	61312075	100	61312025
308	chr6	84101750	84103199	+	1450	0	84101867	84102377	84102747	84102122	511	4.87816	84102775	3.86464	84102775	70.0021	84102775
309	chr16	90451700	90452599	+	900	0	90451807	90452247	90452172	90452027	441	4.87746	90452225	4.29179	90452275	74.9082	90452175
310	chr11	115104250	115104649	+	400	0	115104342	115104312	115104322	115104327	-29	4.87527	115104475	3.86944	115104475	52.758	115104325
311	chr18	54718700	54719099	+	400	0	54718867	54719082	54719012	54718974	216	4.87486	54718875	3.85071	54718875	25.3393	54719025
312	chr17	47897800	47898949	+	1150	0	47898767	47898342	47898257	47898554	-424	4.87481	47898325	3.87596	47898325	100	47898225
313	chr9	106383300	106384749	+	1450	0	106383872	106384127	106384002	106383999	256	4.87344	106384575	4.07285	106384575	93.6063	106384175
314	chr2	157473700	157476349	+	2650	0	157473987	157475637	157475642	157474812	1651	4.87338	157474075	3.97478	157474075	100	157474225
315	chr10	120707500	120708999	+	1500	0	120707867	120708127	120707942	120707997	261	4.87335	120708825	3.84352	120708825	100	120707725
316	chr4	154389150	154392399	+	3250	0	154390012	154390062	154390087	154390037	51	4.87227	154389625	3.90382	154389575	100	154389375
317	chr11	112450250	112450849	+	600	0	112450507	112450752	112450597	112450629	246	4.86718	112450625	3.84296	112450625	63.0453	112450625
318	chr7	31051300	31051649	+	350	0	31051442	31051637	31051522	31051539	196	4.86592	31051475	3.90144	31051475	28.8118	31051525
319	chr7	98354100	98355699	+	1600	0	98354647	98354467	98355192	98354557	-179	4.86467	98355225	3.89229	98355225	93.3646	98355175
320	chr4	107624800	107625949	+	1150	0	107625332	107625107	107625037	107625219	-224	4.86392	107625775	3.84495	107625775	100	107625025
321	chr7	66218000	66218549	+	550	0	66218197	66218372	66218242	66218284	176	4.8631	66218275	3.83847	66218275	87.6188	66218275
322	chr2	25176650	25178999	+	2350	0	25178052	25177537	25177462	25177794	-514	4.86199	25177525	3.86946	25177525	97.2045	25177525
323	chr4	118275500	118278149	+	2650	0	118276302	118276407	118276332	118276354	106	4.86173	118276225	3.83824	118276225	100	118276275
324	chr1	93220950	93221399	+	450	0	93221197	93221367	93221282	93221282	171	4.86124	93221225	3.84218	93221225	89.0148	93221275
325	chr1	89568500	89569349	+	850	0	89568802	89568917	89568842	89568859	116	4.86063	89569125	3.8889	89569125	100	89568875
326	chr10	120418650	120419499	+	850	0	120418807	120419242	120418877	120419024	436	4.86008	120418825	3.96694	120418825	71.1274	120418875
327	chr4	45508750	45510549	+	1800	0	45509582	45510197	45509592	45509889	616	4.859	45509425	3.83788	45509425	100	45509575
328	chr7	142571500	142574799	+	3300	0	142572202	142572967	142572892	142572584	766	4.85837	142572725	3.89625	142572725	100	142572175
329	chr4	108363550	108364549	+	1000	0	108363967	108364352	108364042	108364159	386	4.85777	108364125	3.84577	108364125	100	108363925
330	chr11	88687600	88689949	+	2350	0	88688777	88689352	88689277	88689064	576	4.85733	88689275	3.98911	88689275	100	88689225
331	chr9	114536450	114537599	+	1150	0	114537042	114537267	114537122	114537154	226	4.85614	114537025	3.85219	114537025	100	114537025
332	chr4	140622850	140624599	+	1750	0	140624077	140624077	140624152	140624077	1	4.85578	140624225	3.85716	140624225	100	140624125
333	chr5	142384900	142385649	+	750	0	142385152	142385562	142385227	142385357	411	4.85578	142385225	3.84409	142385225	87.5853	142385275
334	chr14	27043150	27046449	+	3300	0	27044797	27044927	27044862	27044862	131	4.85437	27044775	3.89612	27044775	100	27044725
335	chr10	60807900	60809549	+	1650	0	60808127	60809212	60808187	60808669	1086	4.85435	60808125	3.92292	60808125	100	60808175
336	chr4	32158650	32159149	+	500	0	32158887	32159007	32158962	32158947	121	4.85388	32158825	3.8391	32158825	91.4299	32158925
337	chr15	82960400	82962149	+	1750	0	82961212	82961512	82961287	82961362	301	4.85381	82961325	3.87709	82961325	100	82961175
338	chr15	76332100	76332749	+	650	0	76332377	76332672	76332557	76332524	296	4.85353	76332475	3.83128	76332475	96.7333	76332525
339	chr11	70233050	70233499	+	450	0	70233147	70233312	70233217	70233229	166	4.85197	70233225	3.89927	70233225	92.7127	70233275
340	chr6	30580050	30580349	+	300	0	30580062	30580217	30580137	30580139	156	4.8517	30580175	3.84229	30580175	49.8873	30580175
341	chr6	72696600	72697799	+	1200	0	72696837	72697157	72696987	72696997	321	4.85149	72696975	3.83442	72696975	89.6185	72696975
342	chr8	84971000	84971549	+	550	0	84971162	84971297	84971237	84971229	136	4.85101	84971225	4.1344	84971175	67.0379	84971225
343	chr10	127614000	127617749	+	3750	0	127615772	127615892	127615817	127615832	121	4.85077	127616575	3.83302	127616575	100	127615525
344	chr11	120241500	120244499	+	3000	0	120242662	120243512	120242737	120243087	851	4.84949	120243225	3.8577	120243225	100	120242625
345	chr14	25586500	25588549	+	2050	0	25587872	25587672	25587952	25587772	-199	4.84946	25588275	3.82671	25588275	100	25587475
346	chr4	148984950	148988099	+	3150	0	148985512	148985707	148985592	148985609	196	4.84852	148985875	3.86904	148986625	100	148985525
347	chr13	53193000	53193849	+	850	0	53193607	53193197	53193732	53193402	-409	4.84748	53193125	4.02197	53193125	65.4874	53193675
348	chr5	144257250	144259099	+	1850	0	144258432	144257567	144258452	144257999	-864	4.84535	144257575	3.83482	144257525	99.1398	144258475
349	chr6	88321100	88321749	+	650	0	88321367	88321597	88321522	88321482	231	4.84479	88321575	3.85127	88321575	97.6977	88321525
350	chr15	76458050	76466899	+	8850	0	76462712	76461317	76461242	76462014	-1394	4.84443	76461225	4.03746	76462325	100	76460075
351	chr6	120472050	120472599	+	550	0	120472327	120472452	120472382	120472389	126	4.84336	120472375	3.82657	120472375	57.4761	120472425
352	chr2	167561950	167563799	+	1850	0	167563167	167563222	167563147	167563194	56	4.84309	167562575	3.83047	167562575	100	167562275
353	chr15	97992250	97992999	+	750	0	97992622	97992967	97992522	97992794	346	4.84096	97992525	3.8636	97992525	81.4484	97992375
354	chr10	45083900	45084799	+	900	0	45084377	45084547	45084452	45084462	171	4.84084	45084175	4.00975	45084175	84.7619	45084425
355	chr10	94249800	94250199	+	400	0	94249802	94250087	94249882	94249944	286	4.83882	94249925	3.85854	94249925	41.5436	94249875
356	chr2	118544800	118545799	+	1000	0	118545232	118545257	118545177	118545244	26	4.83744	118545325	3.90138	118545375	100	118545075
357	chr11	99131400	99132999	+	1600	0	99132307	99132312	99132472	99132309	6	4.83722	99132475	3.81425	99132475	100	99132325
358	chr8	120274900	120276399	+	1500	0	120275352	120275857	120275462	120275604	506	4.83704	120275675	3.81928	120275675	100	120275325
359	chr16	21211500	21212699	+	1200	0	21211647	21211897	21211822	21211772	251	4.83681	21211675	3.82976	21211675	100	21211675
360	chr4	149894150	149896499	+	2350	0	149894402	149895202	149895492	149894802	801	4.83666	149895225	3.94958	149895225	87.3783	149895475
361	chr11	76309350	76313399	+	4050	0	76312357	76309687	76309602	76311022	-2669	4.83635	76312525	3.86425	76312525	100	76309525
362	chr5	118037500	118038149	+	650	0	118037867	118038132	118037937	118037999	266	4.8362	118037975	3.86921	118037975	55.58	118038025
363	chr10	43740750	43741899	+	1150	0	43741047	43741127	43741057	43741087	81	4.83602	43741125	3.82378	43741125	76.7533	43741075
364	chr2	118927250	118928499	+	1250	0	118927587	118927882	118927622	118927734	296	4.83531	118927925	4.01248	118927925	80.8376	118927575
365	chr9	14642650	14643849	+	1200	0	14643182	14643427	14643257	14643304	246	4.8353	14643175	3.8146	14643175	100	14643175
366	chr5	36372550	36375099	+	2550	0	36374292	36374447	36374367	36374369	156	4.83526	36374575	3.81893	36374575	100	36374275
367	chr4	128715000	128717049	+	2050	0	128715222	128715577	128715502	128715399	356	4.83489	128715475	3.82169	128715475	100	128715375
368	chr1	38630600	38631899	+	1300	0	38630767	38631787	38630822	38631277	1021	4.8348	38630925	3.90116	38630925	100	38630825
369	chr18	34247800	34248249	+	450	0	34247877	34247962	34247912	34247919	86	4.83473	34247975	3.84308	34247975	82.9345	34247925
370	chr18	69574900	69575299	+	400	0	69574982	69575172	69575097	69575077	191	4.83457	69575125	3.82191	69575125	90.7652	69575075
371	chr8	71497650	71498699	+	1050	0	71498212	71498472	71498327	71498342	261	4.83435	71498375	3.83379	71498425	100	71498175
372	chr17	47909700	47910049	+	350	0	47909792	47910027	47909927	47909909	236	4.83353	47909875	3.84249	47909875	73.2866	47909875
373	chr17	25555650	25556649	+	1000	0	25556227	25555987	25555932	25556107	-239	4.8328	25556425	3.84977	25556425	84.2131	25555875
374	chr8	15004150	15005549	+	1400	0	15004742	15004862	15004812	15004802	121	4.83192	15004775	3.80869	15004775	100	15004725
375	chr9	63973600	63975849	+	2250	0	63974457	63974707	63974587	63974582	251	4.83178	63974625	3.84073	63974575	100	63974525
376	chr2	93013950	93014749	+	800	0	93014382	93014382	93014327	93014382	1	4.83127	93014375	3.85934	93014375	100	93014325
377	chr6	127336450	127337199	+	750	0	127336542	127336777	127336682	127336659	236	4.83083	127336775	3.8269	127336775	100	127336675
378	chr19	5058150	5061549	+	3400	0	5059442	5059917	5059812	5059679	476	4.83074	5059825	3.85786	5059825	100	5059175
379	chr8	120542400	120543849	+	1450	0	120543057	120542827	120543087	120542942	-229	4.83038	120543025	3.91751	120543025	100	120543075
380	chr1	168379800	168382949	+	3150	0	168382262	168382722	168382647	168382492	461	4.82962	168382425	3.85701	168382425	100	168381325
381	chr6	126134100	126134499	+	400	0	126134237	126134382	126134312	126134309	146	4.82895	126134325	3.85451	126134325	53.9572	126134325
382	chr4	125563850	125565299	+	1450	0	125564387	125564822	125564577	125564604	436	4.82879	125564525	3.8163	125564525	96.7088	125564575
383	chr15	57976750	57977299	+	550	0	57976902	57977217	57977142	57977059	316	4.82793	57976925	3.82399	57976875	60.6573	57977125
384	chr12	3780450	3781599	+	1150	0	3781087	3781202	3781192	3781144	116	4.82735	3781275	4.09814	3780625	100	3780575
385	chr8	44971300	44971699	+	400	0	44971392	44971602	44971477	44971497	211	4.82679	44971525	3.95925	44971525	65.4563	44971475
386	chr9	42865300	42865749	+	450	0	42865567	42865702	42865637	42865634	136	4.82592	42865575	3.83841	42865575	92.045	42865625
387	chr8	84742450	84746699	+	4250	0	84745452	84745262	84745182	84745357	-189	4.82529	84743875	3.82172	84743875	100	84744525
388	chr2	33300050	33301449	+	1400	0	33300432	33300577	33300502	33300504	146	4.82425	33300375	3.84546	33300375	100	33300375
389	chr17	66710950	66711549	+	600	0	66710967	66711367	66710977	66711167	401	4.82402	66711375	3.80612	66711375	48.889	66710975
390	chr9	44720000	44720749	+	750	0	44720297	44720427	44720372	44720362	131	4.82329	44720525	3.80834	44720525	74.4042	44720425
391	chr11	117888350	117891199	+	2850	0	117890637	117889982	117890712	117890309	-654	4.82317	117889875	3.96145	117889825	100	117889925
392	chr2	118815300	118815699	+	400	0	118815327	118815332	118815402	118815329	6	4.82294	118815575	3.85174	118815525	27.7194	118815525
393	chr5	142127250	142128499	+	1250	0	142127917	142127957	142127997	142127937	41	4.82237	142127975	3.88941	142127975	72.2902	142127975
394	chr15	84239100	84239949	+	850	0	84239247	84239642	84239312	84239444	396	4.82224	84239325	3.81502	84239325	97.9046	84239275
395	chr1	136136150	136139049	+	2900	0	136137902	136138487	136138417	136138194	586	4.8218	136138675	4.01653	136138675	100	136136525
396	chr12	112404800	112405849	+	1050	0	112405042	112405072	112405117	112405057	31	4.82137	112405075	3.81831	112405075	75.6807	112405025
397	chr19	55667250	55667899	+	650	0	55667692	55667467	55667757	55667579	-224	4.82089	55667475	4.0807	55667475	65.934	55667425
398	chr18	61043200	61044899	+	1700	0	61043327	61043522	61043457	61043424	196	4.8197	61043775	3.8474	61043775	100	61043425
399	chr1	89734150	89734849	+	700	0	89734382	89734467	89734392	89734424	86	4.81888	89734425	3.80674	89734425	70.802	89734375
400	chr4	110124950	110125349	+	400	0	110125142	110125202	110125172	110125172	61	4.81799	110125175	3.79822	110125175	68.1528	110125175
401	chr2	162638650	162638999	+	350	0	162638802	162638852	162638857	162638827	51	4.8174	162638825	3.8331	162638825	63.2923	162638875
402	chr11	97817900	97819199	+	1300	0	97818252	97818847	97818327	97818549	596	4.81718	97818225	3.81353	97818225	100	97818275
403	chr15	102249800	102251099	+	1300	0	102250667	102250692	102250657	102250679	26	4.81607	102250625	3.84834	102250625	100	102250175
404	chr7	80444350	80445149	+	800	0	80444797	80444612	80444892	80444704	-184	4.81595	80444875	3.8115	80444875	76.8267	80444825
405	chr18	35873100	35875549	+	2450	0	35874032	35874607	35874077	35874319	576	4.81593	35874275	3.91352	35874325	100	35874075
406	chr2	91980500	91981149	+	650	0	91980582	91980982	91980697	91980782	401	4.8141	91980725	3.86089	91980775	45.9688	91980625
407	chr8	120408250	120410099	+	1850	0	120409437	120409567	120409512	120409502	131	4.81355	120409725	3.79462	120409725	100	120408425
408	chr1	131970700	131971649	+	950	0	131971027	131971502	131971137	131971264	476	4.8132	131971125	3.88988	131971125	100	131971175
409	chr18	37821800	37823149	+	1350	0	37822022	37822707	37822142	37822364	686	4.81199	37822125	3.83866	37822125	100	37822075
410	chr10	60794900	60796949	+	2050	0	60795687	60795817	60795742	60795752	131	4.81179	60795725	3.80625	60795725	100	60795725
411	chr5	137747500	137747999	+	500	0	137747637	137747807	137747712	137747722	171	4.81142	137747725	3.82119	137747725	100	137747725
412	chr4	133043050	133048449	+	5400	0	133047277	133043392	133043312	133045334	-3884	4.81076	133046025	3.91072	133046025	100	133043225
413	chr2	168634400	168636249	+	1850	0	168634577	168636117	168634677	168635347	1541	4.80922	168634625	3.90482	168634675	100	168634625
414	chr4	154641250	154641599	+	350	0	154641392	154641557	154641472	154641474	166	4.80903	154641475	3.84996	154641475	100	154641475
415	chr3	37658200	37658599	+	400	0	37658397	37658537	37658492	37658467	141	4.80861	37658375	3.89412	37658375	61.6826	37658475
416	chr12	8912700	8913799	+	1100	0	8912832	8912962	8912902	8912897	131	4.80844	8913075	3.80945	8913075	100	8912875
417	chr7	19464600	19465049	+	450	0	19464732	19464887	19464807	19464809	156	4.80828	19464875	3.81564	19464875	83.2572	19464825
418	chr11	118239550	118241149	+	1600	0	118240142	118240447	118240172	118240294	306	4.80811	118240875	3.87064	118240875	100	118240175
419	chr17	27039800	27041699	+	1900	0	27040272	27040287	27040347	27040279	16	4.8078	27040225	3.80611	27040225	100	27040225
420	chr2	38339550	38339899	+	350	0	38339682	38339837	38339757	38339759	156	4.80729	38339775	3.8101	38339775	88.2283	38339725
421	chr4	133116600	133118399	+	1800	0	133117607	133117752	133117682	133117679	146	4.80675	133117625	3.80458	133117625	100	133117675
422	chr15	102242600	102244349	+	1750	0	102243357	102243187	102243487	102243272	-169	4.80616	102242925	3.79936	102242925	100	102243075
423	chr2	167585600	167586599	+	1000	0	167586347	167586252	167586352	167586299	-94	4.80589	167585975	3.79845	167585975	100	167586425
424	chr12	85200600	85202049	+	1450	0	85201607	85201762	85201687	85201684	156	4.80537	85201625	3.81708	85201625	100	85201575
425	chr2	27633500	27634549	+	1050	0	27633792	27634537	27633847	27634164	746	4.80468	27633875	3.82833	27633875	95.4266	27633925
426	chr15	84841800	84843749	+	1950	0	84842677	84843617	84843542	84843147	941	4.80462	84842775	3.79343	84842775	100	84843525
427	chr2	174015400	174015749	+	350	0	174015542	174015607	174015562	174015574	66	4.80349	174015575	3.79938	174015575	60.2854	174015525
428	chr14	28471200	28472149	+	950	0	28471782	28471637	28471857	28471709	-144	4.80348	28471825	3.85636	28471775	92.4419	28471775
429	chr12	84847800	84848599	+	800	0	84847912	84848162	84847987	84848037	251	4.8028	84848075	3.92945	84848075	97.9199	84847975
430	chr2	168633150	168634099	+	950	0	168633492	168633487	168633837	168633489	-4	4.80266	168633825	3.83316	168633825	97.7349	168633875
431	chr17	28391900	28392399	+	500	0	28391987	28392262	28392117	28392124	276	4.80248	28392175	3.81401	28392175	54.6801	28392075
432	chr8	120555750	120557949	+	2200	0	120556507	120557082	120556982	120556794	576	4.80186	120557125	3.85398	120557125	100	120556225
433	chr4	41664600	41665899	+	1300	0	41665112	41665197	41665132	41665154	86	4.80185	41665075	3.81928	41665075	100	41665025
434	chr9	35283350	35284049	+	700	0	35283507	35283617	35283577	35283562	111	4.80124	35283875	3.84067	35283875	100	35283525
435	chr7	81454700	81455299	+	600	0	81455022	81455102	81455077	81455062	81	4.80118	81454925	3.87902	81454925	70.079	81455075
436	chr11	24296650	24297549	+	900	0	24297337	24297312	24297377	24297324	-24	4.80067	24297325	3.81375	24297325	68.4991	24297425
437	chr1	91826700	91827549	+	850	0	91826862	91827162	91827067	91827012	301	4.79821	91827125	3.82819	91827125	87.1456	91827025
438	chr9	102841750	102843849	+	2100	0	102842492	102842067	102841992	102842279	-424	4.79699	102842475	3.82132	102842475	100	102842075
439	chr4	118360500	118361099	+	600	0	118360687	118360922	118360847	118360804	236	4.79523	118360875	3.82592	118360875	69.224	118360875
440	chr5	125140050	125141349	+	1300	0	125140782	125140782	125140742	125140782	1	4.79468	125140925	3.79295	125140925	100	125140225
441	chr18	55196300	55197299	+	1000	0	55196352	55196732	55196377	55196542	381	4.79451	55197125	3.78822	55197125	50.9353	55196375
442	chr9	65191000	65191949	+	950	0	65191522	65191452	65191672	65191487	-69	4.79404	65191225	3.7931	65191175	62.4052	65191625
443	chr12	107652800	107653699	+	900	0	107653362	107653477	107653402	107653419	116	4.79354	107653425	3.92068	107653425	100	107653325
444	chr13	53193950	53196149	+	2200	0	53194342	53194197	53194442	53194269	-144	4.79267	53195225	3.80845	53195225	87.9836	53194125
445	chr11	97566600	97567249	+	650	0	97566712	97566602	97566757	97566657	-109	4.79225	97567075	3.82756	97567075	55.1489	97566725
446	chr8	108028550	108029149	+	600	0	108028857	108028917	108028862	108028887	61	4.79097	108028775	3.88707	108028775	64.6476	108028875
447	chr15	84593900	84594399	+	500	0	84593902	84594032	84593962	84593967	131	4.79009	84594225	3.88973	84594225	50.1747	84593975
448	chr8	120531350	120535099	+	3750	0	120531987	120533467	120532062	120532727	1481	4.79004	120533175	3.80204	120533175	100	120531975
449	chr5	107111900	107112599	+	700	0	107111937	107112062	107112027	107111999	126	4.79001	107112425	3.88086	107112425	76.2922	107112025
450	chr10	60373000	60374399	+	1400	0	60373847	60374217	60373932	60374032	371	4.78999	60374075	3.82526	60374075	100	60374025
451	chr2	27813200	27813999	+	800	0	27813417	27813672	27813577	27813544	256	4.78892	27813575	3.97225	27813575	94.8935	27813575
452	chr12	79965400	79965849	+	450	0	79965447	79965822	79965747	79965634	376	4.78882	79965525	3.80722	79965525	49.2165	79965725
453	chr3	88149300	88151849	+	2550	0	88150472	88150667	88150542	88150569	196	4.78849	88150575	3.99078	88150575	100	88150275
454	chr17	49808850	49809299	+	450	0	49808947	49809137	49809032	49809042	191	4.78798	49809075	3.80723	49809075	75.1455	49809025
455	chr12	17711050	17712599	+	1550	0	17712207	17712182	17712027	17712194	-24	4.78705	17712075	3.78061	17712075	100	17712025
456	chr1	155213000	155213899	+	900	0	155213397	155213192	155213467	155213294	-204	4.786	155213275	3.78324	155213275	85.3892	155213425
457	chr15	92755000	92755249	+	250	0	92755032	92755132	92755092	92755082	101	4.78579	92755125	3.85595	92755125	43.6134	92755075
458	chr9	57816300	57818699	+	2400	0	57817182	57817557	57817247	57817369	376	4.78564	57817425	3.84694	57817425	91.3927	57817275
459	chr9	65155800	65157449	+	1650	0	65156462	65156567	65156492	65156514	106	4.78557	65156625	3.89345	65156625	100	65156525
460	chr7	19560200	19561099	+	900	0	19560552	19560712	19560627	19560632	161	4.78536	19560675	3.79994	19560675	87.6857	19560675
461	chr11	33122450	33123249	+	800	0	33122612	33122782	33122707	33122697	171	4.78348	33122725	3.80541	33122725	100	33122675
462	chr1	74094250	74095099	+	850	0	74094677	74094672	74094537	74094674	-4	4.78346	74094675	3.7687	74094675	100	74094525
463	chr8	105700200	105700549	+	350	0	105700287	105700367	105700347	105700327	81	4.78295	105700425	3.7979	105700425	77.1519	105700325
464	chr7	112690800	112692549	+	1750	0	112691722	112691697	112691617	112691709	-24	4.78174	112691875	3.88146	112691875	100	112691675
465	chr15	101065950	101066949	+	1000	0	101066387	101066502	101066452	101066444	116	4.78128	101066475	3.78909	101066475	100	101066325
466	chr1	90050200	90050899	+	700	0	90050312	90050787	90050712	90050549	476	4.78071	90050725	3.78781	90050725	58.9815	90050725
467	chr8	94900450	94901749	+	1300	0	94901137	94901207	94901212	94901172	71	4.78032	94901275	3.86768	94901325	100	94901125
468	chr3	101068600	101069149	+	550	0	101068832	101069062	101068987	101068947	231	4.78007	101068925	3.78621	101068925	54.7073	101068975
469	chr15	77202900	77203499	+	600	0	77203037	77203312	77203187	77203174	276	4.77934	77203125	3.92692	77203125	98.4797	77203175
470	chr8	120260550	120262449	+	1900	0	120261927	120261412	120260882	120261669	-514	4.77906	120262125	3.79998	120262125	82.8214	120262025
471	chr11	43547900	43548599	+	700	0	43548077	43548262	43548152	43548169	186	4.77887	43548125	3.76647	43548125	96.111	43548175
472	chr1	192822550	192824249	+	1700	0	192823957	192823742	192823717	192823849	-214	4.77792	192824075	3.7791	192824075	74.0229	192824025
473	chr1	171250500	171252849	+	2350	0	171250977	171251217	171251052	171251097	241	4.77715	171251425	3.81019	171251375	100	171251075
474	chr4	100925900	100926899	+	1000	0	100926242	100926327	100926317	100926284	86	4.77655	100926275	3.8039	100926275	40.2016	100926275
475	chr6	115956650	115958049	+	1400	0	115957867	115957602	115957942	115957734	-264	4.7755	115957825	3.88724	115957825	100	115957875
476	chr4	117303950	117304599	+	650	0	117304002	117304262	117304192	117304132	261	4.77512	117304175	3.91343	117304125	83.5697	117304175
477	chr8	120503900	120505749	+	1850	0	120504432	120504742	120504542	120504587	311	4.77482	120505525	3.7837	120505525	100	120504225
478	chr8	120484900	120486149	+	1250	0	120485232	120485307	120485292	120485269	76	4.7744	120485125	3.78351	120485125	98.5257	120485225
479	chr7	100910900	100912199	+	1300	0	100911847	100912032	100911922	100911939	186	4.77431	100911675	3.86932	100911625	93.521	100911525
480	chr7	16921000	16922999	+	2000	0	16922067	16921277	16922312	16921672	-789	4.7733	16922325	3.80959	16922325	100	16921175
481	chr1	91596550	91596949	+	400	0	91596587	91596812	91596662	91596699	226	4.77309	91596775	3.80567	91596775	40.9846	91596675
482	chr2	168167750	168169399	+	1650	0	168168447	168169317	168168512	168168882	871	4.77253	168168525	3.78232	168168525	100	168168475
483	chr12	3834700	3835349	+	650	0	3834712	3835282	3835217	3834997	571	4.77248	3834975	3.77368	3834975	78.7946	3834925
484	chr3	104793650	104794699	+	1050	0	104794147	104794302	104794237	104794224	156	4.77184	104794525	3.9179	104794525	98.8489	104794225
485	chr4	135570400	135571199	+	800	0	135570752	135570997	135570887	135570874	246	4.77141	135570925	3.79838	135570875	100	135570625
486	chr8	45857750	45858149	+	400	0	45857907	45858067	45857992	45857987	161	4.77132	45858025	3.82365	45857975	89.1682	45857975
487	chr11	102579200	102579949	+	750	0	102579597	102579772	102579692	102579684	176	4.77074	102579625	3.79843	102579625	91.805	102579675
488	chr4	114677500	114678899	+	1400	0	114678047	114678187	114678112	114678117	141	4.77043	114678425	3.78342	114678425	94.4346	114678175
489	chr4	131370300	131370949	+	650	0	131370302	131370672	131370597	131370487	371	4.77031	131370675	3.79155	131370675	94.5501	131370575
490	chr11	88552850	88556749	+	3900	0	88555452	88553567	88555527	88554509	-1884	4.76974	88553725	3.76306	88553725	100	88553475
491	chr12	109830600	109831199	+	600	0	109830802	109830967	109830877	109830884	166	4.76953	109830875	3.79884	109830875	99.7375	109830875
492	chr1	157047850	157048699	+	850	0	157048402	157048112	157048507	157048257	-289	4.76914	157048425	3.82588	157048425	46.3308	157047925
493	chr18	84074200	84075599	+	1400	0	84074862	84075062	84074922	84074962	201	4.76892	84074975	3.7744	84074975	100	84074875
494	chr14	32202600	32202999	+	400	0	32202712	32202827	32202752	32202769	116	4.76819	32202825	3.76056	32202825	58.6323	32202825
495	chr4	149875150	149878749	+	3600	0	149876562	149876787	149876637	149876674	226	4.76818	149876425	3.80314	149876425	100	149875325
496	chr8	120334550	120337299	+	2750	0	120335567	120335727	120335642	120335647	161	4.76789	120335625	3.75867	120335625	100	120335325
497	chr1	178551850	178554149	+	2300	0	178552842	178553537	178552912	178553189	696	4.76645	178553825	3.86062	178553825	91.7912	178552975
498	chr11	68220650	68221649	+	1000	0	68220682	68220892	68220802	68220787	211	4.7664	68220825	3.79433	68220825	100	68220775
499	chr11	117343700	117346249	+	2550	0	117344777	117344872	117344797	117344824	96	4.766	117344725	3.78611	117344725	100	117344675
500	chr18	25546350	25546949	+	600	0	25546557	25546417	25546587	25546487	-139	4.76523	25546625	3.81658	25546625	65.9728	25546625
501	chr14	70203250	70204549	+	1300	0	70203917	70204027	70203952	70203972	111	4.76519	70203525	3.78713	70204125	100	70203925
502	chr17	46083850	46084699	+	850	0	46084212	46084537	46084282	46084374	326	4.76495	46084075	3.80768	46084075	100	46084225
503	chr4	45491400	45494749	+	3350	0	45493767	45494227	45494142	45493997	461	4.76469	45493125	4.18516	45494075	100	45491725
504	chr6	115776000	115776399	+	400	0	115776162	115776187	115776177	115776174	26	4.76464	115776225	3.87503	115776225	75.6973	115776175
505	chr8	120376300	120378449	+	2150	0	120377437	120377627	120377557	120377532	191	4.76377	120378325	3.77746	120378325	100	120376925
506	chr2	74727300	74728899	+	1600	0	74727437	74727672	74727562	74727554	236	4.76339	74727525	3.82842	74727575	100	74727475
507	chr5	121934650	121935749	+	1100	0	121935247	121935022	121934947	121935134	-224	4.76195	121934875	3.8706	121934875	86.0832	121934925
508	chr8	84740950	84742299	+	1350	0	84741997	84742207	84742132	84742102	211	4.76135	84741925	3.78392	84741925	91.0549	84742075
509	chr2	147928200	147928499	+	300	0	147928262	147928427	147928342	147928344	166	4.76126	147928375	3.78081	147928375	47.1734	147928325
510	chr2	26316350	26317299	+	950	0	26316547	26316847	26316727	26316697	301	4.76025	26317075	3.74886	26317075	62.4103	26316975
511	chr9	77496800	77497299	+	500	0	77497042	77497272	77497137	77497157	231	4.75937	77497025	3.79607	77497025	52.9526	77497175
512	chr2	30721400	30722449	+	1050	0	30721962	30722217	30722037	30722089	256	4.75917	30722225	3.79991	30722225	100	30721925
513	chr19	46528350	46530399	+	2050	0	46529842	46529092	46529022	46529467	-749	4.75904	46530225	3.83246	46528975	100	46529025
514	chr5	35525500	35526349	+	850	0	35525942	35526082	35526007	35526012	141	4.75865	35526025	3.78085	35526025	90.1149	35526025
515	chr18	35721950	35722799	+	850	0	35722312	35722657	35722442	35722484	346	4.7586	35722125	3.79987	35722125	78.3859	35722475
516	chr11	113016550	113017649	+	1100	0	113016932	113016937	113016942	113016934	6	4.75807	113016875	3.92347	113016875	100	113016875
517	chr12	107807600	107808549	+	950	0	107807952	107808337	107807792	107808144	386	4.758	107808325	3.78167	107808325	97.2316	107807825
518	chr14	47534150	47534399	+	250	0	47534152	47534277	47534202	47534214	126	4.75768	47534275	3.80533	47534275	18.7749	47534225
519	chr4	32304100	32306599	+	2500	0	32304557	32304347	32304272	32304452	-209	4.75612	32304775	3.75469	32304775	67.8827	32304275
520	chr8	119832800	119833299	+	500	0	119833012	119833212	119833092	119833112	201	4.75551	119833075	3.76155	119833075	89.5321	119833075
521	chr11	60177350	60178999	+	1650	0	60177922	60178327	60178022	60178124	406	4.75539	60178275	3.74512	60178275	100	60177525
522	chr4	114842350	114842699	+	350	0	114842487	114842652	114842582	114842569	166	4.75527	114842575	3.97445	114842575	94.1202	114842575
523	chr12	86172100	86173699	+	1600	0	86173152	86173282	86173227	86173217	131	4.75464	86173275	3.76831	86173275	100	86173225
524	chr15	102100950	102104799	+	3850	0	102102697	102102302	102102252	102102499	-394	4.75345	102102175	3.81523	102102175	100	102101625
525	chr15	101067050	101067849	+	800	0	101067162	101067297	101067222	101067229	136	4.75345	101067325	3.85699	101067375	100	101067175
526	chr7	72751450	72751899	+	450	0	72751577	72751717	72751642	72751647	141	4.75309	72751725	3.75224	72751725	49.3914	72751675
527	chr4	58664650	58665099	+	450	0	58664797	58664977	58664872	58664887	181	4.75301	58664875	4.00905	58664875	39.117	58664875
528	chr2	166148850	166150349	+	1500	0	166149717	166149962	166149792	166149839	246	4.75169	166149775	3.78199	166149775	100	166149725
529	chr12	86807550	86808099	+	550	0	86807627	86807912	86807717	86807769	286	4.75146	86807775	3.74302	86807775	100	86807725
530	chr18	35846000	35851499	+	5500	0	35848962	35849167	35849037	35849064	206	4.75081	35849775	3.95211	35847525	100	35848375
531	chr3	102193300	102195449	+	2150	0	102194397	102193527	102194472	102193962	-869	4.74954	102193675	3.88103	102193625	75.7805	102193575
532	chr8	26828800	26829349	+	550	0	26829057	26829207	26829132	26829132	151	4.74822	26829075	3.76043	26829075	62.3292	26829125
533	chr5	136771350	136771699	+	350	0	136771662	136771662	136771697	136771662	1	4.74789	136771525	3.78309	136771525	67.739	136771625
534	chr11	102608550	102611749	+	3200	0	102611527	102610217	102611637	102610872	-1309	4.74787	102610825	3.74306	102610825	100	102610075
535	chr10	40638000	40639349	+	1350	0	40639277	40639057	40638377	40639167	-219	4.74768	40638975	3.75776	40638975	60.2	40638425
536	chr4	45505850	45507999	+	2150	0	45506792	45506992	45506822	45506892	201	4.74594	45506975	3.85718	45506575	100	45506575
537	chr13	92633550	92633899	+	350	0	92633647	92633862	92633752	92633754	216	4.74591	92633725	3.76029	92633725	42.9928	92633775
538	chr10	61831050	61831749	+	700	0	61831412	61831687	61831552	61831549	276	4.74555	61831375	3.78358	61831375	55.8963	61831525
539	chr2	178121050	178121949	+	900	0	178121402	178121522	178121437	178121462	121	4.74376	178121525	3.73529	178121525	91.9156	178121475
540	chr12	112151100	112152049	+	950	0	112151587	112151797	112151722	112151692	211	4.74365	112151375	3.74633	112151375	100	112151575
541	chr12	86815850	86817749	+	1900	0	86816972	86817337	86816982	86817154	366	4.74334	86816225	3.79297	86816225	100	86816925
542	chr4	45513450	45514849	+	1400	0	45513717	45514072	45513807	45513894	356	4.74244	45514625	3.75815	45514675	100	45513825
543	chr11	102963250	102964149	+	900	0	102963752	102963557	102963482	102963654	-194	4.74002	102963825	3.78752	102963825	88.3077	102963775
544	chr9	96979150	96980949	+	1800	0	96980137	96980247	96980182	96980192	111	4.73987	96979825	3.73312	96979825	100	96979525
545	chr5	134555200	134555549	+	350	0	134555257	134555542	134555327	134555399	286	4.73956	134555375	3.73403	134555375	67.1694	134555425
546	chr18	54828050	54829599	+	1550	0	54828927	54828617	54829002	54828772	-309	4.73905	54828925	3.7996	54828925	87.7146	54828525
547	chr2	74722050	74722549	+	500	0	74722372	74722472	74722452	74722422	101	4.73843	74722275	3.75495	74722275	82.5951	74722425
548	chr5	24425950	24427899	+	1950	0	24426622	24426722	24426692	24426672	101	4.73842	24426825	3.78197	24426825	94.3884	24426675
549	chr18	75372700	75375899	+	3200	0	75374207	75374147	75374072	75374177	-59	4.73825	75374825	3.80372	75374825	100	75374175
550	chr5	113467650	113469349	+	1700	0	113468587	113468767	113468682	113468677	181	4.73811	113468775	3.82465	113468775	100	113468625
551	chr11	114849650	114850899	+	1250	0	114850232	114849847	114850307	114850039	-384	4.73768	114850625	3.80543	114850625	64.8908	114850225
552	chr7	142481450	142482599	+	1150	0	142482067	142482492	142482352	142482279	426	4.73716	142482125	3.74034	142482125	99.5623	142482375
553	chr11	85918250	85919149	+	900	0	85918562	85918802	85918682	85918682	241	4.737	85918725	3.78608	85918725	87.9759	85918875
554	chr15	93105900	93106299	+	400	0	93105917	93105997	93105937	93105957	81	4.73684	93106125	3.76305	93106125	45.6771	93106025
555	chr10	128091400	128092299	+	900	0	128091752	128091917	128091842	128091834	166	4.73674	128091975	3.74282	128091975	100	128091825
556	chr8	91712450	91712999	+	550	0	91712827	91712972	91712897	91712899	146	4.73663	91712625	3.74895	91712625	63.021	91712775
557	chr8	84198900	84200949	+	2050	0	84200127	84200277	84200202	84200202	151	4.73563	84200125	3.80394	84200125	100	84200075
558	chr17	29457450	29458849	+	1400	0	29457922	29458267	29457982	29458094	346	4.73516	29458225	3.78427	29458225	100	29458175
559	chr9	102839950	102840649	+	700	0	102840192	102840312	102840237	102840252	121	4.73513	102840175	3.75365	102840175	100	102840225
560	chr2	59772350	59772749	+	400	0	59772507	59772647	59772572	59772577	141	4.73415	59772575	3.73759	59772575	94.4576	59772575
561	chr11	59308250	59309449	+	1200	0	59308252	59308907	59308357	59308579	656	4.73389	59309175	3.73552	59309175	79.9383	59308375
562	chr9	121320000	121320699	+	700	0	121320472	121320197	121320122	121320334	-274	4.73319	121320475	3.78373	121320525	62.4966	121320575
563	chr5	102070700	102071149	+	450	0	102070887	102071122	102070992	102071004	236	4.73287	102070925	3.74728	102070925	86.9549	102071025
564	chr10	80139250	80139649	+	400	0	80139417	80139582	80139492	80139499	166	4.73276	80139525	3.73371	80139525	52.9456	80139475
565	chr2	165652050	165654599	+	2550	0	165652497	165653327	165653252	165652912	831	4.73273	165653325	3.81172	165653325	100	165652675
566	chr4	106987650	106988149	+	500	0	106987792	106988082	106987787	106987937	291	4.73227	106987975	3.80389	106987975	66.5268	106987775
567	chr5	119685450	119686099	+	650	0	119685667	119685822	119685737	119685744	156	4.73198	119685675	3.78042	119685675	100	119685725
568	chr8	121175250	121176249	+	1000	0	121175767	121175512	121175847	121175639	-254	4.73197	121176025	3.72691	121176025	76.4523	121175975
569	chr9	107713650	107715399	+	1750	0	107714997	107714497	107714417	107714747	-499	4.73177	107714375	3.82612	107714375	100	107714275
570	chr3	49867850	49868299	+	450	0	49867862	49868207	49868027	49868034	346	4.73169	49868025	3.7582	49868025	43.9438	49867925
571	chr4	107137100	107139849	+	2750	0	107137907	107138167	107138092	107138037	261	4.73167	107138075	3.76048	107138075	100	107137975
572	chr4	155233400	155234899	+	1500	0	155234122	155234122	155234202	155234122	1	4.73154	155233975	3.73121	155233975	100	155234075
573	chr8	10925450	10927449	+	2000	0	10926547	10926892	10926752	10926719	346	4.73033	10926275	3.78007	10926275	91.507	10926725
574	chr8	71375750	71377199	+	1450	0	71376187	71376472	71376262	71376329	286	4.73001	71376075	3.77892	71376075	97.0077	71376275
575	chr11	119214500	119216749	+	2250	0	119214787	119216132	119215772	119215459	1346	4.72962	119214925	3.75588	119214925	100	119214975
576	chr11	20041150	20042099	+	950	0	20041662	20041672	20041652	20041667	11	4.72932	20041525	3.85497	20041525	100	20041625
577	chr9	63965400	63965899	+	500	0	63965652	63965647	63965687	63965649	-4	4.72926	63965625	3.79042	63965625	69.1107	63965675
578	chr10	81595200	81598499	+	3300	0	81597777	81597997	81597852	81597887	221	4.72923	81597525	3.83259	81595875	100	81595875
579	chr9	21796150	21796699	+	550	0	21796507	21796577	21796512	21796542	71	4.7292	21796525	3.76212	21796475	100	21796475
580	chr4	155177550	155179549	+	2000	0	155178127	155178367	155178182	155178247	241	4.72902	155178275	3.7678	155178625	100	155178075
581	chr11	76262600	76263399	+	800	0	76262617	76262902	76262742	76262759	286	4.72875	76262825	3.74531	76262825	96.405	76262775
582	chr10	127509300	127511049	+	1750	0	127509637	127509782	127509717	127509709	146	4.72864	127510375	3.72687	127510375	100	127509675
583	chr7	128283150	128283999	+	850	0	128283157	128283382	128283252	128283269	226	4.72775	128283875	3.72277	128283875	47.3939	128283325
584	chr16	15862100	15862349	+	250	0	15862177	15862177	15862262	15862177	1	4.72756	15862225	3.79693	15862225	40.0847	15862225
585	chr9	107627550	107631499	+	3950	0	107629872	107628872	107629932	107629372	-999	4.72705	107628725	3.787	107628725	100	107627675
586	chr1	36566400	36566999	+	600	0	36566732	36566892	36566807	36566812	161	4.72646	36566875	3.83098	36566825	70.4407	36566825
587	chr19	45270400	45271149	+	750	0	45270742	45270927	45270817	45270834	186	4.72628	45270575	3.78291	45270575	98.5633	45270875
588	chr10	81406650	81408349	+	1700	0	81406862	81406897	81406952	81406879	36	4.72576	81407125	3.72495	81407125	100	81406925
589	chr1	135577750	135579249	+	1500	0	135577807	135578752	135578677	135578279	946	4.72562	135578825	3.8147	135578775	100	135577875
590	chr8	120486300	120487099	+	800	0	120486452	120486582	120486537	120486517	131	4.72511	120486525	3.74588	120486525	100	120486475
591	chr2	32625100	32626799	+	1700	0	32626587	32625597	32625557	32626092	-989	4.72501	32626625	3.80023	32626625	84.1376	32626625
592	chr2	169789950	169790499	+	550	0	169790117	169790337	169790202	169790227	221	4.72499	169790325	3.81251	169790325	77.4435	169790275
593	chr1	192791350	192792249	+	900	0	192791442	192791832	192791757	192791637	391	4.72478	192792075	3.73511	192792075	72.2124	192791775
594	chr15	101220750	101221699	+	950	0	101220972	101221332	101221107	101221152	361	4.72448	101221125	3.73347	101221125	70.2431	101221125
595	chr4	136949150	136950149	+	1000	0	136949392	136949457	136949497	136949424	66	4.72408	136949775	3.77426	136949775	84.4241	136949525
596	chr12	21146800	21147249	+	450	0	21146882	21146852	21146967	21146867	-29	4.72407	21147025	3.74346	21147075	42.3324	21146875
597	chr12	8804550	8805399	+	850	0	8804602	8805282	8804732	8804942	681	4.7231	8805025	3.75033	8805025	60.24	8804725
598	chr8	126666250	126667699	+	1450	0	126667002	126667262	126667067	126667132	261	4.72282	126667075	3.72876	126667075	100	126667025
599	chr11	120225800	120227549	+	1750	0	120225957	120227377	120226012	120226667	1421	4.72264	120227375	3.73826	120227375	100	120227325
600	chr1	76011050	76011699	+	650	0	76011492	76011477	76011532	76011484	-14	4.72229	76011575	3.78405	76011575	75.6494	76011525
601	chr9	56192000	56192499	+	500	0	56192267	56192392	56192327	56192329	126	4.72188	56192375	3.72843	56192375	49.026	56192375
602	chr14	70170350	70171349	+	1000	0	70170602	70170752	70170677	70170677	151	4.721	70170625	3.72241	70170625	100	70170625
603	chr3	97254800	97256349	+	1550	0	97255847	97255537	97255462	97255692	-309	4.72096	97255875	3.72524	97255875	100	97255425
604	chr2	75315850	75316349	+	500	0	75316112	75316217	75316192	75316164	106	4.72061	75316125	3.71777	75316125	84.998	75316175
605	chr13	51919750	51921899	+	2150	0	51921262	51921462	51921337	51921362	201	4.72041	51920825	3.7934	51920825	91.507	51921275
606	chr11	106267250	106269499	+	2250	0	106268297	106268627	106268657	106268462	331	4.72011	106268575	3.72484	106268575	100	106268525
607	chr8	117293800	117294149	+	350	0	117293972	117293887	117293822	117293929	-84	4.7195	117293975	3.83943	117293975	43.3107	117293875
608	chr17	46613850	46614299	+	450	0	46613862	46614007	46613937	46613934	146	4.71865	46614075	3.75483	46614075	92.1087	46614025
609	chr17	67988900	67990399	+	1500	0	67989672	67989717	67989642	67989694	46	4.71807	67989725	3.76819	67989725	100	67989675
610	chr9	32519250	32520099	+	850	0	32519507	32519892	32519547	32519699	386	4.71762	32519425	3.83321	32519425	60.5285	32519575
611	chr10	118866200	118867599	+	1400	0	118866937	118867452	118867407	118867194	516	4.71702	118866325	3.81592	118866325	42.3887	118867025
612	chr16	90405650	90406449	+	800	0	90405817	90406007	90405897	90405912	191	4.71693	90405825	3.79865	90405825	91.7888	90405875
613	chr8	47340450	47340999	+	550	0	47340587	47340817	47340742	47340702	231	4.71682	47340725	3.75564	47340725	63.6878	47340775
614	chr13	56111650	56114249	+	2600	0	56113207	56113967	56113277	56113587	761	4.71667	56113275	3.73736	56113275	100	56113225
615	chrX	99197200	99197699	+	500	0	99197387	99197692	99197502	99197539	306	4.71663	99197525	3.77951	99197475	54.1445	99197525
616	chr18	54912000	54913399	+	1400	0	54912772	54912957	54912872	54912864	186	4.71651	54912875	3.84742	54912875	77.8643	54912925
617	chr17	12752250	12752899	+	650	0	12752482	12752547	12752537	12752514	66	4.71616	12752525	3.72386	12752525	100	12752525
618	chr11	114028600	114029449	+	850	0	114028852	114028927	114028927	114028889	76	4.71457	114028875	3.86351	114028825	90.8642	114028925
619	chr5	73783200	73784349	+	1150	0	73783727	73783827	73783802	73783777	101	4.71436	73783925	3.75335	73783925	100	73783725
620	chr2	30875000	30876799	+	1800	0	30875497	30875757	30875687	30875627	261	4.71303	30875875	3.72217	30875875	100	30875625
621	chr4	136704050	136705449	+	1400	0	136704212	136704767	136704327	136704489	556	4.71237	136704775	3.78519	136704775	79.4176	136704275
622	chr9	96981150	96982449	+	1300	0	96981402	96981822	96981482	96981612	421	4.71186	96981475	3.81599	96981425	100	96981375
623	chr19	47499550	47499899	+	350	0	47499637	47499722	47499702	47499679	86	4.71166	47499725	3.74102	47499725	63.9545	47499725
624	chr2	166540750	166540999	+	250	0	166540997	166540932	166540992	166540964	-64	4.71136	166540875	3.90262	166540875	28.5329	166540975
625	chr4	155187850	155191049	+	3200	0	155189772	155190127	155190057	155189949	356	4.71123	155190025	3.79372	155188625	100	155189575
626	chr6	5380600	5382199	+	1600	0	5382082	5382087	5382157	5382084	6	4.71071	5381875	3.73734	5381875	69.4187	5380725
627	chr2	157461850	157463399	+	1550	0	157462882	157462972	157462897	157462927	91	4.71067	157462875	3.74848	157462825	100	157462575
628	chr11	119125850	119126699	+	850	0	119126452	119126397	119126367	119126424	-54	4.7105	119126125	3.84866	119126075	100	119126275
629	chr7	140971450	140971749	+	300	0	140971592	140971717	140971667	140971654	126	4.71018	140971625	3.81769	140971625	65.9156	140971675
630	chr6	114882100	114883299	+	1200	0	114882397	114882922	114882472	114882659	526	4.70962	114882575	3.7772	114882575	100	114882425
631	chr9	118694250	118695299	+	1050	0	118694412	118694532	118694462	118694472	121	4.70944	118694375	3.79246	118694425	78.6661	118694475
632	chr4	155162450	155164249	+	1800	0	155163447	155163937	155163522	155163692	491	4.70936	155162825	3.71466	155162825	100	155163475
633	chr4	125407100	125407699	+	600	0	125407192	125407262	125407227	125407227	71	4.70913	125407275	3.71001	125407275	97.2894	125407225
634	chr4	140657050	140658349	+	1300	0	140657917	140658147	140657987	140658032	231	4.70886	140658175	3.70858	140658175	100	140657925
635	chr14	25126850	25128549	+	1700	0	25127542	25127647	25127587	25127594	106	4.70842	25127575	3.88317	25127575	100	25127525
636	chr6	100214250	100215349	+	1100	0	100214612	100214892	100214817	100214752	281	4.70841	100214925	3.8204	100214675	100	100214675
637	chr15	84654500	84655499	+	1000	0	84654722	84654772	84654807	84654747	51	4.70833	84654725	3.73977	84654775	69.0072	84654675
638	chr2	131158900	131159449	+	550	0	131159117	131159072	131159222	131159094	-44	4.70817	131159075	3.84572	131159075	66.5691	131159225
639	chr6	51961000	51961399	+	400	0	51961212	51961257	51961197	51961234	46	4.70793	51961225	3.78278	51961225	64.3739	51961225
640	chr6	36891100	36891449	+	350	0	36891152	36891277	36891227	36891214	126	4.70787	36891325	3.77479	36891325	57.7721	36891225
641	chr12	13175500	13176549	+	1050	0	13176202	13176452	13176382	13176327	251	4.70774	13176175	3.72805	13176175	84.5979	13176375
642	chr10	122887250	122888599	+	1350	0	122887702	122887877	122887782	122887789	176	4.70685	122887925	3.72302	122887925	100	122887775
643	chr19	4126700	4127299	+	600	0	4126807	4126882	4126882	4126844	76	4.70669	4126875	3.70999	4126875	62.1225	4126925
644	chr2	32166450	32167999	+	1550	0	32167132	32167282	32167207	32167207	151	4.7061	32167625	3.72804	32167125	100	32167075
645	chr6	5379700	5380499	+	800	0	5380192	5380272	5380237	5380232	81	4.7058	5380275	3.71166	5380275	70.0172	5380175
646	chr8	110412950	110413549	+	600	0	110413222	110413487	110413362	110413354	266	4.70453	110413375	3.71809	110413375	71.6306	110413325
647	chr2	157375800	157376199	+	400	0	157375937	157375997	157376007	157375967	61	4.70379	157376025	3.75556	157376025	65.9656	157375975
648	chr15	82925350	82926199	+	850	0	82925562	82925902	82925707	82925732	341	4.70303	82925825	3.73964	82925825	100	82925625
649	chr4	133196450	133198249	+	1800	0	133196902	133197832	133197757	133197367	931	4.70295	133198075	3.70561	133198075	100	133196875
650	chr8	119830650	119832749	+	2100	0	119832192	119832407	119832362	119832299	216	4.70286	119831675	3.70304	119831675	100	119831775
651	chr1	163239300	163239849	+	550	0	163239377	163239577	163239457	163239477	201	4.70274	163239525	3.86173	163239525	59.3954	163239475
652	chr15	102258100	102260049	+	1950	0	102258852	102259047	102258967	102258949	196	4.70265	102258975	3.7368	102258975	100	102258725
653	chr11	75462000	75463799	+	1800	0	75462397	75462737	75462582	75462567	341	4.70252	75462425	3.80067	75462425	100	75462375
654	chr15	83025300	83026949	+	1650	0	83025852	83025532	83025932	83025692	-319	4.70208	83026475	3.70969	83026525	88.5557	83025925
655	chr11	120227650	120229099	+	1450	0	120228107	120228322	120228262	120228214	216	4.70194	120228175	3.75535	120228175	100	120228075
656	chr7	16893700	16894949	+	1250	0	16894452	16893962	16894532	16894207	-489	4.70161	16894425	3.75616	16894525	99.7448	16894525
657	chr11	98968200	98970149	+	1950	0	98969607	98968987	98969677	98969297	-619	4.70088	98968925	3.87517	98969675	100	98968875
658	chr11	94245850	94246299	+	450	0	94246097	94246117	94246172	94246107	21	4.70085	94246075	3.79605	94246075	88.3773	94246175
659	chr2	26486150	26487449	+	1300	0	26487067	26487117	26486532	26487092	51	4.70002	26487225	3.70852	26487225	100	26486525
660	chr15	103299000	103302349	+	3350	0	103299967	103301662	103300042	103300814	1696	4.69868	103301575	3.73597	103301575	100	103299975
661	chr8	24427550	24428049	+	500	0	24427662	24427857	24427782	24427759	196	4.69827	24427775	3.72767	24427775	68.9228	24427725
662	chr1	186145650	186145999	+	350	0	186145667	186145837	186145762	186145752	171	4.69741	186145875	3.72461	186145875	42.1381	186145775
663	chr19	5069250	5071299	+	2050	0	5069497	5070407	5070252	5069952	911	4.69735	5071125	3.69794	5071125	100	5069575
664	chr15	78831200	78832949	+	1750	0	78832402	78832297	78832442	78832349	-104	4.69662	78832125	3.74652	78832125	100	78832475
665	chr19	45294850	45295699	+	850	0	45295352	45295337	45295302	45295344	-14	4.6947	45295275	3.85292	45295275	94.0879	45295275
666	chr5	125141600	125142549	+	950	0	125142102	125142382	125142192	125142242	281	4.6946	125141975	3.73233	125141975	92.4037	125142175
667	chr2	165732200	165732649	+	450	0	165732302	165732602	165732482	165732452	301	4.69453	165732425	3.73619	165732475	80.1301	165732425
668	chr6	99438950	99440349	+	1400	0	99439252	99439402	99439327	99439327	151	4.69436	99439375	3.71013	99439375	100	99439275
669	chr5	120577950	120580199	+	2250	0	120579007	120578952	120578857	120578979	-54	4.69419	120579975	3.758	120580025	100	120578775
670	chr5	113121750	113122899	+	1150	0	113121872	113121992	113121942	113121932	121	4.69368	113122325	3.79412	113122375	91.4929	113121925
671	chr2	30849950	30853599	+	3650	0	30851042	30852762	30851122	30851902	1721	4.6936	30851025	3.84604	30851025	100	30850975
672	chr4	111816950	111817299	+	350	0	111817107	111817202	111817182	111817154	96	4.69332	111817175	3.78132	111817175	48.9824	111817175
673	chr15	12480250	12480799	+	550	0	12480347	12480732	12480417	12480539	386	4.69234	12480625	3.78281	12480625	43.8045	12480425
674	chr11	117333950	117334749	+	800	0	117334252	117334412	117334337	117334332	161	4.69209	117334425	3.87533	117334425	100	117334325
675	chr11	77914650	77915999	+	1350	0	77914857	77914982	77914932	77914919	126	4.6917	77915875	3.78363	77915875	100	77914925
676	chr2	33584250	33586399	+	2150	0	33584817	33585017	33584912	33584917	201	4.6913	33585825	3.74874	33585825	100	33584875
677	chr2	172928500	172930349	+	1850	0	172929342	172929277	172929202	172929309	-64	4.69125	172929125	3.83559	172929125	88.8047	172929175
678	chr9	65163300	65164099	+	800	0	65163347	65163537	65163462	65163442	191	4.69088	65163475	3.71567	65163475	77.6897	65163425
679	chr17	28207350	28208249	+	900	0	28207942	28207632	28208007	28207787	-309	4.69076	28208025	3.69873	28208025	89.629	28208075
680	chr12	109405600	109406399	+	800	0	109405887	109406002	109405967	109405944	116	4.6903	109405975	3.7785	109405975	92.8932	109405975
681	chr8	94871150	94872899	+	1750	0	94871647	94871917	94871707	94871782	271	4.69022	94872375	3.76844	94872375	100	94871675
682	chr8	27087900	27089949	+	2050	0	27089022	27089117	27089107	27089069	96	4.6894	27088775	3.72261	27088775	100	27089025
683	chr8	25535550	25538449	+	2900	0	25537487	25537672	25537577	25537579	186	4.68907	25538275	3.76625	25538275	100	25537575
684	chr11	99072050	99072949	+	900	0	99072462	99072682	99072597	99072572	221	4.68835	99072525	3.72667	99072525	100	99072525
685	chr8	56623250	56623899	+	650	0	56623257	56623797	56623702	56623527	541	4.68797	56623725	3.74196	56623725	63.2215	56623675
686	chr2	25333300	25333749	+	450	0	25333567	25333597	25333642	25333582	31	4.68774	25333525	3.71861	25333475	51.6683	25333625
687	chr3	89244450	89244849	+	400	0	89244537	89244697	89244642	89244617	161	4.68743	89244675	3.78115	89244675	64.7169	89244625
688	chr4	41630850	41632499	+	1650	0	41631667	41632122	41631662	41631894	456	4.68703	41631875	3.74918	41631875	85.753	41631675
689	chr17	26476650	26477499	+	850	0	26477022	26476902	26476792	26476962	-119	4.68672	26476775	3.79366	26476775	65.8784	26476875
690	chr9	61279100	61279799	+	700	0	61279157	61279297	61279222	61279227	141	4.68552	61279325	3.73942	61279325	90.4788	61279225
691	chr13	31815450	31816899	+	1450	0	31815962	31816387	31816377	31816174	426	4.68498	31816175	3.7007	31816175	96.4771	31816375
692	chr2	127907700	127909249	+	1550	0	127908222	127908617	127908542	127908419	396	4.68461	127908575	3.69422	127908575	90.4056	127908575
693	chr13	99538200	99538449	+	250	0	99538312	99538447	99538392	99538379	136	4.68453	99538275	3.68794	99538275	59.5994	99538375
694	chr12	12580600	12582349	+	1750	0	12581022	12582227	12581037	12581624	1206	4.68438	12581125	3.94512	12581025	95.4225	12581075
695	chr4	106848150	106849099	+	950	0	106848452	106848667	106848527	106848559	216	4.68216	106848625	3.88277	106848625	100	106848475
696	chr18	60651150	60654999	+	3850	0	60653957	60653867	60654032	60653912	-89	4.68169	60651525	3.71501	60651525	100	60651475
697	chr8	10960500	10962049	+	1550	0	10961742	10961802	10961737	10961772	61	4.68089	10960775	3.73335	10960775	100	10961675
698	chr12	112241250	112242199	+	950	0	112241252	112241557	112241467	112241404	306	4.68078	112241725	3.7407	112241725	68.6819	112241475
699	chr17	5056700	5057049	+	350	0	5056857	5056932	5056932	5056894	76	4.68076	5056875	3.69805	5056875	73.0238	5056875
700	chr5	122109100	122109499	+	400	0	122109127	122109412	122109202	122109269	286	4.68049	122109375	3.68829	122109375	81.6034	122109225
701	chr6	125097850	125099049	+	1200	0	125098657	125098857	125098777	125098757	201	4.68043	125098775	3.69198	125098775	100	125098625
702	chr4	117316450	117318199	+	1750	0	117317902	117317127	117317982	117317514	-774	4.68017	117317175	3.78542	117317175	100	117317075
703	chr2	74738850	74740799	+	1950	0	74739292	74739467	74739367	74739379	176	4.68	74739525	3.7269	74739525	97.8623	74739375
704	chr2	154927650	154928149	+	500	0	154927652	154928012	154927752	154927832	361	4.67926	154927975	3.69839	154927975	59.6153	154927775
705	chr17	46751050	46751349	+	300	0	46751117	46751292	46751197	46751204	176	4.67919	46751225	3.72437	46751225	47.9806	46751175
706	chr8	10760950	10761399	+	450	0	10761057	10761207	10761132	10761132	151	4.67854	10761175	3.69303	10761175	77.3204	10761125
707	chr12	108213150	108214249	+	1100	0	108213857	108214022	108213932	108213939	166	4.67847	108214025	3.70844	108213975	96.5125	108213925
708	chr11	117267850	117270599	+	2750	0	117268052	117268647	117268577	117268349	596	4.67827	117268275	3.68365	117268275	100	117268225
709	chr14	65091900	65092349	+	450	0	65092162	65092247	65092172	65092204	86	4.67771	65092125	3.76891	65092125	54.9129	65092025
710	chr11	118364650	118366499	+	1850	0	118365847	118365242	118365922	118365544	-604	4.67712	118366225	3.87123	118366225	73.0424	118365175
711	chr14	25767150	25768149	+	1000	0	25767332	25767462	25767407	25767397	131	4.67677	25767625	3.75434	25767625	95.9296	25767425
712	chr16	42335950	42336899	+	950	0	42336697	42336892	42336822	42336794	196	4.67675	42336225	3.78753	42336225	51.0797	42336775
713	chr19	56224950	56225399	+	450	0	56225217	56224967	56225317	56225092	-249	4.67654	56225125	3.72795	56225125	57.6808	56225225
714	chr17	34588800	34591899	+	3100	0	34589827	34591507	34589902	34590667	1681	4.6764	34590025	3.68262	34590025	100	34589925
715	chr11	117325200	117327149	+	1950	0	117326177	117325887	117325817	117326032	-289	4.67591	117325775	3.69421	117325775	98.1257	117325825
716	chr5	64810600	64812699	+	2100	0	64811637	64812627	64811717	64812132	991	4.67588	64812075	3.83823	64812075	96.7378	64811675
717	chr19	5846800	5849549	+	2750	0	5849112	5848837	5848757	5848974	-274	4.67489	5848325	3.68604	5848325	100	5847525
718	chr2	167543650	167544599	+	950	0	167544437	167544342	167543897	167544389	-94	4.67463	167544375	3.71113	167544375	100	167543875
719	chr8	122579200	122579599	+	400	0	122579362	122579467	122579462	122579414	106	4.67452	122579425	3.72412	122579425	58.9158	122579425
720	chr4	45464550	45465449	+	900	0	45464722	45464822	45464822	45464772	101	4.6743	45465225	3.77991	45465225	73.487	45464825
721	chr18	75263900	75265049	+	1150	0	75264592	75264717	75264627	75264654	126	4.67335	75264575	3.71478	75264575	100	75264575
722	chr11	100713300	100714099	+	800	0	100713762	100713947	100713857	100713854	186	4.67328	100713575	3.71057	100713575	73.7603	100713925
723	chr1	74053900	74054749	+	850	0	74054092	74054207	74054122	74054149	116	4.67295	74054125	3.8265	74054175	98.2798	74054125
724	chr4	139258350	139259399	+	1050	0	139258902	139258997	139258982	139258949	96	4.67256	139258975	3.92711	139259025	90.9944	139258975
725	chr11	50228450	50228999	+	550	0	50228682	50228957	50228882	50228819	276	4.67234	50228775	3.71024	50228775	100	50228775
726	chr11	115266900	115267449	+	550	0	115267182	115267287	115267202	115267234	106	4.6722	115267275	3.74185	115267225	45.2379	115267275
727	chr4	45489100	45491149	+	2050	0	45490082	45489832	45490432	45489957	-249	4.6719	45490225	3.80684	45490175	100	45490175
728	chr4	114712150	114712949	+	800	0	114712422	114712487	114712437	114712454	66	4.67113	114712375	3.79648	114712375	51.7613	114712425
729	chr12	104865150	104865649	+	500	0	104865352	104865567	104865492	104865459	216	4.67085	104865325	3.71654	104865325	57.6244	104865475
730	chr15	77882800	77883899	+	1100	0	77883417	77883592	77883517	77883504	176	4.66973	77883475	3.75038	77883475	86.244	77883525
731	chr17	45936600	45937399	+	800	0	45937007	45936862	45936787	45936934	-144	4.66954	45937275	3.68709	45937225	53.4765	45936925
732	chr4	65278500	65278849	+	350	0	65278507	65278777	65278582	65278642	271	4.66916	65278675	3.71957	65278675	49.27	65278675
733	chr13	44794950	44795299	+	350	0	44794952	44795252	44795237	44795102	301	4.66897	44795125	3.72872	44795125	46.7884	44795125
734	chr18	75384950	75385599	+	650	0	75385422	75385052	75385322	75385237	-369	4.66882	75385125	3.71873	75385125	89.3589	75385175
735	chr13	56167750	56168949	+	1200	0	56168097	56168642	56168652	56168369	546	4.6687	56168125	3.68562	56168125	83.0749	56168525
736	chr3	137952600	137953099	+	500	0	137952822	137953097	137952897	137952959	276	4.66851	137952725	3.69202	137952725	53.3019	137952875
737	chr5	117356300	117356999	+	700	0	117356462	117356487	117356522	117356474	26	4.66846	117356475	3.69426	117356475	42.8798	117356475
738	chr1	133367350	133368349	+	1000	0	133367752	133367832	133367742	133367792	81	4.66735	133367875	3.78941	133367875	100	133367775
739	chr9	114689900	114690349	+	450	0	114690297	114690277	114690202	114690287	-19	4.6672	114690125	3.70768	114690125	49.6289	114690225
740	chr5	117780800	117781599	+	800	0	117781012	117781072	117780972	117781042	61	4.66711	117781075	3.70514	117781075	94.4809	117781025
741	chr5	111011650	111012799	+	1150	0	111012592	111012522	111012642	111012557	-69	4.66596	111012625	3.73826	111012625	80.3325	111012625
742	chr9	29833550	29834249	+	700	0	29833762	29833902	29833847	29833832	141	4.66596	29833875	3.69555	29833875	99.556	29833825
743	chr11	6405350	6406949	+	1600	0	6406342	6406722	6406427	6406532	381	4.66586	6406425	3.70843	6406425	100	6406375
744	chr1	168383350	168386499	+	3150	0	168384222	168384992	168384292	168384607	771	4.6653	168384325	3.76754	168384375	100	168384225
745	chr13	56752900	56753699	+	800	0	56752937	56753167	56753022	56753052	231	4.66473	56753475	3.74794	56753475	51.2496	56753525
746	chr19	7164400	7165499	+	1100	0	7165302	7165052	7164977	7165177	-249	4.6632	7164575	3.91675	7164575	66.7067	7164975
747	chr2	151605850	151606349	+	500	0	151606037	151606152	151606097	151606094	116	4.6629	151606175	3.68225	151606175	73.4194	151606075
748	chr14	40952850	40953799	+	950	0	40953247	40953387	40953317	40953317	141	4.6628	40953325	3.84088	40953325	89.7638	40953325
749	chr16	17798850	17799899	+	1050	0	17799112	17799382	17799187	17799247	271	4.66279	17799275	3.71036	17799275	91.6571	17799175
750	chr11	75537950	75538399	+	450	0	75538042	75538152	75538077	75538097	111	4.66265	75538225	3.73685	75538225	92.3826	75538075
751	chr9	67077650	67078649	+	1000	0	67077732	67077837	67077807	67077784	106	4.66247	67077825	3.67005	67077825	71.2141	67077825
752	chr1	75343850	75345499	+	1650	0	75344447	75345017	75344887	75344732	571	4.66235	75344925	3.6839	75344925	100	75344475
753	chr19	44825500	44826049	+	550	0	44825827	44825962	44825877	44825894	136	4.66146	44825875	3.69126	44825875	70.5534	44825875
754	chr9	45134450	45138399	+	3950	0	45136317	45137702	45136392	45137009	1386	4.66105	45135525	3.68708	45135525	95.7919	45136375
755	chr9	106420500	106421349	+	850	0	106420737	106420862	106420797	106420799	126	4.66068	106420775	3.74695	106420775	100	106420725
756	chr2	93522200	93522549	+	350	0	93522372	93522392	93522392	93522382	21	4.66045	93522425	3.67578	93522425	70.1951	93522375
757	chr2	172866650	172867699	+	1050	0	172867497	172867617	172867542	172867557	121	4.66011	172867525	3.69604	172867525	100	172867475
758	chr2	30691900	30693149	+	1250	0	30692302	30692407	30692377	30692354	106	4.66008	30692325	3.68605	30692325	100	30692275
759	chr13	53236350	53237749	+	1400	0	53237132	53236897	53236762	53237014	-234	4.6599	53237525	3.71606	53237525	98.5408	53236675
760	chr1	118910800	118911799	+	1000	0	118911267	118911642	118911362	118911454	376	4.65979	118911375	3.67956	118911375	69.3858	118911325
761	chr4	105168350	105169099	+	750	0	105168677	105168557	105168482	105168617	-119	4.65947	105168625	3.69353	105168625	64.1072	105168525
762	chr5	135073300	135074049	+	750	0	135073692	135073727	135073732	135073709	36	4.65944	135073675	3.66976	135073675	100	135073625
763	chr2	165886400	165889499	+	3100	0	165886567	165887747	165886677	165887157	1181	4.6591	165886675	3.69706	165886675	100	165886575
764	chr4	155234950	155236249	+	1300	0	155235762	155235792	155235742	155235777	31	4.6587	155235725	4.09943	155235725	100	155235575
765	chr11	118200950	118203249	+	2300	0	118201532	118202447	118201597	118201989	916	4.65867	118201725	3.68303	118201725	100	118201575
766	chr5	151019400	151019699	+	300	0	151019582	151019682	151019607	151019632	101	4.65864	151019525	3.72717	151019525	33.3108	151019625
767	chr17	25794650	25795899	+	1250	0	25795327	25795452	25795402	25795389	126	4.65862	25795475	3.67145	25795475	100	25795375
768	chr16	29735400	29736549	+	1150	0	29735517	29735902	29735477	29735709	386	4.65844	29735525	3.72657	29735525	91.5304	29735475
769	chr7	133117050	133118299	+	1250	0	133117512	133117597	133117557	133117554	86	4.65816	133117575	3.66744	133117575	100	133117525
770	chr4	133015700	133017799	+	2100	0	133016222	133016492	133016447	133016357	271	4.65772	133016425	3.67151	133016425	100	133016275
771	chr16	17234750	17235849	+	1100	0	17234927	17235207	17235082	17235067	281	4.6577	17235075	3.73564	17235075	68.2079	17235125
772	chr5	140508400	140508849	+	450	0	140508427	140508652	140508562	140508539	226	4.65751	140508575	3.78474	140508575	83.1736	140508575
773	chr15	102270200	102271499	+	1300	0	102270817	102270852	102270942	102270834	36	4.65743	102271075	3.71659	102271125	77.3993	102270925
774	chr8	122669750	122670199	+	450	0	122670072	122670177	122670152	122670124	106	4.6574	122670075	3.70138	122670075	52.6461	122670125
775	chr9	62857150	62858099	+	950	0	62857442	62857362	62857297	62857402	-79	4.65688	62857325	3.66812	62857325	100	62857325
776	chr10	59965150	59966349	+	1200	0	59965517	59965632	59965557	59965574	116	4.65686	59965775	3.6826	59965775	100	59965575
777	chr17	46594550	46595449	+	900	0	46595072	46595202	46595132	46595137	131	4.65677	46594825	3.72487	46594825	85.323	46594875
778	chr11	51541900	51543099	+	1200	0	51541952	51542272	51542197	51542112	321	4.65588	51542175	3.69341	51542175	92.584	51542125
779	chr11	98745900	98748499	+	2600	0	98747032	98747937	98747062	98747484	906	4.65458	98748275	3.69386	98748275	100	98747075
780	chr7	44310050	44311999	+	1950	0	44311062	44311652	44311182	44311357	591	4.65437	44311325	3.68766	44311325	74.4399	44311225
781	chr8	83973600	83974249	+	650	0	83973687	83974077	83973887	83973882	391	4.65435	83974075	3.67468	83974075	76.5752	83973925
782	chr16	58513700	58514099	+	400	0	58513932	58514092	58514017	58514012	161	4.65428	58513925	3.72416	58513875	56.8799	58513975
783	chr11	35370000	35370649	+	650	0	35370077	35370192	35370127	35370134	116	4.65373	35370225	3.73444	35370225	74.4972	35370125
784	chr14	24243600	24243949	+	350	0	24243692	24243807	24243747	24243749	116	4.65355	24243775	3.73562	24243775	39.4901	24243775
785	chr4	84634600	84635399	+	800	0	84634867	84634947	84634957	84634907	81	4.65345	84635075	3.97208	84635025	79.4019	84634975
786	chr17	87350200	87351949	+	1750	0	87351677	87351192	87351162	87351434	-484	4.65333	87351675	3.67484	87351675	100	87351125
787	chr10	81319100	81319949	+	850	0	81319527	81319607	81319582	81319567	81	4.65331	81319475	3.73745	81319475	97.1354	81319575
788	chr16	4595600	4599749	+	4150	0	4598767	4596687	4598842	4597727	-2079	4.65267	4598275	3.73905	4598275	100	4596575
789	chr2	32173850	32174799	+	950	0	32174342	32174512	32174447	32174427	171	4.6524	32174375	3.68482	32174375	100	32174425
790	chr5	137629900	137631599	+	1700	0	137630092	137630457	137630382	137630274	366	4.65143	137630875	3.69326	137630875	94.1599	137630925
791	chr12	75834250	75834699	+	450	0	75834382	75834462	75834457	75834422	81	4.65134	75834375	3.8114	75834375	52.046	75834475
792	chr8	70489400	70493699	+	4300	0	70491187	70492077	70489857	70491632	891	4.65038	70491175	3.66067	70491175	100	70489875
793	chr11	105312250	105314549	+	2300	0	105312752	105314177	105314102	105313464	1426	4.65028	105314175	3.68188	105314175	100	105314075
794	chr11	76429400	76430749	+	1350	0	76430427	76430592	76430517	76430509	166	4.65021	76430425	3.82148	76430425	100	76429575
795	chr5	99247650	99248199	+	550	0	99247692	99247882	99247822	99247787	191	4.65006	99247825	3.72449	99247825	74.2568	99247825
796	chr4	149990050	149991499	+	1450	0	149990762	149991027	149990837	149990894	266	4.64986	149990275	3.69166	149990275	96.5489	149990875
797	chr17	83901950	83903099	+	1150	0	83902137	83902387	83902302	83902262	251	4.64968	83902325	3.72459	83902325	78.3467	83902225
798	chr7	137265800	137267249	+	1450	0	137266777	137266172	137266917	137266474	-604	4.64941	137266525	3.71098	137266525	99.2088	137266825
799	chr7	65780300	65780599	+	300	0	65780507	65780557	65780482	65780532	51	4.64918	65780425	3.72063	65780425	34.2601	65780475
800	chr3	52044150	52046149	+	2000	0	52044557	52045577	52045512	52045067	1021	4.64917	52045725	3.67181	52045725	81.5541	52045375
801	chr19	5066900	5067799	+	900	0	5067177	5067617	5067227	5067397	441	4.64905	5067525	3.66596	5067525	100	5067125
802	chr9	13645550	13645949	+	400	0	13645782	13645852	13645787	13645817	71	4.64885	13645825	3.72969	13645825	46.3576	13645875
803	chr5	111798900	111800199	+	1300	0	111799552	111799692	111799612	111799622	141	4.64853	111799675	3.67636	111799675	100	111799575
804	chr9	119110600	119110999	+	400	0	119110787	119110812	119110847	119110799	26	4.64849	119110825	3.87727	119110825	59.0745	119110875
805	chr8	87834750	87835799	+	1050	0	87835197	87835562	87835627	87835379	366	4.6471	87835575	3.68704	87835575	100	87835275
806	chr2	160525900	160526399	+	500	0	160526097	160526302	160526167	160526199	206	4.64697	160526225	3.67065	160526225	47.7177	160526175
807	chr10	87857250	87858749	+	1500	0	87858487	87857992	87857912	87858239	-494	4.64692	87857525	3.65753	87857525	71.8519	87857575
808	chr2	168580250	168580649	+	400	0	168580412	168580627	168580542	168580519	216	4.64679	168580475	3.82418	168580475	91.9879	168580475
809	chr10	77164000	77165049	+	1050	0	77164942	77164712	77164587	77164827	-229	4.64663	77164625	3.66634	77164625	72.5582	77164575
810	chr4	155172650	155174899	+	2250	0	155174262	155174577	155173767	155174419	316	4.64651	155174275	3.66276	155174275	100	155173625
811	chr11	98785600	98786999	+	1400	0	98786397	98786102	98786782	98786249	-294	4.64547	98786525	3.66193	98786525	86.3822	98786775
812	chr12	86802450	86803499	+	1050	0	86802767	86802932	86802842	86802849	166	4.64521	86803275	3.68722	86803275	100	86802775
813	chr1	166282000	166282799	+	800	0	166282592	166282502	166282747	166282547	-89	4.64466	166282575	3.65485	166282575	67.1114	166282675
814	chr11	97811500	97813399	+	1900	0	97812737	97812732	97812837	97812734	-4	4.64465	97812925	3.65995	97812925	100	97812425
815	chr4	130796950	130798699	+	1750	0	130798057	130797552	130797837	130797804	-504	4.64456	130798075	3.67072	130798025	100	130797475
816	chr6	125099300	125099949	+	650	0	125099672	125099752	125099747	125099712	81	4.64451	125099725	3.71036	125099725	78.5401	125099675
817	chr5	4535450	4536199	+	750	0	4535617	4535742	4536062	4535679	126	4.64417	4535675	3.69186	4535675	56.8592	4536075
818	chr2	33649050	33650099	+	1050	0	33649452	33649377	33649242	33649414	-74	4.64288	33649225	3.87661	33649225	100	33649275
819	chr8	121083850	121084549	+	700	0	121084022	121084272	121084097	121084147	251	4.64276	121084175	3.66619	121084175	58.9909	121084225
820	chr14	21679200	21679799	+	600	0	21679497	21679672	21679597	21679584	176	4.64237	21679575	3.70556	21679575	75.1303	21679575
821	chr7	109195700	109196399	+	700	0	109196162	109196302	109196237	109196232	141	4.64235	109196225	4.04217	109196175	98.6431	109196225
822	chr11	8659600	8660349	+	750	0	8660232	8660152	8660092	8660192	-79	4.64181	8659725	3.71824	8659725	75.9354	8660125
823	chr14	24825950	24826349	+	400	0	24826017	24826152	24826077	24826084	136	4.64161	24826125	3.67443	24826125	60.8453	24826075
824	chr17	28144000	28145199	+	1200	0	28144347	28144512	28144432	28144429	166	4.64134	28144475	3.70743	28144525	100	28144425
825	chr4	133292750	133294249	+	1500	0	133293117	133293782	133293132	133293449	666	4.64121	133293175	3.7463	133293225	100	133293125
826	chr2	27739700	27740999	+	1300	0	27739887	27740327	27740247	27740107	441	4.64112	27739975	3.66083	27739975	100	27739925
827	chr4	136104650	136105499	+	850	0	136104992	136105007	136104927	136104999	16	4.64092	136105125	3.66093	136105125	100	136104825
828	chr1	61139550	61143549	+	4000	0	61140422	61141217	61143372	61140819	796	4.64085	61142925	3.82557	61142925	70.4021	61143425
829	chr18	53597500	53597899	+	400	0	53597602	53597597	53597522	53597599	-4	4.64059	53597725	3.69276	53597725	41.5474	53597525
830	chr9	102724850	102726249	+	1400	0	102725762	102725842	102725857	102725802	81	4.64001	102725775	3.71756	102725775	100	102725325
831	chr11	102630150	102631949	+	1800	0	102631342	102631017	102631422	102631179	-324	4.63927	102630775	3.8184	102630775	90.4587	102630975
832	chr2	35619050	35621849	+	2800	0	35620097	35619557	35619477	35619827	-539	4.63916	35619925	3.70865	35619925	100	35619425
833	chr3	84270200	84271549	+	1350	0	84270602	84270852	84270682	84270727	251	4.63897	84270425	3.77266	84270425	84.3993	84270675
834	chr2	85060550	85061349	+	800	0	85061012	85061182	85061107	85061097	171	4.63897	85061125	3.78416	85061125	69.3403	85061175
835	chr18	75376600	75379749	+	3150	0	75378777	75378967	75378852	75378872	191	4.63885	75376825	3.82976	75376825	100	75377825
836	chr15	77907300	77907799	+	500	0	77907382	77907572	77907507	77907477	191	4.63879	77907675	3.6678	77907675	76.6575	77907525
837	chr7	96551750	96552849	+	1100	0	96551897	96551967	96551972	96551932	71	4.63874	96551925	3.65019	96551925	98.1905	96551975
838	chr1	89750200	89751199	+	1000	0	89751037	89751127	89751027	89751082	91	4.63865	89751025	3.70193	89751025	67.9166	89751075
839	chr10	127515450	127517399	+	1950	0	127516517	127517047	127516587	127516782	531	4.63861	127516775	3.75222	127516775	100	127515675
840	chr7	142542500	142543549	+	1050	0	142542777	142542862	142542857	142542819	86	4.63816	142542825	3.79247	142543325	100	142542725
841	chr7	35848100	35848599	+	500	0	35848302	35848282	35848227	35848292	-19	4.63742	35848425	3.80541	35848425	36.9747	35848225
842	chr5	114571000	114571749	+	750	0	114571452	114571462	114571467	114571457	11	4.63716	114571575	3.65344	114571575	53.4761	114571475
843	chr12	13198250	13198749	+	500	0	13198412	13198377	13198392	13198394	-34	4.63607	13198575	3.64661	13198575	69.6304	13198425
844	chr16	91270100	91270849	+	750	0	91270387	91270467	91270402	91270427	81	4.63592	91270375	3.71496	91270375	59.7903	91270425
845	chr8	120497250	120498949	+	1700	0	120498402	120497762	120498492	120498082	-639	4.63582	120497825	3.75575	120497825	100	120497675
846	chr11	102465750	102465999	+	250	0	102465857	102465807	102465872	102465832	-49	4.63576	102465875	3.78506	102465875	32.1476	102465875
847	chr5	132369150	132369799	+	650	0	132369377	132369627	132369447	132369502	251	4.63574	132369625	3.68962	132369625	84.2744	132369575
848	chr18	35933100	35933749	+	650	0	35933132	35933537	35933467	35933334	406	4.63571	35933275	3.76277	35933275	58.4045	35933325
849	chr4	149415500	149416999	+	1500	0	149416557	149416627	149416632	149416592	71	4.6357	149416725	3.65485	149416725	100	149416575
850	chr18	60962750	60964249	+	1500	0	60963582	60963772	60963692	60963677	191	4.63563	60963025	3.66168	60963025	100	60963625
851	chr4	106984500	106987199	+	2700	0	106985977	106987147	106986042	106986562	1171	4.63536	106986375	3.78243	106986375	99.4484	106985975
852	chr11	102217900	102219999	+	2100	0	102218497	102218782	102218572	102218639	286	4.63533	102219375	3.66031	102219375	100	102218425
853	chr2	166679000	166679349	+	350	0	166679222	166679282	166679207	166679252	61	4.63528	166679125	3.66972	166679125	64.9383	166679275
854	chr4	107609200	107610199	+	1000	0	107609617	107609787	107609692	107609702	171	4.63524	107609775	3.7103	107609775	72.7922	107609725
855	chr11	54059750	54060849	+	1100	0	54060137	54060197	54060237	54060167	61	4.6352	54060275	3.6629	54060275	100	54060225
856	chr5	65415900	65416249	+	350	0	65416022	65416097	65416097	65416059	76	4.63445	65416075	3.69534	65416075	49.5993	65416075
857	chr15	94004450	94005599	+	1150	0	94005097	94004957	94005172	94005027	-139	4.63442	94005075	3.92969	94005075	61.7229	94005125
858	chr9	73063650	73063999	+	350	0	73063732	73063912	73063832	73063822	181	4.63405	73063825	3.64963	73063825	72.4657	73063825
859	chr2	33919650	33920149	+	500	0	33919942	33920057	33919982	33919999	116	4.6339	33919825	3.68547	33919825	71.1568	33919975
860	chr17	62853100	62853649	+	550	0	62853297	62853452	62853372	62853374	156	4.63378	62853475	3.6454	62853475	100	62853375
861	chr13	99239100	99240149	+	1050	0	99239247	99239322	99239322	99239284	76	4.63327	99239325	3.64868	99239325	100	99239225
862	chr11	75147700	75149099	+	1400	0	75148422	75148537	75148472	75148479	116	4.63292	75148475	3.70356	75148475	100	75148125
863	chr4	133439500	133441049	+	1550	0	133439832	133439902	133439887	133439867	71	4.63255	133440525	3.81801	133440575	100	133439825
864	chr11	94927750	94928949	+	1200	0	94927957	94928872	94927987	94928414	916	4.63253	94928725	3.67976	94928725	97.5378	94928775
865	chr2	132445000	132445349	+	350	0	132445032	132445197	132445122	132445114	166	4.63178	132445175	3.77708	132445175	41.2559	132445125
866	chr9	65162800	65163199	+	400	0	65162922	65163027	65162977	65162974	106	4.63109	65162975	3.74605	65162975	60.5285	65162975
867	chr1	74029750	74032049	+	2300	0	74030942	74031072	74030992	74031007	131	4.63107	74030925	3.66878	74030525	100	74030875
868	chr16	94250250	94250799	+	550	0	94250512	94250697	94250622	94250604	186	4.63089	94250475	3.68935	94250475	67.6018	94250625
869	chr13	100552150	100552699	+	550	0	100552332	100552627	100552537	100552479	296	4.63088	100552475	3.67374	100552475	44.1478	100552575
870	chr10	76963650	76963999	+	350	0	76963742	76963837	76963832	76963789	96	4.63072	76963775	3.66957	76963775	77.9947	76963825
871	chr12	8802900	8803299	+	400	0	8802977	8803087	8803052	8803032	111	4.63062	8803075	3.68377	8803075	94.6521	8803075
872	chr4	155215300	155216899	+	1600	0	155215867	155216137	155216267	155216002	271	4.63009	155216475	3.65638	155216475	82.4289	155215775
873	chr11	119145300	119146399	+	1100	0	119145312	119145632	119145392	119145472	321	4.62984	119145525	3.65037	119145525	88.3492	119145425
874	chr17	28247100	28248049	+	950	0	28247462	28247587	28247512	28247524	126	4.62915	28247575	3.6933	28247575	100	28247425
875	chr4	106847000	106847799	+	800	0	106847182	106847297	106847252	106847239	116	4.62895	106847275	3.70033	106847275	100	106847175
876	chr12	109840200	109840649	+	450	0	109840447	109840567	109840502	109840507	121	4.62889	109840425	3.67077	109840425	70.5155	109840525
877	chr6	29434050	29436949	+	2900	0	29435302	29436677	29435462	29435989	1376	4.62822	29436125	3.64045	29436125	100	29435225
878	chr9	106337500	106341549	+	4050	0	106340937	106339097	106339992	106340017	-1839	4.62788	106338875	3.79711	106338925	100	106338875
879	chr5	113503850	113504549	+	700	0	113504117	113504267	113504192	113504192	151	4.62771	113504425	3.6553	113504425	65.755	113504225
880	chr11	119038750	119040149	+	1400	0	119039102	119039467	119039207	119039284	366	4.6276	119039675	3.71516	119039675	93.5726	119039175
881	chr17	27199700	27201599	+	1900	0	27201267	27201407	27201332	27201337	141	4.62753	27200925	3.67603	27200925	100	27201275
882	chr11	88524050	88525499	+	1450	0	88524912	88525037	88524952	88524974	126	4.62745	88525125	3.65842	88525125	100	88524825
883	chr16	94302400	94303249	+	850	0	94303132	94302647	94302572	94302889	-484	4.62715	94302575	3.92986	94302575	71.3336	94302575
884	chr11	118348450	118349699	+	1250	0	118349202	118349377	118349282	118349289	176	4.62692	118348975	3.96574	118349025	100	118349175
885	chr8	117469750	117470299	+	550	0	117469932	117470022	117469982	117469977	91	4.62653	117469925	3.64154	117469925	71.4766	117469925
886	chr1	167270450	167271499	+	1050	0	167270897	167270632	167270507	167270764	-264	4.62652	167270875	3.64021	167270875	68.2493	167270575
887	chr2	33801300	33801899	+	600	0	33801492	33801672	33801597	33801582	181	4.62641	33801725	3.69042	33801725	82.5859	33801575
888	chr6	127978450	127979199	+	750	0	127978972	127979072	127979047	127979022	101	4.62632	127979025	3.64957	127979025	71.1207	127979025
889	chr2	59674950	59676949	+	2000	0	59675762	59675787	59675797	59675774	26	4.62608	59676275	3.67922	59676275	100	59675725
890	chr5	125112750	125113399	+	650	0	125113282	125113317	125113277	125113299	36	4.62568	125113125	3.65187	125113175	72.8835	125113225
891	chr2	93277450	93278699	+	1250	0	93277767	93277872	93277797	93277819	106	4.6254	93277825	3.74414	93277825	100	93277825
892	chr7	123571800	123572199	+	400	0	123572027	123572057	123572117	123572042	31	4.62472	123571925	3.65405	123571925	37.7315	123572025
893	chr2	37970200	37970749	+	550	0	37970317	37970367	37970392	37970342	51	4.6244	37970525	3.68322	37970525	49.1574	37970425
894	chr14	21891250	21891799	+	550	0	21891312	21891682	21891372	21891497	371	4.62326	21891475	3.64125	21891475	100	21891375
895	chr8	126662150	126663249	+	1100	0	126662352	126663022	126662947	126662687	671	4.62321	126662925	3.7038	126662925	85.9468	126662925
896	chr5	149428250	149429349	+	1100	0	149428992	149429162	149429092	149429077	171	4.62315	149428825	3.66381	149428825	75.923	149429075
897	chr14	70545850	70546649	+	800	0	70546122	70546387	70546237	70546254	266	4.62312	70546225	3.65296	70546225	100	70546175
898	chr11	114684200	114685349	+	1150	0	114685057	114685212	114685137	114685134	156	4.62285	114684675	3.73136	114684625	76.4161	114685125
899	chr18	76615350	76615799	+	450	0	76615537	76615757	76615667	76615647	221	4.62274	76615625	3.67043	76615625	79.9321	76615625
900	chr3	89185000	89185899	+	900	0	89185512	89185627	89185597	89185569	116	4.6226	89185175	4.07224	89185225	98.4055	89185625
901	chr8	119627650	119628399	+	750	0	119627977	119628142	119628067	119628059	166	4.62237	119628175	3.70509	119628175	85.3407	119628125
902	chr6	30545000	30545399	+	400	0	30545297	30545262	30545372	30545279	-34	4.62197	30545225	3.69428	30545225	81.4203	30545275
903	chr2	36078100	36078549	+	450	0	36078317	36078307	36078367	36078312	-9	4.62131	36078325	3.67411	36078325	44.5283	36078375
904	chr7	45814950	45815599	+	650	0	45815417	45815522	45815472	45815469	106	4.62126	45815075	3.65465	45815075	42.7988	45815375
905	chr5	123390750	123391049	+	300	0	123390822	123390972	123390897	123390897	151	4.6212	123390875	3.6393	123390875	54.041	123390775
906	chr8	120513050	120514899	+	1850	0	120514177	120513767	120514217	120513972	-409	4.62111	120514175	3.77134	120514175	100	120513675
907	chr17	26953200	26954299	+	1100	0	26953322	26953292	26953352	26953307	-29	4.62111	26954175	3.64587	26953875	100	26953375
908	chr7	25781400	25782449	+	1050	0	25781667	25781932	25781752	25781799	266	4.62091	25781875	3.68214	25781875	100	25781725
909	chr2	32363850	32364349	+	500	0	32364257	32363942	32363867	32364099	-314	4.62075	32364175	3.65209	32364175	50.6711	32363925
910	chr12	12791300	12792049	+	750	0	12791707	12792042	12791992	12791874	336	4.62055	12791825	3.67619	12791825	68.6752	12791975
911	chr12	85175050	85177049	+	2000	0	85176177	85176562	85176482	85176369	386	4.62037	85175175	3.69781	85175175	100	85176375
912	chr7	99539200	99540349	+	1150	0	99539652	99539602	99539767	99539627	-49	4.62032	99539575	3.66947	99539575	90.658	99539775
913	chr4	45435950	45437899	+	1950	0	45437487	45437522	45437542	45437504	36	4.6199	45436425	3.69183	45437275	93.5726	45437575
914	chr14	59759000	59759849	+	850	0	59759372	59759342	59759467	59759357	-29	4.61987	59759425	3.70414	59759425	81.818	59759425
915	chr7	100924500	100925449	+	950	0	100925167	100925277	100925202	100925222	111	4.61975	100925275	3.75874	100925275	100	100925125
916	chr9	41949200	41950499	+	1300	0	41949952	41950187	41950097	41950069	236	4.61963	41950125	3.9514	41950125	90.4718	41950125
917	chr17	45967900	45968249	+	350	0	45968032	45968182	45968107	45968107	151	4.61939	45968075	3.65343	45968075	58.9473	45968125
918	chr6	84009950	84010649	+	700	0	84010177	84010587	84010267	84010382	411	4.61921	84010475	3.66399	84010475	79.8351	84010375
919	chr6	29718000	29718599	+	600	0	29718052	29718207	29718127	29718129	156	4.61902	29718175	3.69888	29718175	86.2741	29718125
920	chr2	93482000	93483149	+	1150	0	93482122	93482437	93482187	93482279	316	4.61873	93482375	3.65204	93482375	81.8902	93482225
921	chr1	162021450	162022149	+	700	0	162021707	162021712	162021727	162021709	6	4.61853	162021725	3.72632	162021725	77.1763	162021725
922	chr17	87976000	87976649	+	650	0	87976262	87976292	87976217	87976277	31	4.61833	87976125	3.68493	87976125	52.2594	87976175
923	chr6	99483400	99484699	+	1300	0	99484122	99484477	99484402	99484299	356	4.61829	99484275	3.70459	99484325	71.4924	99484425
924	chr11	35388800	35391049	+	2250	0	35389372	35389652	35389447	35389512	281	4.6179	35389775	3.67413	35389775	72.4884	35389425
925	chr13	43930950	43931599	+	650	0	43931077	43931297	43931222	43931187	221	4.61618	43931225	3.65367	43931225	88.308	43931375
926	chr11	85676300	85676999	+	700	0	85676372	85676922	85676857	85676647	551	4.61592	85676875	3.6838	85676875	84.1246	85676875
927	chr17	31777050	31777299	+	250	0	31777112	31777197	31777122	31777154	86	4.61588	31777175	3.67428	31777175	41.1097	31777125
928	chr1	38497350	38498399	+	1050	0	38497817	38497992	38497822	38497904	176	4.6157	38497825	3.64111	38497825	100	38497825
929	chr2	168553100	168554249	+	1150	0	168553342	168553502	168553417	168553422	161	4.61564	168553425	3.63417	168553425	100	168553425
930	chr10	81495200	81495799	+	600	0	81495292	81495457	81495367	81495374	166	4.61553	81495425	3.63518	81495425	100	81495325
931	chr12	81009350	81010099	+	750	0	81009937	81010037	81010002	81009987	101	4.61535	81009925	3.63812	81009925	81.9687	81009975
932	chr12	79879350	79881249	+	1900	0	79879627	79879782	79879707	79879704	156	4.61529	79879625	3.63677	79879625	97.1399	79879675
933	chr2	32329100	32329749	+	650	0	32329207	32329472	32329282	32329339	266	4.61509	32329525	3.6466	32329525	100	32329375
934	chr3	31208200	31209649	+	1450	0	31209312	31208747	31209392	31209029	-564	4.61456	31208725	3.70546	31208725	71.9882	31209425
935	chr1	54908950	54910749	+	1800	0	54909152	54909257	54909187	54909204	106	4.61358	54910125	3.75264	54910125	74.1007	54909375
936	chr6	99009800	99010299	+	500	0	99010052	99009977	99010132	99010014	-74	4.61333	99010125	3.63134	99010125	68.4479	99010125
937	chr7	143300200	143300649	+	450	0	143300302	143300592	143300377	143300447	291	4.61297	143300425	3.63842	143300425	73.0131	143300425
938	chr15	84313550	84314899	+	1350	0	84314217	84314152	84314057	84314184	-64	4.61289	84313875	3.67989	84313875	79.4691	84314125
939	chr9	107231250	107231699	+	450	0	107231337	107231482	107231407	107231409	146	4.61289	107231375	3.69194	107231375	58.7438	107231375
940	chr4	148083750	148084599	+	850	0	148084252	148084397	148084327	148084324	146	4.61265	148084225	3.71649	148084225	82.4644	148084325
941	chr2	30795700	30797249	+	1550	0	30796097	30796217	30796142	30796157	121	4.61265	30796225	3.65082	30796225	100	30796075
942	chr8	120373650	120375449	+	1800	0	120374112	120374437	120374287	120374274	326	4.61253	120374175	3.63729	120374175	100	120374075
943	chr1	118858350	118858899	+	550	0	118858367	118858672	118858537	118858519	306	4.61226	118858625	3.71722	118858625	35.0299	118858575
944	chr4	125959500	125959849	+	350	0	125959727	125959722	125959627	125959724	-4	4.61217	125959675	3.71092	125959675	43.9265	125959675
945	chr2	32315350	32317349	+	2000	0	32315807	32315997	32315887	32315902	191	4.61195	32315775	3.64793	32315775	100	32315825
946	chr4	154470450	154472299	+	1850	0	154471617	154471782	154471707	154471699	166	4.6114	154471675	3.69209	154471675	100	154471625
947	chr8	108593000	108593799	+	800	0	108593087	108593267	108593192	108593177	181	4.61134	108593225	3.91811	108593225	70.8195	108593275
948	chr10	127079250	127080149	+	900	0	127079332	127079437	127079407	127079384	106	4.61133	127079475	3.66715	127079475	74.7958	127079425
949	chr6	38636750	38636999	+	250	0	38636812	38636977	38636902	38636894	166	4.61061	38636875	3.68404	38636875	42.472	38636875
950	chr6	30673650	30674099	+	450	0	30673882	30673997	30673932	30673939	116	4.61007	30673925	3.65426	30673925	59.9216	30673875
951	chr18	37818850	37819699	+	850	0	37819407	37819697	37819592	37819552	291	4.61005	37819325	3.64227	37819325	44.5565	37819025
952	chr6	114873950	114874999	+	1050	0	114874457	114874242	114874167	114874349	-214	4.60996	114874525	3.66486	114874525	84.4545	114874175
953	chr5	127322350	127322899	+	550	0	127322422	127322467	127322502	127322444	46	4.6098	127322525	3.70745	127322525	75.7382	127322525
954	chr8	36527900	36528649	+	750	0	36528137	36528477	36528242	36528307	341	4.6096	36528075	3.64125	36528075	58.414	36528275
955	chr14	70204900	70205699	+	800	0	70205082	70205327	70205252	70205204	246	4.60946	70205225	3.64471	70205225	100	70205225
956	chr16	76540350	76540599	+	250	0	76540417	76540542	76540482	76540479	126	4.6094	76540525	3.62718	76540525	50.3683	76540425
957	chr4	128899700	128900849	+	1150	0	128900407	128900272	128900482	128900339	-134	4.60933	128900375	3.65788	128900275	96.227	128900475
958	chr5	118588750	118589299	+	550	0	118588982	118589072	118589067	118589027	91	4.60898	118589025	3.66452	118589025	73.4053	118589025
959	chr4	118265450	118266199	+	750	0	118265862	118266017	118265937	118265939	156	4.6081	118265925	3.65206	118265875	91.1416	118265925
960	chr2	116971650	116972199	+	550	0	116972057	116971757	116971682	116971907	-299	4.6079	116972025	3.63565	116972025	37.7805	116971675
961	chr7	25279700	25281349	+	1650	0	25280402	25280372	25280472	25280387	-29	4.60776	25280175	3.67964	25280175	100	25280175
962	chr4	154392850	154394549	+	1700	0	154393367	154393727	154393647	154393547	361	4.60769	154393725	3.63488	154393725	100	154393375
963	chr8	122474850	122475349	+	500	0	122474982	122475057	122474982	122475019	76	4.60757	122474975	3.63159	122474975	61.5886	122474975
964	chr4	136248350	136248749	+	400	0	136248437	136248742	136248677	136248589	306	4.607	136248575	3.63793	136248575	51.0222	136248675
965	chr14	25207300	25208849	+	1550	0	25207477	25207757	25207662	25207617	281	4.60699	25208125	3.63789	25208125	87.7875	25207675
966	chr11	57773450	57774399	+	950	0	57774142	57773832	57774217	57773987	-309	4.60692	57773675	3.64166	57773725	80.1152	57774275
967	chr1	36579850	36581299	+	1450	0	36580182	36580147	36580262	36580164	-34	4.60607	36580225	3.63774	36580225	100	36580075
968	chr9	106455800	106457499	+	1700	0	106456347	106457017	106456942	106456682	671	4.60561	106456975	3.64688	106456975	100	106456425
969	chr11	82569150	82569549	+	400	0	82569192	82569477	82569267	82569334	286	4.60552	82569375	3.63695	82569375	44.5703	82569275
970	chr6	72218650	72220399	+	1750	0	72219692	72218987	72219777	72219339	-704	4.60502	72219725	3.63272	72219725	100	72218775
971	chr12	104623700	104624199	+	500	0	104623922	104624052	104623977	104623987	131	4.60474	104624025	3.62351	104624025	83.0965	104623975
972	chr14	24215850	24217649	+	1800	0	24217007	24216202	24217087	24216604	-804	4.60452	24216675	3.62668	24216675	77.7814	24217075
973	chr14	122336750	122337299	+	550	0	122336872	122337232	122337107	122337052	361	4.60428	122337125	3.64908	122337125	67.3837	122337025
974	chr11	35276400	35276899	+	500	0	35276847	35276742	35276667	35276794	-104	4.60412	35276725	3.7042	35276725	62.0747	35276775
975	chr17	28256900	28257849	+	950	0	28256977	28257117	28257052	28257047	141	4.60406	28257525	3.67701	28257525	94.883	28257075
976	chr4	139580300	139581899	+	1600	0	139580662	139581092	139580727	139580877	431	4.60353	139581125	3.68086	139581125	99.6363	139580725
977	chr2	168872650	168873349	+	700	0	168873092	168872962	168873147	168873027	-129	4.60341	168873075	3.64523	168873075	41.4603	168873075
978	chr8	27107150	27108299	+	1150	0	27107682	27108272	27108172	27107977	591	4.60336	27107825	3.67685	27107825	100	27107875
979	chr18	35855100	35856899	+	1800	0	35855507	35856382	35855652	35855944	876	4.60335	35855875	3.69906	35855875	99.5623	35855625
980	chr19	41617800	41618549	+	750	0	41618062	41618487	41618547	41618274	426	4.60324	41618075	3.65765	41618075	71.7889	41618125
981	chr1	35935050	35935449	+	400	0	35935112	35935387	35935212	35935249	276	4.60271	35935275	3.71878	35935225	35.7494	35935175
982	chr15	82911200	82912399	+	1200	0	82911607	82912072	82911982	82911839	466	4.60236	82911525	3.7536	82911525	100	82911675
983	chr11	95594600	95597249	+	2650	0	95596677	95596802	95596752	95596739	126	4.60201	95596675	3.64302	95596675	100	95596525
984	chr3	88143800	88146149	+	2350	0	88145292	88145537	88145442	88145414	246	4.60195	88144175	3.63657	88144175	100	88144075
985	chr4	154707550	154709899	+	2350	0	154709407	154709057	154708992	154709232	-349	4.60188	154709475	3.73933	154709725	100	154708975
986	chr11	75213650	75214449	+	800	0	75214042	75214352	75214042	75214197	311	4.60174	75214275	3.91474	75214275	81.3656	75214125
987	chr7	142559900	142563749	+	3850	0	142563227	142563182	142563352	142563204	-44	4.60167	142561575	3.70251	142561575	100	142560525
988	chr4	98105300	98106799	+	1500	0	98106407	98105942	98105902	98106174	-464	4.60117	98106275	3.7137	98106275	87.5853	98105825
989	chr2	28539000	28539699	+	700	0	28539327	28539492	28539417	28539409	166	4.6011	28539225	3.74254	28539225	89.3404	28539525
990	chr2	30724500	30725649	+	1150	0	30725067	30725172	30725142	30725119	106	4.60097	30725475	3.64015	30725475	87.5518	30725075
991	chr14	48202300	48202599	+	300	0	48202327	48202512	48202437	48202419	186	4.60088	48202425	3.62311	48202425	42.0544	48202425
992	chr11	85713600	85715199	+	1600	0	85713972	85714122	85714047	85714047	151	4.6006	85713975	3.65287	85713975	100	85713975
993	chr1	134193200	134194449	+	1250	0	134193312	134193917	134193842	134193614	606	4.60004	134194075	3.74257	134194075	100	134193425
994	chr8	120296350	120297349	+	1000	0	120296622	120296952	120297127	120296787	331	4.59988	120297025	3.7628	120296575	100	120296675
995	chr14	120806650	120806849	+	200	0	120806652	120806782	120806707	120806717	131	4.5998	120806775	3.62247	120806775	20.7204	120806725
996	chr5	111876850	111877999	+	1150	0	111877367	111877622	111877522	111877494	256	4.59969	111877525	3.62647	111877525	100	111877475
997	chr4	63456700	63457199	+	500	0	63456942	63457012	63456947	63456977	71	4.59968	63456875	3.76742	63456875	67.3594	63457075
998	chr1	179143450	179144849	+	1400	0	179143592	179144407	179144397	179143999	816	4.59958	179144675	3.7284	179144675	73.487	179144325
999	chr10	87864300	87865099	+	800	0	87864432	87864657	87864512	87864544	226	4.59954	87864525	3.76901	87864575	62.8055	87864525
1000	chr11	101259200	101260249	+	1050	0	101259347	101259927	101259847	101259637	581	4.59929	101259725	3.66135	101259725	89.7271	101259825
1001	chr9	71759800	71761199	+	1400	0	71760542	71760307	71760222	71760424	-234	4.59893	71760225	3.65513	71760175	72.4205	71760225
1002	chr15	77904300	77905349	+	1050	0	77904322	77904632	77904517	77904477	311	4.59884	77904725	3.6514	77904725	80.4648	77904675
1003	chr8	115453550	115454149	+	600	0	115453697	115453827	115453732	115453762	131	4.59879	115453975	3.68046	115453975	51.793	115453775
1004	chr10	18370300	18370999	+	700	0	18370537	18370932	18370832	18370734	396	4.5978	18370675	3.68093	18370675	74.2374	18370825
1005	chr11	111536550	111536949	+	400	0	111536582	111536867	111536747	111536724	286	4.59773	111536775	3.64039	111536775	47.5566	111536675
1006	chr1	136228350	136228849	+	500	0	136228637	136228752	136228677	136228694	116	4.59754	136228625	3.62339	136228625	73.2113	136228675
1007	chr10	87812700	87813449	+	750	0	87812942	87813177	87813077	87813059	236	4.59744	87813075	3.63709	87813075	100	87813025
1008	chr13	55510450	55512549	+	2100	0	55511327	55511412	55511392	55511369	86	4.59743	55510975	3.72571	55510975	100	55510925
1009	chr10	121435650	121436199	+	550	0	121435672	121436082	121436057	121435877	411	4.59739	121435975	3.67795	121435975	81.5791	121436025
1010	chr11	95639700	95640099	+	400	0	95639732	95639977	95639887	95639854	246	4.59677	95639925	3.63066	95639925	52.1289	95639875
1011	chr8	120549100	120551349	+	2250	0	120549792	120550552	120549587	120550172	761	4.59597	120551025	3.61881	120551025	100	120549275
1012	chr11	61233850	61234349	+	500	0	61233922	61234337	61234272	61234129	416	4.59566	61234225	3.62613	61234225	30.9947	61234275
1013	chr1	93235250	93235649	+	400	0	93235387	93235497	93235427	93235442	111	4.59511	93235425	3.67071	93235425	57.363	93235425
1014	chr7	24390600	24391049	+	450	0	24390722	24391017	24390812	24390869	296	4.59496	24390725	3.83548	24390775	62.0196	24390825
1015	chr16	38288850	38289149	+	300	0	38288937	38289102	38289047	38289019	166	4.5947	38288975	3.63775	38288975	71.4852	38289025
1016	chr8	120291450	120294449	+	3000	0	120292442	120294247	120292517	120293344	1806	4.59464	120292675	3.70147	120294025	93.9425	120294025
1017	chr5	127319950	127321199	+	1250	0	127320682	127320432	127320362	127320557	-249	4.59417	127321075	3.9345	127321025	96.7391	127320225
1018	chr7	141276300	141277649	+	1350	0	141277037	141277152	141277112	141277094	116	4.59372	141277325	3.64572	141277325	85.8816	141277125
1019	chr13	56288100	56288449	+	350	0	56288272	56288407	56288347	56288339	136	4.59362	56288275	3.85455	56288275	71.5682	56288325
1020	chr18	84410500	84410799	+	300	0	84410512	84410727	84410652	84410619	216	4.59351	84410675	3.72411	84410675	48.2987	84410575
1021	chr3	101161650	101162449	+	800	0	101161997	101162202	101162147	101162099	206	4.5935	101161775	3.67531	101161775	100	101162075
1022	chr7	98170600	98172099	+	1500	0	98171147	98171377	98171322	98171262	231	4.59271	98171625	3.63084	98171625	85.3892	98171825
1023	chr10	126972300	126973199	+	900	0	126972922	126972867	126972767	126972894	-54	4.59243	126972875	3.6508	126972875	100	126972825
1024	chr2	172931450	172932449	+	1000	0	172931727	172931862	172931787	172931794	136	4.59203	172932225	3.71101	172932225	100	172931675
1025	chr11	94882800	94883599	+	800	0	94883132	94883282	94883207	94883207	151	4.59183	94883275	3.6348	94883225	100	94883125
1026	chr1	87169550	87170199	+	650	0	87169577	87170072	87169647	87169824	496	4.59158	87169725	3.65279	87169725	44.7013	87169625
1027	chr5	118537800	118538499	+	700	0	118537822	118538202	118538127	118538012	381	4.59153	118538025	3.62379	118538025	61.1903	118538125
1028	chr10	117519400	117520099	+	700	0	117519682	117519857	117519757	117519769	176	4.5913	117519625	3.66383	117519625	58.7441	117519675
1029	chr8	26834700	26835999	+	1300	0	26835452	26835572	26835522	26835512	121	4.59108	26834975	3.61427	26834975	100	26835425
1030	chr14	25042850	25043749	+	900	0	25042927	25043282	25043002	25043104	356	4.59098	25043475	3.66101	25043475	65.8546	25043325
1031	chr16	17809050	17809999	+	950	0	17809482	17809872	17809342	17809677	391	4.59028	17809375	3.6173	17809375	80.8941	17809325
1032	chr11	69364800	69366399	+	1600	0	69365087	69365262	69365187	69365174	176	4.59013	69365875	3.6367	69365875	100	69365125
1033	chr11	116647300	116649499	+	2200	0	116647577	116648252	116647652	116647914	676	4.59008	116648725	3.77138	116648725	100	116647575
1034	chr7	145110450	145111649	+	1200	0	145110772	145111087	145111012	145110929	316	4.59	145110725	3.69266	145110725	72.6646	145111125
1035	chr14	70470500	70471199	+	700	0	70470607	70470817	70470767	70470712	211	4.58976	70470675	3.66956	70470675	94.8363	70470725
1036	chr5	111262550	111263699	+	1150	0	111262637	111263547	111262712	111263092	911	4.58897	111263475	3.74348	111263475	57.723	111263575
1037	chr8	27090250	27091699	+	1450	0	27091222	27091477	27091417	27091349	256	4.58876	27091525	3.79399	27091525	100	27091225
1038	chr16	18156800	18157199	+	400	0	18156867	18157092	18157017	18156979	226	4.58868	18156975	3.74395	18156975	64.3429	18157025
1039	chr3	21936350	21937649	+	1300	0	21936797	21936902	21936857	21936849	106	4.58857	21936625	3.63514	21936625	79.3753	21936725
1040	chr14	25226800	25227799	+	1000	0	25227197	25227297	25227282	25227247	101	4.58846	25227575	3.63464	25227575	100	25227225
1041	chr2	35662250	35663299	+	1050	0	35662972	35662957	35662937	35662964	-14	4.58821	35662625	3.70611	35662625	100	35662975
1042	chr1	132765800	132766349	+	550	0	132765942	132766332	132766322	132766137	391	4.58818	132765925	3.60808	132765925	59.2004	132766275
1043	chr12	109748900	109750499	+	1600	0	109749247	109750492	109749322	109749869	1246	4.58818	109749325	3.61937	109749325	79.2211	109749275
1044	chr16	92610450	92610749	+	300	0	92610452	92610667	92610512	92610559	216	4.58803	92610625	3.64353	92610625	30.8905	92610725
1045	chr2	166190600	166191599	+	1000	0	166190987	166191232	166191072	166191109	246	4.58799	166190725	3.7288	166190725	68.7557	166191075
1046	chr9	22814900	22815299	+	400	0	22814967	22815297	22815187	22815132	331	4.58774	22815125	3.68931	22815125	57.2414	22815225
1047	chr5	142811300	142813349	+	2050	0	142812957	142811757	142811682	142812357	-1199	4.58759	142812875	3.60787	142812875	92.4359	142812975
1048	chr16	92099000	92099349	+	350	0	92099072	92099217	92099142	92099144	146	4.58752	92099075	3.6451	92099075	54.4949	92099125
1049	chr4	139714550	139715899	+	1350	0	139715047	139715452	139715167	139715249	406	4.58731	139715425	4.13803	139715425	92.5167	139715275
1050	chr10	80853950	80854499	+	550	0	80854462	80854262	80854257	80854362	-199	4.58729	80854175	3.67146	80854175	57.6294	80854275
1051	chr15	85660650	85661249	+	600	0	85661032	85661067	85660992	85661049	36	4.587	85661025	3.63827	85661025	70.9217	85661025
1052	chrX	12066550	12067899	+	1350	0	12067157	12066832	12067192	12066994	-324	4.58693	12067475	3.65651	12067475	57.6475	12066725
1053	chr19	55722350	55722899	+	550	0	55722597	55722877	55722817	55722737	281	4.58678	55722775	3.62996	55722775	58.1178	55722675
1054	chr8	15028650	15029199	+	550	0	15028672	15028977	15028737	15028824	306	4.58666	15028775	3.64839	15028775	53.9353	15028725
1055	chr17	8375750	8376549	+	800	0	8375857	8376012	8375937	8375934	156	4.58649	8375875	3.78268	8375875	67.5602	8375925
1056	chr10	60799100	60801299	+	2200	0	60800222	60799437	60799497	60799829	-784	4.58645	60800275	3.67141	60800225	100	60799475
1057	chr18	54983850	54984399	+	550	0	54984067	54984272	54984192	54984169	206	4.58606	54984225	3.90765	54984225	59.1573	54984175
1058	chr1	162008550	162009599	+	1050	0	162009292	162009517	162009442	162009404	226	4.58563	162009075	3.6269	162009075	84.3993	162009425
1059	chr7	118448100	118448749	+	650	0	118448107	118448637	118448582	118448372	531	4.58543	118448625	3.60899	118448625	39.6625	118448625
1060	chr5	111232600	111233649	+	1050	0	111233137	111233337	111233227	111233237	201	4.5854	111233225	3.80156	111233225	100	111233225
1061	chr4	57153200	57154049	+	850	0	57153527	57153807	57153672	57153667	281	4.58529	57153625	3.65884	57153625	73.8095	57153675
1062	chr11	119177400	119178699	+	1300	0	119177607	119177787	119177682	119177697	181	4.58508	119177575	3.69952	119177575	77.3772	119177675
1063	chr8	91446600	91447049	+	450	0	91446682	91447007	91446747	91446844	326	4.58506	91446775	3.61345	91446775	52.7038	91446725
1064	chr2	30863400	30865299	+	1900	0	30864392	30864197	30864137	30864294	-194	4.58497	30863825	3.65107	30863825	100	30864175
1065	chr11	106161000	106161599	+	600	0	106161247	106161262	106161317	106161254	16	4.58484	106161275	3.65974	106161275	69.9844	106161275
1066	chr8	27106050	27107049	+	1000	0	27106582	27106687	27106657	27106634	106	4.58459	27106775	3.6129	27106775	100	27106575
1067	chr9	43205450	43206099	+	650	0	43205707	43205832	43205782	43205769	126	4.58423	43205675	3.65677	43205675	66.782	43205775
1068	chr17	25716850	25717799	+	950	0	25717102	25717662	25717587	25717382	561	4.58406	25717525	3.6235	25717525	69.6152	25717525
1069	chr11	51468600	51471549	+	2950	0	51470487	51469892	51470577	51470189	-594	4.58405	51470275	3.61525	51470275	100	51468875
1070	chr8	27091800	27092149	+	350	0	27091842	27091947	27091877	27091894	106	4.58405	27092025	3.67867	27092025	64.7668	27091925
1071	chr18	4793700	4794049	+	350	0	4793807	4793947	4793882	4793877	141	4.58375	4793925	3.61084	4793925	39.0031	4793875
1072	chr18	35937450	35938099	+	650	0	35937622	35937807	35937732	35937714	186	4.58374	35937675	3.61316	35937675	94.8615	35937725
1073	chr9	58134200	58135849	+	1650	0	58135422	58134817	58134717	58135119	-604	4.58358	58135525	3.67217	58135525	84.7619	58134725
1074	chr12	3887050	3887699	+	650	0	3887202	3887292	3887252	3887247	91	4.58339	3887325	3.61887	3887325	100	3887175
1075	chr5	137608200	137609949	+	1750	0	137608602	137608737	137608662	137608669	136	4.58328	137608625	3.7291	137608625	100	137608625
1076	chr14	70471550	70472299	+	750	0	70471662	70471707	70471737	70471684	46	4.58303	70472125	3.60503	70472125	100	70471725
1077	chr7	73593750	73594149	+	400	0	73593907	73593952	73594002	73593929	46	4.58262	73593975	3.79519	73593925	51.3462	73594025
1078	chr9	43260950	43261549	+	600	0	43261252	43261152	43261077	43261202	-99	4.58207	43261375	3.61863	43261375	88.9608	43261125
1079	chr2	169663850	169664249	+	400	0	169663922	169664137	169664067	169664029	216	4.58108	169663975	3.71785	169663975	51.005	169664075
1080	chr2	172738400	172739049	+	650	0	172738817	172738842	172738527	172738829	26	4.58102	172738625	3.7547	172738625	59.7401	172738725
1081	chr4	139599700	139600849	+	1150	0	139599987	139600102	139600037	139600044	116	4.58094	139600675	3.61812	139600675	100	139599925
1082	chr7	137297200	137298349	+	1150	0	137298002	137298162	137298087	137298082	161	4.5807	137298175	3.63382	137298225	98.2513	137298125
1083	chr4	107102600	107103049	+	450	0	107102682	107102952	107102872	107102817	271	4.58067	107102925	3.6367	107102875	96.8949	107102825
1084	chr19	47902550	47903449	+	900	0	47903142	47903262	47903182	47903202	121	4.58048	47903175	3.69292	47903175	91.8545	47903225
1085	chr18	54611450	54612749	+	1300	0	54612322	54612497	54612397	54612409	176	4.57977	54612425	3.77418	54612425	100	54612425
1086	chr10	61928450	61929649	+	1200	0	61929197	61929157	61929272	61929177	-39	4.57936	61929225	3.62582	61929225	89.8956	61929125
1087	chr12	8803750	8804399	+	650	0	8804057	8804202	8804132	8804129	146	4.57905	8804175	3.61975	8804175	98.4157	8804125
1088	chr4	124968250	124969599	+	1350	0	124968822	124969112	124968897	124968967	291	4.57843	124968925	3.65738	124968925	89.9108	124968925
1089	chr17	47946950	47947299	+	350	0	47947037	47947297	47947137	47947167	261	4.57842	47947125	3.70276	47947125	84.7489	47947125
1090	chr6	114917800	114919549	+	1750	0	114918342	114918457	114918427	114918399	116	4.57838	114918175	3.62099	114918225	81.5188	114918375
1091	chr2	29565550	29566399	+	850	0	29565712	29565882	29565807	29565797	171	4.57837	29565825	3.68949	29565825	99.1179	29565825
1092	chr9	44493150	44495549	+	2400	0	44494287	44494532	44494377	44494409	246	4.57808	44494475	3.63366	44494475	100	44494225
1093	chr8	83902600	83904399	+	1800	0	83903727	83903097	83903082	83903412	-629	4.57799	83903625	3.6928	83903625	100	83902975
1094	chr7	99354900	99355899	+	1000	0	99355487	99355532	99355577	99355509	46	4.57773	99355625	3.66043	99355675	87.8586	99355575
1095	chr10	81349100	81349749	+	650	0	81349402	81349637	81349512	81349519	236	4.5777	81349425	3.60837	81349425	73.5894	81349475
1096	chr7	29411450	29412499	+	1050	0	29411877	29411637	29411562	29411757	-239	4.57727	29411675	3.61512	29411675	92.9675	29411575
1097	chr2	133567050	133567449	+	400	0	133567207	133567392	133567277	133567299	186	4.57722	133567225	3.60985	133567225	46.2252	133567275
1098	chr11	120258450	120260249	+	1800	0	120259027	120259272	120259272	120259149	246	4.5768	120259275	3.61621	120259275	100	120259175
1099	chr2	118533400	118534299	+	900	0	118534132	118534097	118533997	118534114	-34	4.5762	118533525	3.5989	118533525	90.4788	118534025
1100	chr13	56633950	56634249	+	300	0	56634042	56634162	56634112	56634102	121	4.57589	56634125	3.77619	56634125	72.0664	56634125
1101	chr8	120276750	120278949	+	2200	0	120278067	120277792	120277757	120277929	-274	4.57588	120277775	3.61027	120277675	100	120277675
1102	chr14	27066900	27067749	+	850	0	27066907	27067122	27066972	27067014	216	4.57519	27067075	3.69253	27067075	100	27067025
1103	chr4	148925950	148927299	+	1350	0	148926417	148926687	148926492	148926552	271	4.57483	148926925	3.79146	148926825	100	148926475
1104	chr15	36901550	36902099	+	550	0	36901792	36901742	36901967	36901767	-49	4.57392	36901725	3.60605	36901725	90.263	36901775
1105	chr4	133093400	133094749	+	1350	0	133093502	133093892	133093552	133093697	391	4.57387	133093575	3.66943	133093575	100	133093575
1106	chr9	96985950	96987499	+	1550	0	96986427	96986527	96986457	96986477	101	4.57385	96986525	3.68947	96986525	100	96986475
1107	chr11	88560500	88561999	+	1500	0	88561152	88561262	88561192	88561207	111	4.57342	88561225	3.74585	88561225	100	88561175
1108	chr1	93216750	93217549	+	800	0	93217002	93217237	93217157	93217119	236	4.57341	93216975	3.67735	93216975	86.3969	93217175
1109	chr11	88332550	88333149	+	600	0	88332672	88332822	88332747	88332747	151	4.57329	88332825	3.64536	88332825	100	88332725
1110	chr8	119503450	119503849	+	400	0	119503472	119503692	119503617	119503582	221	4.57323	119503675	3.61933	119503675	85.536	119503575
1111	chr1	59487550	59488049	+	500	0	59487677	59487827	59487752	59487752	151	4.57308	59487875	3.78694	59487875	71.4802	59487775
1112	chr1	64097700	64098249	+	550	0	64097982	64098162	64098057	64098072	181	4.57294	64098025	3.6284	64098025	57.606	64098075
1113	chr1	178952350	178953149	+	800	0	178952887	178953077	178952987	178952982	191	4.57273	178952925	3.95441	178952925	69.989	178953025
1114	chr8	115158850	115159599	+	750	0	115158852	115159102	115158932	115158977	251	4.57266	115159125	3.83661	115159225	54.2886	115158975
1115	chr17	7033100	7034049	+	950	0	7033697	7033397	7033732	7033547	-299	4.5726	7033725	3.61679	7033725	94.8322	7033775
1116	chr8	25069500	25070799	+	1300	0	25070337	25070432	25070357	25070384	96	4.57251	25070325	3.61781	25070325	100	25070375
1117	chr17	46612350	46613799	+	1450	0	46613222	46612492	46613377	46612857	-729	4.57236	46613125	3.61873	46613075	97.7394	46613275
1118	chr6	118990600	118991199	+	600	0	118991047	118991187	118991122	118991117	141	4.57229	118990975	3.60131	118990975	48.889	118991125
1119	chr9	63196200	63198399	+	2200	0	63196222	63196527	63196312	63196374	306	4.57217	63198225	3.63187	63198225	89.4247	63196325
1120	chr4	107596950	107598749	+	1800	0	107598357	107597802	107597752	107598079	-554	4.57187	107597575	3.59792	107597575	100	107597475
1121	chr15	83029850	83030599	+	750	0	83029997	83030297	83030172	83030147	301	4.57167	83030125	3.62255	83030125	82.2966	83030175
1122	chr2	24917600	24918099	+	500	0	24917882	24917872	24917957	24917877	-9	4.57166	24917725	3.65129	24917725	43.6187	24917725
1123	chr17	56474150	56475599	+	1450	0	56474852	56474912	56474927	56474882	61	4.57132	56475475	3.6135	56475475	81.9886	56474925
1124	chr3	101163000	101164049	+	1050	0	101163432	101163722	101163552	101163577	291	4.57118	101163675	3.61924	101163675	85.5478	101163575
1125	chr18	69611750	69613649	+	1900	0	69612507	69612477	69612847	69612492	-29	4.57062	69612375	3.62691	69612375	100	69612425
1126	chr8	121951650	121951999	+	350	0	121951827	121951982	121951907	121951904	156	4.56994	121951825	3.59901	121951825	56.0919	121951925
1127	chr1	154704950	154705699	+	750	0	154705077	154705302	154705152	154705189	226	4.56979	154705125	3.61914	154705125	60.281	154705175
1128	chr11	116885650	116886149	+	500	0	116885652	116885962	116885887	116885807	311	4.56968	116885825	3.61558	116885825	54.3273	116885925
1129	chr10	60825400	60826899	+	1500	0	60826427	60826542	60826467	60826484	116	4.56958	60826525	3.60114	60826525	100	60826475
1130	chr15	89177000	89179449	+	2450	0	89177107	89177407	89177282	89177257	301	4.56946	89177375	3.5975	89177375	100	89177275
1131	chr4	128898450	128899549	+	1100	0	128899142	128899377	128899232	128899259	236	4.56932	128899225	3.60932	128899175	100	128898975
1132	chr9	63736800	63738249	+	1450	0	63737307	63737907	63737417	63737607	601	4.56915	63737375	3.69972	63737375	90.6332	63737425
1133	chr8	70405200	70405699	+	500	0	70405597	70405492	70405352	70405544	-104	4.56902	70405375	3.74773	70405375	54.9267	70405375
1134	chr5	52114650	52115049	+	400	0	52114847	52114937	52114922	52114892	91	4.56893	52114925	3.63332	52114925	69.574	52114875
1135	chr6	72512250	72512649	+	400	0	72512282	72512442	72512367	72512362	161	4.56883	72512375	3.76295	72512375	73.3998	72512375
1136	chr19	5845050	5845599	+	550	0	5845092	5845277	5845157	5845184	186	4.56873	5845225	3.63593	5845225	64.9149	5845175
1137	chr13	97215450	97216399	+	950	0	97215722	97215797	97215722	97215759	76	4.56829	97216025	3.65686	97216025	100	97215725
1138	chr11	90130550	90130899	+	350	0	90130787	90130832	90130757	90130809	46	4.56825	90130725	3.7016	90130725	40.0984	90130725
1139	chr19	55746000	55749449	+	3450	0	55747297	55747672	55747687	55747484	376	4.56814	55748825	3.6388	55748775	74.9971	55747675
1140	chr9	102714450	102715999	+	1550	0	102715482	102715382	102715182	102715432	-99	4.56799	102715075	3.60823	102715075	98.5311	102715475
1141	chr18	80041900	80042299	+	400	0	80042032	80042217	80042107	80042124	186	4.56796	80042125	3.65013	80042125	63.7226	80042175
1142	chr2	119172950	119173949	+	1000	0	119172962	119173357	119173112	119173159	396	4.56793	119173425	3.60078	119173475	52.194	119173125
1143	chr6	89584800	89585499	+	700	0	89584922	89585417	89585002	89585169	496	4.5671	89585375	3.62544	89585375	67.101	89585025
1144	chr8	91329350	91330899	+	1550	0	91329632	91329757	91329707	91329694	126	4.56669	91330425	3.74231	91330425	60.3855	91329675
1145	chr11	76466850	76468549	+	1700	0	76468392	76468512	76468437	76468452	121	4.56617	76467425	3.60221	76467425	79.8241	76468375
1146	chr1	184335350	184335699	+	350	0	184335477	184335512	184335547	184335494	36	4.56613	184335525	3.60396	184335525	44.0775	184335475
1147	chr11	88179750	88182049	+	2300	0	88180657	88180762	88180697	88180709	106	4.56602	88180675	3.5962	88180675	100	88180475
1148	chr2	33752650	33755149	+	2500	0	33753632	33753742	33753707	33753687	111	4.56597	33753725	3.613	33753725	100	33753625
1149	chr5	118635200	118635749	+	550	0	118635592	118635682	118635642	118635637	91	4.56576	118635575	3.77218	118635525	82.7581	118635625
1150	chr2	168167200	168167599	+	400	0	168167312	168167342	168167317	168167327	31	4.5657	168167425	3.93677	168167425	87.1076	168167325
1151	chr4	118470600	118471649	+	1050	0	118470762	118470792	118470797	118470777	31	4.56565	118471275	3.61512	118471275	61.0064	118471275
1152	chr4	152557950	152558749	+	800	0	152558292	152558402	152558332	152558347	111	4.56528	152558575	3.59427	152558575	76.1454	152558475
1153	chr5	33529200	33530249	+	1050	0	33529437	33529737	33529522	33529587	301	4.56528	33529625	3.79055	33529625	100	33529525
1154	chr6	101252300	101253649	+	1350	0	101253317	101253457	101253382	101253387	141	4.56427	101253375	3.68968	101253225	100	101253325
1155	chr15	53298600	53299199	+	600	0	53298692	53299117	53298767	53298904	426	4.56426	53298775	3.63713	53298775	58.1247	53298775
1156	chr10	58652500	58653099	+	600	0	58652747	58652727	58652672	58652737	-19	4.56424	58652875	3.62312	58652875	86.223	58652825
1157	chr6	50982100	50983899	+	1800	0	50982637	50982677	50982742	50982657	41	4.56366	50982675	3.64062	50982625	100	50982725
1158	chr12	73459750	73460999	+	1250	0	73460602	73460822	73460727	73460712	221	4.56357	73460775	3.6618	73460725	94.0003	73460775
1159	chr2	30719400	30720899	+	1500	0	30719772	30720577	30720522	30720174	806	4.56352	30720125	3.61808	30720125	100	30720075
1160	chr2	106756400	106757449	+	1050	0	106756802	106756602	106756872	106756702	-199	4.56344	106757175	3.61537	106757175	50.3835	106756625
1161	chr19	4236400	4236749	+	350	0	4236477	4236587	4236517	4236532	111	4.56301	4236625	3.93828	4236625	42.5559	4236575
1162	chr2	157418150	157419199	+	1050	0	157418492	157419012	157418567	157418752	521	4.56288	157418825	3.59426	157418825	90.7629	157418825
1163	chr15	66888100	66888749	+	650	0	66888287	66888642	66888567	66888464	356	4.56278	66888475	3.73109	66888475	70.9412	66888525
1164	chr17	29450650	29451449	+	800	0	29450862	29451247	29450922	29451054	386	4.56232	29450825	3.65927	29450825	95.2552	29450925
1165	chr7	112499400	112500399	+	1000	0	112499682	112499792	112499722	112499737	111	4.5616	112500225	3.62671	112500175	63.9749	112499725
1166	chr11	117307350	117309399	+	2050	0	117307832	117307937	117307862	117307884	106	4.56131	117308525	3.61105	117308525	99.6454	117307875
1167	chr4	62660950	62661749	+	800	0	62661362	62661392	62661332	62661377	31	4.56122	62661375	3.58901	62661375	91.5738	62661325
1168	chr14	121145250	121145899	+	650	0	121145627	121145687	121145687	121145657	61	4.56093	121145725	3.62564	121145725	79.6838	121145625
1169	chr15	101095450	101096299	+	850	0	101095642	101095702	101095622	101095672	61	4.56067	101095675	3.59742	101095675	87.3107	101095625
1170	chr3	51888150	51888899	+	750	0	51888527	51888757	51888687	51888642	231	4.56047	51888675	3.61556	51888675	81.387	51888675
1171	chr15	83734400	83735599	+	1200	0	83735442	83735172	83734522	83735307	-269	4.56042	83734575	3.59185	83734575	61.9622	83734525
1172	chr18	38573650	38574499	+	850	0	38573892	38573997	38573967	38573944	106	4.56026	38574275	3.58725	38574275	70.7532	38573975
1173	chr1	162208150	162208449	+	300	0	162208242	162208427	162208327	162208334	186	4.55997	162208275	3.59335	162208275	46.8933	162208375
1174	chr12	83201550	83201999	+	450	0	83201652	83201902	83201827	83201777	251	4.55978	83201825	3.59535	83201825	58.5579	83201825
1175	chr17	45585850	45586099	+	250	0	45585977	45586062	45586052	45586019	86	4.55973	45585975	3.61981	45585975	44.4059	45586025
1176	chr16	95870300	95870649	+	350	0	95870397	95870472	95870422	95870434	76	4.55968	95870475	3.62788	95870475	65.1879	95870425
1177	chr4	45453350	45454849	+	1500	0	45453482	45453557	45453557	45453519	76	4.55945	45454275	3.64236	45454275	100	45453525
1178	chr1	133492250	133493749	+	1500	0	133492787	133492907	133492832	133492847	121	4.55853	133493375	3.84958	133493375	61.9704	133493375
1179	chr11	114253650	114254049	+	400	0	114253787	114253947	114253872	114253867	161	4.55818	114253825	3.60865	114253825	61.3162	114253875
1180	chr1	127443200	127443699	+	500	0	127443432	127443642	127443507	127443537	211	4.55746	127443475	3.7351	127443475	71.5652	127443525
1181	chr8	34813900	34814949	+	1050	0	34814157	34814862	34814217	34814509	706	4.55744	34814325	3.58306	34814325	72.2014	34814225
1182	chr3	51749550	51750449	+	900	0	51749997	51749997	51749987	51749997	1	4.55709	51749925	3.60646	51749875	99.6656	51749975
1183	chr9	44111600	44112449	+	850	0	44112102	44112097	44112027	44112099	-4	4.55693	44112075	3.63071	44112125	77.9833	44112025
1184	chr5	106171850	106172649	+	800	0	106172162	106172512	106172382	106172337	351	4.55663	106172475	3.83914	106172475	48.0237	106172375
1185	chr12	25123700	25124049	+	350	0	25123847	25124022	25123932	25123934	176	4.55649	25123875	3.71553	25123875	55.14	25123975
1186	chr13	28629150	28630749	+	1600	0	28629617	28630687	28629707	28630152	1071	4.55614	28630275	3.60968	28630275	97.782	28630625
1187	chr14	31662400	31663249	+	850	0	31662962	31663087	31663012	31663024	126	4.55594	31662825	3.61709	31662775	100	31662925
1188	chr18	35868400	35868999	+	600	0	35868532	35868852	35868662	35868692	321	4.5556	35868575	3.62023	35868575	100	35868675
1189	chr5	67607600	67607949	+	350	0	67607602	67607897	67607797	67607749	296	4.55514	67607775	3.59528	67607775	46.9399	67607775
1190	chr11	117330650	117332249	+	1600	0	117331547	117330927	117331582	117331237	-619	4.55488	117331225	3.62177	117331125	100	117330825
1191	chr1	89922200	89923599	+	1400	0	89923077	89923382	89923302	89923229	306	4.55487	89922375	3.74222	89922375	89.7053	89923275
1192	chr14	22590250	22590899	+	650	0	22590592	22590887	22590667	22590739	296	4.55471	22590625	3.60389	22590625	66.3276	22590675
1193	chr8	110718700	110721099	+	2400	0	110719527	110719177	110719537	110719352	-349	4.55409	110719575	3.58963	110719575	100	110719525
1194	chr15	77798450	77798949	+	500	0	77798582	77798812	77798647	77798697	231	4.55406	77798725	3.59979	77798725	88.5467	77798725
1195	chr2	93567600	93568199	+	600	0	93567787	93567977	93567862	93567882	191	4.55391	93567825	3.68017	93567825	100	93567775
1196	chr2	166336750	166338149	+	1400	0	166337897	166337352	166337282	166337624	-544	4.55374	166337675	3.6154	166337675	75.6329	166337925
1197	chr10	42994100	42994849	+	750	0	42994607	42994687	42994617	42994647	81	4.55335	42994625	3.60816	42994625	68.3897	42994675
1198	chr11	52570550	52571399	+	850	0	52570792	52571292	52571262	52571042	501	4.55302	52570825	3.73278	52570775	52.6406	52571225
1199	chr2	165211350	165212399	+	1050	0	165211622	165211702	165211702	165211662	81	4.55272	165211975	3.63395	165211625	100	165211625
1200	chr15	64383550	64383899	+	350	0	64383592	64383662	64383582	64383627	71	4.55234	64383775	3.71444	64383775	44.0249	64383825
1201	chr7	137131900	137132299	+	400	0	137132087	137132152	137132092	137132119	66	4.55228	137132125	3.86366	137132125	81.9828	137132125
1202	chr11	94929250	94931049	+	1800	0	94929322	94930782	94930682	94930052	1461	4.55195	94930525	3.66988	94930525	86.3822	94930625
1203	chr4	136833000	136834699	+	1700	0	136834172	136834242	136834247	136834207	71	4.55194	136834225	3.5859	136834225	98.3391	136834175
1204	chr13	34249200	34249749	+	550	0	34249397	34249412	34249347	34249404	16	4.5518	34249425	3.60587	34249425	66.9121	34249375
1205	chr7	45812800	45813299	+	500	0	45812922	45813137	45813022	45813029	216	4.55166	45813075	3.58367	45813075	88.2478	45813025
1206	chr2	93618950	93619949	+	1000	0	93619377	93619647	93619562	93619512	271	4.5513	93619425	3.88808	93619475	100	93619425
1207	chr5	113452600	113453099	+	500	0	113452802	113453077	113452947	113452939	276	4.55112	113452925	3.5866	113452925	100	113452925
1208	chr8	125218900	125219599	+	700	0	125218967	125219412	125219022	125219189	446	4.55109	125219375	3.62871	125219375	61.4016	125219275
1209	chr4	155176400	155177299	+	900	0	155176892	155176617	155176542	155176754	-274	4.5503	155176825	3.58175	155176825	68.2727	155176575
1210	chr15	102370500	102371299	+	800	0	102370852	102371047	102370962	102370949	196	4.55025	102371125	3.58666	102371075	100	102370925
1211	chr14	27230200	27230699	+	500	0	27230467	27230442	27230462	27230454	-24	4.55015	27230525	3.58082	27230525	80.7065	27230425
1212	chr9	107703700	107707849	+	4150	0	107704572	107705002	107704642	107704787	431	4.55014	107706475	3.57609	107706475	90.7596	107704625
1213	chr5	35495500	35496549	+	1050	0	35496002	35496102	35496077	35496052	101	4.54994	35496025	3.63907	35496025	91.4005	35496075
1214	chr4	115862450	115863349	+	900	0	115863062	115863037	115863087	115863049	-24	4.54992	115863125	3.58153	115863125	90.5895	115863125
1215	chr11	35350250	35350699	+	450	0	35350522	35350527	35350582	35350524	6	4.54959	35350575	3.63897	35350575	50.2664	35350575
1216	chr9	60093050	60093449	+	400	0	60093292	60093412	60093337	60093352	121	4.54922	60093275	3.6269	60093275	48.5868	60093375
1217	chr19	5870600	5871949	+	1350	0	5871492	5871312	5871237	5871402	-179	4.54922	5871625	3.71742	5871625	81.5366	5871575
1218	chr8	70351350	70352349	+	1000	0	70351952	70352237	70352027	70352094	286	4.5489	70351525	3.58547	70351525	75.9538	70352025
1219	chr1	183102800	183103499	+	700	0	183102867	183103087	183102952	183102977	221	4.54854	183103025	3.5815	183103025	88.7845	183102975
1220	chr5	127310500	127311499	+	1000	0	127311062	127311357	127311282	127311209	296	4.54836	127310725	3.74307	127310725	88.9909	127311275
1221	chr4	154409700	154412049	+	2350	0	154410897	154410102	154410597	154410499	-794	4.54769	154410875	3.59596	154410875	100	154410525
1222	chr14	70037800	70039399	+	1600	0	70038227	70038362	70038287	70038294	136	4.54725	70038325	3.81514	70038325	100	70038175
1223	chr4	106906700	106909949	+	3250	0	106907542	106909602	106909567	106908572	2061	4.54669	106909425	3.58706	106909425	100	106907675
1224	chr2	166195650	166197199	+	1550	0	166196167	166197097	166197017	166196632	931	4.54665	166196275	3.5816	166196275	88.7873	166197025
1225	chr7	143415000	143415599	+	600	0	143415122	143415332	143415257	143415227	211	4.54662	143415175	3.63716	143415175	84.7176	143415225
1226	chr8	120282400	120285599	+	3200	0	120284822	120282722	120284912	120283772	-2099	4.54648	120282625	3.59665	120282625	100	120282525
1227	chr18	35813750	35815899	+	2150	0	35815597	35815652	35815657	35815624	56	4.54533	35814125	3.94089	35815725	100	35815075
1228	chr8	120289450	120290299	+	850	0	120289607	120289772	120289687	120289689	166	4.54499	120289625	3.58632	120289625	100	120289625
1229	chr1	74000250	74001099	+	850	0	74000582	74000547	74000642	74000564	-34	4.54478	74000675	3.62757	74000425	96.4325	74000675
1230	chr4	133040100	133042999	+	2900	0	133041992	133042392	133042067	133042192	401	4.54473	133041325	3.60056	133041325	100	133042025
1231	chr6	94094950	94095499	+	550	0	94095027	94095402	94095202	94095214	376	4.5447	94095125	3.61396	94095125	60.3397	94095225
1232	chr7	142532200	142533099	+	900	0	142532692	142532857	142532767	142532774	166	4.54459	142532375	3.57127	142532375	65.1245	142532775
1233	chr4	137142300	137142849	+	550	0	137142587	137142592	137142527	137142589	6	4.54421	137142575	3.58461	137142575	83.3902	137142575
1234	chr1	105784900	105785749	+	850	0	105785447	105785707	105785277	105785577	261	4.54383	105785575	3.65616	105785575	37.0071	105785625
1235	chr3	130315900	130316249	+	350	0	130315902	130316067	130315977	130315984	166	4.54335	130316075	3.7768	130316025	38.1349	130315975
1236	chr2	91953900	91954299	+	400	0	91954062	91954182	91954112	91954122	121	4.54324	91954125	3.6208	91954125	54.8083	91954125
1237	chr8	105520500	105521849	+	1350	0	105521202	105521472	105521292	105521337	271	4.5429	105521275	3.60018	105521275	100	105521275
1238	chr7	73164250	73165199	+	950	0	73165057	73164362	73164307	73164709	-694	4.54231	73164425	3.58172	73164425	36.4185	73164325
1239	chr1	74285850	74286349	+	500	0	74286032	74286027	74285967	74286029	-4	4.54221	74286025	3.58289	74286025	54.1894	74286025
1240	chr5	124528900	124530549	+	1650	0	124529017	124529617	124529572	124529317	601	4.54176	124529675	3.77273	124529675	63.0275	124529475
1241	chr4	154370500	154371849	+	1350	0	154370877	154371082	154371007	154370979	206	4.54166	154370925	3.57982	154370925	100	154370925
1242	chr10	17230250	17230549	+	300	0	17230492	17230377	17230257	17230434	-114	4.54154	17230425	3.5741	17230425	32.934	17230275
1243	chr2	49720450	49721199	+	750	0	49720517	49721132	49720707	49720824	616	4.54148	49721025	3.64764	49721075	82.4839	49721025
1244	chr2	93779200	93780399	+	1200	0	93779302	93780132	93779627	93779717	831	4.54147	93779675	3.65324	93779675	92.2196	93779625
1245	chr11	94160300	94161899	+	1600	0	94161087	94161377	94161242	94161232	291	4.54095	94161225	3.61561	94161225	100	94161225
1246	chr7	109156200	109156899	+	700	0	109156512	109156777	109156687	109156644	266	4.54093	109156575	3.57307	109156575	83.6368	109156725
1247	chr11	86958850	86960299	+	1450	0	86959167	86959612	86959247	86959389	446	4.54087	86959575	3.57842	86959575	85.8409	86959225
1248	chr3	101387750	101389599	+	1850	0	101387907	101389177	101389102	101388542	1271	4.54078	101387975	3.5903	101387975	100	101387975
1249	chr11	68214850	68216749	+	1900	0	68215037	68215612	68215537	68215324	576	4.54067	68215525	3.57345	68215525	80.5608	68215575
1250	chr6	99067450	99068049	+	600	0	99067752	99067902	99067827	99067827	151	4.5406	99067875	3.60479	99067875	68.3851	99067825
1251	chr12	28799700	28801499	+	1800	0	28800312	28800767	28800397	28800539	456	4.54047	28800875	3.59738	28800875	69.981	28800525
1252	chr7	37375400	37376749	+	1350	0	37376022	37376232	37376132	37376127	211	4.54016	37376125	3.58857	37376125	100	37376075
1253	chr5	137648000	137649049	+	1050	0	137648252	137648457	137648307	137648354	206	4.53984	137648325	3.60413	137648325	90.4797	137648275
1254	chr7	29431250	29432049	+	800	0	29431457	29431697	29431622	29431577	241	4.53974	29431625	3.5796	29431625	51.7158	29431625
1255	chr6	72217150	72218599	+	1450	0	72218147	72217547	72217477	72217847	-599	4.53959	72217325	3.57419	72217325	100	72217475
1256	chr14	70159500	70160849	+	1350	0	70159947	70160227	70160132	70160087	281	4.53881	70160225	3.69202	70160225	88.1812	70160175
1257	chr12	108265400	108266799	+	1400	0	108266207	108265987	108265962	108266097	-219	4.53867	108266575	3.62385	108266575	80.4711	108265975
1258	chr7	67142500	67143199	+	700	0	67142857	67142992	67142917	67142924	136	4.53861	67142825	3.58696	67142825	77.7991	67142925
1259	chr17	46616300	46617749	+	1450	0	46617122	46617257	46617182	46617189	136	4.5383	46617225	3.59137	46617225	100	46617075
1260	chr10	120420150	120420799	+	650	0	120420257	120420527	120420512	120420392	271	4.53808	120420375	3.71513	120420375	60.9939	120420375
1261	chr12	3884050	3885949	+	1900	0	3885677	3885832	3885752	3885754	156	4.53795	3885025	4.06891	3884925	100	3885675
1262	chr7	34765000	34765649	+	650	0	34765367	34765397	34765417	34765382	31	4.5378	34765275	3.56718	34765275	79.4969	34765425
1263	chr3	104961300	104962049	+	750	0	104961522	104962017	104961597	104961769	496	4.53737	104961875	3.60367	104961875	48.8137	104961875
1264	chr3	30143900	30144549	+	650	0	30143972	30144237	30144132	30144104	266	4.53731	30144075	3.5725	30144075	55.5577	30144125
1265	chr4	100853500	100853849	+	350	0	100853672	100853707	100853632	100853689	36	4.53727	100853675	3.62997	100853675	48.6748	100853725
1266	chr10	95193800	95194499	+	700	0	95194002	95194142	95194067	95194072	141	4.53705	95194125	3.57813	95194125	65.9891	95194125
1267	chr14	121108950	121110199	+	1250	0	121109712	121109827	121109787	121109769	116	4.53704	121109475	3.57479	121109475	100	121109275
1268	chr4	100798350	100799049	+	700	0	100798352	100798577	100798517	100798464	226	4.53692	100798575	3.72325	100798575	100	100798525
1269	chr15	76869800	76870549	+	750	0	76870277	76870447	76870352	76870362	171	4.53683	76870425	3.58831	76870425	99.2424	76870375
1270	chr2	145859500	145859949	+	450	0	145859792	145859827	145859742	145859809	36	4.53676	145859725	3.61847	145859725	85.7023	145859825
1271	chr3	87168900	87169449	+	550	0	87169072	87169377	87169032	87169224	306	4.53656	87169075	3.59773	87169075	49.6189	87169025
1272	chr2	172740050	172740599	+	550	0	172740157	172740322	172740247	172740239	166	4.53644	172740475	3.56645	172740475	79.9209	172740275
1273	chr16	18185350	18185999	+	650	0	18185397	18185917	18185807	18185657	521	4.53641	18185475	3.83109	18185475	59.2661	18185825
1274	chr16	77019600	77020049	+	450	0	77019827	77019842	77019802	77019834	16	4.53634	77019875	3.57386	77019875	55.8745	77019925
1275	chr17	46118250	46118749	+	500	0	46118517	46118542	46118592	46118529	26	4.5347	46118625	3.58529	46118625	60.5472	46118525
1276	chr9	102978200	102978749	+	550	0	102978207	102978717	102978282	102978462	511	4.53466	102978575	3.56975	102978575	55.1506	102978575
1277	chr5	106574150	106574499	+	350	0	106574157	106574332	106574207	106574244	176	4.53455	106574325	3.57138	106574325	30.9556	106574225
1278	chr15	97821200	97822049	+	850	0	97822022	97821857	97821787	97821939	-164	4.53444	97821775	3.68978	97821775	70.0264	97821775
1279	chr16	33903600	33904449	+	850	0	33903942	33904107	33904022	33904024	166	4.53431	33904125	3.62037	33904075	99.7362	33904075
1280	chr15	79042800	79043249	+	450	0	79043192	79043247	79042852	79043219	56	4.53411	79042925	3.65945	79042925	53.3147	79042875
1281	chr5	119845350	119845799	+	450	0	119845472	119845612	119845537	119845542	141	4.5341	119845575	3.64223	119845575	69.2852	119845525
1282	chr4	107518650	107519249	+	600	0	107518937	107519027	107518952	107518982	91	4.53406	107518875	3.59842	107518875	87.9183	107518975
1283	chr12	86174500	86176349	+	1850	0	86176057	86176212	86176137	86176134	156	4.53404	86175075	3.64093	86175425	95.6501	86176175
1284	chr7	137267600	137268949	+	1350	0	137268212	137267882	137268267	137268047	-329	4.53395	137268225	3.60441	137268275	100	137268175
1285	chr14	24261550	24262699	+	1150	0	24262037	24262372	24262242	24262204	336	4.53384	24262125	3.5966	24262125	100	24262125
1286	chr3	153718650	153720649	+	2000	0	153719372	153719437	153719427	153719404	66	4.53366	153719725	3.6324	153719725	93.5726	153719475
1287	chr11	118362500	118363999	+	1500	0	118363492	118363247	118363182	118363369	-244	4.53324	118362775	3.58973	118362775	100	118362775
1288	chr9	46316150	46317099	+	950	0	46316232	46316722	46316682	46316477	491	4.5332	46316675	3.60212	46316675	57.5805	46316675
1289	chr11	116241450	116243099	+	1650	0	116242147	116241667	116241737	116241907	-479	4.53313	116242325	3.60206	116242325	94.1085	116242225
1290	chr18	80623100	80624349	+	1250	0	80623762	80624007	80623887	80623884	246	4.53305	80623825	3.73155	80623925	95.5237	80623925
1291	chr5	111010850	111011449	+	600	0	111011187	111011157	111011207	111011172	-29	4.53295	111011025	3.67257	111011025	71.2509	111011225
1292	chr10	61920300	61921649	+	1350	0	61920362	61920947	61920487	61920654	586	4.53269	61920825	3.59953	61920825	100	61920625
1293	chr13	109824900	109825349	+	450	0	109824957	109825157	109825112	109825057	201	4.53267	109825075	3.56567	109825075	75.9892	109825075
1294	chr6	128070550	128071049	+	500	0	128070682	128070872	128070802	128070777	191	4.53232	128070775	3.72335	128070775	60.5624	128070925
1295	chr6	72343750	72344149	+	400	0	72343752	72343887	72343812	72343819	136	4.53214	72344025	3.61143	72344025	35.9195	72343775
1296	chr5	127297800	127298549	+	750	0	127298112	127298302	127298212	127298207	191	4.53197	127298075	3.69662	127298075	78.4247	127298225
1297	chr14	25748200	25749749	+	1550	0	25749312	25749442	25749387	25749377	131	4.53179	25749275	3.60902	25749225	100	25749275
1298	chr12	80230600	80232199	+	1600	0	80231387	80231472	80231407	80231429	86	4.53135	80231425	3.6077	80231425	100	80231275
1299	chr3	55543850	55544549	+	700	0	55544012	55544547	55544072	55544279	536	4.53122	55544075	3.56235	55544075	62.6382	55544075
1300	chr11	113015300	113016399	+	1100	0	113015382	113015667	113015492	113015524	286	4.5312	113015975	3.59443	113016175	100	113015975
1301	chr4	133057200	133058399	+	1200	0	133057467	133057727	133057612	133057597	261	4.53068	133057575	3.64492	133057575	100	133057525
1302	chr18	80713850	80714149	+	300	0	80713887	80714077	80714022	80713982	191	4.53067	80714025	3.56432	80714025	61.3674	80714025
1303	chr4	128903600	128906249	+	2650	0	128904967	128906027	128905527	128905497	1061	4.53066	128904775	3.61942	128904775	100	128904175
1304	chr4	106840550	106842299	+	1750	0	106841767	106841337	106841857	106841552	-429	4.53064	106842075	3.58901	106842075	89.3795	106841825
1305	chr4	105260400	105261149	+	750	0	105260907	105261002	105260942	105260954	96	4.53063	105260925	3.57441	105260925	86.3792	105260975
1306	chr11	112977450	112978199	+	750	0	112977602	112977732	112977677	112977667	131	4.53047	112978025	3.6311	112978025	90.718	112977725
1307	chr6	72230600	72231749	+	1150	0	72230877	72231127	72231022	72231002	251	4.53041	72230975	3.60587	72230975	100	72230925
1308	chr17	70755800	70756099	+	300	0	70756057	70756087	70756012	70756072	31	4.5303	70755925	3.56148	70755925	48.682	70756025
1309	chr11	101881100	101882149	+	1050	0	101881277	101882022	101881922	101881649	746	4.52937	101881975	3.60844	101881875	72.1633	101881925
1310	chr9	32513850	32514999	+	1150	0	32514327	32514647	32514312	32514487	321	4.5289	32514675	3.56494	32514675	100	32514425
1311	chr11	94468400	94470449	+	2050	0	94469602	94469997	94469922	94469799	396	4.52868	94469425	3.566	94469425	100	94469925
1312	chr13	53233300	53234349	+	1050	0	53234047	53234252	53234177	53234149	206	4.52821	53234125	3.56599	53234125	100	53234125
1313	chr6	146413700	146414249	+	550	0	146413742	146413912	146413812	146413827	171	4.52815	146413825	3.56028	146413825	40.544	146413825
1314	chr4	137929350	137929949	+	600	0	137929437	137929612	137929517	137929524	176	4.52813	137929625	3.60811	137929625	78.7749	137929475
1315	chr6	128086050	128086699	+	650	0	128086377	128086267	128086452	128086322	-109	4.52806	128086325	3.57193	128086325	100	128086225
1316	chr11	96824350	96825499	+	1150	0	96824367	96824667	96824482	96824517	301	4.52775	96824975	3.57001	96824975	54.9664	96824575
1317	chr8	114504650	114505799	+	1150	0	114504867	114505187	114505137	114505027	321	4.52753	114505125	3.56935	114505125	100	114504925
1318	chr1	135740950	135741649	+	700	0	135741127	135741272	135741197	135741199	146	4.52712	135741225	3.59122	135741225	85.6092	135741225
1319	chr11	60113100	60114199	+	1100	0	60113677	60113252	60113762	60113464	-424	4.52698	60113825	3.56139	60113825	92.654	60113775
1320	chr14	76487500	76488449	+	950	0	76488007	76488152	76488077	76488079	146	4.52691	76487925	3.67589	76487875	100	76488025
1321	chr12	27139700	27140199	+	500	0	27139752	27140032	27139822	27139892	281	4.52685	27140075	3.67611	27140075	62.3471	27139975
1322	chr17	25083750	25084499	+	750	0	25083892	25084182	25084147	25084037	291	4.52669	25084175	3.57032	25084125	88.3762	25084175
1323	chr2	30853700	30854499	+	800	0	30853737	30854257	30854207	30853997	521	4.52663	30854025	3.63266	30854025	100	30854325
1324	chr13	97338200	97338749	+	550	0	97338357	97338492	97338432	97338424	136	4.52661	97338375	3.56095	97338375	97.6306	97338425
1325	chr6	54485250	54485799	+	550	0	54485507	54485677	54485582	54485592	171	4.52641	54485525	3.57216	54485525	65.2308	54485475
1326	chr1	133408150	133410549	+	2400	0	133408412	133409142	133408487	133408777	731	4.52615	133409375	3.81415	133409475	100	133408475
1327	chr11	88419200	88419549	+	350	0	88419392	88419472	88419422	88419432	81	4.52614	88419325	3.58723	88419325	71.1736	88419425
1328	chr19	55524000	55525649	+	1650	0	55524082	55524272	55524162	55524177	191	4.5259	55525175	3.67437	55525125	86.6265	55524175
1329	chr9	32720550	32721849	+	1300	0	32721272	32721557	32721432	32721414	286	4.52522	32721675	3.5575	32721675	100	32721325
1330	chr16	7186950	7187549	+	600	0	7187322	7187517	7187397	7187419	196	4.52513	7187125	3.60692	7187125	52.0452	7187425
1331	chr2	167588650	167589749	+	1100	0	167588802	167588992	167588877	167588897	191	4.52483	167589375	3.60512	167589325	99.9771	167589325
1332	chr15	88864150	88864649	+	500	0	88864492	88864622	88864567	88864557	131	4.52386	88864525	3.58996	88864525	73.8522	88864525
1333	chr3	55686900	55687749	+	850	0	55686992	55687222	55687087	55687107	231	4.52377	55687125	3.60589	55687125	100	55687075
1334	chr11	77497600	77498499	+	900	0	77498007	77498367	77498287	77498187	361	4.52335	77498175	3.67392	77498175	72.8928	77498025
1335	chr5	74621900	74622799	+	900	0	74622082	74622407	74622332	74622244	326	4.52297	74622275	3.60907	74622275	92.9142	74622325
1336	chr2	131177700	131179399	+	1700	0	131178862	131178792	131178717	131178827	-69	4.52248	131178375	3.63395	131178375	88.4316	131178775
1337	chr6	72714250	72715049	+	800	0	72714427	72714682	72714482	72714554	256	4.52235	72714475	3.64573	72714475	100	72714475
1338	chr9	56464750	56465099	+	350	0	56464827	56465077	56464977	56464952	251	4.52228	56464925	3.55512	56464925	49.5117	56465025
1339	chr1	165691400	165691999	+	600	0	165691667	165691792	165691742	165691729	126	4.52216	165691775	3.58388	165691775	100	165691725
1340	chr11	115344700	115346699	+	2000	0	115344847	115346417	115346422	115345632	1571	4.52197	115346275	3.56588	115346275	100	115345025
1341	chr14	75445100	75445599	+	500	0	75445437	75445552	75445492	75445494	116	4.52194	75445425	3.72177	75445425	44.6226	75445425
1342	chr16	4654650	4656999	+	2350	0	4655922	4656602	4656142	4656262	681	4.52193	4655625	3.56472	4655675	100	4656075
1343	chr7	34896600	34897699	+	1100	0	34897057	34897357	34897197	34897207	301	4.521	34897025	3.61873	34897025	65.027	34897175
1344	chr6	48443250	48443749	+	500	0	48443357	48443547	48443432	48443452	191	4.52092	48443375	3.70754	48443425	71.6049	48443475
1345	chr6	88811600	88812349	+	750	0	88811862	88812347	88811987	88812104	486	4.52066	88811875	3.57404	88811875	71.1954	88812025
1346	chr14	122406600	122407149	+	550	0	122406702	122406902	122406827	122406802	201	4.52059	122406825	3.55673	122406825	53.1268	122406825
1347	chr11	108929500	108931099	+	1600	0	108929672	108930742	108929757	108930207	1071	4.52039	108930625	3.61863	108930475	86.8037	108929775
1348	chr4	45433900	45435499	+	1600	0	45435227	45434842	45435307	45435034	-384	4.52012	45435275	3.63629	45435275	86.2326	45435275
1349	chr12	109554500	109555099	+	600	0	109554992	109555077	109555002	109555034	86	4.5201	109554725	3.56567	109554725	58.9072	109555025
1350	chr5	66967700	66968199	+	500	0	66967722	66967942	66967802	66967832	221	4.51999	66967975	3.5826	66967975	86.704	66967875
1351	chr4	128670850	128671649	+	800	0	128671027	128671382	128671037	128671204	356	4.51998	128671025	3.66035	128671025	68.8655	128671075
1352	chr4	135547600	135549699	+	2100	0	135547757	135548177	135548277	135547967	421	4.51946	135549025	3.62223	135549025	88.5971	135548325
1353	chr1	75398950	75401249	+	2300	0	75399112	75399457	75399182	75399284	346	4.51904	75399475	3.66872	75399475	100	75399125
1354	chr1	91799150	91800499	+	1350	0	91800087	91799817	91800177	91799952	-269	4.51888	91799725	3.60404	91799725	83.1115	91800125
1355	chr4	100796900	100797849	+	950	0	100797057	100797257	100797177	100797157	201	4.51855	100797125	3.55874	100797125	100	100797175
1356	chr5	24348100	24349049	+	950	0	24348652	24348822	24348732	24348737	171	4.51849	24348675	3.59651	24348675	77.3772	24348725
1357	chr9	114530900	114531799	+	900	0	114531002	114531122	114531072	114531062	121	4.51829	114531125	3.68237	114531125	80.5556	114531025
1358	chr12	112154600	112155999	+	1400	0	112155472	112155647	112155577	112155559	176	4.51816	112155625	3.55378	112155625	96.8288	112155575
1359	chr7	45920450	45920999	+	550	0	45920777	45920832	45920852	45920804	56	4.51813	45920825	3.583	45920825	51.7979	45920825
1360	chr8	121372350	121372749	+	400	0	121372492	121372597	121372507	121372544	106	4.51799	121372525	3.84682	121372525	66.0533	121372525
1361	chr2	152729300	152730649	+	1350	0	152729987	152730117	152730042	152730052	131	4.5179	152729625	3.62416	152729625	74.9821	152730075
1362	chr4	126300900	126301449	+	550	0	126301062	126301267	126301167	126301164	206	4.51786	126301175	3.61932	126301175	93.6063	126301225
1363	chr6	54145650	54146549	+	900	0	54146097	54146182	54146202	54146139	86	4.51777	54146175	3.60065	54146175	53.0664	54146225
1364	chr16	39122600	39122849	+	250	0	39122752	39122777	39122737	39122764	26	4.51767	39122725	3.59091	39122775	41.7163	39122725
1365	chr1	74001400	74001899	+	500	0	74001542	74001752	74001627	74001647	211	4.51761	74001725	3.7016	74001725	84.3412	74001625
1366	chr4	47139100	47140049	+	950	0	47139457	47139637	47139532	47139547	181	4.5171	47139775	3.61346	47139725	84.7619	47139575
1367	chr5	111025050	111025849	+	800	0	111025642	111025747	111025697	111025694	106	4.51709	111025625	3.75588	111025625	82.2072	111025675
1368	chr12	79847100	79848849	+	1750	0	79847472	79847507	79847547	79847489	36	4.517	79848275	3.65216	79848275	79.669	79848625
1369	chr3	131157150	131157899	+	750	0	131157487	131157677	131157592	131157582	191	4.51646	131157575	3.62825	131157625	100	131157575
1370	chr10	80932200	80933149	+	950	0	80932802	80932942	80932877	80932872	141	4.51617	80932975	3.56415	80932975	100	80932825
1371	chr11	95575050	95576299	+	1250	0	95575662	95575927	95575722	95575794	266	4.51608	95575325	3.55563	95575325	100	95575375
1372	chr13	51378150	51379699	+	1550	0	51378392	51379122	51379052	51378757	731	4.51601	51379075	3.57746	51379075	95.2363	51379075
1373	chr16	17553700	17554649	+	950	0	17554317	17554497	17554422	17554407	181	4.51598	17554475	3.63209	17554475	100	17554375
1374	chr5	128618700	128621699	+	3000	0	128619677	128619737	128619752	128619707	61	4.51589	128621075	3.58019	128621075	100	128619125
1375	chr8	71725150	71725599	+	450	0	71725207	71725417	71725342	71725312	211	4.51575	71725275	3.56636	71725275	44.4422	71725325
1376	chr4	45578450	45579049	+	600	0	45578487	45578837	45578652	45578662	351	4.51574	45578725	3.62589	45578625	81.6034	45578675
1377	chr12	109457150	109458349	+	1200	0	109457567	109458057	109457642	109457812	491	4.51573	109457925	3.63638	109457925	79.1709	109457725
1378	chr2	167851200	167853499	+	2300	0	167851852	167851607	167851472	167851729	-244	4.51572	167851675	3.57655	167851675	91.7828	167851775
1379	chr6	94640350	94640699	+	350	0	94640437	94640587	94640512	94640512	151	4.51515	94640525	3.69153	94640575	47.4578	94640475
1380	chr8	120229250	120230499	+	1250	0	120229697	120229817	120229737	120229757	121	4.51514	120229475	3.64003	120229475	96.4771	120229775
1381	chr2	179835600	179835999	+	400	0	179835742	179835822	179835752	179835782	81	4.51505	179835775	3.55943	179835775	67.9332	179835725
1382	chr4	117353250	117354049	+	800	0	117353612	117353772	117353697	117353692	161	4.515	117353725	3.59864	117353725	66.8447	117353675
1383	chr2	152804350	152805199	+	850	0	152804467	152804717	152804542	152804592	251	4.51466	152804525	3.58575	152804525	91.7685	152804525
1384	chr4	54374250	54375149	+	900	0	54374652	54374717	54374642	54374684	66	4.51432	54374775	3.57574	54374775	100	54374675
1385	chr8	120265050	120265949	+	900	0	120265657	120265737	120265717	120265697	81	4.51429	120265725	3.77516	120265725	100	120265675
1386	chr16	30231900	30232499	+	600	0	30232232	30231957	30231917	30232094	-274	4.51391	30232225	3.75704	30232225	46.6032	30232275
1387	chr5	139729950	139731699	+	1750	0	139731307	139731472	139731392	139731389	166	4.51389	139731375	3.59036	139731375	100	139731275
1388	chr13	60058300	60058799	+	500	0	60058627	60058692	60058617	60058659	66	4.51385	60058625	3.71287	60058625	43.2977	60058625
1389	chr11	114636700	114636999	+	300	0	114636812	114636977	114636902	114636894	166	4.51369	114636875	3.55134	114636875	37.3526	114636875
1390	chr1	75449850	75450949	+	1100	0	75450507	75450752	75450677	75450629	246	4.51325	75450675	3.58385	75450675	100	75450675
1391	chr10	117020850	117021849	+	1000	0	117021557	117021567	117021582	117021562	11	4.51274	117021625	3.605	117021575	92.3676	117021575
1392	chr12	109517900	109518749	+	850	0	109518197	109518367	109518287	109518282	171	4.51263	109518175	3.79839	109518175	67.0283	109518275
1393	chr4	154779750	154781449	+	1700	0	154780717	154780967	154780912	154780842	251	4.51246	154780425	3.59356	154780425	100	154780825
1394	chr15	101093300	101095249	+	1950	0	101093537	101093762	101093662	101093649	226	4.51225	101093625	3.72909	101093625	100	101093575
1395	chr16	44550000	44550399	+	400	0	44550352	44550207	44550132	44550279	-144	4.51207	44550175	3.63828	44550175	54.2217	44550125
1396	chr1	92178650	92178949	+	300	0	92178757	92178707	92178717	92178732	-49	4.51195	92178825	3.58811	92178825	47.8248	92178725
1397	chr18	75260500	75260899	+	400	0	75260542	75260857	75260707	75260699	316	4.51192	75260675	3.8455	75260675	100	75260625
1398	chr5	107222550	107223699	+	1150	0	107223237	107223662	107223357	107223449	426	4.5113	107222925	3.55039	107222925	62.4397	107223025
1399	chr4	106101250	106102399	+	1150	0	106101587	106101922	106101777	106101754	336	4.51088	106101525	3.64148	106101525	91.7912	106101775
1400	chr4	126257250	126257949	+	700	0	126257322	126257712	126257517	126257517	391	4.51063	126257475	3.6126	126257475	90.1967	126257425
1401	chr1	135579700	135582249	+	2550	0	135579912	135580242	135580167	135580077	331	4.5106	135581125	3.65286	135581125	100	135579925
1402	chr1	59332150	59334549	+	2400	0	59333242	59333672	59333577	59333457	431	4.51055	59332375	3.57425	59332425	100	59333275
1403	chr2	52958400	52959349	+	950	0	52958422	52958597	52958502	52958509	176	4.51049	52958675	3.55317	52958675	81.1582	52958525
1404	chr4	154588550	154589299	+	750	0	154588937	154588912	154589012	154588924	-24	4.51004	154588725	3.55487	154588725	71.472	154588925
1405	chr2	167595500	167596049	+	550	0	167595647	167595917	167595827	167595782	271	4.51002	167595725	3.73843	167595725	100	167595725
1406	chr16	4551800	4553849	+	2050	0	4552362	4552797	4552752	4552579	436	4.50949	4553625	3.60293	4553625	82.6792	4552775
1407	chr2	31771300	31771549	+	250	0	31771337	31771342	31771387	31771339	6	4.50908	31771425	3.56787	31771425	33.4898	31771375
1408	chr10	99524650	99525299	+	650	0	99525087	99525147	99525072	99525117	61	4.50862	99525175	3.55807	99525175	52.8964	99525075
1409	chr7	34798100	34800149	+	2050	0	34798472	34799347	34799337	34798909	876	4.50857	34798575	3.57759	34799325	84.2257	34799325
1410	chr6	71439050	71439349	+	300	0	71439177	71439327	71439252	71439252	151	4.50769	71439225	3.60443	71439225	48.2666	71439275
1411	chr2	73541050	73541499	+	450	0	73541197	73541377	73541292	73541287	181	4.50765	73541325	3.60773	73541325	74.4613	73541325
1412	chr2	165136150	165137499	+	1350	0	165136852	165136797	165136717	165136824	-54	4.50762	165136525	3.58093	165136975	71.1351	165136875
1413	chr4	136135300	136136149	+	850	0	136135877	136136032	136135957	136135954	156	4.5073	136135975	3.54644	136135975	79.7657	136135925
1414	chr9	63983950	63984949	+	1000	0	63984562	63984807	63984667	63984684	246	4.50727	63984725	3.55665	63984725	100	63984675
1415	chr12	25272650	25273149	+	500	0	25272952	25273122	25273027	25273037	171	4.50713	25272825	3.6789	25272825	60.2451	25273075
1416	chr7	145172950	145173499	+	550	0	145173192	145173342	145173267	145173267	151	4.5065	145173375	3.56157	145173375	50.6859	145173325
1417	chr7	142538150	142539949	+	1800	0	142538662	142538897	142538747	142538779	236	4.50647	142538675	3.54584	142538675	97.3965	142538725
1418	chr19	46517850	46519499	+	1650	0	46518477	46518597	46518542	46518537	121	4.50642	46518025	3.68873	46518025	100	46518525
1419	chr12	109410800	109413699	+	2900	0	109411572	109413477	109413402	109412524	1906	4.50632	109412075	3.6097	109412125	96.4231	109413425
1420	chr4	152007700	152008149	+	450	0	152008007	152007727	152008027	152007867	-279	4.5059	152007925	3.55149	152007925	45.6122	152007975
1421	chr4	99154550	99154949	+	400	0	99154672	99154827	99154752	99154749	156	4.50554	99154775	3.56509	99154775	66.1113	99154775
1422	chr4	149736300	149736999	+	700	0	149736717	149736902	149736822	149736809	186	4.50544	149736825	3.62558	149736825	81.7751	149736775
1423	chr9	33105050	33105749	+	700	0	33105387	33105692	33105497	33105539	306	4.50528	33105575	3.6435	33105575	55.4507	33105475
1424	chr17	86379850	86380449	+	600	0	86379967	86380392	86380022	86380179	426	4.50521	86380325	3.65353	86380325	51.6921	86380025
1425	chr10	59911100	59912149	+	1050	0	59911877	59911817	59911742	59911847	-59	4.50518	59911525	3.54325	59911525	93.6724	59911825
1426	chr4	154694000	154694449	+	450	0	154694062	154694092	154694017	154694077	31	4.50516	154694225	3.55098	154694225	59.3374	154694125
1427	chr4	123138350	123139199	+	850	0	123138387	123138742	123138457	123138564	356	4.50513	123139025	3.59131	123139075	69.4232	123138525
1428	chr2	166559550	166560149	+	600	0	166559657	166559892	166559717	166559774	236	4.50493	166559725	3.54445	166559725	56.5157	166559725
1429	chr4	45494800	45496149	+	1350	0	45495652	45495137	45494937	45495394	-514	4.50475	45495125	3.55458	45495125	100	45495025
1430	chr15	89089900	89090599	+	700	0	89090042	89090152	89090117	89090097	111	4.5046	89090275	3.56187	89090275	42.2383	89090175
1431	chr8	117339400	117340199	+	800	0	117339667	117339822	117339747	117339744	156	4.50423	117339775	3.53991	117339775	80.3989	117339725
1432	chr18	60946950	60948149	+	1200	0	60947597	60947722	60947697	60947659	126	4.504	60947225	3.57306	60947225	94.4138	60947725
1433	chr15	103302450	103304849	+	2400	0	103304127	103302937	103302892	103303532	-1189	4.50398	103303025	3.64398	103303025	100	103302825
1434	chr11	96776600	96777049	+	450	0	96776672	96776667	96776987	96776669	-4	4.50388	96776875	3.56572	96776875	43.3845	96776975
1435	chr19	45575050	45576499	+	1450	0	45575997	45576062	45576037	45576029	66	4.50367	45576075	3.56754	45576075	78.657	45576025
1436	chr18	65530900	65531899	+	1000	0	65530977	65531607	65531677	65531292	631	4.50346	65531625	3.56514	65531625	51.8083	65531675
1437	chr10	99269400	99271299	+	1900	0	99270627	99270837	99270762	99270732	211	4.50335	99270625	3.58304	99270625	100	99270225
1438	chr1	135563050	135563749	+	700	0	135563192	135563587	135563267	135563389	396	4.50314	135563375	3.55702	135563375	100	135563225
1439	chr6	100336450	100337399	+	950	0	100336547	100336732	100336637	100336639	186	4.50311	100336625	3.56982	100336625	89.4482	100336625
1440	chr5	74154950	74155749	+	800	0	74154982	74155147	74155072	74155064	166	4.50305	74155425	3.59721	74155425	65.2933	74155075
1441	chr2	168072600	168073099	+	500	0	168072827	168072967	168072902	168072897	141	4.5028	168072775	3.55513	168072775	84.195	168072875
1442	chr6	29513900	29514199	+	300	0	29514182	29514127	29513932	29514154	-54	4.5026	29514075	3.57519	29514075	24.6746	29513975
1443	chr12	107962850	107963799	+	950	0	107963482	107963577	107963557	107963529	96	4.50253	107963425	3.55679	107963425	85.5062	107963575
1444	chr8	122638600	122639999	+	1400	0	122639742	122639862	122639787	122639802	121	4.50233	122639725	3.6329	122639725	100	122639825
1445	chr2	91965350	91965849	+	500	0	91965482	91965722	91965557	91965602	241	4.50216	91965575	3.56703	91965525	79.1241	91965575
1446	chr8	120322450	120323349	+	900	0	120322922	120323022	120322947	120322972	101	4.50186	120322875	3.56069	120322875	100	120322925
1447	chr18	60672000	60672549	+	550	0	60672217	60672342	60672292	60672279	126	4.50174	60672325	3.58451	60672275	65.729	60672325
1448	chr5	113788000	113789649	+	1650	0	113789022	113788737	113789097	113788879	-284	4.50167	113788325	3.61176	113788325	100	113788675
1449	chr14	55852100	55852799	+	700	0	55852437	55852582	55852512	55852509	146	4.50145	55852525	3.5399	55852525	91.9442	55852475
1450	chr1	90520300	90520849	+	550	0	90520672	90520372	90520307	90520522	-299	4.50138	90520675	3.55273	90520725	62.7249	90520575
1451	chr13	44416800	44417549	+	750	0	44417267	44417512	44417402	44417389	246	4.5012	44417075	3.59111	44417075	80.9101	44417425
1452	chr8	91532700	91533099	+	400	0	91532762	91532872	91532797	91532817	111	4.50087	91532875	3.86048	91532925	62.4787	91532875
1453	chr17	8508550	8508899	+	350	0	8508652	8508827	8508717	8508739	176	4.50069	8508725	3.54726	8508725	98.9868	8508725
1454	chr19	48115350	48115999	+	650	0	48115537	48115832	48115622	48115684	296	4.50047	48115575	3.54349	48115625	53.396	48115675
1455	chr3	122518600	122520449	+	1850	0	122519522	122519532	122520012	122519527	11	4.50019	122519975	3.71292	122519975	95.3897	122519575
1456	chr5	120566700	120569399	+	2700	0	120567912	120568422	120568352	120568167	511	4.49993	120568275	3.54505	120568325	100	120567975
1457	chr1	172297450	172298549	+	1100	0	172298147	172297967	172298212	172298057	-179	4.49961	172298375	3.56996	172298375	81.3453	172298225
1458	chr1	162015700	162016249	+	550	0	162015822	162015892	162015862	162015857	71	4.4996	162015875	3.58911	162015875	58.0745	162015875
1459	chr8	26672100	26672849	+	750	0	26672427	26672717	26672652	26672572	291	4.49957	26672575	3.7536	26672625	87.9121	26672625
1460	chr2	75424900	75425899	+	1000	0	75425057	75425582	75425127	75425319	526	4.49923	75425425	3.62478	75425425	62.9828	75425125
1461	chr4	43884700	43885549	+	850	0	43884802	43884892	43884817	43884847	91	4.49878	43884875	3.60564	43884875	72.4703	43884825
1462	chr19	4037150	4037549	+	400	0	4037507	4037407	4037322	4037457	-99	4.49872	4037325	3.56217	4037325	46.9194	4037325
1463	chr2	33580800	33583149	+	2350	0	33582677	33581542	33582757	33582109	-1134	4.4986	33582775	3.60083	33581025	100	33582725
1464	chr4	88762550	88762999	+	450	0	88762607	88762997	88762662	88762802	391	4.49855	88762675	3.54085	88762675	37.4601	88762925
1465	chr14	114953300	114953599	+	300	0	114953327	114953542	114953412	114953434	216	4.49852	114953425	3.5964	114953425	39.1205	114953475
1466	chr1	155061100	155061699	+	600	0	155061152	155061367	155061292	155061259	216	4.4985	155061525	3.53674	155061525	60.2802	155061275
1467	chr16	21869150	21869399	+	250	0	21869272	21869382	21869347	21869327	111	4.49848	21869275	3.57235	21869275	70.5415	21869325
1468	chr6	114901750	114903299	+	1550	0	114902207	114902417	114902342	114902312	211	4.49848	114902375	3.59476	114902375	100	114902225
1469	chr11	118366900	118367149	+	250	0	118366902	118367147	118367077	118367024	246	4.49752	118366975	3.57854	118366975	37.5609	118367075
1470	chr12	100990700	100991149	+	450	0	100990797	100991022	100990927	100990909	226	4.49746	100990975	3.87714	100990975	90.8859	100990925
1471	chr3	55524450	55525399	+	950	0	55524527	55524642	55524602	55524584	116	4.49741	55525225	3.55066	55525225	84.534	55524625
1472	chr7	136214550	136215649	+	1100	0	136215357	136215122	136215437	136215239	-234	4.49693	136215125	3.65578	136215125	82.4933	136215125
1473	chr2	73592100	73593599	+	1500	0	73592637	73593467	73593147	73593052	831	4.49682	73593425	3.54327	73593425	63.8223	73593375
1474	chr7	68114050	68115999	+	1950	0	68115177	68115287	68115217	68115232	111	4.49674	68115175	3.57429	68115175	95.8278	68115175
1475	chr7	115500800	115501499	+	700	0	115501302	115501177	115501102	115501239	-124	4.49656	115501325	3.54616	115501325	57.0106	115501325
1476	chr8	120558600	120561049	+	2450	0	120559942	120560107	120560042	120560024	166	4.4964	120559175	3.7574	120559175	100	120559975
1477	chr7	137269350	137270649	+	1300	0	137270062	137270067	137270032	137270064	6	4.49629	137270275	3.55401	137270275	87.4595	137270075
1478	chr14	25041650	25042399	+	750	0	25042062	25042202	25042137	25042132	141	4.49574	25042175	3.53519	25042175	100	25042075
1479	chr15	97837650	97838249	+	600	0	97837912	97837822	97837987	97837867	-89	4.49568	97838025	3.53218	97838025	58.5817	97837775
1480	chr9	107567500	107568149	+	650	0	107567812	107567827	107567752	107567819	16	4.49551	107567675	3.63527	107567675	100	107567725
1481	chr17	25833850	25834799	+	950	0	25834097	25834617	25834507	25834357	521	4.49546	25834475	3.5521	25834475	100	25834475
1482	chr13	63525550	63528799	+	3250	0	63527962	63527587	63528062	63527774	-374	4.49535	63528125	3.5641	63528025	86.0929	63528075
1483	chr8	120298950	120299749	+	800	0	120299077	120299192	120299127	120299134	116	4.49533	120299525	3.6699	120299525	100	120299075
1484	chr6	94681000	94682399	+	1400	0	94681982	94682097	94682022	94682039	116	4.49529	94681125	3.5411	94681125	80.8894	94682025
1485	chr3	95674800	95675849	+	1050	0	95674967	95675077	95675002	95675022	111	4.49521	95675025	3.62291	95675025	100	95674975
1486	chr4	149968750	149969249	+	500	0	149968857	149968952	149968932	149968904	96	4.49507	149968875	3.568	149968875	72.6323	149968925
1487	chr17	30349400	30349849	+	450	0	30349522	30349502	30349427	30349512	-19	4.49502	30349675	3.56837	30349675	57.5623	30349525
1488	chr11	99081950	99082499	+	550	0	99082087	99082412	99082337	99082249	326	4.49459	99082275	3.53794	99082275	88.3489	99082325
1489	chr2	165874600	165877299	+	2700	0	165875087	165875492	165875157	165875289	406	4.49458	165875475	3.63738	165875375	100	165875275
1490	chr3	55587500	55589949	+	2450	0	55588702	55589607	55589522	55589154	906	4.49423	55588725	3.53526	55588725	82.9474	55588675
1491	chr9	58114150	58114999	+	850	0	58114582	58114522	58114447	58114552	-59	4.49423	58114725	4.03928	58114725	86.9764	58114625
1492	chr5	125150600	125153049	+	2450	0	125151832	125151642	125151557	125151737	-189	4.49423	125152275	3.73469	125152275	100	125150825
1493	chr2	165741500	165741999	+	500	0	165741662	165741762	165741952	165741712	101	4.49418	165741675	3.76562	165741675	41.3976	165741975
1494	chr8	122659150	122660099	+	950	0	122659252	122659267	122659302	122659259	16	4.49414	122659325	3.68589	122659675	100	122659325
1495	chr11	117273200	117274799	+	1600	0	117274067	117274142	117274087	117274104	76	4.49411	117274075	3.60682	117274075	100	117274075
1496	chr10	120400150	120401199	+	1050	0	120400917	120400727	120400592	120400822	-189	4.49407	120400775	3.5988	120400925	75.6295	120400975
1497	chr8	87894300	87896599	+	2300	0	87895662	87895812	87895737	87895737	151	4.49385	87895725	3.5482	87895725	100	87895725
1498	chr17	44601950	44602249	+	300	0	44601987	44602177	44602062	44602082	191	4.49383	44602075	3.61767	44602075	53.0974	44602075
1499	chr3	101404550	101405349	+	800	0	101404657	101404917	101404752	101404787	261	4.49379	101404975	3.61302	101404925	87.0813	101404875
1500	chr2	166146300	166147099	+	800	0	166146582	166146717	166146582	166146649	136	4.49378	166146725	3.61399	166146725	68.8566	166146625
1501	chr9	61379500	61381099	+	1600	0	61380602	61380637	61380677	61380619	36	4.49362	61380825	3.55821	61380775	84.0996	61380775
1502	chr2	92007050	92007649	+	600	0	92007337	92007552	92007432	92007444	216	4.49268	92007525	3.55263	92007475	96.4776	92007425
1503	chr19	58126200	58126749	+	550	0	58126412	58126737	58126487	58126574	326	4.49222	58126375	3.7949	58126425	72.3457	58126475
1504	chr17	63497150	63497699	+	550	0	63497252	63497452	63497342	63497352	201	4.49181	63497275	3.59731	63497275	48.2592	63497325
1505	chr11	85719850	85720549	+	700	0	85719932	85720097	85720022	85720014	166	4.49165	85720075	3.63318	85720025	65.3896	85720025
1506	chr8	96455550	96456049	+	500	0	96455697	96455792	96455717	96455744	96	4.4916	96455775	3.56559	96455775	36.6489	96455625
1507	chr1	180432800	180433099	+	300	0	180432837	180432977	180432912	180432907	141	4.49156	180432925	3.78312	180432925	43.1919	180432875
1508	chr6	127151600	127152399	+	800	0	127151852	127152212	127151882	127152032	361	4.49125	127151925	3.53582	127151925	87.6983	127151925
1509	chr8	120266150	120267549	+	1400	0	120266247	120266452	120266377	120266349	206	4.49093	120266575	3.60343	120267175	100	120266475
1510	chr12	104983300	104983799	+	500	0	104983702	104983517	104983557	104983609	-184	4.49058	104983425	3.55951	104983475	47.9027	104983425
1511	chr2	165879850	165881299	+	1450	0	165880457	165880642	165880552	165880549	186	4.49054	165880225	3.58681	165880275	100	165880525
1512	chr8	120527700	120529049	+	1350	0	120528452	120528237	120528407	120528344	-214	4.49037	120528675	3.596	120528675	99.1852	120528775
1513	chr17	28158050	28162149	+	4100	0	28161452	28161732	28161527	28161592	281	4.49035	28160275	3.64298	28160275	94.2387	28161475
1514	chr16	30775400	30776699	+	1300	0	30775492	30775617	30775567	30775554	126	4.49031	30775775	3.53194	30775775	100	30775625
1515	chr7	126797450	126798049	+	600	0	126797617	126797742	126797692	126797679	126	4.49027	126797675	3.54141	126797675	92.0975	126797675
1516	chr1	139207800	139208299	+	500	0	139207927	139208267	139208187	139208097	341	4.49022	139207975	3.60096	139207975	41.8602	139208225
1517	chr11	113165450	113165849	+	400	0	113165622	113165752	113165677	113165687	131	4.49009	113165675	3.58738	113165675	100	113165675
1518	chr17	83988700	83989549	+	850	0	83989387	83989482	83989422	83989434	96	4.49007	83988925	3.53772	83988925	93.7468	83989425
1519	chr4	136702550	136703149	+	600	0	136702642	136702817	136702742	136702729	176	4.49004	136702725	3.5401	136702725	74.7957	136702725
1520	chr7	3646550	3647399	+	850	0	3646877	3646917	3646852	3646897	41	4.48979	3646875	3.65186	3646875	72.3823	3646925
1521	chrX	99443100	99443899	+	800	0	99443537	99443542	99443467	99443539	6	4.48977	99443275	3.60575	99443275	37.9456	99443425
1522	chr8	120421000	120422599	+	1600	0	120421642	120421797	120421722	120421719	156	4.48932	120421675	3.54986	120421675	100	120421675
1523	chr7	70347650	70350449	+	2800	0	70349122	70350067	70349117	70349594	946	4.48887	70348925	3.53984	70348925	77.3993	70349075
1524	chr6	91181000	91181599	+	600	0	91181147	91181522	91181222	91181334	376	4.48872	91181375	3.52972	91181375	61.286	91181175
1525	chr7	29316150	29317299	+	1150	0	29316512	29316637	29316597	29316574	126	4.48865	29316525	3.53959	29316525	99.8071	29316625
1526	chr11	20640150	20641249	+	1100	0	20640882	20640492	20640532	20640687	-389	4.48834	20640675	3.52615	20640675	77.6106	20640525
1527	chr17	6595850	6596399	+	550	0	6595977	6596062	6595982	6596019	86	4.48826	6596075	3.52753	6596075	67.215	6596025
1528	chr14	19769650	19770199	+	550	0	19769972	19770067	19769917	19770019	96	4.48823	19769975	3.61963	19769975	77.0632	19769975
1529	chr11	119024350	119025949	+	1600	0	119024742	119025172	119025117	119024957	431	4.48796	119025125	3.61433	119025125	92.4938	119025075
1530	chr2	166290550	166292249	+	1700	0	166291147	166291432	166291312	166291289	286	4.48779	166291325	3.68548	166291325	100	166291275
1531	chr6	72615800	72616199	+	400	0	72615892	72615912	72615967	72615902	21	4.48767	72616075	3.64414	72616075	60.7837	72616025
1532	chr2	33593050	33594549	+	1500	0	33593512	33594147	33594082	33593829	636	4.48756	33593525	3.5257	33593525	100	33593575
1533	chr11	117408450	117409149	+	700	0	117408607	117408577	117408642	117408592	-29	4.48754	117408775	3.55435	117408775	88.6386	117408625
1534	chr6	88342900	88343449	+	550	0	88343012	88343172	88343087	88343092	161	4.48752	88343075	3.62783	88343075	90.5639	88343075
1535	chr14	27049600	27051549	+	1950	0	27051142	27051472	27051432	27051307	331	4.48748	27051175	3.54816	27051175	93.879	27051225
1536	chr1	91455750	91456199	+	450	0	91455897	91456022	91455947	91455959	126	4.48722	91455925	3.56433	91455925	95.3821	91455975
1537	chr4	117651400	117652949	+	1550	0	117651547	117652322	117651707	117651934	776	4.48711	117651725	3.58559	117651775	100	117651675
1538	chr8	46211400	46212099	+	700	0	46211762	46212057	46211972	46211909	296	4.48708	46211575	3.65736	46211575	40.2937	46211925
1539	chr10	117457250	117457649	+	400	0	117457562	117457567	117457492	117457564	6	4.48685	117457475	3.54433	117457475	32.0891	117457475
1540	chr4	134736700	134737849	+	1150	0	134736732	134737672	134736732	134737202	941	4.48677	134736825	3.55544	134736825	58.4027	134736825
1541	chr11	69322050	69322499	+	450	0	69322057	69322247	69322112	69322152	191	4.48665	69322175	3.55323	69322175	37.316	69322125
1542	chr11	68194500	68196899	+	2400	0	68196097	68196242	68196167	68196169	146	4.48647	68196275	3.57989	68196275	100	68196125
1543	chr12	25475000	25475599	+	600	0	25475497	25475387	25475312	25475442	-109	4.4862	25475325	3.62749	25475325	58.9136	25475325
1544	chr8	111732100	111736399	+	4300	0	111733597	111733747	111733672	111733672	151	4.48605	111734675	3.52847	111734675	100	111733675
1545	chr15	77298750	77300349	+	1600	0	77299567	77299847	77299642	77299707	281	4.48562	77299575	3.56909	77299575	100	77299675
1546	chr9	120689900	120691549	+	1650	0	120691002	120691122	120691062	120691062	121	4.4856	120691025	3.54381	120691075	100	120690975
1547	chr8	120490050	120490999	+	950	0	120490092	120490397	120490107	120490244	306	4.4856	120490575	3.53486	120490575	59.0018	120490875
1548	chr6	95017250	95017649	+	400	0	95017377	95017607	95017442	95017492	231	4.4856	95017375	3.71272	95017375	30.3383	95017425
1549	chr1	134062650	134063099	+	450	0	134062872	134063007	134062932	134062939	136	4.48534	134062825	3.55315	134062825	87.4595	134062925
1550	chr17	45806400	45807949	+	1550	0	45807597	45807477	45807467	45807537	-119	4.48471	45807225	3.60799	45807225	100	45807425
1551	chr15	82937900	82938649	+	750	0	82938477	82938502	82938452	82938489	26	4.48463	82938075	3.5822	82938075	100	82938425
1552	chr4	106828500	106830149	+	1650	0	106828612	106829167	106828692	106828889	556	4.48462	106828975	3.52399	106828975	100	106828625
1553	chr7	112686050	112688049	+	2000	0	112686797	112686987	112686872	112686892	191	4.48385	112686425	3.53251	112686425	99.9236	112686875
1554	chr12	112143800	112144749	+	950	0	112144382	112144612	112144457	112144497	231	4.48348	112143975	3.55833	112143975	40.386	112144475
1555	chr7	29259300	29260299	+	1000	0	29259907	29260037	29259877	29259972	131	4.48332	29259875	3.56278	29259875	100	29259875
1556	chr13	63277850	63280449	+	2600	0	63278447	63279337	63279262	63278892	891	4.48311	63278625	3.53229	63278625	93.112	63279325
1557	chr18	80636400	80639149	+	2750	0	80637647	80636807	80637702	80637227	-839	4.48283	80636625	3.61349	80636675	100	80636575
1558	chr11	120822000	120822849	+	850	0	120822232	120822272	120822282	120822252	41	4.48279	120822225	3.66212	120822575	96.9384	120822325
1559	chr17	66412400	66413049	+	650	0	66412597	66412757	66412677	66412677	161	4.48271	66412625	3.54746	66412625	75.0646	66412675
1560	chr19	5690400	5691599	+	1200	0	5690597	5690952	5690672	5690774	356	4.48237	5690775	3.53376	5690775	90.5949	5690825
1561	chr4	130841100	130841799	+	700	0	130841247	130841347	130841322	130841297	101	4.48235	130841425	3.70897	130841425	70.1068	130841325
1562	chr2	73522100	73523399	+	1300	0	73523062	73523277	73523147	73523169	216	4.48231	73523125	3.55703	73523125	100	73523125
1563	chr1	178589950	178590799	+	850	0	178590247	178590387	178590312	178590317	141	4.48123	178590375	3.52009	178590375	71.9501	178590325
1564	chr11	51484500	51486449	+	1950	0	51484717	51485767	51485697	51485242	1051	4.48117	51485725	3.60475	51485725	100	51485675
1565	chr11	76349250	76352149	+	2900	0	76351507	76350612	76350452	76351059	-894	4.48105	76351925	3.54956	76351925	100	76350475
1566	chr11	51502850	51503299	+	450	0	51502942	51502887	51502992	51502914	-54	4.48087	51503125	3.5441	51503125	61.7164	51502975
1567	chr5	113873050	113874049	+	1000	0	113873682	113873897	113873827	113873789	216	4.48055	113873875	3.55612	113873375	100	113873825
1568	chr15	12667750	12668349	+	600	0	12667962	12668072	12667997	12668017	111	4.48053	12667925	3.555	12667925	76.834	12667975
1569	chr17	47887050	47888649	+	1600	0	47888092	47888182	47888107	47888137	91	4.48043	47887525	3.58094	47887525	100	47887425
1570	chr10	37113150	37113649	+	500	0	37113397	37113462	37113467	37113429	66	4.48023	37113425	3.52045	37113425	45.0865	37113425
1571	chr17	30188100	30188949	+	850	0	30188157	30188767	30188622	30188462	611	4.48022	30188625	3.68428	30188625	67.7236	30188175
1572	chr11	68188100	68188899	+	800	0	68188347	68188517	68188412	68188432	171	4.47979	68188425	3.67843	68188425	97.8126	68188475
1573	chr12	108214450	108215399	+	950	0	108215067	108214747	108214782	108214907	-319	4.47975	108215125	3.80049	108215175	46.6786	108214775
1574	chr2	172549150	172549499	+	350	0	172549322	172549487	172549402	172549404	166	4.47968	172549375	3.53389	172549375	78.1899	172549375
1575	chr2	26525300	26527249	+	1950	0	26525382	26526702	26525457	26526042	1321	4.47958	26525525	3.57473	26525525	100	26525475
1576	chr8	87822950	87823599	+	650	0	87823027	87823062	87823102	87823044	36	4.47957	87823275	3.53229	87823275	83.8805	87823125
1577	chr3	108295650	108296799	+	1150	0	108296337	108296562	108296412	108296449	226	4.47955	108296425	3.5532	108296425	93.8563	108296425
1578	chr5	112121600	112121949	+	350	0	112121777	112121767	112121637	112121772	-9	4.47955	112121775	3.68226	112121775	43.8117	112121875
1579	chr10	127196500	127196749	+	250	0	127196572	127196712	127196637	127196642	141	4.47947	127196625	3.61138	127196625	53.9424	127196625
1580	chr2	170547150	170547949	+	800	0	170547342	170547527	170547417	170547434	186	4.47946	170547425	3.58937	170547425	60.8126	170547425
1581	chr2	17730400	17730849	+	450	0	17730692	17730602	17730747	17730647	-89	4.47946	17730525	3.5808	17730525	40.3931	17730725
1582	chr7	135864150	135865099	+	950	0	135864287	135864662	135864367	135864474	376	4.47932	135864325	3.6183	135864325	96.3428	135864375
1583	chr6	52852650	52853249	+	600	0	52852927	52853032	52852962	52852979	106	4.47879	52853025	3.61096	52853025	49.9102	52852975
1584	chr10	39552450	39553399	+	950	0	39552637	39552757	39552682	39552697	121	4.47864	39552675	3.58396	39552675	95.4282	39552675
1585	chr13	53212300	53213249	+	950	0	53212992	53213092	53213067	53213042	101	4.47852	53212675	3.58052	53212675	100	53212925
1586	chr15	76539450	76539999	+	550	0	76539517	76539922	76539847	76539719	406	4.47849	76539575	3.54457	76539575	73.9087	76539625
1587	chr9	107715750	107717699	+	1950	0	107717227	107717397	107717327	107717312	171	4.47817	107717375	3.60559	107717375	100	107717225
1588	chr14	61055550	61055999	+	450	0	61055607	61055992	61055977	61055799	386	4.47796	61055725	3.56438	61055725	40.2135	61055925
1589	chr4	117653650	117655949	+	2300	0	117654212	117655862	117654262	117655037	1651	4.47786	117653825	3.64783	117653825	100	117654325
1590	chr16	17807900	17808349	+	450	0	17808032	17808167	17808107	17808099	136	4.47781	17808175	3.55977	17808175	83.61	17808075
1591	chr14	25724450	25726049	+	1600	0	25725402	25725207	25725482	25725304	-194	4.47745	25725475	3.55187	25725475	100	25725125
1592	chr9	47838100	47839949	+	1850	0	47839647	47839807	47839732	47839727	161	4.47715	47839675	3.52358	47839675	100	47839675
1593	chr7	46742400	46742749	+	350	0	46742562	46742712	46742637	46742637	151	4.47708	46742625	3.57211	46742625	72.3682	46742625
1594	chr2	172925150	172925949	+	800	0	172925607	172925707	172925572	172925657	101	4.47682	172925675	3.5391	172925675	95.2458	172925625
1595	chr5	24344000	24344999	+	1000	0	24344142	24344202	24344202	24344172	61	4.47658	24344575	3.5416	24344575	88.159	24344175
1596	chr19	47450500	47451149	+	650	0	47450857	47450777	47450832	47450817	-79	4.47658	47451025	3.57038	47451025	40.7867	47450725
1597	chr4	140662350	140663549	+	1200	0	140662692	140662887	140662702	140662789	196	4.47554	140662875	3.53751	140662875	91.7685	140662775
1598	chr17	83938250	83940099	+	1850	0	83939607	83939752	83939677	83939679	146	4.47504	83939725	4.18801	83939675	100	83939675
1599	chr7	28946500	28947099	+	600	0	28946867	28946887	28946937	28946877	21	4.47495	28946725	3.55133	28946725	86.3352	28946875
1600	chr5	111554500	111555049	+	550	0	111554802	111554912	111554877	111554857	111	4.47478	111554875	3.57192	111554875	47.7353	111554875
1601	chr11	43565600	43566249	+	650	0	43565917	43565722	43565992	43565819	-194	4.47458	43565875	3.57862	43565875	80.7353	43565975
1602	chr15	102754800	102755949	+	1150	0	102755142	102755292	102755217	102755217	151	4.47456	102755125	3.5864	102755125	92.6982	102755175
1603	chr1	168231150	168231849	+	700	0	168231287	168231792	168231362	168231539	506	4.47434	168231325	3.6624	168231325	46.758	168231375
1604	chr16	21215400	21217099	+	1700	0	21216067	21216247	21216162	21216157	181	4.47425	21216275	3.52464	21216275	98.6637	21216225
1605	chr1	118935700	118936649	+	950	0	118936337	118936452	118936377	118936394	116	4.4735	118936425	3.57649	118936425	99.8777	118936425
1606	chr8	126660950	126661899	+	950	0	126661172	126661262	126661202	126661217	91	4.47345	126661175	3.51657	126661175	96.3922	126661225
1607	chr7	136059100	136060099	+	1000	0	136059687	136059887	136059792	136059787	201	4.47313	136059475	3.58684	136059475	92.4527	136059775
1608	chr3	104790950	104791449	+	500	0	104791002	104791207	104791137	104791104	206	4.4729	104791075	3.57162	104791125	97.3646	104791125
1609	chr2	154922100	154922349	+	250	0	154922322	154922247	154922337	154922284	-74	4.47264	154922175	3.51405	154922175	33.6925	154922275
1610	chr1	191420500	191421199	+	700	0	191420727	191421127	191421047	191420927	401	4.47236	191421025	3.53324	191421025	80.6753	191421075
1611	chr2	18800300	18800649	+	350	0	18800322	18800602	18800452	18800462	281	4.4722	18800475	3.51682	18800475	51.174	18800425
1612	chr6	53398450	53399099	+	650	0	53398547	53398782	53398592	53398664	236	4.47209	53398725	3.52071	53398725	68.8109	53398675
1613	chr17	47974300	47975699	+	1400	0	47974397	47975232	47974432	47974814	836	4.47204	47974625	3.51306	47974625	90.4718	47974525
1614	chr8	121293900	121295249	+	1350	0	121294667	121294907	121294852	121294787	241	4.472	121294775	3.51165	121294775	100	121294725
1615	chr1	73968250	73969849	+	1600	0	73968582	73969147	73969062	73968864	566	4.47166	73969025	3.53489	73969025	100	73968975
1616	chr3	103734000	103735349	+	1350	0	103734867	103734362	103734942	103734614	-504	4.4715	103734275	3.58564	103734275	100	103734275
1617	chr11	113728250	113729349	+	1100	0	113728597	113728872	113728817	113728734	276	4.47146	113728675	3.6546	113728675	100	113728625
1618	chr11	75265000	75266149	+	1150	0	75265637	75265797	75265732	75265717	161	4.47145	75265825	3.5892	75265825	100	75265725
1619	chr5	124112800	124113249	+	450	0	124113002	124113177	124113077	124113089	176	4.47118	124113125	3.68894	124113125	77.3718	124113075
1620	chr3	79743200	79743549	+	350	0	79743207	79743462	79743402	79743334	256	4.47106	79743425	3.51704	79743425	33.53	79743375
1621	chr18	37823600	37824599	+	1000	0	37824227	37824237	37824302	37824232	11	4.47095	37824275	3.55043	37824275	89.0063	37824275
1622	chr7	112389600	112390549	+	950	0	112390172	112389892	112390217	112390032	-279	4.47093	112389775	3.58033	112389825	89.5815	112390225
1623	chr15	77213800	77214699	+	900	0	77214442	77214552	77214477	77214497	111	4.4708	77214025	3.54161	77214025	100	77214475
1624	chr5	149321950	149323499	+	1550	0	149322122	149322162	149322087	149322142	41	4.47058	149322175	3.5502	149322175	94.3413	149322125
1625	chr9	35328500	35330899	+	2400	0	35329027	35330237	35329102	35329632	1211	4.46994	35329425	3.62228	35329025	94.7195	35329075
1626	chr18	35816050	35816549	+	500	0	35816152	35816277	35816227	35816214	126	4.46992	35816225	3.52734	35816225	100	35816175
1627	chr7	19269400	19269749	+	350	0	19269532	19269607	19269607	19269569	76	4.46968	19269525	3.56022	19269525	66.8448	19269575
1628	chr3	101398600	101400499	+	1900	0	101399417	101399252	101399177	101399334	-164	4.46962	101399125	3.60222	101399125	100	101399075
1629	chr12	80270500	80271399	+	900	0	80270932	80271207	80271097	80271069	276	4.46935	80270875	3.55902	80270875	73.7582	80270925
1630	chr18	21298850	21299199	+	350	0	21298937	21298962	21298902	21298949	26	4.46898	21298975	3.5687	21298975	31.9617	21298925
1631	chr8	109465150	109465849	+	700	0	109465337	109465542	109465452	109465439	206	4.46866	109465425	3.527	109465425	79.519	109465475
1632	chr11	4260400	4260999	+	600	0	4260632	4260842	4260732	4260737	211	4.46849	4260625	3.54149	4260625	52.2318	4260725
1633	chr15	80159150	80160149	+	1000	0	80159227	80159287	80159322	80159257	61	4.46847	80159725	3.56082	80159725	57.5044	80159325
1634	chr8	115199650	115199999	+	350	0	115199772	115199807	115199967	115199789	36	4.4679	115199825	3.51567	115199825	34.5359	115199975
1635	chr19	41715850	41717299	+	1450	0	41716647	41716242	41716167	41716444	-404	4.46755	41716325	3.53289	41716325	91.9886	41716225
1636	chr13	109915050	109915449	+	400	0	109915172	109915267	109915217	109915219	96	4.46746	109915325	3.52514	109915325	75.9725	109915225
1637	chr9	35339900	35341349	+	1450	0	35340887	35340907	35340947	35340897	21	4.46699	35340875	3.5173	35340875	94.5174	35340925
1638	chr7	142553800	142555899	+	2100	0	142554532	142554917	142554607	142554724	386	4.46658	142554725	3.54028	142554675	100	142554525
1639	chr18	38172250	38172899	+	650	0	38172302	38172512	38172437	38172407	211	4.46653	38172375	3.62161	38172375	68.0732	38172425
1640	chr11	103649700	103650199	+	500	0	103649892	103649952	103649817	103649922	61	4.46591	103649925	3.66342	103649875	53.5189	103649875
1641	chr7	28694750	28695199	+	450	0	28694772	28695187	28695112	28694979	416	4.46552	28695025	3.534	28695025	57.4109	28695125
1642	chr2	170343550	170346649	+	3100	0	170345597	170345627	170345667	170345612	31	4.46548	170344675	3.61478	170344675	100	170345675
1643	chr4	148918850	148919199	+	350	0	148918952	148918957	148918932	148918954	6	4.46535	148919025	3.52499	148919025	42.3068	148918925
1644	chr18	75479000	75479499	+	500	0	75479092	75479342	75479267	75479217	251	4.46526	75479225	3.51057	75479225	98.4839	75479225
1645	chr7	130288500	130289399	+	900	0	130289047	130288712	130289167	130288879	-334	4.46506	130289025	3.55741	130289025	55.2039	130289125
1646	chr2	36077600	36078049	+	450	0	36077767	36077852	36077777	36077809	86	4.465	36077875	3.69066	36077925	52.783	36077775
1647	chr4	44641600	44642099	+	500	0	44641672	44642067	44641772	44641869	396	4.46487	44641925	3.51831	44641925	64.7894	44641975
1648	chr9	44254050	44254849	+	800	0	44254122	44254302	44254217	44254212	181	4.46471	44254625	3.59804	44254625	64.6424	44254225
1649	chr11	110447700	110449599	+	1900	0	110449007	110448472	110448827	110448739	-534	4.4646	110448375	3.79059	110448375	69.4358	110448375
1650	chr2	59538650	59538999	+	350	0	59538667	59538927	59538742	59538797	261	4.46456	59538825	3.5221	59538825	60.4054	59538775
1651	chr15	97990050	97991999	+	1950	0	97991727	97991032	97990947	97991379	-694	4.46451	97991075	3.50711	97991075	100	97990875
1652	chr9	60940750	60941249	+	500	0	60940752	60940877	60940802	60940814	126	4.46414	60941125	3.59995	60941125	53.9067	60940825
1653	chr2	156842300	156843649	+	1350	0	156842802	156842992	156842877	156842897	191	4.46401	156842925	3.53583	156842925	68.9196	156842875
1654	chr17	25831550	25832249	+	700	0	25831622	25831877	25831797	25831749	256	4.46371	25832075	3.58568	25832075	66.4716	25831775
1655	chr13	51328300	51328649	+	350	0	51328417	51328522	51328512	51328469	106	4.46361	51328525	3.54653	51328475	66.7825	51328475
1656	chr7	83203500	83204749	+	1250	0	83204222	83204187	83204232	83204204	-34	4.46356	83204175	3.54868	83204175	78.6046	83204225
1657	chr9	57638400	57639549	+	1150	0	57638702	57639352	57638787	57639027	651	4.46352	57639275	3.66678	57639225	100	57638775
1658	chr17	11991100	11991449	+	350	0	11991212	11991322	11991282	11991267	111	4.4635	11991325	3.53779	11991325	100	11991225
1659	chr2	34600800	34601749	+	950	0	34601067	34600867	34600827	34600967	-199	4.46336	34601575	3.56759	34601575	44.0891	34600825
1660	chr11	84706750	84708099	+	1350	0	84707882	84708007	84707947	84707944	126	4.46287	84707925	3.56304	84707925	100	84707925
1661	chr15	99650000	99650549	+	550	0	99650302	99650522	99650447	99650412	221	4.46272	99650175	3.51025	99650175	53.3292	99650225
1662	chr8	120832900	120833549	+	650	0	120832992	120833387	120833317	120833189	396	4.4622	120833175	3.51619	120833175	66.9814	120833175
1663	chr1	172202150	172203799	+	1650	0	172202437	172203407	172202472	172202922	971	4.46193	172202525	3.6111	172203325	100	172202475
1664	chr16	92302200	92302949	+	750	0	92302632	92302582	92302507	92302607	-49	4.46162	92302425	3.51994	92302425	59.6917	92302475
1665	chr2	173789850	173790899	+	1050	0	173790382	173790142	173790067	173790262	-239	4.46148	173790225	3.52108	173790225	95.1231	173790075
1666	chr10	80137150	80137649	+	500	0	80137267	80137612	80137342	80137439	346	4.46148	80137425	3.62372	80137425	80.5259	80137325
1667	chr6	127329500	127330099	+	600	0	127329807	127329997	127329917	127329902	191	4.46115	127329925	3.51989	127329925	100	127329925
1668	chr7	74371850	74373049	+	1200	0	74372657	74372817	74372742	74372737	161	4.4611	74372725	3.50329	74372725	67.1036	74372725
1669	chr16	92631850	92632499	+	650	0	92632202	92632382	92632277	92632292	181	4.46105	92632225	3.53753	92632225	96.9459	92632275
1670	chr4	154771900	154773199	+	1300	0	154772717	154772257	154772452	154772487	-459	4.46082	154772575	3.62708	154772575	75.4435	154772475
1671	chr7	112501550	112503949	+	2400	0	112503307	112503537	112503462	112503422	231	4.46079	112502125	3.50906	112502125	90.4788	112503425
1672	chr5	24605600	24606549	+	950	0	24606172	24606497	24606247	24606334	326	4.46064	24605875	3.52159	24605875	94.9704	24606225
1673	chr16	21242850	21244199	+	1350	0	21242882	21243147	21243072	21243014	266	4.46045	21243025	3.54205	21243075	79.5348	21243025
1674	chr8	10922400	10922999	+	600	0	10922747	10922852	10922772	10922799	106	4.46021	10922775	3.64084	10922825	88.9931	10922775
1675	chr6	128010250	128011899	+	1650	0	128011237	128011537	128011312	128011387	301	4.46007	128011075	3.6209	128011075	86.3822	128011225
1676	chr4	125864650	125865599	+	950	0	125864937	125865067	125864997	125865002	131	4.45986	125865025	3.53894	125865025	85.0488	125864975
1677	chr2	141271550	141271799	+	250	0	141271582	141271687	141271657	141271634	106	4.45977	141271675	3.50961	141271625	55.4965	141271675
1678	chr16	90522550	90523649	+	1100	0	90522827	90523242	90522892	90523034	416	4.45962	90522975	3.50553	90522975	68.2263	90522925
1679	chr6	93648700	93648999	+	300	0	93648817	93648702	93648922	93648759	-114	4.45956	93648875	3.56005	93648875	44.1378	93648925
1680	chr8	120297850	120298849	+	1000	0	120298517	120298537	120298567	120298527	21	4.45952	120298425	3.5082	120298425	100	120298425
1681	chr11	60210800	60212599	+	1800	0	60210907	60211417	60211342	60211162	511	4.4589	60210975	3.50842	60210975	88.0568	60210975
1682	chr8	70696750	70697899	+	1150	0	70697037	70697577	70697592	70697307	541	4.45879	70697625	3.51039	70697625	86.2658	70697025
1683	chr8	70892400	70892949	+	550	0	70892487	70892682	70892587	70892584	196	4.45874	70892575	3.59113	70892625	63.021	70892475
1684	chr6	128112100	128112999	+	900	0	128112522	128112802	128112782	128112662	281	4.45817	128112325	3.5137	128112325	71.5004	128112525
1685	chr2	179732400	179733299	+	900	0	179732647	179732842	179732802	179732744	196	4.45784	179733175	3.54326	179733175	50.8913	179732775
1686	chr2	93785300	93786049	+	750	0	93785437	93785452	93785462	93785444	16	4.45756	93785425	3.53772	93785425	71.2728	93785475
1687	chr2	30708100	30709499	+	1400	0	30708462	30708707	30708542	30708584	246	4.45752	30709125	3.56934	30709125	97.0055	30708575
1688	chr2	29250300	29250699	+	400	0	29250302	29250447	29250362	29250374	146	4.45751	29250525	3.54155	29250525	57.2662	29250425
1689	chr17	45874000	45874649	+	650	0	45874082	45874287	45874157	45874184	206	4.4575	45874175	3.54934	45874125	67.1394	45874175
1690	chr2	28370450	28370899	+	450	0	28370472	28370712	28370637	28370592	241	4.45748	28370725	3.50267	28370725	61.2479	28370625
1691	chr4	154593700	154595799	+	2100	0	154595347	154595457	154595407	154595402	111	4.45744	154595275	3.60553	154595275	100	154595375
1692	chr2	75607600	75609199	+	1600	0	75608627	75608842	75608792	75608734	216	4.45729	75608825	3.55889	75608825	79.5088	75608775
1693	chr11	120261000	120262799	+	1800	0	120262332	120261672	120261597	120262002	-659	4.45711	120262575	3.50388	120262575	100	120261625
1694	chr1	59471000	59471449	+	450	0	59471152	59471412	59471332	59471282	261	4.45697	59471125	3.751	59471125	54.7379	59471325
1695	chr4	100864850	100865999	+	1150	0	100865012	100865477	100865157	100865244	466	4.45696	100865125	3.513	100865125	74.9234	100865175
1696	chr13	60125450	60126599	+	1150	0	60125647	60126497	60126427	60126072	851	4.4567	60126425	3.58453	60126425	94.316	60126475
1697	chr4	46353100	46353749	+	650	0	46353422	46353617	46353542	46353519	196	4.45669	46353375	3.51176	46353325	62.9997	46353525
1698	chr2	102154450	102155499	+	1050	0	102154962	102154652	102155022	102154807	-309	4.45659	102154675	3.52616	102154675	46.9399	102155025
1699	chrX	12063300	12063799	+	500	0	12063442	12063482	12063407	12063462	41	4.45629	12063475	3.53349	12063475	53.2978	12063425
1700	chr8	121358600	121360349	+	1750	0	121358982	121359052	121359062	121359017	71	4.45623	121359025	3.54922	121359075	100	121358925
1701	chr17	28007700	28008449	+	750	0	28007882	28008152	28007972	28008017	271	4.45618	28007925	3.52902	28007925	100	28007925
1702	chr18	60734600	60735949	+	1350	0	60735262	60735352	60735337	60735307	91	4.4561	60735775	3.5112	60735775	95.875	60735775
1703	chr11	47377550	47377949	+	400	0	47377582	47377717	47377652	47377649	136	4.45596	47377675	3.53519	47377675	50.2608	47377675
1704	chr18	78431400	78432849	+	1450	0	78432202	78432327	78432257	78432264	126	4.45594	78432225	3.51623	78432225	73.2548	78432275
1705	chr11	99070750	99071749	+	1000	0	99071267	99071502	99071427	99071384	236	4.45521	99071575	3.55494	99071575	100	99071475
1706	chr4	106863000	106864249	+	1250	0	106863497	106863727	106863572	106863612	231	4.45514	106863725	3.50402	106863725	100	106863575
1707	chr2	157895650	157896499	+	850	0	157896087	157896462	157896157	157896274	376	4.45493	157896375	3.50026	157896375	62.1609	157896175
1708	chr1	178566900	178567499	+	600	0	178566907	178567447	178567027	178567177	541	4.45466	178567075	3.59693	178567075	55.0564	178567025
1709	chr17	29244650	29245049	+	400	0	29244812	29245017	29244887	29244914	206	4.45465	29244925	3.66264	29244925	77.3998	29244875
1710	chr19	7185150	7186599	+	1450	0	7186087	7185522	7185447	7185804	-564	4.45465	7186375	3.50098	7186375	99.4007	7186175
1711	chr5	136502000	136503499	+	1500	0	136502692	136502842	136502767	136502767	151	4.45429	136502725	3.50655	136502725	91.8713	136502775
1712	chr8	125139500	125139849	+	350	0	125139567	125139667	125139652	125139617	101	4.45428	125139675	3.51604	125139675	44.1316	125139625
1713	chr13	28793000	28793349	+	350	0	28793052	28793277	28793182	28793164	226	4.45404	28793125	3.59703	28793125	76.7898	28793175
1714	chr6	99103850	99104099	+	250	0	99103932	99104037	99104007	99103984	106	4.45388	99103975	3.71185	99103975	41.7904	99103975
1715	chr7	49882250	49882499	+	250	0	49882252	49882477	49882402	49882364	226	4.45383	49882375	3.54541	49882375	41.9831	49882425
1716	chr5	128581150	128582049	+	900	0	128581582	128581752	128581672	128581667	171	4.45367	128581675	3.50638	128581675	85.6514	128581675
1717	chr2	73509500	73510149	+	650	0	73509592	73509882	73509667	73509737	291	4.45321	73509675	3.53185	73509675	79.9736	73509775
1718	chr6	114781500	114782199	+	700	0	114781787	114781927	114781852	114781857	141	4.45312	114781825	3.68205	114781775	56.5939	114781825
1719	chr17	31384750	31386049	+	1300	0	31385377	31385767	31385452	31385572	391	4.45296	31385575	3.52096	31385575	99.6989	31385475
1720	chr11	120263450	120266099	+	2650	0	120263767	120265067	120264947	120264417	1301	4.45284	120264925	3.60393	120264925	96.3636	120264975
1721	chr4	137481650	137482499	+	850	0	137481807	137482407	137481882	137482107	601	4.45281	137482275	3.49688	137482275	72.1787	137481925
1722	chr8	128397450	128398749	+	1300	0	128397632	128398532	128398437	128398082	901	4.45276	128398475	3.6136	128398475	76.7965	128398475
1723	chr9	87556600	87557149	+	550	0	87556782	87557007	87556887	87556894	226	4.45276	87556825	3.54444	87556825	50.8554	87556975
1724	chr4	137479350	137481049	+	1700	0	137479937	137480442	137480002	137480189	506	4.45245	137480425	3.515	137480425	100	137480025
1725	chr18	84069150	84069849	+	700	0	84069737	84069342	84069812	84069539	-394	4.45192	84069375	3.61894	84069375	63.6736	84069225
1726	chr16	33584100	33585349	+	1250	0	33584487	33584867	33584477	33584677	381	4.4514	33584725	3.52718	33584725	79.4969	33584475
1727	chr5	113632200	113633549	+	1350	0	113632942	113633302	113633102	113633122	361	4.45139	113633175	3.51446	113633175	100	113632975
1728	chr11	70025900	70029199	+	3300	0	70027067	70028262	70027142	70027664	1196	4.45135	70028175	3.49587	70028175	100	70027175
1729	chr11	117441300	117441699	+	400	0	117441492	117441412	117441567	117441452	-79	4.45126	117441525	3.58491	117441525	67.7591	117441575
1730	chr8	26748650	26749049	+	400	0	26748672	26748932	26748847	26748802	261	4.45124	26748925	3.51156	26748875	52.0896	26748875
1731	chr2	93035700	93036349	+	650	0	93035727	93035957	93035887	93035842	231	4.45082	93035925	3.69278	93035925	87.1929	93035875
1732	chr18	25645150	25645949	+	800	0	25645437	25645637	25645512	25645537	201	4.45075	25645775	3.88284	25645775	56.3989	25645725
1733	chr16	62807400	62807799	+	400	0	62807677	62807727	62807657	62807702	51	4.45057	62807625	3.57607	62807625	64.1807	62807675
1734	chr13	51918600	51919399	+	800	0	51918987	51919242	51919067	51919114	256	4.45052	51919175	3.60911	51919175	83.9431	51919075
1735	chr4	143108550	143109249	+	700	0	143109022	143109077	143109007	143109049	56	4.45031	143108975	3.61187	143108975	51.8867	143109025
1736	chr11	97980250	97981249	+	1000	0	97980827	97980952	97980882	97980889	126	4.45019	97980425	3.49413	97980425	95.8387	97980925
1737	chr12	99328650	99331049	+	2400	0	99329567	99329697	99329637	99329632	131	4.45012	99329675	3.58359	99329675	100	99329625
1738	chr7	96650900	96653599	+	2700	0	96651377	96651622	96651462	96651499	246	4.45003	96652775	3.53596	96651475	100	96651425
1739	chr13	31819300	31819699	+	400	0	31819697	31819547	31819472	31819622	-149	4.45	31819475	3.59343	31819475	30.8885	31819475
1740	chr9	72762600	72763249	+	650	0	72763007	72763172	72763097	72763089	166	4.44991	72762775	3.49589	72762775	59.6241	72762775
1741	chr4	120248900	120249649	+	750	0	120249002	120249387	120249077	120249194	386	4.44988	120249425	3.51793	120249425	100	120249025
1742	chr1	167241550	167242749	+	1200	0	167242377	167242547	167242472	167242462	171	4.44931	167242525	3.5719	167242475	100	167242475
1743	chr1	87036150	87036899	+	750	0	87036422	87036512	87036772	87036467	91	4.44913	87036475	3.53993	87036475	87.473	87036475
1744	chr5	125176450	125177649	+	1200	0	125177077	125177167	125177142	125177122	91	4.44913	125177475	3.51447	125177475	93.3899	125177125
1745	chr15	101145700	101146349	+	650	0	101145857	101146207	101146132	101146032	351	4.44904	101146025	3.60665	101146125	59.2891	101146075
1746	chr7	45509050	45509849	+	800	0	45509492	45509757	45509677	45509624	266	4.44895	45509625	3.53472	45509675	80.3909	45509675
1747	chr11	59384050	59385599	+	1550	0	59384492	59385447	59384602	59384969	956	4.44873	59384175	3.50483	59384175	100	59384625
1748	chr14	22813500	22813799	+	300	0	22813552	22813717	22813647	22813634	166	4.44864	22813675	3.51916	22813675	71.6867	22813625
1749	chr4	155840600	155841049	+	450	0	155840877	155840942	155840947	155840909	66	4.4485	155840875	3.50546	155840875	98.1131	155840925
1750	chr2	64075200	64076449	+	1250	0	64076112	64076292	64076187	64076202	181	4.44843	64076175	3.55938	64076175	70.8415	64076175
1751	chr2	118547400	118548049	+	650	0	118547597	118547667	118547602	118547632	71	4.44836	118547575	3.54487	118547575	79.9845	118547625
1752	chr12	99528350	99530099	+	1750	0	99529142	99529497	99529217	99529319	356	4.44829	99529225	3.52194	99529225	60.6367	99529475
1753	chr17	87378000	87380449	+	2450	0	87379812	87378757	87379922	87379284	-1054	4.44826	87379925	3.49885	87379925	100	87378625
1754	chr8	108726300	108727549	+	1250	0	108726962	108727442	108727077	108727202	481	4.44759	108727075	3.52082	108727075	82.8483	108727125
1755	chr2	166031250	166032299	+	1050	0	166031492	166032277	166031597	166031884	786	4.44756	166032125	3.56819	166032125	70.8618	166031625
1756	chr8	108725800	108726199	+	400	0	108726012	108726102	108726087	108726057	91	4.44753	108726025	3.646	108726025	96.4949	108726075
1757	chr2	18933300	18933849	+	550	0	18933647	18933787	18933742	18933717	141	4.44752	18933475	3.55388	18933475	68.4479	18933675
1758	chr11	88583900	88586249	+	2350	0	88585072	88584442	88585162	88584757	-629	4.44752	88585575	3.56074	88585575	88.2633	88584425
1759	chr2	167593500	167595349	+	1850	0	167594422	167594597	167594492	167594509	176	4.44684	167594525	3.60923	167594525	100	167594325
1760	chr4	156193250	156193899	+	650	0	156193272	156193427	156193347	156193349	156	4.44681	156193475	3.65435	156193475	84.8158	156193375
1761	chr15	79327000	79327699	+	700	0	79327147	79327692	79327272	79327419	546	4.44676	79327275	3.51904	79327275	41.899	79327225
1762	chr19	55839450	55840049	+	600	0	55839912	55840022	55840022	55839967	111	4.44673	55839725	3.50488	55839725	40.7713	55839925
1763	chr4	148908750	148909449	+	700	0	148909267	148909417	148909342	148909342	151	4.44668	148909175	3.55075	148909175	100	148909225
1764	chr2	152115250	152115949	+	700	0	152115562	152115437	152115362	152115499	-124	4.44622	152115625	3.57589	152115625	62.2085	152115575
1765	chr16	24205350	24206099	+	750	0	24205557	24205877	24205732	24205717	321	4.44619	24205575	3.52134	24205575	51.6921	24205775
1766	chr19	55813350	55814749	+	1400	0	55814252	55814322	55814262	55814287	71	4.44602	55813675	3.542	55813675	77.0206	55814275
1767	chr15	99343200	99345399	+	2200	0	99344132	99343502	99344207	99343817	-629	4.446	99344375	3.7088	99344325	100	99344175
1768	chr8	48451100	48451449	+	350	0	48451217	48451287	48451172	48451252	71	4.44568	48451275	3.51139	48451275	42.4228	48451125
1769	chr4	129226600	129227049	+	450	0	129226707	129227002	129226697	129226854	296	4.44554	129226875	3.58234	129226875	62.3036	129226775
1770	chr15	59080050	59080499	+	450	0	59080062	59080422	59080352	59080242	361	4.44534	59080375	3.55185	59080375	46.1905	59080375
1771	chr2	75959900	75961149	+	1250	0	75960367	75960537	75960462	75960452	171	4.44533	75960525	3.66664	75960575	82.2602	75960475
1772	chr12	86800450	86802399	+	1950	0	86801577	86801792	86801717	86801684	216	4.44487	86801725	3.4934	86801725	100	86800575
1773	chr2	60037100	60037599	+	500	0	60037402	60037512	60037452	60037457	111	4.44464	60037425	3.50807	60037425	45.7518	60037475
1774	chr6	91720000	91720799	+	800	0	91720482	91720197	91720122	91720339	-284	4.44456	91720475	3.56335	91720475	69.5985	91720675
1775	chr12	33962350	33962599	+	250	0	33962492	33962597	33962522	33962544	106	4.44441	33962475	3.54186	33962475	57.9091	33962525
1776	chr5	119668100	119669249	+	1150	0	119668907	119668962	119668882	119668934	56	4.44424	119668925	3.49423	119668925	78.9123	119668975
1777	chr16	30173650	30174799	+	1150	0	30174052	30174222	30174147	30174137	171	4.44422	30174375	3.50282	30174375	86.677	30174125
1778	chr17	8093350	8093799	+	450	0	8093352	8093582	8093397	8093467	231	4.44375	8093525	3.53948	8093525	56.7251	8093425
1779	chr15	86473400	86474599	+	1200	0	86473927	86474102	86474032	86474014	176	4.44368	86473575	3.52647	86473575	100	86474025
1780	chr11	96298800	96299499	+	700	0	96299262	96298987	96299337	96299124	-274	4.44348	96299325	3.54191	96299325	44.141	96299425
1781	chr17	32182600	32183549	+	950	0	32183207	32183277	32183282	32183242	71	4.44335	32183325	3.49113	32183325	68.9437	32183225
1782	chr7	141443000	141443449	+	450	0	141443047	141443167	141443122	141443107	121	4.44329	141443125	3.49324	141443125	63.2254	141443075
1783	chr17	5234150	5235149	+	1000	0	5234517	5234557	5234597	5234537	41	4.44321	5234575	3.50343	5234575	100	5234475
1784	chr15	78928550	78928849	+	300	0	78928667	78928767	78928737	78928717	101	4.44293	78928725	3.51167	78928725	62.0426	78928725
1785	chr5	29435550	29436099	+	550	0	29435647	29436062	29435722	29435854	416	4.44273	29435675	3.4903	29435675	48.1862	29435725
1786	chr13	28756700	28757699	+	1000	0	28757167	28757232	28757112	28757199	66	4.44273	28757125	3.52709	28757125	92.3741	28757075
1787	chr3	101805300	101805949	+	650	0	101805697	101805782	101805717	101805739	86	4.44255	101805725	3.59849	101805775	76.4015	101805725
1788	chr18	80608400	80609649	+	1250	0	80608867	80608692	80609012	80608779	-174	4.44251	80609025	3.53566	80609025	100	80608975
1789	chr16	29761750	29762449	+	700	0	29761782	29762157	29762082	29761969	376	4.44233	29761875	3.51655	29761875	78.3114	29762025
1790	chr1	91585000	91585749	+	750	0	91585277	91585512	91585352	91585394	236	4.4423	91585325	3.48751	91585325	65.4343	91585375
1791	chr7	143389350	143390099	+	750	0	143389477	143389662	143389552	143389569	186	4.44223	143389475	3.52973	143389475	51.5827	143389575
1792	chr17	24643850	24644799	+	950	0	24644532	24644757	24644657	24644644	226	4.44205	24644625	3.49776	24644675	79.554	24644625
1793	chr19	7113250	7114849	+	1600	0	7113807	7114012	7113932	7113909	206	4.44196	7114025	3.56487	7114125	93.543	7113925
1794	chr12	13079900	13080699	+	800	0	13080252	13080612	13080532	13080432	361	4.44196	13080475	3.50113	13080475	67.0849	13080525
1795	chr2	30440700	30441099	+	400	0	30440777	30440927	30440852	30440852	151	4.44157	30440875	3.56031	30440875	82.9456	30440825
1796	chr2	154932050	154932499	+	450	0	154932342	154932452	154932387	154932397	111	4.44156	154932225	3.48981	154932275	51.6153	154932375
1797	chr11	80300800	80301049	+	250	0	80300937	80300977	80300902	80300957	41	4.44154	80300875	3.58506	80300925	46.7918	80300925
1798	chr5	111806200	111806799	+	600	0	111806282	111806367	111806322	111806324	86	4.4415	111806475	3.53801	111806475	43.025	111806325
1799	chr18	84050950	84051499	+	550	0	84051112	84051267	84051192	84051189	156	4.44147	84051125	3.50224	84051125	90.8209	84051175
1800	chr5	135867800	135868599	+	800	0	135868162	135868317	135868242	135868239	156	4.4414	135868275	3.54482	135868225	67.2535	135868225
1801	chr13	112100100	112100299	+	200	0	112100102	112100212	112100137	112100157	111	4.44138	112100175	3.4919	112100175	30.9007	112100125
1802	chr18	75273600	75274099	+	500	0	75273662	75273812	75273737	75273737	151	4.44123	75273875	3.49978	75273875	48.4837	75273725
1803	chr9	55425150	55425799	+	650	0	55425577	55425777	55425702	55425677	201	4.44122	55425475	3.59927	55425475	54.6704	55425575
1804	chr18	83967450	83967949	+	500	0	83967657	83967897	83967732	83967777	241	4.44114	83967725	3.51733	83967725	68.0208	83967675
1805	chr12	109517000	109517399	+	400	0	109517147	109517202	109517047	109517174	56	4.44094	109517225	3.61813	109517225	60.4761	109517125
1806	chr15	77256300	77257599	+	1300	0	77256557	77256767	77256637	77256662	211	4.44062	77256725	3.57198	77256725	70.4263	77256625
1807	chr6	84409450	84410199	+	750	0	84410037	84409657	84409917	84409847	-379	4.44044	84409975	3.52266	84409925	73.6006	84409975
1808	chr10	25928750	25929599	+	850	0	25928782	25929097	25929102	25928939	316	4.44013	25929075	3.59957	25929075	49.3342	25929075
1809	chr14	55828450	55829149	+	700	0	55828702	55828637	55828777	55828669	-64	4.4399	55828875	3.52397	55828875	61.9093	55828775
1810	chr2	30063700	30064549	+	850	0	30063792	30064042	30063852	30063917	251	4.43947	30063925	3.66844	30063925	60.7849	30063875
1811	chr9	108587000	108587799	+	800	0	108587132	108587317	108587242	108587224	186	4.43923	108587175	3.50609	108587175	79.4373	108587225
1812	chr18	35866250	35866599	+	350	0	35866302	35866587	35866382	35866444	286	4.43916	35866425	3.52877	35866425	49.7731	35866425
1813	chr2	30078400	30078849	+	450	0	30078437	30078587	30078512	30078512	151	4.43912	30078575	3.52906	30078675	70.2924	30078525
1814	chr15	82927400	82930299	+	2900	0	82927867	82928512	82928032	82928189	646	4.43909	82929625	3.50305	82929625	95.2268	82928025
1815	chr2	18040500	18041599	+	1100	0	18040857	18041377	18041302	18041117	521	4.43895	18041375	3.56876	18041375	92.5382	18041325
1816	chr18	61047950	61048499	+	550	0	61048082	61048092	61048022	61048087	11	4.43874	61048375	3.56731	61048375	38.923	61048025
1817	chr9	119980500	119981799	+	1300	0	119980832	119980977	119980902	119980904	146	4.4387	119981275	3.51112	119981275	100	119980775
1818	chr11	116938950	116939799	+	850	0	116939502	116939322	116939317	116939412	-179	4.43856	116939575	3.54132	116939575	71.1394	116939225
1819	chr5	36359500	36360699	+	1200	0	36359752	36360362	36360242	36360057	611	4.4384	36360075	3.48942	36360075	96.6933	36360225
1820	chr13	37482850	37483799	+	950	0	37483147	37483282	37483202	37483214	136	4.4382	37483175	3.52247	37483175	100	37483225
1821	chr12	105563900	105564199	+	300	0	105563907	105564167	105564082	105564037	261	4.43815	105564025	3.50534	105564025	61.8053	105564075
1822	chr2	75353350	75353949	+	600	0	75353712	75353862	75353787	75353787	151	4.43787	75353675	3.4994	75353675	75.1257	75353825
1823	chr2	30716000	30719149	+	3150	0	30716557	30717402	30716597	30716979	846	4.4376	30716575	3.51489	30716575	100	30716575
1824	chr11	120695000	120695599	+	600	0	120695182	120695427	120695342	120695304	246	4.43731	120695225	3.55762	120695325	100	120695275
1825	chr17	13480700	13481249	+	550	0	13480762	13480897	13480837	13480829	136	4.43708	13480975	3.70094	13480975	33.158	13480725
1826	chr11	109714400	109715949	+	1550	0	109714757	109714677	109714812	109714717	-79	4.43703	109715375	3.55036	109715325	64.2814	109715825
1827	chr5	136810250	136810899	+	650	0	136810522	136810462	136810467	136810492	-59	4.43682	136810525	3.58998	136810525	70.7277	136810575
1828	chr7	44335800	44336099	+	300	0	44335897	44336017	44335942	44335957	121	4.4365	44335925	3.51073	44335925	34.846	44335925
1829	chr3	96559400	96559949	+	550	0	96559732	96559702	96559722	96559717	-29	4.43626	96559775	3.51803	96559775	38.5478	96559675
1830	chr10	77190750	77191949	+	1200	0	77191002	77191532	77191462	77191267	531	4.43623	77191225	3.58122	77191625	90.4788	77191475
1831	chr4	150807500	150808849	+	1350	0	150807932	150808082	150808007	150808007	151	4.4362	150807925	3.57452	150807925	100	150808025
1832	chr5	35900150	35901699	+	1550	0	35900922	35900232	35901032	35900577	-689	4.43619	35900925	3.5196	35901025	78.1694	35901025
1833	chr9	58111950	58113899	+	1950	0	58112557	58112182	58112327	58112369	-374	4.43615	58113625	3.48835	58113625	76.4161	58112225
1834	chr17	83890250	83891249	+	1000	0	83890257	83890722	83890647	83890489	466	4.43614	83890975	3.49034	83891025	100	83890725
1835	chr14	55762100	55762399	+	300	0	55762167	55762377	55762327	55762272	211	4.4361	55762275	3.48699	55762275	38.728	55762275
1836	chr13	53177250	53178699	+	1450	0	53178087	53178337	53178202	53178212	251	4.43596	53178175	3.55129	53178125	100	53178125
1837	chr1	182280600	182281699	+	1100	0	182281207	182281492	182281282	182281349	286	4.43593	182281325	3.53551	182281325	72.7406	182281275
1838	chr7	98843200	98844299	+	1100	0	98844047	98844077	98843942	98844062	31	4.43587	98843575	3.51992	98843575	100	98843875
1839	chr13	109259000	109259399	+	400	0	109259162	109259247	109259172	109259204	86	4.43547	109259225	3.494	109259225	55.6755	109259175
1840	chr14	9633600	9633899	+	300	0	9633812	9633632	9633882	9633722	-179	4.43529	9633775	3.50131	9633775	34.395	9633875
1841	chr2	181487050	181488399	+	1350	0	181487192	181487692	181487267	181487442	501	4.43519	181487375	3.48258	181487375	91.3315	181487375
1842	chr16	29734650	29735049	+	400	0	29734967	29734872	29734982	29734919	-94	4.4348	29734875	3.48414	29734875	44.075	29734825
1843	chr15	101075300	101076699	+	1400	0	101076057	101076212	101076132	101076134	156	4.43476	101076025	3.51085	101076025	100	101076125
1844	chr14	70054950	70055799	+	850	0	70055427	70055362	70055147	70055394	-64	4.43453	70055175	3.49119	70055175	86.1167	70055125
1845	chr11	32363300	32364399	+	1100	0	32363937	32364282	32364002	32364109	346	4.43438	32364225	3.48574	32364225	65.1513	32364025
1846	chr12	3811700	3812349	+	650	0	3811782	3811982	3811857	3811882	201	4.43409	3811975	3.49149	3811975	90.718	3811875
1847	chr4	127168600	127169349	+	750	0	127168837	127168652	127168907	127168744	-184	4.43406	127168925	3.49931	127168925	42.7988	127168625
1848	chr7	29291700	29292849	+	1150	0	29292332	29292412	29292347	29292372	81	4.43391	29292275	3.5212	29292325	100	29292225
1849	chr2	75171850	75172099	+	250	0	75171947	75172097	75172022	75172022	151	4.43373	75171975	3.56148	75171975	47.3349	75172025
1850	chr1	192800100	192800749	+	650	0	192800107	192800557	192800522	192800332	451	4.43352	192800575	3.51899	192800575	63.2729	192800525
1851	chr2	160350950	160351599	+	650	0	160351277	160351467	160351352	160351372	191	4.4334	160351425	3.50505	160351425	100	160351375
1852	chr13	53231700	53232699	+	1000	0	53232557	53232672	53232597	53232614	116	4.43318	53231975	3.61069	53231975	82.4289	53232575
1853	chr15	83223200	83223649	+	450	0	83223357	83223372	83223317	83223364	16	4.43302	83223475	3.64902	83223475	100	83223425
1854	chr7	29293000	29293699	+	700	0	29293222	29293297	29293237	29293259	76	4.43289	29293575	3.56506	29293525	84.5167	29293525
1855	chr6	100162750	100164099	+	1350	0	100162912	100163502	100162992	100163207	591	4.43264	100162975	3.53992	100162975	100	100162975
1856	chr9	83145500	83145899	+	400	0	83145607	83145702	83145687	83145654	96	4.43262	83145775	3.53518	83145825	65.9045	83145775
1857	chr14	60409750	60410149	+	400	0	60409967	60410002	60410037	60409984	36	4.43245	60409925	3.62052	60409975	61.7591	60409975
1858	chr10	39614500	39615049	+	550	0	39614617	39614822	39614692	39614719	206	4.43224	39614675	3.50413	39614675	84.6082	39614725
1859	chr17	46126550	46127049	+	500	0	46126607	46126932	46126742	46126769	326	4.4322	46126775	3.50172	46126775	54.3202	46126725
1860	chr1	187803900	187804349	+	450	0	187804097	187804202	187804172	187804149	106	4.43202	187804075	3.50099	187804075	84.7143	187804175
1861	chr6	115985900	115987549	+	1650	0	115986812	115986867	115986882	115986839	56	4.43191	115986625	3.59758	115986575	76.0594	115986675
1862	chr12	79660750	79662099	+	1350	0	79661392	79661472	79661432	79661432	81	4.43179	79661425	3.48245	79661425	92.0666	79661425
1863	chr6	92004000	92004749	+	750	0	92004077	92004727	92004622	92004402	651	4.43171	92004175	3.57669	92004175	51.9436	92004575
1864	chr2	79004400	79004949	+	550	0	79004692	79004662	79004587	79004677	-29	4.43167	79004625	3.56444	79004625	68.6883	79004725
1865	chr5	66527050	66528049	+	1000	0	66527277	66527582	66527552	66527429	306	4.43165	66527425	3.51467	66527425	72.4295	66527525
1866	chr7	96672300	96672649	+	350	0	96672502	96672567	96672492	96672534	66	4.43146	96672475	3.50097	96672475	40.5219	96672525
1867	chr8	65035450	65035799	+	350	0	65035507	65035712	65035582	65035609	206	4.43127	65035625	3.54187	65035625	25.3517	65035625
1868	chr2	118529050	118531449	+	2400	0	118529502	118529852	118529562	118529677	351	4.4312	118529525	3.57462	118529625	100	118529425
1869	chr6	52177900	52178349	+	450	0	52178117	52177922	52178122	52178019	-194	4.43113	52178175	3.54495	52178175	47.3273	52178075
1870	chr4	137917550	137918049	+	500	0	137917832	137917762	137917692	137917797	-69	4.43075	137917725	3.58993	137917725	48.664	137917675
1871	chr5	111138400	111140249	+	1850	0	111138907	111139102	111139032	111139004	196	4.43074	111139325	3.54268	111139325	100	111138975
1872	chr19	6502100	6502549	+	450	0	6502132	6502377	6502207	6502254	246	4.43072	6502425	3.534	6502425	46.7359	6502225
1873	chr2	63962950	63963599	+	650	0	63963132	63963217	63963197	63963174	86	4.43048	63963125	3.5011	63963125	61.0176	63963175
1874	chr5	92905200	92906099	+	900	0	92905747	92905627	92905837	92905687	-119	4.43041	92905825	3.5685	92905925	91.678	92905825
1875	chr15	12545150	12545899	+	750	0	12545462	12545247	12545162	12545354	-214	4.43024	12545775	3.64854	12545775	79.9988	12545525
1876	chr11	106313350	106314949	+	1600	0	106314442	106314557	106314502	106314499	116	4.43021	106313575	3.57198	106313575	100	106314575
1877	chr8	122517000	122518449	+	1450	0	122517737	122517897	122517822	122517817	161	4.43014	122517825	3.51739	122517875	98.1618	122517825
1878	chr8	25545200	25545999	+	800	0	25545622	25545802	25545732	25545712	181	4.4299	25545325	3.48408	25545325	91.9005	25545675
1879	chr1	74898550	74899049	+	500	0	74898767	74898752	74898757	74898759	-14	4.42971	74898875	3.83098	74898725	75.1545	74898775
1880	chr2	14825000	14825449	+	450	0	14825192	14825447	14825377	14825319	256	4.42969	14825325	3.48206	14825325	35.6263	14825325
1881	chr2	75462100	75462449	+	350	0	75462202	75462367	75462292	75462284	166	4.42959	75462325	3.56723	75462325	88.3146	75462275
1882	chr10	77131050	77132849	+	1800	0	77132342	77132397	77132407	77132369	56	4.42886	77131975	3.49939	77131975	100	77132375
1883	chr5	111227450	111229449	+	2000	0	111227747	111227852	111227782	111227799	106	4.42884	111228275	3.63586	111228275	100	111227775
1884	chr5	114356850	114357249	+	400	0	114356992	114357177	114357077	114357084	186	4.42864	114357025	3.5644	114357025	38.5582	114357075
1885	chr5	136117400	136117999	+	600	0	136117567	136117772	136117682	136117669	206	4.42836	136117625	3.49694	136117625	81.499	136117675
1886	chr19	28677800	28678199	+	400	0	28677922	28678007	28677932	28677964	86	4.42832	28677975	3.72631	28677975	36.4817	28677975
1887	chr8	25368100	25368849	+	750	0	25368532	25368697	25368622	25368614	166	4.42831	25368575	3.51257	25368625	100	25368525
1888	chr8	70598500	70600999	+	2500	0	70600747	70600497	70600422	70600622	-249	4.4283	70600025	3.49749	70600375	100	70600325
1889	chr2	170206400	170206699	+	300	0	170206512	170206567	170206542	170206539	56	4.42818	170206575	3.51485	170206575	73.5167	170206575
1890	chr9	43993900	43994349	+	450	0	43993982	43994217	43994132	43994099	236	4.42816	43994175	3.48533	43994175	78.1125	43994125
1891	chr5	141239800	141240299	+	500	0	141239832	141239962	141239872	141239897	131	4.42777	141239975	3.54648	141240025	85.5513	141239925
1892	chr11	99143700	99144199	+	500	0	99143957	99144067	99144032	99144012	111	4.42746	99143875	3.50119	99143875	75.536	99143975
1893	chr9	21544800	21545099	+	300	0	21544827	21544917	21544882	21544872	91	4.42702	21544925	3.4835	21544925	20.7782	21544825
1894	chr11	61016900	61017549	+	650	0	61017192	61017152	61017082	61017172	-39	4.42686	61017075	3.48327	61017075	86.1039	61017125
1895	chr2	27078150	27080449	+	2300	0	27079572	27079707	27079647	27079639	136	4.42679	27080225	3.91587	27080175	100	27079625
1896	chr17	46287800	46288099	+	300	0	46287867	46288042	46287942	46287954	176	4.42678	46287975	3.61407	46287925	59.3276	46287925
1897	chr1	74295300	74296349	+	1050	0	74295362	74295612	74295512	74295487	251	4.42665	74296025	3.47695	74296025	90.2684	74295525
1898	chr3	105495350	105495649	+	300	0	105495392	105495617	105495542	105495504	226	4.42597	105495475	3.48178	105495475	50.8822	105495525
1899	chr7	136007650	136008299	+	650	0	136007827	136008262	136007922	136008044	436	4.42593	136007875	3.48106	136007825	53.0771	136007925
1900	chrX	99549550	99549949	+	400	0	99549682	99549772	99549772	99549727	91	4.42584	99549825	3.6297	99549825	61.908	99549775
1901	chr13	30250100	30250499	+	400	0	30250302	30250352	30250282	30250327	51	4.42563	30250275	3.48688	30250275	100	30250275
1902	chr3	8716450	8717249	+	800	0	8716692	8716842	8716767	8716767	151	4.42549	8716825	3.50836	8716825	100	8716775
1903	chr7	137248750	137249849	+	1100	0	137249492	137249602	137249522	137249547	111	4.42548	137249075	3.47756	137249075	84.9548	137249575
1904	chr17	34038450	34039499	+	1050	0	34039147	34039152	34039172	34039149	6	4.42532	34038625	3.50452	34038625	67.1357	34039125
1905	chr2	33219550	33220799	+	1250	0	33220252	33220207	33220132	33220229	-44	4.42512	33220425	3.528	33220425	86.0021	33220125
1906	chr4	139810750	139811699	+	950	0	139810867	139811282	139810952	139811074	416	4.42508	139810925	3.5791	139810975	59.98	139810975
1907	chr11	101896500	101897549	+	1050	0	101896777	101897092	101896847	101896934	316	4.42507	101896875	3.52878	101896875	100	101896775
1908	chr2	30545350	30546049	+	700	0	30545817	30545712	30545872	30545764	-104	4.42498	30545625	3.58896	30545625	66.0395	30545575
1909	chr10	81601250	81601999	+	750	0	81601427	81601907	81601777	81601667	481	4.42491	81601725	3.52383	81601725	90.1402	81601775
1910	chr11	96985100	96985949	+	850	0	96985352	96985292	96985412	96985322	-59	4.4246	96985275	3.57562	96985275	63.1416	96985375
1911	chr6	126134900	126135299	+	400	0	126135072	126135222	126135147	126135147	151	4.42437	126135175	3.52109	126135175	39.0161	126135125
1912	chr13	63171650	63172249	+	600	0	63171867	63172097	63172012	63171982	231	4.42429	63172075	3.51079	63172075	100	63171925
1913	chr5	28460450	28461099	+	650	0	28460517	28460992	28460647	28460754	476	4.42424	28460575	3.48975	28460575	27.9286	28460625
1914	chr10	39556000	39556499	+	500	0	39556192	39556427	39556352	39556309	236	4.42387	39556275	3.65472	39556175	58.3055	39556325
1915	chr4	131918050	131918749	+	700	0	131918332	131918392	131918407	131918362	61	4.42386	131918175	3.48967	131918175	78.3859	131918575
1916	chr9	118689150	118689899	+	750	0	118689657	118689512	118689732	118689584	-144	4.42348	118689475	3.49947	118689475	100	118689675
1917	chr19	47320000	47321049	+	1050	0	47320142	47320242	47320162	47320192	101	4.42342	47320825	3.65852	47320825	100	47320125
1918	chr7	125886550	125887349	+	800	0	125886852	125887102	125886887	125886977	251	4.42331	125886975	3.5093	125886975	87.6551	125886925
1919	chr5	137733850	137735249	+	1400	0	137734822	137734392	137734937	137734607	-429	4.42303	137734625	3.49156	137734625	71.6954	137734925
1920	chr1	89823350	89824149	+	800	0	89823602	89823707	89823677	89823654	106	4.423	89823925	3.48787	89823925	100	89823625
1921	chr18	35832950	35833649	+	700	0	35833082	35833557	35833187	35833319	476	4.42286	35833175	3.48526	35833175	100	35833175
1922	chr4	148306600	148307349	+	750	0	148306882	148307022	148306947	148306952	141	4.42255	148306975	3.4918	148306975	100	148306875
1923	chr9	114548450	114549449	+	1000	0	114548562	114548642	114548642	114548602	81	4.42254	114548675	3.47109	114548675	100	114548625
1924	chr4	117997300	117998199	+	900	0	117997817	117997752	117997892	117997784	-64	4.42232	117997675	3.69639	117997675	67.7236	117997875
1925	chr7	99353450	99353849	+	400	0	99353497	99353757	99353662	99353627	261	4.42228	99353625	3.47763	99353625	48.0923	99353575
1926	chr14	25015150	25016549	+	1400	0	25015992	25016477	25015392	25016234	486	4.42227	25016325	3.48896	25016325	100	25016375
1927	chr5	114370550	114371799	+	1250	0	114370752	114371207	114370947	114370979	456	4.42198	114370925	3.47864	114370925	100	114370825
1928	chr5	93131750	93132199	+	450	0	93132082	93132167	93132152	93132124	86	4.42153	93131975	3.57486	93131975	53.0058	93132075
1929	chr11	69835500	69836349	+	850	0	69835507	69836037	69835967	69835772	531	4.42143	69836025	3.47578	69836025	77.4688	69835975
1930	chr2	165856650	165859999	+	3350	0	165858022	165858092	165858107	165858057	71	4.42131	165858425	3.4712	165858425	100	165857925
1931	chr1	89547350	89548149	+	800	0	89548012	89548062	89548107	89548037	51	4.42122	89547625	3.60166	89547625	74.9385	89547775
1932	chr3	51750500	51750699	+	200	0	51750517	51750532	51750502	51750524	16	4.42106	51750625	3.49294	51750625	35.5156	51750525
1933	chr2	153436000	153437999	+	2000	0	153437052	153437232	153437157	153437142	181	4.42101	153436175	3.50409	153436175	100	153437125
1934	chr4	131485000	131485849	+	850	0	131485207	131485382	131485362	131485294	176	4.42088	131485575	3.52174	131485575	77.8146	131485375
1935	chr7	29320700	29321049	+	350	0	29320812	29320977	29320902	29320894	166	4.42074	29320875	3.56555	29320875	89.3373	29320925
1936	chr7	66046850	66048099	+	1250	0	66047192	66047757	66047267	66047474	566	4.42059	66047675	3.4873	66047675	72.7438	66047575
1937	chr16	18554400	18556099	+	1700	0	18554587	18555352	18555252	18554969	766	4.42057	18555025	3.62353	18555075	100	18555025
1938	chr12	86158800	86159149	+	350	0	86158802	86159107	86158992	86158954	306	4.42041	86159025	3.51022	86159025	58.3533	86158975
1939	chr11	68591450	68592049	+	600	0	68591512	68591912	68591732	68591712	401	4.4204	68591775	3.48036	68591775	48.0512	68591625
1940	chr19	32343900	32344399	+	500	0	32344092	32344337	32344252	32344214	246	4.4203	32344275	3.51898	32344275	54.5879	32344275
1941	chr4	108431600	108432499	+	900	0	108431667	108432002	108431927	108431834	336	4.42013	108431975	3.70375	108431925	100	108431775
1942	chr9	76234750	76235399	+	650	0	76234767	76235242	76234842	76235004	476	4.41964	76234875	3.5291	76234875	54.9672	76234875
1943	chr12	80059900	80060349	+	450	0	80059947	80060057	80059987	80060002	111	4.4196	80060025	3.51082	80060025	56.7404	80060025
1944	chr6	72188600	72189849	+	1250	0	72189287	72189832	72189362	72189559	546	4.41949	72189675	3.47987	72189675	81.6357	72189325
1945	chr15	99724450	99725099	+	650	0	99724662	99724637	99724827	99724649	-24	4.41938	99724925	3.58671	99724925	65.4122	99724875
1946	chr8	114635350	114635849	+	500	0	114635352	114635562	114635427	114635457	211	4.41923	114635625	3.6198	114635625	62.6763	114635475
1947	chr7	96775350	96776099	+	750	0	96775467	96775832	96775527	96775649	366	4.41913	96775525	3.48519	96775525	94.0879	96775525
1948	chr4	130174100	130174999	+	900	0	130174657	130174767	130174712	130174712	111	4.41905	130174725	3.47173	130174725	77.3993	130174725
1949	chr9	37121550	37122149	+	600	0	37121767	37121867	37121792	37121817	101	4.4189	37121725	3.52586	37121725	64.1533	37121825
1950	chr4	154566650	154567549	+	900	0	154567087	154567472	154567362	154567279	386	4.41883	154567325	3.55413	154567325	79.6789	154567375
1951	chr11	88695150	88696749	+	1600	0	88696177	88696242	88696287	88696209	66	4.41882	88695425	3.69621	88695475	79.6517	88696175
1952	chr11	102445900	102446849	+	950	0	102446217	102446282	102446307	102446249	66	4.41881	102446125	3.63945	102446125	87.4595	102446325
1953	chr7	25152950	25154249	+	1300	0	25153957	25153557	25154032	25153757	-399	4.41873	25153925	3.59037	25153925	92.3862	25153975
1954	chr10	86331500	86331849	+	350	0	86331637	86331707	86331707	86331672	71	4.41868	86331675	3.5279	86331675	48.5227	86331675
1955	chr9	64569150	64569499	+	350	0	64569342	64569457	64569397	64569399	116	4.41867	64569375	3.46862	64569375	68.2379	64569375
1956	chr19	55662900	55663299	+	400	0	55663027	55663167	55663102	55663097	141	4.41846	55663025	3.50528	55663025	71.4009	55663125
1957	chr2	73493200	73493449	+	250	0	73493442	73493402	73493327	73493422	-39	4.41836	73493325	3.47589	73493325	40.4739	73493325
1958	chr1	194679850	194680549	+	700	0	194679982	194680392	194680042	194680187	411	4.41815	194680325	3.56977	194680325	64.2365	194680325
1959	chr10	128037200	128037549	+	350	0	128037282	128037547	128037432	128037414	266	4.4181	128037425	3.53652	128037325	32.1154	128037375
1960	chr9	65167750	65169049	+	1300	0	65168742	65168732	65168772	65168737	-9	4.41801	65167925	3.56955	65167925	63.3652	65168875
1961	chr10	39659250	39659899	+	650	0	39659542	39659492	39659557	39659517	-49	4.41777	39659475	3.47693	39659475	85.6076	39659525
1962	chr11	35383850	35385349	+	1500	0	35383967	35384487	35384047	35384227	521	4.41776	35384375	3.47018	35384375	95.5596	35385275
1963	chr10	59880650	59881049	+	400	0	59880767	59881027	59880847	59880897	261	4.41758	59880825	3.50398	59880825	26.0998	59880875
1964	chr17	25604750	25605249	+	500	0	25604922	25605032	25604962	25604977	111	4.41712	25604975	3.49937	25604975	98.2363	25604975
1965	chr7	36707750	36709049	+	1300	0	36708372	36708587	36708477	36708479	216	4.41709	36708475	3.51503	36708475	85.1522	36708425
1966	chr9	32539200	32539849	+	650	0	32539337	32539482	32539407	32539409	146	4.417	32539375	3.49182	32539375	66.2015	32539425
1967	chr14	28451650	28451999	+	350	0	28451932	28451937	28451862	28451934	6	4.41642	28451825	3.50036	28451825	51.4505	28451825
1968	chr15	77927800	77928149	+	350	0	77927872	77927942	77927912	77927907	71	4.41636	77927975	3.48515	77927975	70.9818	77927875
1969	chr10	125948950	125949399	+	450	0	125949262	125949312	125949287	125949287	51	4.41634	125949225	3.47869	125949275	45.9622	125949325
1970	chr10	85510350	85510799	+	450	0	85510667	85510722	85510667	85510694	56	4.41622	85510625	3.48424	85510625	56.7378	85510625
1971	chr10	99285400	99285949	+	550	0	99285532	99285657	99285577	99285594	126	4.41622	99285525	3.53397	99285525	43.6694	99285875
1972	chr4	134751700	134752399	+	700	0	134752167	134752042	134752082	134752104	-124	4.416	134751825	3.5064	134751825	87.3783	134752025
1973	chr18	38512500	38513099	+	600	0	38512802	38512927	38512877	38512864	126	4.41579	38512825	3.4748	38512825	64.2345	38512925
1974	chr16	91745650	91746149	+	500	0	91746147	91745702	91745667	91745924	-444	4.41568	91745925	3.49214	91745925	43.5264	91745675
1975	chr13	49188000	49188499	+	500	0	49188312	49188487	49188407	49188399	176	4.41563	49188275	3.47322	49188275	66.7756	49188375
1976	chr16	30873450	30873749	+	300	0	30873502	30873632	30873577	30873567	131	4.41555	30873625	3.5985	30873625	46.7537	30873575
1977	chr8	120516050	120516849	+	800	0	120516692	120516537	120516797	120516614	-154	4.41541	120516575	3.48766	120516625	85.3325	120516475
1978	chr16	95793850	95794649	+	800	0	95794092	95794217	95794142	95794154	126	4.4154	95794325	3.69808	95794325	64.3865	95794075
1979	chr2	167596100	167596699	+	600	0	167596507	167596572	167596507	167596539	66	4.41518	167596375	3.48148	167596375	100	167596475
1980	chr7	28586950	28588249	+	1300	0	28587957	28588072	28588012	28588014	116	4.41516	28588075	3.47481	28588075	92.7545	28588075
1981	chr17	29398350	29399949	+	1600	0	29399012	29399742	29399072	29399377	731	4.41509	29399425	3.61691	29399425	83.8731	29399125
1982	chr11	111088800	111089299	+	500	0	111089122	111089017	111089172	111089069	-104	4.41503	111088925	3.48762	111088925	44.5594	111089175
1983	chr13	40716850	40717349	+	500	0	40716892	40717242	40716967	40717067	351	4.41499	40717025	3.57475	40717025	89.6245	40717025
1984	chr8	120351850	120353249	+	1400	0	120352552	120352647	120352632	120352599	96	4.41492	120352825	3.59786	120352075	100	120352575
1985	chr9	55067400	55068549	+	1150	0	55067622	55067792	55067712	55067707	171	4.41485	55067625	3.73248	55067625	95.7806	55067725
1986	chr15	77255350	77256049	+	700	0	77255632	77255722	77255647	77255677	91	4.41455	77255625	3.54968	77255625	92.5447	77255675
1987	chr14	25561850	25562299	+	450	0	25561932	25562067	25561992	25561999	136	4.41438	25562075	3.53737	25562075	57.6499	25562025
1988	chr2	119304700	119305149	+	450	0	119304712	119305087	119304802	119304899	376	4.41437	119305025	3.5571	119305025	55.844	119305025
1989	chr2	167233700	167234549	+	850	0	167233992	167234372	167233782	167234182	381	4.41418	167233775	3.52886	167233775	62.0051	167233825
1990	chr3	104794850	104795299	+	450	0	104795047	104795187	104795112	104795117	141	4.41418	104795075	3.49188	104795075	67.4605	104795125
1991	chr16	21238350	21240149	+	1800	0	21239312	21238842	21238777	21239077	-469	4.41367	21239725	3.5639	21239725	87.891	21239275
1992	chr12	8817650	8818449	+	800	0	8818047	8818312	8818197	8818179	266	4.41361	8818125	3.60253	8818125	88.8258	8818125
1993	chr16	92644450	92645199	+	750	0	92644712	92644812	92644782	92644762	101	4.41354	92644825	3.55483	92644825	83.4284	92644825
1994	chr9	84072600	84072999	+	400	0	84072602	84072742	84072672	84072672	141	4.41352	84072825	3.49876	84072825	26.8438	84072675
1995	chr1	75374800	75375999	+	1200	0	75375417	75375637	75375517	75375527	221	4.41343	75375625	3.52093	75375625	100	75375425
1996	chr2	157133950	157134199	+	250	0	157133957	157134117	157133972	157134037	161	4.41291	157134075	3.49435	157134075	16.932	157134025
1997	chr10	80160250	80161849	+	1600	0	80160797	80161027	80161162	80160912	231	4.41273	80160925	3.52871	80160925	100	80160875
1998	chr1	132333500	132334449	+	950	0	132333692	132333862	132333767	132333777	171	4.41258	132333725	3.53058	132333675	100	132333725
1999	chr4	134307250	134307799	+	550	0	134307462	134307737	134307662	134307599	276	4.4125	134307475	3.52056	134307475	65.4877	134307625
2000	chr9	58489550	58490349	+	800	0	58489622	58490127	58490057	58489874	506	4.41236	58490125	3.48699	58490125	100	58490075
[truncated: 68,979 more rows]
