# Supplementary material for: GLI transcriptional repression regulates tissue-specific enhancer activity in response to Hedgehog signaling
Source: eLife. 2020 Jan 28;9:e50670. doi: 10.7554/eLife.50670 (PMC6986877; doi:10.7554/eLife.50670)
Supplement: Figure 2—source data 1. — H3K27me3 called peaks with a FDR < 0.05 from two replicates of Shh-/- E10.5 forelimbs. For each peak, the assigned Peak ID, coordinates, log2 fold change normalized signal to input. Additional tab includes H3K27me3 peaks that overlap with GLI3 binding regions; the GBR sub-classifications are specified. [file elife-50670-fig2-data1.xlsx]

## Sheet: H3K27me3_SHH
Peak_ID	Chromosome	Start	End	Log2FC_input
60037	chr17	56199800	56200249	6.0046
60038	chr19	45738300	45746449	5.64843
60039	chr9	63139450	63151149	5.66634
60040	chr4	46338750	46350149	5.60704
60041	chr15	99221900	99227349	5.56691
60042	chr10	127079200	127083149	5.57496
60043	chr2	147080950	147088699	5.56803
60044	chr11	119546000	119550799	5.6372
60045	chr1	119418850	119423599	5.53398
60046	chr5	41751250	41764549	5.46726
60047	chr17	4626050	4626699	5.30245
60048	chr13	31806800	31813999	5.4286
60049	chr11	98325300	98330349	5.60605
60050	chr7	44351550	44355849	5.41859
60051	chr10	80491850	80499499	5.42502
60052	chr6	132463550	132463999	5.22088
60053	chr4	152119350	152122799	5.34484
60054	chr4	124657700	124661349	5.40601
60055	chr15	76515850	76522299	5.45071
60056	chr8	121728450	121732799	5.44455
60057	chr16	18580450	18592249	5.40166
60058	chr4	114905850	114908999	5.3866
60059	chr15	102921100	102924299	5.34631
60060	chr5	107718650	107728449	5.46108
60061	chr8	121116100	121123349	5.37573
60062	chr5	33429100	33437749	5.41796
60063	chr11	102944250	102946749	5.42146
60064	chr19	54045300	54048799	5.42335
60065	chr15	98788600	98794699	5.38762
60066	chr19	45140950	45161099	5.42973
60067	chr19	44754750	44763399	5.17837
60068	chr11	82929200	82934399	5.27684
60069	chr8	121125750	121129849	5.33561
60070	chr12	8296650	8303299	5.34906
60071	chr3	17792400	17797649	5.25331
60072	chr5	139542150	139548399	5.33207
60073	chr1	9966300	9969149	5.25416
60074	chr4	120266550	120270299	5.36036
60075	chr7	45832100	45835149	5.1563
60076	chr5	125531100	125535499	5.0798
60077	chr4	21684250	21691049	5.18512
60078	chr2	31633800	31643849	5.1897
60079	chr2	10368450	10372249	5.0826
60080	chr18	35651950	35655849	5.16745
60081	chr8	84701500	84709149	5.25941
60082	chr18	76853400	76862149	5.14252
60083	chr8	12395500	12403749	5.13733
60084	chr19	45221550	45239749	5.13891
60085	chr12	110186700	110190199	5.28016
60086	chr11	66524100	66527799	5.07243
60087	chr2	25576600	25580749	5.10908
60088	chr2	119742350	119745399	5.23102
60089	chr9	58196050	58201699	5.21503
60090	chr7	45405350	45408399	5.08725
60091	chr15	98804400	98809849	5.11267
60092	chr15	75743550	75748149	5.10633
60093	chr15	99087100	99088799	5.01772
60094	chr2	119757250	119760949	5.10187
60095	chr3	87996150	88003049	5.11133
60096	chr1	42695750	42701399	5.19212
60097	chr8	84797200	84801299	5.02013
60098	chr19	43606350	43621249	5.26506
60099	chr5	143251900	143256149	4.97278
60100	chr9	74856600	74861549	5.04906
60101	chr18	42396450	42402599	5.17019
60102	chr16	91218800	91230549	5.21005
60103	chr11	75164550	75169049	5.101
60104	chr4	99648850	99661049	5.07796
60105	chr14	32597500	32601399	5.22925
60106	chr11	83849650	83855749	5.06643
60107	chr10	79715600	79718049	5.27297
60108	chr11	97532250	97535999	5.01957
60109	chr4	126731850	126736849	5.07924
60110	chr2	147192450	147195849	5.07085
60111	chr8	69880150	69890149	5.05094
60112	chr1	120602500	120608999	4.96467
60113	chr4	152338200	152340299	4.93597
60114	chr11	33194950	33206649	5.16716
60115	chr14	12340950	12351599	5.10926
60116	chr17	83629500	83632899	5.06518
60117	chr7	131547050	131558349	5.12405
60118	chr2	28907350	28916099	5.10619
60119	chr5	106453100	106462049	5.08403
60120	chr5	120426200	120436649	5.11346
60121	chr6	30171650	30178799	5.04636
60122	chr2	74673400	74684299	5.00666
60123	chr17	8797450	8801149	5.14165
60124	chr2	26198750	26208049	4.97881
60125	chr2	28916500	28919649	4.99984
60126	chr11	52165800	52168399	5.02408
60127	chr8	12382700	12387749	4.94574
60128	chr17	34956650	34959049	4.96912
60129	chr10	80502100	80504549	5.07143
60130	chr17	87635900	87638099	5.0554
60131	chr7	131540550	131546899	5.02643
60132	chr7	139579300	139586849	4.97705
60133	chr13	31618650	31631799	5.04035
60134	chr5	147299050	147309699	5.25454
60135	chr6	39870650	39873199	4.98653
60136	chr11	53478100	53480749	4.90469
60137	chr9	21031900	21038199	5.01638
60138	chr12	73544100	73547549	4.896
60139	chr7	137314700	137321599	4.8827
60140	chr2	164966750	164968549	5.11318
60141	chr14	118229350	118238649	4.9288
60142	chrX	140060400	140062499	4.85869
60143	chr4	152129400	152133599	4.97992
60144	chr5	24524350	24529299	4.85426
60145	chr6	83066100	83072899	4.92464
60146	chr2	74653300	74661949	4.95313
60147	chr19	44745650	44754099	4.96701
60148	chr1	155731700	155744799	4.909
60149	chr5	101656800	101665199	4.97633
60150	chr9	55541250	55548749	4.9789
60151	chr2	119321250	119327099	4.95769
60152	chr4	135148400	135158799	5.03981
60153	chr8	14094700	14098849	4.86737
60154	chr11	96171650	96176799	4.9541
60155	chr4	138393800	138397449	4.9905
60156	chr11	5056200	5061849	5.06277
60157	chr5	139548550	139559549	5.09877
60158	chr14	69169800	69176399	4.90109
60159	chr8	78432350	78438349	4.98642
60160	chr2	148034800	148048099	4.98053
60161	chr15	35296700	35304549	4.91688
60162	chrX	93284900	93292399	4.95205
60163	chr11	90388000	90390599	5.00617
60164	chr4	109977950	109988549	4.92597
60165	chr5	147313750	147317599	5.07901
60166	chr8	121072000	121092099	4.94985
60167	chr12	111273400	111276649	4.81816
60168	chr11	119054000	119056299	4.94966
60169	chr5	108365400	108371399	4.79198
60170	chr4	139819600	139834549	4.91691
60171	chr14	70075100	70083049	4.99119
60172	chr3	88213050	88217549	4.94058
60173	chr9	91376150	91381149	4.91923
60174	chr1	74855050	74858249	5.00028
60175	chr7	63755450	63760599	4.86688
60176	chr8	84770750	84790399	4.94808
60177	chr1	4490050	4498899	4.9166
60178	chr11	4945900	4949399	4.8419
60179	chr15	85576900	85583099	4.75582
60180	chr2	71529850	71546449	5.09786
60181	chr11	98337850	98340299	4.82378
60182	chr10	84754250	84760199	4.78494
60183	chr14	63940500	63944799	4.75548
60184	chr18	65935200	65940899	4.89136
60185	chr1	74881050	74886999	4.92464
60186	chr9	118475350	118481599	4.89175
60187	chr5	147269500	147278749	4.85466
60188	chr6	91409650	91411699	4.99395
60189	chr11	97114050	97116649	4.7979
60190	chr15	102942900	102949299	5.04656
60191	chr16	18620050	18626549	4.93652
60192	chr2	36101800	36107099	4.81351
60193	chr14	104463150	104470699	4.81769
60194	chr11	6064000	6068149	4.99955
60195	chr13	73267900	73272849	4.84909
60196	chr11	114790000	114793599	4.84638
60197	chr2	180889550	180894849	4.83884
60198	chr13	56248900	56254899	4.98437
60199	chr8	71684300	71694749	4.84619
60200	chr5	139907700	139914549	4.88268
60201	chr11	116280500	116284599	4.85051
60202	chr11	97985400	97987399	4.73133
60203	chr7	45174300	45176799	4.80993
60204	chr1	78194750	78204749	4.80683
60205	chr2	180641050	180642849	4.83045
60206	chr9	111310900	111313449	4.84463
60207	chr19	6931600	6936099	4.94605
60208	chr7	79496600	79516349	4.87609
60209	chr9	22050700	22053049	4.81295
60210	chr4	154958650	154962899	4.82257
60211	chr15	75996200	76005399	4.97483
60212	chr9	55024400	55026849	4.6748
60213	chr8	70372650	70377699	4.85949
60214	chr12	118847300	118850799	4.7896
60215	chr8	11477000	11478749	4.93294
60216	chr14	67229550	67234299	4.89144
60217	chr8	105258950	105259749	4.64658
60218	chr2	19429500	19433349	4.87165
60219	chr5	67096750	67104899	4.9012
60220	chr4	125485550	125493849	4.73882
60221	chr8	70891050	70893299	4.82185
60222	chr12	56532850	56539349	4.88713
60223	chr7	24942650	24950149	4.85667
60224	chr7	79533200	79538599	4.8563
60225	chr15	102930900	102942799	4.86304
60226	chr12	110276600	110283399	4.81279
60227	chr11	4744400	4749199	4.74491
60228	chr7	121391900	121393699	4.74838
60229	chr7	46396800	46398449	4.81087
60230	chr2	60402550	60402999	4.94941
60231	chr19	6398700	6401499	4.87799
60232	chr13	98351900	98361799	4.77407
60233	chr17	85613850	85628999	4.93751
60234	chr15	72545200	72548249	4.71721
60235	chr15	39196250	39198949	4.74118
60236	chr10	80340600	80345699	4.74775
60237	chr19	46316150	46319399	4.84548
60238	chr18	36281700	36286299	4.80666
60239	chr9	74846700	74856349	4.77134
60240	chr7	144837350	144840699	4.86406
60241	chr12	84569250	84573999	4.7679
60242	chr15	74515150	74519399	5.17004
60243	chr6	38351100	38356799	4.74573
60244	chr13	98500050	98503449	4.82995
60245	chr10	42576850	42588249	4.83911
60246	chr1	74769700	74772899	4.80437
60247	chr5	120436700	120440699	4.77596
60248	chr17	26835850	26846999	4.94466
60249	chr15	79803000	79806249	4.83114
60250	chr5	138995400	138999549	4.97833
60251	chr5	31136550	31139649	4.90044
60252	chr4	133518250	133520349	4.71601
60253	chr3	103574200	103576649	4.82675
60254	chr4	115055150	115064299	4.85104
60255	chr9	64385900	64387899	4.82841
60256	chr17	32395500	32397649	4.79447
60257	chr2	29249950	29252899	4.80049
60258	chr12	72937400	72947699	4.8516
60259	chr6	85510750	85514149	4.89642
60260	chr5	31091500	31096649	4.74374
60261	chr2	118675850	118678199	4.78613
60262	chr2	164968800	164970249	4.81859
60263	chr1	78214200	78219449	4.91383
60264	chr6	88189900	88198449	4.66592
60265	chr2	131560350	131562749	4.6549
60266	chr7	35185050	35187149	4.72531
60267	chr2	71524950	71529449	4.68156
60268	chr13	48656600	48667849	4.82822
60269	chr11	119047600	119050399	4.74718
60270	chr5	35388900	35402299	4.73926
60271	chr15	80011100	80016149	4.76673
60272	chr19	10389350	10390849	4.69411
60273	chr2	118700450	118706599	4.74814
60274	chr4	21675950	21681749	4.68065
60275	chr11	95829350	95831899	4.73058
60276	chr11	69964250	69966949	4.68282
60277	chr14	64585150	64592599	4.5976
60278	chr11	119088250	119090949	4.76263
60279	chr9	37432100	37435349	4.7023
60280	chr4	114922800	114927749	4.67837
60281	chr4	44701300	44704549	4.84605
60282	chr2	19443500	19449749	4.6751
60283	chr5	122048100	122049749	4.74867
60284	chr7	5052100	5057699	4.82599
60285	chr13	55824150	55838549	4.80232
60286	chr7	27329400	27335249	4.77077
60287	chr16	91267850	91273299	4.66761
60288	chr2	146222100	146226249	4.7484
60289	chr5	67227250	67233349	4.75796
60290	chr1	87152550	87157049	4.79497
60291	chr11	115857950	115859599	4.6602
60292	chr11	21991550	22001649	4.6952
60293	chr10	80354750	80358099	4.65465
60294	chr10	42635700	42637349	4.74605
60295	chr11	93097350	93100299	4.69214
60296	chr15	78717400	78720149	4.64366
60297	chr5	111417800	111421099	4.64661
60298	chr8	106135050	106138049	4.67864
60299	chr13	38345250	38347649	4.58154
60300	chr6	52308950	52321599	4.64184
60301	chr11	75793850	75796999	4.74004
60302	chr16	94078900	94089849	4.80573
60303	chr2	70472400	70477749	4.78575
60304	chr7	16474300	16477349	4.66235
60305	chr3	18050100	18056349	4.74032
60306	chr14	68123800	68125099	4.6875
60307	chr2	147185300	147187549	4.67753
60308	chr17	27510950	27514799	4.63354
60309	chr4	137277300	137279249	4.66455
60310	chr10	127524950	127529299	4.67697
60311	chr8	12387850	12395349	4.65887
60312	chr4	22491000	22492199	4.68416
60313	chr9	99867450	99879899	4.61776
60314	chr17	36166800	36169899	4.70922
60315	chr2	105122400	105136299	4.75761
60316	chr3	82875200	82876449	4.70122
60317	chr19	24896500	24902599	4.64969
60318	chr19	25504700	25508399	4.7139
60319	chr2	158607750	158617399	4.76508
60320	chr2	61803000	61811849	4.56052
60321	chr10	127339950	127342049	4.6699
60322	chr19	5447300	5449149	4.87947
60323	chr9	40874100	40880799	4.57759
60324	chr13	83736450	83738949	4.58228
60325	chr11	77931050	77933849	4.92164
60326	chr15	102974800	102979549	4.64936
60327	chr1	89931250	89935949	4.78203
60328	chr11	118567650	118571949	4.68668
60329	chr5	118025400	118029799	4.80222
60330	chr13	54736950	54739049	4.60282
60331	chr15	98167850	98170499	4.6898
60332	chr4	109973250	109977899	4.79775
60333	chr5	147185100	147193749	4.63651
60334	chr8	84943850	84947149	4.59934
60335	chr11	84515750	84525449	4.69351
60336	chr17	87796450	87799649	4.70786
60337	chr19	6427300	6429899	4.70135
60338	chr15	99092200	99099149	4.88729
60339	chr15	102908650	102920999	4.68929
60340	chr9	69757000	69762349	4.69743
60341	chr5	28462000	28467599	4.70253
60342	chr17	23740550	23746749	4.63655
60343	chr11	59306950	59308049	4.55625
60344	chr5	29467400	29476999	4.71109
60345	chr12	117149800	117154149	4.71611
60346	chr7	140046550	140051749	4.61365
60347	chr19	56720500	56725499	4.58271
60348	chr11	119057350	119060149	4.73232
60349	chr1	74790400	74793749	4.77057
60350	chr4	117302500	117305399	4.76864
60351	chr2	73278800	73281549	4.55497
60352	chr13	94874150	94878349	4.76218
60353	chrX	137117050	137121199	4.60873
60354	chr4	109663350	109666249	4.68589
60355	chr11	115248500	115251499	4.71982
60356	chr15	100634950	100637799	4.67078
60357	chr4	124893750	124896249	4.51103
60358	chr5	35277700	35282299	4.62138
60359	chr12	56687000	56695249	4.69116
60360	chr8	12427650	12432699	4.57755
60361	chr17	34968700	34971999	4.59815
60362	chr19	45075600	45081299	4.63619
60363	chr6	23252250	23255999	4.65523
60364	chr9	19575250	19575699	4.46667
60365	chr12	57538450	57544249	4.67028
60366	chr6	52257550	52260849	4.67619
60367	chr7	45413600	45417249	4.53514
60368	chr2	9876050	9878349	4.56796
60369	chr5	34286500	34288599	4.69981
60370	chr9	57500800	57506399	4.74276
60371	chr18	64340250	64346249	4.67821
60372	chr1	64734550	64737349	4.57001
60373	chr2	19450250	19454149	4.65441
60374	chr19	37684300	37688949	4.63924
60375	chr2	26121600	26122649	4.71128
60376	chr11	119080100	119084199	4.56208
60377	chr5	106464800	106471699	4.66406
60378	chr13	92425250	92427799	4.50991
60379	chr4	91372100	91374749	4.57665
60380	chr9	91359100	91366199	4.69273
60381	chr3	129221100	129227199	4.66005
60382	chr9	74862050	74867349	4.61068
60383	chr10	19356750	19359949	4.56013
60384	chr11	101176150	101177499	4.65068
60385	chr13	94880150	94884099	4.68051
60386	chr5	28458750	28461099	4.69995
60387	chr12	73036450	73042099	4.54644
60388	chr8	78426400	78427949	4.60304
60389	chr3	104960050	104962499	4.6238
60390	chr12	49375550	49383799	4.557
60391	chr19	6497000	6500899	4.58698
60392	chr19	37432950	37438449	4.52089
60393	chr11	59175450	59178249	4.61056
60394	chr7	79052900	79053999	4.61233
60395	chr9	122568450	122570749	4.50485
60396	chr1	184722650	184732499	4.47706
60397	chr15	102949450	102957699	4.57449
60398	chr7	44590950	44593699	4.5901
60399	chr5	67093350	67096699	4.75211
60400	chr10	87489100	87490149	4.621
60401	chr19	7164000	7167549	4.45966
60402	chr5	35383650	35388649	4.58934
60403	chr9	118486400	118488299	4.67113
60404	chr14	63245400	63257049	4.59165
60405	chr2	130361400	130362849	4.54155
60406	chr15	99588800	99591999	4.54013
60407	chr2	122295650	122300399	4.5298
60408	chr8	72319100	72321549	4.66507
60409	chr11	102144950	102148399	4.57019
60410	chr5	33996850	33998549	4.6318
60411	chr3	129199900	129204649	4.64442
60412	chr19	43596950	43604849	4.62678
60413	chr7	126080700	126083649	4.57004
60414	chr11	95831950	95834949	4.57114
60415	chr2	147180650	147185099	4.62849
60416	chr6	6859100	6862599	4.60631
60417	chr11	96198900	96205849	4.4532
60418	chr10	42631150	42635599	4.63691
60419	chr11	59290250	59292949	4.50654
60420	chr5	98188200	98190549	4.62756
60421	chr3	88198400	88204249	4.54155
60422	chr2	105661400	105678249	4.60371
60423	chr18	64331300	64338999	4.60128
60424	chr2	31844950	31847499	4.65375
60425	chr6	85185200	85189049	4.60979
60426	chr2	18697750	18700899	4.6319
60427	chr2	74647250	74652949	4.6457
60428	chr2	38708500	38713749	4.57281
60429	chr4	152157900	152161649	4.69347
60430	chr6	23243750	23251099	4.69351
60431	chr15	85669150	85672949	4.66033
60432	chr2	31313450	31315299	4.44431
60433	chr5	36866950	36871049	4.50253
60434	chr7	31050350	31053249	4.55722
60435	chr17	36144350	36146849	4.51568
60436	chr17	56510100	56512649	4.45892
60437	chr9	43205200	43206749	4.57819
60438	chr9	58201850	58204149	4.63881
60439	chr1	56975300	56978799	4.55799
60440	chr5	120425600	120425999	4.49522
60441	chr7	132596600	132601349	4.60967
60442	chr10	67538100	67539549	4.47347
60443	chr7	81452700	81456299	4.56448
60444	chr1	74948550	74953849	4.53654
60445	chr11	119034550	119037249	4.51068
60446	chr12	111442650	111449349	4.60889
60447	chrX	93296800	93298649	4.4946
60448	chr6	52261700	52265049	4.57646
60449	chr2	25263000	25264249	4.40168
60450	chr2	31652300	31655449	4.50621
60451	chr9	69762550	69767349	4.61821
60452	chr11	96267800	96274799	4.67111
60453	chr5	75068600	75086499	4.64144
60454	chr8	84911900	84913299	4.45535
60455	chr8	105267950	105273049	4.56522
60456	chr3	34659650	34666649	4.52239
60457	chr5	29477050	29481749	4.51153
60458	chr10	42571850	42575349	4.49224
60459	chr1	93099900	93102849	4.44805
60460	chr2	18799400	18802399	4.54998
60461	chr15	79931800	79934899	4.58977
60462	chr2	153070400	153073149	4.35297
60463	chr10	127529400	127536649	4.53041
60464	chr15	98893150	98899449	4.50862
60465	chr19	6924750	6928349	4.55009
60466	chr16	93682400	93684949	4.51766
60467	chr12	111669850	111674399	4.62014
60468	chr13	63570550	63574899	4.42348
60469	chr5	28165800	28177999	4.57391
60470	chr10	81342050	81344149	4.60861
60471	chr11	95119950	95123499	4.46432
60472	chr4	133495750	133498199	4.45786
60473	chr15	7810700	7812899	4.46221
60474	chr13	31614400	31617049	4.49315
60475	chr13	120027350	120039049	4.61402
60476	chr5	29483850	29488299	4.50362
60477	chr1	187605250	187610749	4.60713
60478	chr11	115265500	115267799	4.59237
60479	chr17	29093950	29095149	4.51648
60480	chr3	127629600	127634149	4.52747
60481	chr4	152313850	152316699	4.48695
60482	chr5	28156800	28162849	4.49481
60483	chr2	180774300	180778799	4.41477
60484	chr9	122570850	122573849	4.51459
60485	chr9	69767450	69771599	4.52178
60486	chr12	57547950	57552199	4.61123
60487	chr7	27363300	27365299	4.47475
60488	chr5	139535000	139541999	4.63978
60489	chr5	118169750	118174349	4.55774
60490	chr5	137287300	137288849	4.56352
60491	chr6	6875000	6877499	4.63086
60492	chr11	50602200	50603849	4.47313
60493	chr8	124793500	124795099	4.53218
60494	chr11	75193050	75195599	4.56163
60495	chr5	138992200	138994999	4.55013
60496	chr11	116107300	116111099	4.56709
60497	chrX	105762950	105765849	4.51426
60498	chr11	103748700	103750699	4.56067
60499	chr1	136050100	136051549	4.53961
60500	chr11	115317100	115319549	4.44938
60501	chr13	56255150	56261499	4.5115
60502	chr2	84887400	84888549	4.52764
60503	chr5	130448500	130450549	4.35917
60504	chr17	45543350	45546699	4.40228
60505	chrX	48453250	48454149	4.47208
60506	chr11	35797100	35798949	4.53998
60507	chr11	74588950	74591099	4.39524
60508	chr4	48045400	48050799	4.57523
60509	chr7	123982900	123985199	4.40069
60510	chr5	114272700	114273799	4.48178
60511	chr4	22489100	22490849	4.49832
60512	chr10	79917650	79922749	4.4764
60513	chr11	85833550	85841549	4.52716
60514	chr4	124655400	124657349	4.58134
60515	chr11	98050850	98053249	4.55762
60516	chr4	11384100	11390699	4.37616
60517	chr6	8948050	8951449	4.35299
60518	chr11	75170800	75173299	4.60336
60519	chr8	122676950	122678549	4.35102
60520	chr9	52677200	52679799	4.42027
60521	chr5	147722100	147728249	4.42486
60522	chr17	57061300	57063599	4.40559
60523	chr2	91921700	91924199	4.48737
60524	chr2	172545100	172549449	4.57796
60525	chr16	97762500	97764999	4.47763
60526	chr7	45180800	45182299	4.49622
60527	chr19	6829100	6831699	4.54197
60528	chr1	191183800	191186599	4.74176
60529	chr16	35152900	35156749	4.4164
60530	chr15	99054650	99057599	4.43518
60531	chr19	44740800	44744399	4.39635
60532	chr13	48667950	48670099	4.53145
60533	chr12	73044100	73046649	4.47549
60534	chr13	112987850	112990799	4.44179
60535	chr11	69800850	69805849	4.42954
60536	chr13	98362150	98365599	4.36424
60537	chr9	98951200	98959049	4.48389
60538	chr19	47012900	47016499	4.38924
60539	chr7	81991300	81993849	4.39447
60540	chr5	120693350	120696049	4.43214
60541	chr3	129214350	129220599	4.53904
60542	chr19	59166300	59174599	4.3652
60543	chr4	108216950	108219149	4.39507
60544	chr1	184715100	184721799	4.59983
60545	chr1	184732800	184734799	4.40449
60546	chr2	170494750	170498349	4.49419
60547	chr15	102924350	102929349	4.38442
60548	chr1	78190500	78194349	4.56073
60549	chr8	70083600	70086549	4.54768
60550	chr10	42588400	42594099	4.67822
60551	chr4	46989950	46992949	4.64126
60552	chr11	22001950	22005249	4.56788
60553	chr13	98365650	98369449	4.5508
60554	chr2	172042550	172044049	4.45045
60555	chr17	33977000	33979799	4.32443
60556	chr11	98348150	98351549	4.5803
60557	chr11	87356850	87358799	4.3114
60558	chr12	57544350	57547749	4.44731
60559	chr9	78395400	78396799	4.39039
60560	chr7	49633200	49641049	4.54163
60561	chr8	87468200	87472349	4.44095
60562	chr3	34640850	34645099	4.45228
60563	chr1	180696200	180697849	4.41968
60564	chr2	146833750	146840949	4.41264
60565	chr10	127058600	127059849	4.35337
60566	chr11	95913400	95916899	4.43723
60567	chr7	141949900	141951649	4.53662
60568	chr7	24930900	24933299	4.35639
60569	chr2	93954950	93957549	4.37217
60570	chr12	57534550	57538299	4.38771
60571	chr13	94884200	94886949	4.49054
60572	chr19	44833800	44839299	4.43637
60573	chr12	104473550	104478799	4.33622
60574	chr8	94171100	94173699	4.54257
60575	chr7	25008650	25011399	4.35223
60576	chr3	87793000	87798299	4.40293
60577	chr12	49383900	49386549	4.44777
60578	chr2	163203000	163205649	4.53429
60579	chr12	56611550	56616499	4.42994
60580	chr10	81134100	81136199	4.32975
60581	chr4	124985050	124989349	4.46096
60582	chr6	88198950	88206249	4.35367
60583	chr10	81452000	81453499	4.32019
60584	chr14	55113300	55117349	4.26352
60585	chr4	153481200	153482999	4.39726
60586	chr13	120014600	120016499	4.39541
60587	chr12	112143200	112145199	4.33056
60588	chr2	152092300	152094499	4.36015
60589	chr16	20589850	20592549	4.5359
60590	chrX	141723500	141725399	4.39024
60591	chr15	79162800	79165199	4.34786
60592	chr1	135918300	135919849	4.46998
60593	chr10	80834500	80836199	4.31128
60594	chr19	5558600	5562349	4.53459
60595	chr3	129196700	129198899	4.45042
60596	chr2	36091450	36096349	4.33776
60597	chr10	44002750	44005449	4.46364
60598	chr11	101261350	101265899	4.49875
60599	chr7	49974600	49977099	4.34975
60600	chr18	11053050	11056449	4.35956
60601	chr16	31933150	31935899	4.50621
60602	chr15	98773550	98781099	4.43809
60603	chr13	31556250	31560849	4.34531
60604	chr14	32461650	32466449	4.45738
60605	chr2	73266950	73274799	4.41194
60606	chr10	22149300	22160299	4.31003
60607	chr8	84558100	84560399	4.37053
60608	chr12	80758350	80760549	4.42781
60609	chr9	65390600	65392499	4.26836
60610	chr11	116530450	116534299	4.48214
60611	chr10	19351350	19356699	4.39494
60612	chr4	115962000	115964999	4.25087
60613	chr13	94869250	94874049	4.50233
60614	chr7	144860450	144864399	4.32417
60615	chr15	102963900	102966349	4.48839
60616	chr11	82386500	82390699	4.41958
60617	chr14	58072500	58074999	4.43102
60618	chr11	98333800	98335899	4.42931
60619	chr2	122300550	122302699	4.46158
60620	chr11	100968750	100971849	4.37213
60621	chr13	40736200	40743099	4.33764
60622	chr5	147267250	147269349	4.37367
60623	chr3	89829900	89832749	4.36896
60624	chr6	6848100	6853449	4.326
60625	chr11	52763700	52765999	4.40814
60626	chr1	120595100	120601749	4.35457
60627	chr17	26201050	26202699	4.4067
60628	chr6	85189250	85192749	4.40358
60629	chr4	127329600	127331199	4.41984
60630	chr17	28363100	28365399	4.45164
60631	chr17	85679700	85688249	4.50081
60632	chr14	122472300	122473599	4.33091
60633	chr12	49388950	49395749	4.50168
60634	chr2	74663700	74671599	4.35416
60635	chr8	121113650	121115949	4.46936
60636	chr2	13009050	13012949	4.27856
60637	chr17	35263250	35264849	4.22536
60638	chr4	115943800	115944449	4.40659
60639	chr16	17913000	17916799	4.46474
60640	chr4	127987600	127989449	4.33203
60641	chr19	25672400	25676299	4.4879
60642	chr4	152124500	152127449	4.4299
60643	chr13	31801550	31806449	4.36066
60644	chr5	112575750	112578199	4.47996
60645	chr18	42393800	42396249	4.3863
60646	chr5	93042800	93046099	4.37343
60647	chr14	66910050	66911749	4.34804
60648	chr8	12501250	12505199	4.3153
60649	chr14	48664550	48671699	4.44863
60650	chr10	80489000	80491749	4.40089
60651	chr17	85463400	85466399	4.1761
60652	chr12	86421250	86424099	4.4401
60653	chr2	22622250	22625899	4.31535
60654	chr10	62128600	62131699	4.29599
60655	chr5	137030400	137032449	4.5873
60656	chr19	37695600	37699649	4.33289
60657	chr7	49906600	49916699	4.45133
60658	chr8	120882350	120887499	4.4536
60659	chr3	83127600	83130349	4.34284
60660	chr2	25288850	25292999	4.36892
60661	chr17	26847250	26853649	4.36221
60662	chr6	115992700	115994899	4.39426
60663	chr7	19522650	19524649	4.3816
60664	chr3	154326250	154331049	4.35405
60665	chr17	8428800	8436849	4.41777
60666	chr2	25180550	25183099	4.49735
60667	chr11	85886750	85894849	4.38445
60668	chr18	25677900	25679799	4.22348
60669	chr14	118224300	118227849	4.35052
60670	chr5	38275500	38278649	4.32123
60671	chr11	96251450	96257149	4.33722
60672	chr4	41725350	41728049	4.41227
60673	chr11	22857550	22859199	4.34299
60674	chr17	85606200	85613649	4.34532
60675	chr14	67234800	67238649	4.29601
60676	chr13	84343800	84347399	4.22917
60677	chr2	127362750	127365549	4.35559
60678	chr15	80091400	80092799	4.25953
60679	chr13	3357850	3360749	4.37483
60680	chr11	95147500	95151399	4.36285
60681	chr9	21243650	21246299	4.31278
60682	chr9	91381900	91388349	4.41142
60683	chr7	142968300	142970699	4.33736
60684	chr19	25607650	25614299	4.44841
60685	chr16	94091250	94097949	4.34028
60686	chr4	114899400	114904349	4.38769
60687	chr16	94124450	94126799	4.23317
60688	chr5	138755000	138756899	4.46787
60689	chr8	70111350	70114049	4.34062
60690	chr19	25603650	25606049	4.32985
60691	chr2	130575800	130582549	4.4648
60692	chr17	86754150	86756649	4.36153
60693	chr10	52022450	52029599	4.32597
60694	chr13	54948250	54949149	4.27393
60695	chr2	153529450	153531349	4.24034
60696	chr2	70561200	70568249	4.33378
60697	chr17	52601450	52603649	4.2538
60698	chr15	79503950	79505749	4.28096
60699	chr14	70553400	70555899	4.4552
60700	chr7	30452950	30458899	4.33105
60701	chr6	145864350	145865549	4.39739
60702	chr4	148804750	148808099	4.37579
60703	chr5	28122100	28125349	4.32439
60704	chr17	85688550	85693499	4.34096
60705	chr6	52272700	52276899	4.21894
60706	chr7	79540900	79544099	4.42132
60707	chr4	43523550	43525149	4.36822
60708	chr2	84884900	84887249	4.31219
60709	chr1	172561600	172562849	4.3014
60710	chr4	154138000	154142149	4.43933
60711	chr1	125910900	125913749	4.34182
60712	chr15	7814300	7816649	4.41122
60713	chr5	119660500	119662449	4.43715
60714	chr9	37457500	37462499	4.34438
60715	chr2	94239100	94245299	4.36395
60716	chr18	82405250	82407949	4.24161
60717	chr16	17832400	17835499	4.27316
60718	chr6	52265200	52268849	4.45532
60719	chr7	29018800	29020399	4.33968
60720	chr9	56794850	56796049	4.20967
60721	chr14	63239300	63245349	4.31966
60722	chr9	63136250	63139399	4.4379
60723	chr5	120710150	120712249	4.39598
60724	chr1	74782050	74784799	4.50791
60725	chr1	136259350	136261599	4.40043
60726	chr5	98178750	98185399	4.434
60727	chr2	118895550	118900399	4.29314
60728	chr2	165232600	165236349	4.20902
60729	chr3	34650000	34659499	4.23781
60730	chr7	98192850	98194949	4.35556
60731	chr19	43605100	43606299	4.33363
60732	chr8	9769600	9771099	4.39009
60733	chr7	19489150	19490349	4.174
60734	chr11	117413400	117416049	4.28562
60735	chr17	8339650	8342299	4.30473
60736	chr7	36690650	36695799	4.16578
60737	chr12	117154200	117157449	4.28747
60738	chr6	70954700	70958349	4.23655
60739	chr5	98168350	98173499	4.41127
60740	chr3	108225200	108227499	4.40171
60741	chr8	111889250	111891449	4.27256
60742	chr7	137321900	137324049	4.20827
60743	chr17	24752250	24754799	4.30374
60744	chr4	134250000	134253149	4.41384
60745	chrX	60889750	60894849	4.26956
60746	chr7	139943200	139946249	4.35203
60747	chr15	64919700	64922599	4.17965
60748	chr15	81692550	81693999	4.22737
60749	chr10	42612750	42615999	4.31087
60750	chr7	25687000	25690099	4.30101
60751	chr2	153031150	153032149	4.24299
60752	chr10	127165400	127167699	4.49078
60753	chr7	18956900	18957949	4.19066
60754	chr7	45167700	45169349	4.40136
60755	chr11	97536050	97538099	4.43677
60756	chr12	84874000	84877449	4.26965
60757	chr1	39193700	39195899	4.14431
60758	chr2	146217350	146221849	4.28914
60759	chr4	115934200	115943649	4.44011
60760	chr9	67759000	67760299	4.20875
60761	chr9	91350150	91355649	4.21675
60762	chr2	144329700	144334399	4.36684
60763	chr2	84871200	84873249	4.15125
60764	chr1	190171100	190174599	4.36392
60765	chr7	27403500	27405249	4.29567
60766	chr3	88240250	88242599	4.25129
60767	chr2	180102100	180104299	4.36266
60768	chr1	56969300	56971249	4.18266
60769	chr1	87263250	87266899	4.20397
60770	chrX	137099000	137100899	4.32383
60771	chr11	98336150	98337799	4.18225
60772	chr8	71679050	71682599	4.12654
60773	chr2	164403350	164406299	4.18552
60774	chr4	41497450	41500099	4.28719
60775	chr5	134985300	134988399	4.14999
60776	chr3	88020900	88024749	4.34015
60777	chr3	116250350	116252899	4.12998
60778	chr3	95172000	95174249	4.25922
60779	chr5	143287950	143289499	4.2054
60780	chr8	119699300	119700649	4.20973
60781	chr11	96262300	96265299	4.28908
60782	chr5	106558400	106562349	4.26673
60783	chr11	98318300	98321999	4.36109
60784	chr5	41745000	41748649	4.27816
60785	chr14	79768050	79769699	4.32993
60786	chr4	22477800	22481849	4.29191
60787	chr9	21960800	21962449	4.29104
60788	chr4	89273300	89279949	4.40537
60789	chr7	49246500	49248349	4.2583
60790	chr9	40870700	40873349	4.13099
60791	chr4	45824550	45828049	4.19708
60792	chr13	73266350	73267749	4.17403
60793	chr1	133162800	133165249	4.19895
60794	chr1	42709200	42714499	4.24258
60795	chr18	80362150	80363799	4.21799
60796	chr8	84010200	84013499	4.26897
60797	chr11	59287650	59290149	4.3628
60798	chr2	121805500	121806599	4.21531
60799	chr1	127675850	127678949	4.21416
60800	chr2	9882100	9890649	4.26385
60801	chr12	82616800	82618899	4.12224
60802	chr13	83725250	83728449	4.24893
60803	chr16	17277200	17278249	4.25199
60804	chr18	46199400	46200599	4.18181
60805	chr18	80987300	80990549	4.25366
60806	chr6	6877800	6881749	4.22185
60807	chr7	25181800	25182599	4.123
60808	chr1	5019950	5021849	4.21838
60809	chr9	24768350	24780749	4.28795
60810	chr11	115319850	115322399	4.22577
60811	chr4	114909100	114915549	4.2369
60812	chr12	9578250	9580899	4.20549
60813	chr6	114397350	114399399	4.26508
60814	chr14	39471000	39474549	4.20308
60815	chr2	163853050	163855599	4.12573
60816	chr19	59189950	59192499	4.28401
60817	chr11	96186000	96198649	4.3005
60818	chr11	104231600	104234649	4.2637
60819	chr9	63151400	63153149	4.23512
60820	chrX	93294150	93296599	4.13614
60821	chr2	29844550	29846949	4.34861
60822	chr1	89967450	89969899	4.17568
60823	chr7	16944900	16948499	4.20758
60824	chr11	95141200	95147299	4.29889
60825	chr12	56525550	56532749	4.18526
60826	chr6	83086750	83088599	4.12176
60827	chr4	99661600	99664499	4.44656
60828	chr2	105678350	105689599	4.34249
60829	chr12	108317750	108319599	4.10037
60830	chr8	47411850	47413649	4.17391
60831	chr17	56472600	56474999	4.23488
60832	chr4	148163950	148166899	4.23724
60833	chr2	36096600	36098149	4.33554
60834	chr7	130934900	130937799	4.26709
60835	chr7	35119500	35121849	4.28832
60836	chr9	110944600	110947599	4.35452
60837	chr13	54765500	54766549	4.26626
60838	chr15	82210200	82214149	4.19363
60839	chr4	126286200	126287899	4.18173
60840	chr13	56752250	56754399	4.30147
60841	chr18	23039500	23041399	4.16606
60842	chr8	94694000	94696499	4.09903
60843	chr17	36942550	36943749	4.19221
60844	chr2	147364800	147368749	4.17546
60845	chr15	80285700	80288749	4.15685
60846	chr1	75217450	75219199	4.25974
60847	chr2	164948450	164950749	4.22528
60848	chr7	101817200	101821699	4.16185
60849	chr8	84042500	84045649	4.25346
60850	chr11	97546200	97547199	4.28132
60851	chr10	22814550	22817449	4.21164
60852	chr3	129206550	129209249	4.27564
60853	chr13	114456850	114458899	4.33251
60854	chr12	51592450	51595049	4.15068
60855	chr19	44510900	44513199	4.1411
60856	chr9	91402350	91407899	4.21182
60857	chr12	109051900	109054499	4.12249
60858	chr12	104470750	104472999	4.17933
60859	chr7	107209300	107211599	4.20603
60860	chr14	63267350	63271849	4.2272
60861	chr19	42430100	42431599	4.20047
60862	chr2	127655250	127657149	4.20947
60863	chr5	114273950	114275149	4.37739
60864	chr15	76089700	76091399	4.29257
60865	chr2	181133350	181136299	4.17174
60866	chr12	111422900	111425049	4.15227
60867	chr15	95526700	95528099	4.23081
60868	chr11	84525900	84530949	4.26994
60869	chr6	6853650	6858949	4.26735
60870	chr9	78441100	78444099	4.20307
60871	chr19	16868850	16878649	4.27932
60872	chr4	89304100	89310499	4.25594
60873	chr2	163338700	163340199	4.17571
60874	chr17	47833750	47835049	4.20045
60875	chr2	24471750	24475849	4.33029
60876	chr19	42200350	42202699	4.15311
60877	chr6	52251800	52254999	4.18916
60878	chr10	121350350	121352249	4.09714
60879	chr15	78802100	78804249	4.06798
60880	chr19	10456100	10457499	4.21105
60881	chr2	181669600	181673249	4.25035
60882	chr15	102966900	102974549	4.22821
60883	chr17	26414900	26415799	4.17585
60884	chr7	27365400	27368199	4.11358
60885	chr4	129247500	129249499	4.0609
60886	chr7	113766500	113767349	4.0956
60887	chr8	123537350	123604399	4.25275
60888	chr16	92695150	92697049	4.04748
60889	chr8	106602700	106604999	4.2455
60890	chr2	18686150	18692399	4.15427
60891	chr10	103030600	103032499	4.28414
60892	chr3	93444800	93448699	4.33601
60893	chr16	30309100	30310599	4.14678
60894	chr11	103198500	103199799	4.0501
60895	chr11	102105850	102108599	4.22652
60896	chr6	64729300	64735549	4.23313
60897	chr11	116333400	116335199	4.17458
60898	chr2	153491350	153492349	4.17539
60899	chr11	49609650	49611649	4.14645
60900	chr17	35319750	35321799	4.18093
60901	chr8	46290300	46295099	4.25212
60902	chr1	74892100	74893599	4.12155
60903	chr18	74441100	74445049	4.1899
60904	chr11	102947150	102948849	4.16487
60905	chr1	167687000	167694449	4.26754
60906	chr15	98796450	98798899	4.13545
60907	chr3	96383150	96385649	4.20802
60908	chr6	127767050	127771049	4.04747
60909	chr17	35340650	35343949	4.11179
60910	chr1	87508800	87510249	4.20395
60911	chr7	81213200	81214849	4.14954
60912	chr7	19304150	19306749	4.17419
60913	chr14	48661300	48663999	4.11791
60914	chr1	120339100	120344199	4.24055
60915	chr5	144545950	144547949	4.18836
60916	chr11	98544800	98547499	4.24648
60917	chr10	80930350	80933349	4.20204
60918	chr7	24610500	24613049	4.12132
60919	chr4	109655500	109663199	4.32125
60920	chr7	99266600	99268099	4.19789
60921	chr11	9117700	9119599	4.19418
60922	chr16	9993950	9996449	4.06994
60923	chr12	55597850	55600249	4.25612
60924	chr6	6873300	6874799	4.15168
60925	chr11	80300300	80302649	4.2169
60926	chr19	59162950	59166249	4.39507
60927	chr8	15028350	15029849	4.14391
60928	chr11	68398000	68401249	4.10893
60929	chr4	120746450	120749449	4.13151
60930	chr10	67534350	67536099	4.20243
60931	chr13	63568500	63570499	4.21297
60932	chr7	142658700	142663749	4.31396
60933	chr16	92699050	92700449	4.22796
60934	chr11	119086750	119088199	4.26657
60935	chr9	34489050	34490099	4.11455
60936	chr19	44733350	44735849	4.36182
60937	chr7	30464800	30467749	4.09722
60938	chr6	83696550	83701849	4.2243
60939	chr8	9771550	9772999	4.09754
60940	chr12	31558850	31560749	4.31753
60941	chr12	83485450	83486049	4.09755
60942	chr11	103170200	103172149	4.19266
60943	chr11	84957050	84958849	4.16593
60944	chr3	96342550	96344999	4.25285
60945	chr11	96176900	96180599	4.21555
60946	chr2	9890800	9893149	4.20586
60947	chr6	83711400	83713899	4.28038
60948	chr12	99964350	99967499	4.17536
60949	chr1	42704200	42709099	4.17127
60950	chr5	147312700	147313699	4.069
60951	chr11	89299700	89301999	4.09535
60952	chr10	50899550	50905299	4.15137
60953	chr12	56518150	56525099	4.13743
60954	chr4	89290100	89293899	4.11641
60955	chr6	51432200	51434449	4.21018
60956	chr15	99089150	99089999	4.06858
60957	chr2	164996900	164998349	4.16931
60958	chr13	58808550	58809499	4.10777
60959	chr15	98632600	98634299	4.12314
60960	chr14	119138050	119139599	4.01164
60961	chr4	44710400	44717399	4.1554
60962	chr11	68384350	68386799	4.18871
60963	chr11	101169200	101170899	4.12524
60964	chr11	72134650	72136799	4.11023
60965	chr3	90464450	90466199	4.0772
60966	chr17	79712950	79715149	4.07519
60967	chr2	61812300	61814799	4.30721
60968	chr17	46296650	46297599	4.11045
60969	chr5	114657250	114659049	4.07532
60970	chr13	78171950	78173499	4.3386
60971	chr17	44736500	44739699	4.0338
60972	chr10	81425200	81428199	4.11352
60973	chr3	89091400	89093149	4.15767
60974	chr13	71956800	71965149	4.27343
60975	chr19	44674000	44676599	4.09504
60976	chr1	136944700	136951749	4.14495
60977	chr19	4989350	4991249	4.03961
60978	chr11	101163400	101165399	4.02084
60979	chr2	148048250	148050199	4.1421
60980	chr4	152311900	152313649	4.12265
60981	chr4	21673650	21675549	4.10536
60982	chr14	34817600	34820899	4.03588
60983	chr13	72629550	72633099	4.04505
60984	chr12	81779350	81780949	4.12397
60985	chr4	49844150	49845649	4.15156
60986	chr2	147187700	147192249	4.26969
60987	chr5	106462550	106464699	4.12997
60988	chr2	147372850	147375749	4.0925
60989	chr1	86045150	86046049	4.14585
60990	chr6	52321700	52324149	4.20438
60991	chr17	8525300	8526799	4.0736
60992	chr1	72874200	72874749	4.06178
60993	chr19	5084700	5086499	4.1054
60994	chr12	56539450	56541049	4.07984
60995	chr4	148173100	148175249	4.09317
60996	chr17	36159100	36163499	4.30843
60997	chr4	22492800	22499699	4.20625
60998	chr12	111270900	111272349	3.99832
60999	chr6	29526700	29528899	4.30653
61000	chr3	127625600	127629349	4.1025
61001	chr1	120612250	120617549	4.17624
61002	chr10	80842850	80845149	4.04346
61003	chr11	102398900	102400249	3.96305
61004	chr11	82433200	82435449	4.01188
61005	chr18	25754350	25755699	4.05919
61006	chr8	123333300	123334449	4.07247
61007	chr5	147398950	147401649	4.13317
61008	chr9	21247750	21249849	4.12139
61009	chr4	148160200	148162649	4.02245
61010	chr2	105658950	105661299	4.17818
61011	chr12	76404750	76407299	4.11955
61012	chr6	85483650	85485399	4.06694
61013	chr9	20725450	20728349	4.11153
61014	chr15	85734300	85735149	4.18316
61015	chr10	60106600	60108599	4.14401
61016	chr11	76997850	76999999	4.08528
61017	chr13	83720800	83725199	4.04393
61018	chr7	35583450	35585299	4.11407
61019	chr4	127166950	127169799	4.05411
61020	chr8	40285800	40287449	4.03517
61021	chr2	152048550	152050749	4.26357
61022	chr11	103360550	103364499	4.11385
61023	chr8	70803550	70804749	4.27496
61024	chr4	114666200	114667299	3.95781
61025	chr1	171077400	171081499	4.11673
61026	chr10	87491350	87492999	4.05589
61027	chr1	19218600	19218949	4.05913
61028	chr13	83712850	83714849	4.00242
61029	chr10	81284450	81285249	4.2161
61030	chr15	11035250	11038149	4.12569
61031	chr8	93810900	93813049	4.02858
61032	chr8	123604450	123624799	4.09432
61033	chr6	142568350	142571699	4.0574
61034	chr2	119236550	119238599	4.08415
61035	chr7	70323750	70325999	4.23149
61036	chr8	70086800	70089199	4.19236
61037	chr18	25753100	25754099	4.06546
61038	chr1	192190950	192191649	4.01713
61039	chr12	14148600	14151649	4.04537
61040	chr2	9893550	9897699	4.12723
61041	chr4	141301650	141302999	4.08495
61042	chr9	21163700	21166249	4.10802
61043	chr13	73259050	73262699	4.10633
61044	chr1	19105150	19107199	4.17269
61045	chr11	69235800	69237599	4.04293
61046	chr6	8954150	8956599	4.11243
61047	chrX	73503200	73504249	3.9813
61048	chr4	127170050	127170749	3.89863
61049	chr10	128195150	128196149	4.15873
61050	chr13	120023300	120027249	4.16004
61051	chr7	144896150	144898299	4.0374
61052	chr19	46325800	46326999	3.95196
61053	chr2	36202300	36203699	3.99059
61054	chr15	99582800	99585399	3.95715
61055	chr4	136955850	136957699	4.01322
61056	chr12	49399250	49402399	3.99283
61057	chr13	100550850	100553049	3.9896
61058	chr12	117157900	117160549	4.06663
61059	chr9	71215350	71218449	4.10396
61060	chr14	66635150	66638949	4.35673
61061	chr2	54436550	54437999	3.94743
61062	chr2	160369200	160371749	4.2278
61063	chr6	120491800	120493899	4.0442
61064	chr5	67220650	67224899	4.03643
61065	chr7	141292850	141295449	3.95364
61066	chr15	37231300	37234199	3.98264
61067	chr5	135866650	135869899	4.09054
61068	chr17	56753800	56754799	3.95941
61069	chr4	124178050	124178849	3.97456
61070	chr1	135103900	135105649	4.03105
61071	chr10	64088600	64089699	3.8978
61072	chr10	127090100	127092499	4.06289
61073	chr5	22342600	22344599	4.18087
61074	chr11	103648550	103650449	4.06258
61075	chr14	104460800	104462599	4.15306
61076	chr3	107457350	107460799	4.04955
61077	chr11	98322250	98325049	4.05318
61078	chr8	125910150	125912049	4.12681
61079	chr6	121412200	121413849	4.05684
61080	chr5	22344750	22346399	4.11558
61081	chr5	28208250	28212999	4.22629
61082	chr10	127047750	127050549	4.12422
61083	chr4	141246750	141248499	4.04221
61084	chr7	70279650	70283249	3.95652
61085	chr2	32082300	32084449	4.10933
61086	chr8	106336350	106337449	4.17404
61087	chr17	56119050	56121749	4.01121
61088	chr5	30105000	30106899	4.07936
61089	chr5	33722350	33724499	4.06939
61090	chr9	102352950	102354349	3.96874
61091	chr17	29886250	29888149	3.9327
61092	chr17	93199750	93203099	4.05722
61093	chr12	49373150	49374649	4.00746
61094	chr1	19225650	19226249	3.96243
61095	chr15	95651550	95655349	3.97984
61096	chr17	34196250	34198999	4.07938
61097	chr11	80154100	80155199	4.00444
61098	chr1	171068650	171074049	4.12655
61099	chr5	135887300	135889799	3.91535
61100	chr5	119657500	119659599	4.04479
61101	chr4	123201050	123202749	4.03511
61102	chr12	98575400	98576199	3.96183
61103	chr5	112227200	112229349	4.01037
61104	chr2	74691900	74693199	4.07307
61105	chr11	70213050	70216199	3.94407
61106	chr2	167187550	167191249	3.9292
61107	chr4	139073600	139076349	4.02862
61108	chr15	76718150	76719199	3.92198
61109	chr10	80347200	80349599	4.07352
61110	chr2	153107550	153109649	3.88044
61111	chr10	60685550	60687299	4.25847
61112	chr12	24679900	24682949	4.0177
61113	chr2	156421600	156423049	3.92423
61114	chr3	34648050	34649749	4.09199
61115	chr15	11904400	11905999	4.02807
61116	chr6	42322400	42324299	4.07952
61117	chr15	55306650	55309199	4.11456
61118	chr2	38338950	38341899	4.08664
61119	chr5	128432250	128434199	4.06616
61120	chr17	23675750	23677299	3.92311
61121	chr1	40679600	40682749	3.99156
61122	chr7	45176900	45178249	4.05848
61123	chr9	45429050	45431599	4.02163
61124	chr4	148951600	148953349	4.03607
61125	chr4	135140300	135142449	4.04085
61126	chr7	143444050	143446249	3.88959
61127	chr12	72936450	72937299	4.01802
61128	chr4	136246150	136247949	3.96474
61129	chr5	67214500	67217299	3.99205
61130	chr13	94594850	94597299	4.00553
61131	chr15	73838150	73840749	3.98702
61132	chr10	62131900	62135349	4.04995
61133	chr1	63251600	63252149	3.89
61134	chr5	117841200	117843749	4.04408
61135	chr17	85484550	85486399	4.16487
61136	chrX	141721300	141723399	4.0813
61137	chr11	50848650	50852199	4.09431
61138	chr7	113207950	113209749	4.01922
61139	chr4	36950750	36951849	3.91664
61140	chr6	31562500	31563799	3.99425
61141	chr2	114012500	114014449	3.96729
61142	chr6	114130850	114132099	4.08202
61143	chr7	142093800	142095299	3.96532
61144	chr10	22273250	22274399	3.92204
61145	chr11	12034600	12038849	3.93321
61146	chr12	86988650	86990799	4.02269
61147	chr3	102009950	102014349	3.93116
61148	chr2	152082050	152082899	3.97811
61149	chr14	34821000	34823499	3.99934
61150	chr8	25037100	25038949	3.88752
61151	chr10	61416750	61418999	3.86612
61152	chr11	101078400	101080749	3.9134
61153	chr2	52674650	52675949	4.1014
61154	chr18	76845400	76847399	4.02543
61155	chr7	143977350	143978749	4.07971
61156	chr10	93833800	93835249	3.99122
61157	chr9	120302850	120305799	4.08545
61158	chr1	63271600	63274949	3.96439
61159	chr4	155042300	155044549	4.0106
61160	chr17	23738700	23740199	3.93125
61161	chr19	59465550	59468199	3.98049
61162	chr2	18607350	18610749	4.06786
61163	chr7	57508050	57509999	4.06566
61164	chr16	91231450	91234399	4.07419
61165	chr2	79454800	79456899	4.11143
61166	chr8	71557650	71559949	4.12591
61167	chr11	119050650	119052699	4.16335
61168	chr7	4834950	4836449	3.99488
61169	chr13	72622950	72625849	3.97271
61170	chr15	102957900	102960799	4.00617
61171	chr19	45162400	45165099	3.99504
61172	chr1	89927300	89929949	4.08376
61173	chr2	28919750	28920049	3.94593
61174	chr13	22004400	22005999	3.97687
61175	chr1	120593400	120594299	3.89334
61176	chr14	70287300	70288849	4.00385
61177	chr4	57299050	57300149	4.0179
61178	chr5	98165650	98167449	3.92972
61179	chr10	94943150	94944399	3.93835
61180	chr8	123115950	123119249	4.01269
61181	chr10	81256850	81258649	3.9937
61182	chr6	83714050	83717899	4.16905
61183	chr4	22482850	22483749	3.93014
61184	chr12	108701150	108702799	3.9312
61185	chr8	120114300	120115799	4.12647
61186	chr8	15010000	15011499	4.11654
61187	chr6	119329250	119331849	4.00395
61188	chr1	134645400	134648499	3.94137
61189	chr9	123677200	123679399	3.9932
61190	chr8	84934950	84937399	4.01287
61191	chr7	98835750	98837299	3.99142
61192	chr13	42301700	42303199	3.88905
61193	chr4	156254200	156256149	4.08912
61194	chr5	101665550	101669249	4.03973
61195	chr13	22008200	22009199	4.01551
61196	chr8	76898850	76901249	4.00078
61197	chr13	99899900	99900449	4.07839
61198	chr12	3807650	3809249	3.96922
61199	chr19	11092100	11092649	3.87949
61200	chr4	89301350	89303449	4.13304
61201	chr11	100958100	100959499	3.90764
61202	chr6	38635550	38637049	4.0033
61203	chr5	139584250	139586349	4.15915
61204	chr7	4842800	4844899	4.24099
61205	chr16	94076800	94078699	3.93654
61206	chr7	29171000	29172749	3.95044
61207	chr3	105451050	105452149	3.90861
61208	chr14	63263500	63267149	3.92046
61209	chr15	66284850	66286499	3.9214
61210	chr2	32740750	32742349	3.88767
61211	chr6	30178950	30180299	3.97658
61212	chr2	157914000	157916399	4.03333
61213	chr13	83715500	83720599	3.95801
61214	chr16	20620150	20621399	3.92075
61215	chr15	98771100	98773349	3.88528
61216	chr4	127971150	127972449	3.91352
61217	chr19	45064950	45067849	4.05036
61218	chr15	38470900	38472649	4.11837
61219	chr9	21038300	21039049	3.94334
61220	chr5	135855650	135858249	3.91222
61221	chr7	44335750	44338149	4.0757
61222	chr18	38208550	38211899	4.08515
61223	chr17	46453750	46456649	3.94617
61224	chr7	27445800	27447249	3.91591
61225	chr7	24637650	24638199	3.85846
61226	chr5	66746400	66747149	4.003
61227	chr2	143547200	143548849	4.13829
61228	chr7	47133000	47133749	4.09735
61229	chr4	136423900	136425149	3.94747
61230	chr7	28545950	28547149	3.89311
61231	chr19	25667200	25668799	3.93501
61232	chr18	52528000	52529749	3.984
61233	chr1	56978950	56981549	3.91462
61234	chr2	147360400	147364699	3.96772
61235	chr2	156613850	156615999	3.98999
61236	chr4	119734250	119735199	4.00178
61237	chr5	41764600	41768349	3.96668
61238	chr11	61342000	61343499	3.89741
61239	chr17	14279650	14280499	3.82367
61240	chr17	85472600	85474349	3.89807
61241	chr6	52248000	52250349	3.90348
61242	chr18	78046600	78049699	3.97927
61243	chr16	20733400	20735049	3.89241
61244	chr17	26438050	26439949	3.93321
61245	chr5	124860500	124861999	4.00738
61246	chr3	104781050	104782749	4.03263
61247	chr17	72603600	72604499	3.94199
61248	chr2	155774350	155775349	4.09078
61249	chr4	48050850	48052299	3.90217
61250	chr8	105289950	105290949	3.86931
61251	chr12	108327150	108328299	3.99514
61252	chr17	34671000	34673049	3.88577
61253	chr16	92497800	92499549	3.86217
61254	chr11	120659300	120661449	4.00788
61255	chr8	95676950	95679149	3.98522
61256	chr1	56974700	56975149	3.8669
61257	chr5	135249800	135251099	3.97049
61258	chr6	87730950	87733699	3.92587
61259	chr3	88207050	88210149	3.98133
61260	chr5	101765350	101766749	3.94566
61261	chr5	115192400	115194199	4.00759
61262	chr10	120200850	120201999	3.92063
61263	chrX	60895150	60896549	3.86604
61264	chr14	57103200	57106149	3.91053
61265	chr19	25669150	25670449	3.96088
61266	chr19	59459350	59460999	3.84466
61267	chr4	129985000	129988799	3.90871
61268	chr7	25179850	25181299	3.90656
61269	chr11	113619550	113620399	3.9026
61270	chr4	124482750	124483549	3.94663
61271	chr11	11113600	11116799	3.95124
61272	chr19	56872900	56875549	3.92445
61273	chr19	46146800	46148299	3.97415
61274	chr2	174297750	174299799	4.01281
61275	chr1	56981650	56985299	4.02729
61276	chr10	22811950	22813099	4.07348
61277	chr12	73047100	73051699	3.98885
61278	chr1	74802600	74807949	3.99099
61279	chr6	49822000	49824349	3.90206
61280	chr13	94705000	94707849	4.12708
61281	chr14	48651450	48655949	4.05318
61282	chr6	114282800	114284149	4.09314
61283	chr3	96356450	96357749	3.83936
61284	chr15	76231200	76232999	4.08618
61285	chr4	13744000	13744849	3.95464
61286	chr11	98345800	98347799	3.92982
61287	chr15	80671100	80672599	3.8753
61288	chr6	115135100	115135749	3.86242
61289	chr6	83702150	83704999	4.1238
61290	chr2	152080100	152081499	3.96704
61291	chr14	70176100	70178149	3.89021
61292	chr10	114800250	114801949	4.06616
61293	chr17	23678400	23680849	3.92279
61294	chr7	27407800	27408849	3.88239
61295	chr17	43628950	43630449	3.83979
61296	chr10	127326150	127328399	3.88108
61297	chr11	22005350	22009499	3.94671
61298	chr7	45699600	45700599	3.87427
61299	chr13	30749200	30750649	3.92617
61300	chr17	15829400	15830999	4.04474
61301	chr2	57109600	57112749	3.77676
61302	chr12	80517200	80518799	3.92449
61303	chr3	96347250	96350849	3.86232
61304	chr15	89498550	89499349	3.96718
61305	chr1	171063550	171066299	3.84553
61306	chr5	147221000	147224499	3.93915
61307	chr14	12337450	12340799	4.02994
61308	chr17	85486450	85488449	3.93833
61309	chr2	163917850	163920299	3.96236
61310	chr11	119045600	119047449	3.88956
61311	chr13	112986150	112987349	3.96232
61312	chr12	84640950	84642949	3.80739
61313	chr9	67047300	67049249	3.81915
61314	chr3	96474300	96475449	3.96841
61315	chr7	142082500	142083599	3.94947
61316	chr10	80013550	80015249	3.80163
61317	chr17	36157300	36158849	4.04066
61318	chr11	97571950	97574999	4.03311
61319	chr2	160364650	160366549	3.93907
61320	chr1	74793850	74795599	4.06353
61321	chr12	112876900	112878699	4.07422
61322	chr8	104539950	104542899	3.89541
61323	chr17	23698900	23700049	3.87694
61324	chr4	115944500	115945499	3.92876
61325	chr7	27396400	27397749	3.85536
61326	chr4	138250800	138251749	3.79284
61327	chr18	61035450	61036899	3.82779
61328	chr11	96170050	96171599	3.86827
61329	chr4	123104300	123106049	3.90494
61330	chr11	72960850	72962149	3.90607
61331	chr4	41730750	41732049	3.83558
61332	chr4	117492300	117496799	3.95832
61333	chr5	140607300	140609699	3.86737
61334	chr8	75213400	75215199	3.95711
61335	chr4	130138700	130140399	3.93128
61336	chr13	56221400	56224199	3.86233
61337	chr18	67132450	67134699	3.91892
61338	chr7	18991700	18993099	3.92936
61339	chr2	130696250	130696899	3.8553
61340	chr7	126950300	126951899	3.83993
61341	chr12	30883150	30885349	3.81508
61342	chr11	97017350	97022099	4.04013
61343	chr3	17787200	17789749	3.98746
61344	chr9	63133800	63135849	3.92308
61345	chr6	28133050	28134449	3.99669
61346	chr4	136248100	136250549	3.99075
61347	chr18	77793550	77795899	3.78753
61348	chr3	17785950	17787099	3.85197
61349	chr2	160359850	160363899	3.91689
61350	chrX	137103050	137105899	3.93903
61351	chr6	112488450	112490549	3.91312
61352	chr15	102979700	102980899	3.85843
61353	chr13	49145400	49147799	3.96755
61354	chr1	156204100	156206349	3.9915
61355	chr5	147751450	147752199	3.95573
61356	chr2	148405900	148408399	3.88501
61357	chr9	31911750	31916949	4.0282
61358	chr11	117199150	117200049	3.86065
61359	chr5	106446950	106452949	3.98336
61360	chr6	113494750	113495799	3.74733
61361	chr18	38212250	38212699	3.85679
61362	chr14	63260700	63263299	3.9502
61363	chr4	106622050	106623149	3.86408
61364	chr11	61021150	61024349	3.82782
61365	chr7	70328900	70330549	3.93195
61366	chr11	104131900	104134999	3.90815
61367	chr11	77514900	77516349	3.87127
61368	chr4	140243750	140248349	4.03328
61369	chr7	128418200	128419499	3.82541
61370	chr4	152281550	152283299	4.06243
61371	chr15	102961450	102963699	3.90826
61372	chr4	22486650	22488149	3.86376
61373	chr8	120971650	120973299	3.80652
61374	chr8	108694850	108697849	3.84944
61375	chr14	122470650	122471349	3.80855
61376	chr4	89295000	89298299	3.93338
61377	chr5	37242050	37243349	3.90267
61378	chr4	154854650	154856149	3.86458
61379	chr1	78209650	78212799	4.073
61380	chr8	78429050	78430349	3.84357
61381	chr15	86032400	86033949	3.87666
61382	chr17	34629450	34632799	3.97414
61383	chr12	100898250	100900049	3.7884
61384	chr10	127178000	127180749	3.95026
61385	chr13	83732000	83736199	3.74968
61386	chr6	23837950	23839149	4.04412
61387	chrX	49493300	49494049	3.78355
61388	chr2	79458100	79460299	3.8723
61389	chr8	123891650	123894549	3.88553
61390	chr12	70345500	70346949	3.9436
61391	chr7	13042900	13044949	3.78826
61392	chr11	115974450	115975799	3.88076
61393	chr13	98572150	98574399	3.81712
61394	chr5	52114400	52115449	3.8377
61395	chr7	34810100	34812499	4.01156
61396	chr9	87015600	87016549	3.77778
61397	chr17	36205250	36206599	3.93766
61398	chr2	73275250	73277299	3.91378
61399	chr19	44739850	44740699	3.72965
61400	chr12	80756350	80757699	3.90329
61401	chr7	19278900	19280349	3.89355
61402	chr9	91409050	91409449	3.86867
61403	chr11	115322600	115324099	3.80472
61404	chr6	23251200	23252149	3.72535
61405	chr9	91368300	91370899	3.77312
61406	chr5	64159000	64160049	3.82505
61407	chr19	4698500	4699799	3.90713
61408	chr2	148029550	148031999	3.88317
61409	chr4	139818200	139818699	3.86727
61410	chr4	152289850	152292299	3.85046
61411	chr3	105452750	105454199	3.94984
61412	chr9	91375400	91375899	3.69037
61413	chr11	96279400	96280299	3.89472
61414	chr9	98961000	98964599	3.94032
61415	chr4	114904700	114905699	3.86455
61416	chr13	54874100	54875199	3.80594
61417	chr14	79771650	79774449	3.9201
61418	chr19	11817700	11819799	3.83882
61419	chr18	66458950	66461199	3.80053
61420	chr1	75387500	75389399	3.7954
61421	chr12	31558050	31558799	3.78784
61422	chr10	81431100	81431799	3.88741
61423	chr6	99692650	99694549	3.9928
61424	chr7	79544250	79545649	3.89096
61425	chr17	87745250	87747699	3.70225
61426	chr4	134342400	134344149	3.89825
61427	chr4	22485500	22486299	3.9646
61428	chr15	100728650	100730599	3.71916
61429	chr19	59193900	59195099	3.87137
61430	chr15	48790600	48792649	3.84359
61431	chr8	84413850	84416599	3.77
61432	chr11	103808850	103811349	3.89472
61433	chr8	57319250	57321099	3.80697
61434	chr13	51565950	51569299	3.86357
61435	chr4	126300800	126301899	3.81849
61436	chr4	150048150	150049549	3.95172
61437	chr1	74799850	74801499	3.97984
61438	chr5	28467750	28468399	3.95239
61439	chrX	36327600	36329599	3.77137
61440	chr17	25819150	25820649	3.80731
61441	chr14	70890150	70891899	3.75416
61442	chr1	154725400	154726649	3.8835
61443	chr15	35293750	35295749	3.79789
61444	chr2	69584000	69586699	3.91675
61445	chr9	102689950	102690799	3.83039
61446	chrX	71663600	71665949	3.86525
61447	chr6	99725000	99727099	3.91289
61448	chr19	6847100	6848199	3.90118
61449	chr6	52261150	52261599	3.83943
61450	chr4	41728900	41730699	3.90068
61451	chr1	33906450	33907099	3.71422
61452	chr9	95558000	95559499	3.77286
61453	chr1	75219350	75220599	3.70054
61454	chr10	41071000	41071899	3.75422
61455	chr13	119966300	119967899	3.78747
61456	chr15	79507800	79508149	3.80666
61457	chr18	76060050	76060499	3.94702
61458	chr7	79052150	79052749	3.80916
61459	chr7	51622000	51628349	3.86916
61460	chr19	25623800	25626399	3.7501
61461	chr3	93442550	93444549	3.85433
61462	chr13	94702050	94704399	3.86814
61463	chr9	91392850	91396049	3.96044
61464	chr2	160911350	160912349	3.6726
61465	chr1	78207450	78209299	3.9104
61466	chr1	181351650	181352449	3.75671
61467	chr2	181313100	181314199	3.83444
61468	chr17	15374050	15378499	3.81339
61469	chr6	39116850	39119199	3.90186
61470	chr5	118168600	118169699	3.86129
61471	chr8	92960000	92961849	3.941
61472	chr6	126642100	126644749	3.82809
61473	chr1	131243900	131245799	3.92708
61474	chr9	89909850	89911349	3.76466
61475	chr13	48730450	48732299	3.80144
61476	chr11	103770800	103775999	4.05713
61477	chrX	93283800	93284849	3.7885
61478	chr10	94945000	94946449	3.86456
61479	chr8	122229350	122230349	3.69679
61480	chr6	77243950	77245599	3.91659
61481	chr7	110625700	110629549	3.85669
61482	chrX	7921300	7923949	3.8457
61483	chr1	63260150	63264799	3.75048
61484	chr13	73262850	73265649	3.79472
61485	chr7	138940150	138942549	3.75028
61486	chr7	140921200	140924199	3.83724
61487	chr10	90828300	90830199	3.84935
61488	chr10	19849000	19850849	3.89417
61489	chr2	18695000	18696749	3.78333
61490	chr18	37142550	37145249	3.70711
61491	chr7	27371150	27373549	3.89051
61492	chr1	155728300	155731099	3.8845
61493	chr7	19576550	19578549	3.92261
61494	chr11	103332950	103334099	3.79874
61495	chr1	181352650	181354749	3.72973
61496	chr9	57940600	57942399	3.80895
61497	chr15	98000200	98001849	3.81021
61498	chr19	4476050	4477449	3.7068
61499	chr4	133600100	133602249	3.74646
61500	chr7	143501250	143503849	3.74402
61501	chr2	132028200	132029799	3.85099
61502	chr18	86395400	86396399	3.65513
61503	chr9	111313700	111314299	3.72518
61504	chr5	73006450	73008199	3.82188
61505	chr10	50894850	50898099	3.8693
61506	chr8	13493100	13494449	3.80274
61507	chr18	34861700	34863199	3.65765
61508	chr9	91366350	91368199	3.69564
61509	chr14	57057500	57059399	3.86015
61510	chr7	19021150	19023849	3.86583
61511	chr10	81460550	81461499	3.7272
61512	chr9	107229800	107231699	3.83086
61513	chr2	9873850	9875649	3.79211
61514	chr4	46534300	46536099	3.75354
61515	chr5	67217650	67219599	3.77972
61516	chr9	21014700	21016299	3.89838
61517	chr3	129194850	129196449	3.956
61518	chr13	56437500	56439799	3.84634
61519	chr15	102990800	102993149	3.90268
61520	chr19	53676100	53677549	3.89561
61521	chr2	131053100	131055399	3.69756
61522	chr2	150687050	150689349	3.71828
61523	chr2	164855900	164857149	3.75866
61524	chr7	18962450	18964599	3.98135
61525	chr7	144894750	144895899	3.85757
61526	chr8	13973600	13974299	3.7453
61527	chr5	113333600	113336849	3.89498
61528	chr13	31617450	31618499	3.81834
61529	chr13	38151600	38152799	3.77415
61530	chr17	48094550	48096249	3.96662
61531	chr1	136952150	136953599	3.81491
61532	chr13	119963200	119964199	3.76383
61533	chr2	29750850	29752249	3.82822
61534	chr5	98185650	98188149	3.72185
61535	chr8	87473100	87474849	3.80937
61536	chr7	4775800	4777449	3.85971
61537	chr11	102761100	102762599	3.77565
61538	chr12	113140700	113141849	3.78614
61539	chr17	29321800	29322499	3.7923
61540	chr4	114843350	114844049	3.76791
61541	chr4	124574900	124576799	3.74233
61542	chr3	129210650	129213649	3.71901
61543	chr6	67535600	67536349	3.79269
61544	chr10	121309950	121312349	3.93915
61545	chr10	87487350	87488999	3.73341
61546	chr15	102994500	102996349	3.82812
61547	chr6	6868150	6870449	3.91581
61548	chr18	75820550	75822449	3.95146
61549	chr9	49340550	49340949	3.78865
61550	chr1	22532200	22532549	3.69536
61551	chr1	75263400	75264799	3.76393
61552	chr11	11684200	11687499	3.74181
61553	chr2	168081300	168082699	3.71603
61554	chr16	97168750	97170649	3.73763
61555	chr1	69105100	69106249	3.78274
61556	chr17	36215300	36216549	3.75338
61557	chr11	87763800	87766049	3.87146
61558	chr10	85927450	85928499	3.69354
61559	chr7	46376000	46378799	3.71298
61560	chr17	85454450	85457749	3.76388
61561	chr10	7392050	7393699	3.6428
61562	chr5	120424350	120425249	3.74405
61563	chr2	90885750	90887649	3.80383
61564	chr7	142657650	142658049	3.78734
61565	chr10	80136000	80137699	3.7369
61566	chr10	50908450	50910899	3.85286
61567	chr3	123445900	123447349	3.86157
61568	chr14	48671800	48674649	3.83917
61569	chr12	111406750	111407449	3.82273
61570	chr7	19403150	19405149	3.68499
61571	chr13	120046150	120047699	3.86308
61572	chr17	48096300	48097399	3.72525
61573	chr8	35825050	35826249	3.73031
61574	chr10	26077650	26078549	3.72768
61575	chr15	89377600	89380199	3.71414
61576	chr3	96386900	96389049	3.69574
61577	chr9	91388500	91389999	3.83245
61578	chrX	137097900	137098949	3.76148
61579	chr3	88210250	88212899	3.82377
61580	chr14	48664100	48664449	3.71973
61581	chr12	112678850	112680599	3.7519
61582	chr9	119577150	119579549	3.77602
61583	chr16	90830200	90831999	3.77338
61584	chrX	140599500	140600649	3.79512
61585	chr13	98504800	98506999	3.7318
61586	chr18	76843250	76845049	3.6778
61587	chr8	120734950	120735999	3.87346
61588	chr5	37028750	37030749	3.81916
61589	chr17	24687350	24689599	3.87951
61590	chr16	35659600	35660849	3.82308
61591	chr17	34670500	34670899	3.77752
61592	chr7	142966900	142968249	3.72541
61593	chr3	27370650	27373299	3.75799
61594	chr5	140606300	140607249	3.63221
61595	chr7	45163000	45166199	3.77867
61596	chr11	57826900	57827349	3.68528
61597	chr16	5130450	5132999	3.7709
61598	chr6	114041100	114043399	3.72683
61599	chr1	34750650	34752149	3.94456
61600	chr2	29039650	29041699	3.68673
61601	chr12	58211150	58213699	3.69992
61602	chr2	164166900	164172199	3.82556
61603	chr13	117602800	117603999	3.75058
61604	chr4	55530700	55532199	3.72342
61605	chr8	84913350	84913899	3.71646
61606	chr15	98675250	98677149	3.84907
61607	chr11	80299650	80300199	3.72332
61608	chr2	130360550	130361049	3.61414
61609	chr9	65628500	65629449	3.7465
61610	chr11	57827500	57832149	3.91516
61611	chr2	109676150	109677699	3.70965
61612	chr19	45240750	45244149	3.71174
61613	chr16	21247550	21248849	3.73966
61614	chr14	30352000	30353249	3.71656
61615	chr2	33643600	33644849	3.67448
61616	chr13	112992650	112994449	3.75457
61617	chr10	122448200	122449449	3.68752
61618	chr2	180499100	180501199	3.7557
61619	chr7	35116750	35117999	3.69106
61620	chr11	100759250	100760099	3.64965
61621	chr2	146832700	146833599	3.67587
61622	chr7	44586700	44588849	3.65995
61623	chr18	86713500	86714049	3.84803
61624	chr5	35380250	35383599	3.66211
61625	chr1	127679100	127679899	3.84094
61626	chr7	3413500	3416299	3.7424
61627	chr17	8436950	8437299	3.62965
61628	chr8	124432600	124434099	3.75941
61629	chr16	4419150	4419699	3.66706
61630	chr7	78578600	78579899	3.79414
61631	chr11	75652250	75653649	3.64821
61632	chr1	63264900	63269349	3.95414
61633	chr4	139850750	139853199	3.74317
61634	chr6	23260250	23261599	3.73751
61635	chr1	14754750	14757399	3.71239
61636	chr17	8388900	8389749	3.67601
61637	chr19	59195250	59196399	3.65161
61638	chr11	107792450	107793849	3.79482
61639	chr2	5713600	5714049	3.68927
61640	chr12	56697950	56699249	3.86735
61641	chr11	95223850	95224549	3.66386
61642	chr8	76897300	76898799	3.61574
61643	chr14	29719800	29721799	3.70292
61644	chr18	40256900	40257549	3.6037
61645	chr4	21682050	21683599	3.72555
61646	chr2	143546550	143546899	3.77861
61647	chr10	19360550	19363299	3.82329
61648	chr16	94328100	94329849	3.70384
61649	chr10	75317550	75318199	3.76294
61650	chr1	89940800	89943099	3.70873
61651	chr7	27395400	27396099	3.86928
61652	chr16	18775850	18778449	3.70246
61653	chr7	24953450	24956249	3.61664
61654	chr10	79612250	79613549	3.96874
61655	chr14	68082000	68083599	3.7113
61656	chr7	79592150	79594049	3.66949
61657	chr10	42575500	42576249	3.76682
61658	chr18	80984200	80985449	3.78722
61659	chr4	124860900	124862749	3.71502
61660	chr1	13125850	13127799	3.71566
61661	chr6	28981350	28982449	3.71331
61662	chr7	112954150	112955849	3.71977
61663	chr1	167001500	167002549	3.67258
61664	chr2	105690200	105691699	3.6968
61665	chr11	72488550	72489749	3.73807
61666	chr9	114056650	114058449	3.72077
61667	chr17	69439500	69440249	3.83821
61668	chr5	139324400	139325549	3.71866
61669	chr1	124043650	124046649	3.76657
61670	chr11	120530400	120532599	3.73323
61671	chr11	74610450	74611599	3.76811
61672	chr13	76054800	76056299	3.71335
61673	chr1	87185250	87186899	3.8648
61674	chr1	42688700	42690599	3.81479
61675	chr16	13447900	13449999	3.76381
61676	chr9	56796100	56797849	3.71958
61677	chrX	111894750	111895449	3.63816
61678	chr19	42432400	42433549	3.69384
61679	chr17	35469250	35471599	3.78744
61680	chr15	75741100	75742249	3.73102
61681	chr13	36723100	36726299	3.84154
61682	chr17	25950700	25953349	3.71013
61683	chr4	103619550	103620449	3.67651
61684	chr7	99626000	99628149	3.74016
61685	chr13	113035000	113035899	3.58653
61686	chr3	154331100	154334749	3.80149
61687	chr19	59461200	59465449	3.80917
61688	chr15	82206550	82208149	3.71857
61689	chr2	147369350	147372749	3.75646
61690	chr15	47900600	47900849	3.53232
61691	chr13	54749800	54750649	3.57703
61692	chr4	148403250	148405199	3.68331
61693	chr5	139599200	139601599	3.83255
61694	chr11	114785500	114786899	3.79865
61695	chr3	107100450	107102649	3.6713
61696	chr7	24933550	24934549	3.80064
61697	chr5	73406000	73407049	3.69381
61698	chr4	41695650	41697049	3.81686
61699	chr18	39488000	39489199	3.824
61700	chr1	120609100	120611049	3.81939
61701	chr2	165594900	165596249	3.8012
61702	chr8	70493550	70494299	3.72789
61703	chr15	92396500	92397749	3.68381
61704	chr18	61013150	61015199	3.77038
61705	chr15	30646400	30647499	3.69686
61706	chr16	35541450	35543249	3.8837
61707	chr7	109780400	109781549	3.57916
61708	chr19	36055850	36057499	3.69394
61709	chr8	92365600	92366799	3.59688
61710	chr15	98800000	98800849	3.5827
61711	chr7	70332250	70333699	3.69507
61712	chr1	74901100	74901699	3.68974
61713	chr11	98340500	98342049	3.70918
61714	chr10	22813450	22814199	3.66456
61715	chr6	91842600	91844049	3.65362
61716	chr6	85408850	85410499	3.68876
61717	chr2	152626000	152627349	3.62748
61718	chr2	57108600	57109399	3.72237
61719	chr13	116301150	116304599	3.81706
61720	chr9	108827350	108828349	3.62312
61721	chr2	168049700	168050149	3.53258
61722	chr18	75695550	75696499	3.8991
61723	chr14	29722450	29724249	3.62904
61724	chr13	105443750	105445549	3.76068
61725	chr2	26196550	26197899	3.65463
61726	chr5	138819700	138822299	3.76182
61727	chr4	46037700	46040649	3.62202
61728	chr1	153186000	153186499	3.61082
61729	chr19	50677150	50677799	3.58737
61730	chr10	43020800	43023099	3.82683
61731	chr3	100487050	100489149	3.71208
61732	chr7	66425300	66428749	3.85283
61733	chr5	53211950	53213449	3.6127
61734	chr6	52268950	52270649	3.71317
61735	chr1	63255200	63255899	3.72323
61736	chr19	47179200	47181099	3.70783
61737	chr1	171192400	171194699	3.66421
61738	chr4	149587400	149588899	3.71505
61739	chr7	63754050	63755299	3.75972
61740	chr7	140081350	140082349	3.6196
61741	chr8	32882550	32884049	3.82485
61742	chr11	107794550	107796049	3.68805
61743	chr14	79770000	79771149	3.77485
61744	chr5	75977500	75978299	3.65417
61745	chr19	6420300	6420649	3.52162
61746	chr17	34212700	34214749	3.70154
61747	chr15	34837750	34838899	3.647
61748	chr13	78177800	78179949	3.65332
61749	chr17	34263600	34265049	3.62485
61750	chr19	59074550	59075949	3.55422
61751	chr2	115853200	115855249	3.67355
61752	chr3	96595050	96596949	3.67685
61753	chr17	6781700	6782649	3.66818
61754	chr19	58455150	58456449	3.75571
61755	chr5	143369250	143373899	3.62379
61756	chr18	21650350	21653249	3.74536
61757	chr6	83757850	83758399	3.69429
61758	chr16	31427850	31428749	3.6095
61759	chr10	80499850	80501249	3.57222
61760	chr7	3302850	3304749	3.596
61761	chr19	58453050	58454349	3.77829
61762	chr17	56829600	56830499	3.57917
61763	chr7	79791400	79793799	3.67382
61764	chr1	72873500	72874149	3.57056
61765	chr1	42693000	42694449	3.79586
61766	chr2	131170650	131172799	3.6355
61767	chr5	35758050	35758949	3.66738
61768	chr11	4761650	4762649	3.62027
61769	chr2	57103900	57106449	3.63914
61770	chr8	78425650	78426199	3.67742
61771	chr5	31135200	31136449	3.7352
61772	chr7	65862600	65863699	3.63677
61773	chr12	118844600	118846599	3.71506
61774	chr5	36396900	36397549	3.55879
61775	chr13	112990850	112991949	3.60173
61776	chr10	19851000	19852349	3.63104
61777	chr19	46136400	46137399	3.60077
61778	chr5	116591900	116593099	3.78729
61779	chr1	180482400	180483299	3.63217
61780	chr3	88204850	88206999	3.6322
61781	chrX	152144700	152145499	3.515
61782	chr4	62479850	62480349	3.59449
61783	chr19	37692750	37694249	3.68868
61784	chr7	142081800	142082299	3.58679
61785	chr19	44682600	44684599	3.72422
61786	chr2	57101500	57103749	3.71459
61787	chr10	50891950	50894199	3.69465
61788	chr5	139579700	139581849	3.73709
61789	chr11	85828500	85831499	3.68613
61790	chrX	37048150	37049799	3.78386
61791	chr1	91344100	91346199	3.66597
61792	chr10	80985100	80986349	3.5903
61793	chr1	75449450	75451549	3.85588
61794	chr1	75421800	75423299	3.55079
61795	chr3	96389450	96390599	3.9528
61796	chr5	143292650	143294449	3.59783
61797	chr13	71967300	71968649	3.76942
61798	chr11	97499450	97501299	3.69111
61799	chr9	91399800	91402299	3.73986
61800	chr8	121071150	121071749	3.74052
61801	chr17	25496050	25497149	3.65599
61802	chr9	98031500	98032699	3.72596
61803	chr7	70337300	70337899	3.57721
61804	chr2	94246900	94247349	3.71355
61805	chr2	164857300	164858599	3.63247
61806	chr17	85798150	85800299	3.55044
61807	chr17	56123700	56124749	3.60804
61808	chr17	56756550	56757449	3.54906
61809	chr4	44704900	44707249	3.71187
61810	chr5	63648500	63650799	3.58389
61811	chr9	64384300	64385199	3.62516
61812	chr7	49631350	49633049	3.75395
61813	chr13	108214650	108216099	3.71089
61814	chr3	89392000	89393199	3.50922
61815	chr13	23395000	23395599	3.7962
61816	chr13	22006650	22008149	3.701
61817	chr2	29746900	29747949	3.61798
61818	chr1	13124100	13125799	3.57416
61819	chr2	131546600	131547799	3.57847
61820	chr13	34651550	34653199	3.55714
61821	chr3	40531950	40532249	3.51099
61822	chrX	107677000	107677299	3.57721
61823	chr5	73648600	73650399	3.6095
61824	chr13	119967950	119969049	3.66306
61825	chr19	46148700	46149699	3.69323
61826	chr9	89908600	89909649	3.72133
61827	chr2	130295700	130296899	3.68689
61828	chr7	4150550	4151949	3.74184
61829	chr3	125937050	125938249	3.66025
61830	chr5	137028650	137029899	3.54818
61831	chr1	171084900	171086649	3.70713
61832	chr8	11478900	11480549	3.80339
61833	chr7	131966450	131967849	3.60873
61834	chr14	33923700	33924649	3.57462
61835	chr2	92058850	92059849	3.65481
61836	chr15	75565200	75568299	3.58348
61837	chr11	101962800	101965299	3.682
61838	chrX	93298900	93300149	3.80082
61839	chr4	143349950	143351099	3.55732
61840	chr4	11383400	11384049	3.54628
61841	chr1	19102350	19104899	3.67913
61842	chr8	121123900	121125149	3.71471
61843	chr14	68122650	68123349	3.60102
61844	chr10	44526850	44528999	3.74237
61845	chr3	157566500	157568699	3.66285
61846	chr13	120097100	120098799	3.69207
61847	chr4	115954650	115955749	3.54571
61848	chr14	70626750	70627849	3.69006
61849	chr1	72535450	72536799	3.74936
61850	chr7	82336350	82337199	3.74662
61851	chr11	7212150	7213749	3.74098
61852	chr5	76856000	76857149	3.56222
61853	chr5	131305850	131307349	3.66962
61854	chr6	113282500	113284099	3.58516
61855	chr5	101537950	101539949	3.58769
61856	chr9	31130200	31132899	3.83591
61857	chr1	89930050	89931049	3.66422
61858	chr12	80691750	80693999	3.66378
61859	chr6	67533650	67535049	3.57106
61860	chr2	84888750	84889749	3.55853
61861	chr12	108328450	108328999	3.73742
61862	chr2	73277450	73278149	3.68892
61863	chr19	25670550	25672099	3.68403
61864	chr5	52112450	52113299	3.6528
61865	chr9	102351700	102352699	3.61327
61866	chr6	124997050	124997599	3.71472
61867	chr12	112928150	112929399	3.58659
61868	chr14	122467400	122468899	3.66269
61869	chr6	82401400	82402649	3.52557
61870	chr15	89557100	89559099	3.65965
61871	chr18	64339100	64339699	3.57325
61872	chr2	168910800	168913099	3.69176
61873	chr7	25177800	25179549	3.61713
61874	chr6	142414500	142415149	3.75642
61875	chr2	19658450	19659999	3.58031
61876	chr8	120889250	120890549	3.82906
61877	chr11	58947900	58948849	3.55135
61878	chr11	57832450	57834799	3.76294
61879	chr15	98802000	98804099	3.69538
61880	chr12	111484600	111485799	3.69863
61881	chr17	33998750	34000149	3.65611
61882	chr11	102665100	102666549	3.50479
61883	chr4	123182450	123183149	3.67021
61884	chr4	133250950	133251899	3.60473
61885	chr8	17532550	17535349	3.57422
61886	chr18	24653900	24655549	3.74608
61887	chr12	111429800	111430349	3.63881
61888	chr19	27216150	27216749	3.57704
61889	chr4	116015800	116018049	3.70457
61890	chr7	19064700	19065899	3.68182
61891	chr13	43785400	43786199	3.60371
61892	chr17	85488500	85490649	3.61652
61893	chr9	44133900	44135899	3.91485
61894	chr5	101647000	101648599	3.56739
61895	chr13	25055850	25056799	3.6568
61896	chr8	92673900	92675449	3.62938
61897	chr1	74947500	74948499	3.69148
61898	chr19	25606250	25607449	3.70097
61899	chr4	150032050	150034599	3.64554
61900	chr3	89318750	89322199	3.55632
61901	chr14	104471350	104472549	3.58404
61902	chr18	89768500	89769199	3.50968
61903	chr12	56616650	56617399	3.55749
61904	chr9	91356000	91358999	3.56677
61905	chr7	99268500	99269849	3.58695
61906	chr17	47436100	47437399	3.64335
61907	chr8	120893100	120895849	3.61362
61908	chr16	11984250	11986149	3.63904
61909	chr8	91803300	91804899	3.5692
61910	chr5	28456950	28458699	3.79759
61911	chr8	123410750	123412699	3.5721
61912	chr11	67920650	67921599	3.45388
61913	chr6	84585450	84586199	3.66812
61914	chr7	19469150	19470049	3.56761
61915	chr2	168589250	168590499	3.76974
61916	chr3	88024850	88025299	3.58218
61917	chr18	64346450	64346949	3.45457
61918	chr15	84445900	84446599	3.47917
61919	chr11	74522850	74524199	3.64864
61920	chr1	12644650	12645049	3.50026
61921	chr1	42702500	42704149	3.65532
61922	chrX	99820900	99821749	3.4521
61923	chr7	49677600	49679399	3.66854
61924	chr2	25241450	25242899	3.59718
61925	chr15	102983500	102984449	3.59958
61926	chr8	120958000	120958299	3.46651
61927	chr10	128588100	128588699	3.47073
61928	chr6	55117100	55117999	3.72801
61929	chr11	53462600	53464199	3.61684
61930	chr13	10359250	10361299	3.57454
61931	chr7	82334800	82336149	3.57396
61932	chr12	101717550	101718099	3.67291
61933	chr7	24636200	24637399	3.59888
61934	chr3	121263400	121264399	3.51619
61935	chr19	44723050	44724399	3.62139
61936	chr4	117132500	117133599	3.61938
61937	chr3	68870350	68871099	3.45681
61938	chr7	70370400	70370749	3.55099
61939	chr2	174285500	174286999	3.56683
61940	chr9	20868450	20870149	3.5364
61941	chr10	52020600	52022299	3.53058
61942	chr2	160359400	160359699	3.52686
61943	chr9	103111900	103113449	3.47808
61944	chr17	31635700	31637199	3.55957
61945	chr1	19211700	19212299	3.56354
61946	chr4	120285500	120287499	3.62364
61947	chr15	76197400	76198599	3.54989
61948	chr8	105277800	105279499	3.61734
61949	chr2	34912100	34914699	3.62498
61950	chr8	47409050	47411549	3.72164
61951	chr13	112994550	112995399	3.51162
61952	chrX	7926900	7927649	3.51667
61953	chr15	100600200	100601349	3.68551
61954	chr11	95201750	95202449	3.60164
61955	chr4	115931300	115933049	3.51327
61956	chr2	180773750	180774149	3.58653
61957	chr3	34639700	34640699	3.52886
61958	chr10	22817500	22817999	3.56599
61959	chr11	30023650	30025249	3.65052
61960	chr4	57141600	57142999	3.67591
61961	chr19	59450450	59451399	3.76243
61962	chr4	126737000	126737899	3.51439
61963	chr3	17785100	17785799	3.63781
61964	chr14	8316750	8318099	3.68941
61965	chr11	59134550	59136799	3.78594
61966	chr2	180333150	180334799	3.52476
61967	chr12	101027100	101028899	3.75296
61968	chr4	134370400	134372349	3.76053
61969	chr13	116313750	116314749	3.62182
61970	chr3	13473300	13474149	3.53317
61971	chr17	34212000	34212599	3.49334
61972	chr2	158668500	158669249	3.44866
61973	chr4	154080950	154081999	3.57061
61974	chr12	11150150	11150949	3.48673
61975	chr12	73585100	73586199	3.5329
61976	chr6	31564500	31565599	3.62658
61977	chr10	89343950	89345349	3.46829
61978	chr19	23892400	23893199	3.45406
61979	chr17	36248600	36249249	3.57425
61980	chr7	79539550	79540649	3.55132
61981	chr12	112130750	112131499	3.49725
61982	chr6	113481400	113483049	3.5558
61983	chr19	6419000	6420199	3.46728
61984	chr11	79711500	79712899	3.57281
61985	chr2	180104600	180105549	3.51389
61986	chr3	84477850	84481149	3.61875
61987	chr14	122489750	122490349	3.57285
61988	chr10	128934000	128934999	3.51013
61989	chr13	22014950	22015599	3.58231
61990	chr1	184734950	184736649	3.56203
61991	chr11	79590550	79591049	3.51562
61992	chr13	114459050	114460549	3.62167
61993	chr10	128588800	128590049	3.62626
61994	chr9	69756100	69756949	3.46097
61995	chr5	98254550	98256649	3.56548
61996	chr1	132541850	132543849	3.43824
61997	chr9	73102850	73104199	3.41997
61998	chr17	44733200	44735449	3.57727
61999	chr1	162475900	162477299	3.55491
62000	chr10	83336000	83337199	3.62957
62001	chr11	97551500	97552199	3.5105
62002	chr6	52244550	52246599	3.56667
62003	chr11	118907000	118909549	3.63226
62004	chr9	37527600	37530949	3.72963
62005	chr2	124090250	124091049	3.63385
62006	chr11	70228950	70230499	3.77113
62007	chrX	137110350	137112249	3.62573
62008	chr2	126552000	126554349	3.57779
62009	chr13	55419450	55421299	3.65854
62010	chr7	24950650	24951899	3.46746
62011	chr6	145862250	145863299	3.47468
62012	chr2	162659600	162662399	3.51794
62013	chr19	23141600	23142949	3.69451
62014	chr5	72580200	72581449	3.40151
62015	chr7	65156550	65157949	3.54849
62016	chr15	78409500	78409949	3.45328
62017	chr2	38348500	38349749	3.55982
62018	chr5	120301250	120303299	3.5113
62019	chr2	164400150	164402649	3.52922
62020	chr8	89043850	89045999	3.5988
62021	chr16	17802000	17803749	3.50287
62022	chr11	98332550	98333599	3.52101
62023	chr12	49386800	49387349	3.67713
62024	chr4	152287300	152288049	3.60428
62025	chr7	19796300	19797049	3.47703
62026	chr18	11047700	11050549	3.58904
62027	chr7	25367900	25368949	3.50377
62028	chr15	75731650	75732699	3.48644
62029	chr18	7002300	7003599	3.67204
62030	chr9	69668650	69671149	3.72691
62031	chr11	119041700	119043399	3.43019
62032	chrX	58033800	58034549	3.57835
62033	chr15	100871350	100873149	3.56339
62034	chr12	9575350	9576799	3.50506
62035	chr14	104457700	104459949	3.5901
[truncated: 7,832 more rows]

## Sheet: K27me3_GBR_overlap
Chromosome	Start	End	GBR_Type
chr2	33543700	33544699	HH-dep
chr2	74667700	74668699	HH-dep
chr2	74668400	74669399	HH-dep
chr2	74673250	74674249	HH-dep
chr2	74679450	74680449	HH-dep
chr2	109677100	109678099	HH-dep
chr4	117095500	117096599	HH-dep
chr4	117494450	117495449	HH-dep
chr8	70494250	70495249	HH-dep
chr8	120838650	120839649	HH-dep
chr10	127339000	127342549	HH-dep
chr13	63562500	63569599	HH-dep
chr13	63572450	63574449	HH-dep
chr15	35295124	35296123	HH-dep
chr15	35295674	35296673	HH-dep
chr15	35296274	35297273	HH-dep
chr1	132189950	132190949	HH-sens
chr2	74673774	74674773	HH-sens
chr2	74681550	74682549	HH-sens
chr2	74682624	74683623	HH-sens
chr2	74683174	74684173	HH-sens
chr4	114842924	114843923	HH-sens
chr4	131920674	131921673	HH-sens
chr4	131921100	131922099	HH-sens
chr8	57333100	57334949	HH-sens
chr8	89042300	89044649	HH-sens
chr15	102746450	102747449	HH-sens
chr17	15829924	15830923	HH-sens
chr18	80985974	80986973	HH-sens
chr18	80986450	80987449	HH-sens
chr18	80987074	80988073	HH-sens
chr1	78188900	78189899	Stable
chr2	33636424	33637423	Stable
chr2	33640774	33641773	Stable
chr2	38347650	38348649	Stable
chr2	74684824	74685823	Stable
chr2	74686200	74687199	Stable
chr2	74697300	74698299	Stable
chr2	74734150	74735149	Stable
chr2	74752700	74753699	Stable
chr3	66982124	66983123	Stable
chr3	99248350	99249349	Stable
chr4	32983100	32984149	Stable
chr4	55531950	55532949	Stable
chr4	134253100	134254099	Stable
chr5	15934200	15935199	Stable
chr5	119800000	119800999	Stable
chr5	119803524	119804523	Stable
chr5	124861950	124862949	Stable
chr5	138997100	138998099	Stable
chr5	139619024	139620023	Stable
chr6	52157900	52158899	Stable
chr6	52216700	52218049	Stable
chr6	52221700	52222699	Stable
chr6	52225950	52227049	Stable
chr6	52228924	52229923	Stable
chr6	52230174	52231173	Stable
chr6	52244424	52245423	Stable
chr6	52245574	52246573	Stable
chr7	81212400	81213399	Stable
chr7	81212900	81213899	Stable
chr7	142657524	142658523	Stable
chr7	142664400	142665399	Stable
chr8	11008950	11010049	Stable
chr8	57328000	57328999	Stable
chr8	70492774	70493773	Stable
chr8	70495224	70496223	Stable
chr8	91805050	91806049	Stable
chr8	92356100	92357099	Stable
chr8	92356674	92357673	Stable
chr8	92357200	92358199	Stable
chr8	92357774	92358773	Stable
chr8	120536750	120538149	Stable
chr9	98973024	98974023	Stable
chrX	11806700	11807699	Stable
chrX	11807124	11808123	Stable
chrX	12079600	12080599	Stable
chrX	12088050	12089049	Stable
chrX	12135650	12136899	Stable
chrX	94234450	94235449	Stable
chr10	81430150	81431149	Stable
chr10	103028150	103029149	Stable
chr11	57827074	57828073	Stable
chr11	69800250	69801299	Stable
chr11	69935224	69936223	Stable
chr11	85829724	85830723	Stable
chr11	85832024	85833023	Stable
chr11	85833224	85834223	Stable
chr11	94473724	94474723	Stable
chr11	96284400	96285399	Stable
chr11	96284800	96285799	Stable
chr11	119042450	119043449	Stable
chr11	119052600	119053649	Stable
chr12	73044074	73045073	Stable
chr12	73045300	73046299	Stable
chr12	104472850	104473899	Stable
chr13	98503250	98505099	Stable
chr14	61682024	61683023	Stable
chr14	122463850	122464849	Stable
chr14	122464600	122465599	Stable
chr17	47923374	47924373	Stable
chr17	47973800	47974799	Stable
chr17	47974724	47975723	Stable
chr17	47975500	47976499	Stable
chr18	36280850	36281849	Stable
chr18	36286024	36287023	Stable
chr18	80712850	80713899	Stable
chr18	80714524	80715523	Stable
chr19	59458124	59459123	Stable
