# Supplementary material for: GLI transcriptional repression regulates tissue-specific enhancer activity in response to Hedgehog signaling
Source: eLife. 2020 Jan 28;9:e50670. doi: 10.7554/eLife.50670 (PMC6986877; doi:10.7554/eLife.50670)
Supplement: Figure 2—source data 3. — H3K4me2 called peaks with a FDR < 0.05 from two replicates from WT and Shh-/- E10.5 forelimbs. For each peak, the assigned Peak ID, coordinates, peak type, fold change normalized to input for WT and Shh-/- samples and fold change of WT over. Shh-/- are listed. Additional tabs include sorted files for each peak type. Under the ‘GLI3 binding’ column, ‘TRUE’ implies overlap with a GBR, while ‘FALSE’ indicates no overlap. [file elife-50670-fig2-data3.xlsx]

## Sheet: All H3K4me2 peaks
Peak_ID	Chromosome	Start	End	Gli3_binding	Type	WTinput_FC	WTinput_adjPval	SHHnullinput_FC	SHHnullinput_adjPval	WTSHHnull_FC	WTSHHnull_adjPval
69868	chr1	3670700	3672449	FALSE	Stable	3.61957	2.72055e-06	3.4757	0.000156406	-0.206181	0.999993
69869	chr1	4491900	4492199	FALSE	Stable	3.65729	2.3418e-06	1.86035	0.0247603	-0.43777	0.999993
69870	chr1	4493150	4493249	FALSE	other	2.36792	0.000948352	1.42782	0.0834011	0.484953	0.999993
69871	chr1	4493400	4493749	FALSE	Stable	2.39208	0.000844743	3.33633	0.00021785	-0.113078	0.999993
69872	chr1	4496950	4497549	FALSE	Stable	2.22952	0.00180989	2.7216	0.00137472	-0.0822193	0.999993
69873	chr1	4571150	4572299	TRUE	Stable	3.44776	5.53431e-06	2.61931	0.00195339	0.0120696	0.999993
69874	chr1	4689100	4689549	FALSE	other	1.16239	0.101585	2.50256	0.0029423	-0.140156	0.999993
69875	chr1	4784800	4785499	FALSE	Stable	3.31064	1.00088e-05	2.19378	0.00849161	0.502788	0.999993
69876	chr1	4785950	4786449	FALSE	Stable	3.19783	1.66251e-05	3.12585	0.000379415	-0.0920215	0.999993
69877	chr1	4807150	4807899	FALSE	Stable	2.75496	0.000142396	2.86002	0.000863113	-0.0358639	0.999993
69878	chr1	4808150	4808999	FALSE	Stable	2.75241	0.000144193	3.08749	0.000425534	-0.0422512	0.999993
69879	chr1	4857050	4857499	TRUE	Stable	2.23355	0.00177806	2.79244	0.00108082	-0.0323574	0.999993
69880	chr1	4858300	4858999	FALSE	Stable	3.31788	9.74395e-06	2.45653	0.00345943	-0.0929044	0.999993
69881	chr1	5018350	5020649	FALSE	Stable	3.52794	3.95229e-06	3.32194	0.000224588	-0.0732044	0.999993
69882	chr1	5082850	5083599	FALSE	Stable	3.0092	4.07869e-05	2.52845	0.00268398	0.219608	0.999993
69883	chr1	5083650	5084049	FALSE	Stable	2.70854	0.00017929	2.37327	0.00461129	-0.484366	0.999993
69884	chr1	5588450	5588999	FALSE	Stable	3.03882	3.54511e-05	2.20767	0.00810746	0.138734	0.999993
69885	chr1	5916750	5917449	FALSE	Stable	2.55102	0.000390907	2.46047	0.00340956	0.022251	0.999993
69886	chr1	6213900	6214599	FALSE	Stable	2.60801	0.000294991	3.6585	0.000107593	0.0575679	0.999993
69887	chr1	6214950	6215949	FALSE	Stable	2.62098	0.000276327	2.90596	0.000745025	-0.0489868	0.999993
69888	chr1	6282350	6282599	FALSE	Stable	1.43507	0.0434151	2.63379	0.00185607	0.213187	0.999993
69889	chr1	6358900	6359649	FALSE	Stable	3.11163	2.50681e-05	2.10309	0.0114765	0.278635	0.999993
69890	chr1	6382550	6383249	FALSE	Stable	3.11727	2.43954e-05	2.66869	0.00164859	0.0403169	0.999993
69891	chr1	6383350	6383499	FALSE	Stable	2.70701	0.000180488	3.19561	0.000311237	-0.488596	0.999993
69892	chr1	6441050	6441699	FALSE	Stable	3.77489	1.4321e-06	2.41506	0.00398792	0.0329705	0.999993
69893	chr1	6715350	6715449	FALSE	other	0.335477	0.638105	2.20306	0.0082321	-0.98587	0.999993
69894	chr1	7087900	7088699	FALSE	Stable	3.60714	2.8456e-06	3.16065	0.000342686	0.0551864	0.999993
69895	chr1	7089300	7090049	FALSE	Stable	2.94509	5.59544e-05	2.60424	0.00205875	-0.0945566	0.999993
69896	chr1	7090500	7090699	FALSE	other	0.846168	0.233486	4.04851	4.46493e-05	-0.604125	0.999993
69897	chr1	7206250	7206799	FALSE	Stable	3.11727	2.43954e-05	2.38051	0.00450032	0.43356	0.999993
69898	chr1	7320550	7320699	FALSE	other	-0.033863	0.962032	3.14124	0.000363186	-1.75011	0.681261
69899	chr1	7398150	7398949	FALSE	Stable	3.43899	5.74504e-06	2.87047	0.000833529	0.161367	0.999993
69900	chr1	9298850	9300349	FALSE	Stable	2.85119	8.88136e-05	3.12981	0.000374658	0.140007	0.999993
69901	chr1	9544550	9545149	FALSE	Stable	2.72374	0.000165909	2.29959	0.00594409	0.253185	0.999993
69902	chr1	9545550	9546899	FALSE	Stable	2.26153	0.00156237	3.15553	0.000347611	-0.143582	0.999993
69903	chr1	9546950	9547549	FALSE	Stable	3.21336	1.54284e-05	1.73016	0.0365312	0.325845	0.999993
69904	chr1	9547600	9548299	FALSE	Stable	2.7327	0.000159195	2.01811	0.0150958	0.544944	0.999993
69905	chr1	9699350	9700249	TRUE	Stable	3.12461	2.35512e-05	3.07611	0.000440226	-0.128468	0.999993
69906	chr1	9700750	9701449	TRUE	Stable	2.74431	0.000150071	3.10172	0.000408598	0.155692	0.999993
69907	chr1	9744900	9745049	FALSE	other	1.19356	0.092753	2.49052	0.00306858	-0.139397	0.999993
69908	chr1	9745750	9745999	FALSE	other	2.64609	0.000244222	1.55813	0.0591626	0.951692	0.999993
69909	chr1	9746950	9748249	FALSE	Stable	3.0905	2.76236e-05	2.69169	0.00152241	-0.173386	0.999993
69910	chr1	9797450	9799149	FALSE	Stable	3.47006	5.03679e-06	3.20117	0.000307243	0.089467	0.999993
69911	chr1	9848300	9848899	FALSE	Stable	3.13643	2.2265e-05	2.76746	0.00117619	0.336085	0.999993
69912	chr1	9908650	9908849	FALSE	other	2.01112	0.00478816	1.53167	0.0635046	0.542803	0.999993
69913	chr1	9942250	9942499	FALSE	other	2.55654	0.000380379	1.18127	0.151497	1.00153	0.999993
69914	chr1	9942550	9943899	FALSE	Stable	2.87055	8.08005e-05	3.20434	0.00030482	0.00569252	0.999993
69915	chr1	9944350	9944549	FALSE	Stable	2.22901	0.00181409	2.31339	0.00567165	-0.230529	0.999993
69916	chr1	9967300	9967649	FALSE	Stable	3.61949	2.72055e-06	2.33339	0.00529017	0.17622	0.999993
69917	chr1	9967700	9968149	FALSE	Stable	2.45625	0.000620707	2.32425	0.00546105	-0.171195	0.999993
69918	chr1	9968250	9968599	FALSE	Stable	2.52115	0.000452876	2.19852	0.00835365	-0.0076321	0.999993
69919	chr1	10008900	10009449	FALSE	Stable	2.46376	0.000598617	3.02904	0.000506905	-0.113879	0.999993
69920	chr1	10036800	10037949	FALSE	Stable	3.18905	1.72949e-05	2.24834	0.0070644	0.298884	0.999993
69921	chr1	10038500	10039549	FALSE	Stable	3.06773	3.08459e-05	3.26522	0.00025873	0.0207104	0.999993
69922	chr1	10039850	10040599	FALSE	Stable	2.91365	6.52181e-05	2.91685	0.000718307	0.0295625	0.999993
69923	chr1	10231500	10233799	FALSE	Stable	3.56111	3.45129e-06	2.82759	0.000962491	0.413458	0.999993
69924	chr1	10348400	10348799	FALSE	other	3.36299	8.0645e-06	0.245374	0.766574	0.731576	0.999993
69925	chr1	10993150	10994999	TRUE	Stable	3.14712	2.11856e-05	3.246	0.000271525	0.165871	0.999993
69926	chr1	11037500	11037649	FALSE	other	2.93879	5.76432e-05	-0.521861	0.52603	1.91562	0.444009
69927	chr1	11329400	11329549	FALSE	Stable	1.87775	0.00837311	2.23006	0.00751443	0.0747616	0.999993
69928	chr1	11329800	11329899	FALSE	other	0.783825	0.269854	1.83283	0.0269013	0.00419059	0.999993
69929	chr1	11413600	11414949	FALSE	Stable	3.29638	1.06214e-05	3.08897	0.000423705	0.111294	0.999993
69930	chr1	11705850	11705999	FALSE	other	-0.303707	0.670265	3.08662	0.000426376	-0.792108	0.999993
69931	chr1	12577150	12577349	FALSE	Stable	1.81481	0.0107966	2.73007	0.00133503	-0.332578	0.999993
69932	chr1	12577500	12577599	FALSE	other	0.608744	0.391996	2.27735	0.00640724	-0.820035	0.999993
69933	chr1	12644700	12644949	FALSE	other	2.34925	0.00103472	1.43176	0.0825775	0.352202	0.999993
69934	chr1	12691550	12693649	FALSE	Stable	3.27453	1.16529e-05	3.66581	0.000105881	-0.183194	0.999993
69935	chr1	12718200	12718599	FALSE	Stable	3.62369	2.67524e-06	2.57513	0.00227765	-0.0800738	0.999993
69936	chr1	12835600	12836799	FALSE	Stable	2.87274	7.99013e-05	3.36843	0.000200156	0.324761	0.999993
69937	chr1	12875300	12875499	FALSE	other	1.3178	0.0635054	3.61666	0.000114615	-0.171138	0.999993
69938	chr1	12990650	12992899	FALSE	Stable	3.54536	3.68564e-06	3.72388	9.31354e-05	0.0380459	0.999993
69939	chr1	13126100	13126199	FALSE	other	3.14911	2.09866e-05	1.48068	0.072716	0.123403	0.999993
69940	chr1	13371650	13372449	TRUE	Stable	2.45564	0.000622395	3.21545	0.000295265	0.00646774	0.999993
69941	chr1	13372850	13374949	TRUE	Stable	3.67084	2.22977e-06	2.84188	0.000919055	0.426944	0.999993
69942	chr1	13426400	13426949	FALSE	Stable	2.61683	0.000282024	4.20882	2.83884e-05	0.223085	0.999993
69943	chr1	13494650	13494999	FALSE	Stable	1.4649	0.0392352	2.30926	0.00575249	-0.126282	0.999993
69944	chr1	13588500	13588749	FALSE	Stable	2.4051	0.000793795	2.27021	0.00656105	0.198243	0.999993
69945	chr1	13588800	13589349	FALSE	Stable	3.23137	1.4236e-05	2.18551	0.00871984	-0.111492	0.999993
69946	chr1	13589400	13589849	TRUE	Stable	3.43243	5.92438e-06	2.12634	0.0106197	0.317383	0.999993
69947	chr1	13590100	13590199	TRUE	Stable	3.9651	6.78363e-07	1.91565	0.0208739	0.504423	0.999993
69948	chr1	13659800	13661049	FALSE	Stable	3.21738	1.51648e-05	2.6037	0.00206285	-0.0339929	0.999993
69949	chr1	14304550	14304749	FALSE	Stable	1.68514	0.017829	3.25712	0.00026399	0.246741	0.999993
69950	chr1	14305050	14305199	FALSE	other	1.16582	0.100584	3.29247	0.000241583	0.00106989	0.999993
69951	chr1	14305850	14306099	FALSE	Stable	3.3109	1.00027e-05	2.55352	0.00245646	-0.212766	0.999993
69952	chr1	14306300	14306499	FALSE	Stable	1.88744	0.0080469	1.83283	0.0269013	-0.065417	0.999993
69953	chr1	14306650	14307249	FALSE	Stable	3.21746	1.5163e-05	3.495	0.000149125	-0.00384466	0.999993
69954	chr1	14307750	14307849	FALSE	other	2.21789	0.00191091	0.743107	0.366316	0.401507	0.999993
69955	chr1	14309300	14310799	FALSE	Stable	3.36865	7.86364e-06	2.95749	0.000631587	0.0851131	0.999993
69956	chr1	14356450	14356749	FALSE	Stable	2.5902	0.000322503	2.05825	0.0132723	0.00194341	0.999993
69957	chr1	14503650	14504049	FALSE	Stable	2.9868	4.56956e-05	2.09289	0.011859	-0.234728	0.999993
69958	chr1	14504100	14504749	FALSE	Stable	2.60639	0.000297347	3.18667	0.000319596	-0.170421	0.999993
69959	chr1	14505050	14505449	FALSE	Stable	2.96293	5.12895e-05	2.66627	0.001662	-0.110487	0.999993
69960	chr1	14505900	14506549	FALSE	Stable	2.42416	0.000724637	3.18479	0.000321298	-0.297716	0.999993
69961	chr1	14506850	14507249	FALSE	Stable	2.90335	6.86491e-05	3.0961	0.000414845	0.224807	0.999993
69962	chr1	14672450	14672599	FALSE	other	2.35329	0.00101451	0.603132	0.463477	0.358003	0.999993
69963	chr1	14755050	14756149	FALSE	Stable	4.241	2.27335e-07	3.17706	0.000328119	0.0600276	0.999993
69964	chr1	14918450	14919099	FALSE	Stable	2.64807	0.00024185	2.32947	0.00536253	-0.0581765	0.999993
69965	chr1	15286200	15287649	FALSE	Stable	3.59549	2.98014e-06	3.51766	0.00014245	0.0443233	0.999993
69966	chr1	15805200	15805449	FALSE	Stable	3.35209	8.47686e-06	1.86095	0.0247204	0.381267	0.999993
69967	chr1	15806150	15806949	FALSE	Stable	2.95743	5.2586e-05	2.66011	0.00169518	-0.0668603	0.999993
69968	chr1	15892300	15893249	FALSE	Stable	3.43076	5.96663e-06	3.08015	0.000434575	0.00277834	0.999993
69969	chr1	16058950	16059149	FALSE	other	0.0932924	0.896561	2.73703	0.001303	-1.79517	0.617199
69970	chr1	16092800	16093499	FALSE	Stable	3.3703	7.80099e-06	3.03549	0.00049671	0.157845	0.999993
69971	chr1	16102800	16102999	FALSE	other	0.933534	0.188766	2.63379	0.00185607	0.115758	0.999993
69972	chr1	16103100	16103999	FALSE	Stable	2.66077	0.000227112	3.62868	0.000112397	-0.0845193	0.999993
69973	chr1	16104550	16105199	TRUE	Stable	3.45031	5.47697e-06	2.06142	0.0131416	0.342264	0.999993
69974	chr1	16105300	16107199	TRUE	Stable	3.67598	2.17406e-06	3.47079	0.000158368	0.245462	0.999993
69975	chr1	16249600	16249949	FALSE	Stable	2.87059	8.07887e-05	1.87449	0.0237048	0.189618	0.999993
69976	chr1	16250250	16250399	FALSE	Stable	2.59336	0.000317697	1.85164	0.0254268	-0.650437	0.999993
69977	chr1	16293650	16293949	FALSE	other	2.72557	0.000164487	-0.874419	0.287792	1.27355	0.999993
69978	chr1	16518550	16518849	FALSE	Stable	1.56269	0.0279285	2.64793	0.00176667	-0.0878151	0.999993
69979	chr1	16519550	16520299	FALSE	Stable	3.24226	1.35358e-05	2.75603	0.00122175	0.518991	0.999993
69980	chr1	16617900	16619099	TRUE	Stable	3.47945	4.84736e-06	3.25283	0.000267092	0.217118	0.999993
69981	chr1	16619500	16620049	TRUE	Stable	2.3343	0.00111128	2.92726	0.000694242	-0.281372	0.999993
69982	chr1	16655650	16656799	FALSE	Stable	2.99273	4.43298e-05	3.54276	0.000134794	-0.385792	0.999993
69983	chr1	16657450	16657849	FALSE	Stable	2.45865	0.000613607	1.86449	0.0244642	-0.0557677	0.999993
69984	chr1	16665300	16666249	FALSE	Stable	3.76684	1.47656e-06	2.70712	0.00144712	0.0179352	0.999993
69985	chr1	16688050	16688799	FALSE	Stable	3.29917	1.04835e-05	3.61839	0.000114544	0.285088	0.999993
69986	chr1	16857350	16857499	FALSE	other	-0.422722	0.552418	2.39188	0.00432049	-0.995878	0.999993
69987	chr1	17096550	17098199	FALSE	Stable	3.94452	7.35068e-07	3.09742	0.00041346	0.26243	0.999993
69988	chr1	17145250	17145749	FALSE	Stable	2.35456	0.0010102	2.58036	0.00223592	-0.0511603	0.999993
69989	chr1	17726900	17728249	FALSE	Stable	3.39374	6.99964e-06	3.00841	0.000540076	0.0374975	0.999993
69990	chr1	18057250	18059049	FALSE	Stable	3.33446	9.12115e-06	3.29883	0.000237983	-0.0517051	0.999993
69991	chr1	19202750	19202899	FALSE	Stable	1.66094	0.0195064	1.9581	0.0182934	-0.960466	0.999993
69992	chr1	19205850	19206099	FALSE	Stable	3.31624	9.8067e-06	2.93084	0.000686169	-0.277904	0.999993
69993	chr1	19209750	19209999	FALSE	Stable	2.35791	0.000994574	1.75072	0.0343807	0.715389	0.999993
69994	chr1	19210100	19210249	FALSE	Stable	1.53515	0.0307826	2.84854	0.000898189	-0.0722566	0.999993
69995	chr1	19231900	19232049	FALSE	other	3.31243	9.94652e-06	0.853591	0.299372	0.50385	0.999993
69996	chr1	19241100	19241299	FALSE	Stable	3.46794	5.08685e-06	2.61061	0.00201175	-0.112825	0.999993
69997	chr1	19241400	19241599	FALSE	other	2.41506	0.00075676	1.50444	0.068316	0.380613	0.999993
69998	chr1	20477650	20478449	FALSE	Stable	2.41221	0.000767429	2.70255	0.00146862	-0.104075	0.999993
69999	chr1	20503400	20503549	FALSE	other	1.72571	0.0152864	0.293707	0.721962	0.976858	0.999993
70000	chr1	20818850	20820149	FALSE	Stable	2.76142	0.000138107	3.76254	8.61289e-05	0.0801403	0.999993
70001	chr1	20890050	20891599	FALSE	Stable	3.43906	5.74297e-06	3.8536	7.14204e-05	0.00937437	0.999993
70002	chr1	20951100	20951399	FALSE	Stable	1.96715	0.00577767	2.65628	0.00171842	-0.364785	0.999993
70003	chr1	20951650	20952349	FALSE	Stable	3.36561	7.98016e-06	3.60334	0.00011751	-0.0315851	0.999993
70004	chr1	21078350	21079149	FALSE	Stable	3.23167	1.42206e-05	2.88769	0.000788965	0.168643	0.999993
70005	chr1	21079450	21079699	FALSE	Stable	2.41192	0.000768526	2.04452	0.0138853	0.397762	0.999993
70006	chr1	21080000	21080149	FALSE	Stable	2.67576	0.000210854	2.66507	0.00166782	-0.0777545	0.999993
70007	chr1	21166400	21166649	FALSE	Stable	2.37084	0.000935604	2.65754	0.00171061	-0.223354	0.999993
70008	chr1	21166800	21167099	FALSE	Stable	3.61625	2.76415e-06	2.2056	0.00816435	0.300773	0.999993
70009	chr1	21218650	21219199	FALSE	Stable	2.58325	0.000333291	2.2475	0.00708319	0.16479	0.999993
70010	chr1	21960300	21962499	FALSE	Stable	3.77481	1.4321e-06	3.58242	0.000122919	0.0443096	0.999993
70011	chr1	21962600	21962749	FALSE	Stable	2.5786	0.000340602	2.53067	0.00266295	0.929642	0.999993
70012	chr1	22268700	22269049	FALSE	other	0.808121	0.255118	2.56789	0.00233553	-1.11654	0.999993
70013	chr1	22533100	22534449	FALSE	Stable	3.76865	1.47142e-06	3.24101	0.000275611	0.077035	0.999993
70014	chr1	22805450	22806599	FALSE	Stable	3.89324	9.03983e-07	3.54864	0.000132683	0.168658	0.999993
70015	chr1	23094300	23094449	FALSE	other	0.205429	0.773972	2.20101	0.00828433	-2.08402	0.253775
70016	chr1	23255800	23255949	FALSE	other	1.06766	0.132727	1.98208	0.0169384	-0.2712	0.999993
70017	chr1	23256300	23256449	FALSE	Stable	1.5496	0.0292584	1.91227	0.0210992	-0.0383224	0.999993
70018	chr1	23256550	23257699	FALSE	Stable	3.58202	3.1529e-06	3.19315	0.000313416	0.0454597	0.999993
70019	chr1	23382300	23383249	FALSE	Stable	2.90253	6.88386e-05	3.77689	8.32094e-05	-0.00930471	0.999993
70020	chr1	23383400	23383849	FALSE	Stable	2.18101	0.00226145	3.32924	0.000221295	0.0929089	0.999993
70021	chr1	23761700	23763249	FALSE	Stable	3.63786	2.5398e-06	3.63746	0.000110909	0.146803	0.999993
70022	chr1	23921550	23922799	FALSE	Stable	2.97785	4.77181e-05	3.26604	0.000258194	0.088506	0.999993
70023	chr1	23959200	23959699	FALSE	Stable	1.93914	0.00649931	2.40737	0.00409009	-0.0168333	0.999993
70024	chr1	24004950	24005399	FALSE	Stable	2.61857	0.000279625	4.17539	3.1317e-05	-0.037923	0.999993
70025	chr1	24005650	24005999	FALSE	Stable	1.93049	0.00674148	3.03514	0.000497447	-0.273473	0.999993
70026	chr1	24099150	24100249	FALSE	Stable	3.1668	1.92545e-05	2.65748	0.00171097	0.329401	0.999993
70027	chr1	24100700	24101049	FALSE	Stable	2.37728	0.000906672	2.50017	0.00296839	-0.0925282	0.999993
70028	chr1	24194850	24196149	TRUE	Stable	2.83819	9.4569e-05	3.11521	0.000392419	-0.0780714	0.999993
70029	chr1	24196350	24196649	TRUE	Stable	1.55513	0.0286904	2.74933	0.00124929	0.62088	0.999993
70030	chr1	24196850	24197099	FALSE	Stable	2.07024	0.0037021	2.64793	0.00176667	-0.404969	0.999993
70031	chr1	24586300	24587449	FALSE	Stable	3.6896	2.04673e-06	3.27498	0.000251946	-0.0445194	0.999993
70032	chr1	24678000	24678449	FALSE	Stable	2.60276	0.000302772	2.54483	0.00253372	0.178091	0.999993
70033	chr1	24678900	24679149	FALSE	Stable	1.96633	0.00579661	3.27125	0.000254708	-0.722226	0.999993
70034	chr1	24679500	24679849	FALSE	Stable	3.03579	3.59996e-05	2.11079	0.0111832	0.778846	0.999993
70035	chr1	24924300	24924449	FALSE	Stable	2.14335	0.00267659	1.69653	0.0402711	0.358378	0.999993
70036	chr1	25228300	25228599	FALSE	Stable	1.56096	0.0280985	2.35469	0.00492252	-0.150502	0.999993
70037	chr1	25828950	25829149	FALSE	Stable	1.98135	0.00544043	2.86805	0.000839946	-0.43186	0.999993
70038	chr1	25829350	25830399	TRUE	Stable	3.93645	7.57432e-07	3.19955	0.000308544	-0.0572713	0.999993
70039	chr1	25830450	25830949	TRUE	Stable	2.4773	0.000561067	2.64844	0.00176393	0.0349988	0.999993
70040	chr1	27489400	27489549	FALSE	other	1.69999	0.0168562	0.658035	0.423851	-0.503076	0.999993
70041	chr1	27559600	27559699	FALSE	Stable	1.396	0.0493957	2.50497	0.00291754	-1.10896	0.999993
70042	chr1	30533000	30533099	FALSE	other	-0.731715	0.303149	1.83843	0.0264578	-1.41258	0.999993
70043	chr1	30872250	30873749	TRUE	Stable	3.40762	6.60695e-06	2.84813	0.000899645	0.181782	0.999993
70044	chr1	30874050	30874349	TRUE	Stable	1.79227	0.0118114	2.67995	0.0015863	-0.244449	0.999993
70045	chr1	30947300	30947499	FALSE	Stable	2.62396	0.000272347	1.84662	0.0258117	0.657296	0.999993
70046	chr1	30947650	30947949	FALSE	Stable	3.37029	7.80099e-06	2.3356	0.00525233	-0.0939372	0.999993
70047	chr1	30948050	30948649	FALSE	Stable	3.23689	1.38886e-05	2.18619	0.00869917	0.0280633	0.999993
70048	chr1	30949950	30950649	FALSE	Stable	2.71175	0.000176241	2.54736	0.00251058	0.0769621	0.999993
70049	chr1	30950700	30950899	FALSE	Stable	2.42102	0.000735491	2.7612	0.00119954	-0.0664804	0.999993
70050	chr1	31755000	31755149	FALSE	other	3.02506	3.78729e-05	0.820969	0.318277	1.23394	0.999993
70051	chr1	32172250	32173449	FALSE	Stable	3.16761	1.91896e-05	3.21532	0.000295349	0.205306	0.999993
70052	chr1	33669000	33670849	FALSE	Stable	3.05742	3.24041e-05	3.32879	0.000221295	0.0558699	0.999993
70053	chr1	33719750	33721149	TRUE	Stable	2.62174	0.000275242	2.89603	0.000769355	0.128386	0.999993
70054	chr1	33756500	33758249	FALSE	Stable	3.2014	1.63468e-05	3.45284	0.000163554	-0.0657944	0.999993
70055	chr1	33813150	33814299	FALSE	Stable	2.60904	0.000293438	3.2081	0.000301818	-0.128593	0.999993
70056	chr1	33814700	33814949	FALSE	other	1.28472	0.0704471	2.33644	0.00523769	-0.129918	0.999993
70057	chr1	33883650	33883799	FALSE	other	1.83377	0.0100074	1.57462	0.0565591	0.841842	0.999993
70058	chr1	33907000	33908849	FALSE	Stable	3.46617	5.11706e-06	3.22496	0.000287179	0.092246	0.999993
70059	chr1	34005350	34006749	FALSE	Stable	3.20503	1.60807e-05	3.61636	0.000114697	-0.0519827	0.999993
70060	chr1	34010750	34012399	FALSE	Stable	3.05698	3.24806e-05	3.29668	0.00023948	-0.0339541	0.999993
70061	chr1	34103550	34103699	FALSE	Stable	2.46628	0.000591615	2.53297	0.00264083	-0.155126	0.999993
70062	chr1	34236200	34236399	FALSE	Stable	2.38731	0.000864308	2.93929	0.000667922	0.0912433	0.999993
70063	chr1	34236450	34237099	FALSE	Stable	3.17963	1.81377e-05	3.03354	0.000500139	-0.218087	0.999993
70064	chr1	34432850	34433599	FALSE	Stable	3.30141	1.03813e-05	2.24051	0.00725066	0.184473	0.999993
70065	chr1	34434050	34434899	FALSE	Stable	2.97305	4.88151e-05	3.16564	0.000338259	0.217273	0.999993
70066	chr1	34434950	34435299	FALSE	Stable	3.16408	1.94901e-05	3.22351	0.000288317	-0.212233	0.999993
70067	chr1	34435350	34435749	FALSE	Stable	1.82552	0.0103529	2.54095	0.00256693	-0.252513	0.999993
70068	chr1	34438750	34439299	FALSE	Stable	3.13934	2.19728e-05	1.77019	0.0324487	0.215943	0.999993
70069	chr1	34440150	34440949	FALSE	Stable	2.67963	0.000206982	2.99652	0.000560186	0.0276776	0.999993
70070	chr1	34459200	34460599	FALSE	Stable	3.17905	1.81794e-05	3.423	0.000175271	0.107849	0.999993
70071	chr1	34472400	34473499	FALSE	Stable	3.29134	1.08482e-05	3.73494	9.07504e-05	0.319009	0.999993
70072	chr1	34485550	34485699	FALSE	other	-0.0648687	0.927824	1.54403	0.0614483	-0.646179	0.999993
70073	chr1	34536650	34536749	FALSE	other	2.13284	0.00280727	0.542453	0.509857	1.06039	0.999993
70074	chr1	34579200	34580199	FALSE	Stable	2.82161	0.000102694	2.40503	0.00412496	-0.154509	0.999993
70075	chr1	34677850	34679049	FALSE	Stable	3.38356	7.31502e-06	3.46192	0.000161631	0.0374263	0.999993
70076	chr1	34750150	34751199	FALSE	Stable	3.73628	1.68166e-06	3.1732	0.000332096	0.201574	0.999993
70077	chr1	34801600	34802499	FALSE	Stable	3.48621	4.70573e-06	3.22434	0.000287639	0.163761	0.999993
70078	chr1	34841200	34842349	FALSE	Stable	3.31728	9.76597e-06	3.46006	0.000161769	-0.148611	0.999993
70079	chr1	34842450	34842599	TRUE	other	1.38155	0.0518119	2.84565	0.000907046	1.13412	0.999993
70080	chr1	34842950	34843649	TRUE	Stable	2.64519	0.000245338	3.31227	0.000229767	-0.140549	0.999993
70081	chr1	34849900	34850599	FALSE	Stable	3.63467	2.56531e-06	3.49789	0.000147929	0.200126	0.999993
70082	chr1	34850650	34850849	FALSE	other	2.79581	0.000116446	1.0493	0.202221	0.35435	0.999993
70083	chr1	36064750	36065149	FALSE	Stable	3.11942	2.41644e-05	1.95451	0.0185003	-0.0978675	0.999993
70084	chr1	36065350	36065649	FALSE	Stable	2.47291	0.000573047	1.96089	0.0181299	0.343909	0.999993
70085	chr1	36067850	36068299	FALSE	Stable	3.59727	2.96149e-06	2.23874	0.00728838	-0.265181	0.999993
70086	chr1	36068450	36069949	FALSE	Stable	3.50898	4.25419e-06	3.61727	0.000114615	0.0670823	0.999993
70087	chr1	36242900	36244299	FALSE	Stable	2.85465	8.73497e-05	2.88701	0.00079072	0.0238034	0.999993
70088	chr1	36244600	36244799	FALSE	Stable	1.83627	0.00990793	1.65182	0.045705	-0.270699	0.999993
70089	chr1	36254950	36255099	FALSE	other	2.08215	0.00351419	1.3016	0.114138	0.262337	0.999993
70090	chr1	36303200	36303599	FALSE	Stable	3.10136	2.62765e-05	2.90417	0.000748336	0.369913	0.999993
70091	chr1	36307750	36308799	FALSE	Stable	4.07498	4.51798e-07	3.85359	7.14204e-05	0.046056	0.999993
70092	chr1	36367950	36368799	TRUE	Stable	3.19417	1.68879e-05	2.95952	0.000627267	0.24008	0.999993
70093	chr1	36368850	36368999	TRUE	Stable	1.90968	0.0073393	2.38793	0.00438088	0.104441	0.999993
70094	chr1	36444250	36445199	FALSE	Stable	3.60673	2.84944e-06	2.92605	0.000697234	-0.076913	0.999993
70095	chr1	36470900	36471449	FALSE	Stable	2.85309	8.79712e-05	3.23212	0.000282458	0.12283	0.999993
70096	chr1	36471850	36472549	FALSE	Stable	2.51698	0.000462368	2.56725	0.00233959	0.222521	0.999993
70097	chr1	36511600	36511749	TRUE	other	0.500055	0.482431	2.23925	0.00727802	-0.18273	0.999993
70098	chr1	36512150	36512249	TRUE	Stable	1.73288	0.0148903	1.9209	0.0205402	-0.595167	0.999993
70099	chr1	36512400	36513699	TRUE	Stable	2.94201	5.67626e-05	2.9164	0.000719431	0.0173544	0.999993
70100	chr1	36546300	36547199	FALSE	Stable	2.84309	9.24583e-05	2.55501	0.00244484	0.360615	0.999993
70101	chr1	36555500	36557149	TRUE	Stable	3.04423	3.4509e-05	3.04724	0.000478921	0.0549541	0.999993
70102	chr1	36557250	36557449	TRUE	Stable	2.30394	0.00128135	1.95771	0.0183163	-0.00291005	0.999993
70103	chr1	36558000	36558199	TRUE	Stable	2.35185	0.00102177	1.70498	0.03931	-0.481766	0.999993
70104	chr1	36558450	36559299	TRUE	Stable	3.23173	1.42165e-05	3.32596	0.000222875	0.0329758	0.999993
70105	chr1	36580250	36580699	FALSE	Stable	1.79943	0.0114772	2.63972	0.00181791	0.201245	0.999993
70106	chr1	36588850	36589049	TRUE	other	3.02806	3.73306e-05	0.871582	0.289329	0.825665	0.999993
70107	chr1	36691150	36691249	TRUE	Stable	2.04705	0.00409894	2.60066	0.00208463	0.294964	0.999993
70108	chr1	36691700	36692499	TRUE	Stable	3.34657	8.6738e-06	3.30648	0.000233185	0.256703	0.999993
70109	chr1	36708900	36709899	TRUE	Stable	2.83383	9.65758e-05	3.12577	0.000379415	0.159101	0.999993
70110	chr1	36723550	36723799	TRUE	Stable	1.88728	0.00805236	2.71111	0.00142586	0.417306	0.999993
70111	chr1	36771050	36771199	FALSE	Stable	1.60707	0.0237995	1.82793	0.0272931	0.865372	0.999993
70112	chr1	36784750	36784999	FALSE	other	2.64214	0.000249231	1.12284	0.172566	-0.104409	0.999993
70113	chr1	36785100	36785799	FALSE	Stable	3.15238	2.06783e-05	3.04945	0.000476166	0.0291096	0.999993
70114	chr1	36938050	36939549	TRUE	Stable	3.26634	1.21177e-05	3.12443	0.000381036	-0.0880634	0.999993
70115	chr1	36939900	36940499	FALSE	Stable	2.67831	0.000208264	2.62794	0.00189458	-0.0306888	0.999993
70116	chr1	37028700	37029799	FALSE	Stable	3.5965	2.96834e-06	3.06169	0.000458676	0.147804	0.999993
70117	chr1	37299500	37299649	FALSE	other	0.852943	0.229752	1.80032	0.0296607	-0.520305	0.999993
70118	chr1	37299950	37300949	FALSE	Stable	3.26363	1.22588e-05	3.0756	0.000440869	0.13513	0.999993
70119	chr1	37429300	37429899	TRUE	Stable	3.26126	1.23952e-05	2.87473	0.00082139	0.115209	0.999993
70120	chr1	37430300	37431249	TRUE	Stable	3.36835	7.87559e-06	3.09336	0.000418192	-0.238249	0.999993
70121	chr1	37540100	37541099	FALSE	Stable	3.2607	1.24277e-05	2.82626	0.000966969	0.258506	0.999993
70122	chr1	37541150	37541549	FALSE	Stable	2.57464	0.000347465	2.56334	0.00237197	0.0804922	0.999993
70123	chr1	37719350	37720249	FALSE	Stable	3.05501	3.27849e-05	3.09574	0.00041538	0.165016	0.999993
70124	chr1	37847250	37847349	FALSE	HH_dep	2.21651	0.00192313	-2.6009	0.00208265	2.5827	0.0394629
70125	chr1	37864100	37864849	TRUE	Stable	2.74283	0.00015127	2.73279	0.00132226	0.15473	0.999993
70126	chr1	37865350	37866199	TRUE	Stable	2.76143	0.000138105	2.91885	0.000713214	0.000749631	0.999993
70127	chr1	37871650	37872099	FALSE	Stable	2.21303	0.00195422	3.26121	0.000261709	0.151832	0.999993
70128	chr1	37872250	37873049	FALSE	Stable	2.85183	8.85304e-05	3.36774	0.000200535	0.237354	0.999993
70129	chr1	37889350	37890449	FALSE	Stable	3.32956	9.32291e-06	2.22272	0.00770319	-0.0261958	0.999993
70130	chr1	37890650	37891549	FALSE	Stable	3.17178	1.88258e-05	3.31938	0.000225951	-0.221411	0.999993
70131	chr1	37996200	37996899	TRUE	Stable	3.9232	8.00555e-07	3.23636	0.000279365	0.278586	0.999993
70132	chr1	37997450	37997949	TRUE	Stable	2.9758	4.82139e-05	2.7435	0.00127499	0.25049	0.999993
70133	chr1	37998300	37999749	FALSE	Stable	3.46293	5.19986e-06	2.33103	0.00533302	0.205199	0.999993
70134	chr1	38128450	38129549	TRUE	Stable	3.38929	7.12203e-06	2.62212	0.0019331	-0.0372864	0.999993
70135	chr1	38130250	38130449	TRUE	other	2.06541	0.00378232	0.932175	0.257032	0.784099	0.999993
70136	chr1	38511250	38511449	FALSE	Stable	2.55478	0.000383736	3.63405	0.000111276	0.345715	0.999993
70137	chr1	38512750	38512999	TRUE	Stable	2.30866	0.0012528	1.87143	0.0239329	0.291079	0.999993
70138	chr1	38606600	38606699	TRUE	other	1.044	0.141558	1.92503	0.0202828	0.276534	0.999993
70139	chr1	38625150	38625449	FALSE	Stable	2.41661	0.000751052	2.92873	0.000690787	0.319054	0.999993
70140	chr1	38625550	38625699	FALSE	Stable	2.25704	0.00159613	1.84129	0.0262382	0.523947	0.999993
70141	chr1	38625800	38628649	FALSE	Stable	2.88122	7.65824e-05	2.96503	0.000616065	0.12781	0.999993
70142	chr1	38631650	38631799	TRUE	other	0.25779	0.718344	1.77814	0.0316957	-0.112953	0.999993
70143	chr1	38758500	38758649	TRUE	Stable	2.2204	0.00188958	1.9353	0.019641	0.196665	0.999993
70144	chr1	38766900	38767899	FALSE	Stable	2.88629	7.46834e-05	2.86186	0.000857864	0.297343	0.999993
70145	chr1	38835600	38836849	FALSE	Stable	3.95993	6.87002e-07	3.42634	0.000173666	-0.000736611	0.999993
70146	chr1	38897150	38898399	FALSE	Stable	3.01648	3.94095e-05	3.50378	0.000146384	0.163756	0.999993
70147	chr1	38987000	38987599	FALSE	Stable	3.03256	3.65729e-05	2.6967	0.00149775	0.291276	0.999993
70148	chr1	38987900	38988899	FALSE	Stable	2.60898	0.00029351	3.07677	0.000439207	-0.0109981	0.999993
70149	chr1	39030050	39030299	FALSE	Stable	2.50241	0.00049601	1.74957	0.0344917	0.187549	0.999993
70150	chr1	39192600	39194649	FALSE	Stable	3.40038	6.79866e-06	3.92837	6.10211e-05	-0.00642964	0.999993
70151	chr1	39229450	39229599	FALSE	other	2.43957	0.000673289	-0.817507	0.320324	2.18379	0.171921
70152	chr1	39362100	39362299	FALSE	other	2.9816	4.68734e-05	1.1669	0.156542	0.292332	0.999993
70153	chr1	39366850	39367699	FALSE	Stable	2.73718	0.000155803	3.32939	0.000221295	-0.0592288	0.999993
70154	chr1	39368350	39369499	FALSE	Stable	2.49842	0.000505818	3.67228	0.000103588	-0.109516	0.999993
70155	chr1	39477850	39479299	FALSE	Stable	3.51668	4.15614e-06	3.19242	0.000313852	0.318226	0.999993
70156	chr1	39534950	39535549	TRUE	Stable	3.08941	2.77595e-05	2.73096	0.00133064	-0.123131	0.999993
70157	chr1	39535950	39536899	TRUE	Stable	3.03263	3.65652e-05	3.18578	0.000320257	0.154143	0.999993
70158	chr1	39575800	39577349	TRUE	Stable	4.07686	4.51798e-07	2.73003	0.00133519	0.308182	0.999993
70159	chr1	39577550	39578099	TRUE	Stable	2.15473	0.00254411	3.30623	0.000233312	0.0303734	0.999993
70160	chr1	39650250	39651399	FALSE	Stable	3.20223	1.62859e-05	3.14188	0.000362491	-0.0787747	0.999993
70161	chr1	39720500	39721149	FALSE	Stable	2.74225	0.000151728	2.75784	0.00121359	-0.0714663	0.999993
70162	chr1	39868100	39868199	FALSE	Stable	2.25253	0.00162834	2.66444	0.00167087	1.01308	0.999993
70163	chr1	39899950	39900849	TRUE	Stable	3.83762	1.10951e-06	2.68702	0.00154802	-0.0828295	0.999993
70164	chr1	39901200	39901499	TRUE	Stable	2.57829	0.000341046	1.81042	0.028774	0.139787	0.999993
70165	chr1	39901550	39903249	FALSE	Stable	3.14079	2.18325e-05	3.33736	0.000217101	-3.61349e-05	0.999993
70166	chr1	39903350	39903549	FALSE	other	0.625122	0.379265	4.11616	3.72386e-05	-0.254451	0.999993
70167	chr1	39935450	39936499	FALSE	Stable	2.69873	0.000187983	4.11142	3.72386e-05	-0.00757037	0.999993
70168	chr1	40085400	40086349	FALSE	Stable	3.2609	1.24155e-05	3.66564	0.000105928	-0.141258	0.999993
70169	chr1	40266400	40267149	FALSE	Stable	2.52653	0.000441112	3.21145	0.00029913	0.0734155	0.999993
70170	chr1	40324700	40324849	FALSE	other	0.99905	0.159417	2.6445	0.00178805	-0.23354	0.999993
70171	chr1	40325100	40326199	FALSE	Stable	2.78993	0.000119801	3.10455	0.000404877	-0.309064	0.999993
70172	chr1	40436600	40436749	FALSE	other	1.88744	0.0080469	0.430313	0.601403	0.927128	0.999993
70173	chr1	40680600	40681549	FALSE	Stable	2.83748	9.48584e-05	3.14353	0.000360589	-0.163265	0.999993
70174	chr1	40681600	40682049	FALSE	Stable	2.6886	0.000197895	2.86177	0.000858051	0.00147126	0.999993
70175	chr1	40715850	40715949	FALSE	other	1.95841	0.0059921	-0.620859	0.450446	1.18711	0.999993
70176	chr1	40790200	40791149	FALSE	Stable	3.53633	3.81411e-06	2.26886	0.00659144	0.181964	0.999993
70177	chr1	41034850	41035049	FALSE	other	2.46201	0.000603383	-0.0012474	0.998792	0.940889	0.999993
70178	chr1	41035150	41035449	FALSE	Stable	1.7712	0.012821	3.23731	0.000278512	-0.412921	0.999993
70179	chr1	41037100	41037249	FALSE	other	2.25615	0.00160208	-0.00439845	0.995863	1.18727	0.999993
70180	chr1	41275200	41275699	FALSE	Stable	2.54906	0.000394694	2.57654	0.0022673	-0.0224013	0.999993
70181	chr1	41610550	41610849	FALSE	other	0.977776	0.168475	3.00803	0.000540806	-0.622858	0.999993
70182	chr1	41652700	41652849	FALSE	other	2.56381	0.000366985	1.56822	0.0575411	-0.0776951	0.999993
70183	chr1	41763750	41763899	FALSE	other	1.08714	0.125846	2.82014	0.000986216	-1.733	0.719606
70184	chr1	41810650	41810899	FALSE	Stable	2.45576	0.000622063	2.27886	0.00637559	-0.278252	0.999993
70185	chr1	42242850	42242999	FALSE	other	0.64014	0.367732	1.61642	0.0504571	-0.702588	0.999993
70186	chr1	42261550	42261949	FALSE	Stable	2.45946	0.000611144	2.55451	0.00244846	0.0131329	0.999993
70187	chr1	42472600	42472949	FALSE	other	1.17505	0.0979445	3.09638	0.000414587	-0.105324	0.999993
70188	chr1	42483200	42483349	FALSE	other	-1.84641	0.0095127	2.877	0.00081451	-2.34135	0.10093
70189	chr1	42491350	42492199	FALSE	Stable	2.63676	0.000255638	3.31683	0.000228026	0.284233	0.999993
70190	chr1	42539800	42539999	FALSE	other	2.36432	0.000964506	0.872764	0.288703	0.642673	0.999993
70191	chr1	42684150	42685149	FALSE	Stable	2.54904	0.000394722	2.9651	0.000616065	-0.0892008	0.999993
70192	chr1	42686150	42687349	FALSE	Stable	3.17171	1.88293e-05	3.28608	0.000245056	-0.0411309	0.999993
70193	chr1	42693450	42695449	TRUE	Stable	3.34376	8.76817e-06	3.34161	0.000214221	0.063876	0.999993
70194	chr1	42695650	42695799	FALSE	other	2.31822	0.0011983	1.57803	0.0560318	0.594033	0.999993
70195	chr1	42696600	42696999	FALSE	Stable	4.45981	8.14095e-08	3.10095	0.000409293	-0.163503	0.999993
70196	chr1	42697300	42697699	FALSE	Stable	2.73648	0.000156321	2.52615	0.00270587	-0.307885	0.999993
70197	chr1	42698550	42698749	FALSE	other	0.970107	0.171844	2.2162	0.00787501	-0.159854	0.999993
70198	chr1	42713250	42713349	FALSE	other	1.09573	0.122847	2.03918	0.0141172	-0.300229	0.999993
70199	chr1	42713400	42713999	FALSE	Stable	2.95141	5.41139e-05	2.13481	0.0103232	-0.0141335	0.999993
70200	chr1	42714150	42714249	FALSE	other	1.33754	0.0597044	2.88175	0.000803043	-0.132296	0.999993
70201	chr1	42714300	42714549	FALSE	Stable	3.04752	3.39435e-05	1.67944	0.042268	0.548444	0.999993
70202	chr1	42771850	42772049	FALSE	Stable	1.66212	0.0194288	3.18128	0.000324254	-0.361593	0.999993
70203	chr1	42850650	42851099	FALSE	Stable	1.79779	0.011553	3.84594	7.24987e-05	-0.147051	0.999993
70204	chr1	42851450	42852299	FALSE	Stable	2.79953	0.000114266	3.01254	0.000533493	0.131562	0.999993
70205	chr1	42952700	42954049	TRUE	Stable	3.07485	2.97841e-05	3.0444	0.000482784	0.0866177	0.999993
70206	chr1	43091850	43093149	FALSE	Stable	3.31251	9.94652e-06	3.49764	0.000148048	0.017663	0.999993
70207	chr1	43097650	43098499	TRUE	Stable	3.10931	2.53166e-05	2.83537	0.000939013	0.418627	0.999993
70208	chr1	43098650	43098799	TRUE	other	1.712	0.0161089	0.836923	0.308921	-0.647283	0.999993
70209	chr1	43099000	43099499	TRUE	Stable	2.809	0.00010904	2.78582	0.00110677	0.143349	0.999993
70210	chr1	43163150	43164199	FALSE	Stable	3.03328	3.64547e-05	3.27023	0.000255522	-0.0740342	0.999993
70211	chr1	43444700	43445849	TRUE	Stable	2.35946	0.000987035	3.32451	0.000223326	-0.105982	0.999993
70212	chr1	43446000	43446099	TRUE	other	1.44184	0.042424	1.42657	0.0836535	-0.130883	0.999993
70213	chr1	43446400	43447849	FALSE	Stable	3.53472	3.84453e-06	3.45307	0.000163554	-0.0961667	0.999993
70214	chr1	43447950	43448099	FALSE	Stable	2.58689	0.000327558	2.16117	0.00945169	-0.104278	0.999993
70215	chr1	43826550	43827549	FALSE	Stable	2.84219	9.28293e-05	3.39994	0.000185943	0.0218939	0.999993
70216	chr1	43828100	43828549	TRUE	Stable	2.27407	0.0014737	2.38336	0.00445464	-0.282349	0.999993
70217	chr1	43932950	43933799	FALSE	Stable	3.25563	1.27177e-05	3.23117	0.00028307	0.0572227	0.999993
70218	chr1	43934200	43935599	FALSE	Stable	3.18573	1.7599e-05	2.9775	0.000593156	0.101513	0.999993
70219	chr1	44042050	44042649	FALSE	Stable	2.78823	0.000120749	2.68258	0.0015713	-0.209668	0.999993
70220	chr1	44101050	44102049	TRUE	Stable	3.61062	2.82038e-06	3.24823	0.000270284	0.191425	0.999993
70221	chr1	44102100	44102299	TRUE	Stable	1.79374	0.0117434	2.77955	0.00113009	-0.307249	0.999993
70222	chr1	44102600	44103249	TRUE	Stable	2.61681	0.000282031	2.44035	0.00365331	0.209227	0.999993
70223	chr1	44117300	44117649	FALSE	Stable	2.02284	0.00455281	2.90378	0.00074919	-0.0497608	0.999993
70224	chr1	44117700	44118749	FALSE	Stable	3.2619	1.23578e-05	2.79847	0.00106079	-0.0908538	0.999993
70225	chr1	44119000	44120599	FALSE	Stable	2.71554	0.000172822	3.36782	0.000200529	0.00510788	0.999993
70226	chr1	44147100	44147749	TRUE	Stable	3.1205	2.40396e-05	2.08893	0.0120111	0.0837131	0.999993
70227	chr1	44147950	44148999	TRUE	Stable	3.39577	6.93691e-06	2.59046	0.00215943	0.0709817	0.999993
70228	chr1	44198700	44199249	FALSE	Stable	1.99622	0.00510286	2.87312	0.000825659	-0.0585135	0.999993
70229	chr1	44551250	44551649	FALSE	Stable	2.7711	0.000131572	3.18257	0.000323357	0.10083	0.999993
70230	chr1	44551900	44553249	TRUE	Stable	2.78338	0.000123702	3.08207	0.00043212	0.143689	0.999993
70231	chr1	44553500	44553799	FALSE	other	2.30792	0.00125734	1.19399	0.147177	0.548636	0.999993
70232	chr1	44553850	44554049	FALSE	Stable	2.90325	6.86647e-05	2.88392	0.000798098	-0.0691029	0.999993
70233	chr1	44678200	44678349	FALSE	other	0.131679	0.854203	2.55352	0.00245646	-1.00993	0.999993
70234	chr1	44678950	44679299	TRUE	other	3.08601	2.82102e-05	1.53135	0.0635441	0.705779	0.999993
70235	chr1	45312250	45312999	FALSE	Stable	2.67242	0.000214403	2.90371	0.000749281	-0.138932	0.999993
70236	chr1	45313100	45313349	FALSE	other	1.33214	0.060728	2.56549	0.00235376	-0.402177	0.999993
70237	chr1	45313650	45313899	FALSE	Stable	2.45069	0.000637569	2.28141	0.00632381	0.0164777	0.999993
70238	chr1	45385850	45386199	FALSE	Stable	2.39037	0.000851672	2.4396	0.0036633	0.123492	0.999993
70239	chr1	45501250	45503599	FALSE	Stable	3.14234	2.16699e-05	2.30501	0.0058361	0.0988206	0.999993
70240	chr1	45794850	45795349	FALSE	Stable	2.56602	0.000362912	2.83526	0.000939245	0.0199965	0.999993
70241	chr1	45795800	45796449	FALSE	Stable	2.88262	7.60499e-05	3.04829	0.000477573	-0.13291	0.999993
70242	chr1	45925050	45926449	FALSE	Stable	3.22798	1.44304e-05	3.36086	0.000204035	-0.0293142	0.999993
70243	chr1	46053200	46053349	FALSE	Stable	3.31175	9.97303e-06	2.98892	0.00057352	0.322832	0.999993
70244	chr1	46066400	46067499	TRUE	Stable	3.22273	1.47812e-05	2.81956	0.000988312	0.0500204	0.999993
70245	chr1	46425350	46425849	FALSE	Stable	2.60054	0.000306327	3.21338	0.000297082	0.308962	0.999993
70246	chr1	46851650	46851849	FALSE	Stable	2.68708	0.00019932	1.71745	0.0379236	0.120747	0.999993
70247	chr1	46852000	46853449	FALSE	Stable	2.89951	6.99293e-05	2.91032	0.000734464	0.0536109	0.999993
70248	chr1	46854000	46854249	TRUE	Stable	1.5661	0.0275935	2.68196	0.00157482	-0.698301	0.999993
70249	chr1	46854550	46854749	FALSE	other	2.0843	0.00348319	1.51956	0.0655666	0.838435	0.999993
70250	chr1	47899050	47899249	FALSE	other	0.0944646	0.895325	2.6981	0.00149078	-0.784912	0.999993
70251	chr1	48527650	48527799	FALSE	other	-0.354965	0.618566	3.19453	0.000312302	-1.73077	0.720545
70252	chr1	50528600	50528749	FALSE	other	2.05593	0.00394176	1.03102	0.210051	0.936467	0.999993
70253	chr1	50926450	50928399	FALSE	Stable	3.79628	1.32517e-06	3.43528	0.000169854	0.00871502	0.999993
70254	chr1	50987300	50987449	FALSE	other	2.59263	0.000318847	-0.544085	0.508603	1.59169	0.999993
70255	chr1	51029300	51029399	FALSE	other	1.92331	0.00694757	-0.0792064	0.924152	0.349361	0.999993
70256	chr1	51333600	51334049	FALSE	Stable	1.77192	0.0127848	3.68538	0.000101899	-0.289108	0.999993
70257	chr1	51477300	51478399	FALSE	Stable	4.03842	5.138e-07	3.00451	0.000546531	0.276318	0.999993
70258	chr1	51478650	51479149	FALSE	Stable	2.68144	0.000205139	3.40077	0.000185495	-0.192799	0.999993
70259	chr1	51697350	51697949	FALSE	Stable	2.25438	0.00161511	2.93775	0.00067148	-0.270612	0.999993
70260	chr1	51914350	51914549	FALSE	other	2.82224	0.00010237	1.4561	0.0775878	0.256267	0.999993
70261	chr1	51915000	51915299	TRUE	other	2.62487	0.00027127	1.04977	0.202046	0.435065	0.999993
70262	chr1	51915550	51915899	TRUE	Stable	2.23625	0.00175652	1.71267	0.038455	-0.161759	0.999993
70263	chr1	51930750	51930849	FALSE	other	2.07186	0.00367657	0.416944	0.612809	0.58164	0.999993
70264	chr1	52008550	52009249	FALSE	Stable	3.76044	1.51946e-06	3.49173	0.000149787	0.29907	0.999993
70265	chr1	52080150	52080549	FALSE	Stable	3.54584	3.67989e-06	1.73204	0.0363277	0.122356	0.999993
70266	chr1	52113300	52113799	TRUE	Stable	2.92688	6.1042e-05	2.71583	0.00140364	-0.104269	0.999993
70267	chr1	52118850	52120349	FALSE	Stable	2.9899	4.49769e-05	3.50865	0.000144707	0.134115	0.999993
70268	chr1	52231500	52233199	FALSE	Stable	3.18862	1.73306e-05	3.04002	0.000489317	0.222327	0.999993
70269	chr1	52233450	52233949	FALSE	Stable	3.04358	3.46131e-05	2.56326	0.00237248	0.202776	0.999993
70270	chr1	52499400	52500449	FALSE	Stable	3.60902	2.83863e-06	3.81488	7.80033e-05	0.0576199	0.999993
70271	chr1	52500550	52501049	FALSE	Stable	2.55962	0.000374675	3.5352	0.000136791	-0.144403	0.999993
70272	chr1	52630900	52631499	FALSE	Stable	2.59071	0.00032192	1.70238	0.0396021	0.192028	0.999993
70273	chr1	52726300	52727649	FALSE	Stable	4.62049	4.67539e-08	3.78122	8.22773e-05	0.178243	0.999993
70274	chr1	52816950	52817849	FALSE	Stable	3.40753	6.60695e-06	2.96773	0.0006114	0.20477	0.999993
70275	chr1	52845100	52845949	FALSE	Stable	2.77385	0.000129864	3.03815	0.00049206	0.0539487	0.999993
70276	chr1	52952350	52953549	FALSE	Stable	3.33576	9.07438e-06	3.26545	0.000258611	-0.056718	0.999993
70277	chr1	53201500	53201649	FALSE	Stable	1.8253	0.0103598	3.06717	0.000450813	-0.360157	0.999993
70278	chr1	53202350	53202549	FALSE	other	2.65017	0.000239543	0.626584	0.446251	0.913705	0.999993
70279	chr1	53296150	53296949	FALSE	Stable	2.60719	0.000296193	2.94615	0.000652833	-0.0126224	0.999993
70280	chr1	53297300	53298299	FALSE	Stable	2.94323	5.64556e-05	2.38012	0.00450609	0.0173007	0.999993
70281	chr1	53313000	53313649	FALSE	Stable	2.89369	7.2082e-05	2.68999	0.00153239	-0.0894691	0.999993
70282	chr1	53313700	53314399	FALSE	Stable	3.31706	9.7739e-06	2.25156	0.00699082	0.20447	0.999993
70283	chr1	53351600	53352449	FALSE	Stable	2.78293	0.00012398	3.06906	0.000448812	-0.457085	0.999993
70284	chr1	53394300	53394399	FALSE	other	1.16857	0.099812	2.4673	0.00332829	-0.8439	0.999993
70285	chr1	53706150	53707099	FALSE	Stable	2.76647	0.000134753	2.82614	0.000966969	-0.0755249	0.999993
70286	chr1	53773950	53774149	FALSE	other	-1.35655	0.0562168	3.16296	0.000340576	-1.92128	0.444009
70287	chr1	53784150	53785249	FALSE	Stable	3.45663	5.33328e-06	2.89493	0.000771279	0.0771767	0.999993
70288	chr1	53785400	53785749	FALSE	Stable	2.36842	0.000946014	4.08213	4.05892e-05	0.105015	0.999993
70289	chr1	53940550	53940699	FALSE	Stable	1.4037	0.0481586	2.11154	0.0111555	-0.535122	0.999993
70290	chr1	54193750	54195549	FALSE	Stable	3.45429	5.3921e-06	3.40433	0.000184216	0.116216	0.999993
70291	chr1	54199650	54199799	FALSE	Stable	1.85205	0.00929941	2.54814	0.00250365	-0.52336	0.999993
70292	chr1	54250350	54250499	FALSE	Stable	1.58188	0.0260755	2.18108	0.00885118	-0.274852	0.999993
70293	chr1	54250900	54251299	FALSE	Stable	2.71331	0.000174803	2.69835	0.00149003	0.107325	0.999993
70294	chr1	54438150	54438849	FALSE	Stable	2.70869	0.000179165	2.83004	0.000954401	-0.0717712	0.999993
70295	chr1	54556600	54557799	TRUE	Stable	4.33031	1.56765e-07	3.51448	0.000143348	0.336999	0.999993
70296	chr1	54557950	54558349	TRUE	Stable	2.66659	0.000220799	2.42357	0.00387142	0.0790214	0.999993
70297	chr1	54906500	54906599	FALSE	other	1.1568	0.103245	1.29184	0.116852	0.0376859	0.999993
70298	chr1	54906750	54907299	TRUE	Stable	2.72098	0.000168155	2.45351	0.00349102	0.201963	0.999993
70299	chr1	54915700	54915999	FALSE	other	-0.625762	0.378772	2.55534	0.00244188	-1.14679	0.999993
70300	chr1	54924700	54924949	FALSE	other	1.23889	0.0810524	3.9787	5.46322e-05	-0.473376	0.999993
70301	chr1	54925150	54926899	FALSE	Stable	3.11194	2.50305e-05	3.32165	0.00022475	0.154104	0.999993
70302	chr1	55025850	55026799	FALSE	Stable	3.19554	1.68036e-05	3.15937	0.000343891	0.00328886	0.999993
70303	chr1	55027650	55027849	FALSE	other	2.00056	0.00500788	1.2202	0.138559	0.619174	0.999993
70304	chr1	55052100	55052699	FALSE	Stable	2.92211	6.25667e-05	2.83824	0.000929934	-0.187457	0.999993
70305	chr1	55052950	55053749	FALSE	Stable	3.36243	8.08201e-06	3.05722	0.000464864	-0.0479415	0.999993
70306	chr1	55085900	55086249	FALSE	other	3.00913	4.07951e-05	1.30412	0.113458	-0.0060332	0.999993
70307	chr1	55086350	55087699	FALSE	Stable	3.28922	1.09407e-05	2.77382	0.00115017	0.334507	0.999993
70308	chr1	55088500	55089599	TRUE	Stable	3.16902	1.90552e-05	2.82269	0.000978436	0.167185	0.999993
70309	chr1	55089800	55089999	FALSE	other	2.98145	4.68882e-05	1.58029	0.0556931	0.291283	0.999993
70310	chr1	55130550	55131199	TRUE	Stable	3.59736	2.96149e-06	2.49595	0.00301113	-0.0517946	0.999993
70311	chr1	55131750	55132499	TRUE	Stable	2.84819	9.01477e-05	2.84224	0.000917982	0.000113073	0.999993
70312	chr1	55224450	55224699	FALSE	Stable	2.6348	0.000258056	1.86053	0.0247506	-0.365763	0.999993
70313	chr1	55224850	55226999	FALSE	Stable	3.78405	1.37714e-06	2.9073	0.000741431	0.0140558	0.999993
70314	chr1	55236450	55237099	TRUE	Stable	2.00036	0.00501213	2.97866	0.00059124	-0.158508	0.999993
70315	chr1	55237250	55239049	TRUE	Stable	3.56374	3.41542e-06	3.22082	0.000290821	0.159741	0.999993
70316	chr1	55239150	55239399	FALSE	Stable	1.41367	0.04661	3.0311	0.000503693	0.0106332	0.999993
70317	chr1	55363500	55363749	FALSE	Stable	1.93833	0.00652089	2.01742	0.0151307	-0.074021	0.999993
70318	chr1	55363800	55363999	FALSE	Stable	1.52921	0.0314352	3.09638	0.000414587	-0.155262	0.999993
70319	chr1	55405300	55407149	FALSE	Stable	3.78835	1.35893e-06	3.88778	6.58868e-05	0.13269	0.999993
70320	chr1	56969600	56969899	FALSE	Stable	2.32849	0.00114129	2.6004	0.00208632	0.69081	0.999993
70321	chr1	56969950	56970149	FALSE	other	1.39123	0.0501848	2.15271	0.00971941	-0.564855	0.999993
70322	chr1	56970600	56970749	FALSE	other	0.0855253	0.904915	2.04327	0.0139368	-0.550342	0.999993
70323	chr1	56970800	56973999	TRUE	Stable	3.30642	1.01853e-05	3.23033	0.000283721	0.081814	0.999993
70324	chr1	56976950	56977399	FALSE	Stable	1.64716	0.0205296	3.40609	0.00018338	-0.45346	0.999993
70325	chr1	56977550	56977949	FALSE	Stable	1.6223	0.0225027	2.7215	0.00137501	-0.0854012	0.999993
70326	chr1	56980500	56980849	FALSE	Stable	1.68169	0.0180661	1.88487	0.0229388	-0.00655896	0.999993
70327	chr1	57096350	57096549	TRUE	other	2.18317	0.00224084	0.652202	0.428018	0.682088	0.999993
70328	chr1	57096850	57096999	TRUE	other	3.60771	2.83863e-06	1.01986	0.215019	-0.167952	0.999993
70329	chr1	57205500	57205699	FALSE	other	1.92207	0.00697677	0.872564	0.288801	0.112427	0.999993
70330	chr1	57376800	57377449	FALSE	Stable	2.81699	0.000105013	2.75925	0.00120747	0.4152	0.999993
70331	chr1	57377700	57378649	FALSE	Stable	3.05834	3.2296e-05	3.05006	0.000475196	0.0138325	0.999993
70332	chr1	57405600	57406399	TRUE	Stable	2.99173	4.45585e-05	2.7121	0.00142111	0.0298465	0.999993
70333	chr1	57406600	57407599	TRUE	Stable	2.43788	0.000679002	3.24037	0.00027617	-0.0773092	0.999993
70334	chr1	57407650	57408249	FALSE	Stable	1.68459	0.0178672	2.77906	0.00113234	0.16463	0.999993
70335	chr1	57429850	57430099	FALSE	other	2.481	0.000550991	0.859737	0.29591	0.632554	0.999993
70336	chr1	57430150	57430249	FALSE	other	1.21568	0.086829	3.25712	0.00026399	-0.61645	0.999993
70337	chr1	57480150	57480249	FALSE	other	2.70543	0.000181901	1.00094	0.223661	1.70449	0.779617
70338	chr1	57773850	57776099	FALSE	Stable	3.66622	2.27025e-06	3.07892	0.00043618	0.0643484	0.999993
70339	chr1	57969100	57970099	FALSE	Stable	3.35064	8.54376e-06	2.2793	0.00636635	-0.000270365	0.999993
70340	chr1	57995450	57995649	FALSE	Stable	1.98469	0.0053646	2.0738	0.0126217	-0.496263	0.999993
70341	chr1	57996150	57997249	FALSE	Stable	4.24864	2.25826e-07	3.41429	0.000179636	0.138045	0.999993
70342	chr1	58391700	58392999	TRUE	Stable	3.39227	7.03335e-06	3.01102	0.000535742	-0.027505	0.999993
70343	chr1	58393500	58394449	FALSE	Stable	3.10504	2.58175e-05	2.7535	0.00123294	0.25342	0.999993
70344	chr1	58422400	58423299	FALSE	Stable	2.59214	0.000319588	4.02202	4.76271e-05	0.233933	0.999993
70345	chr1	58423500	58423649	FALSE	Stable	1.5496	0.0292584	2.20081	0.00828759	0.401983	0.999993
70346	chr1	58444550	58445349	FALSE	Stable	2.85711	8.63248e-05	2.89164	0.000779876	0.062718	0.999993
70347	chr1	58445700	58446699	FALSE	Stable	3.02044	3.86878e-05	3.07905	0.000436053	-0.169043	0.999993
70348	chr1	58503750	58504949	FALSE	Stable	3.60916	2.83848e-06	3.44364	0.000167165	-0.0842537	0.999993
70349	chr1	58585250	58586199	FALSE	Stable	2.99562	4.36979e-05	4.57508	8.83094e-06	-0.119353	0.999993
70350	chr1	58586600	58587449	FALSE	Stable	2.07411	0.00364029	2.75451	0.00122857	-0.223609	0.999993
70351	chr1	58652400	58653249	FALSE	Stable	3.2825	1.12641e-05	3.5964	0.000119663	0.0561659	0.999993
70352	chr1	58711200	58712749	FALSE	Stable	3.02542	3.78392e-05	3.23921	0.000276929	-0.201756	0.999993
70353	chr1	58713150	58714449	FALSE	Stable	2.58132	0.000336348	3.11733	0.000389675	-0.0896833	0.999993
70354	chr1	58714550	58714799	FALSE	other	2.38012	0.000894567	0.782513	0.341565	0.969526	0.999993
70355	chr1	58795350	58796299	FALSE	Stable	3.72729	1.74213e-06	3.44188	0.000168146	0.44964	0.999993
70356	chr1	58961750	58961899	FALSE	other	1.49303	0.0356447	-0.946177	0.249905	1.31058	0.999993
70357	chr1	58972600	58973299	TRUE	Stable	3.1185	2.42606e-05	2.66427	0.00167181	0.0329943	0.999993
70358	chr1	58973650	58974649	TRUE	Stable	3.15329	2.05936e-05	3.51151	0.000143773	0.408054	0.999993
70359	chr1	59119400	59119599	TRUE	Stable	1.90632	0.00744314	2.29739	0.0059892	0.175562	0.999993
70360	chr1	59120050	59120699	TRUE	Stable	2.88097	7.66772e-05	2.59457	0.0021294	0.431075	0.999993
70361	chr1	59236600	59237299	FALSE	Stable	3.10794	2.54714e-05	3.20391	0.000305311	0.176939	0.999993
70362	chr1	59237500	59238249	FALSE	Stable	3.35041	8.54847e-06	3.18585	0.00032021	0.139743	0.999993
70363	chr1	59238350	59238449	FALSE	other	-0.520676	0.464688	3.25712	0.00026399	-1.17958	0.999993
70364	chr1	59252950	59253449	FALSE	Stable	3.04908	3.36773e-05	2.23625	0.00735459	0.0966869	0.999993
70365	chr1	59253650	59253799	FALSE	other	1.4128	0.0467285	1.1812	0.151497	-0.841683	0.999993
70366	chr1	59269700	59270049	TRUE	other	1.34069	0.0591444	2.34593	0.00507068	-0.400926	0.999993
70367	chr1	59270400	59270749	TRUE	Stable	1.59896	0.02451	2.83905	0.00092782	-0.0935934	0.999993
70368	chr1	59332700	59332849	FALSE	other	1.8876	0.0080469	-0.2615	0.751836	2.00294	0.338758
70369	chr1	59368100	59368399	FALSE	other	2.72106	0.000168098	0.416128	0.613509	1.33968	0.999993
70370	chr1	59376250	59376399	FALSE	other	1.18404	0.0953828	3.95645	5.70804e-05	-0.644696	0.999993
70371	chr1	59480500	59481899	TRUE	Stable	3.0667	3.09891e-05	2.82904	0.000957868	0.112882	0.999993
70372	chr1	59482150	59486599	FALSE	Stable	3.40696	6.62174e-06	3.15471	0.000348541	0.106444	0.999993
70373	chr1	59487300	59487499	FALSE	Stable	1.4371	0.0431196	2.54098	0.00256674	-0.0506844	0.999993
70374	chr1	59515800	59516399	FALSE	Stable	2.89931	7.00073e-05	3.49495	0.000149125	0.134609	0.999993
70375	chr1	59592400	59592499	FALSE	other	1.1568	0.103245	2.32482	0.0054503	-0.0104562	0.999993
70376	chr1	59602850	59602999	FALSE	other	1.28044	0.0713263	1.4372	0.0814382	-0.686767	0.999993
70377	chr1	59604000	59604249	FALSE	Stable	1.67045	0.0188288	3.44722	0.000165524	-0.364857	0.999993
70378	chr1	59669500	59670649	FALSE	Stable	3.23296	1.41367e-05	3.32377	0.000223646	0.0138645	0.999993
70379	chr1	59670850	59671649	FALSE	Stable	2.62675	0.00026869	2.87044	0.000833529	-0.159357	0.999993
70380	chr1	59684350	59684849	FALSE	Stable	3.01853	3.90685e-05	3.06892	0.000448942	0.0129598	0.999993
70381	chr1	59685200	59686699	FALSE	Stable	2.88365	7.56843e-05	2.84547	0.000907426	-0.0695364	0.999993
70382	chr1	59762150	59763349	TRUE	Stable	3.01812	3.91334e-05	2.75673	0.00121863	-0.00629618	0.999993
70383	chr1	59763700	59764149	TRUE	Stable	2.50538	0.000488678	2.46253	0.00338493	0.286539	0.999993
70384	chr1	59764350	59765899	FALSE	Stable	3.1201	2.40809e-05	3.47162	0.000157892	0.00783467	0.999993
70385	chr1	59766000	59766999	FALSE	Stable	2.40683	0.000787516	2.92418	0.000701684	-0.353117	0.999993
70386	chr1	59912250	59912699	FALSE	Stable	2.48275	0.000546307	3.48887	0.000150708	0.140381	0.999993
70387	chr1	59912950	59914349	TRUE	Stable	3.11529	2.46438e-05	2.65721	0.00171208	0.049233	0.999993
70388	chr1	60042500	60043699	FALSE	Stable	3.55289	3.56741e-06	3.48561	0.000152438	-0.00101817	0.999993
70389	chr1	60096650	60097999	TRUE	Stable	3.44494	5.609e-06	3.70182	9.83448e-05	0.0694482	0.999993
70390	chr1	60098450	60099199	TRUE	Stable	3.10855	2.54002e-05	2.70908	0.00143592	0.0463278	0.999993
70391	chr1	60179650	60180249	FALSE	Stable	3.43481	5.85243e-06	2.5105	0.0028597	0.175137	0.999993
70392	chr1	60180750	60181599	FALSE	Stable	2.90088	6.94417e-05	2.77833	0.00113379	0.267236	0.999993
70393	chr1	60342700	60343199	FALSE	Stable	2.322	0.00117709	2.8715	0.000830202	-0.098102	0.999993
70394	chr1	60343550	60344399	FALSE	Stable	3.20189	1.63085e-05	2.86181	0.000857975	0.0130868	0.999993
70395	chr1	60408750	60409299	TRUE	Stable	2.11623	0.00302214	3.52568	0.000140568	-0.00663492	0.999993
70396	chr1	60409850	60410049	TRUE	Stable	3.9273	7.84224e-07	1.99302	0.0163712	-0.131366	0.999993
70397	chr1	60410250	60410899	FALSE	Stable	3.11157	2.50681e-05	2.56756	0.00233694	0.266481	0.999993
70398	chr1	60565400	60566649	FALSE	Stable	3.03942	3.53475e-05	2.89542	0.000770747	0.258657	0.999993
70399	chr1	60567000	60567549	FALSE	Stable	3.34583	8.69749e-06	3.05156	0.000472693	0.130278	0.999993
70400	chr1	60978750	60979049	FALSE	other	-0.356964	0.61665	3.8519	7.14204e-05	-1.4227	0.999993
70401	chr1	61055550	61055649	FALSE	other	0.741485	0.296671	2.02068	0.014975	-0.121628	0.999993
70402	chr1	61139150	61139549	FALSE	Stable	2.7736	0.000130042	1.72006	0.0376339	0.6798	0.999993
70403	chr1	61141750	61141999	FALSE	Stable	2.56316	0.000368135	2.56085	0.00239294	-0.13396	0.999993
70404	chr1	61233850	61233999	TRUE	Stable	2.51137	0.000475121	4.21009	2.82785e-05	0.120004	0.999993
70405	chr1	61234100	61234399	TRUE	Stable	2.42695	0.000715018	2.91854	0.000713898	-0.383399	0.999993
70406	chr1	61234450	61234649	TRUE	Stable	2.16586	0.00242094	2.17619	0.00899829	-0.417487	0.999993
70407	chr1	61301350	61301649	TRUE	Stable	2.78752	0.000121158	2.60562	0.00204862	0.354624	0.999993
70408	chr1	61407550	61407749	TRUE	other	1.21923	0.0859429	2.08656	0.012108	-1.0036	0.999993
70409	chr1	61638500	61639749	FALSE	Stable	3.30965	1.00441e-05	3.36133	0.000203986	0.0692816	0.999993
70410	chr1	61861750	61861949	FALSE	other	0.582044	0.413185	3.23198	0.000282458	-1.76822	0.662074
70411	chr1	62017100	62017199	FALSE	other	0.487026	0.493783	3.19919	0.000308544	-1.28717	0.999993
70412	chr1	62020300	62020449	FALSE	other	0.809928	0.254105	2.80551	0.00103537	-0.838016	0.999993
70413	chr1	62319350	62319549	FALSE	other	2.4994	0.000503357	0.341194	0.678951	1.08493	0.999993
70414	chr1	62563150	62563299	TRUE	other	1.84778	0.00946094	0.978256	0.234248	0.153378	0.999993
70415	chr1	62591300	62591399	FALSE	other	0.899118	0.205612	1.4458	0.0796463	-0.666722	0.999993
70416	chr1	62648200	62648699	TRUE	other	1.15628	0.103404	3.71433	9.59701e-05	-0.498143	0.999993
70417	chr1	62702600	62704449	FALSE	Stable	3.51927	4.10692e-06	3.52419	0.000140568	0.0691506	0.999993
70418	chr1	62704500	62704749	FALSE	Stable	2.07113	0.0036882	2.37481	0.00458915	-0.67742	0.999993
70419	chr1	62704950	62705299	FALSE	Stable	2.67335	0.00021339	2.02183	0.0149323	-0.207163	0.999993
70420	chr1	62705550	62707799	FALSE	Stable	4.02567	5.35796e-07	3.41779	0.000177646	0.0564447	0.999993
70421	chr1	62708350	62708699	FALSE	other	3.33752	9.007e-06	0.1836	0.824521	1.17422	0.999993
70422	chr1	62767250	62767499	TRUE	Stable	2.33749	0.00109433	2.21377	0.00794244	-0.0125505	0.999993
70423	chr1	62851450	62851899	FALSE	Stable	3.10643	2.56506e-05	2.92968	0.000688551	0.450445	0.999993
70424	chr1	62860000	62860099	FALSE	other	0.698493	0.325533	2.55306	0.00245936	-1.39973	0.999993
70425	chr1	62888000	62888149	FALSE	other	0.853136	0.22967	3.25017	0.000269044	-0.0149716	0.999993
70426	chr1	63112300	63112599	FALSE	other	0.933197	0.188898	3.2149	0.000295661	-0.653636	0.999993
70427	chr1	63112700	63113899	FALSE	Stable	3.09642	2.68815e-05	3.68782	0.000101451	0.166928	0.999993
70428	chr1	63114400	63114549	FALSE	Stable	1.68334	0.0179527	2.32232	0.00549629	0.772931	0.999993
70429	chr1	63114650	63115549	FALSE	Stable	3.14887	2.10092e-05	2.94212	0.000661836	0.190898	0.999993
70430	chr1	63115850	63115999	FALSE	Stable	2.46201	0.000603383	2.85558	0.00087668	0.061266	0.999993
70431	chr1	63129600	63130449	FALSE	Stable	2.30602	0.00126877	2.64122	0.00180898	0.57354	0.999993
70432	chr1	63175500	63176549	FALSE	Stable	2.66938	0.000217816	3.89076	6.58868e-05	0.138676	0.999993
70433	chr1	63177200	63178399	FALSE	Stable	3.22678	1.45085e-05	2.89078	0.000782024	0.0425268	0.999993
70434	chr1	63214150	63214449	FALSE	Stable	2.95834	5.23944e-05	1.9433	0.019157	-0.377125	0.999993
70435	chr1	63246700	63246899	TRUE	other	0.238898	0.73837	2.61814	0.0019613	-0.563231	0.999993
70436	chr1	63247150	63247399	TRUE	Stable	2.11951	0.00297882	2.29419	0.00605413	-0.00194812	0.999993
70437	chr1	63247850	63248649	FALSE	Stable	2.39814	0.00082039	2.46293	0.00338063	-0.0809673	0.999993
70438	chr1	63272800	63274349	FALSE	Stable	2.63969	0.000252138	2.27744	0.00640724	0.296097	0.999993
70439	chr1	63445550	63447099	FALSE	Stable	3.83873	1.10533e-06	3.19747	0.000310008	0.180127	0.999993
70440	chr1	63729950	63731549	FALSE	Stable	3.23442	1.40409e-05	3.43266	0.000171118	0.0183754	0.999993
70441	chr1	63768500	63768749	FALSE	other	0.428746	0.547064	2.79295	0.00107992	-1.12307	0.999993
70442	chr1	64020800	64021049	FALSE	other	2.73233	0.00015945	0.198886	0.810091	0.29873	0.999993
70443	chr1	64119200	64119649	FALSE	other	2.62918	0.000265513	1.15734	0.159918	-0.120784	0.999993
70444	chr1	64119900	64121499	FALSE	Stable	3.56117	3.45129e-06	4.37979	1.57552e-05	0.0860915	0.999993
70445	chr1	64122250	64122699	FALSE	Stable	2.4003	0.000811931	1.79627	0.0300231	-0.0144899	0.999993
70446	chr1	64531500	64532649	FALSE	Stable	3.1887	1.73251e-05	3.55454	0.000130957	0.0108573	0.999993
70447	chr1	64533550	64534749	FALSE	Stable	3.0061	4.14214e-05	3.08166	0.000432443	-0.0306258	0.999993
70448	chr1	64534900	64535099	FALSE	other	2.01968	0.0046114	1.09919	0.18156	-0.189382	0.999993
70449	chr1	64616400	64618349	TRUE	Stable	3.45913	5.27321e-06	3.22203	0.000289619	0.289666	0.999993
70450	chr1	64689650	64690649	FALSE	Stable	2.95333	5.36346e-05	3.28088	0.000248569	0.0532538	0.999993
70451	chr1	64691000	64692549	FALSE	Stable	3.00402	4.18401e-05	2.97759	0.000593062	-0.154295	0.999993
70452	chr1	64734650	64734949	FALSE	other	1.3681	0.0541311	2.98152	0.000585567	-0.56895	0.999993
70453	chr1	64735900	64737799	FALSE	Stable	3.43069	5.9669e-06	3.38548	0.000192372	0.0287525	0.999993
70454	chr1	64738100	64739249	FALSE	Stable	2.86756	8.20306e-05	3.23336	0.000281836	0.23691	0.999993
70455	chr1	64955900	64956649	FALSE	Stable	2.78855	0.000120562	2.98491	0.000580439	-0.24094	0.999993
70456	chr1	64957050	64957349	FALSE	Stable	1.74487	0.0142165	2.605	0.00205291	-0.535786	0.999993
70457	chr1	64994300	64994549	FALSE	other	1.0285	0.14753	2.81374	0.0010089	-0.160895	0.999993
70458	chr1	65112450	65112949	FALSE	Stable	1.71071	0.0161729	2.38496	0.0044286	-0.261494	0.999993
70459	chr1	65178100	65178249	FALSE	Stable	2.32402	0.00116552	2.43719	0.00369391	-0.00498	0.999993
70460	chr1	65178350	65179099	TRUE	Stable	2.85561	8.69509e-05	3.68551	0.000101899	-0.0766377	0.999993
70461	chr1	65179400	65179999	TRUE	Stable	3.66997	2.23684e-06	3.02497	0.000513657	0.475352	0.999993
70462	chr1	65185750	65186549	FALSE	Stable	2.52965	0.000434326	2.61134	0.00200734	0.0455075	0.999993
70463	chr1	65186800	65187899	FALSE	Stable	3.83209	1.13894e-06	3.7934	8.09446e-05	-0.132273	0.999993
70464	chr1	65213600	65213749	FALSE	other	-0.986645	0.164687	2.45366	0.00348966	-0.842084	0.999993
70465	chr1	65311200	65312099	FALSE	Stable	3.32493	9.50571e-06	2.89785	0.000764367	-0.138231	0.999993
70466	chr1	65640500	65640599	FALSE	other	1.03384	0.145448	0.485416	0.555581	1.43014	0.999993
70467	chr1	66174800	66176449	FALSE	Stable	3.61381	2.78708e-06	2.8014	0.00105029	0.0501059	0.999993
70468	chr1	66321500	66321649	FALSE	other	3.21374	1.54065e-05	0.36814	0.654989	0.890607	0.999993
70469	chr1	66321900	66322149	FALSE	Stable	3.43848	5.75815e-06	2.52664	0.00270136	0.0629582	0.999993
70470	chr1	66322300	66322449	FALSE	other	1.37614	0.0527303	1.70083	0.0397701	-0.470842	0.999993
70471	chr1	66467750	66468799	FALSE	Stable	3.18482	1.76821e-05	2.98757	0.000575837	0.0775019	0.999993
70472	chr1	66701000	66701149	FALSE	other	1.62057	0.0226476	1.53627	0.0627319	0.5966	0.999993
70473	chr1	66701200	66702049	FALSE	Stable	3.30415	1.0279e-05	3.45334	0.000163554	-0.0996047	0.999993
70474	chr1	66815650	66816799	FALSE	Stable	3.12171	2.38833e-05	3.21787	0.000293397	0.0325396	0.999993
70475	chr1	66817700	66818549	TRUE	Stable	3.45212	5.43771e-06	3.29763	0.000238989	0.109905	0.999993
70476	chr1	66861850	66861999	FALSE	other	1.00248	0.15799	2.84684	0.000903117	-1.38952	0.999993
70477	chr1	66862250	66863599	FALSE	Stable	3.44738	5.54505e-06	2.78327	0.00111507	0.271796	0.999993
70478	chr1	67038000	67039399	FALSE	Stable	2.6938	0.000192839	2.87754	0.000813503	0.130086	0.999993
70479	chr1	67236050	67236299	FALSE	other	1.01627	0.152421	2.51854	0.00277809	-0.0903619	0.999993
70480	chr1	68047100	68047299	FALSE	Stable	1.83627	0.00990793	1.94075	0.0193138	-0.240751	0.999993
70481	chr1	69105250	69108549	FALSE	Stable	4.09301	4.25451e-07	3.34225	0.000213748	-0.0368072	0.999993
70482	chr1	69591750	69591899	FALSE	other	2.28761	0.00138347	1.39356	0.090977	0.17791	0.999993
70483	chr1	69592050	69592249	FALSE	other	0.483018	0.497417	1.94605	0.0189906	0.228529	0.999993
70484	chr1	69685400	69685849	FALSE	Stable	2.53608	0.000420446	2.79744	0.00106449	-0.414164	0.999993
70485	chr1	69686000	69687299	FALSE	Stable	3.88692	9.24577e-07	3.44015	0.000168633	0.0936225	0.999993
70486	chr1	69687550	69688649	FALSE	Stable	3.58209	3.1529e-06	2.64968	0.00175698	0.0278439	0.999993
70487	chr1	69826700	69827299	FALSE	Stable	2.63349	0.000259857	1.95457	0.0184975	0.165683	0.999993
70488	chr1	70539300	70539449	FALSE	other	0.414941	0.559773	2.79496	0.00107278	-0.252305	0.999993
70489	chr1	71100250	71100599	FALSE	Stable	2.40567	0.000791705	4.40768	1.41835e-05	-0.183281	0.999993
70490	chr1	71101900	71102399	FALSE	Stable	2.25732	0.00159419	2.81765	0.000995528	0.186823	0.999993
70491	chr1	71102500	71102899	FALSE	Stable	2.48056	0.000552181	2.34079	0.00515865	0.41268	0.999993
70492	chr1	71103400	71103599	FALSE	Stable	2.00843	0.00484056	2.71136	0.00142465	0.134103	0.999993
70493	chr1	71556650	71558149	FALSE	Stable	2.8639	8.35347e-05	3.31491	0.000228573	0.0580854	0.999993
70494	chr1	71650900	71653249	TRUE	Stable	2.95523	5.31528e-05	3.54278	0.000134794	0.108723	0.999993
70495	chr1	71653450	71654549	TRUE	Stable	3.60975	2.83175e-06	3.6361	0.000111012	0.0851272	0.999993
70496	chr1	71837150	71837699	FALSE	Stable	2.54197	0.00040858	2.14059	0.0101317	-0.0068688	0.999993
70497	chr1	72142300	72142449	FALSE	other	0.42296	0.552297	1.61642	0.0504571	-0.356429	0.999993
70498	chr1	72183200	72183449	FALSE	Stable	1.65382	0.0200278	2.32906	0.00537042	-0.567047	0.999993
70499	chr1	72188300	72188499	FALSE	other	1.00906	0.155297	2.93799	0.000671097	0.0533492	0.999993
70500	chr1	72211300	72212749	FALSE	Stable	3.83434	1.12305e-06	3.79504	8.09446e-05	0.16801	0.999993
70501	chr1	72225500	72225649	FALSE	Stable	1.47105	0.0384326	3.24563	0.000271782	-0.362672	0.999993
70502	chr1	72225700	72226099	FALSE	Stable	2.76648	0.00013475	1.90904	0.021295	-0.170642	0.999993
70503	chr1	72236050	72237299	FALSE	Stable	2.89022	7.32833e-05	2.77571	0.00114261	0.0304595	0.999993
70504	chr1	72243600	72244399	TRUE	Stable	2.37176	0.000931441	3.29846	0.00023823	0.0176156	0.999993
70505	chr1	72254200	72254999	TRUE	Stable	2.59075	0.000321877	2.51346	0.00282938	-0.266121	0.999993
70506	chr1	72255050	72255199	TRUE	other	1.3538	0.0567193	3.43745	0.000169208	0.298407	0.999993
70507	chr1	72283750	72284299	FALSE	Stable	2.61792	0.000280518	4.06582	4.19147e-05	-0.115498	0.999993
70508	chr1	72284450	72284949	FALSE	Stable	1.8745	0.00848545	2.94055	0.000665603	-0.244804	0.999993
70509	chr1	72306900	72307349	TRUE	Stable	3.98942	6.2734e-07	2.83194	0.000948025	0.0288479	0.999993
70510	chr1	72307500	72308749	TRUE	Stable	3.2002	1.64427e-05	2.49121	0.00306262	0.137908	0.999993
70511	chr1	72308800	72308899	FALSE	other	0.150143	0.833715	3.43745	0.000169208	-0.905249	0.999993
70512	chr1	72536300	72536849	FALSE	other	1.32382	0.0623298	3.26599	0.000258194	-0.636701	0.999993
70513	chr1	72577050	72577599	FALSE	Stable	3.65265	2.38462e-06	1.85043	0.0255261	-0.0135813	0.999993
70514	chr1	72578850	72579199	FALSE	other	0.984524	0.165525	2.41248	0.00402591	-0.596788	0.999993
70515	chr1	72582750	72582999	FALSE	Stable	1.70752	0.016374	3.0579	0.000463616	0.206082	0.999993
70516	chr1	72583300	72583399	FALSE	other	0.458059	0.519715	2.19002	0.00859115	-1.30489	0.999993
70517	chr1	72583600	72584299	FALSE	Stable	2.16518	0.00242841	2.49691	0.00300091	-0.308319	0.999993
70518	chr1	72585000	72585099	FALSE	other	0.886968	0.211692	0.0492629	0.952961	-0.554452	0.999993
70519	chr1	72641150	72641399	FALSE	Stable	2.93338	5.9096e-05	1.95634	0.0183966	0.569889	0.999993
70520	chr1	72711800	72713249	FALSE	Stable	3.29291	1.07768e-05	2.87402	0.000823256	0.177467	0.999993
70521	chr1	72823750	72824349	FALSE	Stable	3.08601	2.82102e-05	4.08229	4.05892e-05	0.0899546	0.999993
70522	chr1	72824450	72826449	FALSE	Stable	3.67799	2.15321e-06	3.64336	0.000109802	0.0938513	0.999993
70523	chr1	72826750	72827149	FALSE	Stable	2.86564	8.28054e-05	3.00046	0.000552986	-0.271089	0.999993
70524	chr1	72870050	72872999	FALSE	Stable	3.4498	5.49069e-06	3.87013	6.8658e-05	-0.107884	0.999993
70525	chr1	72873100	72875399	FALSE	Stable	3.62732	2.63546e-06	3.66372	0.000106364	0.029864	0.999993
70526	chr1	72878550	72878699	FALSE	Stable	1.57715	0.0265134	2.80717	0.0010302	-1.89333	0.4718
70527	chr1	72879200	72879349	FALSE	Stable	1.44524	0.0419423	3.24683	0.000270644	0.0171259	0.999993
70528	chr1	72946100	72946249	FALSE	other	2.43072	0.000702989	0.126124	0.8791	1.23132	0.999993
70529	chr1	73363400	73363899	TRUE	Stable	2.28352	0.00141079	1.88313	0.023064	0.0850658	0.999993
70530	chr1	73758300	73758549	FALSE	other	3.31595	9.80987e-06	0.425937	0.605188	0.241962	0.999993
70531	chr1	73758700	73758799	FALSE	other	0.783055	0.270309	2.13865	0.0101912	0.0518034	0.999993
70532	chr1	74036950	74037349	FALSE	Stable	2.12633	0.00288884	3.09384	0.000417703	0.132784	0.999993
70533	chr1	74041300	74041799	TRUE	Stable	4.03817	5.138e-07	2.46487	0.00335794	0.2756	0.999993
70534	chr1	74042050	74042399	TRUE	Stable	2.56742	0.000360414	2.24238	0.00720463	0.161041	0.999993
70535	chr1	74068200	74068799	FALSE	Stable	3.45809	5.30505e-06	3.23583	0.000279721	0.0610712	0.999993
70536	chr1	74068950	74069149	FALSE	Stable	1.59974	0.024443	2.73759	0.00130139	-0.0846531	0.999993
70537	chr1	74089850	74091449	TRUE	Stable	3.16642	1.92947e-05	2.99962	0.000554509	0.201379	0.999993
70538	chr1	74091500	74091999	TRUE	Stable	2.82851	9.92006e-05	2.33768	0.00521532	0.187624	0.999993
70539	chr1	74092200	74092399	FALSE	other	2.62396	0.000272347	0.911162	0.267978	0.190431	0.999993
70540	chr1	74097950	74099349	FALSE	Stable	3.38071	7.39643e-06	3.93546	5.99725e-05	0.231223	0.999993
70541	chr1	74123850	74124049	FALSE	other	1.25457	0.0772402	4.52356	1.02415e-05	-0.670779	0.999993
70542	chr1	74124100	74125299	FALSE	Stable	3.23551	1.39855e-05	3.24305	0.000273985	0.0143886	0.999993
70543	chr1	74235700	74236349	FALSE	Stable	3.76012	1.52042e-06	2.89273	0.000777153	0.0609127	0.999993
70544	chr1	74236850	74238149	FALSE	Stable	3.31343	9.91127e-06	3.14866	0.000355065	-0.0140787	0.999993
70545	chr1	74283650	74284599	FALSE	Stable	3.05715	3.245e-05	3.6615	0.000106995	0.0238432	0.999993
70546	chr1	74285050	74285999	FALSE	Stable	3.32947	9.32621e-06	2.05934	0.0132316	0.450929	0.999993
70547	chr1	74303550	74304699	FALSE	Stable	3.29578	1.06506e-05	3.10342	0.00040626	0.0989921	0.999993
70548	chr1	74332350	74333649	FALSE	Stable	3.02588	3.77398e-05	3.06446	0.000454672	0.01398	0.999993
70549	chr1	74368250	74368649	FALSE	Stable	2.90379	6.85114e-05	2.27018	0.00656126	-0.0163284	0.999993
70550	chr1	74387050	74387199	TRUE	other	2.14631	0.00264239	1.41341	0.0865334	0.325751	0.999993
70551	chr1	74390200	74390349	FALSE	Stable	1.92331	0.00694757	3.16371	0.000340218	-1.32884	0.999993
70552	chr1	74391950	74393149	TRUE	Stable	3.3415	8.85867e-06	3.04651	0.000479904	0.278797	0.999993
70553	chr1	74397000	74397249	FALSE	Stable	2.81106	0.000107963	2.60047	0.00208599	0.38332	0.999993
70554	chr1	74397650	74398249	FALSE	Stable	2.8738	7.95108e-05	2.46604	0.0033437	0.339471	0.999993
70555	chr1	74504700	74505599	FALSE	Stable	2.92576	6.14095e-05	3.0727	0.000444282	0.0281408	0.999993
70556	chr1	74506150	74507899	TRUE	Stable	2.94108	5.70394e-05	3.33818	0.000216409	0.0452716	0.999993
70557	chr1	74587150	74587849	TRUE	Stable	3.12031	2.40594e-05	2.46881	0.00331304	0.412393	0.999993
70558	chr1	74588350	74589049	TRUE	Stable	2.44074	0.000669514	3.0206	0.000519732	0.0303425	0.999993
70559	chr1	74600550	74601199	FALSE	Stable	3.66184	2.312e-06	3.62083	0.000113923	0.161175	0.999993
70560	chr1	74601500	74602049	FALSE	Stable	2.90254	6.88386e-05	2.90734	0.000741419	0.169836	0.999993
70561	chr1	74661800	74663199	FALSE	Stable	2.90539	6.79512e-05	3.55665	0.00013052	-0.0485537	0.999993
70562	chr1	74713000	74714499	FALSE	Stable	3.12105	2.39669e-05	2.95805	0.000630049	0.24386	0.999993
70563	chr1	74714550	74714699	FALSE	Stable	1.61228	0.0233475	2.03658	0.0142365	0.412741	0.999993
70564	chr1	74714900	74715349	FALSE	Stable	2.18003	0.00227141	2.95849	0.000629587	-0.0998999	0.999993
70565	chr1	74748800	74749049	FALSE	Stable	1.61609	0.0230335	2.42058	0.00391086	-0.386931	0.999993
70566	chr1	74771350	74771799	FALSE	Stable	2.72125	0.000167943	2.75972	0.00120538	-0.196056	0.999993
70567	chr1	74771900	74772299	FALSE	Stable	3.92424	7.95726e-07	2.40481	0.00412829	0.390804	0.999993
70568	chr1	74772400	74772499	FALSE	other	1.85517	0.00918319	1.39791	0.0899873	0.884326	0.999993
70569	chr1	74783850	74784699	FALSE	Stable	2.99739	4.33147e-05	2.96297	0.000619823	0.0680772	0.999993
70570	chr1	74791700	74791949	FALSE	Stable	1.57005	0.0272067	3.20495	0.00030449	0.0566689	0.999993
70571	chr1	74792050	74792249	FALSE	other	2.41851	0.000744307	1.39356	0.090977	0.308808	0.999993
70572	chr1	74795000	74795149	FALSE	other	0.890531	0.209936	2.9245	0.000701005	-0.405908	0.999993
70573	chr1	74800450	74800799	FALSE	other	2.35441	0.00101077	1.48806	0.0713472	0.414085	0.999993
70574	chr1	74803250	74803799	FALSE	Stable	2.56558	0.000363729	2.26885	0.00659144	0.0576163	0.999993
70575	chr1	74806750	74807299	FALSE	Stable	2.79019	0.000119646	2.61199	0.0020037	0.133618	0.999993
70576	chr1	74807700	74808199	FALSE	Stable	1.93913	0.00649931	3.18207	0.000323747	0.160806	0.999993
70577	chr1	74817150	74817599	FALSE	Stable	2.46647	0.000591313	2.68597	0.00155362	-0.169921	0.999993
70578	chr1	74854350	74855699	FALSE	Stable	3.91783	8.19368e-07	2.5847	0.00220192	0.158811	0.999993
70579	chr1	74858400	74858599	FALSE	Stable	2.23465	0.00176961	2.69645	0.0014985	0.779337	0.999993
70580	chr1	74882100	74882549	FALSE	Stable	2.77933	0.000126266	1.79635	0.0300171	-0.386376	0.999993
70581	chr1	74884500	74884799	FALSE	Stable	2.77079	0.00013177	2.03109	0.0144834	0.365958	0.999993
70582	chr1	74900450	74900949	FALSE	Stable	2.39944	0.00081517	2.61476	0.00198359	0.345858	0.999993
70583	chr1	74948150	74948449	FALSE	Stable	1.74487	0.0142165	2.65841	0.00170539	-0.270319	0.999993
70584	chr1	74951100	74951799	FALSE	Stable	2.20771	0.00200392	2.50224	0.0029459	-0.0569968	0.999993
70585	chr1	74964700	74964949	FALSE	Stable	2.90801	6.7067e-05	1.87946	0.023343	0.573397	0.999993
70586	chr1	75040500	75040699	FALSE	other	2.37414	0.000920699	0.630503	0.443398	0.894761	0.999993
70587	chr1	75124200	75125749	TRUE	Stable	2.77357	0.000130042	2.52023	0.00276242	-0.0775756	0.999993
70588	chr1	75141100	75142699	FALSE	Stable	4.09155	4.29433e-07	3.34604	0.000211667	-0.018674	0.999993
70589	chr1	75142750	75143599	FALSE	Stable	2.60373	0.00030145	3.01634	0.000526585	0.124059	0.999993
70590	chr1	75168200	75168599	FALSE	Stable	2.45802	0.00061539	2.86875	0.000838433	0.115801	0.999993
70591	chr1	75168800	75169449	FALSE	Stable	2.85444	8.74409e-05	3.36393	0.000202843	-0.0465756	0.999993
70592	chr1	75179350	75180399	FALSE	Stable	3.91081	8.3827e-07	3.67069	0.000104149	0.254199	0.999993
70593	chr1	75191250	75191899	FALSE	Stable	2.94227	5.6701e-05	3.03371	0.000499946	0.278625	0.999993
70594	chr1	75192200	75193299	FALSE	Stable	2.85286	8.80718e-05	3.27988	0.000249212	0.162753	0.999993
70595	chr1	75208800	75209799	FALSE	Stable	3.01592	3.95001e-05	2.76395	0.00118976	0.073119	0.999993
70596	chr1	75210100	75210849	FALSE	Stable	3.05219	3.32334e-05	2.8476	0.000901273	0.106475	0.999993
70597	chr1	75210950	75211899	FALSE	Stable	3.4667	5.10747e-06	3.19909	0.000308544	-0.119391	0.999993
70598	chr1	75218300	75220149	FALSE	Stable	3.13831	2.20851e-05	3.51655	0.000142618	-0.00132384	0.999993
70599	chr1	75235850	75236349	FALSE	Stable	3.95984	6.87002e-07	4.24451	2.48385e-05	-0.0109744	0.999993
70600	chr1	75236400	75237349	FALSE	Stable	3.26898	1.19592e-05	2.91084	0.000733393	0.233359	0.999993
70601	chr1	75251600	75251749	FALSE	other	1.98135	0.00544043	1.3138	0.110818	-0.181332	0.999993
70602	chr1	75316200	75317399	FALSE	Stable	3.23003	1.43051e-05	2.82619	0.000966969	0.270942	0.999993
70603	chr1	75318050	75318299	FALSE	other	2.50705	0.000484941	1.59518	0.0534723	0.504724	0.999993
70604	chr1	75338400	75338649	FALSE	Stable	2.90805	6.70559e-05	1.84834	0.0256867	0.343571	0.999993
70605	chr1	75344450	75344799	FALSE	Stable	2.97842	4.7589e-05	2.25519	0.00690211	-0.265485	0.999993
70606	chr1	75360000	75360199	FALSE	other	2.85415	8.75266e-05	0.665391	0.418642	0.535604	0.999993
70607	chr1	75360350	75360999	FALSE	Stable	2.76941	0.000132704	2.26095	0.0067685	0.0694528	0.999993
70608	chr1	75375100	75375949	FALSE	Stable	3.27643	1.15701e-05	3.08462	0.000428679	0.37807	0.999993
70609	chr1	75381600	75382099	FALSE	Stable	3.19581	1.67963e-05	3.17809	0.000326904	0.261404	0.999993
70610	chr1	75382150	75382949	FALSE	Stable	3.36022	8.17543e-06	4.05797	4.35308e-05	0.200728	0.999993
70611	chr1	75388000	75388399	FALSE	Stable	2.22612	0.00183918	2.32381	0.00546916	0.0270697	0.999993
70612	chr1	75388500	75388899	FALSE	Stable	2.22473	0.0018514	1.87967	0.0233282	0.0737431	0.999993
70613	chr1	75400000	75400549	TRUE	Stable	2.01944	0.00461634	2.9752	0.000597446	0.152307	0.999993
70614	chr1	75422500	75423349	FALSE	Stable	2.98952	4.50446e-05	2.6931	0.00151606	-0.0014817	0.999993
70615	chr1	75435800	75435999	FALSE	Stable	2.88206	7.62478e-05	2.06374	0.0130377	0.363165	0.999993
70616	chr1	75436050	75436699	FALSE	Stable	3.06038	3.19749e-05	2.67002	0.00164052	0.129211	0.999993
70617	chr1	75446750	75447499	FALSE	Stable	2.24206	0.00171026	3.47162	0.000157892	0.511469	0.999993
70618	chr1	75447800	75448049	FALSE	other	2.81223	0.000107395	1.21959	0.138752	0.200486	0.999993
70619	chr1	75450450	75450949	FALSE	Stable	3.55083	3.5934e-06	2.22463	0.00765164	-0.142398	0.999993
70620	chr1	75458200	75459249	FALSE	Stable	3.54302	3.71336e-06	2.7638	0.00119028	0.284148	0.999993
70621	chr1	75477950	75478199	FALSE	Stable	2.9485	5.49193e-05	1.64993	0.0459444	0.361488	0.999993
70622	chr1	75478250	75479449	FALSE	Stable	3.80072	1.30035e-06	3.13298	0.000371474	0.258993	0.999993
70623	chr1	75479700	75479999	FALSE	Stable	2.18523	0.0022204	2.20739	0.00811374	-0.191808	0.999993
70624	chr1	75487100	75488299	FALSE	Stable	2.98866	4.52666e-05	3.06525	0.000453818	0.227246	0.999993
70625	chr1	75504850	75506999	FALSE	Stable	3.08994	2.76936e-05	3.24828	0.000270267	0.0588862	0.999993
70626	chr1	75521700	75522349	TRUE	Stable	2.32538	0.00115838	3.30441	0.000234814	-0.0451619	0.999993
70627	chr1	75545950	75546899	FALSE	Stable	3.43402	5.8747e-06	2.74382	0.00127349	0.124882	0.999993
70628	chr1	75547000	75547349	FALSE	other	3.82709	1.15807e-06	0.807627	0.326114	0.953819	0.999993
70629	chr1	75662700	75662799	FALSE	Stable	2.07887	0.0035647	3.21017	0.000300226	0.293691	0.999993
70630	chr1	75663100	75663199	FALSE	Stable	1.78356	0.0122144	1.84999	0.0255554	1.09113	0.999993
70631	chr1	75803800	75803949	FALSE	Stable	1.41666	0.0461804	2.31349	0.00566965	-0.62313	0.999993
70632	chr1	75833100	75833499	TRUE	Stable	2.6855	0.000200849	1.63115	0.0484422	0.168663	0.999993
70633	chr1	76866200	76866399	FALSE	other	-0.179852	0.80162	3.25996	0.000262346	-0.640359	0.999993
70634	chr1	76973150	76973249	FALSE	other	0.465838	0.512767	1.94011	0.0193509	-0.316707	0.999993
70635	chr1	77290150	77290349	FALSE	other	-0.215701	0.763603	2.83445	0.000940639	-1.89259	0.4718
70636	chr1	77511800	77513649	FALSE	Stable	3.77262	1.43922e-06	2.64651	0.00177496	0.239289	0.999993
70637	chr1	77513800	77515149	FALSE	Stable	2.65541	0.000233156	2.89226	0.000778304	0.258662	0.999993
70638	chr1	77515250	77516999	TRUE	Stable	3.51749	4.14083e-06	3.42881	0.000172617	0.0804313	0.999993
70639	chr1	78022100	78022199	FALSE	Stable	1.71092	0.0161619	2.32482	0.0054503	-0.702345	0.999993
70640	chr1	78188050	78188299	FALSE	Stable	2.18317	0.00224084	3.87953	6.73858e-05	-0.271368	0.999993
70641	chr1	78189200	78189999	TRUE	Stable	4.10841	4.00969e-07	2.64049	0.00181335	0.223339	0.999993
70642	chr1	78196500	78197049	FALSE	Stable	2.23008	0.00180571	2.80925	0.00102341	-0.16642	0.999993
70643	chr1	78203750	78204099	FALSE	Stable	2.9431	5.64774e-05	2.15047	0.00979395	0.164545	0.999993
70644	chr1	78215950	78216149	FALSE	Stable	2.36286	0.000971199	2.88217	0.000802506	-0.245613	0.999993
70645	chr1	78216500	78217799	FALSE	Stable	2.98518	4.60871e-05	3.34353	0.000213158	-0.0801541	0.999993
70646	chr1	78309600	78311249	FALSE	Stable	3.48426	4.74434e-06	3.31663	0.000228026	0.08029	0.999993
70647	chr1	78487900	78488799	TRUE	Stable	3.61589	2.76708e-06	3.24285	0.000274181	0.0954989	0.999993
70648	chr1	78489000	78489899	TRUE	Stable	3.16321	1.95658e-05	3.07704	0.000438785	0.0703164	0.999993
70649	chr1	78511600	78511949	FALSE	Stable	1.95835	0.00599336	2.87378	0.000823708	0.129046	0.999993
70650	chr1	78658300	78659549	FALSE	Stable	2.63095	0.000263215	3.3039	0.000235104	-0.20862	0.999993
70651	chr1	79671150	79672649	FALSE	Stable	3.57054	3.31615e-06	3.20893	0.000301076	0.222478	0.999993
70652	chr1	79760750	79762349	FALSE	Stable	3.45551	5.35586e-06	3.12117	0.000384611	0.105825	0.999993
70653	chr1	79776200	79777099	FALSE	Stable	2.85745	8.61808e-05	3.06077	0.000459806	0.00791681	0.999993
70654	chr1	79857350	79858649	FALSE	Stable	2.88758	7.42087e-05	2.88575	0.000793544	0.0430364	0.999993
70655	chr1	79858800	79859399	FALSE	Stable	4.07002	4.62137e-07	2.25558	0.00689415	0.165748	0.999993
70656	chr1	80222150	80222349	FALSE	other	2.51631	0.000463748	0.446665	0.587532	0.996368	0.999993
70657	chr1	80338150	80338349	FALSE	other	2.02133	0.0045828	0.812748	0.323105	0.753432	0.999993
70658	chr1	80338500	80340049	FALSE	Stable	2.86403	8.34894e-05	2.96088	0.000624246	0.136042	0.999993
70659	chr1	80341150	80341899	FALSE	Stable	2.48187	0.000548746	3.04683	0.000479651	-0.063103	0.999993
70660	chr1	80530200	80530399	FALSE	other	-1.56897	0.0273139	3.68368	0.000101985	-2.46649	0.0597245
70661	chr1	80757200	80757949	FALSE	Stable	3.8645	1.00071e-06	3.03076	0.000504146	0.0901388	0.999993
70662	chr1	80758050	80759099	FALSE	Stable	3.61204	2.80175e-06	2.66049	0.00169286	0.253708	0.999993
70663	chr1	81587500	81587599	FALSE	other	2.64067	0.000250949	1.03102	0.210051	0.639493	0.999993
70664	chr1	81593400	81593599	FALSE	Stable	1.55219	0.0289974	2.88593	0.00079309	-0.176173	0.999993
70665	chr1	81593850	81594399	FALSE	Stable	2.53338	0.000426288	2.64104	0.00180997	-0.278625	0.999993
70666	chr1	82112550	82112749	FALSE	other	0.160595	0.822174	3.35002	0.000209384	-0.807358	0.999993
70667	chr1	82257350	82257499	FALSE	other	2.16988	0.0023767	1.19351	0.147331	0.88793	0.999993
70668	chr1	82282900	82283799	TRUE	Stable	3.08826	2.79148e-05	2.69835	0.00149003	0.0745831	0.999993
70669	chr1	82284550	82284799	FALSE	other	3.585	3.11237e-06	1.13371	0.168503	1.37801	0.999993
70670	chr1	82284950	82285299	FALSE	other	3.54103	3.74639e-06	0.593636	0.470556	0.881751	0.999993
70671	chr1	82286350	82286849	FALSE	other	2.78912	0.000120236	1.45161	0.0784843	0.603141	0.999993
70672	chr1	82289850	82293449	TRUE	Stable	3.37412	7.64991e-06	3.20801	0.000301852	0.119411	0.999993
70673	chr1	82316000	82316449	FALSE	Stable	1.80074	0.0114181	3.09505	0.000416164	-0.22676	0.999993
70674	chr1	82316800	82317399	FALSE	Stable	3.24396	1.34332e-05	2.69494	0.0015062	0.157714	0.999993
70675	chr1	82586500	82587499	FALSE	Stable	2.63321	0.000260182	2.66764	0.00165502	0.182193	0.999993
70676	chr1	82641400	82641599	FALSE	Stable	2.90305	6.87023e-05	1.80788	0.028992	0.975136	0.999993
70677	chr1	82724500	82724849	FALSE	Stable	3.89564	9.01624e-07	2.25203	0.00697955	0.533739	0.999993
70678	chr1	82725100	82726249	FALSE	Stable	3.25092	1.29884e-05	3.47395	0.00015693	-0.0085902	0.999993
70679	chr1	82838900	82839249	TRUE	Stable	2.18735	0.00219892	3.18355	0.000322352	-0.317642	0.999993
70680	chr1	82840250	82840899	FALSE	Stable	3.59754	2.96149e-06	2.68599	0.00155355	0.105072	0.999993
70681	chr1	83037850	83038849	FALSE	Stable	2.79474	0.000116995	3.44609	0.000166167	-0.281294	0.999993
70682	chr1	83159750	83160199	FALSE	Stable	2.76346	0.000136823	2.48629	0.00311451	-0.151098	0.999993
70683	chr1	83169350	83169499	FALSE	other	1.02074	0.150611	1.61603	0.0505047	-0.683734	0.999993
70684	chr1	83407750	83408599	FALSE	Stable	3.22063	1.4934e-05	3.10244	0.000407496	-0.0527655	0.999993
70685	chr1	83877150	83877249	FALSE	other	1.84216	0.00967673	-0.0812118	0.922298	0.27022	0.999993
70686	chr1	84284050	84285049	FALSE	Stable	3.2709	1.18513e-05	3.1366	0.000368168	-0.0387592	0.999993
70687	chr1	84585450	84585599	FALSE	other	0.506784	0.476531	3.69705	9.85964e-05	-0.808202	0.999993
70688	chr1	84695250	84696299	FALSE	Stable	3.68942	2.04696e-06	3.07421	0.000442186	-0.0754542	0.999993
70689	chr1	84837850	84838599	FALSE	Stable	3.42371	6.15463e-06	3.84091	7.36489e-05	0.149432	0.999993
70690	chr1	84839450	84839749	TRUE	other	2.70833	0.000179403	-0.444586	0.589275	0.933065	0.999993
70691	chr1	84840150	84840999	FALSE	Stable	4.00509	5.77527e-07	2.76221	0.00119636	0.153533	0.999993
70692	chr1	84934250	84935349	FALSE	Stable	3.33689	9.02809e-06	3.68184	0.000102278	0.0813891	0.999993
70693	chr1	85736200	85736599	FALSE	other	2.18646	0.00220762	1.60648	0.0518461	0.427172	0.999993
70694	chr1	85793950	85795199	FALSE	Stable	2.83003	9.84454e-05	3.33842	0.000216164	0.106158	0.999993
70695	chr1	85894000	85896149	TRUE	Stable	3.4222	6.19787e-06	2.86214	0.000856886	0.07797	0.999993
70696	chr1	85896900	85897099	FALSE	other	0.317205	0.656596	2.93504	0.000677478	-0.22788	0.999993
70697	chr1	86018050	86018899	FALSE	Stable	3.26537	1.21651e-05	2.8347	0.000940639	0.191565	0.999993
70698	chr1	86045600	86046949	FALSE	Stable	3.7024	1.94553e-06	3.50944	0.000144435	0.141192	0.999993
70699	chr1	86059150	86059649	FALSE	Stable	2.16394	0.00244063	2.96407	0.000617824	0.0234116	0.999993
70700	chr1	86064900	86065849	FALSE	Stable	2.82733	9.97566e-05	2.6816	0.00157701	0.0689858	0.999993
70701	chr1	86154000	86154599	FALSE	Stable	3.43065	5.9669e-06	2.13741	0.0102338	0.416807	0.999993
70702	chr1	86154750	86155049	FALSE	Stable	2.9207	6.30056e-05	1.86817	0.0241778	0.318166	0.999993
70703	chr1	86155350	86155699	FALSE	other	2.99174	4.45585e-05	0.796951	0.332708	0.633333	0.999993
70704	chr1	86303050	86304049	FALSE	Stable	2.95469	5.33049e-05	2.82875	0.00095881	0.0481827	0.999993
70705	chr1	86358050	86358849	FALSE	Stable	3.12225	2.38171e-05	3.73284	9.10571e-05	-0.0222497	0.999993
70706	chr1	86359800	86361099	FALSE	Stable	3.14878	2.10181e-05	3.40376	0.000184593	-0.00764611	0.999993
70707	chr1	86434100	86434349	FALSE	Stable	2.86678	8.23332e-05	2.61628	0.00197329	-0.156651	0.999993
70708	chr1	86434600	86435049	FALSE	Stable	3.04035	3.51884e-05	2.95535	0.000635152	0.3966	0.999993
70709	chr1	86435100	86435299	FALSE	Stable	2.47455	0.00056838	2.41671	0.00396366	0.570134	0.999993
70710	chr1	86440750	86443449	TRUE	Stable	3.59311	3.00703e-06	3.15058	0.000353027	0.0964951	0.999993
70711	chr1	86472100	86472349	FALSE	Stable	2.27148	0.00149174	3.6313	0.000111483	0.0520926	0.999993
70712	chr1	86486850	86487299	FALSE	Stable	2.47641	0.000563303	2.23258	0.00745052	0.187951	0.999993
70713	chr1	86487800	86488699	FALSE	Stable	3.71208	1.85755e-06	3.01245	0.000533636	-0.0246615	0.999993
70714	chr1	86502350	86502499	FALSE	other	1.06261	0.134556	2.32044	0.00553198	0.154083	0.999993
70715	chr1	86503150	86504099	TRUE	Stable	2.36386	0.000966728	3.2457	0.000271782	-0.162699	0.999993
70716	chr1	86504450	86504999	TRUE	Stable	3.06733	3.08989e-05	2.48699	0.00310725	0.227188	0.999993
70717	chr1	86505100	86505399	FALSE	other	3.06082	3.19222e-05	0.893799	0.277194	0.518329	0.999993
70718	chr1	86525050	86525199	FALSE	Stable	2.22996	0.00180626	4.30623	2.01978e-05	0.876156	0.999993
70719	chr1	86525350	86526299	TRUE	Stable	3.44207	5.67291e-06	2.75301	0.00123484	0.189446	0.999993
70720	chr1	86528650	86529849	FALSE	Stable	2.91689	6.41582e-05	3.18097	0.000324349	-0.0187025	0.999993
70721	chr1	86581700	86582399	FALSE	Stable	2.73617	0.000156517	2.66014	0.00169507	0.348944	0.999993
70722	chr1	86582550	86582949	FALSE	other	2.35492	0.00100861	1.34992	0.101412	0.739084	0.999993
70723	chr1	86583000	86583399	FALSE	Stable	2.95712	5.26671e-05	2.69218	0.00152011	-0.0653272	0.999993
70724	chr1	86586700	86587949	FALSE	Stable	2.48318	0.0005451	2.97334	0.000600315	-0.13836	0.999993
70725	chr1	86669750	86670999	FALSE	Stable	3.17111	1.88841e-05	3.01728	0.000524986	0.046119	0.999993
70726	chr1	86703150	86704049	TRUE	Stable	3.24462	1.33941e-05	2.76303	0.00119335	0.24248	0.999993
70727	chr1	86704150	86704499	TRUE	Stable	2.40985	0.000776016	2.87855	0.000810651	-0.111242	0.999993
70728	chr1	86704550	86704749	FALSE	Stable	1.97635	0.00555735	2.66119	0.00168903	0.556301	0.999993
70729	chr1	87154300	87154649	FALSE	Stable	1.91852	0.00707466	2.34079	0.00515865	-0.110679	0.999993
70730	chr1	87155800	87156299	FALSE	Stable	2.16489	0.00243158	3.39821	0.00018674	0.0879021	0.999993
70731	chr1	87186350	87186599	FALSE	Stable	1.80958	0.0110199	1.7189	0.0377616	-0.537408	0.999993
70732	chr1	87186850	87187249	FALSE	Stable	3.36341	8.05709e-06	3.72832	9.2097e-05	0.14738	0.999993
70733	chr1	87213200	87213849	TRUE	Stable	2.5934	0.000317697	2.36415	0.0047627	0.131127	0.999993
70734	chr1	87213950	87214299	TRUE	Stable	2.62463	0.000271554	2.46152	0.00339616	0.13195	0.999993
70735	chr1	87214550	87215399	TRUE	Stable	2.80405	0.000111845	3.19099	0.000315029	0.256305	0.999993
70736	chr1	87264000	87265049	FALSE	Stable	3.01082	4.0512e-05	3.57475	0.000125097	0.212881	0.999993
70737	chr1	87270300	87270449	FALSE	other	2.72732	0.000163375	-0.0364454	0.965238	1.21874	0.999993
70738	chr1	87270750	87271149	FALSE	other	2.70291	0.000184206	1.61438	0.0507318	-0.0515063	0.999993
70739	chr1	87327250	87328299	FALSE	Stable	3.14448	2.14589e-05	3.06392	0.0004553	-0.0298681	0.999993
70740	chr1	87475250	87475699	FALSE	Stable	2.51305	0.000471194	2.17863	0.00892516	0.0685087	0.999993
70741	chr1	87509650	87510949	FALSE	Stable	3.40158	6.76801e-06	4.31534	1.99004e-05	0.0112001	0.999993
70742	chr1	87755500	87755749	FALSE	Stable	3.79173	1.34437e-06	1.69525	0.04042	0.443332	0.999993
70743	chr1	87755800	87755999	FALSE	Stable	1.57016	0.0271961	3.14681	0.000357301	0.239367	0.999993
70744	chr1	87756250	87757199	FALSE	Stable	3.08588	2.82331e-05	3.32856	0.000221295	-0.115487	0.999993
70745	chr1	87852800	87853199	FALSE	Stable	2.77401	0.000129768	2.69244	0.00151882	0.405914	0.999993
70746	chr1	87853350	87854549	FALSE	Stable	3.9602	6.87002e-07	2.9589	0.000628782	0.19364	0.999993
70747	chr1	88007800	88008449	TRUE	Stable	2.77565	0.000128705	2.9084	0.000739038	0.015098	0.999993
70748	chr1	88008550	88008899	TRUE	Stable	2.11595	0.00302595	1.98589	0.0167388	0.326685	0.999993
70749	chr1	88205150	88205749	FALSE	Stable	3.07676	2.95002e-05	2.56796	0.00233524	0.242894	0.999993
70750	chr1	88205800	88205999	FALSE	Stable	2.17023	0.00237376	2.1817	0.00883434	0.0967136	0.999993
70751	chr1	88276100	88277499	FALSE	Stable	3.05003	3.35848e-05	2.70418	0.0014612	0.0687362	0.999993
70752	chr1	88277900	88278049	FALSE	Stable	2.03438	0.00432796	1.65281	0.0455782	-0.555503	0.999993
70753	chr1	88698900	88699049	FALSE	Stable	2.68785	0.000198672	2.53297	0.00264083	0.0664376	0.999993
70754	chr1	88699500	88700749	FALSE	Stable	3.46011	5.25034e-06	2.46564	0.00334871	-0.0357004	0.999993
70755	chr1	88700800	88702649	FALSE	Stable	3.64663	2.45679e-06	2.92032	0.000709968	0.209131	0.999993
70756	chr1	89034000	89034099	FALSE	other	-1.56897	0.0273139	1.24365	0.131074	-1.57149	0.999993
70757	chr1	89069700	89069899	FALSE	Stable	2.0175	0.00465571	2.43661	0.00370003	-0.222477	0.999993
70758	chr1	89070500	89072549	TRUE	Stable	3.17811	1.82772e-05	3.21188	0.000298642	0.117138	0.999993
70759	chr1	89092700	89092849	FALSE	Stable	2.3158	0.00121145	2.09873	0.0116406	0.0970378	0.999993
70760	chr1	89453900	89454649	TRUE	Stable	3.23542	1.39855e-05	3.13966	0.000364856	-0.207443	0.999993
70761	chr1	89454750	89456599	TRUE	Stable	3.28196	1.12901e-05	3.49798	0.000147929	0.155546	0.999993
70762	chr1	89566800	89566899	FALSE	Stable	1.4037	0.0481586	1.80032	0.0296607	-0.223897	0.999993
70763	chr1	89580250	89581849	FALSE	Stable	4.17724	3.02503e-07	4.41921	1.38277e-05	0.142693	0.999993
70764	chr1	89750700	89750899	FALSE	other	2.69971	0.000187096	1.59298	0.0537975	-0.021895	0.999993
70765	chr1	89750950	89751099	FALSE	Stable	1.49583	0.0353158	2.11154	0.0111555	0.0275114	0.999993
70766	chr1	89922450	89922649	FALSE	other	1.32125	0.0628444	2.95315	0.000639003	-0.485404	0.999993
70767	chr1	89922800	89923349	FALSE	Stable	3.22761	1.44536e-05	2.45524	0.00347306	0.442102	0.999993
70768	chr1	89927000	89927749	FALSE	Stable	2.65825	0.000229934	2.85279	0.000884863	0.150031	0.999993
70769	chr1	89928900	89929799	FALSE	other	2.54542	0.000401707	1.12286	0.172565	0.994526	0.999993
70770	chr1	89929950	89931949	FALSE	Stable	3.48893	4.6513e-06	3.10755	0.000401444	0.197811	0.999993
70771	chr1	89932250	89932399	FALSE	other	1.67462	0.0185379	0.901645	0.27296	0.242968	0.999993
70772	chr1	89941700	89942899	FALSE	Stable	2.93918	5.75729e-05	2.62672	0.00190276	0.0268553	0.999993
70773	chr1	89967950	89968999	FALSE	Stable	3.6085	2.83863e-06	3.70554	9.81183e-05	-0.0353064	0.999993
70774	chr1	89992100	89992599	FALSE	Stable	3.38936	7.12126e-06	2.69102	0.00152633	-0.430283	0.999993
70775	chr1	90153150	90153849	FALSE	Stable	2.27549	0.00146487	2.35995	0.00483085	0.101792	0.999993
70776	chr1	90202450	90202749	FALSE	Stable	2.44796	0.000646244	1.8577	0.024962	0.0720517	0.999993
70777	chr1	90203450	90203799	FALSE	Stable	1.88383	0.00816615	2.39343	0.00429782	-0.0920415	0.999993
70778	chr1	90204000	90204199	FALSE	other	1.20841	0.0887731	2.47072	0.00329052	-0.437066	0.999993
70779	chr1	90204700	90205049	FALSE	Stable	3.72189	1.78511e-06	2.59625	0.00211676	-0.205175	0.999993
70780	chr1	90205250	90205699	FALSE	Stable	2.90775	6.7133e-05	2.5374	0.00260104	-0.364009	0.999993
70781	chr1	90602750	90603399	FALSE	Stable	2.47906	0.000556329	2.42157	0.00389804	-0.00801103	0.999993
70782	chr1	90603650	90604349	FALSE	Stable	3.69223	2.02098e-06	3.14494	0.000358944	-0.145119	0.999993
70783	chr1	90744100	90744549	FALSE	Stable	2.75048	0.000145555	3.10005	0.000410309	-0.19543	0.999993
70784	chr1	90843450	90843649	FALSE	other	2.33183	0.00112337	0.847003	0.303148	0.356201	0.999993
70785	chr1	90844100	90844299	FALSE	other	2.81736	0.000104814	1.08179	0.188548	0.0824119	0.999993
70786	chr1	90914600	90915449	FALSE	Stable	2.4034	0.000800292	2.5333	0.00263884	0.0563587	0.999993
70787	chr1	90998300	90999899	FALSE	Stable	3.36537	7.9901e-06	3.48302	0.000153385	0.0817908	0.999993
70788	chr1	91017200	91017399	FALSE	Stable	1.53974	0.0302885	2.03597	0.0142631	0.501209	0.999993
70789	chr1	91052500	91054199	FALSE	Stable	3.71109	1.86775e-06	3.04793	0.000478028	0.212553	0.999993
70790	chr1	91054500	91054699	FALSE	other	3.23539	1.39855e-05	1.32603	0.107561	0.939199	0.999993
70791	chr1	91179800	91180299	FALSE	Stable	2.79909	0.000114525	2.51807	0.00278282	0.110056	0.999993
70792	chr1	91249500	91249999	TRUE	Stable	2.88382	7.56243e-05	3.26773	0.000257202	-0.140222	0.999993
70793	chr1	91250500	91251499	TRUE	Stable	3.16728	1.92097e-05	3.72274	9.34511e-05	0.0187212	0.999993
70794	chr1	91298200	91298699	FALSE	Stable	1.85818	0.00907149	2.55193	0.00246882	0.0688617	0.999993
70795	chr1	91298800	91299099	FALSE	Stable	2.80262	0.000112599	3.53204	0.00013761	0.119151	0.999993
70796	chr1	91344900	91345549	FALSE	Stable	1.72108	0.0155548	2.63593	0.0018424	-0.247824	0.999993
70797	chr1	91366150	91366949	FALSE	Stable	3.21277	1.54775e-05	2.81575	0.00100225	0.0991268	0.999993
70798	chr1	91397550	91398599	TRUE	Stable	2.97935	4.73886e-05	2.95046	0.000644073	0.30709	0.999993
70799	chr1	91398750	91399449	TRUE	Stable	2.97025	4.94356e-05	2.47143	0.00328153	0.531582	0.999993
70800	chr1	91412200	91413249	FALSE	Stable	3.38335	7.32093e-06	3.26106	0.000261754	-0.0106027	0.999993
70801	chr1	91413450	91414849	TRUE	Stable	2.86879	8.14991e-05	3.00355	0.000548058	0.0546901	0.999993
70802	chr1	91458450	91459299	FALSE	Stable	2.74799	0.000147408	2.74312	0.0012769	0.207659	0.999993
70803	chr1	91459550	91460299	FALSE	Stable	2.21018	0.00198052	3.46048	0.000161694	0.106254	0.999993
70804	chr1	91494250	91494399	FALSE	Stable	1.79532	0.0116685	2.00194	0.0159109	0.0670778	0.999993
70805	chr1	91494600	91495649	FALSE	Stable	3.46525	5.14123e-06	3.14156	0.000362924	0.0867044	0.999993
70806	chr1	91539800	91540449	FALSE	Stable	3.22686	1.45055e-05	3.78423	8.17747e-05	-0.0206964	0.999993
70807	chr1	91540700	91541449	FALSE	Stable	3.24198	1.35542e-05	2.70256	0.00146859	0.107185	0.999993
70808	chr1	91758850	91758999	FALSE	other	2.18971	0.00217551	0.0327106	0.968779	1.44086	0.999993
70809	chr1	91770550	91771299	TRUE	Stable	3.24391	1.34348e-05	2.1845	0.00874788	0.182988	0.999993
70810	chr1	91799650	91799899	FALSE	Stable	2.6592	0.000228891	2.35077	0.00498692	0.735494	0.999993
70811	chr1	91800100	91801249	FALSE	Stable	3.00905	4.08135e-05	2.64212	0.00180337	0.31125	0.999993
70812	chr1	91801350	91803599	FALSE	Stable	3.54093	3.74697e-06	3.12579	0.000379415	0.319779	0.999993
70813	chr1	91963200	91963399	FALSE	other	2.09255	0.00336143	1.16358	0.157681	0.47382	0.999993
70814	chr1	92178500	92179949	FALSE	Stable	3.86682	9.9276e-07	3.01218	0.000533985	0.0682433	0.999993
70815	chr1	92180700	92181499	TRUE	Stable	2.83177	9.75378e-05	3.22613	0.000286164	0.0907818	0.999993
70816	chr1	92371900	92372299	TRUE	other	3.22577	1.45791e-05	0.474834	0.564282	0.771233	0.999993
70817	chr1	92397700	92397949	TRUE	Stable	1.45626	0.040406	3.19898	0.000308544	0.239556	0.999993
70818	chr1	92472950	92473649	FALSE	Stable	3.28898	1.09491e-05	3.51043	0.000144264	-0.0102067	0.999993
70819	chr1	92473850	92474499	FALSE	Stable	3.06749	3.08805e-05	3.06035	0.000460491	0.0125643	0.999993
70820	chr1	92641100	92642699	FALSE	Stable	2.84614	9.10404e-05	2.45388	0.00348958	-0.159523	0.999993
70821	chr1	92790350	92790499	FALSE	other	3.00528	4.15835e-05	1.03855	0.206807	0.0926389	0.999993
70822	chr1	92790750	92790999	TRUE	Stable	2.1092	0.00311953	2.06257	0.0130904	0.335871	0.999993
70823	chr1	92791450	92791799	TRUE	Stable	2.48621	0.000536955	2.26637	0.00664645	0.250207	0.999993
70824	chr1	92830750	92831199	TRUE	Stable	2.68152	0.00020508	2.58603	0.00219255	-0.0741572	0.999993
70825	chr1	92831750	92833449	TRUE	Stable	3.3186	9.71669e-06	3.2262	0.000286164	0.160011	0.999993
70826	chr1	92902750	92902899	FALSE	Stable	2.45327	0.000629457	2.08565	0.0121399	-0.0875233	0.999993
70827	chr1	92906850	92907949	FALSE	Stable	3.05415	3.29004e-05	2.21736	0.00784579	0.189107	0.999993
70828	chr1	92910050	92911749	FALSE	Stable	3.34701	8.65622e-06	2.98168	0.000585289	0.244176	0.999993
70829	chr1	92933700	92934499	TRUE	Stable	2.6415	0.000249999	2.72268	0.00136961	0.258301	0.999993
70830	chr1	92934700	92936049	TRUE	Stable	2.93579	5.84648e-05	3.45622	0.000163189	0.15251	0.999993
70831	chr1	93100450	93100949	FALSE	Stable	2.238	0.00174227	2.77628	0.00114007	-0.274804	0.999993
70832	chr1	93101100	93102199	FALSE	Stable	3.13567	2.23514e-05	3.75256	8.73926e-05	-0.0464715	0.999993
70833	chr1	93115350	93115549	FALSE	Stable	2.9317	5.95608e-05	1.97343	0.0174114	0.428266	0.999993
70834	chr1	93176000	93176299	FALSE	other	3.27557	1.16122e-05	1.53081	0.0636397	0.634876	0.999993
70835	chr1	93176350	93176699	TRUE	Stable	2.27194	0.00148863	2.68057	0.00158288	0.00893373	0.999993
70836	chr1	93177000	93177249	TRUE	Stable	2.45419	0.000626606	2.09575	0.0117527	-0.206847	0.999993
70837	chr1	93235700	93236799	FALSE	Stable	3.25192	1.29527e-05	3.70853	9.73829e-05	0.116671	0.999993
70838	chr1	93305050	93305899	FALSE	Stable	3.87542	9.70282e-07	2.58718	0.00218426	0.182441	0.999993
70839	chr1	93305950	93306349	FALSE	Stable	2.44241	0.0006643	2.70668	0.00144905	-0.30885	0.999993
70840	chr1	93342150	93342749	TRUE	Stable	3.13231	2.27207e-05	2.9988	0.000555887	0.0776368	0.999993
70841	chr1	93342800	93343549	TRUE	Stable	3.3416	8.85575e-06	3.07207	0.000445038	0.356546	0.999993
70842	chr1	93343700	93344649	TRUE	Stable	3.05366	3.29804e-05	2.55034	0.00248383	0.148924	0.999993
70843	chr1	93444600	93445299	TRUE	Stable	3.97215	6.73122e-07	2.50338	0.00293427	0.570532	0.999993
70844	chr1	93445650	93445949	TRUE	Stable	2.94205	5.67611e-05	2.27578	0.00643891	0.317134	0.999993
70845	chr1	93477550	93478199	TRUE	Stable	2.63736	0.000255004	2.66821	0.00165138	0.0963477	0.999993
70846	chr1	93479150	93480099	TRUE	Stable	2.78744	0.000121208	2.35774	0.004868	0.0135743	0.999993
70847	chr1	93511250	93511849	TRUE	Stable	2.85544	8.70349e-05	2.55647	0.00243203	0.125056	0.999993
70848	chr1	93512150	93513149	TRUE	Stable	3.27082	1.18547e-05	3.46863	0.000159513	0.146765	0.999993
70849	chr1	93513200	93513349	FALSE	other	1.33841	0.0595457	1.4992	0.0692483	0.266286	0.999993
70850	chr1	93634350	93635649	TRUE	Stable	3.36386	8.04693e-06	2.70648	0.00144988	-0.0412891	0.999993
70851	chr1	93636200	93636399	FALSE	Stable	1.98369	0.00538633	1.98639	0.0167101	0.0276618	0.999993
70852	chr1	93668850	93669049	FALSE	other	1.99257	0.00518489	0.587663	0.475147	0.251706	0.999993
70853	chr1	93669100	93669249	FALSE	Stable	1.97862	0.00550268	2.53774	0.00259762	0.0235732	0.999993
70854	chr1	93685200	93686699	FALSE	Stable	3.60921	2.83848e-06	3.37127	0.000198516	0.0567265	0.999993
70855	chr1	93753500	93754699	TRUE	Stable	2.7756	0.000128735	3.29338	0.000240929	-0.00447921	0.999993
70856	chr1	93755200	93755599	FALSE	Stable	2.29101	0.00136199	3.05889	0.000462445	0.194847	0.999993
70857	chr1	93755800	93756049	FALSE	Stable	1.75928	0.0134365	4.02833	4.67446e-05	-0.141331	0.999993
70858	chr1	93800800	93800949	FALSE	other	2.83789	9.46908e-05	1.38721	0.0924357	0.0585239	0.999993
70859	chr1	93801000	93801899	FALSE	Stable	2.90056	6.95517e-05	3.30376	0.000235138	-0.188758	0.999993
70860	chr1	93802150	93802799	FALSE	Stable	3.30171	1.03737e-05	2.59789	0.00210433	0.0114076	0.999993
70861	chr1	93803200	93803799	FALSE	Stable	3.94291	7.37811e-07	2.65414	0.00173057	0.297684	0.999993
70862	chr1	93804050	93804999	FALSE	Stable	3.34418	8.75456e-06	2.16227	0.00942139	0.309036	0.999993
70863	chr1	93824750	93826349	FALSE	Stable	3.11845	2.4262e-05	3.37164	0.000198338	0.0427433	0.999993
70864	chr1	93880050	93880149	FALSE	other	2.43072	0.000702989	1.28113	0.119919	0.486274	0.999993
70865	chr1	93947300	93947399	FALSE	other	3.03795	3.5602e-05	0.985644	0.230782	0.507283	0.999993
70866	chr1	94035050	94035799	FALSE	Stable	3.18278	1.78394e-05	3.48968	0.000150458	-0.159057	0.999993
70867	chr1	94081100	94081249	FALSE	other	-1.08618	0.126185	3.22993	0.000283721	-1.52994	0.999993
70868	chr1	94601050	94601199	FALSE	Stable	1.61157	0.0234085	2.1913	0.0085559	-1.54988	0.999993
70869	chr1	95139200	95139299	FALSE	other	0.514288	0.470274	2.58618	0.00219124	-1.19018	0.999993
70870	chr1	95313850	95314799	FALSE	Stable	3.22372	1.47145e-05	3.59876	0.000119135	-0.00121783	0.999993
70871	chr1	95665450	95665699	FALSE	Stable	1.89015	0.00796205	2.76133	0.0011993	-0.546833	0.999993
70872	chr1	95666000	95666749	FALSE	Stable	2.99161	4.45777e-05	2.9347	0.000678101	-0.486442	0.999993
70873	chr1	95667050	95668449	FALSE	Stable	3.391	7.07183e-06	2.80543	0.0010355	0.0978568	0.999993
70874	chr1	96871700	96872549	FALSE	Stable	2.80979	0.000108615	3.46326	0.000161084	-0.0792943	0.999993
70875	chr1	97660150	97662499	FALSE	Stable	3.79937	1.30681e-06	3.12679	0.00037833	0.216655	0.999993
70876	chr1	97768550	97769799	FALSE	Stable	3.1927	1.70013e-05	3.13063	0.000373981	0.0854821	0.999993
70877	chr1	97770300	97771049	FALSE	Stable	3.22905	1.43713e-05	3.5444	0.00013433	0.245836	0.999993
70878	chr1	97975150	97975249	FALSE	other	1.66094	0.0195064	-0.234943	0.776323	0.242733	0.999993
70879	chr1	97976350	97977549	FALSE	Stable	3.46431	5.16431e-06	2.64348	0.00179426	0.193252	0.999993
70880	chr1	98076300	98076399	FALSE	other	0.869521	0.220836	2.28104	0.00633196	0.0134701	0.999993
70881	chr1	98094300	98096149	FALSE	Stable	2.7727	0.000130521	3.24468	0.000272565	0.0342573	0.999993
70882	chr1	100343650	100343749	FALSE	other	0.784767	0.269292	1.1905	0.148331	0.049106	0.999993
70883	chr1	104768100	104769699	FALSE	Stable	4.01829	5.49435e-07	3.06194	0.000458272	-0.0261616	0.999993
70884	chr1	104994000	104994249	FALSE	other	2.06839	0.00373252	1.22717	0.136298	0.388955	0.999993
70885	chr1	105355200	105357049	FALSE	Stable	3.51258	4.21295e-06	3.22257	0.000289102	-0.0472259	0.999993
70886	chr1	105662900	105663449	FALSE	Stable	2.61267	0.000288149	2.83963	0.000926443	-0.102196	0.999993
70887	chr1	105664200	105665099	FALSE	Stable	3.38436	7.28874e-06	2.98712	0.000576804	0.290519	0.999993
70888	chr1	105780300	105781149	FALSE	Stable	3.13643	2.2265e-05	3.55476	0.000130957	-0.373395	0.999993
70889	chr1	105843350	105843899	FALSE	Stable	2.09792	0.00328038	3.47515	0.000156441	-0.230739	0.999993
70890	chr1	105880950	105881099	FALSE	Stable	1.94816	0.00625355	1.77836	0.0316792	0.596865	0.999993
70891	chr1	105881250	105881399	FALSE	other	1.33039	0.0610631	1.74669	0.034787	-0.552576	0.999993
70892	chr1	105989550	105990299	TRUE	Stable	3.73438	1.69356e-06	2.8595	0.000864455	0.157925	0.999993
70893	chr1	105990450	105992649	TRUE	Stable	3.39975	6.81623e-06	3.73277	9.10571e-05	0.193769	0.999993
70894	chr1	105993050	105993249	FALSE	other	1.3538	0.0567193	2.59291	0.00214152	-0.812045	0.999993
70895	chr1	105993350	105994199	FALSE	Stable	3.25521	1.27489e-05	2.78307	0.00111592	0.145146	0.999993
70896	chr1	105994600	105994899	FALSE	other	0.96545	0.173908	2.73838	0.00129768	-0.935895	0.999993
70897	chr1	106170900	106171199	FALSE	Stable	1.47777	0.0375645	2.48861	0.00308908	-0.593285	0.999993
70898	chr1	106172000	106173849	FALSE	Stable	3.10256	2.61393e-05	3.18688	0.000319403	0.0218941	0.999993
70899	chr1	106712400	106714949	TRUE	Stable	3.22694	1.45015e-05	3.81856	7.72022e-05	0.117624	0.999993
70900	chr1	106758550	106759699	TRUE	Stable	3.71564	1.83804e-06	3.39808	0.000186758	-0.0368325	0.999993
70901	chr1	106759950	106760149	TRUE	other	2.65648	0.000232014	1.42955	0.0830392	-0.0707736	0.999993
70902	chr1	106760300	106760449	TRUE	other	1.84489	0.0095705	1.48111	0.0726455	0.217628	0.999993
70903	chr1	106795500	106796099	FALSE	Stable	3.32099	9.61622e-06	3.04589	0.00048078	-0.0551616	0.999993
70904	chr1	106796250	106796399	TRUE	Stable	1.59189	0.025146	2.35072	0.00498692	-0.176139	0.999993
70905	chr1	106796800	106797299	TRUE	Stable	2.8488	8.98671e-05	3.64441	0.000109802	0.0320123	0.999993
70906	chr1	109108200	109108349	FALSE	Stable	2.2674	0.00151949	1.79613	0.0300318	1.35298	0.999993
70907	chr1	109981750	109983449	FALSE	Stable	3.14294	2.1603e-05	3.38866	0.000190933	0.0680968	0.999993
70908	chr1	111754350	111754799	FALSE	Stable	2.55458	0.000384029	2.56712	0.00234037	0.554089	0.999993
70909	chr1	111861750	111861999	FALSE	Stable	1.59855	0.0245445	3.03919	0.000490351	-0.0156561	0.999993
70910	chr1	111863550	111864899	FALSE	Stable	3.44809	5.52964e-06	2.73785	0.00130029	-0.0489227	0.999993
70911	chr1	111916050	111916249	FALSE	other	0.157615	0.825427	3.29058	0.000242669	-0.750906	0.999993
70912	chr1	112416350	112416949	FALSE	Stable	2.62728	0.000268061	3.15016	0.000353331	-0.316743	0.999993
70913	chr1	112855350	112855499	FALSE	other	2.93879	5.76432e-05	1.35298	0.100643	0.615656	0.999993
70914	chr1	115484700	115484849	FALSE	other	1.13353	0.110412	2.37986	0.00450858	-1.33477	0.999993
70915	chr1	118310000	118310099	FALSE	other	1.3719	0.0534511	3.66446	0.000106307	-0.473836	0.999993
70916	chr1	118310200	118310949	TRUE	Stable	3.48493	4.72993e-06	2.54319	0.00254866	0.224792	0.999993
70917	chr1	118311700	118311849	FALSE	other	0.643001	0.365601	2.57681	0.00226494	-0.521902	0.999993
70918	chr1	118322000	118323099	FALSE	Stable	3.42813	6.02841e-06	3.40853	0.00018239	-0.0871267	0.999993
70919	chr1	118388000	118388299	FALSE	Stable	2.22386	0.00185909	1.87677	0.0235369	-0.196257	0.999993
70920	chr1	118388400	118389249	TRUE	Stable	2.97572	4.82139e-05	2.5754	0.00227638	-0.0504502	0.999993
70921	chr1	118389650	118389849	FALSE	Stable	2.93126	5.96663e-05	2.09361	0.0118321	0.382504	0.999993
70922	chr1	118390000	118390699	FALSE	Stable	2.77087	0.000131725	3.52041	0.000141637	-0.339675	0.999993
70923	chr1	118459000	118459899	FALSE	Stable	2.66181	0.000225905	2.91398	0.000725445	-0.0584399	0.999993
70924	chr1	118627750	118628699	FALSE	Stable	2.74273	0.000151353	3.52041	0.000141637	0.0841928	0.999993
70925	chr1	118981900	118982049	FALSE	other	2.64609	0.000244222	1.42083	0.0848884	0.509118	0.999993
70926	chr1	118982200	118982349	FALSE	Stable	2.13286	0.00280727	2.06116	0.0131513	0.179889	0.999993
70927	chr1	118982800	118983199	TRUE	other	1.33816	0.0595944	3.19972	0.000308401	-0.171945	0.999993
70928	chr1	119047550	119048199	FALSE	Stable	3.22129	1.48913e-05	3.20712	0.000302695	0.257849	0.999993
70929	chr1	119048750	119049349	FALSE	Stable	2.21108	0.00197207	3.08422	0.000428983	-0.311952	0.999993
70930	chr1	119049400	119049599	FALSE	other	0.409033	0.565515	3.23968	0.000276542	-0.699301	0.999993
70931	chr1	119049900	119050049	FALSE	other	2.19316	0.00214194	0.141349	0.864775	0.923181	0.999993
70932	chr1	119050550	119051049	FALSE	other	2.6624	0.000225247	1.58603	0.0548223	0.327203	0.999993
70933	chr1	119051250	119053449	TRUE	Stable	3.5218	4.05499e-06	3.1886	0.000317403	0.150988	0.999993
70934	chr1	119053650	119054499	TRUE	Stable	2.99902	4.29548e-05	3.26789	0.000257202	0.251231	0.999993
70935	chr1	119054700	119054899	FALSE	other	2.30232	0.00129141	1.01835	0.215664	0.398287	0.999993
70936	chr1	119421250	119422699	FALSE	Stable	3.66009	2.32453e-06	3.43032	0.000171971	0.00390202	0.999993
70937	chr1	119456750	119457449	FALSE	Stable	3.19644	1.67412e-05	2.60641	0.0020425	0.0718183	0.999993
70938	chr1	119503850	119504699	FALSE	Stable	3.07548	2.96892e-05	2.7461	0.00126425	0.343464	0.999993
70939	chr1	119505050	119505349	FALSE	Stable	2.93882	5.76432e-05	2.01361	0.0153239	0.181614	0.999993
70940	chr1	119525400	119526049	FALSE	Stable	3.47648	4.90992e-06	2.41948	0.00392702	0.0659042	0.999993
70941	chr1	119526250	119526799	FALSE	Stable	2.34968	0.00103247	3.02982	0.000505739	-0.0519505	0.999993
70942	chr1	119647800	119648999	TRUE	Stable	3.08778	2.79748e-05	3.2765	0.000250938	-0.0472205	0.999993
70943	chr1	119835650	119837199	FALSE	Stable	3.13509	2.24229e-05	2.97489	0.000597946	-0.0194694	0.999993
70944	chr1	119837750	119838099	FALSE	Stable	2.63328	0.00026012	2.64933	0.00175892	-0.177241	0.999993
70945	chr1	119869300	119869449	FALSE	other	1.03387	0.145448	3.58076	0.000123245	-1.1219	0.999993
70946	chr1	119912550	119913099	FALSE	Stable	2.47083	0.000578969	3.33135	0.000220201	-0.0382613	0.999993
70947	chr1	119913250	119913549	FALSE	Stable	2.79218	0.000118512	1.97356	0.0174089	0.337031	0.999993
70948	chr1	119996850	119997749	FALSE	Stable	2.62804	0.000267051	2.98023	0.000588185	-0.462625	0.999993
70949	chr1	120007050	120007899	FALSE	Stable	2.67243	0.0002144	3.05807	0.000463384	0.0198436	0.999993
70950	chr1	120072850	120074249	FALSE	Stable	3.0045	4.17362e-05	3.78417	8.17747e-05	0.0726185	0.999993
70951	chr1	120074500	120074649	FALSE	other	0.385555	0.588356	3.70169	9.83448e-05	-0.529967	0.999993
70952	chr1	120120050	120121049	FALSE	Stable	2.94526	5.59049e-05	2.80991	0.00102094	0.00427814	0.999993
70953	chr1	120121350	120122199	FALSE	Stable	3.49069	4.61829e-06	3.83221	7.44917e-05	-0.0978356	0.999993
70954	chr1	120259100	120259199	FALSE	other	1.97274	0.00563945	1.53481	0.0629648	0.892761	0.999993
70955	chr1	120264500	120265749	FALSE	Stable	3.4564	5.33574e-06	2.97617	0.00059566	0.204471	0.999993
70956	chr1	120340700	120340899	FALSE	Stable	2.19811	0.00209459	3.47598	0.000156346	-0.120311	0.999993
70957	chr1	120341150	120341349	FALSE	other	2.72839	0.000162569	0.487744	0.553721	0.529612	0.999993
70958	chr1	120342350	120342499	FALSE	other	2.31822	0.0011983	1.26269	0.125348	0.0668217	0.999993
70959	chr1	120596600	120596999	FALSE	Stable	2.91009	6.64399e-05	2.1157	0.0110018	-0.091299	0.999993
70960	chr1	120601850	120602849	TRUE	Stable	3.25883	1.25308e-05	3.19781	0.000309612	-0.367246	0.999993
70961	chr1	120602950	120603249	FALSE	Stable	2.64937	0.000240368	3.08972	0.000422576	0.142338	0.999993
70962	chr1	120644000	120644399	FALSE	Stable	2.02871	0.00443744	2.10933	0.0112388	-0.226784	0.999993
70963	chr1	120963950	120964299	FALSE	other	1.18615	0.0948178	2.82734	0.000963263	-0.359595	0.999993
70964	chr1	121097100	121097299	FALSE	Stable	2.11972	0.00297671	1.97343	0.0174114	0.0100156	0.999993
70965	chr1	121097450	121097599	FALSE	Stable	1.95197	0.00615357	2.18833	0.00864021	0.0373368	0.999993
70966	chr1	121177200	121177849	FALSE	Stable	2.82872	9.90899e-05	2.35306	0.00495006	0.32285	0.999993
70967	chr1	121177950	121178299	FALSE	Stable	2.17436	0.00233024	1.71246	0.0384776	-0.0529331	0.999993
70968	chr1	121178550	121178699	FALSE	other	2.58622	0.000328617	0.124543	0.880495	0.587591	0.999993
70969	chr1	121180200	121180349	FALSE	Stable	2.16988	0.0023767	2.20165	0.00826973	-0.695084	0.999993
70970	chr1	121327000	121327799	TRUE	Stable	2.94596	5.56734e-05	2.7048	0.00145831	0.325492	0.999993
70971	chr1	121327950	121328799	TRUE	Stable	3.13702	2.22048e-05	2.81124	0.00101732	-0.18745	0.999993
70972	chr1	121430600	121430749	FALSE	other	0.97051	0.171671	3.29685	0.000239387	-0.198624	0.999993
70973	chr1	121430850	121432149	FALSE	Stable	3.58836	3.06717e-06	3.41702	0.000178087	0.123707	0.999993
70974	chr1	121432300	121432699	FALSE	other	0.134164	0.851511	3.39619	0.0001876	-0.758297	0.999993
70975	chr1	121527350	121527449	FALSE	other	1.00994	0.154961	3.45519	0.00016324	0.152969	0.999993
70976	chr1	121527800	121528649	FALSE	Stable	3.00248	4.21989e-05	3.31464	0.000228573	0.0616697	0.999993
70977	chr1	121566700	121567649	FALSE	Stable	3.96638	6.78363e-07	3.0422	0.000485704	0.217249	0.999993
70978	chr1	121771050	121771249	FALSE	other	2.03382	0.00433796	0.678801	0.409263	0.899875	0.999993
70979	chr1	124040550	124040649	FALSE	other	1.4128	0.0467285	0.126037	0.8791	0.623447	0.999993
70980	chr1	124045650	124046149	FALSE	Stable	4.08738	4.36473e-07	2.22308	0.00769323	0.0381771	0.999993
70981	chr1	125124200	125124449	FALSE	other	3.60155	2.91371e-06	0.506651	0.538344	1.1399	0.999993
70982	chr1	125433250	125433699	FALSE	Stable	3.20489	1.60868e-05	1.70841	0.0389217	-0.37761	0.999993
70983	chr1	125434000	125435349	FALSE	Stable	3.42499	6.11435e-06	2.64877	0.00176189	0.064646	0.999993
70984	chr1	125436100	125436549	TRUE	Stable	2.58969	0.000323312	2.90027	0.000757846	0.293722	0.999993
70985	chr1	125526100	125526299	FALSE	Stable	2.5902	0.000322503	1.6333	0.0481713	0.426892	0.999993
70986	chr1	125559900	125560449	TRUE	Stable	4.38506	1.22377e-07	2.84509	0.000908537	0.242268	0.999993
70987	chr1	125561050	125561849	TRUE	Stable	2.62569	0.000270132	2.8657	0.000846727	0.334166	0.999993
70988	chr1	125735750	125735899	FALSE	other	2.33203	0.00112269	1.49354	0.0703187	1.7202	0.741611
70989	chr1	125911150	125912599	FALSE	Stable	3.14283	2.16128e-05	3.42654	0.000173666	0.0273053	0.999993
70990	chr1	125912700	125912999	FALSE	Stable	2.3146	0.00121828	3.68052	0.000102336	-0.517344	0.999993
70991	chr1	126333750	126333849	FALSE	other	1.46631	0.0390493	1.59743	0.0531379	0.323718	0.999993
70992	chr1	126492300	126493199	FALSE	Stable	2.96363	5.11182e-05	3.19723	0.000310277	0.209752	0.999993
70993	chr1	126737750	126738449	FALSE	Stable	2.44591	0.000652762	3.03283	0.000501138	0.166335	0.999993
70994	chr1	126829850	126830949	FALSE	Stable	2.95838	5.23944e-05	3.6941	9.96223e-05	-0.138132	0.999993
70995	chr1	127204450	127204649	FALSE	other	2.56935	0.000356835	0.0247201	0.976321	0.701875	0.999993
70996	chr1	127205150	127206649	TRUE	Stable	3.36396	8.04261e-06	3.16989	0.000334883	0.142878	0.999993
70997	chr1	127206850	127207049	FALSE	other	3.1103	2.52207e-05	1.13173	0.169236	0.849939	0.999993
70998	chr1	127445150	127445349	FALSE	other	-0.480541	0.499681	1.88321	0.0230592	-2.19102	0.168659
70999	chr1	127677000	127678099	FALSE	Stable	2.76684	0.000134501	2.98115	0.000586326	-0.0115091	0.999993
71000	chr1	127773000	127773749	FALSE	Stable	2.55134	0.000390283	3.21363	0.000296898	0.041874	0.999993
71001	chr1	127774800	127776099	FALSE	Stable	3.2434	1.34701e-05	3.09152	0.000419904	0.111691	0.999993
71002	chr1	127776300	127776449	FALSE	other	1.98135	0.00544043	0.904549	0.271413	-0.445565	0.999993
71003	chr1	127869000	127869499	FALSE	Stable	2.62417	0.000272123	2.36456	0.00475596	0.265035	0.999993
71004	chr1	128101450	128102799	FALSE	Stable	3.16463	1.94465e-05	2.84272	0.000916604	0.149827	0.999993
71005	chr1	128103600	128104449	FALSE	Stable	3.36952	7.82749e-06	2.51031	0.00286186	0.103628	0.999993
71006	chr1	128243650	128243999	FALSE	Stable	1.81407	0.0108295	2.75003	0.0012474	-0.205707	0.999993
71007	chr1	128244400	128245249	FALSE	Stable	2.79333	0.000117838	3.00932	0.000538804	-0.0409183	0.999993
71008	chr1	128357850	128359549	FALSE	Stable	2.66993	0.000217216	3.05731	0.000464695	0.0365258	0.999993
71009	chr1	128359750	128360099	FALSE	other	5.19165	1.38292e-09	1.58148	0.0555085	0.493747	0.999993
71010	chr1	128416250	128417149	FALSE	Stable	3.39465	6.97595e-06	3.30779	0.000232278	0.191531	0.999993
71011	chr1	128417300	128417499	FALSE	Stable	2.35539	0.00100642	2.24524	0.00713815	-0.0359992	0.999993
71012	chr1	128472250	128472949	FALSE	Stable	2.89623	7.11544e-05	2.68641	0.00155109	-0.133597	0.999993
71013	chr1	128590750	128593799	FALSE	Stable	3.46459	5.15809e-06	3.55448	0.000130957	0.0242465	0.999993
71014	chr1	128832500	128832749	FALSE	other	2.47833	0.000558226	1.49121	0.0707483	-0.343689	0.999993
71015	chr1	129273300	129274099	FALSE	Stable	3.39986	6.81456e-06	3.35158	0.000208761	-0.22305	0.999993
71016	chr1	130245600	130245699	FALSE	other	0.652551	0.358405	-0.461456	0.575365	0.584003	0.999993
71017	chr1	130300000	130300799	FALSE	Stable	2.26849	0.0015121	2.80727	0.00103005	0.0495551	0.999993
71018	chr1	130422300	130422449	FALSE	Stable	1.61317	0.023283	1.84662	0.0258117	0.349238	0.999993
71019	chr1	130462100	130463099	FALSE	Stable	3.11992	2.41026e-05	3.0733	0.000443392	-0.000209197	0.999993
71020	chr1	130548350	130548499	FALSE	Stable	1.41579	0.0462886	2.95214	0.000640975	-1.08152	0.999993
71021	chr1	130715100	130718149	TRUE	Stable	3.31795	9.74395e-06	3.20743	0.000302462	0.0895904	0.999993
71022	chr1	130878050	130878749	FALSE	Stable	2.83916	9.41173e-05	2.97151	0.000603981	0.0318829	0.999993
71023	chr1	131031550	131031649	FALSE	other	1.71184	0.0161132	1.19351	0.147331	0.429896	0.999993
71024	chr1	131096100	131097749	TRUE	Stable	3.39154	7.05689e-06	3.41647	0.000178508	-0.0253239	0.999993
71025	chr1	131137350	131139099	TRUE	Stable	3.31616	9.80987e-06	3.57782	0.000124295	-0.209877	0.999993
71026	chr1	131152750	131153099	FALSE	Stable	1.98276	0.00540763	3.06009	0.000460557	-0.252082	0.999993
71027	chr1	131153250	131154299	FALSE	Stable	2.59991	0.000307294	3.38925	0.000190752	0.264642	0.999993
71028	chr1	131244600	131245899	FALSE	Stable	3.88335	9.34885e-07	2.92984	0.000688233	0.254847	0.999993
71029	chr1	131524000	131524399	FALSE	other	2.45817	0.000614916	1.11022	0.177305	0.93969	0.999993
71030	chr1	131524550	131525999	FALSE	Stable	3.65262	2.38462e-06	3.61665	0.000114615	0.211041	0.999993
71031	chr1	131526150	131527099	FALSE	Stable	2.79029	0.000119616	2.43365	0.00373768	0.0156372	0.999993
71032	chr1	131527950	131529249	FALSE	Stable	3.61239	2.79933e-06	3.26107	0.000261754	0.171195	0.999993
71033	chr1	131529700	131529799	FALSE	other	1.09573	0.122847	2.95267	0.000639792	0.741272	0.999993
71034	chr1	131537250	131537349	FALSE	other	-1.26723	0.0742828	2.78868	0.00109583	-2.23719	0.147346
71035	chr1	131643450	131643599	FALSE	Stable	1.85811	0.00907277	1.97864	0.017123	-0.24057	0.999993
71036	chr1	131797300	131797949	FALSE	Stable	1.88951	0.00798213	2.83843	0.000929456	-0.244761	0.999993
71037	chr1	131827150	131827849	TRUE	Stable	3.4842	4.74434e-06	3.00788	0.000541036	0.204989	0.999993
71038	chr1	131828100	131829149	TRUE	Stable	3.20781	1.58757e-05	2.79068	0.00108774	-0.0439976	0.999993
71039	chr1	131829250	131829499	FALSE	other	1.9703	0.00569873	1.15445	0.160979	0.466717	0.999993
71040	chr1	131867000	131867999	FALSE	Stable	2.85761	8.61257e-05	2.91167	0.000731622	-0.0351809	0.999993
71041	chr1	131910750	131910999	FALSE	Stable	3.30032	1.04349e-05	1.80049	0.0296517	0.371197	0.999993
71042	chr1	131911250	131912099	FALSE	Stable	2.80888	0.000109119	3.0196	0.000520979	-0.187312	0.999993
71043	chr1	131962350	131963949	FALSE	Stable	3.62682	2.63963e-06	3.24755	0.000270386	0.0382719	0.999993
71044	chr1	131972500	131972699	FALSE	Stable	1.62595	0.0222031	1.99983	0.0160131	-0.510148	0.999993
71045	chr1	132007150	132007999	FALSE	Stable	2.90292	6.87387e-05	2.58402	0.00220731	0.294085	0.999993
71046	chr1	132008200	132009199	FALSE	Stable	3.16885	1.90722e-05	2.85568	0.000876534	0.272977	0.999993
71047	chr1	132067450	132068449	FALSE	Stable	3.16457	1.94479e-05	2.96141	0.000623201	0.0243091	0.999993
71048	chr1	132138800	132139899	FALSE	Stable	3.34315	8.79024e-06	3.35291	0.000208096	0.15316	0.999993
71049	chr1	132157700	132157849	FALSE	other	0.862095	0.224809	2.40979	0.00406088	-0.494509	0.999993
71050	chr1	132190150	132191999	TRUE	Stable	3.4391	5.7425e-06	3.32678	0.000222121	0.296157	0.999993
71051	chr1	132192100	132192649	FALSE	other	2.66852	0.000218682	0.682341	0.40684	1.27925	0.999993
71052	chr1	132200150	132200349	FALSE	other	0.553501	0.43662	2.5414	0.00256263	-0.431428	0.999993
71053	chr1	132212300	132212499	FALSE	other	2.56296	0.000368447	1.61793	0.0502474	0.281717	0.999993
71054	chr1	132298450	132299399	FALSE	Stable	3.32831	9.37527e-06	3.63321	0.000111456	0.159441	0.999993
71055	chr1	132315900	132316749	FALSE	Stable	3.37491	7.61909e-06	2.89573	0.000770133	0.101472	0.999993
71056	chr1	132333850	132333999	FALSE	other	2.4658	0.000592858	1.58804	0.054527	0.214444	0.999993
71057	chr1	132390600	132391749	FALSE	Stable	3.6134	2.78999e-06	3.74466	8.89854e-05	-0.0886526	0.999993
71058	chr1	132417050	132417349	FALSE	other	2.17893	0.00228303	1.07015	0.193391	0.759646	0.999993
71059	chr1	132417500	132418499	FALSE	Stable	3.11012	2.52414e-05	3.29295	0.000241371	0.0520542	0.999993
71060	chr1	132418650	132418749	FALSE	other	1.00859	0.155488	1.45234	0.078341	0.199473	0.999993
71061	chr1	132476300	132478349	TRUE	Stable	2.65271	0.000236462	3.50599	0.000145698	-0.116654	0.999993
71062	chr1	132542600	132542849	FALSE	other	2.88208	7.62471e-05	1.36827	0.0969626	0.385177	0.999993
71063	chr1	132688100	132688249	FALSE	other	3.6665	2.26856e-06	0.0703576	0.932732	0.840341	0.999993
71064	chr1	132741450	132742099	FALSE	Stable	2.27717	0.00145311	2.68698	0.00154812	-0.0359848	0.999993
71065	chr1	132880150	132881749	FALSE	Stable	3.6352	2.56352e-06	3.63079	0.000111712	0.20627	0.999993
71066	chr1	133024400	133025149	TRUE	Stable	2.62669	0.00026876	3.8879	6.58868e-05	0.0600126	0.999993
71067	chr1	133025500	133025799	TRUE	other	1.24503	0.079531	2.54456	0.00253632	-0.302088	0.999993
71068	chr1	133033200	133033699	FALSE	Stable	2.33311	0.0011175	2.7524	0.0012376	-0.00654213	0.999993
71069	chr1	133033800	133033949	FALSE	other	2.14277	0.00268346	1.17262	0.1545	0.0330641	0.999993
71070	chr1	133034000	133034299	FALSE	other	1.38172	0.051789	2.95717	0.000632293	-0.0189796	0.999993
71071	chr1	133045350	133047599	FALSE	Stable	3.22977	1.43161e-05	3.69683	9.86297e-05	0.17018	0.999993
71072	chr1	133130500	133131049	TRUE	Stable	3.35504	8.36744e-06	2.07324	0.0126448	0.121214	0.999993
71073	chr1	133131900	133134849	FALSE	Stable	3.33022	9.29758e-06	3.40728	0.000182846	-0.00210462	0.999993
71074	chr1	133163600	133164599	FALSE	Stable	4.01354	5.62215e-07	3.46171	0.000161631	-0.0376899	0.999993
71075	chr1	133164850	133165049	FALSE	other	0.897347	0.206476	2.6064	0.0020425	-1.12636	0.999993
71076	chr1	133181150	133182049	FALSE	Stable	2.84081	9.34565e-05	3.4825	0.000153665	-0.177758	0.999993
71077	chr1	133182250	133182949	FALSE	Stable	2.60154	0.000304794	3.16947	0.000335266	0.0450315	0.999993
71078	chr1	133183200	133183399	FALSE	Stable	1.66212	0.0194288	2.14681	0.00991592	-0.311968	0.999993
71079	chr1	133237750	133237949	TRUE	other	0.0376167	0.957838	3.08369	0.000429703	0.314038	0.999993
71080	chr1	133329450	133329749	FALSE	Stable	2.27023	0.00150089	2.02597	0.0147286	-0.0589393	0.999993
71081	chr1	133363250	133364499	TRUE	Stable	3.60286	2.8981e-06	3.07009	0.000447771	0.19032	0.999993
71082	chr1	133408850	133409099	FALSE	Stable	1.47777	0.0375645	2.52018	0.00276256	-0.363853	0.999993
71083	chr1	133418000	133418349	FALSE	Stable	2.62226	0.000274529	2.09553	0.0117609	0.365538	0.999993
71084	chr1	133418400	133418599	FALSE	other	0.942756	0.184342	2.69244	0.00151882	-0.663449	0.999993
71085	chr1	133422200	133424449	FALSE	Stable	3.51697	4.15164e-06	3.48859	0.000150735	0.149484	0.999993
71086	chr1	133434200	133434749	FALSE	Stable	1.79282	0.0117862	3.45469	0.00016324	0.222204	0.999993
71087	chr1	133492550	133493549	FALSE	Stable	2.77601	0.000128458	3.19482	0.000312208	-0.042111	0.999993
71088	chr1	133608950	133609749	TRUE	Stable	2.80699	0.000110215	2.56272	0.00237645	-0.26897	0.999993
71089	chr1	133660150	133660949	FALSE	Stable	3.60983	2.83153e-06	3.49802	0.000147929	0.0559369	0.999993
71090	chr1	133661650	133661849	FALSE	Stable	1.53515	0.0307826	3.15536	0.000347611	0.195802	0.999993
71091	chr1	133736150	133736349	FALSE	Stable	2.45052	0.000638035	2.07897	0.0124118	0.225388	0.999993
71092	chr1	133800000	133800199	FALSE	Stable	2.09255	0.00336143	2.77752	0.00113581	0.163599	0.999993
71093	chr1	133800350	133801349	FALSE	Stable	3.05486	3.2805e-05	2.86589	0.000846453	0.0104375	0.999993
71094	chr1	133854600	133855249	TRUE	Stable	3.05652	3.25456e-05	1.69868	0.0400234	0.194656	0.999993
71095	chr1	133908400	133908549	FALSE	Stable	2.76137	0.000138107	2.57114	0.00230843	-0.473077	0.999993
71096	chr1	133908600	133909199	FALSE	Stable	1.89121	0.00792641	3.49737	0.000148058	-0.126123	0.999993
71097	chr1	134060450	134060599	FALSE	Stable	1.68514	0.017829	1.66446	0.0441155	-0.115596	0.999993
71098	chr1	134060700	134060899	TRUE	Stable	2.27493	0.00146809	1.80879	0.0289215	0.304952	0.999993
71099	chr1	134061050	134061649	TRUE	Stable	2.98459	4.62191e-05	2.65371	0.00173279	0.435547	0.999993
71100	chr1	134078100	134079249	FALSE	Stable	3.4153	6.38069e-06	2.95429	0.000636955	0.28319	0.999993
71101	chr1	134079450	134079649	FALSE	Stable	2.00441	0.00492448	2.11811	0.010913	0.231992	0.999993
71102	chr1	134092750	134093149	FALSE	Stable	2.41795	0.000746374	2.51157	0.00284806	0.0810287	0.999993
71103	chr1	134093250	134093699	FALSE	Stable	2.31382	0.00122208	2.91239	0.000729742	0.291636	0.999993
71104	chr1	134098800	134099799	FALSE	Stable	2.77922	0.000126335	2.86602	0.000846108	0.268633	0.999993
71105	chr1	134099950	134100049	FALSE	other	1.33967	0.0593108	2.877	0.00081451	0.590384	0.999993
71106	chr1	134234750	134235849	FALSE	Stable	3.01591	3.95001e-05	2.48962	0.0030783	-0.0342354	0.999993
71107	chr1	134298650	134299649	FALSE	Stable	3.15623	2.02946e-05	2.84929	0.000895865	0.00423308	0.999993
71108	chr1	134344050	134344849	FALSE	Stable	3.30199	1.03731e-05	3.37467	0.000196517	0.0545186	0.999993
71109	chr1	134360850	134361699	TRUE	Stable	3.78126	1.39207e-06	2.61081	0.00201092	0.265875	0.999993
71110	chr1	134362250	134362749	TRUE	Stable	3.36032	8.17335e-06	3.3961	0.0001876	-0.199777	0.999993
71111	chr1	134381900	134382449	FALSE	Stable	2.71453	0.000173695	2.52501	0.00271761	0.246965	0.999993
71112	chr1	134382550	134382749	FALSE	Stable	2.72031	0.000168713	1.67517	0.0427718	0.589998	0.999993
71113	chr1	134405650	134406849	TRUE	Stable	3.58789	3.07268e-06	3.22658	0.000285839	0.0719275	0.999993
71114	chr1	134414700	134415199	TRUE	Stable	2.484	0.000542796	3.58454	0.000122501	0.204922	0.999993
71115	chr1	134415900	134416749	TRUE	Stable	2.54677	0.000399199	3.43297	0.000171068	-0.173998	0.999993
71116	chr1	134419300	134419449	FALSE	other	0.595378	0.402412	3.37785	0.000195056	-0.654757	0.999993
71117	chr1	134454750	134456649	FALSE	Stable	3.13009	2.29541e-05	3.21672	0.000294581	0.0990248	0.999993
71118	chr1	134494100	134494599	TRUE	Stable	3.13976	2.19234e-05	2.6363	0.00184005	0.333806	0.999993
71119	chr1	134494700	134495499	TRUE	Stable	3.73212	1.70541e-06	2.51642	0.00279965	0.162388	0.999993
71120	chr1	134513150	134513849	FALSE	Stable	3.25135	1.29697e-05	3.05856	0.000462916	-0.0785324	0.999993
71121	chr1	134514050	134514199	FALSE	other	3.53141	3.89995e-06	0.825787	0.31543	0.17076	0.999993
71122	chr1	134555700	134555849	FALSE	other	1.92431	0.00691995	0.993208	0.227279	0.303011	0.999993
71123	chr1	134556000	134556999	FALSE	Stable	2.73595	0.000156701	3.28141	0.000248237	0.070137	0.999993
71124	chr1	134559950	134560049	FALSE	other	1.3326	0.0606408	3.49346	0.000149213	-0.0331457	0.999993
71125	chr1	134560650	134560899	FALSE	Stable	2.65621	0.000232241	2.57439	0.00228316	0.536658	0.999993
71126	chr1	134561650	134562349	FALSE	Stable	3.15174	2.07358e-05	2.44056	0.00365094	0.167828	0.999993
71127	chr1	134646300	134647149	FALSE	Stable	2.80066	0.000113667	2.79793	0.00106286	-0.0953832	0.999993
71128	chr1	134647200	134647299	FALSE	Stable	1.71287	0.0160618	1.92286	0.0204109	-0.739994	0.999993
71129	chr1	134708550	134709649	FALSE	Stable	3.40147	6.77025e-06	3.46489	0.00016064	0.090776	0.999993
71130	chr1	134775050	134775149	FALSE	other	1.4747	0.0379562	-0.48275	0.55776	0.565293	0.999993
71131	chr1	134955050	134956399	FALSE	Stable	3.24217	1.35412e-05	2.60043	0.00208627	0.048131	0.999993
71132	chr1	134962000	134962399	FALSE	Stable	2.73273	0.000159179	2.22819	0.00755721	-0.113998	0.999993
71133	chr1	134962550	134963699	FALSE	Stable	2.86032	8.50539e-05	2.86262	0.000855507	0.278675	0.999993
71134	chr1	134987550	134988249	FALSE	Stable	2.95689	5.2722e-05	2.6536	0.00173341	-0.0237074	0.999993
71135	chr1	135105000	135105349	FALSE	Stable	2.06345	0.0038141	2.90114	0.0007556	-0.271057	0.999993
71136	chr1	135146100	135148499	FALSE	Stable	3.29872	1.05022e-05	3.21539	0.00029532	0.13426	0.999993
71137	chr1	135148550	135148699	FALSE	other	0.219293	0.759688	1.9681	0.0177141	-0.341403	0.999993
71138	chr1	135199150	135199399	FALSE	Stable	2.54886	0.000395093	2.48932	0.0030814	0.122886	0.999993
71139	chr1	135258450	135259149	FALSE	Stable	2.1547	0.00254443	3.03925	0.000490351	0.0260382	0.999993
71140	chr1	135282800	135284249	FALSE	Stable	3.34159	8.85575e-06	3.01089	0.000535868	0.109211	0.999993
71141	chr1	135312350	135313499	FALSE	Stable	3.27685	1.15484e-05	3.15435	0.000348997	0.0976831	0.999993
71142	chr1	135313900	135314349	FALSE	Stable	2.98644	4.57846e-05	3.31555	0.000228406	0.151671	0.999993
71143	chr1	135324450	135324599	FALSE	Stable	2.50033	0.000501042	2.20995	0.00804244	-0.372938	0.999993
71144	chr1	135368150	135368849	FALSE	Stable	2.55965	0.000374675	3.96215	5.62957e-05	-0.0700989	0.999993
71145	chr1	135369000	135369199	FALSE	Stable	2.82602	0.000100395	2.10325	0.0114705	-0.214315	0.999993
71146	chr1	135374050	135375399	TRUE	Stable	3.11027	2.5223e-05	2.70051	0.00147937	0.450035	0.999993
71147	chr1	135375450	135375699	FALSE	other	2.25858	0.00158473	1.36971	0.0966157	0.260782	0.999993
71148	chr1	135428400	135428549	FALSE	other	0.933197	0.188898	3.3922	0.000189427	0.139217	0.999993
71149	chr1	135428900	135429949	FALSE	Stable	3.01494	3.97052e-05	3.4469	0.000165748	-0.0581374	0.999993
71150	chr1	135430000	135430249	FALSE	Stable	2.45052	0.000638035	1.93234	0.0198209	0.37202	0.999993
71151	chr1	135430500	135431149	FALSE	Stable	2.64218	0.000249231	2.83366	0.000942982	0.1453	0.999993
71152	chr1	135509650	135510899	TRUE	Stable	3.16205	1.96888e-05	2.54162	0.0025614	0.307213	0.999993
71153	chr1	135564300	135564499	FALSE	other	2.51631	0.000463748	0.351117	0.670228	1.09192	0.999993
71154	chr1	135579050	135579299	TRUE	Stable	2.95109	5.41847e-05	2.33937	0.00518362	0.475454	0.999993
71155	chr1	135579500	135579849	TRUE	Stable	2.43087	0.000702709	3.76992	8.49157e-05	0.0683523	0.999993
71156	chr1	135582800	135585399	FALSE	Stable	3.24788	1.31906e-05	3.58499	0.000122501	0.165496	0.999993
71157	chr1	135585550	135585999	FALSE	Stable	3.22746	1.44603e-05	2.63651	0.00183871	0.135801	0.999993
71158	chr1	135659950	135660199	FALSE	Stable	2.21501	0.00193585	2.76465	0.00118708	0.287394	0.999993
71159	chr1	135660450	135660549	FALSE	Stable	1.81021	0.0109954	2.98892	0.00057352	0.246278	0.999993
71160	chr1	135686500	135688799	FALSE	Stable	3.53671	3.80862e-06	3.53569	0.000136706	0.153419	0.999993
71161	chr1	135698700	135699799	FALSE	Stable	3.25063	1.30058e-05	2.58863	0.00217234	0.233963	0.999993
71162	chr1	135728750	135729899	FALSE	Stable	3.61818	2.7367e-06	3.35528	0.000207143	0.194607	0.999993
71163	chr1	135765650	135767049	TRUE	Stable	3.33219	9.21331e-06	3.12579	0.000379415	0.0913439	0.999993
71164	chr1	135818350	135819349	FALSE	Stable	3.11708	2.44155e-05	2.92594	0.000697552	0.163003	0.999993
71165	chr1	135918750	135919249	FALSE	Stable	2.81517	0.000105916	1.71545	0.0381372	0.350553	0.999993
71166	chr1	136007350	136008399	FALSE	Stable	3.0129	4.0128e-05	2.66664	0.00165979	-0.214264	0.999993
71167	chr1	136018150	136019149	FALSE	Stable	2.91148	6.59538e-05	2.65013	0.00175415	0.429263	0.999993
71168	chr1	136051300	136051399	FALSE	Stable	2.35997	0.000984662	2.28697	0.00620133	0.527845	0.999993
71169	chr1	136130850	136131049	FALSE	Stable	1.86922	0.00867577	3.40383	0.000184571	-0.127209	0.999993
71170	chr1	136131350	136132449	FALSE	Stable	3.84622	1.07422e-06	3.06177	0.000458535	0.245559	0.999993
71171	chr1	136132700	136132799	FALSE	other	0.905152	0.202635	3.24011	0.000276175	-1.48639	0.999993
71172	chr1	136140050	136140799	FALSE	Stable	3.64325	2.48318e-06	3.31912	0.000226147	0.148787	0.999993
71173	chr1	136231000	136231149	FALSE	other	1.69879	0.0169308	1.1349	0.168076	-0.0641961	0.999993
71174	chr1	136231700	136233599	FALSE	Stable	3.39502	6.96324e-06	3.10581	0.000403201	0.185763	0.999993
71175	chr1	136233650	136234799	TRUE	Stable	3.09488	2.70641e-05	2.74354	0.00127485	0.365429	0.999993
71176	chr1	136259800	136261049	FALSE	Stable	3.16471	1.94465e-05	3.36524	0.000202068	0.0889843	0.999993
71177	chr1	136343800	136345749	FALSE	Stable	3.38895	7.13236e-06	3.54026	0.000135322	0.0690424	0.999993
71178	chr1	136345900	136346049	TRUE	Stable	1.47694	0.0376722	2.20084	0.00828759	-0.399551	0.999993
71179	chr1	136346200	136346949	TRUE	Stable	2.99253	4.43731e-05	3.02533	0.000513007	-0.0576105	0.999993
71180	chr1	136414550	136415299	FALSE	Stable	2.0377	0.00426757	2.88725	0.000790027	-0.336441	0.999993
71181	chr1	136415800	136416049	FALSE	Stable	2.5071	0.000484924	2.2457	0.00712776	-0.193747	0.999993
71182	chr1	136465950	136466099	FALSE	other	1.85294	0.00926645	1.36186	0.0985494	0.521443	0.999993
71183	chr1	136466350	136467099	FALSE	Stable	2.9815	4.68882e-05	3.18298	0.000322888	0.0129531	0.999993
71184	chr1	136467200	136467299	FALSE	other	1.00906	0.155297	1.81563	0.028333	0.600835	0.999993
71185	chr1	136519050	136519149	FALSE	Stable	1.8104	0.01099	1.82481	0.0275538	0.440423	0.999993
71186	chr1	136570050	136570249	FALSE	other	1.35873	0.0558208	2.12782	0.0105681	0.0679516	0.999993
71187	chr1	136588650	136588999	TRUE	Stable	2.19541	0.00211987	2.43155	0.00376405	-0.0819994	0.999993
71188	chr1	136589400	136589499	TRUE	Stable	2.11945	0.00297906	2.22904	0.00753643	0.345248	0.999993
71189	chr1	136624100	136624699	TRUE	Stable	3.78954	1.35178e-06	2.46187	0.00339247	0.468994	0.999993
71190	chr1	136625050	136625999	TRUE	Stable	2.68196	0.000204616	2.67847	0.0015947	-0.0188812	0.999993
71191	chr1	136696350	136696599	FALSE	Stable	2.73136	0.00016009	2.14489	0.00998356	-0.233171	0.999993
71192	chr1	136793500	136793749	FALSE	Stable	2.83153	9.76511e-05	2.50671	0.00289878	-0.130329	0.999993
71193	chr1	136945850	136946049	FALSE	other	3.66588	2.27084e-06	0.94938	0.248301	0.761502	0.999993
71194	chr1	136946350	136946699	FALSE	Stable	2.75644	0.000141401	1.9673	0.0177585	0.259134	0.999993
71195	chr1	136947400	136947549	FALSE	Stable	3.60534	2.86573e-06	1.82481	0.0275538	0.810374	0.999993
71196	chr1	136948250	136949549	FALSE	Stable	3.13203	2.27509e-05	3.09009	0.000422135	0.289275	0.999993
71197	chr1	136952850	136953449	FALSE	Stable	2.50124	0.000498856	2.05851	0.0132642	0.0993238	0.999993
71198	chr1	137221500	137221949	FALSE	other	1.38251	0.0516541	2.67738	0.00160119	-0.154029	0.999993
71199	chr1	137898700	137899199	FALSE	Stable	3.55085	3.5934e-06	2.29199	0.0060959	0.373172	0.999993
71200	chr1	137899550	137900299	TRUE	Stable	2.62072	0.000276672	2.66726	0.00165697	0.0458279	0.999993
71201	chr1	137900450	137901899	TRUE	Stable	2.71129	0.000176699	2.95011	0.000644972	0.0949603	0.999993
71202	chr1	137902050	137902399	FALSE	Stable	1.41286	0.0467285	2.7467	0.00126134	-0.336403	0.999993
71203	chr1	137902750	137902899	FALSE	Stable	1.91813	0.00708625	2.27668	0.00642093	-0.446993	0.999993
71204	chr1	137905950	137906149	FALSE	other	1.10445	0.119849	2.05825	0.0132723	-0.781078	0.999993
71205	chr1	138040450	138040549	FALSE	other	0.166794	0.81552	3.46068	0.000161631	-1.16617	0.999993
71206	chr1	138248050	138248249	TRUE	other	1.2244	0.0846651	3.63523	0.000111144	-0.0287633	0.999993
71207	chr1	138283350	138283549	FALSE	other	1.28044	0.0713263	3.14124	0.000363186	-0.435806	0.999993
71208	chr1	138385250	138385749	TRUE	Stable	2.48224	0.000547792	2.83863	0.000929195	0.0611726	0.999993
71209	chr1	138617400	138619249	FALSE	Stable	2.92094	6.29207e-05	3.3769	0.000195329	0.0502843	0.999993
71210	chr1	138619350	138620199	FALSE	Stable	2.71235	0.000175669	2.533	0.00264083	0.298128	0.999993
71211	chr1	138620250	138620499	FALSE	other	2.27991	0.00143496	0.959505	0.243357	0.167203	0.999993
71212	chr1	138834700	138835399	FALSE	Stable	1.42551	0.0448546	3.38972	0.00019045	-1.48342	0.999993
71213	chr1	138836100	138836599	FALSE	Stable	2.31133	0.00123717	2.49756	0.00299513	-0.501554	0.999993
71214	chr1	138836700	138838099	TRUE	Stable	2.86552	8.28604e-05	3.05358	0.000469833	-0.41521	0.999993
71215	chr1	138838300	138840049	TRUE	Stable	2.72054	0.000168555	2.90473	0.000747716	-0.22893	0.999993
71216	chr1	138840850	138841099	FALSE	Stable	1.8646	0.00883985	2.97081	0.000605407	0.134922	0.999993
71217	chr1	138842150	138842249	FALSE	Stable	1.52728	0.0316357	1.83843	0.0264578	0.84641	0.999993
71218	chr1	138842350	138844999	FALSE	Stable	3.4516	5.44518e-06	2.72996	0.00133546	0.0980369	0.999993
71219	chr1	138845200	138846399	FALSE	Stable	1.83837	0.00982814	2.94544	0.000654338	-0.410791	0.999993
71220	chr1	138846450	138846899	FALSE	Stable	2.36633	0.000955748	3.03732	0.000493377	-0.261129	0.999993
71221	chr1	138847250	138847449	FALSE	other	2.80032	0.000113837	1.57587	0.056362	0.490088	0.999993
71222	chr1	138848050	138849599	FALSE	Stable	3.15016	2.08883e-05	3.35281	0.000208096	0.101174	0.999993
71223	chr1	138855950	138856399	TRUE	Stable	2.79233	0.000118432	2.93252	0.000682583	0.503028	0.999993
71224	chr1	138876250	138876649	FALSE	other	1.31077	0.0649178	4.71093	5.85743e-06	-0.163564	0.999993
71225	chr1	138963000	138963849	TRUE	Stable	3.82577	1.1622e-06	2.87132	0.000830665	0.160287	0.999993
71226	chr1	138964150	138964749	TRUE	Stable	3.44572	5.59642e-06	3.78531	8.17747e-05	0.303638	0.999993
71227	chr1	139194700	139194999	FALSE	other	3.07978	2.909e-05	0.812748	0.323105	0.874871	0.999993
71228	chr1	139208150	139208249	TRUE	Stable	3.09548	2.69873e-05	3.17116	0.000333633	-0.07568	0.999993
71229	chr1	139421450	139422099	TRUE	Stable	3.03629	3.59162e-05	2.47241	0.0032703	0.310724	0.999993
71230	chr1	139422400	139423399	TRUE	Stable	2.97829	4.76228e-05	2.93292	0.000681842	-0.0130924	0.999993
71231	chr1	139425050	139425449	FALSE	Stable	1.88753	0.0080469	2.05417	0.0134526	0.335213	0.999993
71232	chr1	139425500	139425749	FALSE	Stable	2.75382	0.000143212	2.02478	0.0147879	0.100955	0.999993
71233	chr1	139454100	139454599	FALSE	Stable	3.61929	2.72354e-06	2.42279	0.00388249	0.0391514	0.999993
71234	chr1	139455000	139455999	FALSE	Stable	2.93556	5.8535e-05	3.25545	0.000265533	0.112979	0.999993
71235	chr1	140245300	140246549	FALSE	Stable	3.76752	1.47142e-06	2.98374	0.000581884	0.172288	0.999993
71236	chr1	140459250	140459399	FALSE	other	-0.372151	0.601633	2.69667	0.00149775	-1.64383	0.92809
71237	chr1	141103100	141103249	FALSE	other	0.186582	0.794251	2.56758	0.00233682	-0.956006	0.999993
71238	chr1	143701050	143701199	FALSE	other	2.08452	0.00348001	1.36154	0.0986123	0.58672	0.999993
71239	chr1	143701450	143702599	TRUE	Stable	2.63884	0.000253219	3.13597	0.000368414	-0.064253	0.999993
71240	chr1	143702850	143703649	TRUE	Stable	3.05365	3.29804e-05	3.46467	0.000160673	-0.204883	0.999993
71241	chr1	143738900	143740449	FALSE	Stable	3.48504	4.72802e-06	2.61855	0.00195891	0.457645	0.999993
71242	chr1	143776150	143776999	FALSE	Stable	3.12944	2.30326e-05	2.83764	0.000932032	0.115862	0.999993
71243	chr1	143777500	143778449	FALSE	Stable	3.31375	9.897e-06	3.56362	0.000128349	0.126837	0.999993
71244	chr1	144003150	144004999	FALSE	Stable	3.2976	1.05614e-05	2.68834	0.00154132	0.0245896	0.999993
71245	chr1	146497200	146498649	FALSE	Stable	3.61439	2.77799e-06	3.23635	0.000279365	0.143022	0.999993
71246	chr1	146498700	146498849	FALSE	Stable	2.35367	0.00101393	1.69661	0.0402692	-0.996095	0.999993
71247	chr1	148177300	148177449	FALSE	other	1.8661	0.00878609	-0.256531	0.756318	2.00259	0.338758
71248	chr1	149960800	149961399	FALSE	Stable	1.94403	0.00636585	3.13886	0.000365805	-0.633649	0.999993
71249	chr1	150099350	150100599	FALSE	Stable	3.53312	3.87067e-06	3.76435	8.57481e-05	-0.0146165	0.999993
71250	chr1	150391900	150392649	FALSE	Stable	2.43358	0.00069347	2.51056	0.00285924	-0.0195308	0.999993
71251	chr1	150393850	150394349	FALSE	Stable	2.57138	0.000353341	3.28211	0.000247728	0.0195288	0.999993
71252	chr1	150394450	150394649	FALSE	Stable	1.64297	0.0208518	1.862	0.0246524	-0.0463004	0.999993
71253	chr1	150538000	150538149	FALSE	other	2.18317	0.00224084	0.732888	0.372884	0.11947	0.999993
71254	chr1	150681850	150681999	TRUE	Stable	1.77553	0.0126041	2.04264	0.0139604	0.315578	0.999993
71255	chr1	150933550	150933999	FALSE	Stable	1.9473	0.0062761	2.80096	0.00105164	-0.0284168	0.999993
71256	chr1	150991450	150993899	TRUE	Stable	3.34013	8.91016e-06	3.22372	0.000288123	-0.00866843	0.999993
71257	chr1	151177300	151178299	FALSE	Stable	2.528	0.00043788	2.8978	0.000764462	0.204377	0.999993
71258	chr1	151343850	151344149	FALSE	Stable	2.3052	0.0012739	2.48865	0.00308886	0.448538	0.999993
71259	chr1	151344650	151345049	FALSE	Stable	2.33135	0.00112596	1.86762	0.0242196	-0.00590586	0.999993
71260	chr1	151345550	151346949	FALSE	Stable	3.45363	5.40166e-06	2.92657	0.000695863	0.611384	0.999993
71261	chr1	151427300	151428249	TRUE	Stable	3.58135	3.16056e-06	2.75515	0.00122579	0.187067	0.999993
71262	chr1	151428850	151429849	TRUE	Stable	2.52074	0.000453684	2.6936	0.00151401	0.00991284	0.999993
71263	chr1	151499550	151500049	FALSE	Stable	2.96195	5.15359e-05	2.75891	0.00120862	0.0418581	0.999993
71264	chr1	151501150	151501599	TRUE	Stable	2.85774	8.60672e-05	2.00255	0.0158823	0.0561972	0.999993
71265	chr1	151571150	151571899	FALSE	Stable	2.50303	0.000494672	2.52421	0.00272575	-0.0740738	0.999993
71266	chr1	151754650	151755049	TRUE	Stable	2.48988	0.000527665	2.81012	0.00102039	-0.166099	0.999993
71267	chr1	151755450	151756499	TRUE	Stable	3.73315	1.70186e-06	3.311	0.000230301	-0.0168483	0.999993
71268	chr1	152084600	152085099	FALSE	Stable	2.17024	0.00237376	2.02516	0.0147694	-0.283186	0.999993
71269	chr1	152088750	152091399	TRUE	Stable	3.54644	3.66951e-06	3.06316	0.000456342	0.168109	0.999993
71270	chr1	152385750	152386499	FALSE	Stable	2.90339	6.86389e-05	2.92128	0.000707878	-0.192554	0.999993
71271	chr1	152399600	152400699	FALSE	Stable	3.64784	2.44284e-06	3.42312	0.000175262	0.156422	0.999993
71272	chr1	152589450	152589799	FALSE	other	2.19326	0.00214144	0.872732	0.288713	0.0435494	0.999993
71273	chr1	152623200	152625149	TRUE	Stable	3.04082	3.51116e-05	3.04584	0.000480809	0.187609	0.999993
71274	chr1	152625200	152625799	TRUE	Stable	2.39582	0.000829924	2.01519	0.015245	0.207571	0.999993
71275	chr1	152687700	152687899	FALSE	Stable	3.23069	1.42748e-05	2.38067	0.00449838	0.186709	0.999993
71276	chr1	152765600	152766449	FALSE	Stable	3.64073	2.51374e-06	2.6648	0.00166929	0.264349	0.999993
71277	chr1	152766800	152767949	FALSE	Stable	3.14485	2.14223e-05	3.40782	0.000182846	0.141704	0.999993
71278	chr1	152901300	152902199	FALSE	Stable	3.98483	6.43235e-07	2.94649	0.00065245	0.399201	0.999993
71279	chr1	152903400	152904649	FALSE	Stable	3.06157	3.1815e-05	3.73852	9.0238e-05	0.0804812	0.999993
71280	chr1	152954850	152955599	FALSE	Stable	3.4306	5.9669e-06	2.33334	0.00529093	0.458129	0.999993
71281	chr1	152955900	152956199	FALSE	Stable	1.48149	0.0371	2.36667	0.00472102	-0.539488	0.999993
71282	chr1	153185650	153186499	FALSE	Stable	2.89017	7.33044e-05	3.13221	0.000372425	-0.0992665	0.999993
71283	chr1	153291800	153292099	FALSE	Stable	1.94816	0.00625355	2.33283	0.00529874	0.45236	0.999993
71284	chr1	153331200	153332799	TRUE	Stable	4.30178	1.71673e-07	3.67712	0.000103222	0.0493706	0.999993
71285	chr1	153333150	153333849	TRUE	Stable	3.30159	1.03772e-05	2.50277	0.00294014	0.363405	0.999993
71286	chr1	153424650	153425549	FALSE	Stable	2.62725	0.000268092	2.9437	0.00065816	0.0461728	0.999993
71287	chr1	153485000	153486899	FALSE	Stable	3.12051	2.40396e-05	3.13839	0.000366223	-0.06551	0.999993
71288	chr1	153487100	153487199	TRUE	other	2.18317	0.00224084	0.820647	0.318462	-0.328914	0.999993
71289	chr1	153532100	153532199	FALSE	other	1.49303	0.0356447	0.992708	0.227515	-0.436758	0.999993
71290	chr1	153549200	153549999	FALSE	Stable	2.89977	6.98494e-05	2.98616	0.000578615	-0.16745	0.999993
71291	chr1	153599100	153599199	FALSE	other	2.16988	0.0023767	0.820969	0.318277	1.26047	0.999993
71292	chr1	153641550	153642499	FALSE	Stable	2.75208	0.000144427	2.83067	0.000952232	-0.15965	0.999993
71293	chr1	153652900	153653549	FALSE	Stable	2.18994	0.00217453	2.48798	0.00309554	0.145323	0.999993
71294	chr1	153665350	153665899	FALSE	Stable	2.45193	0.000633687	2.9028	0.000751383	-0.420509	0.999993
71295	chr1	153739900	153740999	FALSE	Stable	2.73037	0.00016088	3.40952	0.000182164	-0.159039	0.999993
71296	chr1	153749000	153749399	FALSE	Stable	2.44159	0.000666947	2.13236	0.0104084	-0.0645179	0.999993
71297	chr1	153899200	153899599	TRUE	Stable	1.69547	0.0171482	2.57316	0.00229312	0.222596	0.999993
71298	chr1	153900050	153901449	TRUE	Stable	3.25763	1.25988e-05	2.87831	0.000811219	0.0190795	0.999993
71299	chr1	153901550	153901799	FALSE	Stable	3.27581	1.16008e-05	1.68353	0.0417803	0.0699228	0.999993
71300	chr1	154204850	154205399	FALSE	Stable	2.77524	0.000128931	2.27494	0.00645736	-0.376123	0.999993
71301	chr1	154726050	154726249	FALSE	other	0.659438	0.353523	2.46782	0.00332341	-0.608368	0.999993
71302	chr1	154726300	154727099	FALSE	Stable	3.30287	1.03342e-05	3.65805	0.000107707	-0.230414	0.999993
71303	chr1	154883800	154884799	FALSE	Stable	3.37092	7.77972e-06	3.29765	0.000238989	-0.10267	0.999993
71304	chr1	155082600	155083399	TRUE	Stable	3.20218	1.6286e-05	2.91986	0.000711153	0.276488	0.999993
71305	chr1	155083750	155084099	TRUE	Stable	2.23002	0.00180609	2.51837	0.00277998	-0.0446662	0.999993
71306	chr1	155097550	155099649	FALSE	Stable	3.46785	5.08895e-06	3.31049	0.000230321	-0.082885	0.999993
71307	chr1	155109750	155109899	FALSE	other	2.88898	7.36635e-05	1.46183	0.0764343	0.763836	0.999993
71308	chr1	155158150	155158299	FALSE	other	1.27031	0.0735962	1.41315	0.0865828	0.439846	0.999993
71309	chr1	155158850	155159849	FALSE	Stable	2.78545	0.000122455	2.86596	0.00084624	0.11844	0.999993
71310	chr1	155243650	155245099	FALSE	Stable	3.19515	1.68288e-05	3.83253	7.44917e-05	0.146095	0.999993
71311	chr1	155356850	155356999	FALSE	other	-0.820893	0.247725	2.34059	0.00516135	-1.53342	0.999993
71312	chr1	155415900	155417199	FALSE	Stable	3.28037	1.13612e-05	3.43155	0.000171643	0.0477624	0.999993
71313	chr1	155557700	155558199	FALSE	Stable	2.58536	0.00032992	2.4695	0.00330577	-0.0481441	0.999993
71314	chr1	155558350	155559349	FALSE	Stable	3.33943	8.94105e-06	2.89202	0.000778928	0.085907	0.999993
71315	chr1	155559450	155559649	FALSE	Stable	2.36842	0.000946014	1.71785	0.0378779	0.514306	0.999993
71316	chr1	155741500	155742099	TRUE	Stable	2.68769	0.000198824	3.13068	0.000373927	-0.236854	0.999993
71317	chr1	155742250	155743349	TRUE	Stable	3.9355	7.6136e-07	3.15331	0.000349957	0.384952	0.999993
71318	chr1	155812000	155813399	FALSE	Stable	2.8545	8.74145e-05	2.53943	0.00258185	0.0378965	0.999993
71319	chr1	155971550	155971799	FALSE	other	0.82586	0.244919	2.50348	0.00293329	-1.09493	0.999993
71320	chr1	155972200	155973099	FALSE	Stable	3.19854	1.65632e-05	3.47032	0.000158582	0.192151	0.999993
71321	chr1	155973450	155974499	FALSE	Stable	2.85738	8.62032e-05	2.90272	0.000751614	0.106041	0.999993
71322	chr1	156034750	156035599	FALSE	Stable	2.27631	0.00145902	2.53303	0.00264083	-0.0207315	0.999993
71323	chr1	156035700	156036049	FALSE	Stable	2.7865	0.000121845	1.78481	0.0310787	0.182054	0.999993
71324	chr1	156036250	156037049	FALSE	Stable	2.78684	0.000121616	3.05856	0.000462916	-0.0572833	0.999993
71325	chr1	156041050	156041149	FALSE	Stable	2.21972	0.0018955	3.0887	0.000423705	0.0127279	0.999993
71326	chr1	156041200	156042099	FALSE	Stable	2.69438	0.00019234	2.76433	0.00118833	-0.0645248	0.999993
71327	chr1	156204500	156205349	FALSE	Stable	3.02483	3.79189e-05	2.9353	0.000677413	0.141315	0.999993
71328	chr1	156230650	156230799	FALSE	other	1.31188	0.0646877	2.0902	0.0119611	0.0587171	0.999993
71329	chr1	156302900	156303799	FALSE	Stable	3.78262	1.38533e-06	3.697	9.85964e-05	0.212823	0.999993
71330	chr1	156311050	156311249	FALSE	other	2.22874	0.00181621	0.869518	0.290452	0.370507	0.999993
71331	chr1	156420400	156420899	FALSE	Stable	1.84937	0.00940339	3.38456	0.000192449	-0.596177	0.999993
71332	chr1	156473050	156474299	FALSE	Stable	3.04109	3.50628e-05	3.10779	0.000401164	0.00583038	0.999993
71333	chr1	156474450	156474599	FALSE	other	2.35348	0.00101397	1.36524	0.0977073	0.324936	0.999993
71334	chr1	156558300	156558699	TRUE	Stable	3.13397	2.25434e-05	2.07088	0.01274	0.0978314	0.999993
71335	chr1	156559050	156559199	TRUE	other	2.50932	0.000479923	1.0318	0.209716	0.540444	0.999993
71336	chr1	156559300	156559999	FALSE	Stable	2.50683	0.000485484	3.00511	0.000545759	0.0148346	0.999993
71337	chr1	156614500	156614649	FALSE	other	3.23539	1.39855e-05	0.42423	0.606594	0.537285	0.999993
71338	chr1	156615900	156616299	FALSE	other	3.9511	7.15352e-07	0.745587	0.364845	0.682532	0.999993
71339	chr1	156673350	156674699	FALSE	Stable	3.0908	2.75859e-05	3.41166	0.000181093	0.080743	0.999993
71340	chr1	156674750	156674899	FALSE	Stable	2.23379	0.00177613	1.82067	0.0279061	0.276851	0.999993
71341	chr1	156717950	156718749	TRUE	Stable	3.2356	1.39855e-05	2.46436	0.00336393	-0.0695051	0.999993
71342	chr1	156719300	156719849	TRUE	Stable	2.79279	0.00011815	2.50622	0.00290458	0.355764	0.999993
71343	chr1	156752150	156752399	FALSE	Stable	1.55784	0.028417	2.6787	0.00159322	-0.293238	0.999993
71344	chr1	156752600	156753199	FALSE	Stable	2.13944	0.00272422	2.52713	0.00269685	0.0752157	0.999993
71345	chr1	156839000	156839099	TRUE	other	3.60816	2.83863e-06	0.263095	0.750386	0.228638	0.999993
71346	chr1	156839350	156839449	FALSE	other	1.72596	0.0152751	1.30213	0.114006	0.287563	0.999993
71347	chr1	156839850	156840099	FALSE	Stable	1.60007	0.0244169	3.75531	8.69133e-05	-0.730247	0.999993
71348	chr1	156847400	156847499	FALSE	other	0.703769	0.321815	-1.27293	0.122308	1.12782	0.999993
71349	chr1	156938150	156940349	TRUE	Stable	3.33322	9.16767e-06	3.25308	0.000266881	0.10932	0.999993
71350	chr1	157086100	157086699	FALSE	other	3.82635	1.15867e-06	1.50435	0.068332	-0.00443466	0.999993
71351	chr1	157411100	157412599	TRUE	Stable	3.54575	3.68061e-06	2.88266	0.000801101	0.142577	0.999993
71352	chr1	157412700	157413349	TRUE	Stable	3.0767	2.95091e-05	2.59569	0.00212117	0.209678	0.999993
71353	chr1	157440150	157440399	FALSE	Stable	2.51753	0.000461155	3.37821	0.000194988	-0.405836	0.999993
71354	chr1	157448800	157448899	FALSE	other	0.0968328	0.892852	1.98653	0.0167033	-1.04113	0.999993
71355	chr1	157449800	157450099	FALSE	Stable	2.49163	0.000523171	2.10815	0.0112844	-0.13473	0.999993
71356	chr1	157450150	157450449	FALSE	Stable	1.44667	0.0417391	2.65689	0.0017142	0.111008	0.999993
71357	chr1	157458700	157458949	FALSE	other	3.83235	1.13845e-06	0.969435	0.238425	0.21487	0.999993
71358	chr1	157554700	157554999	FALSE	Stable	2.09255	0.00336143	3.24702	0.000270644	-0.3059	0.999993
71359	chr1	158348650	158348799	FALSE	Stable	1.90245	0.0075675	2.56414	0.0023648	-0.661691	0.999993
71360	chr1	158355650	158356799	FALSE	Stable	3.10332	2.60505e-05	2.73647	0.00130573	0.14217	0.999993
71361	chr1	158362100	158362299	FALSE	Stable	3.05623	3.25853e-05	2.20199	0.00826019	0.0053556	0.999993
71362	chr1	158362500	158363099	FALSE	Stable	3.39098	7.07183e-06	2.99242	0.000567547	-0.215524	0.999993
71363	chr1	158381300	158381449	FALSE	other	1.44774	0.0415843	-1.72176	0.0374435	1.51635	0.999993
71364	chr1	158448300	158448399	FALSE	other	0.186582	0.794251	2.16065	0.00946747	-0.549079	0.999993
71365	chr1	158597550	158597649	FALSE	other	2.02053	0.0045967	1.49149	0.0706969	0.983876	0.999993
71366	chr1	158816750	158816849	FALSE	other	0.165395	0.816928	1.19351	0.147331	0.129452	0.999993
71367	chr1	159231450	159231899	TRUE	Stable	3.07905	2.91728e-05	2.46908	0.00331004	0.294645	0.999993
71368	chr1	159232300	159233649	TRUE	Stable	2.84055	9.35291e-05	2.36367	0.00477002	0.201126	0.999993
71369	chr1	159233800	159233899	FALSE	Stable	1.88592	0.00809767	2.43235	0.00375445	-0.0915955	0.999993
71370	chr1	160044050	160044849	FALSE	Stable	2.68456	0.0002018	2.98763	0.000575837	0.204012	0.999993
71371	chr1	160194500	160194799	FALSE	other	2.3451	0.00105537	1.55052	0.0604004	0.0602152	0.999993
71372	chr1	160194850	160194999	FALSE	Stable	2.03382	0.00433796	2.31105	0.00571638	-0.00353281	0.999993
71373	chr1	160195350	160196099	FALSE	Stable	3.4652	5.14137e-06	2.79303	0.00107992	0.236764	0.999993
71374	chr1	160210950	160212299	FALSE	Stable	2.63907	0.000252934	3.07353	0.00044324	0.144785	0.999993
71375	chr1	160213350	160213949	TRUE	Stable	3.01983	3.88125e-05	2.43795	0.00368523	-0.135068	0.999993
71376	chr1	160351550	160352399	FALSE	Stable	2.75656	0.000141365	1.91923	0.0206465	0.125758	0.999993
71377	chr1	160791450	160792899	TRUE	Stable	3.57349	3.26783e-06	3.15824	0.000344808	0.136441	0.999993
71378	chr1	160793200	160793549	TRUE	Stable	3.96861	6.78363e-07	2.51362	0.00282825	0.345112	0.999993
71379	chr1	160905850	160906349	FALSE	Stable	2.71273	0.000175338	2.68894	0.00153812	0.335374	0.999993
71380	chr1	160906500	160906699	FALSE	other	2.56935	0.000356835	0.336288	0.683411	0.013211	0.999993
71381	chr1	160907000	160907999	FALSE	Stable	3.0786	2.92308e-05	3.40731	0.000182846	0.184394	0.999993
71382	chr1	161033650	161034499	TRUE	Stable	3.11941	2.41644e-05	3.07834	0.000436917	-0.21586	0.999993
71383	chr1	161035650	161038099	FALSE	Stable	3.20586	1.60104e-05	3.48193	0.000154013	-0.110425	0.999993
71384	chr1	161038250	161038449	FALSE	other	1.96633	0.00579661	1.24419	0.130908	0.894861	0.999993
71385	chr1	161069750	161070649	FALSE	Stable	2.65262	0.000236558	3.79069	8.11602e-05	-0.204205	0.999993
71386	chr1	161071250	161073149	FALSE	Stable	2.72538	0.000164635	3.26982	0.000255803	-0.0554776	0.999993
71387	chr1	161130300	161131399	FALSE	Stable	3.23306	1.41362e-05	3.52959	0.00013857	-0.138359	0.999993
71388	chr1	161131650	161132099	FALSE	Stable	2.3695	0.00094159	3.00902	0.000539265	-0.12723	0.999993
71389	chr1	161142400	161143049	FALSE	Stable	2.87686	7.82885e-05	2.99881	0.000555887	-0.295005	0.999993
71390	chr1	161170500	161170699	FALSE	Stable	2.9403	5.72809e-05	2.5355	0.00261861	-0.125199	0.999993
71391	chr1	161170750	161170949	FALSE	Stable	1.64495	0.0206974	2.06815	0.0128511	-0.303036	0.999993
71392	chr1	161195600	161196449	FALSE	Stable	2.84089	9.34361e-05	2.26419	0.00669707	0.148664	0.999993
71393	chr1	161248700	161251049	FALSE	Stable	3.19345	1.69358e-05	2.8559	0.000876017	0.126338	0.999993
71394	chr1	161251250	161251649	FALSE	other	3.46989	5.04047e-06	1.50543	0.0681411	0.253414	0.999993
71395	chr1	161874800	161874949	FALSE	other	2.46628	0.000591615	1.19248	0.147663	-0.600282	0.999993
71396	chr1	161875100	161876399	FALSE	Stable	3.37588	7.58033e-06	3.45392	0.00016336	0.0148611	0.999993
71397	chr1	161877100	161877249	FALSE	other	1.24183	0.0803246	2.12409	0.0106981	-0.239032	0.999993
71398	chr1	161877300	161877899	FALSE	Stable	2.89637	7.11152e-05	2.92428	0.000701568	0.119937	0.999993
71399	chr1	161968700	161969049	FALSE	Stable	2.85749	8.61607e-05	1.62772	0.0489217	0.513625	0.999993
71400	chr1	161969350	161969999	FALSE	Stable	3.31623	9.8067e-06	2.8704	0.000833529	-0.111035	0.999993
71401	chr1	161982900	161982999	FALSE	other	-1.20222	0.0903829	2.1928	0.00851487	-1.76695	0.662074
71402	chr1	161985150	161985249	FALSE	other	1.84138	0.00970693	0.612585	0.456425	0.155517	0.999993
71403	chr1	162017550	162017749	FALSE	Stable	1.60777	0.0237391	2.20265	0.00824246	0.458311	0.999993
71404	chr1	162075500	162075649	FALSE	Stable	1.96624	0.00579816	2.6493	0.00175892	0.165508	0.999993
71405	chr1	162207500	162207699	FALSE	Stable	2.79581	0.000116446	2.54244	0.00255379	-0.409945	0.999993
71406	chr1	162207900	162208099	FALSE	Stable	1.84778	0.00946094	2.86805	0.000839946	-0.171697	0.999993
71407	chr1	162217200	162217449	TRUE	other	2.57829	0.000341046	1.21364	0.140653	0.957494	0.999993
71408	chr1	162218100	162218599	FALSE	Stable	1.56185	0.0280085	5.08198	1.2398e-06	0.0592108	0.999993
71409	chr1	162219350	162219499	FALSE	Stable	2.72645	0.000163962	2.27287	0.00650374	-0.209739	0.999993
71410	chr1	162219750	162222849	FALSE	Stable	3.08	2.90827e-05	2.67005	0.00164046	0.0576742	0.999993
71411	chr1	162223150	162223249	FALSE	other	1.81021	0.0109954	1.53074	0.0636477	-0.569407	0.999993
71412	chr1	162476650	162476749	FALSE	other	1.59855	0.0245445	1.29184	0.116852	-0.223295	0.999993
71413	chr1	162477200	162478199	FALSE	Stable	3.72729	1.74213e-06	3.31065	0.000230321	0.096619	0.999993
71414	chr1	162547200	162548499	FALSE	Stable	3.86916	9.82382e-07	3.41522	0.000179263	0.160475	0.999993
71415	chr1	162548650	162549149	FALSE	Stable	2.74704	0.00014812	2.80083	0.00105207	0.0385694	0.999993
71416	chr1	162569950	162570349	TRUE	Stable	2.95286	5.37631e-05	2.99605	0.000560913	0.561118	0.999993
71417	chr1	162570700	162571849	TRUE	Stable	3.04276	3.47499e-05	3.28268	0.000247326	0.0452681	0.999993
71418	chr1	162665500	162665749	FALSE	Stable	2.52109	0.000452914	2.23876	0.00728819	-0.0914042	0.999993
71419	chr1	162665850	162666049	FALSE	Stable	2.16105	0.00247217	2.77199	0.00115726	-0.43822	0.999993
71420	chr1	162738600	162739899	FALSE	Stable	3.06134	3.18542e-05	2.83607	0.000936529	-0.0568219	0.999993
71421	chr1	162739950	162740099	FALSE	Stable	2.23041	0.00180314	1.89634	0.0221493	-0.603015	0.999993
71422	chr1	162832250	162832449	FALSE	other	3.44616	5.58536e-06	0.102832	0.901226	0.580201	0.999993
71423	chr1	163238750	163238899	TRUE	other	-0.0588433	0.934509	2.11563	0.0110022	-0.35846	0.999993
71424	chr1	163307150	163309199	TRUE	Stable	2.97414	4.85572e-05	3.29697	0.000239387	-0.310799	0.999993
71425	chr1	163309350	163310599	TRUE	Stable	3.25882	1.25308e-05	2.53101	0.00266035	0.0801307	0.999993
71426	chr1	163310650	163311549	FALSE	Stable	3.06511	3.12381e-05	2.49695	0.00300076	0.475091	0.999993
71427	chr1	163312000	163312299	FALSE	Stable	2.10263	0.00321186	1.80708	0.0290646	-0.0347186	0.999993
71428	chr1	163312800	163313499	TRUE	Stable	3.22727	1.44775e-05	2.26532	0.00666996	0.347869	0.999993
71429	chr1	163313650	163314649	TRUE	Stable	3.49962	4.43844e-06	2.52194	0.00274629	0.260721	0.999993
71430	chr1	163315000	163315549	TRUE	Stable	2.78353	0.000123613	2.37457	0.00459302	0.000705299	0.999993
71431	chr1	163358400	163359399	TRUE	Stable	2.40552	0.000792252	3.24129	0.000275464	-0.392412	0.999993
71432	chr1	163402500	163403399	TRUE	Stable	2.69057	0.000195993	2.8885	0.000787413	-0.256388	0.999993
71433	chr1	163403500	163403649	TRUE	Stable	2.53801	0.00041679	1.67239	0.0431242	0.729346	0.999993
71434	chr1	163403900	163404099	TRUE	Stable	1.78625	0.0120825	2.06621	0.0129306	0.324348	0.999993
71435	chr1	163443800	163444049	FALSE	Stable	2.34073	0.00107814	2.42966	0.00378845	0.083788	0.999993
71436	chr1	163444550	163444799	FALSE	other	2.74558	0.000149197	1.25886	0.126501	-0.0356427	0.999993
71437	chr1	163574700	163574899	FALSE	other	2.89362	7.21096e-05	1.56433	0.0581572	0.480409	0.999993
71438	chr1	163779700	163780449	TRUE	Stable	2.73345	0.000158631	3.4941	0.000149213	0.259694	0.999993
71439	chr1	163853550	163853649	FALSE	other	0.00104184	0.998862	2.01877	0.0150639	-0.860162	0.999993
71440	chr1	163898600	163898749	FALSE	other	2.04299	0.00417221	1.05134	0.201361	0.275502	0.999993
71441	chr1	163907200	163907399	FALSE	other	0.496935	0.485187	2.20995	0.00804244	-0.47188	0.999993
71442	chr1	163929300	163929799	FALSE	Stable	2.28114	0.00142674	3.44005	0.000168642	-0.0726669	0.999993
71443	chr1	163930100	163931099	FALSE	Stable	3.24553	1.33332e-05	3.54584	0.000133743	-0.0193345	0.999993
71444	chr1	163993750	163994649	FALSE	Stable	2.71075	0.000177173	3.34575	0.000211736	-0.197573	0.999993
71445	chr1	163994950	163995649	FALSE	Stable	2.66368	0.000224016	2.39641	0.00425213	0.0919321	0.999993
71446	chr1	164224550	164224949	FALSE	other	2.79648	0.000116072	1.39224	0.0912837	0.886025	0.999993
71447	chr1	164248000	164248799	FALSE	Stable	3.40625	6.6363e-06	2.67301	0.00162519	0.356466	0.999993
71448	chr1	164249150	164250099	FALSE	Stable	3.27322	1.17274e-05	3.00762	0.000541483	0.0859314	0.999993
71449	chr1	164275400	164276249	FALSE	Stable	3.22878	1.43888e-05	2.7639	0.00118981	0.156921	0.999993
71450	chr1	164306350	164307349	FALSE	Stable	3.05929	3.21378e-05	3.04001	0.000489317	-0.157692	0.999993
71451	chr1	164307700	164308449	FALSE	Stable	3.92934	7.78823e-07	3.01059	0.000536463	-0.072343	0.999993
71452	chr1	164457300	164458899	FALSE	Stable	3.87475	9.70282e-07	3.39465	0.000188427	0.00775473	0.999993
71453	chr1	164779150	164779249	FALSE	other	-1.18184	0.0959977	2.51608	0.00280282	-0.911756	0.999993
71454	chr1	164898900	164899699	FALSE	Stable	2.5066	0.000485979	3.36841	0.000200156	0.0487868	0.999993
71455	chr1	165018900	165019149	FALSE	Stable	2.11969	0.00297671	3.1712	0.000333633	-0.596666	0.999993
71456	chr1	165092050	165092199	FALSE	other	-0.00742671	0.99182	2.11855	0.0109014	-0.497913	0.999993
71457	chr1	165193600	165194949	FALSE	Stable	3.52168	4.0563e-06	3.26524	0.00025873	0.169085	0.999993
71458	chr1	165235650	165236749	FALSE	Stable	2.75951	0.000139386	3.23044	0.000283628	0.00692828	0.999993
71459	chr1	165237000	165237749	FALSE	Stable	3.25619	1.26771e-05	3.02516	0.000513296	0.137952	0.999993
71460	chr1	165280950	165281849	FALSE	Stable	3.13466	2.24626e-05	3.05754	0.000464245	0.0712823	0.999993
71461	chr1	165282100	165283249	FALSE	Stable	3.35404	8.40835e-06	3.10774	0.000401164	0.0112732	0.999993
71462	chr1	165459100	165460949	TRUE	Stable	3.63246	2.58683e-06	2.82654	0.00096605	0.149073	0.999993
71463	chr1	165461400	165461949	FALSE	Stable	3.1913	1.71168e-05	3.5381	0.000135828	-0.106957	0.999993
71464	chr1	165633200	165634049	FALSE	Stable	2.99604	4.36189e-05	3.51655	0.000142618	0.436226	0.999993
71465	chr1	165634700	165635449	FALSE	Stable	3.23442	1.40409e-05	2.67686	0.00160467	0.193376	0.999993
71466	chr1	165641400	165641549	FALSE	other	2.52462	0.000445058	1.11264	0.176389	0.748676	0.999993
71467	chr1	165642100	165642299	FALSE	Stable	1.73875	0.0145565	4.38466	1.55403e-05	-0.827184	0.999993
71468	chr1	165642550	165643199	FALSE	Stable	2.77357	0.000130042	2.94124	0.000663994	-0.182606	0.999993
71469	chr1	165702000	165702199	FALSE	other	2.62343	0.000272978	0.87571	0.287074	0.810645	0.999993
71470	chr1	165702450	165703199	FALSE	Stable	2.09599	0.00330979	2.79126	0.00108539	-0.0823083	0.999993
71471	chr1	165707500	165708699	FALSE	Stable	3.15272	2.06471e-05	3.22823	0.000284757	0.0330499	0.999993
71472	chr1	165763800	165764599	FALSE	Stable	2.81045	0.000108294	3.37328	0.000197468	0.102736	0.999993
71473	chr1	165780350	165780899	FALSE	Stable	2.15086	0.00258856	2.90471	0.000747716	0.327405	0.999993
71474	chr1	165786250	165786599	FALSE	Stable	1.94099	0.00644901	2.41091	0.0040455	0.0423814	0.999993
71475	chr1	165840700	165841349	FALSE	Stable	2.88504	7.51712e-05	2.41264	0.00402475	-0.00643185	0.999993
71476	chr1	165844350	165845699	FALSE	Stable	3.53872	3.77994e-06	3.07495	0.000441525	0.0860592	0.999993
71477	chr1	166000550	166001999	FALSE	Stable	3.12781	2.3193e-05	3.07504	0.000441525	0.182493	0.999993
71478	chr1	166003100	166003649	TRUE	Stable	2.72826	0.000162661	2.89249	0.0007777	0.128597	0.999993
71479	chr1	166045350	166045449	FALSE	Stable	1.4037	0.0481586	1.62614	0.0491248	0.360249	0.999993
71480	chr1	166045850	166046099	FALSE	other	2.54573	0.000401098	1.31711	0.109943	0.0885886	0.999993
71481	chr1	166047300	166049299	TRUE	Stable	3.5116	4.22417e-06	2.9056	0.000745692	0.0888188	0.999993
71482	chr1	166253750	166254849	FALSE	Stable	4.38008	1.22377e-07	2.86758	0.000841358	-0.0232466	0.999993
71483	chr1	166282400	166283199	TRUE	Stable	2.64124	0.000250333	1.97229	0.0174751	-0.0553404	0.999993
71484	chr1	166308650	166309699	FALSE	Stable	3.29676	1.06087e-05	3.32318	0.000223714	0.132822	0.999993
71485	chr1	166378750	166380349	FALSE	Stable	3.49469	4.55414e-06	2.06807	0.012853	0.643995	0.999993
71486	chr1	166380500	166380649	FALSE	other	2.76137	0.000138107	1.42718	0.0835293	-0.318963	0.999993
71487	chr1	166380700	166380899	FALSE	other	0.904874	0.202766	3.09638	0.000414587	-0.209235	0.999993
71488	chr1	166408800	166410249	FALSE	Stable	3.40946	6.5458e-06	2.70077	0.00147822	0.16719	0.999993
71489	chr1	166948350	166948499	FALSE	other	2.3377	0.00109334	0.85733	0.297241	0.764224	0.999993
71490	chr1	167000400	167000749	TRUE	Stable	2.71081	0.000177118	2.71465	0.00140805	0.423227	0.999993
71491	chr1	167000800	167002349	TRUE	Stable	3.61741	2.74892e-06	3.41258	0.000180591	-0.0198488	0.999993
71492	chr1	167002600	167002699	FALSE	other	0.475787	0.503898	1.26356	0.125092	-0.514074	0.999993
71493	chr1	167283250	167285149	TRUE	Stable	2.74119	0.000152516	3.18464	0.000321394	-0.028317	0.999993
71494	chr1	167285250	167285799	TRUE	Stable	2.31831	0.001198	3.2745	0.000252254	-0.216524	0.999993
71495	chr1	167307950	167308149	FALSE	other	2.00778	0.0048534	1.26356	0.125092	1.01792	0.999993
71496	chr1	167308250	167308499	FALSE	Stable	2.41547	0.000755411	2.39086	0.00433593	-0.00654704	0.999993
71497	chr1	167308800	167309449	FALSE	Stable	2.86925	8.13336e-05	3.84017	7.36489e-05	0.13714	0.999993
71498	chr1	167340500	167340849	FALSE	Stable	2.82109	0.000102959	2.88714	0.00079041	-0.23005	0.999993
71499	chr1	167350000	167351049	TRUE	Stable	3.27628	1.15781e-05	3.11284	0.000395106	-0.0157136	0.999993
71500	chr1	167392950	167394449	TRUE	Stable	3.2441	1.34281e-05	3.58733	0.000122448	0.153353	0.999993
71501	chr1	167498650	167498949	TRUE	Stable	2.66848	0.000218682	2.21882	0.00780648	-0.399219	0.999993
71502	chr1	167597950	167599199	FALSE	Stable	2.74912	0.000146553	3.30971	0.000230975	0.0229545	0.999993
71503	chr1	167660650	167660999	FALSE	Stable	2.78115	0.000125116	2.68494	0.00155896	-0.310935	0.999993
71504	chr1	167688350	167689199	FALSE	Stable	4.20613	2.69872e-07	3.42644	0.000173666	0.165617	0.999993
71505	chr1	167754750	167754899	FALSE	other	0.454127	0.523357	3.51312	0.000143453	-0.676933	0.999993
71506	chr1	167802400	167802499	FALSE	other	2.21874	0.00190367	0.0703576	0.932732	0.817569	0.999993
71507	chr1	167802600	167803599	FALSE	Stable	3.36737	7.91155e-06	2.96199	0.000622011	0.0619613	0.999993
71508	chr1	167929650	167930249	FALSE	Stable	3.41706	6.33905e-06	2.64207	0.00180348	0.0258154	0.999993
71509	chr1	168357850	168358049	FALSE	Stable	2.88807	7.40182e-05	1.71209	0.0384972	0.512666	0.999993
71510	chr1	168382650	168382749	FALSE	Stable	1.65796	0.0197258	3.4354	0.000169854	-0.89572	0.999993
71511	chr1	168391800	168392049	TRUE	Stable	2.80571	0.00011092	3.16264	0.000340934	-0.0832393	0.999993
71512	chr1	168392200	168392349	TRUE	other	0.821995	0.247142	1.8345	0.0267668	0.228638	0.999993
71513	chr1	168392600	168392749	TRUE	Stable	2.06376	0.00380907	2.08649	0.012108	-0.142764	0.999993
71514	chr1	168425250	168425499	FALSE	Stable	3.2286	1.43953e-05	2.03597	0.0142631	0.662629	0.999993
71515	chr1	168425600	168425899	FALSE	other	2.51729	0.000461647	1.27028	0.123093	-0.0299615	0.999993
71516	chr1	168426150	168427299	FALSE	Stable	1.86448	0.00884409	3.50632	0.000145599	-0.33082	0.999993
71517	chr1	168427350	168427799	FALSE	Stable	2.65814	0.000230078	2.29907	0.0059548	-0.12252	0.999993
71518	chr1	168427900	168429099	FALSE	Stable	3.04541	3.43058e-05	2.94938	0.000646638	0.0149673	0.999993
71519	chr1	168429300	168430999	FALSE	Stable	2.75304	0.000143691	2.84717	0.000902731	0.111618	0.999993
71520	chr1	168432650	168433149	TRUE	Stable	3.16992	1.89751e-05	1.83014	0.0271212	0.454093	0.999993
71521	chr1	168708250	168708499	FALSE	Stable	2.76051	0.000138678	2.82608	0.000966969	-0.154008	0.999993
71522	chr1	168708650	168708849	FALSE	Stable	3.02506	3.78729e-05	2.54297	0.00254892	-0.48806	0.999993
71523	chr1	168708950	168709199	FALSE	Stable	2.72599	0.000164162	2.73455	0.00131418	-0.0969959	0.999993
71524	chr1	168753550	168754149	TRUE	Stable	2.56673	0.000361704	3.42409	0.000174932	-0.214135	0.999993
71525	chr1	168754350	168754449	TRUE	other	2.14335	0.00267659	0.614753	0.454834	0.13644	0.999993
71526	chr1	169155150	169155349	FALSE	other	0.990609	0.162965	2.73703	0.001303	-0.118355	0.999993
71527	chr1	169238900	169239149	TRUE	Stable	1.84489	0.0095705	2.75246	0.00123738	-0.324873	0.999993
71528	chr1	169367900	169368049	FALSE	other	1.13624	0.109561	2.17648	0.00898949	0.117325	0.999993
71529	chr1	169530350	169530999	FALSE	Stable	2.96793	5.00086e-05	2.32182	0.00550572	0.352931	0.999993
71530	chr1	169531150	169531349	FALSE	Stable	2.02016	0.00460331	2.7029	0.00146726	-0.100057	0.999993
71531	chr1	169531600	169532249	FALSE	Stable	3.81763	1.20437e-06	3.82586	7.57568e-05	-0.172233	0.999993
71532	chr1	169655050	169655199	FALSE	Stable	1.71233	0.0160898	1.67652	0.042617	0.208538	0.999993
71533	chr1	169655300	169655549	FALSE	Stable	2.95584	5.30125e-05	3.14556	0.000358186	0.0839811	0.999993
71534	chr1	169747300	169747949	FALSE	Stable	3.10884	2.5372e-05	2.73474	0.00131339	-0.524145	0.999993
71535	chr1	169968250	169969149	FALSE	Stable	3.23528	1.3991e-05	2.77705	0.00113777	-0.0368443	0.999993
71536	chr1	169969400	169970499	FALSE	Stable	2.85952	8.5384e-05	3.51228	0.000143703	-0.242906	0.999993
71537	chr1	170109050	170110799	TRUE	Stable	2.45738	0.000617246	2.87443	0.00082207	0.0667321	0.999993
71538	chr1	170111050	170111499	TRUE	Stable	3.13696	2.2206e-05	2.02626	0.0147146	0.367103	0.999993
71539	chr1	170173950	170174749	FALSE	Stable	3.19905	1.65237e-05	4.33254	1.8961e-05	-0.0332082	0.999993
71540	chr1	170175100	170175849	FALSE	Stable	3.75209	1.57772e-06	2.60521	0.00205171	0.192631	0.999993
71541	chr1	170214100	170215299	FALSE	Stable	2.83758	9.48262e-05	2.30981	0.00574187	0.210537	0.999993
71542	chr1	170215450	170215799	FALSE	other	4.32131	1.56765e-07	1.52681	0.0643166	0.0387014	0.999993
71543	chr1	170255050	170255499	FALSE	Stable	2.78151	0.000124896	2.41793	0.00394759	0.217423	0.999993
71544	chr1	170588900	170590399	FALSE	Stable	3.67835	2.1493e-06	3.23962	0.000276542	0.294661	0.999993
71545	chr1	170643850	170644449	FALSE	Stable	2.73218	0.00015955	2.27002	0.0065644	-0.0715183	0.999993
71546	chr1	170644500	170644999	FALSE	Stable	3.22292	1.47666e-05	2.78089	0.00112464	0.271068	0.999993
71547	chr1	170866850	170868599	TRUE	Stable	3.06554	3.11798e-05	3.48553	0.000152438	0.019038	0.999993
71548	chr1	170868750	170869149	FALSE	Stable	1.98789	0.00529086	3.07116	0.000446105	-0.478956	0.999993
71549	chr1	170884350	170885049	FALSE	Stable	2.67204	0.000214847	3.13849	0.000366088	0.286809	0.999993
71550	chr1	170907400	170908849	FALSE	Stable	3.80056	1.30048e-06	3.18871	0.000317321	0.17473	0.999993
71551	chr1	170998450	170999099	FALSE	Stable	1.69715	0.0170405	2.96337	0.000619086	-0.442684	0.999993
71552	chr1	171032700	171034999	FALSE	Stable	3.33021	9.29758e-06	3.66686	0.000105399	0.142507	0.999993
71553	chr1	171036600	171038649	FALSE	Stable	3.22651	1.45277e-05	2.80762	0.00102857	0.0100459	0.999993
71554	chr1	171039250	171039349	FALSE	other	2.77328	0.000130141	0.999509	0.224308	-0.100317	0.999993
71555	chr1	171044150	171044299	FALSE	other	2.13911	0.00272815	1.60399	0.0522064	0.388965	0.999993
71556	chr1	171045200	171045699	FALSE	Stable	2.79434	0.000117214	2.82355	0.000975419	0.0341429	0.999993
71557	chr1	171064600	171065999	FALSE	Stable	2.93535	5.85886e-05	2.17374	0.00907277	0.416945	0.999993
71558	chr1	171070350	171070849	FALSE	other	2.21496	0.00193631	1.58882	0.0544121	0.0608151	0.999993
71559	chr1	171072000	171073649	FALSE	Stable	2.74651	0.000148507	2.22953	0.00752918	0.262079	0.999993
71560	chr1	171079700	171081249	FALSE	Stable	2.91441	6.49864e-05	2.17604	0.00900194	0.311562	0.999993
71561	chr1	171085600	171086349	FALSE	Stable	2.13465	0.00278508	2.94362	0.000658278	-0.345026	0.999993
71562	chr1	171088650	171089049	FALSE	Stable	2.34056	0.00107889	3.36238	0.000203618	0.0313717	0.999993
71563	chr1	171101850	171102649	FALSE	Stable	2.54821	0.000396421	3.01821	0.000523473	0.173249	0.999993
71564	chr1	171103000	171103599	FALSE	Stable	2.48403	0.00054276	2.68734	0.00154664	0.329676	0.999993
71565	chr1	171110600	171111299	FALSE	Stable	2.576	0.00034507	2.5397	0.00257903	-0.135785	0.999993
71566	chr1	171111550	171112299	FALSE	Stable	3.15299	2.06221e-05	2.77522	0.00114449	0.116621	0.999993
71567	chr1	171113650	171114349	FALSE	Stable	2.73054	0.000160722	2.98616	0.000578615	0.242726	0.999993
71568	chr1	171149650	171151349	TRUE	Stable	2.8326	9.7178e-05	3.76367	8.60086e-05	0.022653	0.999993
71569	chr1	171160000	171160149	FALSE	Stable	1.88314	0.00818959	2.10172	0.0115314	0.424642	0.999993
71570	chr1	171195550	171196399	FALSE	Stable	3.34316	8.79024e-06	3.46193	0.000161631	0.0956638	0.999993
71571	chr1	171221450	171222249	FALSE	Stable	3.74528	1.63234e-06	3.09614	0.000414838	0.197721	0.999993
71572	chr1	171230700	171230799	FALSE	other	0.458715	0.519158	1.98653	0.0167033	-0.115905	0.999993
71573	chr1	171246500	171246999	TRUE	Stable	2.70017	0.000186773	2.42748	0.00381866	0.100602	0.999993
71574	chr1	171247300	171247749	TRUE	Stable	2.69	0.000196524	2.32061	0.00552944	-0.0073941	0.999993
71575	chr1	171250550	171251999	FALSE	Stable	2.91348	6.52781e-05	2.5794	0.00224355	0.108202	0.999993
71576	chr1	171252050	171252299	FALSE	other	2.67892	0.000207674	1.14982	0.162586	0.389074	0.999993
71577	chr1	171269900	171270249	FALSE	Stable	2.98782	4.54721e-05	2.04486	0.0138707	0.293026	0.999993
71578	chr1	171270500	171271449	FALSE	Stable	3.3582	8.25425e-06	3.05289	0.000470758	0.127497	0.999993
71579	chr1	171280150	171281199	FALSE	Stable	3.4273	6.05083e-06	3.4004	0.000185658	0.0695028	0.999993
71580	chr1	171281400	171281949	FALSE	Stable	2.95181	5.40185e-05	2.25216	0.00697684	0.0423372	0.999993
71581	chr1	171287050	171287749	FALSE	Stable	2.75799	0.00014047	2.05749	0.0133061	0.129413	0.999993
71582	chr1	171293550	171293949	FALSE	Stable	1.99571	0.00511429	2.99428	0.000564126	-0.296851	0.999993
71583	chr1	171294000	171294499	FALSE	Stable	3.43316	5.90289e-06	3.0046	0.000546517	-0.0237054	0.999993
71584	chr1	171294750	171295299	FALSE	Stable	3.02942	3.70835e-05	2.08028	0.0123551	0.205542	0.999993
71585	chr1	171320200	171320399	FALSE	other	2.66439	0.000223289	-0.290267	0.725124	1.65695	0.896094
71586	chr1	171327650	171327749	FALSE	other	1.61296	0.0232949	0.187773	0.820538	0.576309	0.999993
71587	chr1	171328150	171329399	TRUE	Stable	3.27309	1.17331e-05	3.00653	0.000543436	0.0883664	0.999993
71588	chr1	171329700	171329949	TRUE	Stable	3.78984	1.34954e-06	2.58618	0.00219124	1.20365	0.999993
71589	chr1	171330000	171331099	TRUE	Stable	3.83133	1.14156e-06	3.09624	0.000414775	0.283674	0.999993
71590	chr1	171344650	171345599	FALSE	Stable	2.89442	7.18104e-05	3.60453	0.000117327	-0.0153854	0.999993
71591	chr1	171345850	171346549	FALSE	Stable	3.59977	2.93531e-06	2.6826	0.0015713	0.0126067	0.999993
71592	chr1	171360000	171361299	FALSE	Stable	3.21811	1.51234e-05	2.81223	0.00101354	0.180007	0.999993
71593	chr1	171411450	171411549	FALSE	Stable	1.67045	0.0188288	2.84167	0.000919664	0.240691	0.999993
71594	chr1	171411850	171412899	FALSE	Stable	2.64201	0.000249375	3.12109	0.000384685	0.0913348	0.999993
71595	chr1	171437350	171438349	FALSE	Stable	3.15656	2.02575e-05	3.10475	0.000404627	-0.0463038	0.999993
71596	chr1	171478100	171478249	FALSE	Stable	2.62322	0.000273225	2.01239	0.0153837	0.155684	0.999993
71597	chr1	171478350	171478499	FALSE	other	2.54762	0.000397503	0.375395	0.648964	1.06235	0.999993
71598	chr1	171503100	171503299	TRUE	other	1.31696	0.0636634	2.91063	0.000733854	-0.436107	0.999993
71599	chr1	171503550	171504599	TRUE	Stable	3.56285	3.42704e-06	2.95806	0.000630049	0.311317	0.999993
71600	chr1	172025350	172025449	FALSE	Stable	2.07186	0.00367657	2.25978	0.00679333	-0.276354	0.999993
71601	chr1	172025850	172027299	FALSE	Stable	2.57945	0.000339308	2.66064	0.00169221	0.0492799	0.999993
71602	chr1	172027500	172028049	FALSE	Stable	2.87246	8.00103e-05	2.20064	0.00829219	0.156985	0.999993
71603	chr1	172053900	172054249	FALSE	Stable	2.46177	0.000604068	1.94044	0.0193332	-0.0657343	0.999993
71604	chr1	172081750	172082649	FALSE	Stable	2.02188	0.00457252	3.03182	0.00050294	-0.115102	0.999993
71605	chr1	172082900	172083749	FALSE	Stable	2.96341	5.11732e-05	2.89917	0.000760687	-0.110429	0.999993
71606	chr1	172126200	172126549	FALSE	Stable	1.70452	0.0165635	2.37794	0.00453937	-0.831007	0.999993
71607	chr1	172126850	172128049	FALSE	Stable	2.91712	6.40882e-05	3.34078	0.000214713	0.0632778	0.999993
71608	chr1	172147300	172147849	TRUE	Stable	3.47047	5.03222e-06	1.77067	0.0324023	0.231194	0.999993
71609	chr1	172148250	172148449	TRUE	Stable	2.64325	0.000247854	1.93288	0.019788	0.0822869	0.999993
71610	chr1	172148800	172149749	FALSE	Stable	3.15185	2.07272e-05	2.91502	0.000722781	0.196641	0.999993
71611	chr1	172149900	172150199	FALSE	Stable	2.78911	0.000120236	3.7032	9.83448e-05	-0.0655202	0.999993
71612	chr1	172205950	172206749	FALSE	Stable	3.20037	1.64306e-05	2.75609	0.00122169	0.0911301	0.999993
71613	chr1	172217050	172217299	FALSE	other	2.39231	0.000844005	0.805825	0.327212	0.870337	0.999993
71614	chr1	172310000	172310249	FALSE	Stable	2.63969	0.000252138	1.67558	0.0427355	0.633846	0.999993
71615	chr1	172311450	172313199	FALSE	Stable	3.34051	8.89291e-06	3.15268	0.000350752	0.136058	0.999993
71616	chr1	172326100	172326649	FALSE	Stable	2.38274	0.000883655	2.71693	0.00139772	-0.0966564	0.999993
71617	chr1	172340650	172341049	FALSE	Stable	2.17175	0.00235834	2.76822	0.00117273	-0.352788	0.999993
71618	chr1	172341100	172341299	FALSE	Stable	2.58772	0.000326322	3.65615	0.000108094	-0.219863	0.999993
71619	chr1	172372400	172372499	FALSE	other	-0.0213646	0.976114	3.06974	0.000447961	-2.20939	0.157081
71620	chr1	172375900	172376349	FALSE	Stable	2.78703	0.000121485	2.54809	0.00250395	-0.213328	0.999993
71621	chr1	172376700	172377749	FALSE	Stable	3.02031	3.87124e-05	2.84189	0.000919055	0.130787	0.999993
71622	chr1	172392100	172392349	FALSE	other	1.00176	0.158284	3.46489	0.00016064	-0.534275	0.999993
71623	chr1	172481550	172482149	FALSE	Stable	2.79873	0.000114707	2.52997	0.00267003	-0.0954188	0.999993
71624	chr1	172482300	172483599	FALSE	Stable	3.46337	5.18974e-06	2.77535	0.00114403	0.374311	0.999993
71625	chr1	172500050	172501049	TRUE	Stable	3.02149	3.84883e-05	3.12263	0.000382843	0.277828	0.999993
71626	chr1	172501150	172501349	FALSE	other	2.85377	8.76654e-05	0.790718	0.336466	0.670894	0.999993
71627	chr1	172520900	172521299	FALSE	Stable	2.18927	0.00217968	2.54521	0.00253103	0.124841	0.999993
71628	chr1	172562150	172562249	FALSE	Stable	2.08452	0.00348001	1.98362	0.0168622	-0.0353662	0.999993
71629	chr1	172562450	172563799	FALSE	Stable	3.03057	3.69426e-05	3.19563	0.000311237	0.088258	0.999993
71630	chr1	172616950	172617649	FALSE	other	2.99903	4.2954e-05	1.4184	0.0854276	0.749904	0.999993
71631	chr1	172632500	172633099	TRUE	Stable	2.95048	5.43438e-05	3.39133	0.000189546	0.0220701	0.999993
71632	chr1	173350250	173350599	FALSE	Stable	2.29704	0.00132479	3.25336	0.000266854	0.0411166	0.999993
71633	chr1	173366750	173368099	FALSE	Stable	3.34673	8.66667e-06	2.94421	0.000657149	-0.0698345	0.999993
71634	chr1	173389800	173389999	FALSE	Stable	2.25416	0.0016166	3.50571	0.000145794	-0.0939828	0.999993
71635	chr1	174501550	174503749	FALSE	Stable	3.23085	1.42707e-05	3.623	0.000113592	0.0186789	0.999993
71636	chr1	174921250	174922099	FALSE	Stable	2.84249	9.2715e-05	2.52781	0.0026902	0.221607	0.999993
71637	chr1	175491800	175492949	FALSE	Stable	3.94219	7.37811e-07	4.05678	4.36721e-05	-0.0809326	0.999993
71638	chr1	175493050	175493249	FALSE	Stable	3.13347	2.25859e-05	2.03918	0.0141172	0.0210132	0.999993
71639	chr1	175624500	175625549	FALSE	Stable	3.68623	2.074e-06	2.92952	0.000688931	0.0855967	0.999993
71640	chr1	175625850	175626149	FALSE	other	2.09177	0.00337246	1.55052	0.0604004	0.0230394	0.999993
71641	chr1	175690550	175690749	FALSE	Stable	1.6918	0.017386	3.23198	0.000282458	0.278545	0.999993
71642	chr1	175691050	175691149	FALSE	other	2.05593	0.00394176	-0.0394854	0.962305	1.02214	0.999993
71643	chr1	175691400	175692599	FALSE	Stable	3.5785	3.20701e-06	2.87141	0.000830456	0.160248	0.999993
71644	chr1	175693000	175693449	FALSE	Stable	1.62966	0.0219182	3.01534	0.000528438	0.0943554	0.999993
71645	chr1	175880300	175880599	FALSE	other	1.97635	0.00555735	1.20696	0.14282	0.287807	0.999993
71646	chr1	175880850	175881649	FALSE	Stable	3.53126	3.90266e-06	3.19557	0.000311237	0.00542132	0.999993
71647	chr1	176274650	176275999	FALSE	Stable	3.21778	1.51451e-05	3.46264	0.00016141	0.00815226	0.999993
71648	chr1	176812350	176813449	FALSE	Stable	2.81217	0.000107413	3.11423	0.000393744	0.310907	0.999993
71649	chr1	176813600	176813899	TRUE	other	1.10797	0.118705	3.30064	0.000236713	-0.785275	0.999993
71650	chr1	176814450	176814649	TRUE	Stable	1.92031	0.00702355	2.49996	0.0029697	0.063581	0.999993
71651	chr1	176814950	176815399	FALSE	Stable	2.81916	0.000103901	2.42758	0.00381743	0.0883773	0.999993
71652	chr1	176835350	176836199	FALSE	Stable	3.41886	6.29107e-06	3.51693	0.000142538	0.0466121	0.999993
71653	chr1	176994800	176994999	FALSE	other	0.758517	0.285665	2.98442	0.000580928	-0.409887	0.999993
71654	chr1	177068050	177068149	FALSE	Stable	2.70543	0.000181901	1.65301	0.0455576	1.05242	0.999993
71655	chr1	177256850	177257599	FALSE	Stable	2.58099	0.000336828	3.2493	0.000269749	-0.0363223	0.999993
71656	chr1	177258550	177259549	TRUE	Stable	3.7167	1.82556e-06	3.38872	0.000190933	-0.0487963	0.999993
71657	chr1	177322400	177323399	FALSE	Stable	3.40117	6.77907e-06	3.14752	0.000356552	0.143216	0.999993
71658	chr1	177338650	177339349	FALSE	Stable	2.64303	0.000248148	3.07314	0.000443653	-0.122827	0.999993
71659	chr1	177440950	177441899	FALSE	Stable	3.37969	7.43616e-06	3.47306	0.000157164	0.0513158	0.999993
71660	chr1	177442850	177444249	FALSE	Stable	3.43052	5.9669e-06	3.12962	0.000374856	0.122044	0.999993
71661	chr1	177518500	177519149	TRUE	Stable	2.71864	0.00017014	2.42981	0.00378693	0.244244	0.999993
71662	chr1	177639700	177639899	FALSE	other	2.05708	0.00392259	1.0493	0.202221	-0.384381	0.999993
71663	chr1	177702600	177702999	FALSE	Stable	2.41212	0.000767758	2.76786	0.00117425	-0.1159	0.999993
71664	chr1	177794200	177794349	FALSE	other	2.2181	0.0019092	1.12944	0.170052	0.239777	0.999993
71665	chr1	177794600	177795549	FALSE	Stable	3.38802	7.16164e-06	3.0885	0.000424017	0.124854	0.999993
71666	chr1	177795750	177796399	TRUE	Stable	3.22436	1.46732e-05	2.69113	0.00152574	0.0426697	0.999993
71667	chr1	177796900	177797049	TRUE	other	0.902457	0.20392	1.53608	0.0627512	-0.206558	0.999993
71668	chr1	177983300	177984399	FALSE	Stable	3.95767	6.93736e-07	3.15067	0.000352909	0.235907	0.999993
71669	chr1	178186850	178187249	FALSE	Stable	2.47885	0.000556945	2.33091	0.00533521	0.133009	0.999993
71670	chr1	178187650	178188749	FALSE	Stable	3.58191	3.15339e-06	3.40111	0.000185377	0.164618	0.999993
71671	chr1	178275700	178276899	TRUE	Stable	4.01879	5.48173e-07	3.39312	0.000189414	-0.0706346	0.999993
71672	chr1	178300050	178300299	FALSE	Stable	2.90083	6.94518e-05	1.65018	0.0459172	0.140771	0.999993
71673	chr1	178317500	178317749	FALSE	other	4.29318	1.76465e-07	0.454385	0.581171	0.722367	0.999993
71674	chr1	178317800	178319049	TRUE	Stable	2.60977	0.000292335	2.77887	0.00113234	0.0782377	0.999993
71675	chr1	178319150	178320399	TRUE	Stable	3.04892	3.37099e-05	3.27216	0.000254255	-0.107447	0.999993
71676	chr1	178320650	178320849	FALSE	other	0.954723	0.178806	2.80261	0.00104547	-0.606744	0.999993
71677	chr1	178334500	178334649	FALSE	other	1.261	0.0757231	3.20102	0.000307243	0.32641	0.999993
71678	chr1	178334950	178336349	FALSE	Stable	3.55281	3.5675e-06	2.98137	0.000585909	0.0736453	0.999993
71679	chr1	178337950	178338799	FALSE	Stable	4.52834	6.37783e-08	2.45726	0.00345013	0.348131	0.999993
71680	chr1	178368600	178369699	FALSE	Stable	3.52549	3.99967e-06	2.71089	0.00142701	0.0541828	0.999993
71681	chr1	178405250	178405449	TRUE	other	2.77826	0.000126928	1.36971	0.0966157	0.0777427	0.999993
71682	chr1	178405550	178406249	TRUE	Stable	2.59968	0.000307618	3.56499	0.000127913	0.102242	0.999993
71683	chr1	178406550	178406849	TRUE	Stable	3.1103	2.52207e-05	3.05642	0.000466196	0.327573	0.999993
71684	chr1	178527100	178532449	TRUE	Stable	3.57885	3.20277e-06	3.28101	0.000248504	0.125674	0.999993
71685	chr1	178553050	178553199	FALSE	other	0.677306	0.340473	1.91565	0.0208739	-0.655654	0.999993
71686	chr1	178567600	178567849	FALSE	other	0.610352	0.390728	3.69776	9.85964e-05	-0.301246	0.999993
71687	chr1	178568750	178569049	TRUE	other	2.62336	0.000273051	0.550126	0.504147	0.487266	0.999993
71688	chr1	178748500	178748599	FALSE	other	3.23539	1.39855e-05	0.312313	0.70494	0.649202	0.999993
71689	chr1	179059300	179059549	FALSE	other	0.846533	0.233305	3.43899	0.000169057	-0.610185	0.999993
71690	chr1	179060200	179060299	TRUE	other	1.27862	0.0717149	1.65523	0.045273	0.20608	0.999993
71691	chr1	179060600	179060949	TRUE	Stable	2.50705	0.000484941	1.71162	0.0385509	-0.481548	0.999993
71692	chr1	179096900	179097199	FALSE	Stable	2.61981	0.000277935	2.7324	0.00132386	0.470101	0.999993
71693	chr1	179177300	179177449	FALSE	other	0.458715	0.519158	1.59621	0.0533125	-0.300458	0.999993
71694	chr1	179197950	179198249	TRUE	other	2.86707	8.22297e-05	0.717251	0.383321	0.438779	0.999993
71695	chr1	179400000	179400149	FALSE	other	1.22864	0.0836165	0.360319	0.661937	-0.241555	0.999993
71696	chr1	179458600	179458749	FALSE	Stable	2.50033	0.000501042	1.94605	0.0189906	-0.109036	0.999993
71697	chr1	179516700	179518049	FALSE	Stable	3.3565	8.31916e-06	3.8992	6.52848e-05	0.167536	0.999993
71698	chr1	179545250	179545999	FALSE	Stable	2.55827	0.000377309	3.0356	0.00049656	-0.10063	0.999993
71699	chr1	179546750	179547549	FALSE	Stable	3.41113	6.4957e-06	3.6903	0.000100798	0.0471652	0.999993
71700	chr1	179667450	179669499	FALSE	Stable	3.04733	3.39712e-05	3.26587	0.000258223	0.00417032	0.999993
71701	chr1	179801950	179802199	FALSE	other	2.83946	9.40023e-05	1.40218	0.0890109	0.29725	0.999993
71702	chr1	179802250	179803299	FALSE	Stable	3.03622	3.59303e-05	3.41407	0.00017967	-0.195083	0.999993
71703	chr1	179803400	179803549	FALSE	other	1.73911	0.0145389	1.07757	0.190272	-0.467093	0.999993
71704	chr1	179804100	179804399	FALSE	Stable	2.35489	0.00100862	2.7195	0.00138499	0.313939	0.999993
71705	chr1	179847950	179848349	FALSE	Stable	3.05668	3.25232e-05	2.67812	0.00159673	0.212296	0.999993
71706	chr1	179958850	179959849	FALSE	Stable	3.06064	3.19475e-05	3.35803	0.000205253	-0.0829589	0.999993
71707	chr1	179960050	179960449	FALSE	Stable	2.50877	0.000481148	2.61769	0.00196431	-0.482669	0.999993
71708	chr1	179960500	179961999	FALSE	Stable	3.06193	3.17506e-05	3.29129	0.000242224	0.196982	0.999993
71709	chr1	179962800	179962999	FALSE	Stable	1.57961	0.0262918	2.57114	0.00230843	-0.717833	0.999993
71710	chr1	180195100	180195949	FALSE	Stable	3.89609	9.00479e-07	3.141	0.000363311	0.290865	0.999993
71711	chr1	180196300	180196649	FALSE	Stable	2.28905	0.00137441	2.70937	0.00143431	-0.0746319	0.999993
71712	chr1	180225650	180226749	FALSE	Stable	3.21368	1.54116e-05	2.71264	0.00141824	0.21895	0.999993
71713	chr1	180250100	180250249	FALSE	other	0.242561	0.734482	2.3267	0.00541499	-0.456072	0.999993
71714	chr1	180255550	180256949	FALSE	Stable	3.48142	4.80486e-06	3.40052	0.000185637	0.192904	0.999993
71715	chr1	180313800	180314099	FALSE	other	2.54796	0.000396936	1.17688	0.152967	0.405827	0.999993
71716	chr1	180329900	180332899	FALSE	Stable	3.9169	8.23723e-07	3.20348	0.000305442	0.25906	0.999993
71717	chr1	180365000	180365149	FALSE	Stable	2.45081	0.000637166	2.24385	0.00717256	0.634035	0.999993
71718	chr1	180365350	180365999	FALSE	Stable	3.04765	3.39257e-05	3.20357	0.000305442	0.116994	0.999993
71719	chr1	180386850	180387499	FALSE	Stable	3.94146	7.38296e-07	2.52422	0.00272575	0.0125625	0.999993
71720	chr1	180387750	180387899	FALSE	other	1.27293	0.0730053	2.00954	0.0155248	-0.628413	0.999993
71721	chr1	180433100	180433549	FALSE	Stable	3.35297	8.44108e-06	2.62449	0.00191766	0.0589472	0.999993
71722	chr1	180482400	180482549	FALSE	other	0.856059	0.228093	3.32421	0.000223347	-0.652135	0.999993
71723	chr1	180483100	180483999	FALSE	Stable	3.52172	4.0563e-06	2.92945	0.000688977	0.239119	0.999993
71724	chr1	180547850	180548299	FALSE	Stable	2.39438	0.000835813	3.1358	0.00036855	-0.10944	0.999993
71725	chr1	180568350	180568799	FALSE	Stable	3.14821	2.1075e-05	3.34881	0.000210139	0.0507009	0.999993
71726	chr1	180568950	180570199	FALSE	Stable	3.01778	3.91891e-05	3.51732	0.000142482	0.0553528	0.999993
71727	chr1	180640050	180641049	FALSE	Stable	3.38793	7.16494e-06	3.32914	0.000221295	0.116233	0.999993
71728	chr1	180641650	180642349	FALSE	Stable	3.48139	4.80486e-06	2.44263	0.00362549	-0.187128	0.999993
71729	chr1	180696550	180697149	FALSE	Stable	3.00745	4.11435e-05	1.94436	0.0190935	0.492001	0.999993
71730	chr1	180725400	180725949	FALSE	Stable	2.0693	0.00371757	3.18667	0.000319596	0.0785035	0.999993
71731	chr1	180726150	180727499	FALSE	Stable	3.6431	2.48318e-06	2.60053	0.00208561	0.116268	0.999993
71732	chr1	180763400	180764099	FALSE	Stable	3.45129	5.45224e-06	2.97375	0.000599438	0.22438	0.999993
71733	chr1	180767800	180768899	FALSE	Stable	2.97997	4.72519e-05	3.28157	0.000248179	0.211708	0.999993
71734	chr1	180777050	180778949	FALSE	Stable	3.02472	3.79387e-05	2.88169	0.000803233	0.152414	0.999993
71735	chr1	180793800	180794599	FALSE	Stable	3.32587	9.47348e-06	3.21654	0.000294581	-0.0660005	0.999993
71736	chr1	180810850	180810999	FALSE	Stable	1.65635	0.0198387	3.62738	0.000112502	-0.152309	0.999993
71737	chr1	180811450	180811699	FALSE	Stable	2.42598	0.000718316	2.53622	0.00261194	-0.826385	0.999993
71738	chr1	180812800	180812949	FALSE	other	1.2198	0.085831	3.25712	0.00026399	0.090393	0.999993
71739	chr1	180813950	180814799	FALSE	Stable	2.69123	0.000195326	3.07091	0.000446453	-0.295349	0.999993
71740	chr1	180847850	180848149	FALSE	Stable	2.67577	0.000210854	2.14631	0.00993326	0.376653	0.999993
71741	chr1	180848300	180848599	FALSE	other	2.75377	0.000143235	1.57169	0.0570133	0.604752	0.999993
71742	chr1	180848700	180848949	FALSE	other	1.5493	0.0292904	1.53166	0.0635047	0.00270295	0.999993
71743	chr1	180850100	180850849	FALSE	Stable	2.94952	5.46068e-05	2.82753	0.000962527	-0.124734	0.999993
71744	chr1	180851350	180852149	FALSE	Stable	2.70337	0.000183831	3.754	8.71534e-05	-0.0302943	0.999993
71745	chr1	180894350	180894949	FALSE	Stable	1.43591	0.0432934	3.20116	0.000307243	-0.424514	0.999993
71746	chr1	180903700	180904149	FALSE	Stable	2.24225	0.00170868	2.93473	0.000678101	-0.16595	0.999993
71747	chr1	180904300	180905349	FALSE	Stable	2.57997	0.000338414	3.08243	0.000431601	0.202437	0.999993
71748	chr1	180941600	180943099	FALSE	Stable	3.68585	2.07759e-06	3.02554	0.000512623	0.132248	0.999993
71749	chr1	180945550	180945699	FALSE	other	3.44838	5.52256e-06	0.97755	0.234563	0.596742	0.999993
71750	chr1	181016700	181017549	FALSE	Stable	3.27103	1.18468e-05	3.8365	7.36634e-05	-0.0389418	0.999993
71751	chr1	181142950	181144049	FALSE	Stable	3.13074	2.29e-05	2.68325	0.00156816	0.0782409	0.999993
71752	chr1	181144400	181145899	FALSE	Stable	3.35461	8.38452e-06	3.03922	0.000490351	0.0333039	0.999993
71753	chr1	181151050	181151949	FALSE	Stable	2.50344	0.000493672	3.53656	0.000136475	-0.338386	0.999993
71754	chr1	181210050	181211399	TRUE	Stable	3.32114	9.61622e-06	2.77522	0.00114449	0.0613907	0.999993
71755	chr1	181212000	181212799	TRUE	Stable	3.08714	2.80674e-05	3.64567	0.000109802	-0.0854594	0.999993
71756	chr1	181256100	181257299	FALSE	Stable	2.98465	4.62107e-05	3.05019	0.000475008	0.0750531	0.999993
71757	chr1	181352200	181353299	FALSE	Stable	3.06525	3.12181e-05	3.48709	0.000151662	0.109128	0.999993
71758	chr1	181840700	181840949	FALSE	Stable	2.31437	0.00121898	2.65554	0.00172231	-0.168449	0.999993
71759	chr1	181841000	181842299	FALSE	Stable	3.56659	3.37415e-06	2.9166	0.000718988	0.158787	0.999993
71760	chr1	181842600	181843449	FALSE	Stable	3.14531	2.13732e-05	2.56415	0.0023648	0.145755	0.999993
71761	chr1	182018250	182019199	FALSE	Stable	2.74178	0.0001521	3.87426	6.81113e-05	0.00836451	0.999993
71762	chr1	182019300	182019999	TRUE	Stable	2.76876	0.000133122	1.97853	0.0171294	0.233366	0.999993
71763	chr1	182020400	182020949	TRUE	Stable	4.51109	7.19046e-08	2.77849	0.00113371	0.45563	0.999993
71764	chr1	182125000	182125799	TRUE	Stable	2.63214	0.000261595	2.29519	0.00603414	0.0800244	0.999993
71765	chr1	182258550	182258749	FALSE	Stable	3.19042	1.71831e-05	1.66397	0.0441752	0.416567	0.999993
71766	chr1	182280900	182281099	FALSE	other	1.34431	0.0584537	2.88606	0.00079301	-0.488562	0.999993
71767	chr1	182281600	182282749	FALSE	Stable	3.12716	2.32564e-05	2.86623	0.000845454	0.0803886	0.999993
71768	chr1	182282950	182283199	FALSE	Stable	1.51378	0.0331662	2.84552	0.000907377	-0.185244	0.999993
71769	chr1	182339850	182340049	FALSE	other	2.64857	0.000241277	1.28212	0.119647	-0.286704	0.999993
71770	chr1	182340100	182340299	FALSE	other	1.07825	0.128911	2.873	0.000825741	-0.957716	0.999993
71771	chr1	182340450	182340799	FALSE	Stable	2.35776	0.000995272	2.89116	0.000781033	-0.47005	0.999993
71772	chr1	182340850	182341299	FALSE	Stable	3.42317	6.17086e-06	2.10951	0.0112331	0.427976	0.999993
71773	chr1	182341750	182341999	FALSE	Stable	1.95996	0.00595588	2.36051	0.00482236	0.0802371	0.999993
71774	chr1	182408250	182408849	FALSE	Stable	2.35467	0.00100966	2.52588	0.00270858	0.0818064	0.999993
71775	chr1	182409300	182410449	FALSE	Stable	3.12577	2.34129e-05	2.83944	0.000926941	0.111665	0.999993
71776	chr1	182410600	182411199	FALSE	Stable	2.2004	0.00207273	3.77849	8.29708e-05	-0.170695	0.999993
71777	chr1	182516450	182517899	FALSE	Stable	3.34718	8.65095e-06	3.38701	0.00019175	0.19422	0.999993
71778	chr1	182539300	182539549	FALSE	Stable	2.98175	4.68415e-05	1.77464	0.0320307	0.358229	0.999993
71779	chr1	182763650	182765149	FALSE	Stable	3.44605	5.58785e-06	3.52908	0.000138909	0.234162	0.999993
71780	chr1	182792150	182792349	FALSE	other	2.52444	0.000445395	-0.198013	0.810913	0.87969	0.999993
71781	chr1	182954700	182955349	FALSE	Stable	3.14359	2.15357e-05	3.0748	0.000441525	0.0529388	0.999993
71782	chr1	182959400	182960299	FALSE	Stable	3.3848	7.27575e-06	3.76291	8.60086e-05	-0.140576	0.999993
71783	chr1	183141900	183142149	FALSE	Stable	1.76269	0.0132546	3.52266	0.000140695	-0.131904	0.999993
71784	chr1	183145100	183147499	TRUE	Stable	2.84668	9.07816e-05	3.21103	0.00029939	-0.296741	0.999993
71785	chr1	183148100	183148249	TRUE	Stable	1.48371	0.0368117	1.96362	0.0179685	-0.0528408	0.999993
71786	chr1	183163850	183163999	FALSE	other	0.720954	0.310271	2.7269	0.00134854	-1.15737	0.999993
71787	chr1	183187950	183188049	FALSE	other	1.8253	0.0103598	0.635356	0.439988	0.116661	0.999993
71788	chr1	183188300	183188599	FALSE	Stable	2.28449	0.00140412	1.99205	0.0164213	-0.335644	0.999993
71789	chr1	183188650	183188849	TRUE	Stable	1.43012	0.0441563	2.00546	0.0157314	-0.982495	0.999993
71790	chr1	183189950	183190099	FALSE	Stable	1.52765	0.0315957	1.99796	0.0161117	-0.196611	0.999993
71791	chr1	183220550	183221499	FALSE	Stable	2.97333	4.87674e-05	3.49415	0.000149213	-0.115334	0.999993
71792	chr1	183296350	183296899	TRUE	Stable	3.37933	7.45174e-06	2.61232	0.00200124	0.223656	0.999993
71793	chr1	183297450	183298699	TRUE	Stable	3.68085	2.13092e-06	3.03774	0.000492818	0.131432	0.999993
71794	chr1	183344750	183346299	FALSE	Stable	3.5989	2.94754e-06	3.03955	0.00049003	0.0584478	0.999993
71795	chr1	183368450	183369449	FALSE	Stable	3.49024	4.62729e-06	3.28921	0.000243385	-0.10168	0.999993
71796	chr1	183369750	183370249	FALSE	Stable	2.93234	5.93989e-05	2.43763	0.00368951	0.325064	0.999993
71797	chr1	183388500	183388699	FALSE	Stable	1.47882	0.0374279	2.80845	0.00102597	-0.0480312	0.999993
71798	chr1	183389000	183389149	FALSE	Stable	1.77691	0.0125393	2.1012	0.0115523	0.503332	0.999993
71799	chr1	183389200	183389949	FALSE	Stable	2.65743	0.000230968	3.20574	0.000304028	-0.230057	0.999993
71800	chr1	183827650	183827799	FALSE	other	1.21719	0.0864606	3.22993	0.000283721	-2.01274	0.331038
71801	chr1	183837500	183837699	FALSE	other	0.652551	0.358405	3.29247	0.000241583	-1.21493	0.999993
71802	chr1	184033000	184034199	FALSE	Stable	3.36531	7.99246e-06	3.22066	0.000291036	0.166578	0.999993
71803	chr1	184034500	184035349	FALSE	Stable	2.91947	6.33856e-05	4.74546	5.79959e-06	-0.0118535	0.999993
71804	chr1	184035450	184035599	FALSE	other	1.62611	0.0221936	1.24934	0.129341	-0.472116	0.999993
71805	chr1	184441200	184441399	FALSE	Stable	2.30675	0.00126459	2.64645	0.00177502	-0.16698	0.999993
71806	chr1	184727550	184728249	FALSE	Stable	2.73387	0.000158328	2.43881	0.0036741	0.439742	0.999993
71807	chr1	184731650	184733399	TRUE	Stable	4.12753	3.65252e-07	2.90957	0.000736484	0.268236	0.999993
71808	chr1	184810700	184811249	FALSE	Stable	2.44191	0.000665914	2.61286	0.00199749	-0.0995669	0.999993
71809	chr1	184823050	184823249	FALSE	other	0.643001	0.365601	2.83507	0.000939295	-0.780159	0.999993
71810	chr1	184844900	184846549	FALSE	Stable	3.34355	8.7763e-06	3.60986	0.000116013	0.178309	0.999993
71811	chr1	184882300	184883299	FALSE	Stable	2.67048	0.000216598	3.50908	0.000144554	0.158956	0.999993
71812	chr1	184998750	185000399	TRUE	Stable	3.00128	4.24738e-05	3.19259	0.000313852	-0.126899	0.999993
71813	chr1	185183950	185184149	FALSE	other	2.27475	0.00146921	0.810944	0.32414	0.526724	0.999993
71814	chr1	185203250	185204049	FALSE	Stable	2.31636	0.00120906	3.27352	0.000253104	0.0843656	0.999993
71815	chr1	185204150	185204949	FALSE	Stable	2.84657	9.08317e-05	2.60107	0.00208175	0.0660872	0.999993
71816	chr1	185328150	185329299	FALSE	Stable	3.19189	1.70636e-05	2.77668	0.00113931	-0.0027849	0.999993
71817	chr1	185329550	185329699	FALSE	other	1.46631	0.0390493	0.902587	0.272462	-0.546158	0.999993
71818	chr1	185329800	185329899	FALSE	other	0.904371	0.202978	3.63405	0.000111276	-0.91096	0.999993
71819	chr1	185331700	185333049	FALSE	Stable	2.73346	0.000158631	3.58213	0.000123027	-0.0314402	0.999993
71820	chr1	185362250	185362749	TRUE	Stable	2.75758	0.000140728	2.16482	0.00934721	0.215977	0.999993
71821	chr1	185363200	185364499	TRUE	Stable	3.618	2.73951e-06	2.80841	0.00102603	0.2343	0.999993
71822	chr1	185454600	185455949	FALSE	Stable	3.4335	5.8934e-06	2.92189	0.00070645	0.0106985	0.999993
71823	chr1	185482050	185482449	TRUE	Stable	2.78772	0.000121067	2.48879	0.00308769	-0.0313356	0.999993
71824	chr1	185670650	185670799	FALSE	other	0.599606	0.399111	2.4215	0.00389804	-0.664328	0.999993
71825	chr1	185730850	185730999	TRUE	other	1.95906	0.00597722	1.59743	0.0531379	0.2732	0.999993
71826	chr1	186116550	186117299	FALSE	Stable	3.09854	2.66231e-05	3.77552	8.33369e-05	-0.0886337	0.999993
71827	chr1	186182850	186183199	FALSE	other	3.12006	2.4083e-05	1.61497	0.0506539	0.207385	0.999993
71828	chr1	186435250	186435349	FALSE	other	2.88885	7.36957e-05	-0.113219	0.891315	0.728196	0.999993
71829	chr1	186702500	186703199	FALSE	Stable	2.58945	0.000323681	3.22246	0.000289195	-0.426869	0.999993
71830	chr1	186703400	186706199	FALSE	Stable	3.49976	4.43844e-06	3.11616	0.000391236	0.27837	0.999993
71831	chr1	186748000	186749199	FALSE	Stable	2.59982	0.000307396	3.26598	0.000258194	-0.0601985	0.999993
71832	chr1	186749450	186750199	FALSE	Stable	2.96892	4.97663e-05	3.14314	0.000361004	0.195838	0.999993
71833	chr1	186833300	186834599	FALSE	Stable	3.29054	1.0883e-05	3.2444	0.000272765	0.0805332	0.999993
71834	chr1	186834700	186834849	FALSE	other	1.99059	0.00522915	1.61656	0.050446	-0.0331208	0.999993
71835	chr1	187214900	187216199	FALSE	Stable	2.88173	7.63819e-05	3.17594	0.000329229	-0.0775999	0.999993
71836	chr1	187463300	187463499	FALSE	other	-1.73524	0.0147568	3.45419	0.00016324	-2.237	0.147346
71837	chr1	187604100	187604349	FALSE	Stable	1.91958	0.0070444	2.98192	0.00058521	-0.0649075	0.999993
71838	chr1	187604700	187605699	FALSE	Stable	3.27079	1.18547e-05	2.02046	0.0149837	0.144522	0.999993
71839	chr1	187608650	187609949	FALSE	Stable	3.26155	1.238e-05	2.8989	0.000761602	0.428912	0.999993
71840	chr1	187651200	187652599	FALSE	Stable	3.80158	1.29471e-06	3.53441	0.000136896	-0.040795	0.999993
71841	chr1	187662400	187662549	FALSE	Stable	2.04299	0.00417221	4.13543	3.67837e-05	-0.273715	0.999993
71842	chr1	187662750	187662949	FALSE	other	3.00451	4.17362e-05	1.50568	0.0680958	0.42555	0.999993
71843	chr1	187675050	187675149	TRUE	other	0.811073	0.253456	2.16604	0.00930698	-0.197403	0.999993
71844	chr1	187676500	187676599	TRUE	other	0.133892	0.851794	2.74982	0.00124801	0.485563	0.999993
71845	chr1	187677300	187677449	TRUE	other	1.57043	0.0271709	1.04144	0.205562	-0.319894	0.999993
71846	chr1	187803900	187804049	FALSE	Stable	2.10642	0.00315771	3.46068	0.000161631	0.0707378	0.999993
71847	chr1	187997200	187998449	FALSE	Stable	3.57499	3.24978e-06	2.67599	0.00160955	0.43786	0.999993
71848	chr1	188029750	188030149	FALSE	Stable	2.24167	0.00171305	2.04766	0.013742	-0.26113	0.999993
71849	chr1	188052800	188052999	FALSE	other	0.458059	0.519715	3.14124	0.000363186	-0.301114	0.999993
71850	chr1	188149450	188149549	FALSE	other	2.58567	0.000329392	0.341194	0.678951	1.1712	0.999993
71851	chr1	188457150	188457249	FALSE	other	1.14376	0.107245	1.70181	0.0396537	-1.22136	0.999993
71852	chr1	188587250	188587399	FALSE	other	3.31175	9.97303e-06	1.24994	0.129188	0.516789	0.999993
71853	chr1	188660550	188660699	FALSE	other	1.92479	0.00690577	1.06888	0.193895	0.227831	0.999993
71854	chr1	188660900	188661199	FALSE	Stable	2.17104	0.00236524	3.58923	0.000122163	-0.0107911	0.999993
71855	chr1	189006550	189007649	TRUE	Stable	2.99666	4.34666e-05	3.48463	0.000152822	0.101378	0.999993
71856	chr1	189012950	189013149	FALSE	Stable	1.43012	0.0441563	3.95482	5.71194e-05	-0.396986	0.999993
71857	chr1	189342700	189344199	FALSE	Stable	3.59462	2.99388e-06	3.8023	8.00556e-05	0.0263758	0.999993
71858	chr1	189402600	189402749	FALSE	Stable	2.47005	0.000581237	2.86805	0.000839946	0.45057	0.999993
71859	chr1	189686750	189688049	FALSE	Stable	2.84943	8.96004e-05	3.09664	0.000414449	0.135102	0.999993
71860	chr1	189688650	189689149	FALSE	Stable	3.29865	1.05044e-05	2.23277	0.0074458	-0.196895	0.999993
71861	chr1	189689200	189689449	FALSE	Stable	3.13064	2.29031e-05	2.81485	0.0010055	-0.533092	0.999993
71862	chr1	189727300	189729599	TRUE	Stable	3.60811	2.83863e-06	3.75003	8.81403e-05	0.137851	0.999993
71863	chr1	189831150	189831249	FALSE	other	0.986299	0.164792	3.56503	0.000127913	-0.760006	0.999993
71864	chr1	189831300	189831399	FALSE	Stable	1.72412	0.0153721	1.77967	0.0315556	0.399289	0.999993
71865	chr1	189921000	189922949	FALSE	Stable	2.99515	4.37865e-05	3.33652	0.000217669	0.106888	0.999993
71866	chr1	190018150	190018449	FALSE	Stable	2.45575	0.000622063	2.52969	0.00267241	-0.0435742	0.999993
[truncated: 33,803 more rows]

## Sheet: Stable
Peak_ID	Chromosome	Start	End	Gli3_binding	Type	WTinput_FC	WTinput_adjPval	SHHnullinput_FC	SHHnullinput_adjPval	WTSHHnull_FC	WTSHHnull_adjPval
69873	chr1	4571150	4572299	TRUE	Stable	3.44776	5.53431e-06	2.61931	0.00195339	0.0120696	0.999993
69879	chr1	4857050	4857499	TRUE	Stable	2.23355	0.00177806	2.79244	0.00108082	-0.0323574	0.999993
69905	chr1	9699350	9700249	TRUE	Stable	3.12461	2.35512e-05	3.07611	0.000440226	-0.128468	0.999993
69906	chr1	9700750	9701449	TRUE	Stable	2.74431	0.000150071	3.10172	0.000408598	0.155692	0.999993
69925	chr1	10993150	10994999	TRUE	Stable	3.14712	2.11856e-05	3.246	0.000271525	0.165871	0.999993
69940	chr1	13371650	13372449	TRUE	Stable	2.45564	0.000622395	3.21545	0.000295265	0.00646774	0.999993
69941	chr1	13372850	13374949	TRUE	Stable	3.67084	2.22977e-06	2.84188	0.000919055	0.426944	0.999993
69946	chr1	13589400	13589849	TRUE	Stable	3.43243	5.92438e-06	2.12634	0.0106197	0.317383	0.999993
69947	chr1	13590100	13590199	TRUE	Stable	3.9651	6.78363e-07	1.91565	0.0208739	0.504423	0.999993
69973	chr1	16104550	16105199	TRUE	Stable	3.45031	5.47697e-06	2.06142	0.0131416	0.342264	0.999993
69974	chr1	16105300	16107199	TRUE	Stable	3.67598	2.17406e-06	3.47079	0.000158368	0.245462	0.999993
69980	chr1	16617900	16619099	TRUE	Stable	3.47945	4.84736e-06	3.25283	0.000267092	0.217118	0.999993
69981	chr1	16619500	16620049	TRUE	Stable	2.3343	0.00111128	2.92726	0.000694242	-0.281372	0.999993
70028	chr1	24194850	24196149	TRUE	Stable	2.83819	9.4569e-05	3.11521	0.000392419	-0.0780714	0.999993
70029	chr1	24196350	24196649	TRUE	Stable	1.55513	0.0286904	2.74933	0.00124929	0.62088	0.999993
70038	chr1	25829350	25830399	TRUE	Stable	3.93645	7.57432e-07	3.19955	0.000308544	-0.0572713	0.999993
70039	chr1	25830450	25830949	TRUE	Stable	2.4773	0.000561067	2.64844	0.00176393	0.0349988	0.999993
70043	chr1	30872250	30873749	TRUE	Stable	3.40762	6.60695e-06	2.84813	0.000899645	0.181782	0.999993
70044	chr1	30874050	30874349	TRUE	Stable	1.79227	0.0118114	2.67995	0.0015863	-0.244449	0.999993
70053	chr1	33719750	33721149	TRUE	Stable	2.62174	0.000275242	2.89603	0.000769355	0.128386	0.999993
70080	chr1	34842950	34843649	TRUE	Stable	2.64519	0.000245338	3.31227	0.000229767	-0.140549	0.999993
70092	chr1	36367950	36368799	TRUE	Stable	3.19417	1.68879e-05	2.95952	0.000627267	0.24008	0.999993
70093	chr1	36368850	36368999	TRUE	Stable	1.90968	0.0073393	2.38793	0.00438088	0.104441	0.999993
70098	chr1	36512150	36512249	TRUE	Stable	1.73288	0.0148903	1.9209	0.0205402	-0.595167	0.999993
70099	chr1	36512400	36513699	TRUE	Stable	2.94201	5.67626e-05	2.9164	0.000719431	0.0173544	0.999993
70101	chr1	36555500	36557149	TRUE	Stable	3.04423	3.4509e-05	3.04724	0.000478921	0.0549541	0.999993
70102	chr1	36557250	36557449	TRUE	Stable	2.30394	0.00128135	1.95771	0.0183163	-0.00291005	0.999993
70103	chr1	36558000	36558199	TRUE	Stable	2.35185	0.00102177	1.70498	0.03931	-0.481766	0.999993
70104	chr1	36558450	36559299	TRUE	Stable	3.23173	1.42165e-05	3.32596	0.000222875	0.0329758	0.999993
70107	chr1	36691150	36691249	TRUE	Stable	2.04705	0.00409894	2.60066	0.00208463	0.294964	0.999993
70108	chr1	36691700	36692499	TRUE	Stable	3.34657	8.6738e-06	3.30648	0.000233185	0.256703	0.999993
70109	chr1	36708900	36709899	TRUE	Stable	2.83383	9.65758e-05	3.12577	0.000379415	0.159101	0.999993
70110	chr1	36723550	36723799	TRUE	Stable	1.88728	0.00805236	2.71111	0.00142586	0.417306	0.999993
70114	chr1	36938050	36939549	TRUE	Stable	3.26634	1.21177e-05	3.12443	0.000381036	-0.0880634	0.999993
70119	chr1	37429300	37429899	TRUE	Stable	3.26126	1.23952e-05	2.87473	0.00082139	0.115209	0.999993
70120	chr1	37430300	37431249	TRUE	Stable	3.36835	7.87559e-06	3.09336	0.000418192	-0.238249	0.999993
70125	chr1	37864100	37864849	TRUE	Stable	2.74283	0.00015127	2.73279	0.00132226	0.15473	0.999993
70126	chr1	37865350	37866199	TRUE	Stable	2.76143	0.000138105	2.91885	0.000713214	0.000749631	0.999993
70131	chr1	37996200	37996899	TRUE	Stable	3.9232	8.00555e-07	3.23636	0.000279365	0.278586	0.999993
70132	chr1	37997450	37997949	TRUE	Stable	2.9758	4.82139e-05	2.7435	0.00127499	0.25049	0.999993
70134	chr1	38128450	38129549	TRUE	Stable	3.38929	7.12203e-06	2.62212	0.0019331	-0.0372864	0.999993
70137	chr1	38512750	38512999	TRUE	Stable	2.30866	0.0012528	1.87143	0.0239329	0.291079	0.999993
70143	chr1	38758500	38758649	TRUE	Stable	2.2204	0.00188958	1.9353	0.019641	0.196665	0.999993
70156	chr1	39534950	39535549	TRUE	Stable	3.08941	2.77595e-05	2.73096	0.00133064	-0.123131	0.999993
70157	chr1	39535950	39536899	TRUE	Stable	3.03263	3.65652e-05	3.18578	0.000320257	0.154143	0.999993
70158	chr1	39575800	39577349	TRUE	Stable	4.07686	4.51798e-07	2.73003	0.00133519	0.308182	0.999993
70159	chr1	39577550	39578099	TRUE	Stable	2.15473	0.00254411	3.30623	0.000233312	0.0303734	0.999993
70163	chr1	39899950	39900849	TRUE	Stable	3.83762	1.10951e-06	2.68702	0.00154802	-0.0828295	0.999993
70164	chr1	39901200	39901499	TRUE	Stable	2.57829	0.000341046	1.81042	0.028774	0.139787	0.999993
70193	chr1	42693450	42695449	TRUE	Stable	3.34376	8.76817e-06	3.34161	0.000214221	0.063876	0.999993
70205	chr1	42952700	42954049	TRUE	Stable	3.07485	2.97841e-05	3.0444	0.000482784	0.0866177	0.999993
70207	chr1	43097650	43098499	TRUE	Stable	3.10931	2.53166e-05	2.83537	0.000939013	0.418627	0.999993
70209	chr1	43099000	43099499	TRUE	Stable	2.809	0.00010904	2.78582	0.00110677	0.143349	0.999993
70211	chr1	43444700	43445849	TRUE	Stable	2.35946	0.000987035	3.32451	0.000223326	-0.105982	0.999993
70216	chr1	43828100	43828549	TRUE	Stable	2.27407	0.0014737	2.38336	0.00445464	-0.282349	0.999993
70220	chr1	44101050	44102049	TRUE	Stable	3.61062	2.82038e-06	3.24823	0.000270284	0.191425	0.999993
70221	chr1	44102100	44102299	TRUE	Stable	1.79374	0.0117434	2.77955	0.00113009	-0.307249	0.999993
70222	chr1	44102600	44103249	TRUE	Stable	2.61681	0.000282031	2.44035	0.00365331	0.209227	0.999993
70226	chr1	44147100	44147749	TRUE	Stable	3.1205	2.40396e-05	2.08893	0.0120111	0.0837131	0.999993
70227	chr1	44147950	44148999	TRUE	Stable	3.39577	6.93691e-06	2.59046	0.00215943	0.0709817	0.999993
70230	chr1	44551900	44553249	TRUE	Stable	2.78338	0.000123702	3.08207	0.00043212	0.143689	0.999993
70244	chr1	46066400	46067499	TRUE	Stable	3.22273	1.47812e-05	2.81956	0.000988312	0.0500204	0.999993
70248	chr1	46854000	46854249	TRUE	Stable	1.5661	0.0275935	2.68196	0.00157482	-0.698301	0.999993
70262	chr1	51915550	51915899	TRUE	Stable	2.23625	0.00175652	1.71267	0.038455	-0.161759	0.999993
70266	chr1	52113300	52113799	TRUE	Stable	2.92688	6.1042e-05	2.71583	0.00140364	-0.104269	0.999993
70295	chr1	54556600	54557799	TRUE	Stable	4.33031	1.56765e-07	3.51448	0.000143348	0.336999	0.999993
70296	chr1	54557950	54558349	TRUE	Stable	2.66659	0.000220799	2.42357	0.00387142	0.0790214	0.999993
70298	chr1	54906750	54907299	TRUE	Stable	2.72098	0.000168155	2.45351	0.00349102	0.201963	0.999993
70308	chr1	55088500	55089599	TRUE	Stable	3.16902	1.90552e-05	2.82269	0.000978436	0.167185	0.999993
70310	chr1	55130550	55131199	TRUE	Stable	3.59736	2.96149e-06	2.49595	0.00301113	-0.0517946	0.999993
70311	chr1	55131750	55132499	TRUE	Stable	2.84819	9.01477e-05	2.84224	0.000917982	0.000113073	0.999993
70314	chr1	55236450	55237099	TRUE	Stable	2.00036	0.00501213	2.97866	0.00059124	-0.158508	0.999993
70315	chr1	55237250	55239049	TRUE	Stable	3.56374	3.41542e-06	3.22082	0.000290821	0.159741	0.999993
70323	chr1	56970800	56973999	TRUE	Stable	3.30642	1.01853e-05	3.23033	0.000283721	0.081814	0.999993
70332	chr1	57405600	57406399	TRUE	Stable	2.99173	4.45585e-05	2.7121	0.00142111	0.0298465	0.999993
70333	chr1	57406600	57407599	TRUE	Stable	2.43788	0.000679002	3.24037	0.00027617	-0.0773092	0.999993
70342	chr1	58391700	58392999	TRUE	Stable	3.39227	7.03335e-06	3.01102	0.000535742	-0.027505	0.999993
70357	chr1	58972600	58973299	TRUE	Stable	3.1185	2.42606e-05	2.66427	0.00167181	0.0329943	0.999993
70358	chr1	58973650	58974649	TRUE	Stable	3.15329	2.05936e-05	3.51151	0.000143773	0.408054	0.999993
70359	chr1	59119400	59119599	TRUE	Stable	1.90632	0.00744314	2.29739	0.0059892	0.175562	0.999993
70360	chr1	59120050	59120699	TRUE	Stable	2.88097	7.66772e-05	2.59457	0.0021294	0.431075	0.999993
70367	chr1	59270400	59270749	TRUE	Stable	1.59896	0.02451	2.83905	0.00092782	-0.0935934	0.999993
70371	chr1	59480500	59481899	TRUE	Stable	3.0667	3.09891e-05	2.82904	0.000957868	0.112882	0.999993
70382	chr1	59762150	59763349	TRUE	Stable	3.01812	3.91334e-05	2.75673	0.00121863	-0.00629618	0.999993
70383	chr1	59763700	59764149	TRUE	Stable	2.50538	0.000488678	2.46253	0.00338493	0.286539	0.999993
70387	chr1	59912950	59914349	TRUE	Stable	3.11529	2.46438e-05	2.65721	0.00171208	0.049233	0.999993
70389	chr1	60096650	60097999	TRUE	Stable	3.44494	5.609e-06	3.70182	9.83448e-05	0.0694482	0.999993
70390	chr1	60098450	60099199	TRUE	Stable	3.10855	2.54002e-05	2.70908	0.00143592	0.0463278	0.999993
70395	chr1	60408750	60409299	TRUE	Stable	2.11623	0.00302214	3.52568	0.000140568	-0.00663492	0.999993
70396	chr1	60409850	60410049	TRUE	Stable	3.9273	7.84224e-07	1.99302	0.0163712	-0.131366	0.999993
70404	chr1	61233850	61233999	TRUE	Stable	2.51137	0.000475121	4.21009	2.82785e-05	0.120004	0.999993
70405	chr1	61234100	61234399	TRUE	Stable	2.42695	0.000715018	2.91854	0.000713898	-0.383399	0.999993
70406	chr1	61234450	61234649	TRUE	Stable	2.16586	0.00242094	2.17619	0.00899829	-0.417487	0.999993
70407	chr1	61301350	61301649	TRUE	Stable	2.78752	0.000121158	2.60562	0.00204862	0.354624	0.999993
70422	chr1	62767250	62767499	TRUE	Stable	2.33749	0.00109433	2.21377	0.00794244	-0.0125505	0.999993
70436	chr1	63247150	63247399	TRUE	Stable	2.11951	0.00297882	2.29419	0.00605413	-0.00194812	0.999993
70449	chr1	64616400	64618349	TRUE	Stable	3.45913	5.27321e-06	3.22203	0.000289619	0.289666	0.999993
70460	chr1	65178350	65179099	TRUE	Stable	2.85561	8.69509e-05	3.68551	0.000101899	-0.0766377	0.999993
70461	chr1	65179400	65179999	TRUE	Stable	3.66997	2.23684e-06	3.02497	0.000513657	0.475352	0.999993
70475	chr1	66817700	66818549	TRUE	Stable	3.45212	5.43771e-06	3.29763	0.000238989	0.109905	0.999993
70494	chr1	71650900	71653249	TRUE	Stable	2.95523	5.31528e-05	3.54278	0.000134794	0.108723	0.999993
70495	chr1	71653450	71654549	TRUE	Stable	3.60975	2.83175e-06	3.6361	0.000111012	0.0851272	0.999993
70504	chr1	72243600	72244399	TRUE	Stable	2.37176	0.000931441	3.29846	0.00023823	0.0176156	0.999993
70505	chr1	72254200	72254999	TRUE	Stable	2.59075	0.000321877	2.51346	0.00282938	-0.266121	0.999993
70509	chr1	72306900	72307349	TRUE	Stable	3.98942	6.2734e-07	2.83194	0.000948025	0.0288479	0.999993
70510	chr1	72307500	72308749	TRUE	Stable	3.2002	1.64427e-05	2.49121	0.00306262	0.137908	0.999993
70529	chr1	73363400	73363899	TRUE	Stable	2.28352	0.00141079	1.88313	0.023064	0.0850658	0.999993
70533	chr1	74041300	74041799	TRUE	Stable	4.03817	5.138e-07	2.46487	0.00335794	0.2756	0.999993
70534	chr1	74042050	74042399	TRUE	Stable	2.56742	0.000360414	2.24238	0.00720463	0.161041	0.999993
70537	chr1	74089850	74091449	TRUE	Stable	3.16642	1.92947e-05	2.99962	0.000554509	0.201379	0.999993
70538	chr1	74091500	74091999	TRUE	Stable	2.82851	9.92006e-05	2.33768	0.00521532	0.187624	0.999993
70552	chr1	74391950	74393149	TRUE	Stable	3.3415	8.85867e-06	3.04651	0.000479904	0.278797	0.999993
70556	chr1	74506150	74507899	TRUE	Stable	2.94108	5.70394e-05	3.33818	0.000216409	0.0452716	0.999993
70557	chr1	74587150	74587849	TRUE	Stable	3.12031	2.40594e-05	2.46881	0.00331304	0.412393	0.999993
70558	chr1	74588350	74589049	TRUE	Stable	2.44074	0.000669514	3.0206	0.000519732	0.0303425	0.999993
70587	chr1	75124200	75125749	TRUE	Stable	2.77357	0.000130042	2.52023	0.00276242	-0.0775756	0.999993
70613	chr1	75400000	75400549	TRUE	Stable	2.01944	0.00461634	2.9752	0.000597446	0.152307	0.999993
70626	chr1	75521700	75522349	TRUE	Stable	2.32538	0.00115838	3.30441	0.000234814	-0.0451619	0.999993
70632	chr1	75833100	75833499	TRUE	Stable	2.6855	0.000200849	1.63115	0.0484422	0.168663	0.999993
70638	chr1	77515250	77516999	TRUE	Stable	3.51749	4.14083e-06	3.42881	0.000172617	0.0804313	0.999993
70641	chr1	78189200	78189999	TRUE	Stable	4.10841	4.00969e-07	2.64049	0.00181335	0.223339	0.999993
70647	chr1	78487900	78488799	TRUE	Stable	3.61589	2.76708e-06	3.24285	0.000274181	0.0954989	0.999993
70648	chr1	78489000	78489899	TRUE	Stable	3.16321	1.95658e-05	3.07704	0.000438785	0.0703164	0.999993
70668	chr1	82282900	82283799	TRUE	Stable	3.08826	2.79148e-05	2.69835	0.00149003	0.0745831	0.999993
70672	chr1	82289850	82293449	TRUE	Stable	3.37412	7.64991e-06	3.20801	0.000301852	0.119411	0.999993
70679	chr1	82838900	82839249	TRUE	Stable	2.18735	0.00219892	3.18355	0.000322352	-0.317642	0.999993
70695	chr1	85894000	85896149	TRUE	Stable	3.4222	6.19787e-06	2.86214	0.000856886	0.07797	0.999993
70710	chr1	86440750	86443449	TRUE	Stable	3.59311	3.00703e-06	3.15058	0.000353027	0.0964951	0.999993
70715	chr1	86503150	86504099	TRUE	Stable	2.36386	0.000966728	3.2457	0.000271782	-0.162699	0.999993
70716	chr1	86504450	86504999	TRUE	Stable	3.06733	3.08989e-05	2.48699	0.00310725	0.227188	0.999993
70719	chr1	86525350	86526299	TRUE	Stable	3.44207	5.67291e-06	2.75301	0.00123484	0.189446	0.999993
70726	chr1	86703150	86704049	TRUE	Stable	3.24462	1.33941e-05	2.76303	0.00119335	0.24248	0.999993
70727	chr1	86704150	86704499	TRUE	Stable	2.40985	0.000776016	2.87855	0.000810651	-0.111242	0.999993
70733	chr1	87213200	87213849	TRUE	Stable	2.5934	0.000317697	2.36415	0.0047627	0.131127	0.999993
70734	chr1	87213950	87214299	TRUE	Stable	2.62463	0.000271554	2.46152	0.00339616	0.13195	0.999993
70735	chr1	87214550	87215399	TRUE	Stable	2.80405	0.000111845	3.19099	0.000315029	0.256305	0.999993
70747	chr1	88007800	88008449	TRUE	Stable	2.77565	0.000128705	2.9084	0.000739038	0.015098	0.999993
70748	chr1	88008550	88008899	TRUE	Stable	2.11595	0.00302595	1.98589	0.0167388	0.326685	0.999993
70758	chr1	89070500	89072549	TRUE	Stable	3.17811	1.82772e-05	3.21188	0.000298642	0.117138	0.999993
70760	chr1	89453900	89454649	TRUE	Stable	3.23542	1.39855e-05	3.13966	0.000364856	-0.207443	0.999993
70761	chr1	89454750	89456599	TRUE	Stable	3.28196	1.12901e-05	3.49798	0.000147929	0.155546	0.999993
70792	chr1	91249500	91249999	TRUE	Stable	2.88382	7.56243e-05	3.26773	0.000257202	-0.140222	0.999993
70793	chr1	91250500	91251499	TRUE	Stable	3.16728	1.92097e-05	3.72274	9.34511e-05	0.0187212	0.999993
70798	chr1	91397550	91398599	TRUE	Stable	2.97935	4.73886e-05	2.95046	0.000644073	0.30709	0.999993
70799	chr1	91398750	91399449	TRUE	Stable	2.97025	4.94356e-05	2.47143	0.00328153	0.531582	0.999993
70801	chr1	91413450	91414849	TRUE	Stable	2.86879	8.14991e-05	3.00355	0.000548058	0.0546901	0.999993
70809	chr1	91770550	91771299	TRUE	Stable	3.24391	1.34348e-05	2.1845	0.00874788	0.182988	0.999993
70815	chr1	92180700	92181499	TRUE	Stable	2.83177	9.75378e-05	3.22613	0.000286164	0.0907818	0.999993
70817	chr1	92397700	92397949	TRUE	Stable	1.45626	0.040406	3.19898	0.000308544	0.239556	0.999993
70822	chr1	92790750	92790999	TRUE	Stable	2.1092	0.00311953	2.06257	0.0130904	0.335871	0.999993
70823	chr1	92791450	92791799	TRUE	Stable	2.48621	0.000536955	2.26637	0.00664645	0.250207	0.999993
70824	chr1	92830750	92831199	TRUE	Stable	2.68152	0.00020508	2.58603	0.00219255	-0.0741572	0.999993
70825	chr1	92831750	92833449	TRUE	Stable	3.3186	9.71669e-06	3.2262	0.000286164	0.160011	0.999993
70829	chr1	92933700	92934499	TRUE	Stable	2.6415	0.000249999	2.72268	0.00136961	0.258301	0.999993
70830	chr1	92934700	92936049	TRUE	Stable	2.93579	5.84648e-05	3.45622	0.000163189	0.15251	0.999993
70835	chr1	93176350	93176699	TRUE	Stable	2.27194	0.00148863	2.68057	0.00158288	0.00893373	0.999993
70836	chr1	93177000	93177249	TRUE	Stable	2.45419	0.000626606	2.09575	0.0117527	-0.206847	0.999993
70840	chr1	93342150	93342749	TRUE	Stable	3.13231	2.27207e-05	2.9988	0.000555887	0.0776368	0.999993
70841	chr1	93342800	93343549	TRUE	Stable	3.3416	8.85575e-06	3.07207	0.000445038	0.356546	0.999993
70842	chr1	93343700	93344649	TRUE	Stable	3.05366	3.29804e-05	2.55034	0.00248383	0.148924	0.999993
70843	chr1	93444600	93445299	TRUE	Stable	3.97215	6.73122e-07	2.50338	0.00293427	0.570532	0.999993
70844	chr1	93445650	93445949	TRUE	Stable	2.94205	5.67611e-05	2.27578	0.00643891	0.317134	0.999993
70845	chr1	93477550	93478199	TRUE	Stable	2.63736	0.000255004	2.66821	0.00165138	0.0963477	0.999993
70846	chr1	93479150	93480099	TRUE	Stable	2.78744	0.000121208	2.35774	0.004868	0.0135743	0.999993
70847	chr1	93511250	93511849	TRUE	Stable	2.85544	8.70349e-05	2.55647	0.00243203	0.125056	0.999993
70848	chr1	93512150	93513149	TRUE	Stable	3.27082	1.18547e-05	3.46863	0.000159513	0.146765	0.999993
70850	chr1	93634350	93635649	TRUE	Stable	3.36386	8.04693e-06	2.70648	0.00144988	-0.0412891	0.999993
70855	chr1	93753500	93754699	TRUE	Stable	2.7756	0.000128735	3.29338	0.000240929	-0.00447921	0.999993
70892	chr1	105989550	105990299	TRUE	Stable	3.73438	1.69356e-06	2.8595	0.000864455	0.157925	0.999993
70893	chr1	105990450	105992649	TRUE	Stable	3.39975	6.81623e-06	3.73277	9.10571e-05	0.193769	0.999993
70899	chr1	106712400	106714949	TRUE	Stable	3.22694	1.45015e-05	3.81856	7.72022e-05	0.117624	0.999993
70900	chr1	106758550	106759699	TRUE	Stable	3.71564	1.83804e-06	3.39808	0.000186758	-0.0368325	0.999993
70904	chr1	106796250	106796399	TRUE	Stable	1.59189	0.025146	2.35072	0.00498692	-0.176139	0.999993
70905	chr1	106796800	106797299	TRUE	Stable	2.8488	8.98671e-05	3.64441	0.000109802	0.0320123	0.999993
70916	chr1	118310200	118310949	TRUE	Stable	3.48493	4.72993e-06	2.54319	0.00254866	0.224792	0.999993
70920	chr1	118388400	118389249	TRUE	Stable	2.97572	4.82139e-05	2.5754	0.00227638	-0.0504502	0.999993
70933	chr1	119051250	119053449	TRUE	Stable	3.5218	4.05499e-06	3.1886	0.000317403	0.150988	0.999993
70934	chr1	119053650	119054499	TRUE	Stable	2.99902	4.29548e-05	3.26789	0.000257202	0.251231	0.999993
70942	chr1	119647800	119648999	TRUE	Stable	3.08778	2.79748e-05	3.2765	0.000250938	-0.0472205	0.999993
70960	chr1	120601850	120602849	TRUE	Stable	3.25883	1.25308e-05	3.19781	0.000309612	-0.367246	0.999993
70970	chr1	121327000	121327799	TRUE	Stable	2.94596	5.56734e-05	2.7048	0.00145831	0.325492	0.999993
70971	chr1	121327950	121328799	TRUE	Stable	3.13702	2.22048e-05	2.81124	0.00101732	-0.18745	0.999993
70984	chr1	125436100	125436549	TRUE	Stable	2.58969	0.000323312	2.90027	0.000757846	0.293722	0.999993
70986	chr1	125559900	125560449	TRUE	Stable	4.38506	1.22377e-07	2.84509	0.000908537	0.242268	0.999993
70987	chr1	125561050	125561849	TRUE	Stable	2.62569	0.000270132	2.8657	0.000846727	0.334166	0.999993
70996	chr1	127205150	127206649	TRUE	Stable	3.36396	8.04261e-06	3.16989	0.000334883	0.142878	0.999993
71021	chr1	130715100	130718149	TRUE	Stable	3.31795	9.74395e-06	3.20743	0.000302462	0.0895904	0.999993
71024	chr1	131096100	131097749	TRUE	Stable	3.39154	7.05689e-06	3.41647	0.000178508	-0.0253239	0.999993
71025	chr1	131137350	131139099	TRUE	Stable	3.31616	9.80987e-06	3.57782	0.000124295	-0.209877	0.999993
71037	chr1	131827150	131827849	TRUE	Stable	3.4842	4.74434e-06	3.00788	0.000541036	0.204989	0.999993
71038	chr1	131828100	131829149	TRUE	Stable	3.20781	1.58757e-05	2.79068	0.00108774	-0.0439976	0.999993
71050	chr1	132190150	132191999	TRUE	Stable	3.4391	5.7425e-06	3.32678	0.000222121	0.296157	0.999993
71061	chr1	132476300	132478349	TRUE	Stable	2.65271	0.000236462	3.50599	0.000145698	-0.116654	0.999993
71066	chr1	133024400	133025149	TRUE	Stable	2.62669	0.00026876	3.8879	6.58868e-05	0.0600126	0.999993
71072	chr1	133130500	133131049	TRUE	Stable	3.35504	8.36744e-06	2.07324	0.0126448	0.121214	0.999993
71081	chr1	133363250	133364499	TRUE	Stable	3.60286	2.8981e-06	3.07009	0.000447771	0.19032	0.999993
71088	chr1	133608950	133609749	TRUE	Stable	2.80699	0.000110215	2.56272	0.00237645	-0.26897	0.999993
71094	chr1	133854600	133855249	TRUE	Stable	3.05652	3.25456e-05	1.69868	0.0400234	0.194656	0.999993
71098	chr1	134060700	134060899	TRUE	Stable	2.27493	0.00146809	1.80879	0.0289215	0.304952	0.999993
71099	chr1	134061050	134061649	TRUE	Stable	2.98459	4.62191e-05	2.65371	0.00173279	0.435547	0.999993
71109	chr1	134360850	134361699	TRUE	Stable	3.78126	1.39207e-06	2.61081	0.00201092	0.265875	0.999993
71110	chr1	134362250	134362749	TRUE	Stable	3.36032	8.17335e-06	3.3961	0.0001876	-0.199777	0.999993
71113	chr1	134405650	134406849	TRUE	Stable	3.58789	3.07268e-06	3.22658	0.000285839	0.0719275	0.999993
71114	chr1	134414700	134415199	TRUE	Stable	2.484	0.000542796	3.58454	0.000122501	0.204922	0.999993
71115	chr1	134415900	134416749	TRUE	Stable	2.54677	0.000399199	3.43297	0.000171068	-0.173998	0.999993
71118	chr1	134494100	134494599	TRUE	Stable	3.13976	2.19234e-05	2.6363	0.00184005	0.333806	0.999993
71119	chr1	134494700	134495499	TRUE	Stable	3.73212	1.70541e-06	2.51642	0.00279965	0.162388	0.999993
71146	chr1	135374050	135375399	TRUE	Stable	3.11027	2.5223e-05	2.70051	0.00147937	0.450035	0.999993
71152	chr1	135509650	135510899	TRUE	Stable	3.16205	1.96888e-05	2.54162	0.0025614	0.307213	0.999993
71154	chr1	135579050	135579299	TRUE	Stable	2.95109	5.41847e-05	2.33937	0.00518362	0.475454	0.999993
71155	chr1	135579500	135579849	TRUE	Stable	2.43087	0.000702709	3.76992	8.49157e-05	0.0683523	0.999993
71163	chr1	135765650	135767049	TRUE	Stable	3.33219	9.21331e-06	3.12579	0.000379415	0.0913439	0.999993
71175	chr1	136233650	136234799	TRUE	Stable	3.09488	2.70641e-05	2.74354	0.00127485	0.365429	0.999993
71178	chr1	136345900	136346049	TRUE	Stable	1.47694	0.0376722	2.20084	0.00828759	-0.399551	0.999993
71179	chr1	136346200	136346949	TRUE	Stable	2.99253	4.43731e-05	3.02533	0.000513007	-0.0576105	0.999993
71187	chr1	136588650	136588999	TRUE	Stable	2.19541	0.00211987	2.43155	0.00376405	-0.0819994	0.999993
71188	chr1	136589400	136589499	TRUE	Stable	2.11945	0.00297906	2.22904	0.00753643	0.345248	0.999993
71189	chr1	136624100	136624699	TRUE	Stable	3.78954	1.35178e-06	2.46187	0.00339247	0.468994	0.999993
71190	chr1	136625050	136625999	TRUE	Stable	2.68196	0.000204616	2.67847	0.0015947	-0.0188812	0.999993
71200	chr1	137899550	137900299	TRUE	Stable	2.62072	0.000276672	2.66726	0.00165697	0.0458279	0.999993
71201	chr1	137900450	137901899	TRUE	Stable	2.71129	0.000176699	2.95011	0.000644972	0.0949603	0.999993
71208	chr1	138385250	138385749	TRUE	Stable	2.48224	0.000547792	2.83863	0.000929195	0.0611726	0.999993
71214	chr1	138836700	138838099	TRUE	Stable	2.86552	8.28604e-05	3.05358	0.000469833	-0.41521	0.999993
71215	chr1	138838300	138840049	TRUE	Stable	2.72054	0.000168555	2.90473	0.000747716	-0.22893	0.999993
71223	chr1	138855950	138856399	TRUE	Stable	2.79233	0.000118432	2.93252	0.000682583	0.503028	0.999993
71225	chr1	138963000	138963849	TRUE	Stable	3.82577	1.1622e-06	2.87132	0.000830665	0.160287	0.999993
71226	chr1	138964150	138964749	TRUE	Stable	3.44572	5.59642e-06	3.78531	8.17747e-05	0.303638	0.999993
71228	chr1	139208150	139208249	TRUE	Stable	3.09548	2.69873e-05	3.17116	0.000333633	-0.07568	0.999993
71229	chr1	139421450	139422099	TRUE	Stable	3.03629	3.59162e-05	2.47241	0.0032703	0.310724	0.999993
71230	chr1	139422400	139423399	TRUE	Stable	2.97829	4.76228e-05	2.93292	0.000681842	-0.0130924	0.999993
71239	chr1	143701450	143702599	TRUE	Stable	2.63884	0.000253219	3.13597	0.000368414	-0.064253	0.999993
71240	chr1	143702850	143703649	TRUE	Stable	3.05365	3.29804e-05	3.46467	0.000160673	-0.204883	0.999993
71254	chr1	150681850	150681999	TRUE	Stable	1.77553	0.0126041	2.04264	0.0139604	0.315578	0.999993
71256	chr1	150991450	150993899	TRUE	Stable	3.34013	8.91016e-06	3.22372	0.000288123	-0.00866843	0.999993
71261	chr1	151427300	151428249	TRUE	Stable	3.58135	3.16056e-06	2.75515	0.00122579	0.187067	0.999993
71262	chr1	151428850	151429849	TRUE	Stable	2.52074	0.000453684	2.6936	0.00151401	0.00991284	0.999993
71264	chr1	151501150	151501599	TRUE	Stable	2.85774	8.60672e-05	2.00255	0.0158823	0.0561972	0.999993
71266	chr1	151754650	151755049	TRUE	Stable	2.48988	0.000527665	2.81012	0.00102039	-0.166099	0.999993
71267	chr1	151755450	151756499	TRUE	Stable	3.73315	1.70186e-06	3.311	0.000230301	-0.0168483	0.999993
71269	chr1	152088750	152091399	TRUE	Stable	3.54644	3.66951e-06	3.06316	0.000456342	0.168109	0.999993
71273	chr1	152623200	152625149	TRUE	Stable	3.04082	3.51116e-05	3.04584	0.000480809	0.187609	0.999993
71274	chr1	152625200	152625799	TRUE	Stable	2.39582	0.000829924	2.01519	0.015245	0.207571	0.999993
71284	chr1	153331200	153332799	TRUE	Stable	4.30178	1.71673e-07	3.67712	0.000103222	0.0493706	0.999993
71285	chr1	153333150	153333849	TRUE	Stable	3.30159	1.03772e-05	2.50277	0.00294014	0.363405	0.999993
71297	chr1	153899200	153899599	TRUE	Stable	1.69547	0.0171482	2.57316	0.00229312	0.222596	0.999993
71298	chr1	153900050	153901449	TRUE	Stable	3.25763	1.25988e-05	2.87831	0.000811219	0.0190795	0.999993
71304	chr1	155082600	155083399	TRUE	Stable	3.20218	1.6286e-05	2.91986	0.000711153	0.276488	0.999993
71305	chr1	155083750	155084099	TRUE	Stable	2.23002	0.00180609	2.51837	0.00277998	-0.0446662	0.999993
71316	chr1	155741500	155742099	TRUE	Stable	2.68769	0.000198824	3.13068	0.000373927	-0.236854	0.999993
71317	chr1	155742250	155743349	TRUE	Stable	3.9355	7.6136e-07	3.15331	0.000349957	0.384952	0.999993
71334	chr1	156558300	156558699	TRUE	Stable	3.13397	2.25434e-05	2.07088	0.01274	0.0978314	0.999993
71341	chr1	156717950	156718749	TRUE	Stable	3.2356	1.39855e-05	2.46436	0.00336393	-0.0695051	0.999993
71342	chr1	156719300	156719849	TRUE	Stable	2.79279	0.00011815	2.50622	0.00290458	0.355764	0.999993
71349	chr1	156938150	156940349	TRUE	Stable	3.33322	9.16767e-06	3.25308	0.000266881	0.10932	0.999993
71351	chr1	157411100	157412599	TRUE	Stable	3.54575	3.68061e-06	2.88266	0.000801101	0.142577	0.999993
71352	chr1	157412700	157413349	TRUE	Stable	3.0767	2.95091e-05	2.59569	0.00212117	0.209678	0.999993
71367	chr1	159231450	159231899	TRUE	Stable	3.07905	2.91728e-05	2.46908	0.00331004	0.294645	0.999993
71368	chr1	159232300	159233649	TRUE	Stable	2.84055	9.35291e-05	2.36367	0.00477002	0.201126	0.999993
71375	chr1	160213350	160213949	TRUE	Stable	3.01983	3.88125e-05	2.43795	0.00368523	-0.135068	0.999993
71377	chr1	160791450	160792899	TRUE	Stable	3.57349	3.26783e-06	3.15824	0.000344808	0.136441	0.999993
71378	chr1	160793200	160793549	TRUE	Stable	3.96861	6.78363e-07	2.51362	0.00282825	0.345112	0.999993
71382	chr1	161033650	161034499	TRUE	Stable	3.11941	2.41644e-05	3.07834	0.000436917	-0.21586	0.999993
71416	chr1	162569950	162570349	TRUE	Stable	2.95286	5.37631e-05	2.99605	0.000560913	0.561118	0.999993
71417	chr1	162570700	162571849	TRUE	Stable	3.04276	3.47499e-05	3.28268	0.000247326	0.0452681	0.999993
71424	chr1	163307150	163309199	TRUE	Stable	2.97414	4.85572e-05	3.29697	0.000239387	-0.310799	0.999993
71425	chr1	163309350	163310599	TRUE	Stable	3.25882	1.25308e-05	2.53101	0.00266035	0.0801307	0.999993
71428	chr1	163312800	163313499	TRUE	Stable	3.22727	1.44775e-05	2.26532	0.00666996	0.347869	0.999993
71429	chr1	163313650	163314649	TRUE	Stable	3.49962	4.43844e-06	2.52194	0.00274629	0.260721	0.999993
71430	chr1	163315000	163315549	TRUE	Stable	2.78353	0.000123613	2.37457	0.00459302	0.000705299	0.999993
71431	chr1	163358400	163359399	TRUE	Stable	2.40552	0.000792252	3.24129	0.000275464	-0.392412	0.999993
71432	chr1	163402500	163403399	TRUE	Stable	2.69057	0.000195993	2.8885	0.000787413	-0.256388	0.999993
71433	chr1	163403500	163403649	TRUE	Stable	2.53801	0.00041679	1.67239	0.0431242	0.729346	0.999993
71434	chr1	163403900	163404099	TRUE	Stable	1.78625	0.0120825	2.06621	0.0129306	0.324348	0.999993
71438	chr1	163779700	163780449	TRUE	Stable	2.73345	0.000158631	3.4941	0.000149213	0.259694	0.999993
71462	chr1	165459100	165460949	TRUE	Stable	3.63246	2.58683e-06	2.82654	0.00096605	0.149073	0.999993
71478	chr1	166003100	166003649	TRUE	Stable	2.72826	0.000162661	2.89249	0.0007777	0.128597	0.999993
71481	chr1	166047300	166049299	TRUE	Stable	3.5116	4.22417e-06	2.9056	0.000745692	0.0888188	0.999993
71483	chr1	166282400	166283199	TRUE	Stable	2.64124	0.000250333	1.97229	0.0174751	-0.0553404	0.999993
71490	chr1	167000400	167000749	TRUE	Stable	2.71081	0.000177118	2.71465	0.00140805	0.423227	0.999993
71491	chr1	167000800	167002349	TRUE	Stable	3.61741	2.74892e-06	3.41258	0.000180591	-0.0198488	0.999993
71493	chr1	167283250	167285149	TRUE	Stable	2.74119	0.000152516	3.18464	0.000321394	-0.028317	0.999993
71494	chr1	167285250	167285799	TRUE	Stable	2.31831	0.001198	3.2745	0.000252254	-0.216524	0.999993
71499	chr1	167350000	167351049	TRUE	Stable	3.27628	1.15781e-05	3.11284	0.000395106	-0.0157136	0.999993
71500	chr1	167392950	167394449	TRUE	Stable	3.2441	1.34281e-05	3.58733	0.000122448	0.153353	0.999993
71501	chr1	167498650	167498949	TRUE	Stable	2.66848	0.000218682	2.21882	0.00780648	-0.399219	0.999993
71511	chr1	168391800	168392049	TRUE	Stable	2.80571	0.00011092	3.16264	0.000340934	-0.0832393	0.999993
71513	chr1	168392600	168392749	TRUE	Stable	2.06376	0.00380907	2.08649	0.012108	-0.142764	0.999993
71520	chr1	168432650	168433149	TRUE	Stable	3.16992	1.89751e-05	1.83014	0.0271212	0.454093	0.999993
71524	chr1	168753550	168754149	TRUE	Stable	2.56673	0.000361704	3.42409	0.000174932	-0.214135	0.999993
71527	chr1	169238900	169239149	TRUE	Stable	1.84489	0.0095705	2.75246	0.00123738	-0.324873	0.999993
71537	chr1	170109050	170110799	TRUE	Stable	2.45738	0.000617246	2.87443	0.00082207	0.0667321	0.999993
71538	chr1	170111050	170111499	TRUE	Stable	3.13696	2.2206e-05	2.02626	0.0147146	0.367103	0.999993
71547	chr1	170866850	170868599	TRUE	Stable	3.06554	3.11798e-05	3.48553	0.000152438	0.019038	0.999993
71568	chr1	171149650	171151349	TRUE	Stable	2.8326	9.7178e-05	3.76367	8.60086e-05	0.022653	0.999993
71573	chr1	171246500	171246999	TRUE	Stable	2.70017	0.000186773	2.42748	0.00381866	0.100602	0.999993
71574	chr1	171247300	171247749	TRUE	Stable	2.69	0.000196524	2.32061	0.00552944	-0.0073941	0.999993
71587	chr1	171328150	171329399	TRUE	Stable	3.27309	1.17331e-05	3.00653	0.000543436	0.0883664	0.999993
71588	chr1	171329700	171329949	TRUE	Stable	3.78984	1.34954e-06	2.58618	0.00219124	1.20365	0.999993
71589	chr1	171330000	171331099	TRUE	Stable	3.83133	1.14156e-06	3.09624	0.000414775	0.283674	0.999993
71599	chr1	171503550	171504599	TRUE	Stable	3.56285	3.42704e-06	2.95806	0.000630049	0.311317	0.999993
71608	chr1	172147300	172147849	TRUE	Stable	3.47047	5.03222e-06	1.77067	0.0324023	0.231194	0.999993
71609	chr1	172148250	172148449	TRUE	Stable	2.64325	0.000247854	1.93288	0.019788	0.0822869	0.999993
71625	chr1	172500050	172501049	TRUE	Stable	3.02149	3.84883e-05	3.12263	0.000382843	0.277828	0.999993
71631	chr1	172632500	172633099	TRUE	Stable	2.95048	5.43438e-05	3.39133	0.000189546	0.0220701	0.999993
71650	chr1	176814450	176814649	TRUE	Stable	1.92031	0.00702355	2.49996	0.0029697	0.063581	0.999993
71656	chr1	177258550	177259549	TRUE	Stable	3.7167	1.82556e-06	3.38872	0.000190933	-0.0487963	0.999993
71661	chr1	177518500	177519149	TRUE	Stable	2.71864	0.00017014	2.42981	0.00378693	0.244244	0.999993
71666	chr1	177795750	177796399	TRUE	Stable	3.22436	1.46732e-05	2.69113	0.00152574	0.0426697	0.999993
71671	chr1	178275700	178276899	TRUE	Stable	4.01879	5.48173e-07	3.39312	0.000189414	-0.0706346	0.999993
71674	chr1	178317800	178319049	TRUE	Stable	2.60977	0.000292335	2.77887	0.00113234	0.0782377	0.999993
71675	chr1	178319150	178320399	TRUE	Stable	3.04892	3.37099e-05	3.27216	0.000254255	-0.107447	0.999993
71682	chr1	178405550	178406249	TRUE	Stable	2.59968	0.000307618	3.56499	0.000127913	0.102242	0.999993
71683	chr1	178406550	178406849	TRUE	Stable	3.1103	2.52207e-05	3.05642	0.000466196	0.327573	0.999993
71684	chr1	178527100	178532449	TRUE	Stable	3.57885	3.20277e-06	3.28101	0.000248504	0.125674	0.999993
71691	chr1	179060600	179060949	TRUE	Stable	2.50705	0.000484941	1.71162	0.0385509	-0.481548	0.999993
71754	chr1	181210050	181211399	TRUE	Stable	3.32114	9.61622e-06	2.77522	0.00114449	0.0613907	0.999993
71755	chr1	181212000	181212799	TRUE	Stable	3.08714	2.80674e-05	3.64567	0.000109802	-0.0854594	0.999993
71762	chr1	182019300	182019999	TRUE	Stable	2.76876	0.000133122	1.97853	0.0171294	0.233366	0.999993
71763	chr1	182020400	182020949	TRUE	Stable	4.51109	7.19046e-08	2.77849	0.00113371	0.45563	0.999993
71764	chr1	182125000	182125799	TRUE	Stable	2.63214	0.000261595	2.29519	0.00603414	0.0800244	0.999993
71784	chr1	183145100	183147499	TRUE	Stable	2.84668	9.07816e-05	3.21103	0.00029939	-0.296741	0.999993
71785	chr1	183148100	183148249	TRUE	Stable	1.48371	0.0368117	1.96362	0.0179685	-0.0528408	0.999993
71789	chr1	183188650	183188849	TRUE	Stable	1.43012	0.0441563	2.00546	0.0157314	-0.982495	0.999993
71792	chr1	183296350	183296899	TRUE	Stable	3.37933	7.45174e-06	2.61232	0.00200124	0.223656	0.999993
71793	chr1	183297450	183298699	TRUE	Stable	3.68085	2.13092e-06	3.03774	0.000492818	0.131432	0.999993
71807	chr1	184731650	184733399	TRUE	Stable	4.12753	3.65252e-07	2.90957	0.000736484	0.268236	0.999993
71812	chr1	184998750	185000399	TRUE	Stable	3.00128	4.24738e-05	3.19259	0.000313852	-0.126899	0.999993
71820	chr1	185362250	185362749	TRUE	Stable	2.75758	0.000140728	2.16482	0.00934721	0.215977	0.999993
71821	chr1	185363200	185364499	TRUE	Stable	3.618	2.73951e-06	2.80841	0.00102603	0.2343	0.999993
71823	chr1	185482050	185482449	TRUE	Stable	2.78772	0.000121067	2.48879	0.00308769	-0.0313356	0.999993
71855	chr1	189006550	189007649	TRUE	Stable	2.99666	4.34666e-05	3.48463	0.000152822	0.101378	0.999993
71862	chr1	189727300	189729599	TRUE	Stable	3.60811	2.83863e-06	3.75003	8.81403e-05	0.137851	0.999993
71872	chr1	190927700	190928599	TRUE	Stable	3.48698	4.69235e-06	2.87754	0.000813503	0.348299	0.999993
71873	chr1	190928900	190929749	TRUE	Stable	2.861	8.4739e-05	3.03032	0.000504704	-0.0979371	0.999993
71881	chr1	191097850	191099049	TRUE	Stable	4.12764	3.65252e-07	3.39054	0.000189975	0.393691	0.999993
71893	chr1	191395550	191397149	TRUE	Stable	3.33439	9.12423e-06	2.97274	0.000601396	0.0756578	0.999993
71896	chr1	191576250	191576999	TRUE	Stable	2.83311	9.69449e-05	3.86221	7.06175e-05	-0.0723595	0.999993
71898	chr1	191717500	191718549	TRUE	Stable	3.21255	1.54936e-05	2.87685	0.000814982	0.359112	0.999993
71899	chr1	191718600	191719749	TRUE	Stable	2.7353	0.000157129	3.21192	0.000298612	-0.0547493	0.999993
71900	chr1	191820850	191821399	TRUE	Stable	2.69753	0.000189185	2.50563	0.00291111	-0.151515	0.999993
71901	chr1	191821600	191822499	TRUE	Stable	3.14765	2.11331e-05	2.61935	0.00195314	-0.132728	0.999993
71908	chr1	192136050	192136749	TRUE	Stable	2.75478	0.000142522	2.49811	0.00298948	0.328053	0.999993
71909	chr1	192136800	192137649	TRUE	Stable	3.72955	1.73066e-06	3.44995	0.000164589	0.263744	0.999993
71911	chr1	192138100	192139149	TRUE	Stable	3.93561	7.6136e-07	2.89595	0.000769544	0.0918017	0.999993
71914	chr1	192795950	192796199	TRUE	Stable	1.72983	0.0150589	2.41248	0.00402591	-0.0394344	0.999993
71915	chr1	192798900	192799199	TRUE	Stable	2.00056	0.00500788	1.64993	0.0459444	0.380989	0.999993
71916	chr1	192800050	192800249	TRUE	Stable	2.93879	5.76432e-05	3.19919	0.000308544	-0.260398	0.999993
71917	chr1	192823150	192823249	TRUE	Stable	1.56239	0.027954	2.99083	0.000569813	0.390283	0.999993
71918	chr1	192834600	192835649	TRUE	Stable	3.11148	2.50796e-05	2.46264	0.00338408	-0.0890613	0.999993
71920	chr1	192853950	192856449	TRUE	Stable	3.33808	8.98043e-06	3.18016	0.000324985	0.0174548	0.999993
71922	chr1	193129250	193129949	TRUE	Stable	3.07287	3.00751e-05	2.83959	0.000926536	0.0579382	0.999993
71926	chr1	193172550	193173349	TRUE	Stable	3.10503	2.58175e-05	3.63263	0.000111456	0.155904	0.999993
71927	chr1	193173750	193174299	TRUE	Stable	3.27208	1.17862e-05	2.42959	0.00378921	0.192556	0.999993
71952	chr10	4431500	4432299	TRUE	Stable	3.57584	3.23776e-06	3.79371	8.09446e-05	-0.070024	0.999993
71953	chr10	4432600	4433499	TRUE	Stable	2.32447	0.00116349	3.97574	5.46322e-05	-0.249618	0.999993
71965	chr10	5806200	5806549	TRUE	Stable	2.73202	0.000159666	3.4834	0.000153277	-0.10816	0.999993
71968	chr10	5823150	5823649	TRUE	Stable	3.51277	4.2123e-06	3.50185	0.00014687	0.0742692	0.999993
71969	chr10	5824250	5825099	TRUE	Stable	3.32111	9.61622e-06	3.1229	0.000382593	0.100104	0.999993
71972	chr10	7210050	7213399	TRUE	Stable	3.16507	1.94123e-05	3.39408	0.000188771	-0.018316	0.999993
71976	chr10	7662300	7663249	TRUE	Stable	2.68003	0.000206582	2.43148	0.00376497	0.155181	0.999993
71977	chr10	7663350	7664099	TRUE	Stable	3.21418	1.53937e-05	2.78813	0.00109797	-0.222258	0.999993
71987	chr10	7792150	7792799	TRUE	Stable	3.22043	1.49443e-05	2.99708	0.000559183	0.0593526	0.999993
71988	chr10	7793050	7794099	TRUE	Stable	2.59338	0.000317697	2.84343	0.000914231	0.0167517	0.999993
71991	chr10	7954600	7955549	TRUE	Stable	3.04427	3.45042e-05	3.16316	0.000340576	0.0392756	0.999993
71992	chr10	7956500	7957449	TRUE	Stable	2.93469	5.87345e-05	2.75024	0.0012466	0.217217	0.999993
71993	chr10	8213850	8213999	TRUE	Stable	2.5902	0.000322503	2.97081	0.000605407	-0.500652	0.999993
71994	chr10	8517500	8518999	TRUE	Stable	3.72791	1.73958e-06	3.25301	0.000266939	0.213924	0.999993
72000	chr10	8885050	8886149	TRUE	Stable	3.19222	1.70362e-05	2.64542	0.00178212	-0.0807805	0.999993
72001	chr10	8886250	8887049	TRUE	Stable	2.97029	4.94246e-05	2.46909	0.00331004	0.0369826	0.999993
72006	chr10	9899650	9902149	TRUE	Stable	3.78742	1.36348e-06	3.59835	0.000119188	0.101733	0.999993
72012	chr10	11280200	11281099	TRUE	Stable	3.2971	1.05906e-05	2.83805	0.000930595	0.15634	0.999993
72013	chr10	11281700	11282049	TRUE	Stable	2.16586	0.00242094	1.87074	0.0239831	0.467842	0.999993
72039	chr10	13964450	13968399	TRUE	Stable	3.81576	1.20743e-06	3.90576	6.38204e-05	0.134616	0.999993
72045	chr10	14704050	14705799	TRUE	Stable	2.34069	0.0010783	3.59052	0.000121777	0.0686352	0.999993
72047	chr10	17100750	17101099	TRUE	Stable	1.62731	0.0221121	3.79247	8.09446e-05	-1.0076	0.999993
72048	chr10	17212950	17213099	TRUE	Stable	3.44439	5.61423e-06	2.26183	0.00674851	0.212403	0.999993
72055	chr10	17721450	17722999	TRUE	Stable	3.78539	1.37506e-06	2.93065	0.000686586	0.109291	0.999993
72063	chr10	18021650	18023499	TRUE	Stable	2.59516	0.000314948	3.3913	0.000189546	0.14004	0.999993
72068	chr10	18317950	18320049	TRUE	Stable	3.75856	1.53553e-06	3.2193	0.000292136	0.25794	0.999993
72081	chr10	19104800	19104899	TRUE	Stable	2.76094	0.000138373	1.74556	0.0349033	0.352062	0.999993
72094	chr10	20313150	20313849	TRUE	Stable	3.47352	4.96749e-06	2.86393	0.000852041	-0.0403437	0.999993
72110	chr10	21158500	21161999	TRUE	Stable	3.64462	2.47775e-06	3.67681	0.000103222	0.0841276	0.999993
72125	chr10	22148300	22150949	TRUE	Stable	3.40092	6.78275e-06	3.16332	0.000340576	0.216671	0.999993
72127	chr10	22158300	22159549	TRUE	Stable	2.67767	0.000208914	2.71363	0.00141323	0.321532	0.999993
72128	chr10	22159600	22159849	TRUE	Stable	2.28771	0.00138338	1.9812	0.0169859	0.550192	0.999993
72132	chr10	22644950	22645499	TRUE	Stable	2.57268	0.000350979	1.97162	0.0175148	0.22335	0.999993
72141	chr10	23348050	23349999	TRUE	Stable	3.67931	2.14133e-06	3.41143	0.000181219	-0.0346847	0.999993
72142	chr10	23350150	23351049	TRUE	Stable	3.29832	1.05264e-05	2.25616	0.0068797	0.325201	0.999993
72149	chr10	23785750	23786949	TRUE	Stable	3.27832	1.14682e-05	2.69176	0.00152198	0.238728	0.999993
72150	chr10	23787600	23788649	TRUE	Stable	3.3147	9.85798e-06	3.10776	0.000401164	0.304192	0.999993
72154	chr10	24149300	24150149	TRUE	Stable	2.41384	0.000761292	3.95852	5.67419e-05	-0.334073	0.999993
72175	chr10	25372300	25372499	TRUE	Stable	2.86574	8.27579e-05	1.76004	0.0334441	0.168623	0.999993
72180	chr10	26373150	26374199	TRUE	Stable	3.81865	1.20143e-06	3.35158	0.000208761	-0.0234811	0.999993
72181	chr10	26374250	26374599	TRUE	Stable	3.21477	1.53394e-05	3.61267	0.000115452	0.450676	0.999993
72182	chr10	26375350	26376699	TRUE	Stable	3.55621	3.51436e-06	3.20986	0.000300375	0.0484524	0.999993
72206	chr10	30617600	30618449	TRUE	Stable	4.06993	4.62137e-07	2.79186	0.00108301	0.199738	0.999993
72207	chr10	30618650	30618999	TRUE	Stable	2.25836	0.00158633	2.52995	0.00267011	-0.266517	0.999993
72217	chr10	31445150	31445849	TRUE	Stable	3.28588	1.11032e-05	2.77822	0.00113392	-0.0205708	0.999993
72224	chr10	33950250	33951249	TRUE	Stable	3.00898	4.08289e-05	2.96563	0.000615253	0.12768	0.999993
72225	chr10	33951350	33951649	TRUE	Stable	2.46412	0.000597468	2.71073	0.00142768	-0.138412	0.999993
72240	chr10	36974700	36974999	TRUE	Stable	2.90827	6.70195e-05	2.21662	0.00786537	0.236504	0.999993
72244	chr10	37136650	37136799	TRUE	Stable	1.50812	0.0338306	2.69431	0.0015099	0.441872	0.999993
72245	chr10	37139100	37140949	TRUE	Stable	3.60985	2.83153e-06	3.22464	0.000287383	0.129921	0.999993
72246	chr10	37141350	37141899	TRUE	Stable	2.30553	0.00127179	2.78264	0.0011176	0.348136	0.999993
72247	chr10	37397050	37397999	TRUE	Stable	3.20472	1.60982e-05	2.77026	0.00116399	-0.122407	0.999993
72271	chr10	39730550	39731499	TRUE	Stable	4.03517	5.15986e-07	3.0388	0.000491037	0.377848	0.999993
72274	chr10	39898550	39899199	TRUE	Stable	2.55615	0.000381155	3.48166	0.000154013	-0.0526525	0.999993
72287	chr10	40299850	40301699	TRUE	Stable	3.15314	2.06044e-05	3.04186	0.000486321	-0.151801	0.999993
72289	chr10	40339200	40339399	TRUE	Stable	2.43072	0.000702989	1.89243	0.0224078	-0.12502	0.999993
72290	chr10	40339450	40339749	TRUE	Stable	1.64603	0.0206131	3.12793	0.000377056	-0.335394	0.999993
72305	chr10	41475550	41477949	TRUE	Stable	3.30157	1.03774e-05	3.28981	0.000243072	0.123978	0.999993
72306	chr10	41488900	41490349	TRUE	Stable	3.04115	3.50526e-05	3.00218	0.000550251	0.119833	0.999993
72307	chr10	41490400	41491149	TRUE	Stable	3.29452	1.07083e-05	2.98418	0.000581191	0.136436	0.999993
72308	chr10	41518550	41519149	TRUE	Stable	2.86412	8.34551e-05	2.51948	0.00276906	-0.0423532	0.999993
72309	chr10	41519950	41521449	TRUE	Stable	3.2277	1.44472e-05	3.29391	0.000240706	-0.193244	0.999993
72314	chr10	41808950	41809849	TRUE	Stable	3.04792	3.38817e-05	2.18974	0.00859907	0.172838	0.999993
72315	chr10	41810150	41811649	TRUE	Stable	3.9649	6.78363e-07	3.41877	0.000177247	0.167973	0.999993
72323	chr10	42274250	42277649	TRUE	Stable	3.49539	4.53359e-06	3.41594	0.000178665	0.111743	0.999993
72324	chr10	42277800	42279049	TRUE	Stable	3.26033	1.24427e-05	3.03579	0.000496292	0.181311	0.999993
72327	chr10	42502400	42503449	TRUE	Stable	2.81005	0.000108497	2.64631	0.00177592	0.135604	0.999993
72330	chr10	42614200	42614449	TRUE	Stable	2.19316	0.00214194	2.20199	0.00826019	-0.463979	0.999993
72346	chr10	43220250	43221149	TRUE	Stable	2.78442	0.000123072	2.88427	0.000797531	0.114587	0.999993
72347	chr10	43221650	43222399	TRUE	Stable	3.39217	7.03559e-06	3.08277	0.000431184	-0.0253476	0.999993
72349	chr10	43477500	43480999	TRUE	Stable	3.45413	5.39336e-06	3.10565	0.000403451	0.0357009	0.999993
72351	chr10	43577600	43578999	TRUE	Stable	4.00697	5.71553e-07	2.94053	0.000665603	0.15368	0.999993
72354	chr10	43580250	43580599	TRUE	Stable	2.03256	0.0043617	3.08991	0.000422321	-0.220321	0.999993
72355	chr10	43581000	43581699	TRUE	Stable	2.68957	0.00019695	2.80857	0.00102556	-0.0862347	0.999993
72356	chr10	43723250	43724149	TRUE	Stable	2.93054	5.98556e-05	3.19121	0.000314784	0.296124	0.999993
72358	chr10	43900950	43901599	TRUE	Stable	2.50545	0.000488588	2.3302	0.00534923	-0.0960673	0.999993
72359	chr10	43901850	43902699	TRUE	Stable	3.54525	3.68778e-06	2.92169	0.000706968	-0.0617844	0.999993
72363	chr10	44267400	44268199	TRUE	Stable	2.8427	9.26483e-05	3.63652	0.000110909	-0.0312148	0.999993
72364	chr10	44268650	44269299	TRUE	Stable	2.9347	5.87345e-05	3.01615	0.000526971	0.191463	0.999993
72380	chr10	45467550	45471649	TRUE	Stable	3.20601	1.5999e-05	3.1637	0.000340218	-0.075357	0.999993
72391	chr10	49788250	49789149	TRUE	Stable	3.37137	7.76397e-06	2.99828	0.000556716	0.0651288	0.999993
72410	chr10	52380550	52382099	TRUE	Stable	3.146	2.13109e-05	2.54992	0.00248751	0.104874	0.999993
72411	chr10	52382600	52383099	TRUE	Stable	3.19457	1.68577e-05	2.73294	0.00132155	-0.358003	0.999993
72432	chr10	56114700	56116099	TRUE	Stable	2.81213	0.000107417	3.51704	0.000142498	-0.0989542	0.999993
72438	chr10	56378350	56380199	TRUE	Stable	3.18802	1.73884e-05	3.23014	0.000283721	0.0788347	0.999993
72443	chr10	56920650	56921399	TRUE	Stable	2.57096	0.000354115	3.03313	0.000500647	-0.150582	0.999993
72445	chr10	56979400	56979549	TRUE	Stable	2.29001	0.00136782	1.71209	0.0384972	-0.0853992	0.999993
72469	chr10	59220450	59221349	TRUE	Stable	3.83631	1.11292e-06	3.30805	0.000232052	-0.0370231	0.999993
72470	chr10	59221500	59223449	TRUE	Stable	3.40456	6.6864e-06	3.57805	0.000124276	0.0816233	0.999993
72472	chr10	59322800	59323149	TRUE	Stable	2.2433	0.00170024	2.36466	0.00475439	0.167876	0.999993
72473	chr10	59323400	59325349	TRUE	Stable	3.31741	9.76111e-06	3.27935	0.000249477	0.126089	0.999993
72480	chr10	59878950	59879399	TRUE	Stable	2.76696	0.00013442	2.81976	0.000987556	0.121843	0.999993
72481	chr10	59880050	59880699	TRUE	Stable	3.38303	7.33347e-06	2.9421	0.000661849	0.163395	0.999993
72485	chr10	59920950	59921649	TRUE	Stable	3.23898	1.37598e-05	2.39356	0.00429594	0.255899	0.999993
72487	chr10	59950200	59951799	TRUE	Stable	3.13234	2.27202e-05	3.19448	0.000312302	0.462304	0.999993
72488	chr10	59951950	59953299	TRUE	Stable	3.59702	2.96358e-06	3.04705	0.000479218	0.427612	0.999993
72492	chr10	60002050	60002749	TRUE	Stable	3.18987	1.72138e-05	2.97975	0.000589314	0.215547	0.999993
72493	chr10	60003200	60004049	TRUE	Stable	3.10497	2.58256e-05	2.70005	0.00148155	-0.0674345	0.999993
72499	chr10	60277400	60278549	TRUE	Stable	3.10896	2.53551e-05	3.02392	0.000515171	-0.0347068	0.999993
72505	chr10	60813800	60813999	TRUE	Stable	2.64943	0.0002403	2.82742	0.000962963	-0.00526397	0.999993
72525	chr10	61648050	61648449	TRUE	Stable	2.84284	9.25774e-05	3.47016	0.000158587	0.0744082	0.999993
72526	chr10	61648600	61649749	TRUE	Stable	2.78076	0.000125348	3.49746	0.000148058	-0.0064698	0.999993
72542	chr10	62230550	62231749	TRUE	Stable	3.44352	5.63505e-06	2.49567	0.00301424	0.230673	0.999993
72543	chr10	62339000	62341249	TRUE	Stable	3.02289	3.82622e-05	3.376	0.000195661	0.254555	0.999993
72550	chr10	62577450	62578299	TRUE	Stable	2.94085	5.71158e-05	3.75745	8.6741e-05	-0.112436	0.999993
72555	chr10	62649900	62651049	TRUE	Stable	2.98137	4.69077e-05	2.90367	0.000749363	0.111805	0.999993
72556	chr10	62651650	62652199	TRUE	Stable	2.70343	0.000183781	2.91683	0.000718307	-0.12104	0.999993
72559	chr10	62791050	62791999	TRUE	Stable	2.90963	6.65857e-05	2.60747	0.0020347	0.214728	0.999993
72560	chr10	62792650	62793249	TRUE	Stable	3.10253	2.61413e-05	3.24766	0.000270386	0.106166	0.999993
72563	chr10	62885850	62887499	TRUE	Stable	3.71244	1.85592e-06	3.16494	0.000338884	0.156893	0.999993
72564	chr10	62919800	62920599	TRUE	Stable	3.05636	3.25618e-05	3.66132	0.000106995	0.157652	0.999993
72565	chr10	62920750	62921349	TRUE	Stable	3.08276	2.86692e-05	2.51584	0.00280519	0.301005	0.999993
72572	chr10	63024050	63025249	TRUE	Stable	3.69208	2.02134e-06	3.69299	9.9849e-05	0.00451757	0.999993
72576	chr10	63242850	63243649	TRUE	Stable	2.59794	0.000310513	2.07794	0.0124514	0.165613	0.999993
72578	chr10	63244100	63244949	TRUE	Stable	3.60885	2.83863e-06	2.16409	0.00937019	0.391446	0.999993
72581	chr10	63338550	63338799	TRUE	Stable	2.58894	0.000324484	1.96186	0.0180735	-0.192554	0.999993
72582	chr10	63339150	63339799	TRUE	Stable	2.37921	0.000898239	3.40967	0.000182127	-0.210674	0.999993
72586	chr10	63430450	63430649	TRUE	Stable	1.64921	0.020376	2.36017	0.00482725	-0.437259	0.999993
72597	chr10	67002150	67004049	TRUE	Stable	3.02664	3.75949e-05	3.08389	0.000429446	-0.0353202	0.999993
72598	chr10	67004200	67004849	TRUE	Stable	2.73508	0.000157314	2.87613	0.000817343	0.151782	0.999993
72604	chr10	67185400	67185549	TRUE	Stable	1.44184	0.042424	2.86805	0.000839946	-0.268638	0.999993
72605	chr10	67185650	67186649	TRUE	Stable	2.3691	0.000943292	2.92036	0.000709967	-0.0379496	0.999993
72612	chr10	67547550	67549049	TRUE	Stable	3.31339	9.91303e-06	2.62605	0.00190709	-0.00479773	0.999993
72613	chr10	67549250	67549949	TRUE	Stable	3.22998	1.43063e-05	2.03816	0.0141655	0.172592	0.999993
72624	chr10	68275800	68278549	TRUE	Stable	3.5613	3.44935e-06	3.51666	0.000142618	0.446991	0.999993
72625	chr10	68278700	68280749	TRUE	Stable	3.54876	3.63308e-06	4.11527	3.72386e-05	0.0127404	0.999993
72634	chr10	69212600	69214049	TRUE	Stable	3.25944	1.24903e-05	2.99341	0.000565413	0.0413536	0.999993
72648	chr10	70096100	70096799	TRUE	Stable	3.40791	6.60295e-06	2.66549	0.00166682	0.0728864	0.999993
72659	chr10	71237250	71237949	TRUE	Stable	2.5929	0.000318492	3.03973	0.000489743	0.0898357	0.999993
72660	chr10	71238300	71238499	TRUE	Stable	2.50877	0.000481148	2.43459	0.00372498	0.182364	0.999993
72662	chr10	71343700	71345599	TRUE	Stable	3.58028	3.18026e-06	2.49381	0.00303357	0.17897	0.999993
72663	chr10	71347000	71347549	TRUE	Stable	3.55209	3.57248e-06	2.82784	0.000961881	-0.0193486	0.999993
72664	chr10	71347800	71349149	TRUE	Stable	4.11887	3.86208e-07	3.00928	0.000538804	0.0240882	0.999993
72672	chr10	75036500	75037849	TRUE	Stable	2.67806	0.000208503	2.89458	0.000772312	0.146103	0.999993
72673	chr10	75059750	75060549	TRUE	Stable	2.4119	0.000768542	2.33182	0.00531865	-0.156904	0.999993
72674	chr10	75060900	75062599	TRUE	Stable	3.21946	1.50168e-05	3.24878	0.00027006	-0.0496064	0.999993
72676	chr10	75212400	75213299	TRUE	Stable	3.28358	1.12124e-05	2.74079	0.0012867	0.0785757	0.999993
72689	chr10	75836800	75837299	TRUE	Stable	2.18158	0.00225545	3.69883	9.85964e-05	0.297367	0.999993
72690	chr10	75837650	75838049	TRUE	Stable	2.72448	0.000165338	1.95293	0.0185917	0.0791322	0.999993
72703	chr10	76237050	76238649	TRUE	Stable	2.79171	0.000118751	2.75466	0.00122794	0.290369	0.999993
72763	chr10	78574000	78575599	TRUE	Stable	3.00751	4.11373e-05	2.75891	0.00120862	-0.0923979	0.999993
72783	chr10	79681150	79681749	TRUE	Stable	2.99611	4.35998e-05	2.8363	0.000935868	0.134994	0.999993
72791	chr10	79765650	79766899	TRUE	Stable	3.02231	3.83689e-05	3.28318	0.000247145	0.159258	0.999993
72792	chr10	79767200	79767899	TRUE	Stable	3.23193	1.42053e-05	2.78178	0.00112093	-0.0630869	0.999993
72793	chr10	79777050	79777649	TRUE	Stable	2.79443	0.000117174	2.47532	0.0032359	0.47325	0.999993
72797	chr10	79840800	79841649	TRUE	Stable	2.78602	0.000122128	2.78066	0.00112569	-0.0927562	0.999993
72798	chr10	79852650	79854199	TRUE	Stable	3.32199	9.61622e-06	3.3895	0.000190608	0.228416	0.999993
72803	chr10	79926200	79926999	TRUE	Stable	3.39618	6.92232e-06	3.39318	0.00018939	0.130196	0.999993
72804	chr10	79927400	79929449	TRUE	Stable	3.61555	2.76778e-06	2.62372	0.00192266	-0.0564262	0.999993
72811	chr10	79988200	79989599	TRUE	Stable	3.03306	3.64844e-05	2.9192	0.000712308	0.225861	0.999993
72812	chr10	79989650	79990449	TRUE	Stable	2.84147	9.3153e-05	2.4092	0.00406558	0.344848	0.999993
72819	chr10	80038550	80039549	TRUE	Stable	2.93527	5.86028e-05	3.02634	0.000511506	0.21406	0.999993
72821	chr10	80053750	80054799	TRUE	Stable	3.25736	1.26137e-05	3.20321	0.000305682	0.0537695	0.999993
72828	chr10	80141100	80141899	TRUE	Stable	2.79115	0.000119109	2.61845	0.00195961	-0.0042702	0.999993
72829	chr10	80142350	80143149	TRUE	Stable	3.2569	1.26361e-05	2.81367	0.00100909	0.448777	0.999993
72830	chr10	80147950	80148599	TRUE	Stable	2.84038	9.35789e-05	2.86488	0.000849145	-0.0690882	0.999993
72831	chr10	80149000	80149249	TRUE	Stable	1.57943	0.0263069	2.76514	0.00118492	-0.75864	0.999993
72832	chr10	80150750	80153099	TRUE	Stable	3.19507	1.6829e-05	2.60891	0.0020244	0.216635	0.999993
72838	chr10	80167900	80168199	TRUE	Stable	2.42258	0.000730197	2.4845	0.00313287	-0.219502	0.999993
72839	chr10	80168300	80168949	TRUE	Stable	2.9752	4.83213e-05	2.72906	0.00133947	0.070803	0.999993
72845	chr10	80225850	80226249	TRUE	Stable	1.80966	0.0110172	3.28303	0.000247145	-0.326875	0.999993
72846	chr10	80226850	80227899	TRUE	Stable	3.62752	2.63297e-06	2.89251	0.000777695	0.257041	0.999993
72847	chr10	80248600	80248899	TRUE	Stable	1.88476	0.00813637	2.33905	0.00518852	-0.607094	0.999993
72848	chr10	80249500	80250499	TRUE	Stable	3.10651	2.56471e-05	3.04938	0.000476186	-0.00131747	0.999993
72864	chr10	80385250	80387499	TRUE	Stable	3.61765	2.74588e-06	2.94691	0.000651759	0.26176	0.999993
72865	chr10	80387800	80388449	TRUE	Stable	2.78262	0.00012419	3.13686	0.000367903	-0.116706	0.999993
72866	chr10	80397600	80398749	TRUE	Stable	2.61286	0.000287902	3.33979	0.00021552	-0.0786882	0.999993
72874	chr10	80475450	80475899	TRUE	Stable	2.68574	0.00020062	2.12661	0.0106113	0.388173	0.999993
72877	chr10	80560350	80561349	TRUE	Stable	2.77204	0.000130928	3.34951	0.000209729	-0.21812	0.999993
72878	chr10	80561600	80562549	TRUE	Stable	2.64959	0.000240103	2.7483	0.00125434	0.0127597	0.999993
72882	chr10	80576150	80577449	TRUE	Stable	4.1553	3.31635e-07	3.44614	0.000166162	0.236811	0.999993
72884	chr10	80577850	80578699	TRUE	Stable	2.86237	8.41613e-05	3.54315	0.000134794	0.138467	0.999993
72887	chr10	80603100	80604049	TRUE	Stable	2.874	7.9427e-05	2.22594	0.00761699	0.0789456	0.999993
72889	chr10	80622750	80624449	TRUE	Stable	3.25817	1.25693e-05	2.80809	0.00102727	0.152213	0.999993
72897	chr10	80754700	80754899	TRUE	Stable	2.0062	0.0048868	2.06813	0.0128511	-0.435672	0.999993
72898	chr10	80755550	80756599	TRUE	Stable	3.17313	1.86971e-05	3.12342	0.000382043	0.224974	0.999993
72899	chr10	80797050	80798449	TRUE	Stable	3.2492	1.31122e-05	2.9935	0.00056523	0.162337	0.999993
72900	chr10	80799050	80799999	TRUE	Stable	3.03089	3.68923e-05	2.78151	0.0011221	0.118314	0.999993
72901	chr10	80806950	80807699	TRUE	Stable	3.34167	8.85495e-06	3.61045	0.000115837	0.344183	0.999993
72917	chr10	80935700	80936099	TRUE	Stable	2.10314	0.00320448	3.30833	0.000231936	0.0764077	0.999993
72918	chr10	80936150	80936699	TRUE	Stable	2.57401	0.000348656	2.82932	0.000956962	0.0375306	0.999993
72920	chr10	81036700	81037149	TRUE	Stable	3.35961	8.19809e-06	3.57516	0.000124994	0.211516	0.999993
72930	chr10	81166800	81167499	TRUE	Stable	2.53162	0.000429975	3.53497	0.000136869	-0.119953	0.999993
72931	chr10	81168100	81169849	TRUE	Stable	3.19969	1.64803e-05	2.82953	0.000956196	0.113083	0.999993
72932	chr10	81174400	81175099	TRUE	Stable	2.51115	0.000475691	3.4133	0.000180155	-0.0119496	0.999993
72933	chr10	81176000	81176399	TRUE	Stable	2.39438	0.000835813	2.43666	0.00369941	0.132366	0.999993
72934	chr10	81176950	81177999	TRUE	Stable	3.55222	3.57248e-06	3.58418	0.000122501	0.0652842	0.999993
72942	chr10	81266050	81266649	TRUE	Stable	3.19719	1.66786e-05	2.41164	0.00403661	0.171473	0.999993
72944	chr10	81285900	81286349	TRUE	Stable	3.01365	3.99609e-05	2.50778	0.002887	-0.0594219	0.999993
72946	chr10	81319500	81320649	TRUE	Stable	2.87427	7.9308e-05	3.09796	0.000412877	0.0545048	0.999993
72947	chr10	81321000	81322249	TRUE	Stable	3.01044	4.05856e-05	2.53061	0.00266347	0.05857	0.999993
72963	chr10	81429750	81430799	TRUE	Stable	3.29586	1.06479e-05	3.49169	0.000149787	0.174226	0.999993
72964	chr10	81430950	81431399	TRUE	Stable	3.41191	6.48345e-06	2.59391	0.00213437	0.203923	0.999993
72972	chr10	81568600	81569149	TRUE	Stable	3.25471	1.27715e-05	1.72295	0.0373113	0.646076	0.999993
72974	chr10	81570950	81571649	TRUE	Stable	3.8295	1.14845e-06	2.46866	0.00331454	0.122426	0.999993
72975	chr10	81571900	81572549	TRUE	Stable	2.62896	0.000265831	3.28151	0.000248183	-0.0642095	0.999993
72983	chr10	81627000	81627999	TRUE	Stable	2.83637	9.53895e-05	2.28578	0.00622623	-0.15326	0.999993
73003	chr10	82177800	82179249	TRUE	Stable	2.77204	0.000130928	3.0058	0.000544514	-0.0584997	0.999993
73011	chr10	82629150	82629649	TRUE	Stable	2.78607	0.000122122	3.0556	0.000467286	0.232329	0.999993
73012	chr10	82630200	82631099	TRUE	Stable	3.07358	2.99625e-05	2.89285	0.00077674	-0.0659879	0.999993
73014	chr10	82698600	82698999	TRUE	Stable	3.2072	1.59226e-05	2.4958	0.00301267	0.259124	0.999993
73015	chr10	82699300	82700249	TRUE	Stable	3.08694	2.80938e-05	3.40607	0.00018338	0.0254456	0.999993
73025	chr10	83360350	83361299	TRUE	Stable	2.62795	0.000267157	2.5031	0.00293708	0.0144186	0.999993
73030	chr10	83722300	83722999	TRUE	Stable	2.67255	0.000214273	2.3967	0.00424783	0.102788	0.999993
73031	chr10	83723050	83723899	TRUE	Stable	3.83992	1.10098e-06	3.55745	0.000130183	0.116213	0.999993
73033	chr10	84439700	84440649	TRUE	Stable	3.40255	6.74551e-06	3.39348	0.000189201	0.0231531	0.999993
73034	chr10	84440750	84442149	TRUE	Stable	3.19553	1.68036e-05	3.28719	0.000244613	-0.0354836	0.999993
73046	chr10	84759900	84760799	TRUE	Stable	2.75625	0.00014152	3.25735	0.00026399	0.0785541	0.999993
73049	chr10	84916800	84917049	TRUE	Stable	2.17502	0.00232319	2.83444	0.000940639	-0.0767243	0.999993
73050	chr10	84917600	84918449	TRUE	Stable	3.52915	3.92846e-06	2.33932	0.00518441	0.340242	0.999993
73053	chr10	85101550	85102499	TRUE	Stable	2.76106	0.000138313	3.16065	0.000342686	-0.0944614	0.999993
73054	chr10	85102750	85104149	TRUE	Stable	3.31695	9.7768e-06	2.96571	0.000615253	0.078348	0.999993
73073	chr10	86295800	86296349	TRUE	Stable	3.41597	6.36042e-06	2.55841	0.00241546	-0.303025	0.999993
73080	chr10	86706100	86706999	TRUE	Stable	3.52073	4.07342e-06	3.07899	0.000436057	0.266405	0.999993
73091	chr10	87859550	87860949	TRUE	Stable	2.9072	6.73059e-05	2.57857	0.00225004	0.0655502	0.999993
73092	chr10	87861050	87861399	TRUE	Stable	1.89919	0.00766755	2.23562	0.00737104	-0.500437	0.999993
73093	chr10	87863300	87863899	TRUE	Stable	2.10659	0.00315628	3.42747	0.000173292	-0.174375	0.999993
73105	chr10	88503100	88503849	TRUE	Stable	3.81912	1.19937e-06	3.24553	0.000271804	-0.0970626	0.999993
73108	chr10	88730350	88732649	TRUE	Stable	3.22245	1.4798e-05	3.14698	0.000357183	-0.0799704	0.999993
73137	chr10	91180500	91181499	TRUE	Stable	3.00049	4.26252e-05	2.46296	0.00338026	0.293583	0.999993
73138	chr10	91182000	91183099	TRUE	Stable	3.29139	1.08482e-05	3.0173	0.000524986	0.0981522	0.999993
73148	chr10	93160150	93160699	TRUE	Stable	2.50288	0.000494965	4.05264	4.4201e-05	0.141799	0.999993
73149	chr10	93160750	93161499	TRUE	Stable	2.93224	5.94236e-05	2.40515	0.00412343	-0.0869844	0.999993
73153	chr10	93309750	93311599	TRUE	Stable	2.98613	4.58576e-05	3.0414	0.000487023	-0.0496483	0.999993
73177	chr10	94514150	94515949	TRUE	Stable	3.56861	3.34497e-06	3.64687	0.000109802	0.121188	0.999993
73188	chr10	95414250	95417949	TRUE	Stable	4.06919	4.62683e-07	3.65685	0.000107984	0.0853472	0.999993
73189	chr10	95500950	95501849	TRUE	Stable	3.71539	1.83828e-06	2.52407	0.00272685	0.216511	0.999993
73190	chr10	95514250	95514849	TRUE	Stable	2.96116	5.17372e-05	3.13326	0.000371403	-0.0797353	0.999993
73215	chr10	98913600	98914149	TRUE	Stable	2.80289	0.000112446	3.0909	0.000420749	0.651011	0.999993
73218	chr10	99106500	99106699	TRUE	Stable	2.74826	0.000147206	2.04389	0.013913	-0.284334	0.999993
73219	chr10	99107300	99108899	TRUE	Stable	3.08945	2.77532e-05	3.40212	0.000184744	0.223406	0.999993
73223	chr10	99260800	99262899	TRUE	Stable	3.2718	1.1803e-05	2.78277	0.00111703	0.163699	0.999993
73228	chr10	99268450	99268749	TRUE	Stable	2.53146	0.000430334	1.66397	0.0441752	0.460331	0.999993
73232	chr10	99353500	99353849	TRUE	Stable	2.25773	0.00159101	3.19413	0.000312557	0.221169	0.999993
73239	chr10	100486300	100487199	TRUE	Stable	3.15953	1.99336e-05	2.70773	0.00144349	-0.159703	0.999993
73240	chr10	100487600	100488399	TRUE	Stable	4.09365	4.25451e-07	2.50557	0.00291168	0.162367	0.999993
73250	chr10	103026500	103028849	TRUE	Stable	3.29039	1.08864e-05	4.174	3.13518e-05	-0.101571	0.999993
73267	chr10	108161150	108161899	TRUE	Stable	2.40633	0.000789556	3.17156	0.000333633	-0.428459	0.999993
73269	chr10	108331250	108333849	TRUE	Stable	3.45773	5.31303e-06	3.83763	7.36489e-05	0.070945	0.999993
73281	chr10	111008600	111009799	TRUE	Stable	3.90839	8.43838e-07	2.85494	0.00087857	0.0614286	0.999993
73282	chr10	111010150	111011649	TRUE	Stable	3.86937	9.82382e-07	3.07999	0.000434639	0.224057	0.999993
73294	chr10	111505650	111506299	TRUE	Stable	2.87875	7.75297e-05	2.68806	0.00154278	0.22105	0.999993
73295	chr10	111506400	111508349	TRUE	Stable	3.62827	2.63034e-06	3.32432	0.000223347	0.190597	0.999993
73314	chr10	115250250	115251349	TRUE	Stable	3.06628	3.10575e-05	2.50222	0.00294607	-0.1231	0.999993
73315	chr10	115251450	115251599	TRUE	Stable	1.98024	0.00546532	2.52235	0.00274258	0.306454	0.999993
73316	chr10	115251650	115252599	TRUE	Stable	3.23698	1.38878e-05	3.11268	0.000395356	0.108444	0.999993
73320	chr10	115361650	115362199	TRUE	Stable	2.90114	6.93518e-05	4.19719	2.90282e-05	-0.149548	0.999993
73321	chr10	115362450	115363099	TRUE	Stable	3.49483	4.55042e-06	3.46044	0.000161694	-0.131864	0.999993
73323	chr10	115383150	115384199	TRUE	Stable	3.02443	3.79894e-05	3.27033	0.000255458	-0.0596396	0.999993
73324	chr10	115384250	115384399	TRUE	Stable	2.57946	0.000339306	1.77682	0.0318227	0.272633	0.999993
73338	chr10	116582000	116582949	TRUE	Stable	3.00984	4.06998e-05	3.17841	0.000326512	-0.0238917	0.999993
73341	chr10	116948850	116950299	TRUE	Stable	3.37256	7.71926e-06	3.62541	0.000112904	0.0609725	0.999993
73364	chr10	117584250	117584499	TRUE	Stable	2.21501	0.00193585	2.44629	0.00358143	0.605755	0.999993
73366	chr10	117628750	117630149	TRUE	Stable	3.52974	3.92705e-06	3.26319	0.000260489	0.160913	0.999993
73369	chr10	117669500	117669849	TRUE	Stable	3.52503	4.01144e-06	1.91181	0.0211299	-0.452425	0.999993
73371	chr10	117709450	117710199	TRUE	Stable	3.10801	2.54628e-05	3.47587	0.000156346	-0.0750243	0.999993
73383	chr10	118869400	118870599	TRUE	Stable	2.89504	7.15807e-05	3.39791	0.000186851	0.0763679	0.999993
73404	chr10	120473150	120473999	TRUE	Stable	2.64451	0.000246265	4.11816	3.72386e-05	-0.0708381	0.999993
73405	chr10	120474100	120474899	TRUE	Stable	3.04553	3.4289e-05	2.62599	0.00190743	0.142006	0.999993
73406	chr10	120475000	120475599	TRUE	Stable	2.60258	0.000303053	2.84749	0.000901419	-0.259843	0.999993
73407	chr10	120476250	120478299	TRUE	Stable	3.63314	2.58247e-06	2.91001	0.000735298	0.248996	0.999993
73408	chr10	120551550	120553399	TRUE	Stable	3.70704	1.9073e-06	3.50159	0.000146902	0.12768	0.999993
73423	chr10	120898200	120899599	TRUE	Stable	3.67323	2.20711e-06	2.88758	0.000789111	0.232631	0.999993
73438	chr10	121436150	121436399	TRUE	Stable	2.1653	0.00242705	2.34183	0.00514123	-0.550269	0.999993
73441	chr10	121474300	121476249	TRUE	Stable	3.30738	1.01465e-05	3.23258	0.000282458	0.119496	0.999993
73442	chr10	121476500	121476899	TRUE	Stable	2.41297	0.000764625	2.25303	0.00695481	0.403621	0.999993
73450	chr10	121624950	121626199	TRUE	Stable	3.41364	6.43507e-06	3.18381	0.0003221	0.107462	0.999993
73451	chr10	121626700	121626999	TRUE	Stable	2.96594	5.05492e-05	1.87813	0.02344	0.353442	0.999993
73466	chr10	122886400	122886749	TRUE	Stable	3.45728	5.32034e-06	2.53028	0.00266699	0.553263	0.999993
73467	chr10	122887050	122887899	TRUE	Stable	2.03296	0.00435412	3.12751	0.000377621	0.306719	0.999993
73470	chr10	122912850	122913399	TRUE	Stable	2.8695	8.12372e-05	1.63856	0.0474708	0.431941	0.999993
73474	chr10	122986050	122986999	TRUE	Stable	2.75477	0.000142522	1.98372	0.016859	-0.045329	0.999993
73476	chr10	123076600	123076999	TRUE	Stable	3.82179	1.18981e-06	3.01219	0.000533985	0.354454	0.999993
73477	chr10	123195200	123196649	TRUE	Stable	3.1371	2.21979e-05	2.86136	0.000859293	0.148701	0.999993
73478	chr10	123197150	123197849	TRUE	Stable	2.87581	7.87093e-05	2.82663	0.000965835	-0.0489366	0.999993
73484	chr10	125786300	125786549	TRUE	Stable	2.97697	4.79474e-05	1.74339	0.0351281	0.296498	0.999993
73485	chr10	125787100	125787399	TRUE	Stable	2.50855	0.000481506	2.00356	0.0158321	0.358843	0.999993
73491	chr10	125967050	125967849	TRUE	Stable	2.36285	0.000971199	2.87515	0.000820157	-0.106814	0.999993
73492	chr10	125967950	125969499	TRUE	Stable	2.94048	5.7231e-05	2.96553	0.000615269	0.0393629	0.999993
73493	chr10	125969700	125969949	TRUE	Stable	2.0524	0.00400258	2.36623	0.00472742	-0.46663	0.999993
73494	chr10	125970200	125970499	TRUE	Stable	2.22543	0.00184511	3.51459	0.000143348	-0.235967	0.999993
73498	chr10	126029600	126029849	TRUE	Stable	1.76707	0.0130303	1.90064	0.0218551	0.190781	0.999993
73506	chr10	126978000	126978499	TRUE	Stable	2.19609	0.00211328	3.33492	0.000218274	-0.176114	0.999993
73507	chr10	126978650	126978899	TRUE	Stable	4.18715	2.93477e-07	1.98653	0.0167033	1.23047	0.999993
73508	chr10	126979100	126979749	TRUE	Stable	2.95206	5.39613e-05	2.06885	0.0128206	0.148845	0.999993
73509	chr10	126979850	126981349	TRUE	Stable	2.78042	0.000125585	3.25162	0.00026813	0.0421942	0.999993
73510	chr10	127029950	127030749	TRUE	Stable	2.31231	0.0012313	3.00555	0.000544956	0.201602	0.999993
73511	chr10	127040750	127042949	TRUE	Stable	3.81538	1.20833e-06	3.61875	0.000114523	0.0437704	0.999993
73516	chr10	127063700	127064949	TRUE	Stable	2.67766	0.000208914	2.08623	0.0121176	0.00418519	0.999993
73529	chr10	127187650	127188399	TRUE	Stable	4.1861	2.93477e-07	3.16611	0.000338229	0.285625	0.999993
73530	chr10	127188450	127190399	TRUE	Stable	3.71851	1.81437e-06	3.30162	0.000236401	0.0619006	0.999993
73538	chr10	127287600	127288649	TRUE	Stable	3.62244	2.68876e-06	3.0005	0.000552986	0.109638	0.999993
73539	chr10	127289200	127290399	TRUE	Stable	2.38918	0.000856746	3.56959	0.00012685	-0.211925	0.999993
73540	chr10	127290750	127291999	TRUE	Stable	3.1103	2.52207e-05	3.26518	0.00025873	-0.0142882	0.999993
73544	chr10	127339400	127340099	TRUE	Stable	3.90956	8.42955e-07	3.72738	9.24224e-05	0.599733	0.999993
73545	chr10	127340150	127341049	TRUE	Stable	3.07129	3.0314e-05	1.94968	0.0187774	1.19299	0.999993
73546	chr10	127341600	127341999	TRUE	Stable	4.71661	3.45245e-08	1.9923	0.0164081	-0.0314877	0.999993
73551	chr10	127509100	127509849	TRUE	Stable	3.00842	4.09354e-05	2.65344	0.00173435	0.0349625	0.999993
73553	chr10	127511400	127512449	TRUE	Stable	2.861	8.4739e-05	3.29354	0.000240878	0.173414	0.999993
73559	chr10	127521500	127522449	TRUE	Stable	3.15255	2.06624e-05	3.06057	0.000460149	0.19587	0.999993
73568	chr10	127619400	127621049	TRUE	Stable	3.12967	2.30052e-05	3.0824	0.000431603	0.0377617	0.999993
73569	chr10	127621300	127622549	TRUE	Stable	3.56706	3.36719e-06	3.03114	0.000503693	0.30595	0.999993
73572	chr10	127664950	127667649	TRUE	Stable	3.4563	5.33849e-06	3.26609	0.000258194	0.2988	0.999993
73573	chr10	127667900	127669149	TRUE	Stable	3.01136	4.04126e-05	2.92317	0.000703615	0.121838	0.999993
73574	chr10	127676300	127676849	TRUE	Stable	3.00763	4.1115e-05	3.42273	0.000175271	0.286621	0.999993
73575	chr10	127677150	127678149	TRUE	Stable	3.27486	1.16463e-05	3.70719	9.77057e-05	0.19396	0.999993
73581	chr10	128058150	128058799	TRUE	Stable	3.40958	6.5438e-06	3.15781	0.00034533	-0.156819	0.999993
73582	chr10	128059400	128061149	TRUE	Stable	3.00033	4.26638e-05	3.28663	0.000244822	0.0407955	0.999993
73589	chr10	128097200	128098499	TRUE	Stable	3.1518	2.07301e-05	2.60404	0.00206014	0.268954	0.999993
73598	chr10	128231200	128231949	TRUE	Stable	3.57943	3.19193e-06	2.81094	0.00101826	0.438232	0.999993
73599	chr10	128232400	128233399	TRUE	Stable	3.09864	2.66084e-05	2.42874	0.00380086	0.0280706	0.999993
73602	chr10	128302450	128303149	TRUE	Stable	3.47997	4.83545e-06	3.51033	0.000144264	-0.201324	0.999993
73603	chr10	128303400	128304499	TRUE	Stable	2.3692	0.000942898	3.35379	0.000208064	-0.016093	0.999993
73604	chr10	128321850	128322349	TRUE	Stable	2.71864	0.00017014	2.72495	0.00135806	0.23737	0.999993
73605	chr10	128322600	128323949	TRUE	Stable	2.76591	0.000135163	3.13577	0.000368574	-0.0375758	0.999993
73611	chr10	128408850	128409749	TRUE	Stable	3.10335	2.60469e-05	3.27487	0.00025205	0.00374273	0.999993
73612	chr10	128410100	128411649	TRUE	Stable	2.76581	0.000135234	3.49972	0.000147448	0.0295867	0.999993
73620	chr10	128498450	128498649	TRUE	Stable	2.55356	0.000386009	2.04032	0.0140668	0.543611	0.999993
73621	chr10	128498950	128499699	TRUE	Stable	3.43571	5.82923e-06	2.84307	0.00091558	0.239492	0.999993
73622	chr10	128524600	128526049	TRUE	Stable	4.14523	3.39989e-07	4.36688	1.60499e-05	0.137712	0.999993
73623	chr10	128526200	128526749	TRUE	Stable	2.08205	0.00351572	2.17603	0.00900197	-0.0705727	0.999993
73636	chr10	128695150	128695899	TRUE	Stable	3.12133	2.39312e-05	3.0559	0.000466791	0.229667	0.999993
73643	chr10	128803350	128805399	TRUE	Stable	3.02738	3.74623e-05	3.17984	0.000325155	0.116796	0.999993
73644	chr10	128805900	128806499	TRUE	Stable	3.81976	1.19937e-06	2.67011	0.0016403	0.415285	0.999993
73647	chr10	128888600	128888749	TRUE	Stable	1.72773	0.0151743	1.89342	0.0223397	-0.160615	0.999993
73648	chr10	128888800	128888999	TRUE	Stable	1.79227	0.0118114	2.8606	0.000861305	-0.4251	0.999993
73649	chr10	128889500	128890399	TRUE	Stable	3.65306	2.3832e-06	3.05811	0.000463349	0.422869	0.999993
73650	chr10	128890450	128891249	TRUE	Stable	3.49928	4.44747e-06	3.0288	0.000507218	0.4146	0.999993
73654	chr10	128909350	128910299	TRUE	Stable	3.0757	2.96597e-05	2.7662	0.00118082	0.32769	0.999993
73656	chr10	128922500	128924049	TRUE	Stable	3.00018	4.26965e-05	3.14985	0.000353532	0.0497713	0.999993
73661	chr11	3202950	3203799	TRUE	Stable	3.6314	2.59814e-06	2.96005	0.000625987	0.137681	0.999993
73662	chr11	3264400	3266149	TRUE	Stable	2.89077	7.30965e-05	3.41775	0.000177646	-0.205961	0.999993
73663	chr11	3266750	3267399	TRUE	Stable	3.03307	3.64839e-05	2.46246	0.00338543	0.0524021	0.999993
73664	chr11	3288150	3289449	TRUE	Stable	4.34075	1.50337e-07	2.96773	0.0006114	0.0840461	0.999993
73665	chr11	3290300	3293849	TRUE	Stable	3.47267	4.98647e-06	3.17874	0.000326255	0.126167	0.999993
73668	chr11	3374150	3374549	TRUE	Stable	2.14671	0.00263869	2.81697	0.000997455	0.0314622	0.999993
73669	chr11	3374700	3374899	TRUE	Stable	2.02871	0.00443744	1.85473	0.0251876	-0.454114	0.999993
73670	chr11	3408150	3409399	TRUE	Stable	3.54194	3.73007e-06	2.70442	0.0014601	0.0183241	0.999993
73671	chr11	3451300	3452349	TRUE	Stable	3.67892	2.14471e-06	3.2937	0.000240786	0.208745	0.999993
73672	chr11	3452450	3453349	TRUE	Stable	3.64492	2.47509e-06	3.27605	0.000251183	0.19581	0.999993
73684	chr11	3894550	3895049	TRUE	Stable	2.51328	0.00047071	2.70572	0.00145383	0.181389	0.999993
73685	chr11	3895250	3895799	TRUE	Stable	2.94426	5.61463e-05	2.51173	0.00284682	0.258618	0.999993
73689	chr11	3963650	3963949	TRUE	Stable	3.40342	6.71575e-06	2.44082	0.00364757	0.432596	0.999993
73690	chr11	3964000	3965249	TRUE	Stable	3.29894	1.04919e-05	2.94901	0.000647428	0.171389	0.999993
73695	chr11	4096300	4096599	TRUE	Stable	2.68885	0.000197721	3.40871	0.000182351	0.27757	0.999993
73696	chr11	4096950	4097549	TRUE	Stable	3.41307	6.45067e-06	3.15293	0.000350478	0.088054	0.999993
73699	chr11	4159700	4160199	TRUE	Stable	2.93989	5.73748e-05	2.34327	0.00511742	-0.0533127	0.999993
73700	chr11	4160700	4161799	TRUE	Stable	2.73245	0.000159414	3.35774	0.000205309	0.0736956	0.999993
73705	chr11	4308500	4308849	TRUE	Stable	2.1873	0.00219928	2.72069	0.00137913	0.145163	0.999993
73715	chr11	4848150	4849349	TRUE	Stable	3.02971	3.70593e-05	2.38648	0.004404	0.326005	0.999993
73716	chr11	4849700	4850049	TRUE	Stable	2.88573	7.4874e-05	2.11143	0.0111597	0.146211	0.999993
73722	chr11	5061400	5062349	TRUE	Stable	3.15465	2.04543e-05	2.86762	0.000841275	0.109618	0.999993
73723	chr11	5064450	5065749	TRUE	Stable	3.49972	4.43844e-06	2.60039	0.00208632	0.281594	0.999993
73729	chr11	5260650	5261399	TRUE	Stable	3.03374	3.63724e-05	3.19747	0.000310008	0.143562	0.999993
73730	chr11	5261850	5262449	TRUE	Stable	2.3634	0.000968829	2.74007	0.00129025	0.236288	0.999993
73733	chr11	5442800	5444799	TRUE	Stable	3.03563	3.60276e-05	3.06191	0.000458272	0.0237459	0.999993
73734	chr11	5445100	5445749	TRUE	Stable	3.32463	9.51954e-06	2.62443	0.0019181	0.347048	0.999993
73743	chr11	5761550	5762149	TRUE	Stable	2.92635	6.11953e-05	3.13833	0.0003663	0.025553	0.999993
73744	chr11	5762450	5762899	TRUE	Stable	2.79775	0.00011533	4.00564	5.02601e-05	-0.0613901	0.999993
73745	chr11	5787550	5788399	TRUE	Stable	3.44212	5.67291e-06	3.09368	0.00041785	0.250328	0.999993
73746	chr11	5788700	5789399	TRUE	Stable	2.91589	6.44985e-05	3.30658	0.000233103	0.122422	0.999993
73759	chr11	6266800	6267749	TRUE	Stable	3.47776	4.87901e-06	2.79204	0.00108243	0.125197	0.999993
73760	chr11	6267900	6268349	TRUE	Stable	2.98481	4.61704e-05	2.49362	0.00303562	0.114413	0.999993
73766	chr11	6415000	6415499	TRUE	Stable	2.07776	0.00358238	2.84544	0.000907437	-0.084176	0.999993
73767	chr11	6416100	6416399	TRUE	Stable	2.38167	0.000888061	1.71374	0.0383322	-0.354711	0.999993
73768	chr11	6416450	6417999	TRUE	Stable	2.88432	7.54285e-05	3.26222	0.000261308	0.0460158	0.999993
73769	chr11	6443150	6444099	TRUE	Stable	2.79531	0.000116693	2.97842	0.000591511	0.249763	0.999993
73770	chr11	6444750	6445349	TRUE	Stable	2.86094	8.47582e-05	2.31579	0.0056254	0.260417	0.999993
73774	chr11	6546050	6546749	TRUE	Stable	3.61212	2.80109e-06	2.96278	0.000620221	0.803474	0.999993
73775	chr11	6547250	6548349	TRUE	Stable	2.99952	4.28329e-05	3.04992	0.000475488	-0.0448476	0.999993
73790	chr11	8623150	8625249	TRUE	Stable	3.06972	3.05582e-05	3.27119	0.000254736	0.1701	0.999993
73809	chr11	11809050	11809499	TRUE	Stable	2.7584	0.000140169	2.80782	0.00102819	-0.217528	0.999993
73832	chr11	17210750	17211349	TRUE	Stable	3.3345	9.11977e-06	3.2798	0.000249212	0.174865	0.999993
73833	chr11	17211900	17212749	TRUE	Stable	3.29137	1.08482e-05	2.84756	0.00090131	0.34117	0.999993
73841	chr11	18759100	18759399	TRUE	Stable	2.82426	0.000101311	2.51314	0.00283261	-0.537765	0.999993
73869	chr11	19923700	19924049	TRUE	Stable	2.80306	0.000112368	1.84374	0.0260438	-0.188377	0.999993
73870	chr11	19924300	19926499	TRUE	Stable	2.96491	5.0785e-05	3.13759	0.000367318	0.242464	0.999993
73886	chr11	20541900	20542599	TRUE	Stable	3.53369	3.86046e-06	3.31513	0.000228525	0.268139	0.999993
73887	chr11	20543250	20544499	TRUE	Stable	3.05563	3.26828e-05	3.0266	0.000511013	0.211803	0.999993
73896	chr11	20740250	20741499	TRUE	Stable	3.76132	1.51259e-06	3.04649	0.000479904	0.190097	0.999993
73897	chr11	20741850	20742749	TRUE	Stable	3.36132	8.13488e-06	3.48752	0.000151428	-0.151017	0.999993
73902	chr11	21238350	21238999	TRUE	Stable	3.27499	1.16435e-05	3.21448	0.000296057	-0.103483	0.999993
73903	chr11	21239150	21239549	TRUE	Stable	2.16923	0.00238335	1.86773	0.0242115	0.270346	0.999993
73906	chr11	21369500	21370749	TRUE	Stable	3.9822	6.46555e-07	2.98091	0.000586754	0.151691	0.999993
73907	chr11	21371300	21371649	TRUE	Stable	1.91162	0.00728024	2.85567	0.000876534	-0.118802	0.999993
73912	chr11	22000650	22002499	TRUE	Stable	3.22249	1.47978e-05	3.18532	0.000320634	0.0560441	0.999993
73924	chr11	22858800	22859749	TRUE	Stable	3.30193	1.03731e-05	2.94327	0.00065914	0.00426827	0.999993
73925	chr11	22859800	22860949	TRUE	Stable	3.31456	9.86288e-06	3.72561	9.2951e-05	0.128004	0.999993
73930	chr11	22981150	22981899	TRUE	Stable	2.60803	0.000294966	2.91989	0.000711078	0.161206	0.999993
73931	chr11	22982450	22982949	TRUE	Stable	2.01603	0.00468538	2.96515	0.000616065	-0.126872	0.999993
73934	chr11	23007400	23008999	TRUE	Stable	3.39083	7.07427e-06	3.13215	0.000372425	-0.0742131	0.999993
73942	chr11	23305550	23306199	TRUE	Stable	3.10022	2.64227e-05	2.37385	0.00460406	-0.0312275	0.999993
73943	chr11	23307000	23307299	TRUE	Stable	2.19208	0.00215252	2.78398	0.00111217	-0.079613	0.999993
73944	chr11	23307500	23307949	TRUE	Stable	2.43673	0.000682631	2.94466	0.000656052	-0.0271434	0.999993
73948	chr11	23632750	23633399	TRUE	Stable	3.80391	1.27644e-06	2.2275	0.00757479	-0.0393277	0.999993
73949	chr11	23633950	23634149	TRUE	Stable	2.02133	0.0045828	2.91429	0.00072471	-0.619267	0.999993
73951	chr11	23666400	23667399	TRUE	Stable	2.62819	0.000266864	2.71521	0.00140642	-0.119905	0.999993
73953	chr11	23769800	23770999	TRUE	Stable	3.53666	3.80862e-06	3.71211	9.64838e-05	0.229228	0.999993
73954	chr11	23771200	23771949	TRUE	Stable	3.30462	1.02579e-05	2.94413	0.000657287	0.417943	0.999993
73961	chr11	24073800	24077649	TRUE	Stable	3.70305	1.94174e-06	3.63866	0.000110705	0.111322	0.999993
73963	chr11	24078850	24082399	TRUE	Stable	3.39459	6.97761e-06	2.97409	0.000599026	0.236832	0.999993
73986	chr11	28365050	28366099	TRUE	Stable	2.66095	0.000226896	1.83712	0.026565	0.252736	0.999993
74003	chr11	29525850	29527299	TRUE	Stable	2.87911	7.7395e-05	3.46613	0.000160256	0.105362	0.999993
74005	chr11	29548100	29549049	TRUE	Stable	3.40892	6.56929e-06	3.38525	0.000192372	-0.0573845	0.999993
74006	chr11	29692400	29692549	TRUE	Stable	2.10567	0.00316804	2.84471	0.000909872	-0.284204	0.999993
74007	chr11	29693000	29693249	TRUE	Stable	2.17502	0.00232319	1.83587	0.0266594	-0.288937	0.999993
74016	chr11	30266700	30268049	TRUE	Stable	3.19842	1.65697e-05	3.23794	0.000277921	0.219113	0.999993
74017	chr11	30268300	30268999	TRUE	Stable	2.76114	0.00013827	4.05202	4.42015e-05	-0.109005	0.999993
74034	chr11	31671200	31671699	TRUE	Stable	2.43753	0.000680076	2.16046	0.00947311	-0.0161024	0.999993
74035	chr11	31672100	31672749	TRUE	Stable	2.7609	0.000138393	3.01017	0.00053718	0.213648	0.999993
74052	chr11	32347300	32349049	TRUE	Stable	2.79023	0.000119635	2.9601	0.000625869	0.0948818	0.999993
74053	chr11	32454300	32454999	TRUE	Stable	2.85219	8.83769e-05	2.69743	0.00149424	0.531457	0.999993
74054	chr11	32455400	32456999	TRUE	Stable	3.25182	1.29569e-05	2.80064	0.00105271	0.00857754	0.999993
74057	chr11	32641850	32642399	TRUE	Stable	3.09319	2.72651e-05	2.89151	0.000780081	0.207112	0.999993
74067	chr11	33163600	33163949	TRUE	Stable	2.33706	0.00109647	3.14889	0.000354841	0.0157924	0.999993
74076	chr11	34832700	34833049	TRUE	Stable	3.34388	8.76534e-06	3.02666	0.000510915	-0.0899307	0.999993
74077	chr11	34833150	34833449	TRUE	Stable	3.75089	1.58403e-06	1.96006	0.0181789	-0.274802	0.999993
74078	chr11	34833800	34834549	TRUE	Stable	3.20522	1.60629e-05	3.35322	0.000208096	-0.0905587	0.999993
74081	chr11	35121100	35122949	TRUE	Stable	3.42955	5.99324e-06	3.52643	0.0001402	0.21414	0.999993
74093	chr11	35838500	35838949	TRUE	Stable	1.67172	0.0187447	2.6802	0.00158514	-0.0866762	0.999993
74109	chr11	40395050	40395299	TRUE	Stable	2.90305	6.87023e-05	2.1134	0.0110869	-0.059229	0.999993
74128	chr11	43528200	43530099	TRUE	Stable	3.02239	3.8354e-05	3.45935	0.000161986	0.116513	0.999993
74138	chr11	44469650	44470449	TRUE	Stable	2.49198	0.000522234	3.92283	6.13848e-05	-0.0303626	0.999993
74139	chr11	44470700	44471899	TRUE	Stable	3.18359	1.7769e-05	2.85703	0.000872393	0.258258	0.999993
74140	chr11	44518350	44519049	TRUE	Stable	3.54235	3.72411e-06	2.51468	0.00281806	0.270077	0.999993
74141	chr11	44519400	44521149	TRUE	Stable	3.54181	3.73267e-06	3.5539	0.000130971	0.03052	0.999993
74153	chr11	45514100	45514299	TRUE	Stable	1.52927	0.031431	2.86805	0.000839946	-0.490201	0.999993
74168	chr11	46437100	46438049	TRUE	Stable	2.97047	4.93717e-05	2.4313	0.00376667	0.0144293	0.999993
74178	chr11	48816100	48816749	TRUE	Stable	2.69364	0.000192966	2.91893	0.000713024	0.354364	0.999993
74196	chr11	49243300	49243799	TRUE	Stable	2.75886	0.000139828	3.46763	0.000159757	-0.182238	0.999993
74197	chr11	49244500	49244899	TRUE	Stable	1.96852	0.00574321	2.84663	0.000903847	0.0609164	0.999993
74228	chr11	50376550	50377449	TRUE	Stable	3.55864	3.48455e-06	3.31954	0.000225948	0.125294	0.999993
74233	chr11	50430250	50431199	TRUE	Stable	2.90758	6.71785e-05	2.81667	0.000998613	0.0380198	0.999993
74234	chr11	50431300	50431549	TRUE	Stable	3.02514	3.78729e-05	2.42492	0.00385444	0.193067	0.999993
74237	chr11	50622300	50622649	TRUE	Stable	2.79433	0.000117215	2.42907	0.00379622	0.428607	0.999993
74249	chr11	51262300	51262999	TRUE	Stable	2.89357	7.21209e-05	3.15077	0.000352909	-0.152527	0.999993
74250	chr11	51263500	51264699	TRUE	Stable	2.55131	0.00039034	2.52005	0.00276358	0.0308699	0.999993
74262	chr11	51637750	51637999	TRUE	Stable	2.48162	0.000549351	1.74023	0.035453	0.334238	0.999993
74273	chr11	51855800	51856999	TRUE	Stable	3.91574	8.26492e-07	3.13349	0.000371164	-0.00604475	0.999993
74278	chr11	51999050	52000249	TRUE	Stable	3.03847	3.55111e-05	2.84421	0.000911806	-0.198061	0.999993
74279	chr11	52001150	52001449	TRUE	Stable	2.9309	5.97518e-05	1.90449	0.0215974	-0.304401	0.999993
74280	chr11	52003350	52004049	TRUE	Stable	2.98228	4.67537e-05	2.9007	0.000756786	0.229433	0.999993
74282	chr11	52098100	52098549	TRUE	Stable	2.7002	0.000186762	2.99863	0.000556175	-0.0585819	0.999993
74298	chr11	53300750	53301499	TRUE	Stable	3.31928	9.68674e-06	2.6368	0.00183691	0.0433511	0.999993
74301	chr11	53350150	53350649	TRUE	Stable	3.11813	2.4296e-05	2.47638	0.00322441	0.277576	0.999993
74302	chr11	53350950	53351399	TRUE	Stable	2.49382	0.000517515	2.90074	0.000756692	-0.117681	0.999993
74317	chr11	53567000	53567149	TRUE	Stable	2.00962	0.00481662	2.61133	0.00200734	0.0415107	0.999993
74318	chr11	53567550	53568249	TRUE	Stable	3.31571	9.81953e-06	3.29945	0.000237575	0.164107	0.999993
74324	chr11	53891000	53891749	TRUE	Stable	3.3905	7.08362e-06	2.81786	0.000994802	0.23087	0.999993
74328	chr11	54058550	54058699	TRUE	Stable	1.72596	0.0152751	3.11627	0.0003912	-0.54174	0.999993
74343	chr11	54786250	54787649	TRUE	Stable	3.0562	3.25889e-05	2.97045	0.000606163	0.0977797	0.999993
74344	chr11	54787900	54788199	TRUE	Stable	1.84327	0.00963527	2.09758	0.011684	0.158446	0.999993
74345	chr11	54859650	54860599	TRUE	Stable	3.14208	2.16892e-05	2.58225	0.00222203	0.320725	0.999993
74346	chr11	54860950	54861399	TRUE	Stable	2.94411	5.61891e-05	2.5968	0.00211347	0.186121	0.999993
74347	chr11	54865950	54866199	TRUE	Stable	2.15176	0.00257798	2.89348	0.000775304	-0.0984876	0.999993
74348	chr11	54866550	54866749	TRUE	Stable	2.32669	0.00115141	1.80173	0.0295407	0.510025	0.999993
74349	chr11	54866950	54867949	TRUE	Stable	3.21829	1.51087e-05	2.68562	0.00155527	0.145673	0.999993
74369	chr11	57549200	57549449	TRUE	Stable	2.32589	0.00115542	2.29067	0.0061243	-0.784413	0.999993
74370	chr11	57644000	57646149	TRUE	Stable	2.94316	5.64686e-05	3.32809	0.000221488	0.0270631	0.999993
74374	chr11	57827300	57828599	TRUE	Stable	2.9037	6.85327e-05	2.81073	0.00101881	0.208753	0.999993
74378	chr11	57883150	57883349	TRUE	Stable	2.76216	0.000137665	1.76768	0.0326962	0.145598	0.999993
74395	chr11	58171850	58172499	TRUE	Stable	3.08139	2.88635e-05	2.52474	0.00272044	0.221902	0.999993
74401	chr11	58306450	58308199	TRUE	Stable	2.6796	0.000206988	3.1132	0.000394897	-0.019376	0.999993
74422	chr11	59162850	59163249	TRUE	Stable	2.96434	5.09223e-05	2.94453	0.000656316	-0.141374	0.999993
74423	chr11	59163550	59164199	TRUE	Stable	2.57368	0.000349179	2.34583	0.00507232	0.314871	0.999993
74428	chr11	59207800	59208599	TRUE	Stable	2.13289	0.00280727	3.3943	0.000188588	0.0496151	0.999993
74430	chr11	59226550	59227949	TRUE	Stable	2.7574	0.000140841	3.89722	6.55941e-05	-0.179078	0.999993
74431	chr11	59228500	59228799	TRUE	Stable	2.7001	0.000186799	1.73933	0.0355407	0.102089	0.999993
74434	chr11	59306200	59307699	TRUE	Stable	3.62777	2.63297e-06	2.9379	0.000671182	-0.00879717	0.999993
74437	chr11	59450200	59451049	TRUE	Stable	2.88479	7.52296e-05	3.55483	0.000130957	-0.0554803	0.999993
74448	chr11	59839850	59840599	TRUE	Stable	2.40454	0.000795854	2.85392	0.000881685	0.217651	0.999993
74453	chr11	60105000	60106449	TRUE	Stable	3.32743	9.406e-06	2.78425	0.00111136	0.0840454	0.999993
74454	chr11	60106650	60107399	TRUE	Stable	3.00085	4.25545e-05	2.56244	0.00237911	0.33577	0.999993
74455	chr11	60113650	60114149	TRUE	Stable	2.07469	0.00363065	1.96538	0.0178704	0.127505	0.999993
74456	chr11	60114600	60115249	TRUE	Stable	3.00957	4.0728e-05	3.02569	0.000512325	0.00206061	0.999993
74457	chr11	60115300	60115999	TRUE	Stable	2.45033	0.000638642	2.32954	0.00536116	-0.0556964	0.999993
74458	chr11	60139200	60140999	TRUE	Stable	3.26282	1.23087e-05	3.06202	0.000458228	0.241068	0.999993
74459	chr11	60141050	60141449	TRUE	Stable	2.33548	0.00110503	2.54508	0.00253185	0.253322	0.999993
74460	chr11	60174950	60177649	TRUE	Stable	3.41273	6.45922e-06	3.44981	0.000164629	-0.0117681	0.999993
74463	chr11	60209700	60210499	TRUE	Stable	3.0625	3.16608e-05	2.86417	0.000851563	0.182482	0.999993
74464	chr11	60210600	60211149	TRUE	Stable	3.06381	3.14445e-05	2.24549	0.00713228	-0.0237103	0.999993
74465	chr11	60219700	60220399	TRUE	Stable	3.07487	2.97821e-05	2.97907	0.000590759	-0.224224	0.999993
74471	chr11	60416250	60416999	TRUE	Stable	2.44227	0.0006647	3.9365	5.99725e-05	0.128223	0.999993
74472	chr11	60417400	60418649	TRUE	Stable	3.13283	2.26551e-05	3.16233	0.000341337	0.0914663	0.999993
74475	chr11	60536150	60537499	TRUE	Stable	3.24162	1.35755e-05	3.3472	0.000210977	0.167158	0.999993
74483	chr11	60726300	60727199	TRUE	Stable	4.00331	5.78681e-07	2.33463	0.00526919	0.579333	0.999993
74484	chr11	60727350	60727899	TRUE	Stable	2.7859	0.000122212	3.14043	0.000363884	-0.0652929	0.999993
74485	chr11	60728100	60728349	TRUE	Stable	3.14742	2.11519e-05	1.88962	0.0226069	-0.191225	0.999993
74486	chr11	60775850	60778349	TRUE	Stable	3.15006	2.0897e-05	2.70065	0.00147885	0.174427	0.999993
74495	chr11	60913000	60914499	TRUE	Stable	3.12443	2.35739e-05	3.29968	0.000237425	0.0103988	0.999993
74501	chr11	61173700	61174849	TRUE	Stable	2.90374	6.85245e-05	2.32922	0.00536746	0.285133	0.999993
74510	chr11	61484800	61485149	TRUE	Stable	2.25788	0.00158994	1.87449	0.0237048	0.452578	0.999993
74511	chr11	61485450	61487249	TRUE	Stable	3.39862	6.85502e-06	3.27018	0.000255554	0.140471	0.999993
74512	chr11	61493250	61494199	TRUE	Stable	3.51213	4.21589e-06	3.03813	0.000492071	0.126174	0.999993
74513	chr11	61494850	61495399	TRUE	Stable	2.4198	0.000739838	3.36122	0.000203986	0.0560117	0.999993
74515	chr11	61505150	61505849	TRUE	Stable	2.64654	0.00024377	3.30838	0.000231935	0.104428	0.999993
74520	chr11	61620250	61620849	TRUE	Stable	2.03995	0.00422559	2.82771	0.000962245	-0.422845	0.999993
74525	chr11	61928950	61929949	TRUE	Stable	3.28812	1.09926e-05	2.19465	0.00846532	0.243877	0.999993
74526	chr11	61930300	61931199	TRUE	Stable	2.89387	7.20041e-05	2.61301	0.00199645	0.0369077	0.999993
74534	chr11	62457400	62459299	TRUE	Stable	3.36687	7.93313e-06	3.40728	0.000182846	0.173597	0.999993
74559	chr11	62921400	62921799	TRUE	Stable	2.43122	0.000701533	2.82266	0.000978441	0.326641	0.999993
74575	chr11	64078800	64079399	TRUE	Stable	2.9731	4.88071e-05	2.53518	0.0026215	-0.0436661	0.999993
74576	chr11	64079550	64080249	TRUE	Stable	3.23407	1.40652e-05	3.25878	0.00026336	0.100052	0.999993
74582	chr11	64800650	64800949	TRUE	Stable	2.53421	0.000424466	1.87149	0.0239314	0.0853922	0.999993
74583	chr11	64801200	64801599	TRUE	Stable	2.58342	0.000333014	2.92548	0.000698564	-0.0907586	0.999993
74606	chr11	67965800	67967299	TRUE	Stable	3.15645	2.02697e-05	3.10679	0.000402238	0.0616917	0.999993
74614	chr11	68384250	68387699	TRUE	Stable	3.13763	2.21517e-05	2.943	0.00065976	0.163456	0.999993
74625	chr11	68851650	68852999	TRUE	Stable	3.03034	3.69777e-05	2.66427	0.00167181	0.0488434	0.999993
74626	chr11	68853350	68853899	TRUE	Stable	2.91756	6.39946e-05	2.93089	0.000686169	0.259585	0.999993
74664	chr11	69121050	69124249	TRUE	Stable	3.74197	1.65374e-06	3.42351	0.000175016	0.135352	0.999993
74679	chr11	69365750	69366649	TRUE	Stable	2.61401	0.000286188	2.8015	0.00104985	-0.0570252	0.999993
74680	chr11	69366700	69368799	TRUE	Stable	3.54853	3.63677e-06	3.34512	0.000212061	0.227448	0.999993
74681	chr11	69368950	69369199	TRUE	Stable	2.26941	0.00150649	1.8987	0.0219871	0.695058	0.999993
74682	chr11	69369650	69369899	TRUE	Stable	2.56757	0.000360173	1.92443	0.020311	0.187989	0.999993
74687	chr11	69408750	69412249	TRUE	Stable	3.59724	2.96149e-06	3.11287	0.000395084	0.165848	0.999993
74691	chr11	69414050	69415999	TRUE	Stable	2.85482	8.72778e-05	2.68079	0.00158163	0.336408	0.999993
74692	chr11	69416450	69417599	TRUE	Stable	3.30235	1.03657e-05	3.50329	0.000146384	-0.0530933	0.999993
74693	chr11	69417700	69418999	TRUE	Stable	3.26722	1.20594e-05	3.45912	0.000162129	0.0808389	0.999993
74694	chr11	69419200	69420849	TRUE	Stable	3.47297	4.9799e-06	3.17117	0.000333633	0.0341137	0.999993
74696	chr11	69546200	69547549	TRUE	Stable	2.83693	9.51311e-05	3.11075	0.000397472	0.280495	0.999993
74697	chr11	69558750	69561199	TRUE	Stable	3.49099	4.61109e-06	3.21033	0.000300122	-0.00533349	0.999993
74699	chr11	69579700	69580299	TRUE	Stable	2.81916	0.000103901	3.36584	0.000201798	-0.136823	0.999993
74700	chr11	69580550	69581299	TRUE	Stable	3.06852	3.07223e-05	2.9936	0.000565065	-0.209822	0.999993
74701	chr11	69581700	69582599	TRUE	Stable	3.15124	2.07782e-05	2.50087	0.00296049	-0.180365	0.999993
74707	chr11	69633200	69634299	TRUE	Stable	2.7975	0.000115457	3.14132	0.000363186	0.143121	0.999993
74710	chr11	69662500	69663249	TRUE	Stable	2.48841	0.000531646	2.1557	0.00962393	0.156781	0.999993
74711	chr11	69670350	69671299	TRUE	Stable	2.95133	5.41387e-05	3.09152	0.000419904	0.164935	0.999993
74712	chr11	69680950	69681699	TRUE	Stable	3.24553	1.33332e-05	3.03973	0.000489743	0.310464	0.999993
74713	chr11	69681900	69682449	TRUE	Stable	3.07222	3.01747e-05	2.54904	0.00249631	-0.126753	0.999993
74716	chr11	69757150	69758249	TRUE	Stable	2.96574	5.06028e-05	3.39942	0.000186181	0.0231117	0.999993
74721	chr11	69800000	69801449	TRUE	Stable	3.00231	4.22367e-05	2.95551	0.00063482	0.236256	0.999993
74728	chr11	69836700	69838199	TRUE	Stable	3.65118	2.40286e-06	2.97242	0.000602089	0.10347	0.999993
74729	chr11	69838550	69839099	TRUE	Stable	2.82945	9.87016e-05	3.16353	0.000340401	0.0308313	0.999993
74731	chr11	69845500	69846599	TRUE	Stable	2.66592	0.000221566	2.93216	0.000683327	0.368421	0.999993
74732	chr11	69846700	69847349	TRUE	Stable	2.91472	6.48832e-05	3.36164	0.000203986	0.292741	0.999993
74737	chr11	69901100	69901599	TRUE	Stable	3.2422	1.35402e-05	2.84626	0.000905116	-0.0736972	0.999993
74738	chr11	69901900	69903049	TRUE	Stable	2.93291	5.92298e-05	2.81063	0.0010189	0.204992	0.999993
74741	chr11	69919550	69920799	TRUE	Stable	3.34634	8.67834e-06	2.8897	0.000784335	0.0784802	0.999993
74742	chr11	69921900	69922649	TRUE	Stable	2.97412	4.85601e-05	3.32546	0.000222903	0.246243	0.999993
74744	chr11	69934950	69936799	TRUE	Stable	3.8504	1.05785e-06	2.48857	0.00308934	0.213642	0.999993
74748	chr11	69979300	69980549	TRUE	Stable	3.30321	1.03254e-05	3.10034	0.000410206	0.126128	0.999993
74750	chr11	69990750	69990849	TRUE	Stable	2.5365	0.000419709	1.64895	0.0460686	0.357547	0.999993
74751	chr11	69991050	69992599	TRUE	Stable	2.73549	0.000157027	4.06791	4.18294e-05	-0.124358	0.999993
74752	chr11	69995100	69995249	TRUE	Stable	1.6918	0.017386	1.88321	0.0230592	-0.327672	0.999993
74755	chr11	70000800	70001899	TRUE	Stable	3.19569	1.68036e-05	2.78889	0.0010949	-0.186809	0.999993
74758	chr11	70020200	70020699	TRUE	Stable	1.95378	0.00610768	2.81706	0.000997154	-0.231298	0.999993
74759	chr11	70020950	70021549	TRUE	Stable	2.70781	0.000179806	2.68661	0.00155047	0.169051	0.999993
74769	chr11	70219750	70222099	TRUE	Stable	3.07079	3.03819e-05	3.08656	0.000426376	-0.0666054	0.999993
74777	chr11	70238000	70239849	TRUE	Stable	3.4981	4.47129e-06	3.5937	0.000120661	0.0567908	0.999993
74778	chr11	70239900	70240599	TRUE	Stable	2.99484	4.38609e-05	3.35078	0.000209249	0.129198	0.999993
74782	chr11	70408800	70409949	TRUE	Stable	3.77775	1.41166e-06	3.08777	0.000425145	-0.0399299	0.999993
74784	chr11	70432650	70433549	TRUE	Stable	2.9809	4.70352e-05	2.93977	0.000667174	0.18264	0.999993
74785	chr11	70451750	70451899	TRUE	Stable	1.99257	0.00518489	3.22261	0.000289102	-0.176844	0.999993
74786	chr11	70452300	70452849	TRUE	Stable	2.13972	0.00272062	3.74107	8.97396e-05	-0.121322	0.999993
74792	chr11	70562100	70564399	TRUE	Stable	3.26206	1.23499e-05	3.14814	0.000355853	0.175275	0.999993
74796	chr11	70652250	70657449	TRUE	Stable	3.21391	1.54065e-05	3.26456	0.000259267	0.0378684	0.999993
74799	chr11	70669450	70670599	TRUE	Stable	2.80034	0.000113837	2.66074	0.00169173	0.0673418	0.999993
74800	chr11	70687050	70689049	TRUE	Stable	2.91922	6.3464e-05	2.83853	0.000929456	0.0906603	0.999993
74812	chr11	71018300	71019149	TRUE	Stable	2.9694	4.96656e-05	3.0938	0.000417703	0.0202726	0.999993
74813	chr11	71019750	71020799	TRUE	Stable	2.88492	7.51896e-05	2.89749	0.000765388	0.155333	0.999993
74819	chr11	72041750	72042399	TRUE	Stable	2.73291	0.000159041	2.74954	0.00124894	0.0948475	0.999993
74820	chr11	72042450	72043799	TRUE	Stable	3.40429	6.68893e-06	3.08744	0.000425577	0.458363	0.999993
74823	chr11	72206100	72207049	TRUE	Stable	3.16685	1.92532e-05	3.10602	0.000402991	-0.0589107	0.999993
74824	chr11	72207300	72208399	TRUE	Stable	3.81098	1.23749e-06	2.69957	0.0014842	0.218269	0.999993
74828	chr11	72361450	72362449	TRUE	Stable	3.11883	2.4228e-05	2.66988	0.00164131	-0.0355811	0.999993
74835	chr11	72606700	72606999	TRUE	Stable	2.24091	0.0017184	2.4906	0.00306858	0.167871	0.999993
74836	chr11	72607300	72607649	TRUE	Stable	2.37428	0.00092046	2.17645	0.00899028	0.509417	0.999993
74837	chr11	72607800	72608199	TRUE	Stable	2.78986	0.000119849	2.44557	0.00358973	-0.221005	0.999993
74838	chr11	72608600	72609249	TRUE	Stable	2.86343	8.37051e-05	2.42302	0.00387901	0.147242	0.999993
74842	chr11	72795650	72795999	TRUE	Stable	2.53961	0.000413326	2.24722	0.00708979	0.341971	0.999993
74843	chr11	72796350	72797349	TRUE	Stable	3.37187	7.74233e-06	3.01964	0.000520979	0.119017	0.999993
74852	chr11	73175400	73176749	TRUE	Stable	2.83265	9.7157e-05	2.89388	0.000774161	0.0316685	0.999993
74853	chr11	73177300	73178149	TRUE	Stable	3.09525	2.70226e-05	3.0753	0.000441425	0.10428	0.999993
74862	chr11	74648750	74649299	TRUE	Stable	2.38852	0.000859518	2.74627	0.00126349	0.252464	0.999993
74863	chr11	74649500	74650549	TRUE	Stable	2.74629	0.000148665	3.04936	0.000476186	0.0141282	0.999993
74864	chr11	74722500	74723449	TRUE	Stable	3.60399	2.88212e-06	3.32739	0.000221798	0.347986	0.999993
74865	chr11	74724650	74724899	TRUE	Stable	3.03512	3.61208e-05	2.19264	0.00851897	0.126337	0.999993
74869	chr11	74829500	74830799	TRUE	Stable	2.97295	4.88335e-05	2.89745	0.00076543	-0.0649628	0.999993
74870	chr11	74830950	74832149	TRUE	Stable	3.81179	1.23252e-06	2.86516	0.000848238	0.283373	0.999993
74872	chr11	74837500	74838399	TRUE	Stable	3.32877	9.35835e-06	3.15036	0.000353041	0.305613	0.999993
74873	chr11	74838500	74839149	TRUE	Stable	2.9399	5.73748e-05	2.36261	0.00478625	-0.0726368	0.999993
74877	chr11	74924950	74925749	TRUE	Stable	3.48201	4.78858e-06	2.1722	0.00912017	0.556905	0.999993
74878	chr11	74926400	74927149	TRUE	Stable	2.50689	0.000485352	3.17057	0.000334133	0.403871	0.999993
74896	chr11	75460250	75461249	TRUE	Stable	3.19108	1.71355e-05	3.60595	0.00011715	-0.270188	0.999993
74903	chr11	75530500	75532999	TRUE	Stable	3.78282	1.38533e-06	3.03818	0.00049206	0.140683	0.999993
74906	chr11	75630150	75630799	TRUE	Stable	2.66884	0.000218365	2.93397	0.000679522	0.378127	0.999993
74907	chr11	75631000	75631799	TRUE	Stable	3.02986	3.7044e-05	3.24987	0.000269225	-0.061844	0.999993
74911	chr11	75678550	75679099	TRUE	Stable	2.957	5.26978e-05	2.15048	0.00979395	1.05021	0.999993
74912	chr11	75679700	75680699	TRUE	Stable	2.98882	4.52288e-05	3.11305	0.000394956	0.0185428	0.999993
74913	chr11	75732250	75732699	TRUE	Stable	2.64357	0.000247467	2.85875	0.000866714	-0.210104	0.999993
74930	chr11	76309900	76310099	TRUE	Stable	1.47493	0.0379376	2.42412	0.00386399	0.455922	0.999993
74932	chr11	76343400	76343599	TRUE	Stable	1.88489	0.00813217	2.78483	0.00110929	0.728131	0.999993
74935	chr11	76407050	76407899	TRUE	Stable	2.92668	6.11045e-05	2.73566	0.00130906	-0.122687	0.999993
74940	chr11	76494000	76495049	TRUE	Stable	3.08804	2.7939e-05	3.27438	0.000252345	0.117498	0.999993
74941	chr11	76495100	76495549	TRUE	Stable	2.51096	0.000476095	2.1042	0.0114351	0.341254	0.999993
74942	chr11	76570300	76571899	TRUE	Stable	3.55812	3.49102e-06	3.16928	0.00033549	0.089437	0.999993
74946	chr11	76647050	76647699	TRUE	Stable	2.57733	0.000342704	2.25191	0.0069819	-0.0277275	0.999993
74953	chr11	76945100	76945799	TRUE	Stable	3.15914	1.99784e-05	2.05914	0.0132361	0.57177	0.999993
74954	chr11	76946050	76946649	TRUE	Stable	3.17958	1.8139e-05	3.6408	0.000110222	-0.0484594	0.999993
74959	chr11	77215300	77216449	TRUE	Stable	2.99086	4.47551e-05	3.58614	0.000122501	0.222459	0.999993
74960	chr11	77216500	77217449	TRUE	Stable	3.3605	8.16829e-06	2.90444	0.000748041	-0.082828	0.999993
74966	chr11	77491350	77493149	TRUE	Stable	3.43863	5.75416e-06	3.42685	0.000173473	0.132739	0.999993
74967	chr11	77493450	77494649	TRUE	Stable	3.01731	3.92565e-05	3.10645	0.00040264	0.0194102	0.999993
74980	chr11	77686700	77686949	TRUE	Stable	4.48211	7.6399e-08	1.72006	0.0376339	0.00624315	0.999993
74987	chr11	77914650	77915549	TRUE	Stable	2.47662	0.000562698	2.65913	0.00170158	0.0550231	0.999993
74990	chr11	77930950	77931649	TRUE	Stable	3.00968	4.07115e-05	3.62097	0.000113882	-0.0981786	0.999993
74991	chr11	77981900	77982349	TRUE	Stable	3.01609	3.94636e-05	2.64852	0.00176361	0.201317	0.999993
74992	chr11	77983200	77984849	TRUE	Stable	3.19417	1.68879e-05	2.81455	0.0010064	0.0504687	0.999993
74993	chr11	77984950	77985749	TRUE	Stable	3.04284	3.47364e-05	2.96533	0.000615744	0.110281	0.999993
74994	chr11	78031800	78033199	TRUE	Stable	2.7237	0.00016594	2.9866	0.000577918	0.164896	0.999993
75000	chr11	78114800	78115249	TRUE	Stable	2.14251	0.00268653	2.62574	0.00190876	-0.268801	0.999993
75001	chr11	78115650	78116399	TRUE	Stable	3.74392	1.64049e-06	3.05398	0.00046934	0.106525	0.999993
75002	chr11	78163050	78165249	TRUE	Stable	2.63448	0.000258504	2.80204	0.00104787	0.157091	0.999993
75005	chr11	78176650	78179499	TRUE	Stable	3.38659	7.21722e-06	3.1576	0.000345504	0.0449834	0.999993
75009	chr11	78187850	78188649	TRUE	Stable	2.69695	0.000189752	2.63736	0.00183337	0.00669772	0.999993
75010	chr11	78188800	78189999	TRUE	Stable	3.01152	4.0388e-05	2.71944	0.00138525	0.111745	0.999993
75014	chr11	78245550	78245699	TRUE	Stable	1.44378	0.0421511	2.46809	0.00332027	0.257281	0.999993
75015	chr11	78246350	78246699	TRUE	Stable	2.06466	0.00379462	2.78406	0.00111204	0.202413	0.999993
75017	chr11	78261800	78262549	TRUE	Stable	3.80113	1.29846e-06	3.09903	0.000411499	-0.00483575	0.999993
75029	chr11	78535100	78536049	TRUE	Stable	3.22658	1.45219e-05	3.05163	0.000472634	0.0645162	0.999993
75030	chr11	78536600	78537399	TRUE	Stable	3.55765	3.49744e-06	3.29179	0.00024208	-5.87636e-05	0.999993
75043	chr11	79338950	79339399	TRUE	Stable	2.91255	6.55897e-05	2.98408	0.000581278	0.0208362	0.999993
75048	chr11	79703400	79704199	TRUE	Stable	3.28884	1.09499e-05	2.73581	0.00130858	0.558451	0.999993
75049	chr11	79704900	79705199	TRUE	Stable	2.33883	0.00108766	2.21492	0.00791154	0.435493	0.999993
75055	chr11	79992400	79992849	TRUE	Stable	2.28239	0.00141823	3.35364	0.000208078	-0.249993	0.999993
75065	chr11	80209450	80210149	TRUE	Stable	2.24321	0.00170081	2.8356	0.000938281	0.291013	0.999993
75088	chr11	81449450	81449899	TRUE	Stable	3.11402	2.48e-05	2.25527	0.00690103	0.328739	0.999993
75130	chr11	84179000	84179499	TRUE	Stable	2.97456	4.84686e-05	2.62418	0.00191978	0.0572154	0.999993
75131	chr11	84179800	84181299	TRUE	Stable	3.01459	3.97838e-05	3.42713	0.000173419	-0.0289549	0.999993
75137	chr11	84524850	84526299	TRUE	Stable	3.79443	1.33116e-06	2.98395	0.000581418	0.238282	0.999993
75147	chr11	84870850	84871799	TRUE	Stable	3.58803	3.07164e-06	3.18808	0.000318092	0.227869	0.999993
75150	chr11	84915450	84916199	TRUE	Stable	2.37975	0.00089607	2.62914	0.00188607	0.101221	0.999993
75151	chr11	84916550	84916749	TRUE	Stable	2.42457	0.000723247	2.15926	0.00951049	0.438031	0.999993
75155	chr11	85140450	85141099	TRUE	Stable	3.17648	1.84198e-05	2.46979	0.00330237	0.0675609	0.999993
75169	chr11	85713750	85714249	TRUE	Stable	1.82888	0.0102088	2.81082	0.0010185	-0.0429262	0.999993
75171	chr11	85829500	85830499	TRUE	Stable	2.75712	0.000141057	2.75576	0.00122306	-0.242595	0.999993
75173	chr11	85831750	85833949	TRUE	Stable	3.44309	5.64557e-06	3.18627	0.000319891	-0.0267148	0.999993
75177	chr11	85843000	85843149	TRUE	Stable	2.4194	0.000741162	2.29999	0.00593733	0.292131	0.999993
75178	chr11	85843400	85844899	TRUE	Stable	3.13595	2.23247e-05	3.10088	0.000409346	0.0147831	0.999993
75184	chr11	85917250	85917649	TRUE	Stable	2.16127	0.00247037	1.84994	0.0255589	-0.170252	0.999993
75192	chr11	86200150	86200949	TRUE	Stable	3.04662	3.40889e-05	3.16564	0.000338259	0.192574	0.999993
75193	chr11	86201350	86202549	TRUE	Stable	3.41035	6.51575e-06	2.87271	0.000826599	-0.0334519	0.999993
75202	chr11	86543450	86544499	TRUE	Stable	3.64835	2.43759e-06	3.57839	0.00012413	0.0140767	0.999993
75203	chr11	86545000	86545699	TRUE	Stable	2.36915	0.000943147	2.9335	0.000680703	-0.0792155	0.999993
75208	chr11	86756000	86757349	TRUE	Stable	3.80648	1.26264e-06	3.34935	0.000209863	0.102734	0.999993
75209	chr11	86757900	86758799	TRUE	Stable	3.42208	6.20015e-06	3.12346	0.000382031	0.195974	0.999993
75227	chr11	87426100	87426499	TRUE	Stable	2.87249	8.00008e-05	3.04522	0.000481587	0.151612	0.999993
75228	chr11	87442650	87443149	TRUE	Stable	2.17175	0.00235834	2.95902	0.000628461	-0.379354	0.999993
75252	chr11	87986050	87987499	TRUE	Stable	2.87594	7.86661e-05	2.99181	0.00056855	0.180057	0.999993
75253	chr11	87987700	87988049	TRUE	Stable	3.50799	4.26931e-06	2.32011	0.00553787	0.657875	0.999993
75254	chr11	88046800	88047449	TRUE	Stable	2.50295	0.000494811	3.31056	0.000230321	-0.249168	0.999993
75255	chr11	88048500	88049699	TRUE	Stable	3.03976	3.52937e-05	2.29573	0.00602217	0.0654037	0.999993
75258	chr11	88067300	88067999	TRUE	Stable	3.91139	8.38101e-07	3.88972	6.58868e-05	0.218295	0.999993
75259	chr11	88068550	88068899	TRUE	Stable	2.3377	0.00109334	2.54456	0.00253632	-0.343128	0.999993
75265	chr11	88161050	88162249	TRUE	Stable	3.27897	1.1429e-05	2.68422	0.0015627	0.122404	0.999993
75267	chr11	88180850	88181299	TRUE	Stable	2.45002	0.000639568	3.04675	0.000479757	-0.0844389	0.999993
75280	chr11	88555650	88555799	TRUE	Stable	2.04299	0.00417221	3.06984	0.000447961	-0.178282	0.999993
75281	chr11	88556250	88556449	TRUE	Stable	1.46715	0.0389466	2.06116	0.0131513	0.233608	0.999993
75288	chr11	88715850	88717849	TRUE	Stable	3.29613	1.06337e-05	4.15073	3.45057e-05	-0.037129	0.999993
75289	chr11	88718450	88719399	TRUE	Stable	3.50907	4.25366e-06	3.50384	0.000146384	0.278019	0.999993
75290	chr11	88863000	88864599	TRUE	Stable	3.85863	1.02775e-06	3.50131	0.00014699	0.210163	0.999993
75291	chr11	88864800	88865349	TRUE	Stable	3.33879	8.95785e-06	3.04419	0.000483043	0.469249	0.999993
75317	chr11	90249550	90250749	TRUE	Stable	3.42744	6.04689e-06	2.94371	0.00065816	0.257856	0.999993
75318	chr11	90389600	90391099	TRUE	Stable	3.28443	1.11642e-05	3.47499	0.000156503	0.154014	0.999993
75319	chr11	90417550	90417799	TRUE	Stable	2.57309	0.000350262	1.68353	0.0417803	0.0699228	0.999993
75332	chr11	93886500	93887549	TRUE	Stable	3.92683	7.84739e-07	3.02322	0.000516364	-0.000959416	0.999993
75343	chr11	94209550	94211049	TRUE	Stable	3.78082	1.39382e-06	4.09944	3.84374e-05	0.0259545	0.999993
75346	chr11	94242550	94243549	TRUE	Stable	2.81603	0.000105485	3.12022	0.000385958	-0.271426	0.999993
75354	chr11	94327500	94327799	TRUE	Stable	2.19609	0.00211328	2.35106	0.00498296	-0.0348049	0.999993
75355	chr11	94327900	94328599	TRUE	Stable	2.90568	6.78439e-05	2.40853	0.00407541	0.212412	0.999993
75356	chr11	94328700	94329099	TRUE	Stable	4.00696	5.71553e-07	2.79881	0.00105982	-0.184004	0.999993
75359	chr11	94471150	94474099	TRUE	Stable	3.24567	1.33284e-05	3.3175	0.000227559	0.244678	0.999993
75360	chr11	94474350	94474849	TRUE	Stable	2.33439	0.0011108	1.83284	0.0269013	0.0929652	0.999993
75368	chr11	94601300	94602199	TRUE	Stable	3.72776	1.73958e-06	2.46206	0.00339013	0.0986014	0.999993
75374	chr11	94881450	94882049	TRUE	Stable	2.68549	0.000200852	2.20693	0.00812576	0.391128	0.999993
75375	chr11	94882150	94882399	TRUE	Stable	1.83536	0.00994384	2.55451	0.00244846	0.108473	0.999993
75381	chr11	94989050	94989899	TRUE	Stable	2.29157	0.00135843	3.02875	0.000507232	0.0374584	0.999993
75382	chr11	94990500	94990849	TRUE	Stable	3.14895	2.1001e-05	1.94016	0.0193501	0.643502	0.999993
75383	chr11	94991100	94994199	TRUE	Stable	3.5398	3.76511e-06	3.45624	0.000163189	0.144864	0.999993
75386	chr11	95009100	95010049	TRUE	Stable	3.68241	2.11903e-06	2.83301	0.000944855	0.0630113	0.999993
75387	chr11	95010150	95011449	TRUE	Stable	3.05808	3.23116e-05	3.11029	0.000397955	0.153533	0.999993
75393	chr11	95145100	95146399	TRUE	Stable	3.03633	3.59085e-05	2.6497	0.00175693	0.240463	0.999993
75399	chr11	95258850	95259649	TRUE	Stable	3.50343	4.36663e-06	3.1736	0.000331562	0.216018	0.999993
75404	chr11	95384950	95385899	TRUE	Stable	3.02661	3.75973e-05	3.10129	0.000409259	0.0700023	0.999993
75405	chr11	95414050	95415749	TRUE	Stable	3.2555	1.27272e-05	2.90663	0.000743093	0.247733	0.999993
75419	chr11	95712200	95712549	TRUE	Stable	3.18456	1.7701e-05	2.01544	0.0152326	0.362641	0.999993
75420	chr11	95713250	95714399	TRUE	Stable	3.49132	4.60563e-06	3.10011	0.000410308	0.0411608	0.999993
75423	chr11	95823850	95825299	TRUE	Stable	3.5603	3.45786e-06	3.12237	0.000383109	0.135364	0.999993
75428	chr11	95990050	95991149	TRUE	Stable	3.3334	9.16431e-06	2.5758	0.00227314	0.504432	0.999993
75432	chr11	96005700	96005849	TRUE	Stable	2.90812	6.70314e-05	1.94843	0.0188523	0.296378	0.999993
75433	chr11	96006350	96008499	TRUE	Stable	3.47792	4.87659e-06	3.04148	0.000486923	0.142884	0.999993
75442	chr11	96194150	96194299	TRUE	Stable	1.75126	0.0138655	1.87556	0.023624	-0.689595	0.999993
75449	chr11	96282100	96283399	TRUE	Stable	3.52122	4.06628e-06	3.21923	0.000292174	0.0172523	0.999993
75451	chr11	96284100	96285199	TRUE	Stable	3.99859	5.92864e-07	3.19295	0.00031353	0.315086	0.999993
75452	chr11	96285500	96287449	TRUE	Stable	3.778	1.41166e-06	4.06017	4.3138e-05	0.0501117	0.999993
75465	chr11	96310500	96313249	TRUE	Stable	2.75222	0.000144332	2.827	0.000964589	-0.0556504	0.999993
75470	chr11	96318100	96320849	TRUE	Stable	3.17733	1.83525e-05	3.06336	0.000456095	0.0336492	0.999993
75472	chr11	96326250	96326599	TRUE	Stable	2.38045	0.000893211	2.91789	0.000715501	-0.683589	0.999993
75474	chr11	96332300	96332599	TRUE	Stable	1.8128	0.0108862	2.91927	0.000712267	0.175126	0.999993
75475	chr11	96332650	96334349	TRUE	Stable	3.22018	1.49602e-05	2.83637	0.000935825	-0.00392413	0.999993
75477	chr11	96340350	96340949	TRUE	Stable	2.87038	8.08798e-05	2.82686	0.0009651	0.197663	0.999993
75479	chr11	96341450	96342249	TRUE	Stable	2.89526	7.14995e-05	2.98166	0.000585289	-0.126595	0.999993
75487	chr11	96351650	96355249	TRUE	Stable	3.26614	1.21226e-05	3.19456	0.000312302	0.185422	0.999993
75498	chr11	96823350	96824149	TRUE	Stable	2.82687	0.000100003	3.55988	0.000129539	0.238768	0.999993
75499	chr11	96824350	96824799	TRUE	Stable	2.12375	0.00292232	2.31779	0.00558431	0.307814	0.999993
75500	chr11	96828750	96829599	TRUE	Stable	3.426	6.08323e-06	3.16618	0.000338226	0.178764	0.999993
75501	chr11	96830450	96831099	TRUE	Stable	2.99885	4.29974e-05	2.74962	0.00124884	0.0761774	0.999993
75503	chr11	96849850	96850549	TRUE	Stable	3.55159	3.58292e-06	3.44872	0.000165097	0.2671	0.999993
75507	chr11	96875850	96876199	TRUE	Stable	3.7726	1.43922e-06	3.19072	0.000315215	0.445609	0.999993
75508	chr11	96876300	96876699	TRUE	Stable	1.83352	0.0100173	2.84776	0.000900867	0.504651	0.999993
75522	chr11	97040800	97041449	TRUE	Stable	3.44896	5.5108e-06	3.53304	0.000137284	0.205149	0.999993
75523	chr11	97041650	97042499	TRUE	Stable	2.9145	6.49536e-05	3.91074	6.33043e-05	0.0241022	0.999993
75530	chr11	97150050	97151199	TRUE	Stable	3.21413	1.53953e-05	3.04122	0.000487201	0.420252	0.999993
75531	chr11	97151550	97152199	TRUE	Stable	2.70814	0.00017958	2.45373	0.00348966	-0.00251754	0.999993
75534	chr11	97186100	97186999	TRUE	Stable	3.2625	1.23183e-05	2.93777	0.00067148	0.0635797	0.999993
75535	chr11	97188450	97189399	TRUE	Stable	2.87703	7.82183e-05	2.93764	0.000671807	0.320196	0.999993
75536	chr11	97278900	97280249	TRUE	Stable	2.63012	0.000264235	3.3165	0.000228026	0.0940974	0.999993
75559	chr11	97659550	97660399	TRUE	Stable	3.17091	1.88959e-05	3.63405	0.000111276	0.0499657	0.999993
75560	chr11	97660450	97662249	TRUE	Stable	2.89723	7.08214e-05	3.00568	0.000544794	0.000107074	0.999993
75562	chr11	97663750	97664599	TRUE	Stable	2.15106	0.00258618	3.46476	0.000160672	-0.415229	0.999993
75569	chr11	97702550	97703149	TRUE	Stable	2.94952	5.46068e-05	2.51376	0.00282695	0.333118	0.999993
75570	chr11	97703650	97704449	TRUE	Stable	2.84727	9.05561e-05	3.02134	0.000519095	0.230608	0.999993
75581	chr11	97799650	97800149	TRUE	Stable	2.20546	0.00202524	3.2571	0.00026399	0.541565	0.999993
75582	chr11	97800400	97801599	TRUE	Stable	2.65179	0.000237579	3.15049	0.000353029	0.133707	0.999993
75585	chr11	97840850	97842049	TRUE	Stable	2.38898	0.000857599	3.03765	0.000492909	-0.123784	0.999993
75605	chr11	98148500	98149449	TRUE	Stable	4.02618	5.34577e-07	2.82112	0.000983758	0.240187	0.999993
75607	chr11	98149900	98150449	TRUE	Stable	3.22995	1.43063e-05	3.53424	0.000136926	0.105573	0.999993
75613	chr11	98294150	98295249	TRUE	Stable	3.78281	1.38533e-06	3.00717	0.000542341	-0.0107441	0.999993
75617	chr11	98357650	98358299	TRUE	Stable	2.33941	0.00108484	3.59217	0.000121255	-0.144697	0.999993
75618	chr11	98358500	98359349	TRUE	Stable	2.95388	5.35229e-05	2.80619	0.00103346	-0.0292826	0.999993
75623	chr11	98457050	98458399	TRUE	Stable	3.11556	2.46077e-05	3.10024	0.000410276	0.472108	0.999993
75630	chr11	98586100	98586949	TRUE	Stable	4.07379	4.5348e-07	4.02212	4.76271e-05	0.0567424	0.999993
75631	chr11	98587300	98588749	TRUE	Stable	2.86391	8.35347e-05	3.53886	0.000135828	0.0100156	0.999993
75647	chr11	98794000	98795199	TRUE	Stable	3.40096	6.78235e-06	3.13772	0.000367105	0.0192898	0.999993
75648	chr11	98795850	98796649	TRUE	Stable	3.06116	3.18832e-05	3.02967	0.000505906	-0.143846	0.999993
75649	chr11	98796800	98797699	TRUE	Stable	3.11748	2.43738e-05	2.92561	0.000698321	0.0721267	0.999993
75651	chr11	98809200	98809449	TRUE	Stable	2.23107	0.00179792	2.27071	0.00654895	-0.369902	0.999993
75652	chr11	98810050	98810949	TRUE	Stable	3.09767	2.67249e-05	2.63539	0.00184605	-0.022248	0.999993
75655	chr11	98863000	98863449	TRUE	Stable	2.34121	0.00107563	1.89276	0.0223869	0.195288	0.999993
75656	chr11	98864000	98864599	TRUE	Stable	3.16923	1.90397e-05	3.16874	0.000335847	0.0696804	0.999993
75658	chr11	98907800	98908949	TRUE	Stable	3.34503	8.72583e-06	2.9854	0.000579362	0.180207	0.999993
75659	chr11	98925300	98925699	TRUE	Stable	3.02283	3.82732e-05	2.1717	0.00913406	0.698324	0.999993
75660	chr11	98925800	98925999	TRUE	Stable	2.85415	8.75266e-05	3.02022	0.000519742	-0.254506	0.999993
75665	chr11	98936350	98939199	TRUE	Stable	3.3006	1.04233e-05	3.39686	0.000187347	-0.00899123	0.999993
75667	chr11	98941300	98941999	TRUE	Stable	2.68064	0.000205879	3.32038	0.000225483	0.179502	0.999993
75669	chr11	98959450	98962149	TRUE	Stable	3.43457	5.85782e-06	3.2168	0.000294581	0.0115471	0.999993
75670	chr11	98962800	98963399	TRUE	Stable	2.55208	0.00038885	2.91965	0.000711601	-0.127722	0.999993
75671	chr11	98963450	98963999	TRUE	Stable	2.99592	4.36387e-05	3.07769	0.000437871	0.124366	0.999993
75675	chr11	98969550	98969699	TRUE	Stable	2.11945	0.00297906	2.09958	0.0116132	0.4747	0.999993
75678	chr11	99040100	99043199	TRUE	Stable	3.19754	1.66494e-05	3.05532	0.000467705	0.0968774	0.999993
75685	chr11	99132050	99132449	TRUE	Stable	2.34972	0.0010323	2.33213	0.00531256	0.0867743	0.999993
75688	chr11	99228700	99230099	TRUE	Stable	3.31912	9.69219e-06	3.05991	0.00046082	-0.0544898	0.999993
75689	chr11	99230850	99231649	TRUE	Stable	3.06733	3.08989e-05	2.77609	0.00114081	0.362626	0.999993
75695	chr11	100319250	100319699	TRUE	Stable	3.52107	4.06969e-06	2.54315	0.00254892	-0.0107877	0.999993
75701	chr11	100413600	100416249	TRUE	Stable	3.5189	4.10922e-06	2.81254	0.0010124	0.324221	0.999993
75714	chr11	100618300	100619249	TRUE	Stable	2.81445	0.000106252	2.63229	0.00186606	-0.17099	0.999993
75715	chr11	100619850	100620599	TRUE	Stable	2.54616	0.000400248	2.91683	0.000718307	-0.135781	0.999993
75739	chr11	101081800	101082499	TRUE	Stable	3.14338	2.15568e-05	2.99436	0.000564126	0.0835108	0.999993
75740	chr11	101082750	101083649	TRUE	Stable	3.36172	8.11873e-06	2.74959	0.00124892	0.077994	0.999993
75741	chr11	101086750	101088149	TRUE	Stable	3.14963	2.09357e-05	2.55876	0.00241219	0.0385828	0.999993
75743	chr11	101118500	101119799	TRUE	Stable	2.81266	0.000107265	2.54897	0.00249673	0.259838	0.999993
75744	chr11	101120150	101121399	TRUE	Stable	3.45652	5.33443e-06	2.92135	0.000707734	0.0616638	0.999993
75749	chr11	101170250	101171399	TRUE	Stable	3.67107	2.22977e-06	3.16557	0.000338303	-0.0286394	0.999993
75750	chr11	101171600	101172749	TRUE	Stable	3.0839	2.85236e-05	3.33967	0.000215555	0.123196	0.999993
75753	chr11	101225550	101226999	TRUE	Stable	3.15517	2.04043e-05	3.54642	0.000133527	-0.0145582	0.999993
75755	chr11	101245550	101246749	TRUE	Stable	3.36956	7.82661e-06	2.7725	0.00115563	0.175802	0.999993
75756	chr11	101246800	101247099	TRUE	Stable	1.94579	0.00631693	2.82017	0.000986216	-0.172659	0.999993
75759	chr11	101259750	101261499	TRUE	Stable	3.68956	2.04673e-06	2.7518	0.00124019	0.254699	0.999993
75764	chr11	101315400	101317399	TRUE	Stable	2.98473	4.61911e-05	3.03511	0.000497484	0.107195	0.999993
75766	chr11	101416450	101417349	TRUE	Stable	3.35454	8.38686e-06	2.98826	0.00057474	0.116511	0.999993
75767	chr11	101417400	101417899	TRUE	Stable	2.6552	0.000233383	2.65852	0.0017049	0.116845	0.999993
75782	chr11	101628000	101628899	TRUE	Stable	3.37838	7.4903e-06	3.23904	0.000276989	-0.113816	0.999993
75783	chr11	101640850	101641699	TRUE	Stable	3.14309	2.15844e-05	2.64446	0.0017882	0.163882	0.999993
75789	chr11	101772200	101772349	TRUE	Stable	2.4144	0.000759175	1.78899	0.030675	-0.484463	0.999993
75792	chr11	101784550	101785349	TRUE	Stable	3.53826	3.78453e-06	3.20167	0.000307239	0.162678	0.999993
75793	chr11	101785450	101785999	TRUE	Stable	2.86883	8.14813e-05	2.76018	0.0012035	-0.0634317	0.999993
75806	chr11	102026100	102026949	TRUE	Stable	2.59506	0.000315041	3.26162	0.000261676	0.336203	0.999993
75807	chr11	102027050	102027149	TRUE	Stable	1.71184	0.0161132	1.70514	0.0392918	-0.656615	0.999993
75808	chr11	102027350	102027749	TRUE	Stable	3.15318	2.06008e-05	2.53552	0.00261861	0.243921	0.999993
75811	chr11	102086800	102089649	TRUE	Stable	3.27148	1.18217e-05	2.86552	0.000847221	0.128852	0.999993
75816	chr11	102184000	102184999	TRUE	Stable	3.68944	2.04696e-06	3.02425	0.00051484	0.301011	0.999993
75817	chr11	102185450	102185749	TRUE	Stable	3.03781	3.56252e-05	2.02338	0.0148575	0.128746	0.999993
75818	chr11	102189300	102189699	TRUE	Stable	2.18423	0.00223052	2.24073	0.0072453	0.406412	0.999993
75819	chr11	102189850	102190749	TRUE	Stable	2.58422	0.000331732	3.52488	0.000140568	-0.0629699	0.999993
75822	chr11	102229200	102230149	TRUE	Stable	3.43646	5.80636e-06	2.88285	0.000800611	0.175898	0.999993
75823	chr11	102230300	102230899	TRUE	Stable	2.4632	0.000600089	3.87675	6.77587e-05	-0.231666	0.999993
75825	chr11	102249000	102249849	TRUE	Stable	3.0649	3.12671e-05	3.28912	0.000243411	0.208653	0.999993
75832	chr11	102317650	102317799	TRUE	Stable	2.94006	5.7341e-05	2.08054	0.0123449	1.31436	0.999993
75833	chr11	102318200	102318949	TRUE	Stable	3.05429	3.28876e-05	2.7257	0.00135417	0.0354129	0.999993
75838	chr11	102406500	102408399	TRUE	Stable	2.99985	4.27639e-05	3.33096	0.000220543	0.168808	0.999993
75839	chr11	102408850	102409199	TRUE	Stable	3.11672	2.44589e-05	1.81605	0.0282982	0.481033	0.999993
75851	chr11	102602750	102603499	TRUE	Stable	2.85044	8.91597e-05	2.50909	0.00287313	0.238716	0.999993
75852	chr11	102603550	102604149	TRUE	Stable	2.93781	5.7922e-05	2.94064	0.000665479	0.286407	0.999993
75854	chr11	102605000	102606199	TRUE	Stable	2.59695	0.000312144	2.40268	0.00415698	0.152995	0.999993
75856	chr11	102607250	102609299	TRUE	Stable	3.12671	2.3296e-05	3.5329	0.000137299	0.0177233	0.999993
75859	chr11	102624600	102624799	TRUE	Stable	1.44357	0.0421774	2.83409	0.000941369	0.301045	0.999993
75862	chr11	102696750	102698449	TRUE	Stable	3.0646	3.13117e-05	2.96034	0.000625474	0.0960086	0.999993
75866	chr11	102774050	102774799	TRUE	Stable	3.27014	1.19032e-05	3.3203	0.000225483	0.184725	0.999993
75867	chr11	102817050	102820299	TRUE	Stable	3.42819	6.02738e-06	3.2324	0.000282458	-0.0958022	0.999993
75868	chr11	102879700	102880849	TRUE	Stable	3.03556	3.60418e-05	3.57022	0.000126628	0.0395073	0.999993
75869	chr11	102880950	102881849	TRUE	Stable	3.29905	1.0489e-05	2.97306	0.000600757	-0.113004	0.999993
75871	chr11	102924150	102924899	TRUE	Stable	3.30203	1.03731e-05	2.58084	0.00223262	0.226115	0.999993
75872	chr11	102925450	102925949	TRUE	Stable	2.79749	0.000115457	2.75232	0.00123802	0.241795	0.999993
75877	chr11	103016250	103016649	TRUE	Stable	2.61256	0.000288262	2.4037	0.0041431	-0.597621	0.999993
75878	chr11	103027350	103028249	TRUE	Stable	3.42266	6.18517e-06	3.36126	0.000203986	0.110981	0.999993
75897	chr11	103266650	103267349	TRUE	Stable	3.21596	1.52707e-05	3.31605	0.000228121	-0.276029	0.999993
75898	chr11	103267850	103268349	TRUE	Stable	2.38268	0.000883896	2.75214	0.00123894	-0.129621	0.999993
75906	chr11	103696800	103697649	TRUE	Stable	2.81032	0.000108363	2.45044	0.00352793	-0.0373528	0.999993
75907	chr11	103697950	103698549	TRUE	Stable	2.37195	0.000930532	2.56295	0.0023752	-0.364911	0.999993
75925	chr11	104442550	104443399	TRUE	Stable	2.73679	0.000156097	2.6119	0.00200426	0.197428	0.999993
75938	chr11	105180400	105181399	TRUE	Stable	3.30296	1.03309e-05	3.38339	0.000193005	0.118513	0.999993
75939	chr11	105181500	105183149	TRUE	Stable	3.35569	8.34763e-06	2.91535	0.000722188	0.181372	0.999993
75941	chr11	105291650	105293099	TRUE	Stable	2.96449	5.08789e-05	2.62724	0.00189888	0.223892	0.999993
75942	chr11	105293500	105294549	TRUE	Stable	3.29273	1.07813e-05	3.60453	0.000117327	0.186542	0.999993
75947	chr11	105589150	105589599	TRUE	Stable	1.77784	0.0124953	2.55287	0.00246081	-0.0353678	0.999993
75948	chr11	105589650	105590999	TRUE	Stable	3.62305	2.6808e-06	3.14051	0.000363799	0.0975414	0.999993
75960	chr11	106158650	106160199	TRUE	Stable	2.87268	7.99249e-05	3.11312	0.000394897	0.0918391	0.999993
75961	chr11	106160350	106161599	TRUE	Stable	2.8843	7.54352e-05	2.38568	0.00441749	0.317561	0.999993
75965	chr11	106216450	106216899	TRUE	Stable	3.39975	6.81623e-06	2.41221	0.00402854	0.318006	0.999993
75971	chr11	106268250	106268899	TRUE	Stable	3.59136	3.03299e-06	3.61141	0.000115659	0.152673	0.999993
75973	chr11	106271250	106272749	TRUE	Stable	3.2445	1.33985e-05	2.58821	0.00217592	-0.124112	0.999993
75974	chr11	106273300	106273649	TRUE	Stable	2.47491	0.000567488	2.06411	0.0130219	0.735151	0.999993
75986	chr11	106918900	106920199	TRUE	Stable	2.92056	6.30577e-05	3.29393	0.000240706	0.144583	0.999993
75988	chr11	106920900	106921449	TRUE	Stable	2.31904	0.00119395	2.64838	0.00176424	0.122064	0.999993
75991	chr11	107011800	107012549	TRUE	Stable	3.06455	3.13148e-05	2.91807	0.000715062	0.294332	0.999993
75994	chr11	107129650	107131499	TRUE	Stable	3.21598	1.52707e-05	3.72171	9.35254e-05	0.142508	0.999993
75995	chr11	107132200	107132949	TRUE	Stable	3.20206	1.62952e-05	3.16663	0.000337954	0.298907	0.999993
75999	chr11	107470900	107471549	TRUE	Stable	3.16036	1.98609e-05	3.09938	0.000411027	-0.112085	0.999993
76004	chr11	107546300	107547849	TRUE	Stable	3.31724	9.76759e-06	4.58302	8.65617e-06	0.0643027	0.999993
76005	chr11	107548050	107548749	TRUE	Stable	3.07758	2.93925e-05	2.70246	0.00146912	0.198641	0.999993
76021	chr11	108921000	108921299	TRUE	Stable	2.88439	7.53993e-05	2.17606	0.00900193	-0.401542	0.999993
76022	chr11	108921650	108922799	TRUE	Stable	3.44441	5.61423e-06	3.10341	0.00040626	0.325144	0.999993
76035	chr11	109362950	109364049	TRUE	Stable	2.69884	0.000187897	3.62696	0.000112579	0.232426	0.999993
76037	chr11	109425300	109425849	TRUE	Stable	2.66965	0.000217503	2.81102	0.00101799	0.0332746	0.999993
76038	chr11	109426150	109426849	TRUE	Stable	3.01723	3.92738e-05	3.3566	0.000206128	-0.0664618	0.999993
76040	chr11	109471900	109474399	TRUE	Stable	4.30237	1.71673e-07	3.26785	0.000257202	0.331199	0.999993
76067	chr11	112783200	112785799	TRUE	Stable	3.11031	2.52207e-05	3.20234	0.000306423	0.0524536	0.999993
76084	chr11	113684450	113685249	TRUE	Stable	3.13218	2.27345e-05	2.58429	0.00220534	0.186385	0.999993
76087	chr11	113748600	113751749	TRUE	Stable	3.26598	1.21306e-05	2.97474	0.000597964	0.0856006	0.999993
76089	chr11	113785550	113786649	TRUE	Stable	2.49488	0.000514884	2.80099	0.00105164	0.308447	0.999993
76120	chr11	115186500	115187349	TRUE	Stable	2.62453	0.000271693	2.92818	0.000691983	-0.0308636	0.999993
76121	chr11	115187550	115188249	TRUE	Stable	3.65914	2.33417e-06	3.33906	0.000215836	0.352835	0.999993
76132	chr11	115403300	115403649	TRUE	Stable	1.66514	0.019207	3.06885	0.000449059	-0.203686	0.999993
76133	chr11	115404150	115404799	TRUE	Stable	2.39506	0.00083301	3.44374	0.000167115	-0.0459116	0.999993
76136	chr11	115418900	115419799	TRUE	Stable	3.21024	1.56679e-05	2.68227	0.00157321	0.173581	0.999993
76137	chr11	115420400	115421499	TRUE	Stable	3.57895	3.20128e-06	2.9829	0.000583671	0.145281	0.999993
76146	chr11	115563650	115565649	TRUE	Stable	3.33473	9.11714e-06	3.12716	0.000378053	0.19623	0.999993
76154	chr11	115707000	115708349	TRUE	Stable	3.03036	3.69756e-05	3.04943	0.000476166	-0.148189	0.999993
76155	chr11	115708650	115709849	TRUE	Stable	3.4152	6.38408e-06	3.50154	0.000146902	0.0564302	0.999993
76161	chr11	115812750	115815699	TRUE	Stable	3.22375	1.47128e-05	2.96499	0.000616065	0.0750007	0.999993
76171	chr11	116012100	116013149	TRUE	Stable	2.80902	0.000109039	2.52087	0.00275559	0.163355	0.999993
76175	chr11	116029600	116030049	TRUE	Stable	1.70602	0.0164693	3.33573	0.000218001	-0.666989	0.999993
76176	chr11	116030550	116031649	TRUE	Stable	3.20075	1.63987e-05	2.72291	0.00136892	-0.0528492	0.999993
76188	chr11	116198100	116198799	TRUE	Stable	3.9266	7.85245e-07	2.55313	0.00245936	0.135051	0.999993
76189	chr11	116199250	116199799	TRUE	Stable	3.20167	1.63227e-05	3.63933	0.000110552	-0.407297	0.999993
76220	chr11	116841450	116843349	TRUE	Stable	3.11067	2.51765e-05	3.44991	0.000164589	0.0014227	0.999993
76221	chr11	116843650	116844599	TRUE	Stable	2.88616	7.47239e-05	3.49285	0.0001495	0.0698955	0.999993
76224	chr11	116853300	116854649	TRUE	Stable	2.66721	0.000220056	3.32307	0.000223755	0.128912	0.999993
76232	chr11	117114450	117114949	TRUE	Stable	3.15125	2.07782e-05	2.55611	0.00243516	0.310406	0.999993
76233	chr11	117115200	117116899	TRUE	Stable	3.47777	4.87901e-06	3.16636	0.000338082	0.227355	0.999993
76239	chr11	117265300	117266149	TRUE	Stable	2.49588	0.000512258	3.11147	0.000396672	-0.0414167	0.999993
76240	chr11	117266500	117267599	TRUE	Stable	3.01846	3.90772e-05	2.14978	0.00981501	0.0284626	0.999993
76248	chr11	117407700	117408349	TRUE	Stable	3.54154	3.73545e-06	2.6328	0.00186269	0.0667171	0.999993
76253	chr11	117598500	117599849	TRUE	Stable	2.43613	0.000684658	3.17038	0.000334337	0.176339	0.999993
76255	chr11	117653450	117654549	TRUE	Stable	3.31686	9.78119e-06	3.05156	0.000472693	0.0406236	0.999993
76256	chr11	117655050	117656649	TRUE	Stable	3.75182	1.57899e-06	2.95604	0.000633651	0.0485117	0.999993
76257	chr11	117779250	117781449	TRUE	Stable	3.63703	2.54593e-06	2.91581	0.00072099	0.261768	0.999993
76262	chr11	117824400	117826799	TRUE	Stable	3.35574	8.34578e-06	3.03935	0.000490298	0.104689	0.999993
76264	chr11	117848100	117849149	TRUE	Stable	3.09715	2.67881e-05	2.72459	0.00135976	0.0996699	0.999993
76265	chr11	117849350	117850499	TRUE	Stable	3.62298	2.6808e-06	2.78459	0.00111024	0.0219981	0.999993
76271	chr11	117963200	117964249	TRUE	Stable	2.78029	0.000125672	2.75835	0.00121105	-0.158952	0.999993
76272	chr11	117967550	117970099	TRUE	Stable	3.57403	3.26301e-06	3.58958	0.000122072	0.196077	0.999993
76278	chr11	118239900	118240049	TRUE	Stable	2.17356	0.00233868	2.1197	0.0108628	0.162055	0.999993
76287	chr11	118418100	118418999	TRUE	Stable	2.96484	5.07941e-05	2.87915	0.000809256	0.204474	0.999993
76288	chr11	118419200	118420049	TRUE	Stable	2.63672	0.00025568	2.60383	0.00206185	-0.0868483	0.999993
76294	chr11	118907900	118908149	TRUE	Stable	1.98365	0.00538704	2.02103	0.014963	-0.00701423	0.999993
76299	chr11	119022300	119022999	TRUE	Stable	2.54605	0.000400489	2.5415	0.0025622	-0.0283368	0.999993
76300	chr11	119023400	119024849	TRUE	Stable	3.99008	6.24951e-07	2.15778	0.00955803	0.075985	0.999993
76305	chr11	119039750	119040949	TRUE	Stable	3.50737	4.28365e-06	3.11778	0.000389192	0.156384	0.999993
76306	chr11	119041150	119042749	TRUE	Stable	3.41627	6.35342e-06	3.08139	0.000432841	0.088712	0.999993
76307	chr11	119042800	119042949	TRUE	Stable	2.16096	0.00247298	3.61471	0.000114968	-0.296177	0.999993
76308	chr11	119043200	119043549	TRUE	Stable	2.65514	0.000233445	2.32083	0.00552567	0.0189908	0.999993
76310	chr11	119046450	119046549	TRUE	Stable	2.14638	0.00264179	1.71709	0.0379568	-0.0258641	0.999993
76311	chr11	119046600	119047199	TRUE	Stable	1.9035	0.00753448	2.48501	0.00312716	0.283546	0.999993
76313	chr11	119052850	119054249	TRUE	Stable	3.27147	1.18217e-05	2.40196	0.00416805	0.24193	0.999993
76316	chr11	119083450	119083649	TRUE	Stable	2.24354	0.00169882	2.95827	0.000629779	0.133834	0.999993
76319	chr11	119089900	119091549	TRUE	Stable	3.32855	9.36793e-06	3.08954	0.000422798	0.158486	0.999993
76323	chr11	119227400	119229799	TRUE	Stable	3.39255	7.02383e-06	3.40869	0.000182351	0.0787571	0.999993
76328	chr11	119267650	119268599	TRUE	Stable	2.56959	0.000356644	3.11453	0.000393249	0.0897121	0.999993
76341	chr11	119602400	119602899	TRUE	Stable	2.74417	0.000150162	2.59251	0.00214417	0.136728	0.999993
76342	chr11	119603350	119604199	TRUE	Stable	3.6903	2.04081e-06	3.28198	0.000247782	0.155161	0.999993
76353	chr11	120185150	120187849	TRUE	Stable	3.28495	1.11501e-05	2.94026	0.000666238	0.16097	0.999993
76354	chr11	120187950	120189249	TRUE	Stable	3.33544	9.08655e-06	2.53305	0.00264083	0.131025	0.999993
76355	chr11	120190250	120190699	TRUE	Stable	1.84097	0.00972309	2.60913	0.00202297	-0.00982981	0.999993
76361	chr11	120229500	120231399	TRUE	Stable	3.32952	9.32412e-06	2.8106	0.0010189	0.159891	0.999993
76362	chr11	120231800	120232749	TRUE	Stable	2.57022	0.000355514	2.98644	0.00057816	0.0130515	0.999993
76363	chr11	120233050	120234349	TRUE	Stable	2.50629	0.000486725	3.10015	0.000410304	-0.0805549	0.999993
76364	chr11	120234450	120238749	TRUE	Stable	3.32643	9.44862e-06	3.06673	0.00045139	0.0749533	0.999993
76365	chr11	120238950	120240499	TRUE	Stable	3.25078	1.29983e-05	2.7494	0.00124929	0.0623777	0.999993
76366	chr11	120240650	120240849	TRUE	Stable	1.82753	0.0102668	2.33339	0.00529017	0.0607646	0.999993
76369	chr11	120304800	120305249	TRUE	Stable	3.26733	1.20534e-05	1.92562	0.020251	0.263385	0.999993
76370	chr11	120305450	120306249	TRUE	Stable	2.93853	5.77193e-05	2.53927	0.00258331	0.155316	0.999993
76371	chr11	120311100	120311849	TRUE	Stable	2.90798	6.70762e-05	2.23046	0.007506	0.406189	0.999993
76377	chr11	120348650	120350199	TRUE	Stable	3.68361	2.1053e-06	3.24856	0.000270123	0.132485	0.999993
76378	chr11	120350450	120351149	TRUE	Stable	3.25188	1.29548e-05	3.37573	0.000195767	0.115994	0.999993
76379	chr11	120377800	120378549	TRUE	Stable	3.28273	1.12525e-05	2.94749	0.000650376	0.0854565	0.999993
76380	chr11	120378600	120379199	TRUE	Stable	1.94394	0.00636823	3.23764	0.000278202	0.0386936	0.999993
76381	chr11	120436500	120437499	TRUE	Stable	2.95019	5.44306e-05	3.55501	0.000130957	0.120369	0.999993
76386	chr11	120483900	120484549	TRUE	Stable	2.80448	0.000111595	2.67804	0.00159715	-0.0488987	0.999993
76387	chr11	120484850	120485849	TRUE	Stable	2.84093	9.34166e-05	2.83886	0.000928477	-0.17827	0.999993
76393	chr11	120573450	120574599	TRUE	Stable	2.61471	0.000285131	2.97105	0.000604934	0.118144	0.999993
76394	chr11	120580100	120581399	TRUE	Stable	3.41502	6.38974e-06	3.11412	0.000393773	-0.177063	0.999993
76395	chr11	120581700	120582399	TRUE	Stable	2.73001	0.000161198	2.3097	0.00574373	0.40446	0.999993
76397	chr11	120598600	120599549	TRUE	Stable	3.47215	4.99757e-06	3.03655	0.000494938	0.395413	0.999993
76400	chr11	120624200	120625349	TRUE	Stable	3.09773	2.67198e-05	2.71797	0.00139294	-0.0769545	0.999993
76401	chr11	120625400	120625699	TRUE	Stable	3.09382	2.72144e-05	2.06623	0.0129302	0.509374	0.999993
76402	chr11	120632100	120633449	TRUE	Stable	3.72449	1.76429e-06	3.23122	0.000283069	0.211187	0.999993
76403	chr11	120633900	120634049	TRUE	Stable	1.7323	0.0149229	1.87756	0.0234786	0.367037	0.999993
76409	chr11	120673200	120674149	TRUE	Stable	2.41694	0.000750074	3.02279	0.000517181	-0.0223055	0.999993
76421	chr11	120821900	120824049	TRUE	Stable	3.35612	8.33143e-06	3.00365	0.000547941	-0.0340202	0.999993
76422	chr11	120824400	120824599	TRUE	Stable	2.08164	0.00352164	2.19653	0.00841213	0.136406	0.999993
76423	chr11	120824700	120825449	TRUE	Stable	2.55748	0.000378824	3.07783	0.000437756	0.174375	0.999993
76428	chr11	120991450	120991849	TRUE	Stable	2.29785	0.00131955	2.27476	0.00646142	-0.0424211	0.999993
76430	chr11	121203850	121204249	TRUE	Stable	2.258	0.00158908	2.97492	0.000597879	-0.254017	0.999993
76431	chr11	121204750	121205349	TRUE	Stable	3.40679	6.62621e-06	3.46988	0.000158746	0.282599	0.999993
76468	chr12	3806500	3808699	TRUE	Stable	4.14547	3.39989e-07	2.87561	0.000819078	0.548154	0.999993
76473	chr12	3891050	3891599	TRUE	Stable	3.33579	9.07438e-06	2.54262	0.00255255	-0.0655033	0.999993
76474	chr12	3891850	3893649	TRUE	Stable	3.20732	1.59155e-05	3.49481	0.000149196	0.114338	0.999993
76480	chr12	4233100	4233949	TRUE	Stable	2.83288	9.70328e-05	3.34605	0.000211667	0.023503	0.999993
76481	chr12	4234400	4234649	TRUE	Stable	1.53593	0.0306985	2.58519	0.00219876	-0.370694	0.999993
76487	chr12	4592450	4594049	TRUE	Stable	3.83721	1.10951e-06	3.35273	0.000208096	0.0994893	0.999993
76517	chr12	8673500	8674099	TRUE	Stable	2.68579	0.000200584	2.85885	0.000866583	0.415284	0.999993
76525	chr12	8847100	8847299	TRUE	Stable	2.86574	8.27579e-05	2.05135	0.0135797	0.0982471	0.999993
76527	chr12	8856150	8856299	TRUE	Stable	2.0108	0.00479431	2.34854	0.00502516	-0.457775	0.999993
76529	chr12	8921500	8921899	TRUE	Stable	2.69869	0.000187992	1.78247	0.0312956	0.398006	0.999993
76530	chr12	8922300	8922449	TRUE	Stable	1.64153	0.0209626	2.67764	0.00159967	0.591952	0.999993
76531	chr12	8922550	8923549	TRUE	Stable	3.46779	5.0902e-06	3.4286	0.000172684	0.0233335	0.999993
76533	chr12	8973450	8974649	TRUE	Stable	3.67004	2.23671e-06	3.55471	0.000130957	0.0624297	0.999993
76536	chr12	9030050	9030199	TRUE	Stable	1.62551	0.0222356	2.1817	0.00883434	0.122363	0.999993
76537	chr12	9030250	9031099	TRUE	Stable	2.83662	9.52935e-05	3.02878	0.000507218	-0.107827	0.999993
76544	chr12	9579850	9579949	TRUE	Stable	1.54336	0.029908	2.78483	0.00110929	-0.786635	0.999993
76548	chr12	10390550	10390799	TRUE	Stable	3.50655	4.29985e-06	2.13186	0.0104256	-0.0174736	0.999993
76549	chr12	10390900	10391649	TRUE	Stable	2.81521	0.000105915	2.95905	0.000628428	0.16345	0.999993
76552	chr12	11264700	11265749	TRUE	Stable	3.03342	3.64284e-05	3.31526	0.000228406	-0.139059	0.999993
76553	chr12	11266200	11267749	TRUE	Stable	3.42048	6.24102e-06	3.0831	0.000430758	0.047993	0.999993
76572	chr12	12937600	12941899	TRUE	Stable	2.76998	0.000132327	3.18964	0.000316214	-0.247652	0.999993
76573	chr12	12942150	12942449	TRUE	Stable	2.61781	0.000280611	2.79912	0.00105862	-0.555043	0.999993
76574	chr12	12942550	12943149	TRUE	Stable	3.05779	3.2345e-05	3.16074	0.000342631	0.223388	0.999993
76576	chr12	13049200	13049649	TRUE	Stable	2.00441	0.00492448	2.71656	0.00139966	0.115477	0.999993
76585	chr12	15813850	15816799	TRUE	Stable	3.86667	9.9276e-07	3.77347	8.35952e-05	0.0389948	0.999993
76588	chr12	16799500	16801649	TRUE	Stable	3.48669	4.69606e-06	2.52168	0.00274907	0.185165	0.999993
76604	chr12	17544000	17544549	TRUE	Stable	3.60554	2.86324e-06	2.58876	0.00217126	0.324362	0.999993
76605	chr12	17545150	17546499	TRUE	Stable	3.00756	4.11284e-05	3.24906	0.000269883	0.117856	0.999993
76608	chr12	17710800	17710999	TRUE	Stable	1.75126	0.0138655	2.39337	0.00429827	-0.215036	0.999993
76639	chr12	21111250	21111699	TRUE	Stable	2.50781	0.000483338	2.192	0.00853811	0.271229	0.999993
76640	chr12	21111850	21112199	TRUE	Stable	2.15614	0.00252755	1.65538	0.0452663	-0.156546	0.999993
76647	chr12	21372500	21373399	TRUE	Stable	3.19714	1.66803e-05	2.76739	0.00117626	0.252337	0.999993
76648	chr12	21373750	21374049	TRUE	Stable	2.81732	0.000104824	2.52735	0.00269501	0.486597	0.999993
76649	chr12	21374200	21374449	TRUE	Stable	2.61967	0.00027808	2.81837	0.000992958	-0.344856	0.999993
76690	chr12	24706700	24708299	TRUE	Stable	4.16824	3.14103e-07	3.33527	0.000218174	-0.0297307	0.999993
76693	chr12	24830400	24831149	TRUE	Stable	2.65862	0.000229493	3.00973	0.000537916	-0.0328575	0.999993
76694	chr12	24831800	24833049	TRUE	Stable	3.34609	8.68861e-06	3.47482	0.000156608	0.0463374	0.999993
76697	chr12	25092500	25093199	TRUE	Stable	3.0401	3.52312e-05	3.05603	0.000466682	0.341523	0.999993
76699	chr12	25096250	25097349	TRUE	Stable	3.26429	1.22245e-05	2.8498	0.000894047	-0.0446521	0.999993
76700	chr12	25097500	25098849	TRUE	Stable	3.00302	4.20759e-05	2.91392	0.000725518	0.218825	0.999993
76701	chr12	25099050	25099449	TRUE	Stable	3.56032	3.45786e-06	3.27699	0.000250698	0.557023	0.999993
76702	chr12	25099700	25101449	TRUE	Stable	3.45691	5.33069e-06	3.08328	0.000430452	0.193292	0.999993
76710	chr12	26468950	26470499	TRUE	Stable	3.33616	9.06222e-06	3.54774	0.000132942	-0.0573866	0.999993
76723	chr12	27342900	27343449	TRUE	Stable	2.44134	0.000667786	3.24583	0.000271734	0.0231321	0.999993
76724	chr12	27343500	27344449	TRUE	Stable	3.50897	4.25419e-06	3.2005	0.000307757	0.13381	0.999993
76737	chr12	28675500	28675999	TRUE	Stable	2.45339	0.00062917	2.74775	0.00125656	0.337621	0.999993
76742	chr12	28799600	28799799	TRUE	Stable	1.78851	0.0119753	1.70181	0.0396537	0.923736	0.999993
76744	chr12	29049550	29049699	TRUE	Stable	2.05536	0.00395175	2.4673	0.00332829	-0.500377	0.999993
76752	chr12	29938250	29939749	TRUE	Stable	3.36305	8.0645e-06	3.2972	0.000239387	0.0434728	0.999993
76756	chr12	30603900	30604099	TRUE	Stable	3.73963	1.65969e-06	1.73943	0.035537	0.347046	0.999993
76762	chr12	31264650	31266799	TRUE	Stable	3.42242	6.19365e-06	3.56361	0.000128349	-0.0349818	0.999993
76765	chr12	31350250	31351099	TRUE	Stable	3.09998	2.64503e-05	3.01778	0.000524145	0.105609	0.999993
76766	chr12	31351600	31351999	TRUE	Stable	2.79391	0.000117474	2.0712	0.0127257	0.419511	0.999993
76775	chr12	31948600	31949499	TRUE	Stable	3.49555	4.52935e-06	3.41127	0.00018133	0.204438	0.999993
76779	chr12	32378700	32379599	TRUE	Stable	2.73158	0.000160023	2.4872	0.00310481	-0.147941	0.999993
76781	chr12	32819450	32820149	TRUE	Stable	2.57393	0.000348789	3.35197	0.000208639	0.0424074	0.999993
76782	chr12	32820750	32821299	TRUE	Stable	2.79398	0.000117436	3.45035	0.000164589	0.045352	0.999993
76784	chr12	32954250	32955699	TRUE	Stable	3.8607	1.01918e-06	2.89671	0.000767504	0.226085	0.999993
76792	chr12	33345000	33346199	TRUE	Stable	2.86343	8.37051e-05	2.42495	0.0038542	-0.0226592	0.999993
76845	chr12	40036600	40038699	TRUE	Stable	3.20601	1.5999e-05	2.89874	0.000762114	0.155873	0.999993
76851	chr12	40445050	40445649	TRUE	Stable	3.87962	9.52464e-07	3.35095	0.000209168	0.235494	0.999993
76852	chr12	40446100	40448049	TRUE	Stable	3.67909	2.14394e-06	3.45527	0.00016324	0.229477	0.999993
76865	chr12	44268400	44268999	TRUE	Stable	2.01398	0.00472759	3.78231	8.20594e-05	-0.0151004	0.999993
76866	chr12	44269100	44269299	TRUE	Stable	1.67378	0.018596	1.69172	0.0408194	-0.175528	0.999993
76867	chr12	44269400	44270099	TRUE	Stable	3.34836	8.6119e-06	2.60714	0.00203727	0.226386	0.999993
76888	chr12	51347500	51348149	TRUE	Stable	3.13984	2.19133e-05	3.7583	8.66121e-05	0.320559	0.999993
76897	chr12	51828200	51829049	TRUE	Stable	2.57827	0.000341067	2.70492	0.00145783	-0.173479	0.999993
76900	chr12	51970250	51971249	TRUE	Stable	3.25246	1.29191e-05	3.24713	0.000270644	0.0380977	0.999993
76901	chr12	51971600	51971899	TRUE	Stable	2.48693	0.000535385	2.39948	0.00420485	0.411791	0.999993
76907	chr12	52602550	52603649	TRUE	Stable	2.60016	0.000306896	3.33587	0.000218001	-0.239124	0.999993
76908	chr12	52603850	52604749	TRUE	Stable	2.75517	0.000142278	2.655	0.0017256	-0.213528	0.999993
76909	chr12	52605000	52605349	TRUE	Stable	2.27982	0.00143556	2.29295	0.00607739	0.276102	0.999993
76918	chr12	53253550	53254449	TRUE	Stable	2.71666	0.000171895	3.10419	0.000405165	0.0179545	0.999993
76932	chr12	54713700	54714349	TRUE	Stable	2.94605	5.56544e-05	2.97739	0.00059342	0.0610182	0.999993
76934	chr12	54734650	54735349	TRUE	Stable	3.49249	4.59684e-06	2.08624	0.0121175	0.167838	0.999993
76935	chr12	54738600	54739249	TRUE	Stable	2.77318	0.000130193	2.39522	0.00427018	0.131241	0.999993
76937	chr12	54794350	54795599	TRUE	Stable	3.63384	2.5731e-06	3.12316	0.000382359	0.334745	0.999993
76939	chr12	54862950	54863499	TRUE	Stable	3.20159	1.63303e-05	3.28743	0.000244465	0.480781	0.999993
76961	chr12	55835800	55835949	TRUE	Stable	1.92188	0.00698154	1.68818	0.0412324	-0.22144	0.999993
76977	chr12	56695550	56697399	TRUE	Stable	2.80545	0.000111067	2.99538	0.000562224	0.0412157	0.999993
76978	chr12	56697450	56698249	TRUE	Stable	3.24527	1.33483e-05	2.46435	0.00336394	0.169429	0.999993
76985	chr12	57230050	57230349	TRUE	Stable	2.89346	7.21423e-05	2.23766	0.00731663	0.498209	0.999993
76986	chr12	57230550	57231399	TRUE	Stable	3.52593	3.99019e-06	1.72987	0.0365609	0.00537249	0.999993
76988	chr12	57538400	57539249	TRUE	Stable	3.51078	4.23088e-06	2.88396	0.000798043	0.218229	0.999993
76996	chr12	59060300	59061449	TRUE	Stable	2.63768	0.000254595	2.8168	0.000998129	-0.0162038	0.999993
76997	chr12	59061550	59061699	TRUE	Stable	2.18035	0.00226805	2.14011	0.0101442	-0.0798012	0.999993
76998	chr12	59066200	59066749	TRUE	Stable	2.39322	0.000840784	2.67834	0.00159544	-0.0738771	0.999993
76999	chr12	59067300	59068149	TRUE	Stable	3.34574	8.70098e-06	3.00713	0.000542358	-0.0526961	0.999993
77000	chr12	59129900	59131349	TRUE	Stable	2.87953	7.72362e-05	2.82054	0.000985618	0.04764	0.999993
77001	chr12	59131500	59132549	TRUE	Stable	3.24939	1.31031e-05	2.41201	0.00403167	0.205081	0.999993
77009	chr12	64964550	64965499	TRUE	Stable	2.76235	0.000137577	3.07367	0.000443011	0.121556	0.999993
77010	chr12	64965900	64968949	TRUE	Stable	3.1178	2.43373e-05	3.04686	0.000479615	-0.0940547	0.999993
77019	chr12	65172800	65173299	TRUE	Stable	3.03795	3.5602e-05	2.50807	0.00288391	-0.0982051	0.999993
77020	chr12	65428200	65428749	TRUE	Stable	1.86418	0.00885458	2.5112	0.00285197	0.0710629	0.999993
77021	chr12	65428900	65429099	TRUE	Stable	2.54762	0.000397503	3.60394	0.000117327	0.368667	0.999993
77028	chr12	69167800	69169749	TRUE	Stable	2.82952	9.86871e-05	3.5357	0.000136706	0.00676799	0.999993
77039	chr12	69361700	69362499	TRUE	Stable	3.35078	8.54211e-06	2.65059	0.00175144	0.209634	0.999993
77041	chr12	69371200	69371849	TRUE	Stable	2.78557	0.000122394	3.14527	0.000358453	-0.122155	0.999993
77042	chr12	69372350	69372549	TRUE	Stable	2.38546	0.000872161	1.89622	0.0221533	0.552592	0.999993
77050	chr12	69581850	69583699	TRUE	Stable	2.87121	8.05096e-05	3.31439	0.000228791	-0.155407	0.999993
77063	chr12	69985750	69987199	TRUE	Stable	3.19446	1.68654e-05	2.76808	0.00117342	0.0479535	0.999993
77064	chr12	69987250	69987549	TRUE	Stable	2.73621	0.000156502	2.76615	0.00118098	0.221353	0.999993
77065	chr12	70110500	70112349	TRUE	Stable	3.54854	3.63677e-06	3.52364	0.000140568	0.012453	0.999993
77075	chr12	70824250	70825049	TRUE	Stable	2.93824	5.77955e-05	2.78864	0.00109591	0.294282	0.999993
77085	chr12	71014350	71015199	TRUE	Stable	3.05627	3.25785e-05	3.02042	0.000519742	0.200091	0.999993
77091	chr12	71136850	71137049	TRUE	Stable	2.58069	0.000337326	1.99742	0.0161399	-0.236362	0.999993
77092	chr12	71137450	71138749	TRUE	Stable	3.29641	1.06204e-05	3.12551	0.000379723	0.232627	0.999993
77095	chr12	71309200	71311749	TRUE	Stable	3.66162	2.312e-06	2.8708	0.000832532	0.303106	0.999993
77108	chr12	72441200	72442299	TRUE	Stable	3.1455	2.1361e-05	3.53021	0.00013822	-0.259942	0.999993
77114	chr12	72759950	72761099	TRUE	Stable	2.94666	5.54543e-05	3.11078	0.000397472	0.212584	0.999993
77115	chr12	72761850	72762849	TRUE	Stable	3.41613	6.35632e-06	3.53614	0.000136612	0.289853	0.999993
77130	chr12	73044350	73047099	TRUE	Stable	2.93985	5.73861e-05	2.7964	0.00106829	0.105274	0.999993
77131	chr12	73051250	73052099	TRUE	Stable	2.43221	0.000698355	2.70474	0.00145864	-0.317113	0.999993
77134	chr12	73110300	73112149	TRUE	Stable	3.28329	1.12323e-05	3.07862	0.000436628	0.272282	0.999993
77135	chr12	73112400	73113349	TRUE	Stable	3.19525	1.68254e-05	2.71144	0.00142434	0.366904	0.999993
77136	chr12	73113500	73113999	TRUE	Stable	2.83946	9.40023e-05	2.31169	0.00570557	-0.460945	0.999993
77142	chr12	73367300	73367649	TRUE	Stable	2.6388	0.000253245	2.60885	0.00202457	-0.122851	0.999993
77144	chr12	73521800	73522049	TRUE	Stable	1.88072	0.00827201	1.7165	0.0380195	0.0180673	0.999993
77145	chr12	73529000	73529249	TRUE	Stable	2.72523	0.000164713	2.09193	0.0118971	-0.0828398	0.999993
77171	chr12	75817850	75819849	TRUE	Stable	3.60334	2.89251e-06	3.53435	0.000136904	0.216679	0.999993
77173	chr12	75834750	75834949	TRUE	Stable	2.31444	0.00121877	1.63964	0.0473226	0.267648	0.999993
77175	chr12	76072050	76073799	TRUE	Stable	2.58589	0.000329174	3.16662	0.000337954	0.0899623	0.999993
77182	chr12	76254700	76255099	TRUE	Stable	2.43221	0.000698355	2.91866	0.00071369	-0.242765	0.999993
77183	chr12	76255350	76256899	TRUE	Stable	3.66857	2.24934e-06	3.33945	0.000215674	0.22798	0.999993
77187	chr12	76368050	76370299	TRUE	Stable	3.34875	8.59731e-06	3.65047	0.000109493	0.231319	0.999993
77188	chr12	76370500	76370999	TRUE	Stable	2.81777	0.000104635	1.79353	0.0302697	0.193509	0.999993
77189	chr12	76371300	76372249	TRUE	Stable	3.63763	2.54026e-06	3.41954	0.000176818	0.0434224	0.999993
77196	chr12	76532750	76535149	TRUE	Stable	3.55272	3.56782e-06	3.18337	0.000322491	0.133049	0.999993
77203	chr12	76837100	76837399	TRUE	Stable	2.54696	0.000398802	3.43846	0.00016914	0.52041	0.999993
77204	chr12	76837750	76838649	TRUE	Stable	3.07988	2.909e-05	3.22676	0.000285649	-0.0755026	0.999993
77220	chr12	78749300	78750049	TRUE	Stable	2.41655	0.000751273	3.283	0.000247149	-0.182943	0.999993
77227	chr12	79028600	79029999	TRUE	Stable	3.87377	9.7386e-07	2.9004	0.000757583	0.154172	0.999993
77230	chr12	79171450	79173249	TRUE	Stable	3.20573	1.60202e-05	2.71943	0.00138525	0.0713865	0.999993
77242	chr12	80020900	80021099	TRUE	Stable	1.59198	0.0251419	2.26358	0.00671027	-0.088904	0.999993
77245	chr12	80022450	80022849	TRUE	Stable	2.6295	0.000265055	2.28222	0.00630647	0.183281	0.999993
77248	chr12	80109650	80110899	TRUE	Stable	3.11038	2.52159e-05	2.79366	0.00107763	-0.104542	0.999993
77249	chr12	80111000	80111699	TRUE	Stable	3.09784	2.67064e-05	3.15169	0.000351779	0.219064	0.999993
77252	chr12	80113550	80116599	TRUE	Stable	3.1874	1.74515e-05	3.27431	0.0002524	0.0616696	0.999993
77257	chr12	80258500	80259499	TRUE	Stable	3.12087	2.39916e-05	2.58219	0.00222249	0.190847	0.999993
77258	chr12	80259850	80260049	TRUE	Stable	2.44635	0.000651398	2.1401	0.0101442	0.15344	0.999993
77259	chr12	80260500	80261549	TRUE	Stable	3.09445	2.71232e-05	3.15191	0.000351497	-0.00567473	0.999993
77261	chr12	80434500	80434799	TRUE	Stable	1.65599	0.0198654	2.53178	0.00265291	-0.363494	0.999993
77262	chr12	80435100	80435699	TRUE	Stable	2.55109	0.000390759	2.14092	0.0101202	0.132634	0.999993
77263	chr12	80436150	80437349	TRUE	Stable	2.80947	0.000108782	3.0678	0.000450541	0.238252	0.999993
77273	chr12	80790000	80790249	TRUE	Stable	1.42783	0.0445004	2.97684	0.000594257	-0.143888	0.999993
77274	chr12	80790750	80791799	TRUE	Stable	3.28636	1.10886e-05	3.11107	0.000397107	0.11684	0.999993
77281	chr12	81003400	81003549	TRUE	Stable	1.56239	0.027954	1.74744	0.0347122	0.0886436	0.999993
77283	chr12	81026650	81028499	TRUE	Stable	2.88228	7.61865e-05	2.81368	0.00100909	0.18082	0.999993
77302	chr12	82168850	82169249	TRUE	Stable	2.47924	0.000555846	2.64069	0.00181225	-0.0690907	0.999993
77303	chr12	82169600	82171499	TRUE	Stable	3.79873	1.30681e-06	3.19155	0.000314418	0.0962477	0.999993
77316	chr12	83631500	83632049	TRUE	Stable	2.75154	0.000144823	2.8349	0.000939924	-0.0505931	0.999993
77322	chr12	83920400	83921749	TRUE	Stable	3.16067	1.98303e-05	2.78451	0.00111054	0.04524	0.999993
77334	chr12	84191800	84194149	TRUE	Stable	4.18719	2.93477e-07	3.45894	0.000162152	0.10286	0.999993
77335	chr12	84194300	84194649	TRUE	Stable	2.33205	0.00112269	1.94581	0.0190049	0.0559826	0.999993
77371	chr12	85270000	85270899	TRUE	Stable	2.41692	0.000750138	2.43736	0.00369309	0.108263	0.999993
77380	chr12	85454900	85455299	TRUE	Stable	2.23126	0.0017964	2.68828	0.00154164	0.147285	0.999993
77381	chr12	85455500	85456199	TRUE	Stable	2.863	8.39079e-05	3.3138	0.00022913	0.0858699	0.999993
77384	chr12	85485350	85486049	TRUE	Stable	2.13915	0.00272787	2.3997	0.00420203	0.116149	0.999993
77385	chr12	85486150	85487449	TRUE	Stable	3.53361	3.86172e-06	3.2966	0.000239545	0.117263	0.999993
77406	chr12	86678250	86680099	TRUE	Stable	3.51008	4.24177e-06	3.67018	0.000104228	0.0621653	0.999993
77415	chr12	86881750	86884949	TRUE	Stable	3.89973	8.83129e-07	3.36218	0.000203705	0.240306	0.999993
77416	chr12	86885050	86885549	TRUE	Stable	3.19985	1.64683e-05	3.53779	0.000135933	0.0891273	0.999993
77421	chr12	86893050	86894399	TRUE	Stable	3.22482	1.46423e-05	2.81259	0.00101239	-0.0519942	0.999993
77423	chr12	86894800	86895499	TRUE	Stable	3.21087	1.56118e-05	3.48064	0.000154461	-0.177409	0.999993
77458	chr12	91590550	91590999	TRUE	Stable	2.76863	0.000133186	3.2755	0.000251587	0.125118	0.999993
77473	chr12	95693800	95696149	TRUE	Stable	3.65244	2.3865e-06	3.26874	0.000256574	0.0707025	0.999993
77481	chr12	98258300	98259249	TRUE	Stable	3.12874	2.30885e-05	3.04524	0.000481587	0.154883	0.999993
77482	chr12	98259500	98259999	TRUE	Stable	3.13696	2.2206e-05	2.34678	0.00505614	0.0465847	0.999993
77488	chr12	98747450	98748549	TRUE	Stable	2.96074	5.18198e-05	2.74954	0.00124894	0.0358667	0.999993
77490	chr12	98919850	98921049	TRUE	Stable	2.75895	0.000139791	2.97945	0.000590029	0.183528	0.999993
77494	chr12	99392300	99394149	TRUE	Stable	3.29449	1.07092e-05	2.616	0.00197453	0.204359	0.999993
77497	chr12	99561450	99564299	TRUE	Stable	3.83569	1.11651e-06	3.11965	0.000386705	0.179267	0.999993
77501	chr12	99883550	99884449	TRUE	Stable	3.34882	8.5942e-06	4.13805	3.62841e-05	0.0941676	0.999993
77502	chr12	99884700	99885699	TRUE	Stable	3.19032	1.71831e-05	2.86607	0.000845939	0.0348654	0.999993
77505	chr12	100158650	100159699	TRUE	Stable	3.05098	3.34295e-05	3.15741	0.000345718	-0.199506	0.999993
77507	chr12	100186500	100187549	TRUE	Stable	3.38609	7.23711e-06	3.13056	0.000373999	0.145103	0.999993
77508	chr12	100187700	100188449	TRUE	Stable	3.21558	1.52998e-05	3.5775	0.000124331	0.081431	0.999993
77515	chr12	100723950	100725049	TRUE	Stable	3.53473	3.84453e-06	2.60231	0.00207195	0.146024	0.999993
77516	chr12	100725550	100726049	TRUE	Stable	2.55356	0.000386009	2.34416	0.0051003	0.239764	0.999993
77523	chr12	101082900	101083049	TRUE	Stable	2.79663	0.000115998	2.53774	0.00259762	0.53259	0.999993
77524	chr12	101083750	101084649	TRUE	Stable	2.92651	6.11528e-05	2.72823	0.00134325	0.0915573	0.999993
77526	chr12	101818250	101819699	TRUE	Stable	2.96628	5.04498e-05	3.0535	0.000469907	0.0937987	0.999993
77537	chr12	102469300	102470149	TRUE	Stable	3.13596	2.23246e-05	2.72703	0.00134854	0.0116866	0.999993
77559	chr12	104472400	104473349	TRUE	Stable	3.33915	8.95049e-06	3.68306	0.000102116	0.414426	0.999993
77585	chr12	105453550	105455349	TRUE	Stable	3.23138	1.4236e-05	3.38713	0.000191701	0.0760586	0.999993
77590	chr12	105784050	105784549	TRUE	Stable	2.83868	9.4315e-05	2.84462	0.00091019	0.168699	0.999993
77591	chr12	105785300	105786199	TRUE	Stable	3.05797	3.23261e-05	3.33931	0.000215674	0.0259568	0.999993
77611	chr12	107979550	107979899	TRUE	Stable	2.45789	0.000615776	2.58437	0.00220482	-0.284063	0.999993
77612	chr12	107980000	107981349	TRUE	Stable	3.44937	5.49983e-06	2.46796	0.00332188	0.00178711	0.999993
77614	chr12	108001100	108002749	TRUE	Stable	4.09814	4.25451e-07	2.94653	0.000652373	-0.0169914	0.999993
77615	chr12	108002850	108006449	TRUE	Stable	3.39674	6.90512e-06	3.24985	0.000269225	0.0225542	0.999993
77618	chr12	108273100	108275449	TRUE	Stable	3.64745	2.44834e-06	3.65043	0.000109493	0.269713	0.999993
77619	chr12	108275900	108277699	TRUE	Stable	3.42833	6.02738e-06	3.58519	0.000122501	0.0855923	0.999993
77631	chr12	108791400	108792599	TRUE	Stable	2.82967	9.86157e-05	3.47381	0.000156939	-0.087352	0.999993
77632	chr12	108793550	108793849	TRUE	Stable	1.88261	0.00820721	2.71195	0.00142199	0.16809	0.999993
77633	chr12	108794400	108795849	TRUE	Stable	3.24834	1.3158e-05	3.24462	0.000272589	0.119512	0.999993
77634	chr12	108835100	108835849	TRUE	Stable	3.71789	1.81841e-06	2.72579	0.00135374	0.232941	0.999993
77635	chr12	108836200	108837199	TRUE	Stable	2.93501	5.86629e-05	3.00505	0.000545868	0.17977	0.999993
77649	chr12	109449650	109450549	TRUE	Stable	3.24353	1.34597e-05	3.13482	0.000369532	0.366046	0.999993
77658	chr12	110187300	110188199	TRUE	Stable	2.99035	4.48846e-05	1.90394	0.0216336	0.278757	0.999993
77659	chr12	110188400	110189049	TRUE	Stable	2.46466	0.000595852	2.06025	0.0131915	0.23136	0.999993
77669	chr12	110590350	110591499	TRUE	Stable	3.44441	5.61423e-06	2.8045	0.00103896	0.178775	0.999993
77670	chr12	110591750	110592499	TRUE	Stable	3.28662	1.10757e-05	3.52474	0.000140568	0.168413	0.999993
77673	chr12	110694750	110696049	TRUE	Stable	3.06949	3.05951e-05	2.95059	0.000643699	-0.0596392	0.999993
77675	chr12	110696700	110697149	TRUE	Stable	2.73803	0.000155121	2.42871	0.00380118	0.327498	0.999993
77677	chr12	110737100	110737849	TRUE	Stable	2.85137	8.87407e-05	3.13638	0.000368242	0.091693	0.999993
77678	chr12	110738250	110739149	TRUE	Stable	3.40572	6.65355e-06	2.79264	0.00108082	0.265244	0.999993
77691	chr12	111038000	111039099	TRUE	Stable	3.50609	4.30471e-06	3.20452	0.00030482	0.124156	0.999993
77700	chr12	111376400	111377449	TRUE	Stable	3.14957	2.09413e-05	3.10935	0.000399004	-0.203724	0.999993
77701	chr12	111377850	111378749	TRUE	Stable	3.28027	1.13637e-05	2.84771	0.000901044	0.253709	0.999993
77708	chr12	111537000	111537849	TRUE	Stable	2.79186	0.000118679	2.7325	0.00132362	-0.0544494	0.999993
77709	chr12	111538300	111538499	TRUE	Stable	2.51775	0.00046069	2.1517	0.00975386	-0.115533	0.999993
77710	chr12	111538750	111539549	TRUE	Stable	2.53168	0.000429913	2.6545	0.00172873	0.111241	0.999993
77716	chr12	111677600	111678049	TRUE	Stable	2.56232	0.000369585	2.86526	0.000848009	0.104978	0.999993
77717	chr12	111678100	111679049	TRUE	Stable	3.26853	1.19789e-05	3.26608	0.000258194	0.143052	0.999993
77721	chr12	111812800	111813749	TRUE	Stable	2.52885	0.000436008	2.67666	0.00160575	0.184463	0.999993
77722	chr12	111814250	111815149	TRUE	Stable	3.16793	1.91575e-05	3.09015	0.000422065	0.150319	0.999993
77723	chr12	111907050	111908799	TRUE	Stable	3.8525	1.04268e-06	3.47511	0.000156441	0.318023	0.999993
77724	chr12	111966000	111966899	TRUE	Stable	3.09007	2.76791e-05	3.07612	0.000440226	0.0588921	0.999993
77743	chr12	112692850	112694249	TRUE	Stable	3.34237	8.82304e-06	3.14637	0.000357424	0.148372	0.999993
77754	chr12	112928450	112930149	TRUE	Stable	2.90984	6.65243e-05	3.18203	0.00032377	-0.101225	0.999993
77755	chr12	112941500	112941849	TRUE	Stable	2.66007	0.000227855	2.80615	0.00103346	0.105219	0.999993
77756	chr12	112942150	112942599	TRUE	Stable	2.8133	0.000106904	2.5253	0.0027146	0.484623	0.999993
77763	chr12	112999450	113000649	TRUE	Stable	2.65915	0.000228921	2.88914	0.000786106	0.17208	0.999993
77774	chr12	113155000	113155999	TRUE	Stable	2.66289	0.000224802	3.56589	0.000127913	0.284645	0.999993
77775	chr12	113156500	113157299	TRUE	Stable	3.09466	2.70945e-05	3.41098	0.000181463	0.257854	0.999993
77787	chr12	116404350	116405099	TRUE	Stable	3.1185	2.42606e-05	1.84826	0.0256921	0.191229	0.999993
77788	chr12	116405500	116406399	TRUE	Stable	2.98782	4.54721e-05	2.95088	0.000643421	0.109476	0.999993
77806	chr12	117843200	117845249	TRUE	Stable	3.03866	3.54772e-05	3.01788	0.000523979	0.127876	0.999993
77821	chr12	118846450	118847399	TRUE	Stable	2.97685	4.79742e-05	2.99977	0.000554204	0.282212	0.999993
77823	chr12	118848400	118848899	TRUE	Stable	1.65929	0.019628	2.7767	0.00113929	-0.387151	0.999993
77831	chr13	3359150	3361549	TRUE	Stable	2.96827	4.99321e-05	2.94264	0.00066055	0.221398	0.999993
77848	chr13	6548250	6549199	TRUE	Stable	2.86345	8.37031e-05	2.69723	0.00149539	-0.0115947	0.999993
77855	chr13	8885100	8885599	TRUE	Stable	2.88683	7.44793e-05	3.32355	0.000223714	0.129905	0.999993
77856	chr13	8886000	8886749	TRUE	Stable	2.76061	0.00013862	3.46174	0.000161631	0.118667	0.999993
77862	chr13	9092950	9093549	TRUE	Stable	3.1186	2.4254e-05	3.06558	0.000453425	0.249643	0.999993
77863	chr13	9094000	9095349	TRUE	Stable	2.79058	0.000119456	3.0151	0.000528753	0.134831	0.999993
77875	chr13	12394550	12395049	TRUE	Stable	3.32024	9.64209e-06	2.85493	0.00087857	0.0130342	0.999993
77876	chr13	12395550	12396399	TRUE	Stable	3.51363	4.19695e-06	3.0245	0.000514344	0.0377197	0.999993
77885	chr13	13437050	13438699	TRUE	Stable	3.14607	2.13056e-05	2.99518	0.000562503	0.142632	0.999993
77892	chr13	13953550	13954299	TRUE	Stable	3.30238	1.03645e-05	2.84199	0.000918784	0.199243	0.999993
77893	chr13	13954950	13955599	TRUE	Stable	2.60458	0.000300122	2.80173	0.00104906	-0.152214	0.999993
77897	chr13	14062100	14063099	TRUE	Stable	3.23212	1.41907e-05	3.37921	0.000194515	-0.319179	0.999993
77907	chr13	15461600	15463249	TRUE	Stable	3.55317	3.56673e-06	3.18977	0.000316206	-0.087607	0.999993
77908	chr13	15463650	15463999	TRUE	Stable	1.45129	0.0411035	3.4454	0.000166348	0.316947	0.999993
77919	chr13	17185400	17185749	TRUE	Stable	1.49558	0.0353454	2.45074	0.00352421	0.191339	0.999993
77925	chr13	17804950	17805099	TRUE	Stable	1.73034	0.0150326	3.38204	0.000193512	-0.239792	0.999993
77979	chr13	21452750	21453649	TRUE	Stable	3.54838	3.63841e-06	3.11193	0.000396258	-0.0149683	0.999993
77997	chr13	21750600	21750999	TRUE	Stable	2.51224	0.00047318	2.72157	0.00137473	-0.204257	0.999993
77998	chr13	21752800	21753699	TRUE	Stable	2.86038	8.50264e-05	3.00977	0.000537878	0.176939	0.999993
78052	chr13	22049700	22050799	TRUE	Stable	2.9723	4.8988e-05	3.31258	0.000229728	-0.146544	0.999993
78053	chr13	22051300	22051649	TRUE	Stable	3.43003	5.98165e-06	2.01089	0.0154568	0.430428	0.999993
78088	chr13	23498200	23499299	TRUE	Stable	2.95829	5.23956e-05	1.94721	0.0189254	0.419813	0.999993
78106	chr13	23534700	23535249	TRUE	Stable	4.16435	3.18533e-07	2.51958	0.00276803	0.0210608	0.999993
78107	chr13	23535650	23536999	TRUE	Stable	3.2484	1.3158e-05	2.63262	0.00186394	-0.191879	0.999993
78111	chr13	23550900	23551549	TRUE	Stable	3.38782	7.16973e-06	2.1644	0.00935941	-0.0888391	0.999993
78116	chr13	23561000	23562349	TRUE	Stable	3.12684	2.32958e-05	2.79181	0.00108318	0.0150079	0.999993
78117	chr13	23562600	23563349	TRUE	Stable	2.64549	0.000244949	3.11127	0.00039693	0.281374	0.999993
78140	chr13	23738600	23738799	TRUE	Stable	1.85479	0.00919713	2.3348	0.00526616	-0.371811	0.999993
78141	chr13	23738950	23740849	TRUE	Stable	3.04194	3.49109e-05	3.10775	0.000401164	-0.0417804	0.999993
78149	chr13	23760350	23761049	TRUE	Stable	2.81548	0.000105778	2.6445	0.00178805	-0.0859439	0.999993
78150	chr13	23761600	23762299	TRUE	Stable	3.39125	7.06546e-06	2.98074	0.000587054	-0.239419	0.999993
78198	chr13	29982950	29984199	TRUE	Stable	2.98847	4.53209e-05	3.4597	0.000161921	0.156959	0.999993
78199	chr13	29984550	29984899	TRUE	Stable	2.68129	0.00020523	2.29909	0.00595459	-0.0249492	0.999993
78213	chr13	31620350	31620549	TRUE	Stable	2.77267	0.000130525	2.35302	0.00495006	0.874488	0.999993
78219	chr13	31806000	31807599	TRUE	Stable	3.46079	5.23989e-06	3.14335	0.000360757	0.287642	0.999993
78221	chr13	31811150	31811249	TRUE	Stable	2.3377	0.00109334	3.61666	0.000114615	0.539763	0.999993
78224	chr13	32801350	32801799	TRUE	Stable	3.0783	2.92733e-05	2.7663	0.00118054	-0.357528	0.999993
78225	chr13	32802000	32803549	TRUE	Stable	3.46116	5.23364e-06	3.19437	0.00031232	0.276752	0.999993
78250	chr13	34873600	34874299	TRUE	Stable	2.67108	0.000215934	3.09393	0.00041768	-0.0579335	0.999993
78251	chr13	34874550	34875399	TRUE	Stable	2.62314	0.00027332	2.69504	0.00150579	-0.0664678	0.999993
78257	chr13	35740550	35741149	TRUE	Stable	3.22614	1.45556e-05	3.37638	0.000195416	0.438104	0.999993
78258	chr13	35741550	35742949	TRUE	Stable	3.16338	1.95527e-05	3.05098	0.000473598	-0.0670236	0.999993
78263	chr13	36116500	36117349	TRUE	Stable	3.47425	4.95745e-06	2.60331	0.00206553	0.213628	0.999993
78264	chr13	36117700	36118749	TRUE	Stable	3.08165	2.88393e-05	2.06829	0.0128451	0.385777	0.999993
78276	chr13	36734700	36736849	TRUE	Stable	3.29313	1.07676e-05	2.92786	0.000692727	-0.0852304	0.999993
78283	chr13	37825100	37828399	TRUE	Stable	3.64108	2.50884e-06	3.4336	0.000170671	0.138738	0.999993
78287	chr13	37963700	37964049	TRUE	Stable	2.67471	0.000211931	3.05361	0.000469811	0.674298	0.999993
78291	chr13	38036400	38037199	TRUE	Stable	3.21512	1.53313e-05	2.89647	0.000768142	0.253149	0.999993
78292	chr13	38037250	38038249	TRUE	Stable	3.48007	4.83403e-06	2.77945	0.0011304	0.188325	0.999993
78301	chr13	38634200	38634999	TRUE	Stable	3.31805	9.73942e-06	3.17292	0.000332405	0.0470155	0.999993
78302	chr13	38635150	38635799	TRUE	Stable	2.30467	0.00127692	2.18637	0.00869425	-0.159242	0.999993
78304	chr13	38959650	38961049	TRUE	Stable	2.66928	0.00021792	2.55237	0.0024648	-0.148414	0.999993
78311	chr13	40287350	40287899	TRUE	Stable	2.70988	0.000177987	2.85963	0.000864231	-0.31093	0.999993
78321	chr13	40723250	40723699	TRUE	Stable	2.61684	0.000282024	2.6084	0.00202791	0.271914	0.999993
78330	chr13	40729700	40730299	TRUE	Stable	2.89247	7.24921e-05	3.34923	0.000209893	0.24496	0.999993
78331	chr13	40730400	40731049	TRUE	Stable	3.39526	6.95487e-06	2.72654	0.00135022	0.125373	0.999993
78332	chr13	40731150	40732699	TRUE	Stable	3.11104	2.51337e-05	2.58931	0.00216668	0.300245	0.999993
78361	chr13	42050400	42051549	TRUE	Stable	3.0937	2.72287e-05	3.9423	5.91491e-05	0.123171	0.999993
78362	chr13	42052000	42053799	TRUE	Stable	4.0981	4.25451e-07	2.7048	0.00145831	0.0408323	0.999993
78373	chr13	43302850	43304899	TRUE	Stable	3.9014	8.74632e-07	3.69919	9.85964e-05	0.130176	0.999993
78374	chr13	43365450	43366349	TRUE	Stable	2.53321	0.000426621	3.28081	0.000248616	-0.0353941	0.999993
78379	chr13	43481400	43481649	TRUE	Stable	1.60894	0.0236388	2.9498	0.000645753	0.474227	0.999993
78380	chr13	43481800	43482099	TRUE	Stable	2.53474	0.000423364	2.55621	0.00243428	0.175149	0.999993
78386	chr13	43615450	43616799	TRUE	Stable	3.74766	1.60953e-06	3.23453	0.000280766	0.0519898	0.999993
78391	chr13	44026650	44027049	TRUE	Stable	2.09349	0.00334764	2.56329	0.00237229	0.0109833	0.999993
78405	chr13	44729250	44730449	TRUE	Stable	4.07629	4.51798e-07	3.79686	8.08016e-05	0.172701	0.999993
78408	chr13	44840100	44840999	TRUE	Stable	3.00957	4.0728e-05	2.83377	0.000942523	0.00188538	0.999993
78409	chr13	45000900	45001999	TRUE	Stable	3.23248	1.41721e-05	2.96112	0.000623827	0.148993	0.999993
78410	chr13	45002200	45002699	TRUE	Stable	3.57794	3.21151e-06	2.49818	0.00298882	0.280764	0.999993
78423	chr13	45963350	45964999	TRUE	Stable	4.06649	4.64818e-07	3.25803	0.00026399	0.296771	0.999993
78427	chr13	46417900	46419549	TRUE	Stable	4.15265	3.35581e-07	3.60394	0.000117327	0.0707354	0.999993
78436	chr13	46728350	46728649	TRUE	Stable	3.06718	3.09092e-05	3.27722	0.000250698	-0.33007	0.999993
78438	chr13	46928650	46931149	TRUE	Stable	3.37897	7.46885e-06	3.05354	0.000469894	0.142192	0.999993
78453	chr13	48228050	48228349	TRUE	Stable	2.47927	0.000555779	2.30862	0.00576381	0.175724	0.999993
78486	chr13	49420350	49420999	TRUE	Stable	2.08813	0.0034292	2.58671	0.00218841	0.0718431	0.999993
78487	chr13	49421350	49422449	TRUE	Stable	2.73276	0.000159167	3.05799	0.000463527	0.00186277	0.999993
78507	chr13	51400600	51401049	TRUE	Stable	2.83941	9.40101e-05	3.74646	8.82781e-05	-0.734326	0.999993
78513	chr13	51644450	51644999	TRUE	Stable	3.13727	2.2181e-05	2.63946	0.00181977	-0.116267	0.999993
78522	chr13	51845550	51846399	TRUE	Stable	3.29629	1.06255e-05	2.99756	0.000558315	-0.0212877	0.999993
78523	chr13	51846450	51849199	TRUE	Stable	3.5551	3.53214e-06	3.26612	0.000258194	0.171307	0.999993
78533	chr13	52975500	52976549	TRUE	Stable	2.69776	0.000188935	3.13016	0.000374373	0.0694574	0.999993
78539	chr13	53182950	53183099	TRUE	Stable	1.92999	0.00675532	2.36017	0.00482725	-0.550215	0.999993
78542	chr13	53202250	53202599	TRUE	Stable	1.8164	0.0107277	3.16125	0.000341917	-0.701621	0.999993
78543	chr13	53204800	53205049	TRUE	Stable	2.06009	0.00387162	1.65456	0.0453567	0.513731	0.999993
78544	chr13	53205250	53205449	TRUE	Stable	1.86151	0.00895357	2.81328	0.0010104	-0.114729	0.999993
78545	chr13	53212250	53212749	TRUE	Stable	1.43418	0.0435459	3.15143	0.0003521	-0.396025	0.999993
78551	chr13	53284200	53286249	TRUE	Stable	3.13472	2.24564e-05	3.29652	0.000239565	0.104485	0.999993
78552	chr13	53309150	53309699	TRUE	Stable	2.1461	0.00264506	3.0604	0.000460467	0.267579	0.999993
78582	chr13	54302150	54303999	TRUE	Stable	3.50982	4.24705e-06	3.62128	0.000113882	0.110798	0.999993
78598	chr13	54692700	54693699	TRUE	Stable	2.77161	0.000131241	3.77368	8.35952e-05	0.116841	0.999993
78599	chr13	54694400	54694999	TRUE	Stable	2.66798	0.000219179	2.28728	0.00619712	-0.0106161	0.999993
78602	chr13	54749450	54750149	TRUE	Stable	4.17956	2.9891e-07	4.77765	5.79959e-06	0.233079	0.999993
78606	chr13	54837750	54838149	TRUE	Stable	2.34632	0.00104983	2.0743	0.0126006	0.335368	0.999993
78608	chr13	54948700	54950349	TRUE	Stable	4.13078	3.60466e-07	3.32964	0.000221295	0.129775	0.999993
78610	chr13	55099200	55100099	TRUE	Stable	3.59056	3.04344e-06	3.76661	8.54926e-05	0.096862	0.999993
78611	chr13	55100350	55100749	TRUE	Stable	2.62336	0.000273051	3.67371	0.000103404	-0.201772	0.999993
78618	chr13	55210000	55211549	TRUE	Stable	4.06826	4.64693e-07	3.32558	0.000222894	0.167392	0.999993
78619	chr13	55212050	55213949	TRUE	Stable	2.75368	0.000143276	3.01808	0.000523649	0.203991	0.999993
78625	chr13	55329850	55330999	TRUE	Stable	2.82666	0.000100079	3.41906	0.000177212	-0.0374928	0.999993
78634	chr13	55512000	55513449	TRUE	Stable	2.82987	9.85054e-05	2.50895	0.00287446	-0.0784672	0.999993
78636	chr13	55535650	55536349	TRUE	Stable	3.53777	3.79533e-06	3.09157	0.000419904	0.119197	0.999993
78637	chr13	55536800	55537149	TRUE	Stable	2.9822	4.67691e-05	2.64167	0.00180592	0.18772	0.999993
78644	chr13	55635300	55635999	TRUE	Stable	3.29746	1.05709e-05	2.79293	0.00107997	0.332441	0.999993
78649	chr13	55727550	55728199	TRUE	Stable	2.98539	4.60393e-05	2.68599	0.00155355	0.254819	0.999993
78656	chr13	56133950	56135999	TRUE	Stable	3.36405	8.04008e-06	2.71752	0.00139485	0.0987434	0.999993
78659	chr13	56220900	56222099	TRUE	Stable	2.9243	6.18555e-05	3.19217	0.000313999	0.111096	0.999993
78660	chr13	56222150	56222399	TRUE	Stable	2.81334	0.00010689	2.08295	0.0122473	0.92701	0.999993
78694	chr13	58273050	58275149	TRUE	Stable	3.84659	1.07422e-06	3.12159	0.000383971	0.196934	0.999993
78714	chr13	59556350	59557349	TRUE	Stable	3.56237	3.43496e-06	3.01701	0.000525201	0.255981	0.999993
78715	chr13	59557550	59557899	TRUE	Stable	2.52747	0.000438998	2.78706	0.0011016	0.157975	0.999993
78733	chr13	60057650	60057949	TRUE	Stable	2.72283	0.000166544	2.83409	0.000941369	-0.231294	0.999993
78747	chr13	60177800	60178749	TRUE	Stable	3.55514	3.53214e-06	2.64723	0.00177142	0.318391	0.999993
78779	chr13	63170600	63170799	TRUE	Stable	2.13154	0.00282241	3.31325	0.000229277	-0.333139	0.999993
78780	chr13	63171750	63171949	TRUE	Stable	1.57915	0.0263268	2.03243	0.0144276	-0.345091	0.999993
78792	chr13	63430650	63431149	TRUE	Stable	2.31546	0.00121337	3.3274	0.000221798	0.188074	0.999993
78793	chr13	63431500	63432249	TRUE	Stable	3.344	8.76275e-06	3.25613	0.000265163	0.262519	0.999993
78797	chr13	63562600	63563249	TRUE	Stable	2.7078	0.000179812	2.45996	0.00341557	0.520747	0.999993
78798	chr13	63563350	63567249	TRUE	Stable	3.64349	2.48296e-06	3.72232	9.3502e-05	-0.450288	0.999993
78799	chr13	63567500	63567749	TRUE	Stable	2.59618	0.000313365	2.63651	0.00183871	0.0678622	0.999993
78800	chr13	63568050	63568749	TRUE	Stable	2.88925	7.36243e-05	3.84626	7.249e-05	0.124246	0.999993
78801	chr13	63572100	63573449	TRUE	Stable	3.60793	2.83863e-06	2.858	0.000869246	0.239	0.999993
78804	chr13	63627500	63627649	TRUE	Stable	1.45358	0.0407807	2.12714	0.0105909	0.157614	0.999993
78805	chr13	63814600	63815199	TRUE	Stable	3.0166	3.93875e-05	2.07805	0.0124482	-0.0525414	0.999993
78806	chr13	63815450	63816099	TRUE	Stable	2.40485	0.000794755	2.78164	0.00112161	-0.00672914	0.999993
78807	chr13	63901100	63901999	TRUE	Stable	2.21477	0.00193801	2.99682	0.000559546	0.0956473	0.999993
78810	chr13	64151150	64153199	TRUE	Stable	3.59624	2.9721e-06	3.07833	0.000436917	0.180679	0.999993
78814	chr13	64273350	64274949	TRUE	Stable	3.46037	5.24795e-06	3.46268	0.00016141	0.151889	0.999993
78815	chr13	64275100	64275949	TRUE	Stable	3.83215	1.13894e-06	3.12881	0.000376072	0.138025	0.999993
78816	chr13	64311650	64312549	TRUE	Stable	3.13392	2.25463e-05	2.72101	0.00137758	0.151762	0.999993
78817	chr13	64312800	64313149	TRUE	Stable	2.71849	0.000170232	1.95512	0.0184644	0.135279	0.999993
78826	chr13	65240950	65241349	TRUE	Stable	2.58311	0.000333521	2.04346	0.0139311	0.0700152	0.999993
78827	chr13	65241450	65242049	TRUE	Stable	2.99019	4.49196e-05	1.96167	0.0180834	0.485164	0.999993
78833	chr13	66931800	66932799	TRUE	Stable	3.04466	3.4423e-05	3.37041	0.000199063	-0.256555	0.999993
78834	chr13	66933450	66934499	TRUE	Stable	3.59639	2.96974e-06	2.55044	0.00248294	0.238298	0.999993
78884	chr13	68581150	68581849	TRUE	Stable	3.22009	1.49667e-05	3.15256	0.000350849	0.159887	0.999993
78885	chr13	68582400	68583199	TRUE	Stable	3.42846	6.02738e-06	2.83716	0.000933596	0.256549	0.999993
78892	chr13	69534900	69535649	TRUE	Stable	3.63851	2.53375e-06	3.46009	0.000161769	0.0853451	0.999993
78895	chr13	69610450	69611449	TRUE	Stable	4.18019	2.9891e-07	3.21951	0.000291936	-0.0189398	0.999993
78896	chr13	69612200	69612999	TRUE	Stable	3.72839	1.73771e-06	3.15634	0.000346833	-0.0420265	0.999993
78899	chr13	70636350	70637499	TRUE	Stable	3.12882	2.30823e-05	3.40945	0.000182173	0.0376283	0.999993
78900	chr13	70638200	70638699	TRUE	Stable	2.17263	0.00234861	3.79805	8.05955e-05	-0.0431986	0.999993
78904	chr13	71962700	71964399	TRUE	Stable	3.76491	1.48797e-06	2.61566	0.00197699	0.166728	0.999993
78909	chr13	72628150	72629649	TRUE	Stable	3.81879	1.20106e-06	3.20806	0.000301818	0.152988	0.999993
78972	chr13	76097850	76098649	TRUE	Stable	2.71249	0.000175546	2.65574	0.00172116	-0.11631	0.999993
78973	chr13	76098850	76099749	TRUE	Stable	2.86387	8.35416e-05	2.87885	0.000810034	-0.190312	0.999993
78980	chr13	78162850	78164199	TRUE	Stable	3.66807	2.25471e-06	3.24743	0.000270386	-0.0910482	0.999993
78982	chr13	78181200	78182349	TRUE	Stable	2.89115	7.296e-05	2.69557	0.00150282	-0.191418	0.999993
78985	chr13	78196950	78198649	TRUE	Stable	3.63556	2.56153e-06	3.23465	0.000280669	0.0808909	0.999993
78986	chr13	78199250	78200349	TRUE	Stable	3.32276	9.59048e-06	2.95255	0.000639985	-0.0270287	0.999993
78997	chr13	80884800	80885449	TRUE	Stable	3.27999	1.13768e-05	2.12642	0.0106174	0.671987	0.999993
79005	chr13	81710000	81712299	TRUE	Stable	3.3598	8.19133e-06	3.33501	0.000218246	0.151425	0.999993
79007	chr13	81782700	81783099	TRUE	Stable	2.72263	0.000166727	2.54563	0.00252721	-0.126209	0.999993
79015	chr13	83730300	83731949	TRUE	Stable	3.72308	1.77725e-06	2.96955	0.000608028	0.132031	0.999993
79019	chr13	84221550	84221949	TRUE	Stable	2.69936	0.000187417	2.62838	0.00189169	0.488532	0.999993
79020	chr13	84222350	84223349	TRUE	Stable	3.47353	4.96749e-06	3.01043	0.000536769	0.206181	0.999993
79021	chr13	84347500	84348049	TRUE	Stable	3.3537	8.41604e-06	2.72539	0.00135576	0.464308	0.999993
79022	chr13	84348250	84349899	TRUE	Stable	3.56299	3.42531e-06	3.16161	0.00034186	-0.0225176	0.999993
79038	chr13	89738750	89743499	TRUE	Stable	3.26993	1.19173e-05	3.52449	0.000140568	-0.117315	0.999993
79043	chr13	90922400	90922749	TRUE	Stable	2.35963	0.000986291	3.31295	0.000229565	-0.310093	0.999993
79044	chr13	90923350	90923549	TRUE	Stable	2.07554	0.00361747	3.0579	0.000463616	-0.399673	0.999993
79047	chr13	91223250	91224449	TRUE	Stable	3.25988	1.24674e-05	2.60382	0.00206185	0.321312	0.999993
79048	chr13	91370400	91371849	TRUE	Stable	2.59544	0.0003145	2.53504	0.00262265	-0.164275	0.999993
79050	chr13	91460150	91460699	TRUE	Stable	2.73761	0.000155445	1.98649	0.0167048	-0.0017903	0.999993
79062	chr13	92529900	92530599	TRUE	Stable	2.70587	0.000181514	3.26587	0.000258223	-0.189949	0.999993
79063	chr13	92530950	92531749	TRUE	Stable	3.79686	1.32182e-06	2.5988	0.00209739	0.156272	0.999993
79072	chr13	93190750	93192299	TRUE	Stable	3.1315	2.28179e-05	2.91102	0.000733176	-0.014542	0.999993
79073	chr13	93192600	93192849	TRUE	Stable	1.8113	0.0109535	3.32889	0.000221295	-0.110188	0.999993
79077	chr13	93497450	93500199	TRUE	Stable	2.91972	6.33079e-05	2.70487	0.00145799	0.170083	0.999993
79079	chr13	93771300	93772649	TRUE	Stable	3.07368	2.99499e-05	3.39488	0.000188302	-0.113115	0.999993
79080	chr13	94057050	94059499	TRUE	Stable	3.29383	1.07437e-05	3.10648	0.000402625	0.237381	0.999993
79084	chr13	94284200	94285899	TRUE	Stable	3.61304	2.79493e-06	2.31274	0.00568373	0.307249	0.999993
79087	chr13	94357850	94358899	TRUE	Stable	3.68245	2.11903e-06	2.75822	0.00121163	0.270725	0.999993
79088	chr13	94359050	94359299	TRUE	Stable	2.42754	0.000712935	1.8258	0.0274785	0.66509	0.999993
79099	chr13	94882900	94883749	TRUE	Stable	3.5221	4.04913e-06	3.16888	0.000335847	0.17931	0.999993
79104	chr13	95324400	95325599	TRUE	Stable	3.30388	1.02932e-05	3.04207	0.000485895	0.295919	0.999993
79105	chr13	95325850	95326049	TRUE	Stable	2.36286	0.000971199	2.23926	0.00727802	-0.813484	0.999993
79106	chr13	95326250	95327699	TRUE	Stable	3.0897	2.77238e-05	3.30083	0.000236713	-0.0813995	0.999993
79112	chr13	95616600	95618799	TRUE	Stable	2.82375	0.000101591	2.7844	0.00111102	0.0973161	0.999993
79150	chr13	98205600	98206849	TRUE	Stable	3.34979	8.56887e-06	3.14068	0.000363641	0.302008	0.999993
79157	chr13	98354050	98356099	TRUE	Stable	3.34898	8.5901e-06	3.11573	0.000391775	0.343169	0.999993
79158	chr13	98365800	98366699	TRUE	Stable	3.0944	2.71301e-05	2.1375	0.0102309	0.274959	0.999993
79159	chr13	98390600	98391699	TRUE	Stable	3.70769	1.90129e-06	3.28059	0.000248764	-0.101126	0.999993
79161	chr13	98502550	98503599	TRUE	Stable	2.93481	5.86978e-05	2.14352	0.0100293	0.744467	0.999993
79162	chr13	98503900	98505549	TRUE	Stable	3.96331	6.80934e-07	3.05465	0.000468606	0.33018	0.999993
79164	chr13	98534200	98534449	TRUE	Stable	2.36379	0.000966969	1.86095	0.0247204	-0.607032	0.999993
79166	chr13	98572550	98573349	TRUE	Stable	2.87589	7.86771e-05	2.7965	0.00106789	0.222165	0.999993
79169	chr13	98813950	98814849	TRUE	Stable	2.58422	0.000331732	3.13609	0.000368283	0.21074	0.999993
79170	chr13	98815450	98816099	TRUE	Stable	2.34774	0.00104244	4.35088	1.73232e-05	-0.262105	0.999993
79183	chr13	99514600	99516949	TRUE	Stable	3.76361	1.49568e-06	3.638	0.000110909	0.193224	0.999993
79185	chr13	99780650	99780849	TRUE	Stable	1.55749	0.0284516	2.21757	0.00784026	0.17109	0.999993
79193	chr13	100124250	100124799	TRUE	Stable	4.21764	2.53563e-07	3.19007	0.000315979	0.0904906	0.999993
79194	chr13	100125050	100125999	TRUE	Stable	2.75612	0.000141609	3.60666	0.000116972	0.113759	0.999993
79199	chr13	100650250	100650899	TRUE	Stable	3.51081	4.23088e-06	2.30268	0.00588439	0.118784	0.999993
79212	chr13	101718950	101719149	TRUE	Stable	2.3377	0.00109334	2.16215	0.00942139	0.449241	0.999993
79218	chr13	101813400	101813699	TRUE	Stable	2.48414	0.000542504	1.66728	0.0437552	-0.120216	0.999993
79222	chr13	102625500	102625699	TRUE	Stable	1.83377	0.0100074	2.80717	0.0010302	-0.390705	0.999993
79233	chr13	103918350	103921049	TRUE	Stable	2.72336	0.000166175	3.54788	0.000132942	0.0755335	0.999993
79234	chr13	103921350	103922299	TRUE	Stable	2.93449	5.8791e-05	3.69058	0.000100798	0.168869	0.999993
79237	chr13	104176950	104178449	TRUE	Stable	3.12225	2.38171e-05	2.7226	0.00136996	0.0518138	0.999993
79238	chr13	104179000	104179799	TRUE	Stable	2.64267	0.000248604	3.00892	0.000539268	-0.0480045	0.999993
79272	chr13	107890700	107892249	TRUE	Stable	3.90277	8.67822e-07	3.42438	0.000174848	0.161157	0.999993
79283	chr13	108316500	108317249	TRUE	Stable	3.29693	1.06017e-05	2.86518	0.000848236	-0.0324671	0.999993
79294	chr13	109822450	109823149	TRUE	Stable	2.44356	0.000660722	2.90353	0.000749673	0.0418883	0.999993
79315	chr13	111806900	111808749	TRUE	Stable	2.95461	5.33246e-05	2.911	0.000733176	0.0050858	0.999993
79316	chr13	111809100	111810149	TRUE	Stable	3.34932	8.57884e-06	3.63643	0.000110909	0.0311467	0.999993
79330	chr13	112926050	112926999	TRUE	Stable	3.36261	8.07477e-06	3.11086	0.000397449	-0.125033	0.999993
79331	chr13	112927700	112928749	TRUE	Stable	3.4345	5.85978e-06	2.752	0.00123953	-0.00816588	0.999993
79332	chr13	112987250	112988549	TRUE	Stable	3.30775	1.01352e-05	3.2573	0.00026399	-0.045663	0.999993
79337	chr13	113031700	113032749	TRUE	Stable	2.84966	8.9528e-05	3.43142	0.000171691	-0.226338	0.999993
79344	chr13	113775500	113775649	TRUE	Stable	1.56046	0.0281483	1.67441	0.0428663	-0.00575657	0.999993
79352	chr13	114456950	114457549	TRUE	Stable	2.64169	0.00024975	2.18518	0.0087285	-0.120824	0.999993
79353	chr13	114458150	114458999	TRUE	Stable	3.57218	3.28731e-06	2.79879	0.00105985	0.0880536	0.999993
79367	chr13	116309050	116310449	TRUE	Stable	4.08789	4.36473e-07	3.40284	0.000184669	0.173363	0.999993
79377	chr13	117219950	117222549	TRUE	Stable	2.97442	4.85017e-05	3.35275	0.000208096	-0.0475526	0.999993
79386	chr13	118713150	118714499	TRUE	Stable	3.62407	2.67047e-06	3.21762	0.000293685	-0.0659053	0.999993
79387	chr13	118714600	118717399	TRUE	Stable	3.27223	1.1781e-05	3.5805	0.000123245	-0.0114031	0.999993
79394	chr13	119408100	119409799	TRUE	Stable	2.94321	5.64574e-05	2.6284	0.00189164	-0.0352464	0.999993
79407	chr13	119754950	119756399	TRUE	Stable	3.10991	2.52604e-05	3.15922	0.000343957	0.0746424	0.999993
79412	chr13	119965350	119966449	TRUE	Stable	2.80497	0.000111313	3.50484	0.000146229	-0.373018	0.999993
79486	chr14	8097800	8097999	TRUE	Stable	1.97467	0.00559799	2.83004	0.000954401	-0.0183395	0.999993
79487	chr14	8098200	8099249	TRUE	Stable	3.14539	2.1369e-05	2.51689	0.00279514	0.325786	0.999993
79513	chr14	14011800	14013049	TRUE	Stable	3.09138	2.75217e-05	2.79802	0.00106259	0.164237	0.999993
79533	chr14	16555400	16555699	TRUE	Stable	2.69393	0.000192716	2.15848	0.00953491	-0.453259	0.999993
79544	chr14	18237800	18238399	TRUE	Stable	3.02822	3.72966e-05	2.81073	0.00101881	0.186331	0.999993
79545	chr14	18238700	18239149	TRUE	Stable	2.67801	0.000208562	2.79095	0.00108659	0.0349043	0.999993
79546	chr14	18239500	18239899	TRUE	Stable	2.40526	0.000793273	2.22107	0.00774587	0.253384	0.999993
79547	chr14	18269450	18270249	TRUE	Stable	2.8028	0.000112484	3.35072	0.000209274	-0.0627783	0.999993
79550	chr14	18330350	18332199	TRUE	Stable	2.88606	7.47566e-05	3.62883	0.000112356	0.189367	0.999993
79555	chr14	19750050	19752749	TRUE	Stable	3.29927	1.04801e-05	2.93666	0.000674109	0.205469	0.999993
79560	chr14	19986750	19987549	TRUE	Stable	2.87444	7.9242e-05	2.26004	0.00678956	-0.0178919	0.999993
79573	chr14	20545350	20545999	TRUE	Stable	2.69425	0.000192433	2.20217	0.00825683	-0.00298833	0.999993
79579	chr14	20694900	20696549	TRUE	Stable	3.20544	1.6045e-05	3.45425	0.00016324	0.135856	0.999993
79580	chr14	20702000	20703099	TRUE	Stable	2.69048	0.000196078	2.87844	0.000810949	0.0693707	0.999993
79586	chr14	20733350	20734649	TRUE	Stable	3.25971	1.24762e-05	2.43493	0.0037209	0.153251	0.999993
79588	chr14	20792700	20793549	TRUE	Stable	2.87601	7.86433e-05	2.61741	0.00196528	0.0876441	0.999993
79589	chr14	20794250	20794949	TRUE	Stable	3.08542	2.83019e-05	2.39253	0.00431127	0.271659	0.999993
79593	chr14	21051450	21052149	TRUE	Stable	3.06583	3.11282e-05	3.09431	0.000417157	0.235001	0.999993
79594	chr14	21052650	21053599	TRUE	Stable	3.44737	5.54505e-06	3.09642	0.000414587	0.0372506	0.999993
79602	chr14	21442100	21442249	TRUE	Stable	1.84778	0.00946094	3.61465	0.000114968	0.0518485	0.999993
79603	chr14	21498500	21500299	TRUE	Stable	3.34209	8.83695e-06	3.21666	0.000294581	0.0822075	0.999993
79604	chr14	21501350	21501999	TRUE	Stable	2.99482	4.38614e-05	2.21272	0.00797085	0.168029	0.999993
79608	chr14	21830650	21831249	TRUE	Stable	2.77844	0.000126848	3.64646	0.000109802	0.145782	0.999993
79611	chr14	21847550	21848899	TRUE	Stable	3.58776	3.07401e-06	3.63427	0.000111276	0.146124	0.999993
79614	chr14	21904850	21905299	TRUE	Stable	2.27382	0.00147538	2.70814	0.00144132	0.169992	0.999993
79617	chr14	21984200	21986099	TRUE	Stable	2.81961	0.000103659	3.22214	0.000289488	0.0311231	0.999993
79618	chr14	21986200	21987749	TRUE	Stable	2.9576	5.2561e-05	3.35031	0.000209384	0.298493	0.999993
79619	chr14	21988100	21988399	TRUE	Stable	2.67335	0.00021339	2.5179	0.00278467	0.406753	0.999993
79620	chr14	21988600	21991799	TRUE	Stable	2.67066	0.00021641	3.48556	0.000152438	-0.234245	0.999993
79621	chr14	21993600	21994299	TRUE	Stable	2.80107	0.000113454	2.57233	0.00229996	-0.0744681	0.999993
79622	chr14	21994600	21995649	TRUE	Stable	3.10654	2.56452e-05	2.9311	0.00068571	-0.00237657	0.999993
79630	chr14	22213400	22213499	TRUE	Stable	1.82372	0.0104179	2.96017	0.000625692	-0.254743	0.999993
79651	chr14	24778950	24779699	TRUE	Stable	2.74321	0.000150969	3.13735	0.00036761	0.14253	0.999993
79658	chr14	25226150	25226749	TRUE	Stable	2.73566	0.000156911	2.49185	0.00305562	0.07416	0.999993
79660	chr14	25377750	25378849	TRUE	Stable	4.20445	2.71273e-07	2.50931	0.002872	0.0286726	0.999993
79663	chr14	25457050	25457549	TRUE	Stable	3.87954	9.52464e-07	2.78301	0.00111614	0.276899	0.999993
79664	chr14	25457800	25459149	TRUE	Stable	3.7622	1.50529e-06	3.46449	0.000160701	0.0730283	0.999993
79665	chr14	25459400	25459549	TRUE	Stable	2.31444	0.00121877	3.4848	0.000152767	-0.0127919	0.999993
79671	chr14	25606550	25609299	TRUE	Stable	3.18057	1.80601e-05	3.06373	0.000455449	0.170038	0.999993
79673	chr14	25749650	25749799	TRUE	Stable	1.67626	0.0184295	2.18679	0.00868149	0.542662	0.999993
79675	chr14	25767700	25769799	TRUE	Stable	3.36875	7.86195e-06	3.37304	0.000197625	0.217977	0.999993
79697	chr14	26667400	26669949	TRUE	Stable	3.25875	1.25347e-05	2.85361	0.000882549	0.0541632	0.999993
79698	chr14	26670000	26670649	TRUE	Stable	2.85674	8.65012e-05	2.58754	0.00218118	-0.152027	0.999993
79702	chr14	27039650	27040899	TRUE	Stable	2.96535	5.07017e-05	3.25149	0.000268204	-0.0287964	0.999993
79710	chr14	27065800	27066399	TRUE	Stable	2.58333	0.000333147	2.91527	0.000722341	0.148847	0.999993
79711	chr14	27066650	27067199	TRUE	Stable	3.01759	3.92098e-05	2.00629	0.0156882	0.152626	0.999993
79712	chr14	27067350	27067699	TRUE	Stable	3.08443	2.8455e-05	2.22792	0.00756476	-0.0805692	0.999993
79713	chr14	27068550	27068849	TRUE	Stable	3.05329	3.30463e-05	1.67944	0.042268	0.245213	0.999993
79714	chr14	27070000	27070099	TRUE	Stable	2.42588	0.000718564	3.08427	0.000428942	0.19018	0.999993
79715	chr14	27070250	27070499	TRUE	Stable	2.54309	0.00040643	2.29245	0.00608721	0.358827	0.999993
79724	chr14	27507850	27508399	TRUE	Stable	2.7657	0.000135319	3.16598	0.000338255	-0.0886944	0.999993
79725	chr14	27508550	27508999	TRUE	Stable	2.27549	0.00146487	2.19674	0.00840665	0.165766	0.999993
79731	chr14	28503850	28508599	TRUE	Stable	2.94743	5.52306e-05	2.92701	0.00069478	0.0697059	0.999993
79732	chr14	28508650	28512349	TRUE	Stable	3.33375	9.14951e-06	3.10148	0.000408945	-0.00904298	0.999993
79752	chr14	30714750	30715899	TRUE	Stable	3.37477	7.6241e-06	2.94628	0.000652786	0.250677	0.999993
79753	chr14	30716200	30717249	TRUE	Stable	3.19011	1.71945e-05	3.03392	0.000499621	0.170272	0.999993
79756	chr14	30950800	30951249	TRUE	Stable	2.72407	0.000165688	2.43801	0.00368453	-0.328019	0.999993
79757	chr14	30951450	30952199	TRUE	Stable	3.1651	1.94113e-05	3.15051	0.000353029	0.178827	0.999993
79759	chr14	31001550	31002549	TRUE	Stable	3.75479	1.55666e-06	2.67089	0.00163574	0.472407	0.999993
79760	chr14	31017700	31018849	TRUE	Stable	3.12716	2.32564e-05	3.12557	0.000379657	0.219791	0.999993
79765	chr14	31206250	31206649	TRUE	Stable	1.43235	0.0438217	3.01479	0.000529333	0.140167	0.999993
79766	chr14	31206750	31207199	TRUE	Stable	2.79338	0.000117809	2.2455	0.00713227	-0.0294557	0.999993
79767	chr14	31250600	31251299	TRUE	Stable	2.77851	0.000126824	2.57627	0.00226974	0.0248246	0.999993
79769	chr14	31269050	31270099	TRUE	Stable	2.97246	4.89448e-05	2.28007	0.00635193	0.207864	0.999993
79775	chr14	31434150	31435999	TRUE	Stable	3.31461	9.8608e-06	2.76073	0.00120125	0.0979651	0.999993
79782	chr14	31661550	31661949	TRUE	Stable	2.33159	0.00112468	2.26704	0.00663293	0.270689	0.999993
79789	chr14	32084400	32085399	TRUE	Stable	3.69388	2.01698e-06	3.27151	0.000254603	-0.0681858	0.999993
79790	chr14	32085750	32086749	TRUE	Stable	3.03099	3.68714e-05	2.37396	0.00460228	0.195898	0.999993
79818	chr14	34309900	34310299	TRUE	Stable	2.30467	0.00127692	3.20544	0.00030424	0.0382485	0.999993
79819	chr14	34310750	34311999	TRUE	Stable	3.01853	3.90685e-05	3.26606	0.000258194	0.155144	0.999993
79824	chr14	34502200	34502349	TRUE	Stable	2.38453	0.0008759	2.03095	0.0144861	0.217309	0.999993
79825	chr14	34502800	34503599	TRUE	Stable	2.49892	0.000504529	2.86255	0.000855603	0.303398	0.999993
79831	chr14	34674150	34675449	TRUE	Stable	3.11924	2.4181e-05	3.43527	0.000169854	-0.0432454	0.999993
79867	chr14	45387600	45389399	TRUE	Stable	2.8941	7.19272e-05	2.21884	0.00780648	0.0795943	0.999993
79883	chr14	46604600	46604999	TRUE	Stable	2.51174	0.000474341	1.99557	0.0162372	-0.153367	0.999993
79891	chr14	46881750	46882749	TRUE	Stable	3.72078	1.79789e-06	3.14569	0.00035798	-0.0161834	0.999993
79892	chr14	46882850	46885799	TRUE	Stable	3.89082	9.11076e-07	3.77397	8.35952e-05	0.160386	0.999993
79903	chr14	47298800	47300149	TRUE	Stable	3.85329	1.04268e-06	2.88275	0.000800837	0.154148	0.999993
79909	chr14	47567400	47568399	TRUE	Stable	3.66647	2.26856e-06	2.855	0.000878458	0.316393	0.999993
79910	chr14	47568650	47568899	TRUE	Stable	2.40593	0.000791199	3.18637	0.000319836	-0.197753	0.999993
79925	chr14	49065200	49066249	TRUE	Stable	3.15887	2.00101e-05	2.29453	0.00604783	0.400114	0.999993
79926	chr14	49066600	49067649	TRUE	Stable	3.43609	5.81877e-06	3.27127	0.000254708	-0.00823665	0.999993
79935	chr14	50061300	50062949	TRUE	Stable	3.22548	1.46008e-05	3.33184	0.000220019	0.188984	0.999993
79938	chr14	50808150	50808599	TRUE	Stable	3.81951	1.19937e-06	2.80893	0.00102478	0.0735066	0.999993
79963	chr14	51984100	51985949	TRUE	Stable	3.56152	3.44677e-06	3.53673	0.000136433	0.0152881	0.999993
79964	chr14	51986050	51986699	TRUE	Stable	2.72815	0.000162752	2.55457	0.00244811	0.260598	0.999993
79969	chr14	52019100	52021249	TRUE	Stable	3.30956	1.00487e-05	2.68201	0.00157473	0.188884	0.999993
79976	chr14	52195900	52197299	TRUE	Stable	2.72289	0.000166544	3.55823	0.000130051	-0.232637	0.999993
79977	chr14	52197500	52198399	TRUE	Stable	3.76276	1.50203e-06	2.91208	0.000730365	-0.0257525	0.999993
79993	chr14	54252700	54253799	TRUE	Stable	3.32753	9.406e-06	3.26334	0.000260395	0.0696094	0.999993
79994	chr14	54254200	54254749	TRUE	Stable	2.71092	0.000177036	2.33678	0.00523229	0.0209932	0.999993
80002	chr14	54426200	54426749	TRUE	Stable	2.9307	5.98096e-05	2.34422	0.00509965	0.151071	0.999993
80003	chr14	54427000	54427749	TRUE	Stable	3.07749	2.93991e-05	2.4901	0.00307283	-0.0517428	0.999993
80015	chr14	54553400	54554549	TRUE	Stable	3.43308	5.90342e-06	2.83758	0.000932165	0.247662	0.999993
80017	chr14	54574850	54578449	TRUE	Stable	3.30827	1.01107e-05	3.32825	0.000221398	0.0363716	0.999993
80026	chr14	54685400	54686249	TRUE	Stable	2.88495	7.51896e-05	3.23522	0.000280203	0.206523	0.999993
80041	chr14	54924850	54927549	TRUE	Stable	3.19917	1.65142e-05	3.07278	0.000444208	0.299119	0.999993
80047	chr14	55091200	55092349	TRUE	Stable	3.17057	1.89137e-05	3.05622	0.000466494	0.30287	0.999993
80048	chr14	55094500	55095799	TRUE	Stable	2.32595	0.00115542	3.0234	0.000516027	0.0660425	0.999993
80049	chr14	55105500	55106799	TRUE	Stable	3.4177	6.32009e-06	3.30073	0.000236713	0.158179	0.999993
80050	chr14	55114650	55115599	TRUE	Stable	3.10562	2.57442e-05	3.51501	0.000143332	0.0234856	0.999993
80056	chr14	55559100	55559899	TRUE	Stable	2.94484	5.60165e-05	2.80162	0.00104942	-0.191532	0.999993
80057	chr14	55559950	55560449	TRUE	Stable	2.64252	0.000248806	2.69255	0.00151857	0.136226	0.999993
80058	chr14	55560550	55561449	TRUE	Stable	2.9586	5.23809e-05	3.43773	0.000169208	0.100522	0.999993
80061	chr14	55590450	55591599	TRUE	Stable	3.26253	1.23181e-05	2.80767	0.00102857	0.107026	0.999993
80062	chr14	55591750	55592999	TRUE	Stable	2.71223	0.000175775	2.98652	0.000577978	-0.0125359	0.999993
80064	chr14	55642300	55643549	TRUE	Stable	3.09058	2.76141e-05	2.51881	0.0027756	0.258543	0.999993
80065	chr14	55643700	55644899	TRUE	Stable	2.70622	0.000181186	2.54646	0.0025191	0.0563155	0.999993
80067	chr14	55671000	55671799	TRUE	Stable	3.64908	2.42888e-06	2.93617	0.000675081	0.14759	0.999993
80068	chr14	55672250	55672999	TRUE	Stable	3.63387	2.5731e-06	2.76115	0.00119965	0.119811	0.999993
80083	chr14	55822750	55823599	TRUE	Stable	3.02979	3.70498e-05	2.34171	0.00514279	0.334931	0.999993
80084	chr14	55823700	55824649	TRUE	Stable	2.82096	0.000103027	3.55275	0.000131364	-0.176101	0.999993
80085	chr14	55824800	55825199	TRUE	Stable	4.04572	4.96684e-07	1.9713	0.0175327	0.552052	0.999993
80086	chr14	55825350	55825649	TRUE	Stable	2.69675	0.000189945	3.23795	0.000277921	0.295845	0.999993
80087	chr14	55825900	55827299	TRUE	Stable	3.07972	2.90977e-05	3.57428	0.000125192	0.0597524	0.999993
80089	chr14	55852500	55853099	TRUE	Stable	2.27446	0.00147108	2.52394	0.00272801	-0.420437	0.999993
80090	chr14	55853300	55853549	TRUE	Stable	2.55696	0.000379727	1.83707	0.0265682	-0.0791064	0.999993
80091	chr14	55853600	55856599	TRUE	Stable	3.30379	1.02982e-05	3.46782	0.000159757	0.0669482	0.999993
80107	chr14	56776450	56778249	TRUE	Stable	2.70968	0.000178192	3.25132	0.000268373	0.101616	0.999993
80108	chr14	56778750	56778999	TRUE	Stable	2.79224	0.000118481	2.04426	0.0138959	0.0784436	0.999993
80109	chr14	56810350	56811149	TRUE	Stable	3.15414	2.05027e-05	2.81333	0.0010104	0.373571	0.999993
80110	chr14	56812150	56813349	TRUE	Stable	3.02521	3.78702e-05	2.82675	0.000965396	0.272184	0.999993
80112	chr14	56885400	56886299	TRUE	Stable	3.75047	1.58546e-06	3.38164	0.000193683	0.19289	0.999993
80113	chr14	56887350	56888349	TRUE	Stable	3.28527	1.11353e-05	2.73328	0.00131994	0.112984	0.999993
80123	chr14	57571050	57571599	TRUE	Stable	2.25258	0.00162834	2.99373	0.000564964	-0.28975	0.999993
80124	chr14	57571800	57572199	TRUE	Stable	1.94567	0.0063203	2.67229	0.0016292	-0.437393	0.999993
80131	chr14	57825450	57826099	TRUE	Stable	2.58294	0.00033378	3.42778	0.000173229	-0.212851	0.999993
80132	chr14	57826350	57827399	TRUE	Stable	3.28715	1.104e-05	3.66349	0.000106364	0.0967282	0.999993
80137	chr14	58070250	58072799	TRUE	Stable	3.6299	2.61097e-06	3.7478	8.81403e-05	0.000586972	0.999993
80140	chr14	58073750	58076949	TRUE	Stable	3.99565	6.04624e-07	3.36204	0.000203775	0.146229	0.999993
80156	chr14	60250200	60251049	TRUE	Stable	3.03951	3.53411e-05	3.37934	0.000194503	-0.153581	0.999993
80157	chr14	60251700	60252699	TRUE	Stable	2.70675	0.000180751	3.58616	0.000122501	-0.06137	0.999993
80158	chr14	60265300	60266099	TRUE	Stable	3.51254	4.21295e-06	2.84755	0.00090131	-0.184605	0.999993
80171	chr14	61045150	61046999	TRUE	Stable	3.03349	3.64176e-05	3.14947	0.000353929	0.15031	0.999993
80180	chr14	61440350	61440599	TRUE	Stable	2.3695	0.00094159	2.41896	0.00393439	-0.0191027	0.999993
80183	chr14	61599650	61600349	TRUE	Stable	3.40411	6.69431e-06	2.46345	0.00337417	-0.123834	0.999993
80187	chr14	61649000	61649549	TRUE	Stable	2.86682	8.23209e-05	2.73249	0.00132362	-0.0353182	0.999993
80188	chr14	61680750	61683499	TRUE	Stable	3.85262	1.04268e-06	3.71413	9.59835e-05	0.183189	0.999993
80190	chr14	61686350	61686699	TRUE	Stable	2.08375	0.00349022	3.31048	0.000230321	0.18067	0.999993
80198	chr14	62292400	62293149	TRUE	Stable	2.83326	9.68565e-05	3.08002	0.000434639	0.0260319	0.999993
80199	chr14	62331400	62332299	TRUE	Stable	2.66313	0.000224647	3.22018	0.000291368	-0.093121	0.999993
80200	chr14	62332400	62333049	TRUE	Stable	2.85373	8.76764e-05	3.08022	0.000434477	0.0369865	0.999993
80205	chr14	62760450	62761049	TRUE	Stable	2.79219	0.000118508	4.28088	2.23594e-05	0.0302082	0.999993
80206	chr14	62761700	62762499	TRUE	Stable	3.31695	9.7768e-06	3.74137	8.97396e-05	0.163913	0.999993
80218	chr14	63244750	63245899	TRUE	Stable	2.55655	0.000380379	3.04755	0.000478529	-0.107413	0.999993
80219	chr14	63255700	63256299	TRUE	Stable	2.75927	0.000139554	2.17303	0.00909426	0.242834	0.999993
80221	chr14	63436050	63436799	TRUE	Stable	2.73837	0.000154849	2.73664	0.00130499	0.146409	0.999993
80232	chr14	64440000	64440549	TRUE	Stable	2.6037	0.000301484	2.39154	0.00432569	0.485068	0.999993
80233	chr14	64440850	64441549	TRUE	Stable	2.69843	0.000188266	2.97552	0.000596994	-0.0372488	0.999993
80237	chr14	64652150	64652399	TRUE	Stable	2.74447	0.000149961	1.74445	0.0350181	0.43473	0.999993
80238	chr14	64652500	64653599	TRUE	Stable	2.6734	0.000213353	3.1797	0.000325215	0.131655	0.999993
80241	chr14	65097150	65098049	TRUE	Stable	2.87297	7.98157e-05	2.74224	0.00128114	0.0037001	0.999993
80242	chr14	65098300	65098599	TRUE	Stable	2.26361	0.00154715	2.7516	0.00124054	0.190572	0.999993
80251	chr14	65342950	65343649	TRUE	Stable	2.79875	0.000114706	3.03768	0.0004929	0.20442	0.999993
80252	chr14	65344150	65344749	TRUE	Stable	2.63863	0.000253381	1.92883	0.0200429	0.152929	0.999993
80253	chr14	65357550	65358249	TRUE	Stable	1.92626	0.00686383	3.50384	0.000146384	-0.0242395	0.999993
80254	chr14	65358850	65359899	TRUE	Stable	3.41198	6.48272e-06	2.98429	0.000581094	0.300659	0.999993
80259	chr14	65805500	65807049	TRUE	Stable	2.95821	5.24127e-05	2.68547	0.00155625	0.0942097	0.999993
80271	chr14	66324900	66325549	TRUE	Stable	2.29058	0.00136469	2.18733	0.00866899	0.0158184	0.999993
80289	chr14	67233350	67234499	TRUE	Stable	3.25073	1.29995e-05	2.36823	0.00469383	0.240679	0.999993
80290	chr14	67234650	67235549	TRUE	Stable	2.32935	0.00113693	2.67179	0.00163135	-0.0546722	0.999993
80291	chr14	67236000	67236349	TRUE	Stable	2.28567	0.00139623	2.52415	0.00272617	-0.40248	0.999993
80296	chr14	67272050	67272449	TRUE	Stable	1.99381	0.0051565	3.17033	0.000334357	0.128956	0.999993
80302	chr14	67569000	67569199	TRUE	Stable	3.12274	2.37735e-05	1.75072	0.0343807	-0.0201356	0.999993
80307	chr14	67714000	67715249	TRUE	Stable	3.4489	5.5108e-06	3.08004	0.000434639	0.129747	0.999993
80336	chr14	69731450	69732499	TRUE	Stable	3.2808	1.13433e-05	2.40928	0.00406497	0.318491	0.999993
80337	chr14	69732750	69734049	TRUE	Stable	3.54688	3.66154e-06	3.45715	0.000163098	-0.143484	0.999993
80339	chr14	69804100	69805549	TRUE	Stable	3.45253	5.42817e-06	3.17932	0.000325654	0.189158	0.999993
80340	chr14	69805700	69805999	TRUE	Stable	3.26009	1.24581e-05	2.89326	0.000775733	-0.0883168	0.999993
80351	chr14	70152550	70153499	TRUE	Stable	2.96187	5.15611e-05	3.56733	0.000127872	0.319501	0.999993
80352	chr14	70154000	70154199	TRUE	Stable	1.39607	0.0493911	2.30138	0.00591014	0.0337084	0.999993
80355	chr14	70181000	70181099	TRUE	Stable	3.13786	2.21266e-05	2.16604	0.00930698	0.00166973	0.999993
80373	chr14	70545000	70546299	TRUE	Stable	2.59091	0.000321666	3.2205	0.000291193	0.0688751	0.999993
80377	chr14	70598650	70599649	TRUE	Stable	2.69431	0.000192398	3.08245	0.000431601	0.217814	0.999993
80378	chr14	70599750	70600349	TRUE	Stable	2.28771	0.00138338	2.89447	0.000772527	-0.193995	0.999993
80382	chr14	70635050	70636299	TRUE	Stable	2.96489	5.0785e-05	2.92674	0.000695414	0.149629	0.999993
80385	chr14	70765400	70766349	TRUE	Stable	2.85904	8.54967e-05	2.59098	0.00215583	0.0365292	0.999993
80386	chr14	70766800	70767899	TRUE	Stable	3.27236	1.17752e-05	3.07336	0.000443392	0.019576	0.999993
80397	chr14	73142350	73144349	TRUE	Stable	3.06474	3.1294e-05	3.35249	0.000208311	0.156875	0.999993
80402	chr14	73384350	73385099	TRUE	Stable	3.06897	3.06767e-05	2.67667	0.00160575	0.139135	0.999993
80403	chr14	73385400	73385699	TRUE	Stable	3.67391	2.20137e-06	2.6123	0.00200128	-0.0116648	0.999993
80407	chr14	73525350	73525649	TRUE	Stable	2.61967	0.00027808	3.17054	0.000334144	0.0318232	0.999993
80416	chr14	75130150	75130399	TRUE	Stable	2.39081	0.000849933	2.56923	0.00232389	0.404272	0.999993
80417	chr14	75130500	75130949	TRUE	Stable	3.60823	2.83863e-06	4.56824	9.11113e-06	0.197552	0.999993
80418	chr14	75131150	75131549	TRUE	Stable	1.55985	0.0282116	2.8903	0.000783128	-0.421714	0.999993
80435	chr14	76009600	76010799	TRUE	Stable	2.90459	6.8222e-05	2.79568	0.00107086	-0.116966	0.999993
80436	chr14	76011100	76011299	TRUE	Stable	2.67892	0.000207674	2.24718	0.00709026	-0.196343	0.999993
80439	chr14	76109900	76110799	TRUE	Stable	3.62348	2.67666e-06	2.8557	0.000876534	0.159145	0.999993
80440	chr14	76111100	76112099	TRUE	Stable	3.47403	4.96058e-06	2.67893	0.00159208	0.134079	0.999993
80444	chr14	76413650	76414499	TRUE	Stable	3.30147	1.03789e-05	3.17992	0.000325126	0.192939	0.999993
80445	chr14	76414850	76414999	TRUE	Stable	1.90175	0.00758589	2.28135	0.00632501	0.468975	0.999993
80448	chr14	76503350	76504349	TRUE	Stable	2.36489	0.000962444	3.40167	0.000185122	-0.0615164	0.999993
80449	chr14	76504600	76505949	TRUE	Stable	3.27976	1.13865e-05	2.62692	0.00190118	-0.0104259	0.999993
80450	chr14	76506100	76507099	TRUE	Stable	3.1703	1.89353e-05	2.59279	0.00214244	0.149475	0.999993
80465	chr14	77874150	77874849	TRUE	Stable	2.38485	0.00087472	3.93536	5.99725e-05	-0.0182133	0.999993
80468	chr14	78535300	78536799	TRUE	Stable	2.75409	0.000143034	2.83948	0.000926788	0.170329	0.999993
80469	chr14	78537150	78537449	TRUE	Stable	2.9692	4.96967e-05	1.89162	0.0224651	0.191891	0.999993
80470	chr14	78724500	78726099	TRUE	Stable	4.14037	3.49755e-07	3.08777	0.000425145	0.107995	0.999993
80474	chr14	79389400	79390749	TRUE	Stable	3.24693	1.32515e-05	2.94802	0.000649147	0.119496	0.999993
80480	chr14	79479750	79480799	TRUE	Stable	3.16202	1.96914e-05	3.14152	0.000362933	-0.0450008	0.999993
80481	chr14	79481900	79483349	TRUE	Stable	2.94948	5.46165e-05	3.73915	9.0238e-05	-0.0705322	0.999993
80510	chr14	93889550	93891849	TRUE	Stable	3.21251	1.54949e-05	2.9823	0.000584721	-0.0245902	0.999993
80529	chr14	99044600	99045899	TRUE	Stable	3.14167	2.17307e-05	2.82611	0.000966969	0.198661	0.999993
80530	chr14	99046600	99047649	TRUE	Stable	3.17898	1.81858e-05	2.63958	0.00181887	0.363458	0.999993
80539	chr14	100285100	100287149	TRUE	Stable	3.50613	4.30471e-06	3.54681	0.000133371	0.0626817	0.999993
80543	chr14	100459550	100459749	TRUE	Stable	2.29351	0.00134633	1.91384	0.0209935	-0.557414	0.999993
80544	chr14	100459800	100459999	TRUE	Stable	2.98179	4.68415e-05	2.76118	0.00119955	-0.309397	0.999993
80553	chr14	101654200	101654999	TRUE	Stable	3.19384	1.69154e-05	3.32	0.000225664	0.131177	0.999993
80557	chr14	102980700	102982699	TRUE	Stable	3.44971	5.49167e-06	3.00811	0.000540755	0.128745	0.999993
80558	chr14	102982800	102983499	TRUE	Stable	3.63523	2.56352e-06	3.79996	8.04202e-05	0.180959	0.999993
80566	chr14	103345450	103346899	TRUE	Stable	3.31282	9.94191e-06	2.99434	0.000564126	0.0869469	0.999993
80567	chr14	103347000	103347449	TRUE	Stable	2.61267	0.000288149	3.14497	0.000358921	0.169422	0.999993
80577	chr14	104459700	104460299	TRUE	Stable	2.73566	0.000156911	2.28965	0.00614617	0.27636	0.999993
80578	chr14	104460700	104461199	TRUE	Stable	2.5896	0.000323431	2.67369	0.00162179	0.240263	0.999993
80584	chr14	104521850	104523149	TRUE	Stable	2.46734	0.000588832	2.9928	0.00056679	0.059966	0.999993
80592	chr14	105572500	105572699	TRUE	Stable	1.8588	0.00904946	3.05478	0.000468433	-0.347406	0.999993
80597	chr14	105732550	105733599	TRUE	Stable	2.92855	6.05083e-05	2.26423	0.00669627	0.136092	0.999993
80600	chr14	105896300	105896899	TRUE	Stable	2.63553	0.000257213	2.13311	0.0103825	-0.0544477	0.999993
80601	chr14	105897300	105897499	TRUE	Stable	1.53879	0.0303871	3.79436	8.09446e-05	-0.127855	0.999993
80603	chr14	105897900	105899399	TRUE	Stable	3.18813	1.73767e-05	3.39494	0.000188302	0.104215	0.999993
80605	chr14	106365100	106365549	TRUE	Stable	1.90027	0.0076329	2.57889	0.00224755	0.0231054	0.999993
80625	chr14	115039900	115040749	TRUE	Stable	3.066	3.11061e-05	3.07533	0.0004414	0.207289	0.999993
80626	chr14	115042500	115043999	TRUE	Stable	2.65918	0.000228892	2.47859	0.0031985	0.16924	0.999993
80647	chr14	118363650	118363849	TRUE	Stable	2.14676	0.00263809	2.01304	0.0153524	-0.273427	0.999993
80659	chr14	118924300	118925399	TRUE	Stable	2.97268	4.88935e-05	3.33202	0.000219992	-0.100707	0.999993
80660	chr14	118925500	118925899	TRUE	Stable	3.18364	1.7767e-05	2.56536	0.00235463	0.942623	0.999993
80665	chr14	119098500	119100099	TRUE	Stable	3.19058	1.71709e-05	2.96505	0.000616065	0.23632	0.999993
80676	chr14	120476800	120477599	TRUE	Stable	3.37886	7.47202e-06	2.59898	0.00209603	0.266649	0.999993
80683	chr14	121035900	121038749	TRUE	Stable	3.00361	4.19286e-05	2.74146	0.00128386	-0.00153609	0.999993
80685	chr14	121108250	121108849	TRUE	Stable	2.80435	0.000111679	1.77554	0.0319464	0.00617113	0.999993
80690	chr14	121797100	121798649	TRUE	Stable	3.85587	1.0379e-06	2.65508	0.00172516	0.250303	0.999993
80691	chr14	121798700	121799049	TRUE	Stable	3.08307	2.8629e-05	1.77654	0.0318508	-0.210592	0.999993
80716	chr14	122462900	122465749	TRUE	Stable	3.13624	2.22888e-05	3.13792	0.000366807	0.0515232	0.999993
80721	chr14	122473700	122474149	TRUE	Stable	2.69199	0.000194561	2.50719	0.00289342	0.0185407	0.999993
80722	chr14	122474300	122474699	TRUE	Stable	4.56448	5.49415e-08	3.06202	0.000458228	0.839151	0.999993
80723	chr14	122474750	122475349	TRUE	Stable	2.5246	0.000445105	2.5126	0.00283806	0.0174197	0.999993
80750	chr15	3996200	3996749	TRUE	Stable	3.38073	7.39643e-06	3.82199	7.64564e-05	0.201968	0.999993
80759	chr15	5144000	5145049	TRUE	Stable	2.87564	7.8785e-05	3.37927	0.000194515	0.254703	0.999993
80760	chr15	5184900	5186649	TRUE	Stable	2.99801	4.31961e-05	3.13745	0.000367544	0.0570998	0.999993
80768	chr15	6707200	6707999	TRUE	Stable	2.50245	0.000495957	3.6807	0.000102336	-0.294857	0.999993
80771	chr15	6709000	6709799	TRUE	Stable	3.33901	8.9542e-06	2.42525	0.00384987	0.125457	0.999993
80785	chr15	8098250	8098849	TRUE	Stable	3.13661	2.22461e-05	4.24894	2.44936e-05	0.0876814	0.999993
80788	chr15	8168350	8168999	TRUE	Stable	2.25348	0.00162175	2.83526	0.000939245	0.176545	0.999993
80789	chr15	8169100	8169949	TRUE	Stable	3.36197	8.10609e-06	4.18845	2.97885e-05	-0.00422081	0.999993
[truncated: 26,753 more rows]

## Sheet: HH dependent
Peak_ID	Chromosome	Start	End	Gli3_binding	Type	WTinput_FC	WTinput_adjPval	SHHnullinput_FC	SHHnullinput_adjPval	WTSHHnull_FC	WTSHHnull_adjPval
[truncated: 11 more rows]

[truncated: 1 more sheets: Other]
