# Supplementary material for: GLI transcriptional repression regulates tissue-specific enhancer activity in response to Hedgehog signaling
Source: eLife. 2020 Jan 28;9:e50670. doi: 10.7554/eLife.50670 (PMC6986877; doi:10.7554/eLife.50670)
Supplement: Figure 3—source data 1. — Coordinates for all ATAC peaks in the WT group that overlap with GBRs are listed. ‘Shh_ATAC_peak’ identifies the corresponding id# for that peak in the Shh-/- data, and if a peak is not present in the Shh-/- samples, it is marked as NA. A column for each GBR type identifies which GBR type a given ATAC peak overlaps with. The number indicates the peak ID. If a peak region does not overlap with the type of peak in that list, it will be marked as NA. The normalized log2 transformed signals are shown for each sample in addition to the ‘average’ signal across all samples. The ‘t’ statistic calculates the difference in signals between WT and Shh-/- by taking into consideration fold-change and variance among samples. A positive t statistic values indicate a peak is more accessible in WT than Shh-/- and a negative t statistic indicates higher accessibility in Shh-/-. The ‘p.value’ is obtained from a moderated t-test using limma. The ‘p.value.adj’ is the adjusted p-value (FDR) using the Benjamini-Hochberg procedure. [file elife-50670-fig3-data1.xlsx]

## Sheet: ATAC_supp
chr	start	end	SHH_peak_ATAC	stable_GBR	HH-sensitive	HH-dependent	Shh_null_rep1	Shh_null_rep1	WT_rep1	WT_rep2	Average	t	p.value	p.value.adj
chr1	4571399	4572221	2	1	NA	NA	4.76584	3.58087	5.0306	4.19204	4.39234	0.61916	0.535828	0.999748
chr1	4857376	4858251	5	2	NA	NA	5.44057	4.71733	5.60779	4.58721	5.08822	0.02623	0.979077	0.999748
chr1	9699802	9700834	15	3	NA	NA	6.24553	4.28967	6.03981	4.80101	5.344	0.21602	0.828973	0.999748
chr1	10993475	10993745	NA	4	NA	NA	2.97516	2.129	3.62646	2.45405	2.79617	0.69013	0.490126	0.999748
chr1	10993980	10994306	NA	4	NA	NA	3.37284	2.78759	3.01683	1.54586	2.68078	-1.12937	0.25877	0.999748
chr1	13372145	13374578	29	5	NA	NA	6.6558	5.6417	6.97559	6.37349	6.41164	0.74331	0.457311	0.999748
chr1	13589216	13589464	30	6	NA	NA	3.99772	1.81992	3.3866	2.6134	2.95441	0.1289	0.897437	0.999748
chr1	13589715	13590231	30	6	NA	NA	4.98064	2.78759	4.44683	3.64602	3.96527	0.22946	0.818519	0.999748
chr1	14184809	14185062	32	8	NA	NA	3.75264	3.36162	3.17628	2.07027	3.0902	-1.32019	0.186801	0.999748
chr1	16104118	16106141	41	11	NA	NA	6.10874	5.08313	6.30437	5.47623	5.74312	0.41615	0.67731	0.999748
chr1	16248855	16249523	43	12	NA	NA	5.00887	4.5714	5.24367	4.28968	4.77841	-0.03316	0.973544	0.999748
chr1	16618746	16619697	45	13	NA	NA	5.377	3.85764	5.34787	4.54828	4.7827	0.46759	0.640091	0.999748
chr1	24195100	24196661	67	14	NA	NA	5.33302	5.187	5.62171	4.7332	5.21873	-0.11671	0.907095	0.999748
chr1	30873062	30874007	74	15	NA	NA	5.2168	3.58087	5.2072	4.38113	4.5965	0.55888	0.576255	0.999748
chr1	31149624	31150152	NA	16	NA	NA	3.45722	3.58087	3.8792	2.07027	3.24689	-0.7695	0.441617	0.999748
chr1	33719730	33720088	NA	17	NA	NA	3.28322	1.42604	3.62646	2.88739	2.80578	1.27558	0.202133	0.999748
chr1	34842588	34843370	88	18	NA	NA	5.11658	3.4754	4.59534	3.78645	4.24344	-0.14857	0.881893	0.999748
chr1	36368928	36369282	97	19	NA	NA	4.51337	2.38341	3.8792	3.57032	3.58657	0.3907	0.696029	0.999748
chr1	36511524	36512673	100	20	NA	NA	5.73908	3.67915	6.07059	4.95776	5.11164	1.13812	0.255097	0.999748
chr1	36555794	36559107	103	22	NA	NA	6.6558	5.88762	7.07001	6.17057	6.446	0.49278	0.622176	0.999748
chr1	36588460	36589061	104	23	NA	NA	3.99772	4.28967	4.56684	3.316	4.04256	-0.28596	0.774915	0.999748
chr1	36691236	36691779	106	24	NA	NA	4.10623	3.10297	4.67763	3.85185	3.93467	0.93324	0.350718	0.999748
chr1	36709481	36710197	107	25	NA	NA	5.06373	4.40904	5.66269	4.58721	4.93067	0.54932	0.582801	0.999748
chr1	37429809	37430587	113	28	NA	NA	4.89247	3.4754	5.0306	3.85185	4.31258	0.36373	0.716066	0.999748
chr1	37864536	37865625	115	29	NA	NA	6.94595	6.11534	7.187	5.88834	6.53416	0.00994	0.992072	0.999748
chr1	37996931	37998413	117	30	NA	NA	6.19727	5.4601	6.37184	5.51712	5.88658	0.16369	0.869975	0.999748
chr1	38129289	38130477	118	31	NA	NA	5.59753	3.85764	5.41337	4.66205	4.88265	0.43842	0.661088	0.999748
chr1	38631407	38632210	122	34	NA	NA	4.10623	4.22607	4.82932	4.24169	4.35083	0.52216	0.601571	0.999748
chr1	39535426	39536233	127	36	NA	NA	5.65225	4.01647	5.27925	4.69807	4.91151	0.21813	0.827333	0.999748
chr1	39576710	39577551	128	37	NA	NA	4.6981	3.4754	4.85312	4.14063	4.29181	0.5798	0.562066	0.999748
chr1	39900418	39901473	129	38	NA	NA	4.92246	3.77115	4.80512	4.24169	4.43511	0.24966	0.802856	0.999748
chr1	42952603	42953315	142	39	NA	NA	4.6981	2.78759	4.34978	3.316	3.78787	0.1273	0.898706	0.999748
chr1	43098310	43099241	145	40	NA	NA	5.67004	3.77115	5.77909	4.69807	4.97959	0.73227	0.464021	0.999748
chr1	43445216	43446638	147	41	NA	NA	5.72213	4.6217	5.95437	5.20305	5.37531	0.57508	0.565249	0.999748
chr1	43827040	43828207	148	42	NA	NA	5.7724	4.93186	6.07059	5.12583	5.47517	0.34788	0.727936	0.999748
chr1	44102145	44103113	150	43	NA	NA	5.24081	4.01647	5.53608	3.97438	4.69193	0.17896	0.85797	0.999748
chr1	44147283	44148247	153	44	NA	NA	5.00887	4.67031	5.27925	4.7332	4.92291	0.23557	0.813769	0.999748
chr1	44551488	44552447	154	45	NA	NA	4.73237	3.93924	5.50636	5.01599	4.79849	1.3082	0.190835	0.999748
chr1	46066658	46067235	162	48	NA	NA	4.43231	2.95388	4.56684	4.42477	4.09445	1.1348	0.256488	0.999748
chr1	46853210	46854193	164	49	NA	NA	6.34854	5.66587	6.41245	5.29997	5.93171	-0.21346	0.830974	0.999748
chr1	51650386	51650947	169	50	NA	NA	4.51337	4.35059	5.16978	3.71794	4.43792	0.01679	0.986604	0.999748
chr1	51914966	51916012	170	51	NA	NA	5.03656	4.01647	5.29671	4.66205	4.75295	0.64022	0.522044	0.999748
chr1	52113556	52114006	171	52	NA	NA	4.20715	3.36162	4.56684	3.22019	3.83895	0.15428	0.877395	0.999748
chr1	52578537	52578748	NA	53	NA	NA	2.97516	1.42604	2.83754	1.83176	2.26762	0.18952	0.849692	0.999748
chr1	54907108	54907536	191	54	NA	NA	4.053	3.77115	3.8792	1.83176	3.38378	-1.49372	0.135282	0.999748
chr1	55087337	55088657	196	56	NA	NA	6.68234	5.71303	7.28213	5.87267	6.38754	0.53681	0.591414	0.999748
chr1	55130906	55131740	197	57	NA	NA	5.70497	3.36162	5.46062	4.66205	4.79731	0.74649	0.455388	0.999748
chr1	55236987	55238224	198	58	NA	NA	4.86184	3.4754	5.27925	4.42477	4.51031	0.96611	0.334012	0.999748
chr1	56972043	56973787	202	59	NA	NA	5.19239	5.187	5.90967	5.17776	5.3667	0.50048	0.616748	0.999748
chr1	57096703	57097241	NA	60	NA	NA	3.61248	2.59961	4.13359	2.88739	3.30827	0.57177	0.567491	0.999748
chr1	57406217	57406861	204	61	NA	NA	4.51337	3.77115	4.34978	3.91442	4.13718	-0.01437	0.988536	0.999748
chr1	58392539	58393476	209	62	NA	NA	5.48144	4.46522	5.76661	4.38113	5.0236	0.14214	0.886976	0.999748
chr1	58973080	58974140	215	63	NA	NA	6.12172	4.6217	6.12048	5.20305	5.51674	0.41004	0.681783	0.999748
chr1	59119786	59120462	216	64	NA	NA	4.92246	3.58087	5.26157	4.66205	4.60674	1.00394	0.315432	0.999748
chr1	59270085	59270602	218	65	NA	NA	4.25508	4.807	4.13359	3.57032	4.1915	-0.96003	0.337062	0.999748
chr1	59322309	59322659	219	66	NA	NA	3.61248	3.23808	3.57013	2.27488	3.17389	-0.71077	0.477242	0.999748
chr1	59481311	59482973	220	67	NA	NA	6.44468	6.24935	6.52045	5.67	6.22112	-0.35595	0.721882	0.999748
chr1	59762830	59764184	226	69	NA	NA	5.83681	3.77115	6.10073	4.7332	5.11047	0.86658	0.386195	0.999748
chr1	59912480	59913931	227	70	NA	NA	5.63424	4.08977	6.18754	5.47623	5.34694	1.37112	0.170368	0.999748
chr1	60097672	60098647	229	71	NA	NA	5.2168	4.46522	5.60779	4.7332	5.00575	0.46579	0.641375	0.999748
chr1	60409214	60410164	232	72	NA	NA	5.7724	4.01647	5.70254	4.66205	5.03837	0.40696	0.68405	0.999748
chr1	61407295	61407663	NA	74	NA	NA	3.68426	3.10297	3.78335	3.316	3.47164	0.22063	0.825387	0.999748
chr1	62647848	62648670	240	77	NA	NA	4.95184	4.28967	4.50808	3.97438	4.43099	-0.53654	0.591597	0.999748
chr1	62766885	62767187	243	78	NA	NA	3.88038	3.58087	3.92483	2.75689	3.53574	-0.55101	0.581641	0.999748
chr1	63247125	63247413	248	79	NA	NA	3.75264	3.36162	3.8792	2.07027	3.26593	-0.82333	0.410338	0.999748
chr1	64616769	64617882	252	81	NA	NA	5.16756	4.08977	5.72851	4.50828	4.87353	0.69233	0.488745	0.999748
chr1	65178168	65179938	257	82	NA	NA	5.92835	5.25231	6.20614	5.27634	5.66579	0.21335	0.83106	0.999748
chr1	66816582	66818035	264	83	NA	NA	6.042	4.46522	6.03981	4.98717	5.38355	0.36739	0.713334	0.999748
chr1	71652759	71653737	274	84	NA	NA	5.59753	5.00948	5.93219	4.89709	5.35907	0.15711	0.875161	0.999748
chr1	72243532	72244959	280	85	NA	NA	6.30366	5.68964	6.99176	5.63328	6.15458	0.44654	0.655216	0.999748
chr1	72254667	72256041	281	86	NA	NA	6.08241	5.56665	6.79075	5.67	6.02745	0.57375	0.566151	0.999748
chr1	72307122	72307762	283	87	NA	NA	4.51337	4.35059	4.4152	3.64602	4.2313	-0.56743	0.570437	0.999748
chr1	73363336	73364177	289	89	NA	NA	4.98064	4.807	4.78051	3.91442	4.62064	-0.77239	0.439901	0.999748
chr1	74040891	74041403	NA	90	NA	NA	3.28322	2.95388	3.83207	2.75689	3.20651	0.24871	0.80359	0.999748
chr1	74041692	74042086	297	90	NA	NA	3.81792	4.15953	4.09419	3.40585	3.86937	-0.33746	0.735777	0.999748
chr1	74386556	74387278	303	92	NA	NA	5.55986	4.40904	5.18861	4.24169	4.8498	-0.38071	0.703423	0.999748
chr1	74391243	74391717	304	93	NA	NA	4.76584	3.85764	4.70404	3.64602	4.24339	-0.19327	0.84675	0.999748
chr1	74392017	74392542	304	93	NA	NA	4.20715	3.58087	4.47778	3.78645	4.01306	0.33661	0.736418	0.999748
chr1	74505426	74506931	306	94	NA	NA	6.93128	6.1839	7.33379	5.91918	6.59204	0.09741	0.922406	0.999748
chr1	74587549	74588612	307	95	NA	NA	6.39206	6.13278	6.58583	5.39079	6.12537	-0.38751	0.698383	0.999748
chr1	75124631	75125268	314	96	NA	NA	5.24081	4.35059	5.41337	4.08731	4.77302	-0.06412	0.948873	0.999748
chr1	75398900	75399501	NA	97	NA	NA	3.94024	2.95388	4.31593	3.316	3.63151	0.52152	0.602014	0.999748
chr1	75399751	75400111	NA	97	NA	NA	2.72586	2.129	3.73292	3.316	2.97595	1.55088	0.120961	0.999748
chr1	75521453	75521947	333	98	NA	NA	5.00887	4.22607	4.4152	3.49042	4.28514	-0.93963	0.347431	0.999748
chr1	76009536	76010150	338	100	NA	NA	4.47341	3.67915	4.78051	3.49042	4.10587	0.08368	0.933316	0.999748
chr1	77514705	77516470	345	101	NA	NA	5.67004	4.67031	5.70254	5.09914	5.28551	0.3261	0.744359	0.999748
chr1	78189878	78190102	NA	102	NA	NA	3.18766	1.81992	3.24985	2.75689	2.75358	0.70626	0.480045	0.999748
chr1	78488521	78489716	349	103	NA	NA	5.28765	4.22607	5.0306	4.42477	4.74227	-0.04124	0.967102	0.999748
chr1	79183747	79184147	NA	104	NA	NA	3.37284	3.4754	3.73292	2.6134	3.29864	-0.35479	0.722758	0.999748
chr1	82283040	82283650	361	106	NA	NA	4.86184	3.36162	4.82932	4.03195	4.27118	0.45085	0.652111	0.999748
chr1	82290000	82291892	363	107	NA	NA	5.91349	5.22002	6.20614	5.51712	5.71419	0.41687	0.676785	0.999748
chr1	82839094	82839939	369	108	NA	NA	4.6981	2.95388	4.96658	4.14063	4.1898	1.02863	0.303679	0.999748
chr1	84187001	84187294	370	109	NA	NA	3.88038	3.58087	3.45041	2.27488	3.29663	-1.22707	0.219827	0.999748
chr1	84549413	84550282	372	110	NA	NA	6.042	5.7587	5.6761	4.69807	5.54372	-1.00835	0.313311	0.999748
chr1	84839092	84840575	374	111	NA	NA	5.80497	5.1532	6.13025	5.25232	5.58518	0.29999	0.764189	0.999748
chr1	85894310	85895832	380	112	NA	NA	5.26442	4.67031	5.60779	4.83375	5.09406	0.35824	0.720172	0.999748
chr1	86064303	86065052	384	113	NA	NA	5.00887	4.40904	5.00957	4.54828	4.74394	0.09892	0.921206	0.999748
chr1	86441739	86443163	390	114	NA	NA	5.78877	4.84984	5.76661	5.01599	5.3553	0.10177	0.918938	0.999748
chr1	86502911	86504820	392	115	NA	NA	6.44468	5.5921	6.90333	6.32825	6.31709	0.84455	0.398385	0.999748
chr1	86524444	86528504	394	117	NA	NA	7.90297	7.24786	8.09739	6.78696	7.50879	-0.18836	0.850596	0.999748
chr1	86703636	86704149	398	118	NA	NA	4.47341	3.36162	4.31593	4.03195	4.04573	0.36251	0.716978	0.999748
chr1	87213675	87214379	402	119	NA	NA	5.28765	3.77115	4.98823	4.58721	4.65856	0.36519	0.714976	0.999748
chr1	88008050	88008478	407	120	NA	NA	3.81792	3.4754	3.73292	3.00706	3.50833	-0.39113	0.695709	0.999748
chr1	89069499	89071001	421	121	NA	NA	6.31501	5.3148	6.62092	5.90385	6.03864	0.6326	0.527008	0.999748
chr1	89454379	89455037	424	122	NA	NA	4.95184	2.95388	4.80512	4.24169	4.23813	0.80658	0.419927	0.999748
chr1	90119160	90119846	430	123	NA	NA	4.55226	5.04677	4.87654	2.88739	4.34074	-1.29715	0.19461	0.999748
chr1	90334905	90335136	NA	124	NA	NA	3.18766	3.36162	3.24985	2.75689	3.139	-0.3835	0.701359	0.999748
chr1	90338557	90338818	NA	125	NA	NA	2.72586	2.129	3.17628	2.6134	2.66113	0.66078	0.50877	0.999748
chr1	91249734	91250580	438	126	NA	NA	5.70497	5.37468	5.89827	5.17776	5.53892	-0.00256	0.997956	0.999748
chr1	91398524	91399056	441	127	NA	NA	4.73237	3.23808	4.20931	3.57032	3.93752	-0.13488	0.892709	0.999748
chr1	91412313	91414632	442	128	NA	NA	6.50539	5.56665	6.80302	5.94938	6.20611	0.48092	0.630586	0.999748
chr1	91731158	91732256	447	129	NA	NA	4.30147	3.36162	4.96658	3.91442	4.13602	0.86088	0.389325	0.999748
chr1	91770063	91770953	448	130	NA	NA	4.73237	3.36162	5.33101	4.14063	4.39141	0.9738	0.330178	0.999748
chr1	91844541	91845039	450	131	NA	NA	4.79856	3.58087	4.13359	3.49042	4.00086	-0.53396	0.593381	0.999748
chr1	92179563	92181163	453	132	NA	NA	7.28299	6.06169	7.16815	6.19598	6.6772	0.01375	0.989028	0.999748
chr1	92371716	92372120	454	133	NA	NA	4.25508	3.10297	3.68067	3.00706	3.51145	-0.47382	0.635641	0.999748
chr1	92397441	92398740	456	134	NA	NA	5.0904	4.40904	5.13137	4.38113	4.75298	0.00923	0.992637	0.999748
chr1	92790992	92791919	461	135	NA	NA	5.16756	5.187	5.47603	4.7332	5.14095	-0.10273	0.918181	0.999748
chr1	92831134	92833067	462	136	NA	NA	6.14735	5.04677	6.1687	5.27634	5.65979	0.17736	0.859229	0.999748
chr1	92934265	92935109	466	137	NA	NA	5.86797	4.76286	5.6761	5.39079	5.42443	0.30822	0.75792	0.999748
chr1	93176499	93177424	471	138	NA	NA	5.70497	5.08313	5.5213	5.09914	5.35213	-0.11851	0.905663	0.999748
chr1	93220836	93221119	NA	139	NA	NA	3.68426	2.78759	3.57013	3.11755	3.28988	0.15256	0.878745	0.999748
chr1	93342552	93344037	475	141	NA	NA	6.15999	5.68964	6.70179	5.74077	6.07305	0.41911	0.675142	0.999748
chr1	93444910	93446108	476	142	NA	NA	5.33302	4.71733	5.60779	4.69807	5.08905	0.1806	0.856682	0.999748
chr1	93477984	93479351	477	143	NA	NA	7.33966	6.31196	7.64117	6.20852	6.87533	0.14001	0.888656	0.999748
chr1	93511516	93512545	478	144	NA	NA	5.94305	5.00948	6.15918	5.04424	5.53899	0.17734	0.859242	0.999748
chr1	93635165	93636303	481	145	NA	NA	5.78877	4.97119	6.07059	4.86576	5.42408	0.12468	0.900778	0.999748
chr1	93753949	93755356	483	146	NA	NA	5.67004	3.85764	5.56519	5.09914	5.048	0.80344	0.421739	0.999748
chr1	105989815	105990816	499	147	NA	NA	6.00042	4.28967	6.10073	5.15203	5.38571	0.68046	0.496228	0.999748
chr1	106713729	106714827	503	148	NA	NA	4.55226	3.23808	5.0919	4.7332	4.40386	1.43828	0.150387	0.999748
chr1	106758929	106760327	504	149	NA	NA	5.97202	4.807	6.08071	5.45534	5.57877	0.5351	0.592592	0.999748
chr1	106796280	106796827	505	150	NA	NA	4.39	2.78759	4.62329	4.08731	3.97205	1.08362	0.278561	0.999748
chr1	111699298	111699764	NA	151	NA	NA	3.75264	3.36162	4.13359	2.45405	3.42547	-0.37224	0.709723	0.999748
chr1	118310901	118311553	507	152	NA	NA	4.6981	3.77115	4.98823	4.08731	4.3862	0.42856	0.668253	0.999748
chr1	118388613	118390229	508	153	NA	NA	5.86797	5.40372	5.81589	5.07195	5.53988	-0.27133	0.786142	0.999748
chr1	118825525	118826148	512	154	NA	NA	4.053	4.08977	4.92226	4.28968	4.33868	0.75575	0.449816	0.999748
chr1	118982460	118983609	515	155	NA	NA	5.03656	4.22607	5.0919	4.42477	4.69482	0.17957	0.857495	0.999748
chr1	119052646	119054539	517	156	NA	NA	6.13459	5.51436	6.0294	5.57637	5.81368	-0.03052	0.975649	0.999748
chr1	119648403	119649101	524	157	NA	NA	5.1423	3.4754	5.26157	4.33613	4.55385	0.69272	0.488502	0.999748
chr1	120761180	120761626	535	158	NA	NA	4.053	3.85764	3.78335	2.88739	3.64534	-0.87643	0.380817	0.999748
chr1	121327502	121328260	536	159	NA	NA	4.89247	4.08977	5.1507	4.33613	4.61727	0.35667	0.721343	0.999748
chr1	125434550	125436181	542	160	NA	NA	6.67355	5.7587	6.76589	5.70582	6.22599	0.02789	0.977747	0.999748
chr1	125560232	125561642	544	161	NA	NA	6.75914	5.34505	7.1634	6.1316	6.3498	0.84172	0.399962	0.999748
chr1	127204727	127206372	550	162	NA	NA	5.88331	5.08313	5.68938	5.41263	5.51711	0.09583	0.923656	0.999748
chr1	127537309	127537687	NA	164	NA	NA	3.28322	2.95388	3.57013	3.78645	3.39842	0.79131	0.428783	0.999748
chr1	130715533	130717814	565	165	NA	NA	5.73908	4.97119	6.09075	4.86576	5.4167	0.17406	0.861822	0.999748
chr1	131096631	131098034	570	166	NA	NA	5.35518	3.58087	5.82795	4.58721	4.8378	1.04552	0.29581	0.999748
chr1	131827575	131828824	576	167	NA	NA	5.78877	4.67031	5.82795	4.69807	5.24627	0.04731	0.962266	0.999748
chr1	132477019	132477460	587	168	NA	NA	4.92246	3.85764	4.24573	4.24169	4.31688	-0.20688	0.836106	0.999748
chr1	133025097	133025745	593	169	NA	NA	4.86184	3.58087	4.59534	3.64602	4.17102	-0.14232	0.886828	0.999748
chr1	133130813	133131860	596	170	NA	NA	5.91349	5.51436	5.76661	5.25232	5.61169	-0.28904	0.772553	0.999748
chr1	133609920	133610798	607	171	NA	NA	5.24081	4.15953	5.24367	4.50828	4.78807	0.24854	0.803722	0.999748
chr1	134060876	134061427	611	173	NA	NA	4.98064	4.22607	5.22555	4.50828	4.73513	0.3726	0.709456	0.999748
chr1	134361668	134362356	618	174	NA	NA	4.62702	3.23808	4.98823	3.57032	4.10591	0.49017	0.624027	0.999748
chr1	134405946	134406308	619	175	NA	NA	3.75264	3.10297	3.51151	3.40585	3.44324	0.04365	0.965182	0.999748
chr1	134414902	134415882	620	176	NA	NA	5.70497	4.67031	5.87521	4.86576	5.27906	0.25849	0.796033	0.999748
chr1	134493996	134495225	622	177	NA	NA	5.00887	4.35059	5.6761	4.38113	4.85417	0.49322	0.62187	0.999748
chr1	135374394	135375495	635	178	NA	NA	4.79856	3.4754	5.00957	4.19204	4.36889	0.65572	0.512021	0.999748
chr1	135578959	135579456	638	179	NA	NA	4.15758	3.77115	3.78335	2.88739	3.64987	-0.88922	0.373908	0.999748
chr1	136233944	136234685	649	180	NA	NA	4.98064	4.71733	5.6761	4.14063	4.87867	0.08395	0.933101	0.999748
chr1	136345806	136346711	651	181	NA	NA	5.11658	4.01647	5.2072	4.42477	4.69125	0.35267	0.724346	0.999748
chr1	136624381	136625401	655	182	NA	NA	5.616	4.28967	5.62171	4.19204	4.92986	-0.06498	0.948193	0.999748
chr1	137900358	137900675	NA	186	NA	NA	2.97516	2.129	3.31984	2.45405	2.71951	0.4734	0.635938	0.999748
chr1	138247596	138248033	NA	189	NA	NA	3.28322	3.4754	3.78335	2.27488	3.20421	-0.49508	0.620558	0.999748
chr1	138344941	138345284	660	190	NA	NA	3.94024	4.15953	4.012	2.88739	3.74979	-0.8485	0.396182	0.999748
chr1	138385190	138385769	661	191	NA	NA	4.92246	4.5714	5.38099	4.19204	4.76672	0.05596	0.955375	0.999748
chr1	138837757	138838619	665	192	NA	NA	4.79856	4.6217	4.72998	3.78645	4.48417	-0.63887	0.522921	0.999748
chr1	138856572	138856867	669	193	NA	NA	3.37284	1.81992	3.78335	3.49042	3.11663	1.47097	0.141331	0.999748
chr1	138962969	138963868	671	194	NA	NA	4.86184	3.4754	4.89958	3.57032	4.20178	0.09377	0.925294	0.999748
chr1	139092634	139093035	672	195	NA	NA	3.53694	4.28967	3.68067	3.00706	3.62859	-0.80502	0.420827	0.999748
chr1	139194063	139194610	673	196	NA	NA	3.88038	3.93924	4.17195	3.22019	3.80294	-0.30216	0.762533	0.999748
chr1	139421899	139422558	676	198	NA	NA	5.06373	3.10297	4.98823	4.66205	4.45425	1.04868	0.294351	0.999748
chr1	143702170	143703178	679	200	NA	NA	5.616	3.67915	5.31396	4.42477	4.75847	0.31355	0.753869	0.999748
chr1	150681937	150682385	687	201	NA	NA	3.99772	3.58087	3.62646	3.11755	3.58065	-0.58992	0.555257	0.999748
chr1	150993020	150993909	689	203	NA	NA	4.6981	3.4754	5.0306	4.14063	4.33618	0.70524	0.480675	0.999748
chr1	151428017	151429114	692	204	NA	NA	6.31501	5.56665	6.32154	5.70582	5.97726	0.10299	0.917975	0.999748
chr1	151500177	151501266	693	205	NA	NA	5.59753	3.23808	5.72851	4.80101	4.84128	1.19734	0.231202	0.999748
chr1	151754889	151755809	694	206	NA	NA	6.45498	5.54074	6.58583	5.87267	6.11356	0.32712	0.743583	0.999748
chr1	152090004	152090772	695	207	NA	NA	4.79856	3.4754	4.92226	4.89709	4.52333	1.09236	0.2747	0.999748
chr1	152624696	152625468	699	208	NA	NA	4.92246	4.08977	5.16978	4.50828	4.67257	0.47064	0.637907	0.999748
chr1	153331964	153333544	705	209	NA	NA	6.10874	5.3148	6.76589	5.32321	5.87816	0.47046	0.638036	0.999748
chr1	153487212	153487838	707	210	NA	NA	4.59013	2.95388	4.50808	3.40585	3.86448	0.26148	0.793726	0.999748
chr1	153899481	153900694	710	212	NA	NA	6.19727	5.54074	6.66864	5.65176	6.0146	0.41166	0.680597	0.999748
chr1	155082995	155084086	713	213	NA	NA	5.86797	4.67031	5.95437	5.43414	5.4817	0.60098	0.547865	0.999748
chr1	156558383	156559476	733	214	NA	NA	5.1423	3.93924	5.44504	4.46713	4.74843	0.58713	0.557127	0.999748
chr1	156718261	156719501	735	215	NA	NA	5.67004	4.35059	5.82795	5.15203	5.25015	0.67811	0.497715	0.999748
chr1	156938737	156940024	739	218	NA	NA	5.48144	3.77115	5.26157	5.01599	4.88254	0.7245	0.468776	0.999748
chr1	157411793	157413094	740	220	NA	NA	5.82098	4.6217	5.59373	5.07195	5.27709	0.15763	0.874755	0.999748
chr1	159231823	159232492	744	221	NA	NA	5.39851	4.15953	5.44504	4.19204	4.79878	0.05588	0.955442	0.999748
chr1	160212504	160213416	749	222	NA	NA	6.10874	5.90804	6.56436	5.20305	5.94605	-0.17626	0.86009	0.999748
chr1	160792015	160793383	752	223	NA	NA	5.44057	4.15953	5.68938	5.29997	5.14736	0.982	0.326125	0.999748
chr1	161034326	161035568	754	224	NA	NA	6.50539	5.1532	6.7969	5.68802	6.03588	0.5841	0.559167	0.999748
chr1	161984208	161984559	760	225	NA	NA	4.89247	4.67031	3.62646	2.88739	4.01916	-2.15514	0.0311746	0.999748
chr1	162074879	162075243	764	228	NA	NA	4.15758	3.93924	3.3866	3.64602	3.78236	-0.75223	0.45193	0.999748
chr1	162217356	162218003	766	230	NA	NA	5.00887	4.89143	5.05132	4.46713	4.85469	-0.26991	0.787232	0.999748
chr1	162570228	162571167	769	232	NA	NA	5.86797	4.76286	5.75402	4.83375	5.30465	-0.03044	0.975714	0.999748
chr1	163308711	163309153	773	234	NA	NA	3.75264	2.78759	4.13359	2.75689	3.35768	0.24758	0.804467	0.999748
chr1	163313308	163313925	774	236	NA	NA	3.99772	4.35059	4.44683	3.97438	4.19238	0.05153	0.958906	0.999748
chr1	163314496	163315214	775	237	NA	NA	5.86797	5.80297	5.31396	4.08731	5.26805	-1.60432	0.108675	0.999748
chr1	163357965	163358358	777	238	NA	NA	3.81792	4.28967	4.012	2.45405	3.64341	-1.16034	0.24594	0.999748
chr1	163403585	163404001	780	239	NA	NA	4.73237	4.08977	4.59534	3.64602	4.26587	-0.41053	0.681428	0.999748
chr1	163461137	163461728	781	240	NA	NA	4.47341	4.67031	4.13359	2.6134	3.97268	-1.69413	0.0902712	0.999748
chr1	163779427	163780045	784	241	NA	NA	5.19239	4.89143	5.53608	4.54828	5.04205	0.00038	0.999697	0.999748
chr1	165459355	165461801	799	243	NA	NA	7.28875	6.69921	7.82992	6.78696	7.15121	0.44455	0.656655	0.999748
chr1	166002339	166003578	810	244	NA	NA	7.03101	5.71303	6.88035	5.7234	6.33695	-0.09916	0.921009	0.999748
chr1	166048760	166049767	811	245	NA	NA	4.95184	4.76286	5.18861	4.33613	4.80986	-0.13427	0.893188	0.999748
chr1	166282588	166282947	NA	247	NA	NA	3.45722	3.10297	3.83207	3.316	3.42706	0.41555	0.67775	0.999748
chr1	167283792	167285318	818	249	NA	NA	5.55986	4.28967	5.85177	5.39079	5.27302	0.98466	0.324813	0.999748
chr1	167349781	167350513	821	250	NA	NA	5.54065	4.01647	5.87521	4.66205	5.0236	0.69282	0.488441	0.999748
chr1	167393600	167394453	824	251	NA	NA	5.39851	4.93186	5.2072	4.38113	4.97968	-0.52451	0.599935	0.999748
chr1	168392257	168392698	836	253	NA	NA	4.55226	3.85764	3.8792	3.71794	4.00176	-0.57451	0.565638	0.999748
chr1	168431918	168432839	838	254	NA	NA	6.44468	6.47132	6.68862	5.45534	6.26499	-0.54572	0.585274	0.999748
chr1	168754286	168754616	839	255	NA	NA	3.94024	3.4754	3.62646	3.22019	3.56557	-0.4022	0.687549	0.999748
chr1	169238457	169238948	841	256	NA	NA	3.61248	4.28967	3.73292	3.64602	3.82027	-0.36983	0.711515	0.999748
chr1	170110548	170111195	846	257	NA	NA	4.43231	4.01647	4.59534	3.85185	4.22399	-0.00112	0.999107	0.999748
chr1	171150340	171151079	860	259	NA	NA	4.83054	3.93924	4.92226	4.03195	4.431	0.13036	0.896281	0.999748
chr1	171246849	171247613	865	260	NA	NA	5.0904	4.08977	5.62171	4.86576	4.91691	0.92407	0.35547	0.999748
chr1	171328562	171329976	872	261	NA	NA	6.20949	4.5714	6.56436	5.41263	5.68947	0.84546	0.397872	0.999748
chr1	171501569	171504192	878	262	NA	NA	6.49545	6.31196	6.93155	6.1577	6.47416	0.19922	0.842095	0.999748
chr1	172147875	172148874	902	263	NA	NA	4.98064	4.15953	5.56519	4.42477	4.78253	0.60068	0.548068	0.999748
chr1	172303079	172303365	NA	264	NA	NA	3.61248	2.59961	3.3866	2.27488	2.96839	-0.3892	0.69714	0.999748
chr1	172632410	172633472	917	265	NA	NA	6.31501	5.28389	6.55714	5.77489	5.98273	0.51821	0.604321	0.999748
chr1	176813381	176815095	927	266	NA	NA	6.88633	6.21699	7.38367	6.31671	6.70093	0.42203	0.673009	0.999748
chr1	177258060	177259165	930	267	NA	NA	5.72213	4.35059	5.49128	5.12583	5.17246	0.3848	0.700396	0.999748
chr1	177518092	177519326	933	268	NA	NA	4.59013	4.807	4.82932	4.33613	4.64065	-0.16376	0.869923	0.999748
chr1	177795953	177796884	935	269	NA	NA	5.89848	5.00948	6.5055	5.39079	5.70106	0.69861	0.484812	0.999748
chr1	178318171	178319506	939	270	NA	NA	6.56365	5.66587	6.94822	5.49682	6.16864	0.15234	0.87892	0.999748
chr1	178405597	178406788	942	272	NA	NA	5.46115	5.1532	6.00836	5.15203	5.44368	0.38597	0.699527	0.999748
chr1	178527913	178530389	946	273	NA	NA	6.08241	5.25231	5.94332	5.29997	5.6445	-0.06463	0.948469	0.999748
chr1	179060472	179061095	NA	277	NA	NA	3.28322	3.58087	4.05368	3.57032	3.62202	0.53714	0.591181	0.999748
chr1	179198001	179199189	956	278	NA	NA	5.00887	5.25231	5.2072	4.50828	4.99416	-0.38573	0.699702	0.999748
chr1	179474018	179474332	NA	280	NA	NA	3.53694	3.77115	3.62646	2.6134	3.38699	-0.75508	0.450218	0.999748
chr1	181211675	181212539	989	282	NA	NA	5.19239	3.67915	5.07175	3.85185	4.44879	0.0368	0.970642	0.999748
chr1	182018922	182019548	NA	283	NA	NA	3.45722	2.78759	4.13359	3.316	3.4236	0.8516	0.394454	0.999748
chr1	182019771	182020427	993	283	NA	NA	4.76584	2.59961	4.56684	3.91442	3.96168	0.78871	0.430301	0.999748
chr1	182124425	182125360	996	284	NA	NA	5.06373	3.58087	5.6355	4.38113	4.66531	0.96983	0.332157	0.999748
chr1	183101978	183102346	NA	285	NA	NA	3.08532	3.36162	3.78335	2.75689	3.24679	0.06595	0.947418	0.999748
chr1	183147514	183147867	1006	286	NA	NA	5.03656	4.28967	4.13359	3.316	4.19396	-1.32651	0.184702	0.999748
chr1	183189025	183189879	1008	287	NA	NA	5.33302	5.51436	4.98823	4.50828	5.08597	-0.95486	0.33967	0.999748
chr1	183296567	183298421	1009	288	NA	NA	6.18495	4.93186	6.31298	5.55689	5.74667	0.5323	0.594532	0.999748
chr1	185362688	185363740	1024	290	NA	NA	5.91349	4.6217	5.57953	4.86576	5.24512	-0.06354	0.949334	0.999748
chr1	185730941	185731520	1027	292	NA	NA	5.39851	5.1532	4.75547	3.22019	4.63184	-1.82089	0.0686539	0.999748
chr1	187674578	187674956	1035	293	NA	NA	3.99772	3.36162	3.45041	1.54586	3.0889	-1.67034	0.0948838	0.999748
chr1	187676754	187677001	1036	294	NA	NA	3.75264	3.85764	3.57013	2.45405	3.40861	-1.12114	0.262255	0.999748
chr1	189007419	189007926	1043	295	NA	NA	4.34642	1.81992	4.47778	3.64602	3.57253	1.38364	0.1665	0.999748
chr1	189727398	189728786	1046	296	NA	NA	5.46115	4.89143	5.87521	5.27634	5.37603	0.56476	0.572253	0.999748
chr1	190928245	190929443	1052	297	NA	NA	5.46115	4.35059	5.55071	4.46713	4.95739	0.14568	0.884179	0.999748
chr1	191395809	191396168	NA	298	NA	NA	2.58294	2.129	3.51151	3.22019	2.86091	1.42767	0.153417	0.999748
chr1	191396326	191398068	1062	299	NA	NA	7.03788	5.94801	7.3631	6.28154	6.65763	0.46564	0.641481	0.999748
chr1	191575037	191576429	1063	300	NA	NA	6.89392	5.187	6.72777	5.63328	6.11049	0.19801	0.843041	0.999748
chr1	191717766	191719519	1064	301	NA	NA	5.28765	3.67915	5.31396	4.66205	4.7357	0.71337	0.475632	0.999748
chr1	191821031	191821987	1065	302	NA	NA	5.48144	4.6217	5.95437	4.7675	5.20625	0.43735	0.661869	0.999748
chr1	192136388	192138626	1070	303	NA	20	6.17253	4.35059	6.38822	5.65176	5.64077	1.07219	0.283659	0.999748
chr1	192647439	192647834	NA	304	NA	NA	3.45722	3.4754	4.012	2.45405	3.34967	-0.32981	0.741554	0.999748
chr1	192796170	192796727	1074	306	NA	NA	4.98064	4.40904	4.85312	3.00706	4.31247	-1.08113	0.279664	0.999748
chr1	192798927	192800130	1075	307	NA	NA	5.7724	5.86692	5.44504	4.69807	5.44561	-1.05761	0.290261	0.999748
chr1	192822609	192823926	1076	309	NA	NA	4.55226	4.89143	5.26157	4.46713	4.7931	0.20146	0.840346	0.999748
chr1	192834610	192835845	1077	310	NA	NA	5.377	4.46522	5.55071	4.80101	5.04848	0.36013	0.718756	0.999748
chr1	192855619	192856136	1078	311	NA	NA	5.24081	4.28967	4.31593	4.14063	4.49676	-0.75911	0.447806	0.999748
chr1	193129864	193130616	1082	312	NA	NA	4.10623	3.58087	4.62329	4.03195	4.08559	0.68434	0.493779	0.999748
chr1	193173109	193173929	1084	313	NA	NA	5.00887	5.11859	5.44504	4.69807	5.06764	0.01106	0.991177	0.999748
chr10	4432119	4433109	1112	314	NA	NA	5.68761	4.84984	5.90967	4.7332	5.29508	0.07452	0.940602	0.999748
chr10	5804929	5806409	1116	315	NA	NA	6.87103	5.84592	7.23761	6.00794	6.49062	0.37364	0.708679	0.999748
chr10	5823419	5825049	1117	316	NA	NA	6.97487	6.13278	7.47087	6.20852	6.69676	0.40413	0.686124	0.999748
chr10	7210898	7212619	1119	317	NA	NA	5.68761	4.807	6.03981	5.45534	5.49744	0.70723	0.479442	0.999748
chr10	7662773	7664058	1129	318	NA	NA	5.26442	4.28967	5.5213	4.28968	4.84127	0.18158	0.855914	0.999748
chr10	7792606	7792995	1133	319	NA	NA	3.99772	2.78759	3.96907	2.6134	3.34195	-0.14338	0.885994	0.999748
chr10	7955841	7956876	1135	321	NA	NA	5.82098	4.01647	5.60779	4.92774	5.09324	0.49344	0.621712	0.999748
chr10	8518349	8519417	1136	322	NA	NA	5.33302	4.46522	5.6761	4.62512	5.02486	0.35553	0.722199	0.999748
chr10	8885621	8886852	1141	323	NA	NA	5.75584	5.187	5.80372	5.01599	5.44064	-0.08703	0.930648	0.999748
chr10	9900400	9900925	1145	324	NA	NA	4.25508	1.81992	4.24573	3.57032	3.47276	1.23067	0.218477	0.999748
chr10	9901247	9902174	1145	324	NA	NA	5.16756	3.67915	5.07175	4.19204	4.52763	0.29482	0.768136	0.999748
chr10	11280151	11281602	1148	326	NA	NA	5.95761	4.89143	6.52786	5.47623	5.71328	0.81645	0.414265	0.999748
chr10	14705093	14705864	1166	327	NA	NA	4.79856	4.15953	4.82932	4.19204	4.49486	0.04473	0.964322	0.999748
chr10	17074606	17075026	1168	328	NA	NA	4.86184	4.01647	4.20931	2.75689	3.96113	-1.35158	0.176541	0.999748
chr10	17721855	17723776	1171	333	NA	NA	6.37046	5.4601	6.24264	5.59559	5.9172	0.00542	0.995677	0.999748
chr10	18022172	18023292	1173	334	NA	NA	4.62702	4.51929	5.24367	4.7675	4.78937	0.61133	0.540994	0.999748
chr10	18318344	18319519	1176	335	NA	NA	4.51337	3.85764	4.98823	4.66205	4.50533	0.90426	0.365882	0.999748
chr10	19104881	19105375	1181	336	NA	NA	4.10623	3.4754	3.8792	2.45405	3.47872	-0.88243	0.377565	0.999748
chr10	20311833	20313177	1187	337	NA	NA	6.59192	5.4601	6.84517	5.84081	6.1845	0.44812	0.654076	0.999748
chr10	21160647	21161449	1192	338	NA	NA	4.89247	3.23808	4.70404	3.78645	4.15526	0.25443	0.799171	0.999748
chr10	22644963	22645590	1200	339	NA	NA	3.68426	3.58087	4.75547	3.40585	3.85661	0.63347	0.526438	0.999748
chr10	23349706	23350851	1202	340	NA	NA	4.83054	3.36162	4.89958	3.91442	4.25154	0.43955	0.660274	0.999748
chr10	23393759	23394379	1203	341	NA	NA	4.15758	3.23808	4.09419	3.40585	3.72392	0.07378	0.941185	0.999748
chr10	23786837	23787669	1205	342	NA	NA	5.50145	4.89143	5.49128	4.50828	5.09811	-0.27803	0.780999	0.999748
chr10	26374100	26374969	1219	346	NA	NA	4.10623	2.95388	4.70404	3.00706	3.6928	0.46015	0.645418	0.999748
chr10	26375760	26375960	1220	347	NA	NA	3.28322	3.23808	2.83754	3.11755	3.1191	-0.40022	0.689002	0.999748
chr10	30327812	30328638	1230	350	NA	NA	4.92246	4.5714	5.24367	3.71794	4.61387	-0.37622	0.706759	0.999748
chr10	30617896	30618637	1232	351	NA	NA	5.88331	5.08313	5.77909	4.66205	5.35189	-0.37131	0.710418	0.999748
chr10	33950981	33951562	NA	353	NA	NA	3.37284	1.42604	4.24573	3.49042	3.13376	2.07623	0.0378988	0.999748
chr10	34176309	34176522	1243	354	NA	NA	3.81792	3.4754	3.3866	2.6134	3.32333	-0.91419	0.36064	0.999748
chr10	36973929	36975068	1250	355	NA	NA	5.63424	3.58087	5.49128	4.54828	4.81367	0.58277	0.560065	0.999748
chr10	37136782	37137869	1251	356	NA	NA	5.26442	4.15953	5.0919	4.66205	4.79447	0.23327	0.81556	0.999748
chr10	37138871	37139499	1252	357	NA	NA	4.89247	4.35059	4.59534	3.22019	4.26465	-1.00906	0.312973	0.999748
chr10	37140519	37141674	1253	359	NA	NA	5.70497	5.34505	5.89827	4.92774	5.46901	-0.15834	0.87419	0.999748
chr10	37397366	37397844	1254	360	NA	NA	4.55226	3.58087	4.20931	3.49042	3.95822	-0.30634	0.75935	0.999748
chr10	38553675	38553932	NA	361	NA	NA	2.72586	3.36162	3.24985	2.88739	3.05618	0.03517	0.971941	0.999748
chr10	39226312	39227779	1259	363	NA	NA	5.54065	5.00948	5.49128	4.42477	5.11654	-0.4482	0.654016	0.999748
chr10	39321205	39321629	NA	364	NA	NA	3.28322	3.77115	4.05368	2.45405	3.39052	-0.3864	0.699208	0.999748
chr10	39731192	39733313	1263	366	NA	NA	7.08505	5.37468	7.03402	5.96424	6.3645	0.38066	0.703463	0.999748
chr10	39898999	39899364	1264	367	NA	NA	4.30147	2.129	3.96907	3.40585	3.45135	0.66759	0.504414	0.999748
chr10	40300749	40301322	1273	368	NA	NA	4.20715	3.23808	3.96907	3.40585	3.70504	-0.0497	0.960362	0.999748
chr10	41476320	41477980	1282	371	NA	NA	5.377	4.97119	5.5213	4.83375	5.17581	0.00484	0.996138	0.999748
chr10	41489835	41490771	1283	372	NA	NA	5.24081	4.40904	5.57953	4.89709	5.03162	0.5844	0.558964	0.999748
chr10	41518590	41520098	1284	373	NA	NA	5.95761	4.76286	6.24264	5.07195	5.50877	0.41996	0.674526	0.999748
chr10	41809545	41810786	1285	374	NA	NA	6.042	5.1532	6.42838	5.09914	5.68068	0.23491	0.814287	0.999748
chr10	42274814	42278505	1289	377	NA	NA	7.4723	6.40105	7.32105	6.4494	6.91095	-0.07274	0.942017	0.999748
chr10	42501572	42502852	1292	378	NA	NA	5.52118	4.35059	5.92097	5.47623	5.31724	1.07825	0.280949	0.999748
chr10	43220955	43221915	1299	379	NA	NA	5.1423	5.04677	5.47603	4.33613	5.00031	-0.26642	0.789922	0.999748
chr10	43439523	43439865	NA	380	NA	NA	3.08532	2.38341	3.73292	2.75689	2.98963	0.72176	0.470461	0.999748
chr10	43477976	43478590	NA	381	NA	NA	3.37284	2.59961	4.13359	2.75689	3.21573	0.64891	0.51641	0.999748
chr10	43479035	43479878	1300	381	NA	NA	5.46115	2.59961	5.00957	4.14063	4.30274	0.77008	0.441273	0.999748
chr10	43578333	43579951	1302	382	NA	NA	5.80497	5.04677	5.99772	4.98717	5.45916	0.09412	0.925018	0.999748
chr10	43722576	43723716	1304	385	NA	NA	6.0556	5.92816	5.5213	4.54828	5.51333	-1.35304	0.176073	0.999748
chr10	43901513	43901959	1305	386	NA	NA	4.73237	3.23808	4.20931	3.11755	3.82433	-0.45492	0.649178	0.999748
chr10	44267903	44268740	1306	387	NA	NA	5.00887	4.15953	5.34787	4.62512	4.78535	0.56872	0.569557	0.999748
chr10	45893829	45894840	1316	391	NA	NA	4.86184	4.84984	5.44504	3.49042	4.66178	-0.54867	0.583246	0.999748
chr10	52381676	52382527	1323	392	NA	NA	5.50145	4.46522	5.49128	4.42477	4.97068	-0.03578	0.971457	0.999748
chr10	53434797	53435091	1327	394	NA	NA	3.37284	3.67915	3.45041	1.83176	3.08354	-1.251	0.210964	0.999748
chr10	56114952	56115757	1332	395	NA	NA	5.0904	3.85764	5.41337	5.15203	4.87836	1.14324	0.252969	0.999748
chr10	56378749	56379125	1334	396	NA	NA	4.30147	3.23808	3.78335	2.75689	3.51995	-0.70637	0.479975	0.999748
chr10	56921024	56921613	1336	397	NA	NA	4.47341	4.22607	4.47778	3.97438	4.28791	-0.17482	0.861227	0.999748
chr10	59221080	59222689	1354	399	NA	NA	5.97202	4.93186	6.15918	5.45534	5.6296	0.50231	0.615459	0.999748
chr10	59323009	59323856	1355	400	NA	NA	6.10874	4.71733	6.287	5.22789	5.58524	0.4869	0.626337	0.999748
chr10	59511465	59511840	NA	401	NA	NA	3.37284	3.10297	3.62646	2.88739	3.24741	0.02689	0.978549	0.999748
chr10	59879237	59880173	1360	402	NA	NA	6.01441	4.6217	5.64916	4.69807	5.24584	-0.2042	0.838198	0.999748
chr10	59919791	59921784	1362	403	NA	NA	5.98629	4.71733	5.81589	5.07195	5.39786	0.13022	0.896398	0.999748
chr10	59951176	59952540	1363	404	NA	NA	6.17253	5.37468	6.46746	5.32321	5.83447	0.17209	0.863369	0.999748
chr10	60002425	60003736	1365	406	NA	NA	5.86797	5.11859	5.95437	5.12583	5.51669	0.06618	0.947234	0.999748
chr10	60277499	60278139	1372	407	NA	NA	4.34642	2.95388	4.44683	4.50828	4.06385	1.16971	0.242146	0.999748
chr10	60814106	60815050	1385	408	NA	NA	4.95184	3.67915	4.72998	4.08731	4.36207	0.13169	0.89523	0.999748
chr10	61648317	61649115	1396	409	NA	NA	4.89247	3.85764	4.59534	4.66205	4.50188	0.35858	0.71992	0.999748
chr10	62650529	62651970	1413	412	NA	NA	6.45498	5.5921	6.92595	5.82461	6.19941	0.49726	0.619018	0.999748
chr10	62792039	62792900	1415	413	NA	NA	5.7724	5.43219	5.99772	5.09914	5.57536	-0.07615	0.939304	0.999748
chr10	62886702	62887465	1417	414	NA	NA	3.94024	3.58087	4.59534	3.78645	3.97572	0.60838	0.542952	0.999748
chr10	62920128	62921196	1418	415	NA	NA	4.6981	3.4754	4.98823	4.33613	4.37447	0.81349	0.415956	0.999748
chr10	63023317	63024807	1421	416	NA	NA	6.45498	5.22002	6.69522	5.47623	5.96161	0.35092	0.725659	0.999748
chr10	63243650	63244570	1422	417	NA	NA	5.26442	4.6217	5.50636	4.7675	5.04	0.27408	0.78403	0.999748
chr10	63338497	63339594	1423	418	NA	NA	5.52118	3.10297	5.46062	4.98717	4.76798	1.28904	0.197414	0.999748
chr10	63428981	63430434	1424	419	NA	NA	5.46115	5.04677	5.94332	4.89709	5.33708	0.23502	0.814198	0.999748
chr10	67002460	67004616	1428	421	NA	NA	6.62877	5.8246	6.40442	5.7234	6.1453	-0.23012	0.818007	0.999748
chr10	67185645	67185920	1431	422	NA	NA	3.75264	2.95388	3.45041	3.00706	3.29099	-0.17604	0.860264	0.999748
chr10	67547946	67548760	1436	423	NA	NA	4.47341	2.78759	4.31593	4.19204	3.94224	0.88142	0.37811	0.999748
chr10	67549007	67549758	1437	423	NA	NA	4.98064	3.67915	4.67763	4.14063	4.36951	0.11201	0.910814	0.999748
chr10	68276358	68276870	1442	424	NA	NA	5.0904	4.67031	4.80512	3.97438	4.63505	-0.69357	0.487971	0.999748
chr10	69212455	69213406	1447	426	NA	NA	4.86184	4.28967	5.24367	4.80101	4.79905	0.63134	0.527834	0.999748
chr10	69583952	69584510	NA	427	NA	NA	3.37284	3.77115	4.44683	2.75689	3.58693	0.04222	0.966328	0.999748
chr10	71237664	71238467	1458	429	NA	NA	5.16756	3.93924	5.50636	4.7675	4.84517	0.82494	0.409423	0.999748
chr10	71344485	71345232	1460	430	NA	NA	4.92246	3.67915	4.85312	3.78645	4.31029	0.02684	0.97859	0.999748
chr10	71347330	71348645	1461	431	NA	NA	5.98629	4.71733	6.1496	4.92774	5.44524	0.26417	0.791655	0.999748
chr10	75036852	75037543	1468	432	NA	NA	5.00887	4.08977	5.56519	4.54828	4.80303	0.71734	0.473183	0.999748
chr10	75211859	75212530	1472	433	NA	NA	5.03656	4.01647	5.11177	4.50828	4.66827	0.4008	0.688578	0.999748
chr10	75837049	75837916	1479	434	NA	NA	5.44057	5.40372	6.05014	5.17776	5.51805	0.27116	0.786273	0.999748
chr10	78574171	78575371	1525	435	NA	NA	5.75584	5.187	6.287	5.04424	5.56852	0.27455	0.783669	0.999748
chr10	79681309	79683263	1536	436	NA	NA	6.30366	5.25231	6.77215	5.57637	5.97612	0.56021	0.575349	0.999748
chr10	79766567	79767984	1541	437	NA	NA	6.17253	4.67031	6.20614	5.22789	5.56922	0.41789	0.676034	0.999748
chr10	79840608	79841308	1544	438	NA	NA	4.43231	4.76286	4.82932	3.316	4.33512	-0.74209	0.458052	0.999748
chr10	79853465	79855110	1545	439	NA	NA	7.11782	5.80297	7.20561	6.31671	6.61078	0.4252	0.670702	0.999748
chr10	79908161	79909587	1549	440	NA	NA	6.10874	5.4601	6.44414	5.09914	5.77803	-0.01807	0.985587	0.999748
chr10	79926459	79928052	1552	441	NA	NA	5.48144	4.51929	5.76661	4.83375	5.15027	0.42385	0.671685	0.999748
chr10	79928335	79928688	NA	442	NA	NA	3.08532	2.78759	3.8792	3.22019	3.24307	0.86694	0.385997	0.999748
chr10	79929019	79929350	NA	442	NA	NA	2.42429	3.23808	3.51151	3.00706	3.04523	0.60521	0.545054	0.999748
chr10	79932451	79933579	1553	443	NA	NA	4.79856	3.77115	4.94459	3.78645	4.32519	0.11404	0.909211	0.999748
chr10	79945628	79946283	1554	444	NA	NA	4.10623	3.23808	4.53776	3.40585	3.82198	0.42361	0.671858	0.999748
chr10	79988001	79989211	1558	445	NA	NA	5.19239	4.5714	5.0919	4.33613	4.79796	-0.23734	0.812401	0.999748
chr10	79989490	79990339	1558	445	NA	NA	4.55226	3.77115	4.89958	3.97438	4.29934	0.38916	0.697168	0.999748
chr10	80039422	80039990	1562	446	NA	NA	4.47341	3.77115	4.80512	3.71794	4.19191	0.19686	0.843943	0.999748
chr10	80052977	80055171	1563	447	NA	NA	6.31501	5.43219	6.66864	5.55689	5.99318	0.33811	0.735288	0.999748
chr10	80141076	80142570	1570	448	NA	NA	5.63424	4.93186	5.74132	4.54828	5.21393	-0.19544	0.845049	0.999748
chr10	80147377	80152646	1574	450	NA	NA	7.59842	6.97549	8.12698	7.04642	7.43683	0.42375	0.671758	0.999748
chr10	80167361	80168598	1579	451	NA	NA	6.57313	5.25231	6.7342	5.65176	6.05285	0.3962	0.691968	0.999748
chr10	80226022	80226960	1584	452	NA	NA	6.13459	5.00948	6.56436	5.41263	5.78026	0.58875	0.556041	0.999748
chr10	80248948	80249698	1585	453	NA	NA	5.55986	5.34505	5.62171	4.19204	5.17967	-0.77129	0.440553	0.999748
chr10	80387679	80388355	NA	454	NA	NA	4.20715	3.4754	4.72998	3.49042	3.97574	0.38018	0.703818	0.999748
chr10	80398705	80400271	1597	455	NA	NA	7.01718	6.1839	7.33379	6.06421	6.64977	0.1392	0.889296	0.999748
chr10	80432942	80434363	1598	456	NA	NA	6.35954	6.02478	6.45973	5.43414	6.06955	-0.34668	0.728839	0.999748
chr10	80561186	80562098	1603	457	NA	NA	5.11658	3.85764	5.07175	3.85185	4.47446	-0.03578	0.971459	0.999748
chr10	80576585	80579675	1606	459	NA	NA	7.02411	5.90804	7.3631	6.14471	6.60999	0.40691	0.684085	0.999748
chr10	80602762	80603752	1609	460	NA	NA	4.89247	4.08977	5.2072	4.33613	4.63139	0.39661	0.691663	0.999748
chr10	80621974	80624129	1613	461	NA	NA	7.39953	6.74531	7.74977	6.59976	7.12359	0.14468	0.884968	0.999748
chr10	80754953	80755395	1618	462	NA	NA	4.83054	3.23808	4.59534	3.97438	4.15959	0.3542	0.723194	0.999748
chr10	80797534	80798970	1620	464	NA	NA	5.91349	4.67031	6.08071	5.01599	5.42012	0.36254	0.716953	0.999748
chr10	80900088	80901136	1623	465	NA	NA	5.78877	5.00948	6.18754	5.04424	5.50751	0.30644	0.759275	0.999748
chr10	80936138	80937395	1627	466	NA	NA	4.59013	4.08977	4.87654	4.58721	4.53591	0.55407	0.579543	0.999748
chr10	81167609	81168225	1639	467	NA	NA	5.50145	4.5714	5.5213	4.28968	4.97096	-0.18511	0.85315	0.999748
chr10	81176256	81178085	1642	470	NA	NA	5.24081	4.5714	5.38099	5.04424	5.05936	0.43331	0.664796	0.999748
chr10	81266623	81266985	1649	471	NA	NA	4.43231	3.77115	4.53776	3.316	4.01431	-0.24719	0.804769	0.999748
chr10	81319649	81321452	1655	472	NA	NA	7.43637	6.83332	7.74977	6.26962	7.07227	-0.17693	0.859569	0.999748
chr10	81429521	81430219	1667	473	NA	NA	4.39	3.58087	4.38286	4.14063	4.12359	0.39062	0.696084	0.999748
chr10	81430486	81431472	1667	473	NA	NA	4.55226	3.4754	4.82932	4.38113	4.30953	0.83606	0.403141	0.999748
chr10	81570303	81572497	1676	475	NA	NA	6.62877	6.11534	6.56436	5.67	6.24462	-0.36031	0.718623	0.999748
chr10	81626918	81627962	1680	476	NA	NA	5.16756	4.40904	5.34787	4.50828	4.85819	0.19759	0.843369	0.999748
chr10	82178168	82178868	1687	477	NA	NA	4.51337	3.77115	5.00957	4.19204	4.37154	0.64825	0.51684	0.999748
chr10	82629293	82630134	1691	478	NA	NA	5.24081	4.807	5.56519	4.14063	4.93841	-0.24174	0.808987	0.999748
chr10	82698721	82699790	1692	479	NA	NA	5.1423	4.08977	5.07175	4.50828	4.70302	0.24596	0.805718	0.999748
chr10	83042685	83043192	1697	480	NA	NA	3.81792	3.10297	3.57013	3.71794	3.55224	0.25955	0.795219	0.999748
chr10	83359978	83360720	1698	481	NA	NA	5.26442	3.85764	5.56519	4.69807	4.84633	0.80666	0.419884	0.999748
chr10	84440179	84441743	1706	485	NA	NA	6.10874	4.28967	5.82795	5.25232	5.36967	0.48197	0.629836	0.999748
chr10	84916868	84917863	1710	486	NA	NA	6.42386	5.92816	6.38005	5.09914	5.9578	-0.61696	0.537274	0.999748
chr10	85102084	85103031	1711	487	NA	NA	5.55986	3.23808	5.55071	4.66205	4.75268	1.00007	0.317302	0.999748
chr10	85578642	85578904	NA	488	NA	NA	2.42429	2.95388	2.63277	3.22019	2.80778	0.33561	0.737172	0.999748
chr10	85579033	85579298	1718	488	NA	NA	4.20715	3.4754	3.17628	3.22019	3.51976	-0.90908	0.363331	0.999748
chr10	86294719	86295077	NA	489	NA	NA	2.85588	2.59961	3.45041	2.45405	2.83999	0.31735	0.750986	0.999748
chr10	86295336	86296515	1724	489	NA	NA	5.00887	4.93186	5.11177	4.46713	4.87991	-0.25577	0.798136	0.999748
chr10	86425614	86426016	1726	490	NA	NA	4.20715	3.4754	3.92483	3.00706	3.65361	-0.53061	0.595701	0.999748
chr10	86705021	86706496	1729	491	NA	NA	6.97487	6.6756	7.37136	6.14471	6.79163	-0.095	0.924319	0.999748
chr10	87101589	87102084	1732	492	NA	NA	3.99772	3.58087	4.05368	2.27488	3.47679	-0.88359	0.37694	0.999748
chr10	87868440	87869894	1736	496	NA	NA	5.48144	4.97119	5.00957	3.71794	4.79504	-1.21941	0.222719	0.999748
chr10	88503377	88504221	1743	498	NA	NA	5.16756	3.93924	4.96658	4.50828	4.64541	0.26016	0.794746	0.999748
chr10	88730587	88731520	1744	499	NA	NA	5.16756	4.40904	5.0306	3.97438	4.6454	-0.40406	0.68618	0.999748
chr10	91181423	91182739	1756	500	NA	NA	6.19727	5.51436	6.59997	5.45534	5.94173	0.24293	0.808068	0.999748
chr10	93160368	93161466	1763	501	NA	NA	5.16756	3.58087	5.41337	4.66205	4.70596	0.93799	0.348273	0.999748
chr10	93310832	93311322	NA	502	NA	NA	3.53694	2.78759	4.09419	3.49042	3.47729	0.8907	0.373114	0.999748
chr10	95501335	95501969	1782	503	NA	NA	3.88038	2.95388	4.05368	3.40585	3.57345	0.44197	0.658518	0.999748
chr10	95514483	95515732	1783	504	NA	NA	6.6558	5.54074	6.64156	5.70582	6.13598	0.10662	0.915091	0.999748
chr10	98913872	98916013	1793	505	NA	NA	7.14987	5.51436	7.16815	6.25761	6.5225	0.53829	0.590388	0.999748
chr10	99106827	99108500	1794	506	NA	NA	5.92835	4.67031	5.50636	5.51712	5.40553	0.30029	0.76396	0.999748
chr10	99261570	99264027	1797	507	NA	NA	6.60122	5.68964	6.29572	5.7234	6.07749	-0.19208	0.847682	0.999748
chr10	99268576	99269619	1798	508	NA	NA	5.59753	4.84984	4.98823	4.50828	4.98597	-0.67212	0.501526	0.999748
chr10	99298677	99299554	1801	509	NA	NA	5.7724	5.08313	5.13137	4.03195	5.00471	-1.19614	0.231669	0.999748
chr10	99374945	99375223	1803	512	NA	NA	5.19239	4.97119	3.09876	2.45405	3.9291	-3.25915	0.00112125	0.999748
chr10	99570282	99570502	NA	513	NA	NA	2.85588	2.78759	3.24985	2.27488	2.79205	-0.08394	0.933107	0.999748
chr10	100486820	100487939	1805	514	NA	NA	6.33745	5.68964	6.78458	5.68802	6.12492	0.31491	0.752836	0.999748
chr10	103028202	103028880	1813	516	NA	NA	5.03656	3.58087	4.38286	3.316	4.07907	-0.64929	0.516166	0.999748
chr10	105430888	105431146	1818	517	NA	NA	3.75264	1.81992	3.3866	1.54586	2.62626	-0.45245	0.650956	0.999748
chr10	108161529	108162841	1825	518	NA	NA	5.95761	4.22607	6.19687	5.25232	5.40822	0.89453	0.371058	0.999748
chr10	111009522	111010475	1833	519	NA	NA	5.72213	3.93924	5.36452	5.09914	5.03126	0.56711	0.570655	0.999748
chr10	111506146	111507336	1837	520	NA	NA	5.86797	3.85764	5.5213	4.62512	4.96801	0.29744	0.766135	0.999748
chr10	111539942	111540168	1838	521	NA	NA	3.45722	2.95388	3.01683	3.40585	3.20844	0.00818	0.993471	0.999748
chr10	115251169	115251872	1844	523	NA	NA	5.39851	3.4754	4.87654	3.97438	4.43121	-0.01625	0.987036	0.999748
chr10	115362141	115362784	1846	524	NA	NA	4.51337	3.85764	5.2072	3.91442	4.37316	0.53056	0.595733	0.999748
chr10	115384093	115385790	1847	525	NA	NA	6.79201	6.02478	7.01304	5.94938	6.4448	0.10294	0.918011	0.999748
chr10	116580651	116582093	1852	527	NA	NA	5.35518	3.85764	5.62171	5.01599	4.96263	1.00718	0.313875	0.999748
chr10	116950149	116950715	1855	528	NA	NA	4.51337	3.36162	4.82932	4.28968	4.2485	0.87934	0.37924	0.999748
chr10	117583650	117584186	1860	529	NA	NA	4.59013	4.89143	4.59534	3.78645	4.46584	-0.77737	0.436957	0.999748
chr10	117669536	117670023	1863	530	NA	NA	4.25508	4.01647	4.44683	3.22019	3.98464	-0.42732	0.669159	0.999748
chr10	117710037	117711039	1864	531	NA	NA	5.03656	3.67915	5.05132	4.62512	4.59804	0.6791	0.497092	0.999748
chr10	118868929	118869140	NA	532	NA	NA	3.18766	1.42604	3.31984	2.6134	2.63673	0.93273	0.350984	0.999748
chr10	118869347	118870697	1869	533	NA	NA	5.03656	4.35059	5.50636	4.7332	4.90668	0.60253	0.546836	0.999748
chr10	120369375	120369661	NA	534	NA	NA	3.68426	3.10297	3.45041	1.83176	3.01735	-1.06385	0.287422	0.999748
chr10	120475102	120475403	NA	537	NA	NA	3.28322	2.129	3.57013	2.27488	2.81431	0.30592	0.759673	0.999748
chr10	120475942	120477174	1876	538	NA	NA	5.0904	4.08977	5.60779	4.98717	4.94378	1.00005	0.317313	0.999748
chr10	120552137	120553330	1878	539	NA	25	4.30147	3.85764	4.96658	4.14063	4.31658	0.67016	0.502771	0.999748
chr10	120744487	120744819	1880	543	NA	NA	3.88038	3.85764	3.51151	2.45405	3.42589	-1.25287	0.210282	0.999748
chr10	120745122	120745330	1880	543	NA	NA	3.81792	3.10297	3.09876	2.75689	3.19413	-0.75297	0.451485	0.999748
chr10	120872206	120872958	1882	545	NA	NA	6.0556	6.16706	5.71559	4.66205	5.65007	-1.30416	0.19221	0.999748
chr10	120898458	120899081	1883	546	NA	NA	4.20715	2.78759	4.47778	3.85185	3.83109	0.94357	0.345413	0.999748
chr10	121099763	121100117	NA	547	NA	NA	3.53694	2.95388	3.78335	1.83176	3.02648	-0.619	0.535934	0.999748
chr10	121227953	121228340	NA	548	NA	NA	3.08532	2.78759	3.92483	3.11755	3.22882	0.82665	0.408455	0.999748
chr10	121435704	121437089	1887	549	NA	NA	4.25508	4.71733	4.85312	4.50828	4.58345	0.27496	0.783353	0.999748
chr10	121475379	121476962	1888	550	NA	NA	6.18495	4.89143	6.5055	5.43414	5.75401	0.6102	0.541746	0.999748
chr10	121625930	121626806	1891	551	NA	NA	6.32627	4.807	6.11064	5.34609	5.6475	0.22863	0.819159	0.999748
chr10	122886432	122886998	1900	552	NA	NA	4.79856	4.807	4.34978	3.85185	4.4518	-0.99237	0.321041	0.999748
chr10	122912801	122913376	1902	553	NA	NA	4.30147	4.35059	4.38286	3.316	4.08773	-0.67377	0.500471	0.999748
chr10	122985760	122986719	1903	554	NA	NA	5.2168	2.78759	5.13137	3.78645	4.23055	0.64565	0.518518	0.999748
chr10	123196555	123197344	1906	555	NA	NA	5.00887	2.95388	5.18861	4.46713	4.40462	1.19669	0.231454	0.999748
chr10	125809913	125810803	1915	558	NA	NA	4.86184	5.25231	5.07175	3.78645	4.74309	-0.88777	0.374686	0.999748
chr10	125921823	125922550	1916	559	NA	NA	4.95184	4.35059	4.85312	3.85185	4.50185	-0.42232	0.672802	0.999748
chr10	126028791	126029411	1919	564	NA	NA	3.75264	2.95388	4.17195	2.45405	3.33313	-0.05692	0.954613	0.999748
chr10	126971752	126972480	1922	565	NA	NA	4.47341	4.22607	4.65072	3.64602	4.24905	-0.28468	0.775893	0.999748
chr10	126978130	126979180	1923	566	NA	NA	6.24553	5.28389	6.17815	4.83375	5.63533	-0.36581	0.714513	0.999748
chr10	127030428	127030818	1925	567	NA	NA	3.81792	2.78759	3.78335	3.00706	3.34898	0.13069	0.896022	0.999748
chr10	127041437	127042232	1926	568	NA	NA	5.06373	3.85764	5.26157	4.50828	4.6728	0.59975	0.548689	0.999748
chr10	127063176	127064108	1928	569	NA	NA	6.09564	5.08313	6.42838	5.36861	5.74394	0.437	0.66212	0.999748
chr10	127188446	127190244	1933	572	NA	NA	5.41969	4.5714	6.12048	5.27634	5.34698	0.99364	0.320422	0.999748
chr10	127288041	127291447	1936	574	NA	NA	7.21796	6.24935	7.48617	6.65577	6.90231	0.47686	0.63347	0.999748
chr10	127508322	127509951	1941	575	NA	NA	5.24081	5.04677	5.53608	4.95776	5.19535	0.14579	0.884086	0.999748
chr10	127510239	127512374	1943	576	NA	NA	6.23361	5.96759	6.1496	5.09914	5.86249	-0.67325	0.500803	0.999748
chr10	127521992	127522404	NA	577	NA	NA	3.45722	1.81992	3.68067	2.88739	2.9613	0.91249	0.361531	0.999748
chr10	127619850	127621008	NA	578	NA	NA	4.053	4.01647	4.96658	3.91442	4.23761	0.57363	0.56623	0.999748
chr10	127621240	127622568	1948	579	NA	NA	5.48144	4.84984	5.79146	4.69807	5.2052	0.11186	0.910938	0.999748
chr10	127666224	127668489	1950	580	NA	NA	6.44468	6.02478	6.54257	5.79166	6.20092	-0.09559	0.923849	0.999748
chr10	127676603	127677430	1951	581	NA	NA	5.11658	4.40904	5.6355	4.86576	5.00672	0.68963	0.49044	0.999748
chr10	128058396	128059566	1958	582	NA	NA	5.80497	4.97119	6.03981	5.09914	5.47878	0.25644	0.797615	0.999748
chr10	128231773	128232895	1965	584	NA	NA	5.0904	4.22607	5.34787	4.7332	4.84938	0.54046	0.588891	0.999748
chr10	128302974	128303736	1967	585	NA	NA	5.59753	5.43219	5.74132	4.7332	5.37606	-0.39244	0.69474	0.999748
chr10	128304121	128304501	NA	585	NA	NA	2.85588	2.38341	3.62646	1.83176	2.67438	0.15475	0.877021	0.999748
chr10	128322207	128323164	1968	586	NA	NA	4.98064	4.807	5.36452	3.78645	4.73465	-0.45003	0.652696	0.999748
chr10	128409134	128410295	1972	587	NA	NA	5.377	5.11859	5.88679	4.95776	5.33504	0.24666	0.805177	0.999748
chr10	128498651	128499001	1976	588	NA	NA	4.053	3.93924	5.05132	3.91442	4.23949	0.68812	0.491391	0.999748
chr10	128695754	128696810	1984	589	NA	NA	7.03101	6.85451	7.44369	6.28154	6.90269	-0.1133	0.909797	0.999748
chr10	128803964	128805796	1987	592	NA	NA	6.3813	5.7587	6.59997	5.77489	6.12872	0.16601	0.868151	0.999748
chr10	128888679	128889932	1989	593	NA	NA	5.11658	5.54074	5.82795	4.86576	5.33776	0.02572	0.979478	0.999748
chr10	128890277	128893072	1990	594	NA	NA	5.70497	5.11859	6.29572	5.67	5.69732	0.80734	0.419491	0.999748
chr10	128909377	128911161	1991	595	NA	NA	5.55986	4.15953	5.6761	5.22789	5.15585	0.83734	0.402422	0.999748
chr10	128923180	128923764	1992	596	NA	NA	4.47341	2.59961	4.4152	3.85185	3.83502	0.84401	0.398687	0.999748
chr10	128977669	128979314	1993	597	NA	NA	4.663	5.187	5.6761	4.50828	5.00859	0.23635	0.813162	0.999748
chr11	3202043	3203220	2000	598	NA	NA	5.31051	3.77115	5.46062	4.80101	4.83582	0.83406	0.40427	0.999748
chr11	3265462	3266878	2002	599	NA	NA	5.75584	5.00948	6.11064	4.69807	5.3935	0.03067	0.975533	0.999748
chr11	3288459	3290864	2003	601	NA	NA	6.3813	5.48748	6.77837	5.77489	6.10551	0.48383	0.628518	0.999748
chr11	3291119	3291405	2003	602	NA	NA	3.75264	2.78759	3.57013	3.11755	3.30698	0.10423	0.916989	0.999748
chr11	3291488	3291849	2003	602	NA	NA	3.81792	2.129	3.51151	3.64602	3.27611	0.85572	0.392173	0.999748
chr11	3292455	3292925	2004	603	NA	NA	3.94024	3.4754	3.8792	3.71794	3.7532	0.12829	0.897922	0.999748
chr11	3374097	3374881	NA	604	NA	NA	3.45722	3.67915	4.28126	3.64602	3.76591	0.55906	0.576137	0.999748
chr11	3451794	3452962	2008	605	NA	NA	5.50145	4.6217	5.6355	4.58721	5.08647	0.07038	0.943896	0.999748
chr11	3894713	3895511	2014	606	NA	NA	4.15758	4.6217	5.0306	4.24169	4.51289	0.34848	0.727483	0.999748
chr11	3963696	3964088	2016	607	NA	NA	3.45722	3.77115	3.8792	2.75689	3.46611	-0.41866	0.675473	0.999748
chr11	4096240	4097110	2019	609	NA	NA	5.06373	4.84984	5.59373	4.62512	5.0331	0.21579	0.829159	0.999748
chr11	4160109	4160869	2022	610	NA	NA	4.15758	3.67915	4.53776	3.85185	4.05658	0.39081	0.695945	0.999748
chr11	4308865	4309261	NA	611	NA	NA	3.53694	2.95388	4.05368	3.11755	3.41551	0.48095	0.63056	0.999748
chr11	4848848	4849946	2031	613	NA	NA	5.95761	5.187	6.26055	5.47623	5.72035	0.41858	0.675534	0.999748
chr11	5444669	5445357	2042	615	NA	NA	5.82098	4.08977	5.76661	4.46713	5.03612	0.2283	0.819415	0.999748
chr11	5761980	5762741	2046	616	NA	NA	5.03656	3.93924	4.96658	4.08731	4.50742	0.0552	0.955982	0.999748
chr11	5788203	5789035	2047	617	NA	NA	5.28765	3.85764	5.00957	4.24169	4.59914	0.0749	0.940292	0.999748
chr11	6267476	6268112	2055	618	NA	NA	4.73237	4.46522	4.89958	3.78645	4.4709	-0.3616	0.717661	0.999748
chr11	6414786	6416643	2059	620	NA	NA	6.08241	4.67031	6.66864	5.47623	5.7244	0.98405	0.325117	0.999748
chr11	6444095	6444840	2060	622	NA	NA	6.61964	5.71303	6.69522	5.45534	6.12081	-0.12873	0.897575	0.999748
chr11	6546061	6547451	2064	623	NA	NA	6.15999	4.5714	6.01892	5.22789	5.49455	0.36432	0.715625	0.999748
chr11	8624240	8624847	2073	624	NA	NA	4.15758	3.77115	4.31593	3.71794	3.99065	0.07432	0.940759	0.999748
chr11	8656807	8657160	2074	625	NA	NA	4.20715	4.15953	3.73292	3.316	3.8539	-0.93146	0.351639	0.999748
chr11	8658886	8659430	2075	626	NA	NA	4.43231	4.22607	4.34978	3.64602	4.16354	-0.46835	0.639548	0.999748
chr11	8814457	8814743	2079	627	NA	NA	2.04255	3.85764	3.57013	2.27488	2.9363	-0.03901	0.968886	0.999748
chr11	11808690	11809878	2085	628	NA	NA	6.39206	5.11859	6.11064	5.25232	5.7184	-0.10439	0.916858	0.999748
chr11	11828246	11828788	2087	631	NA	NA	3.94024	3.58087	4.24573	3.11755	3.7211	-0.11156	0.911178	0.999748
chr11	17211310	17212107	2095	633	NA	NA	5.24081	4.46522	5.53608	4.46713	4.92731	0.21006	0.833624	0.999748
chr11	17450473	17450946	2098	634	NA	NA	4.95184	4.84984	4.56684	3.78645	4.53874	-1.0238	0.305954	0.999748
chr11	18712344	18713050	2100	635	NA	NA	3.61248	4.67031	4.50808	3.57032	4.0903	-0.14447	0.885132	0.999748
chr11	18758462	18759131	2102	636	NA	NA	5.19239	5.3148	5.18861	3.91442	4.90255	-0.99253	0.320961	0.999748
chr11	19631041	19631879	2111	637	NA	NA	4.663	4.28967	4.78051	3.40585	4.28476	-0.54167	0.588055	0.999748
chr11	19923969	19924661	2114	639	NA	NA	5.54065	4.97119	5.31396	4.62512	5.11273	-0.40486	0.68559	0.999748
chr11	19924814	19926139	2115	640	NA	NA	5.0904	4.28967	5.36452	4.92774	4.91808	0.64479	0.51908	0.999748
chr11	19986943	19987345	NA	641	NA	NA	3.45722	3.67915	3.62646	3.49042	3.56331	-0.01377	0.989014	0.999748
chr11	20741278	20741909	2126	642	NA	NA	5.59753	4.84984	6.01892	4.92774	5.34851	0.35293	0.72415	0.999748
chr11	21238629	21239716	2130	643	NA	NA	5.00887	2.59961	4.78051	4.03195	4.10523	0.85104	0.39477	0.999748
chr11	21370474	21371593	2131	644	NA	NA	6.10874	4.40904	6.30437	5.25232	5.51862	0.73436	0.462748	0.999748
chr11	22981786	22982440	2139	645	NA	NA	4.34642	3.77115	4.56684	4.08731	4.19293	0.37929	0.704484	0.999748
chr11	23305493	23307368	2147	647	NA	NA	6.45498	5.3148	6.59997	5.84081	6.05264	0.4743	0.635295	0.999748
chr11	23632978	23634075	2149	648	NA	NA	5.2168	4.22607	5.29671	3.71794	4.61438	-0.30269	0.762134	0.999748
chr11	23665587	23666596	2150	649	NA	NA	6.48544	5.7587	6.62092	5.55689	6.10548	-0.04689	0.962604	0.999748
chr11	23770487	23771477	2151	650	NA	NA	6.02827	4.22607	5.46062	5.22789	5.23571	0.30689	0.758931	0.999748
chr11	24074170	24074791	2154	652	NA	NA	4.95184	4.93186	4.20931	3.40585	4.37472	-1.60353	0.10885	0.999748
chr11	24077188	24078339	2155	653	NA	NA	5.35518	5.11859	5.64916	4.58721	5.17753	-0.1678	0.866741	0.999748
chr11	24079912	24080417	NA	655	NA	NA	3.53694	3.4754	3.8792	3.11755	3.50227	-0.01102	0.991209	0.999748
chr11	24080641	24081853	2156	655	NA	NA	4.89247	4.28967	4.72998	4.03195	4.48602	-0.29702	0.766454	0.999748
chr11	25104458	25104786	NA	657	NA	NA	3.28322	3.67915	3.57013	3.49042	3.50573	0.06941	0.944668	0.999748
chr11	26489739	26490448	2168	659	NA	NA	5.06373	4.46522	5.0919	4.33613	4.73925	-0.07133	0.943133	0.999748
chr11	28365285	28365765	NA	660	NA	NA	3.28322	3.23808	4.012	3.97438	3.62692	1.03559	0.300417	0.999748
chr11	29526160	29526716	NA	661	NA	NA	3.45722	3.23808	4.4152	3.71794	3.70711	1.01634	0.309491	0.999748
chr11	29547666	29548487	2176	662	NA	NA	4.83054	4.5714	5.07175	3.57032	4.511	-0.53712	0.591196	0.999748
chr11	29692381	29694237	2177	663	NA	NA	6.47535	5.90804	6.80302	5.90385	6.27256	0.22865	0.819143	0.999748
chr11	30267158	30268801	2182	664	NA	NA	5.59753	3.77115	5.93219	4.50828	4.95229	0.75759	0.448713	0.999748
chr11	32347468	32347775	2200	666	NA	NA	3.81792	2.59961	3.73292	3.316	3.36661	0.44631	0.655386	0.999748
chr11	32454424	32456085	2201	667	NA	NA	6.26906	4.6217	6.51299	5.51712	5.73022	0.80535	0.420636	0.999748
chr11	32641996	32643287	2205	668	NA	NA	5.91349	4.6217	5.75402	4.92774	5.30424	0.1036	0.917485	0.999748
chr11	32963670	32964085	2210	669	NA	NA	4.43231	3.4754	3.96907	3.40585	3.82066	-0.3766	0.706475	0.999748
chr11	33162388	33163526	2213	670	NA	NA	6.23361	4.5714	6.22451	5.45534	5.62122	0.61837	0.536344	0.999748
chr11	34833379	34833951	2217	672	NA	NA	4.47341	2.95388	4.4152	3.71794	3.89011	0.49893	0.617838	0.999748
chr11	35120711	35121502	2222	674	NA	NA	4.59013	4.08977	4.67763	3.71794	4.26887	-0.20098	0.840718	0.999748
chr11	37031270	37032053	2238	677	NA	NA	5.82098	5.96759	5.1507	3.91442	5.21342	-1.92508	0.054248	0.999748
chr11	40394641	40394988	2240	678	NA	NA	4.34642	3.58087	3.45041	2.88739	3.56627	-1.12353	0.261238	0.999748
chr11	43528229	43529504	2249	679	NA	NA	4.6981	4.01647	5.34787	4.83375	4.72405	1.03699	0.299768	0.999748
chr11	44470091	44471217	2254	680	NA	NA	5.28765	4.35059	5.07175	4.38113	4.77278	-0.13102	0.895762	0.999748
chr11	44518683	44518992	2255	681	NA	NA	4.20715	2.129	3.68067	3.11755	3.2836	0.32662	0.743964	0.999748
chr11	44519202	44519565	2255	681	NA	NA	3.94024	2.38341	3.78335	2.45405	3.14026	-0.06097	0.951383	0.999748
chr11	45550305	45551161	2263	686	NA	NA	6.17253	5.96759	5.2072	4.24169	5.39725	-1.9023	0.0571606	0.999748
chr11	46436812	46437395	2273	688	NA	NA	4.79856	3.23808	4.62329	4.03195	4.17297	0.43727	0.661927	0.999748
chr11	48816161	48817805	2277	689	NA	NA	6.51526	5.54074	7.08516	5.67	6.20279	0.49421	0.621172	0.999748
chr11	49243449	49244534	2285	690	NA	NA	6.31501	5.54074	6.981	5.80823	6.16124	0.65983	0.509379	0.999748
chr11	50376834	50378699	2302	691	NA	NA	6.47535	5.8246	6.71484	5.88834	6.22578	0.21434	0.830287	0.999748
chr11	50430811	50431090	2303	692	NA	NA	3.45722	2.38341	3.73292	3.40585	3.24485	0.9176	0.358853	0.999748
chr11	50622091	50622782	2305	693	NA	NA	4.43231	4.15953	4.59534	4.33613	4.38083	0.24007	0.810278	0.999748
chr11	51262735	51263426	2311	694	NA	NA	5.0904	3.58087	5.41337	4.33613	4.60519	0.76216	0.445985	0.999748
chr11	51523166	51524033	2315	698	NA	NA	4.55226	3.58087	4.89958	4.08731	4.28001	0.60349	0.546198	0.999748
chr11	51543345	51543977	2317	699	NA	NA	4.89247	4.76286	4.82932	3.316	4.45016	-1.06735	0.285839	0.999748
chr11	51999677	52001137	2330	700	NA	NA	6.09564	4.76286	6.37184	5.09914	5.58237	0.43293	0.665073	0.999748
chr11	52003569	52004527	2331	701	NA	NA	5.16756	4.6217	5.57953	4.58721	4.989	0.26682	0.789613	0.999748
chr11	52098309	52099622	2332	702	NA	NA	5.80497	4.15953	5.93219	5.07195	5.24216	0.73488	0.462432	0.999748
chr11	53299665	53301086	2339	703	NA	NA	5.39851	4.97119	5.82795	4.7675	5.24129	0.15957	0.87322	0.999748
chr11	53350493	53350943	2341	704	NA	NA	4.55226	3.10297	4.59534	4.24169	4.12306	0.83536	0.403534	0.999748
chr11	54057517	54057861	NA	705	NA	NA	3.18766	2.38341	3.83207	2.75689	3.04001	0.7195	0.471852	0.999748
chr11	54058641	54058998	NA	706	NA	NA	2.85588	2.129	3.51151	2.27488	2.69282	0.56655	0.571036	0.999748
chr11	54060383	54060895	NA	707	NA	NA	2.97516	3.23808	4.09419	2.75689	3.26608	0.45086	0.652101	0.999748
chr11	54786916	54788088	2359	708	NA	NA	5.70497	5.187	6.07059	5.45534	5.60447	0.44811	0.654081	0.999748
chr11	54860205	54861027	2360	709	NA	NA	5.2168	4.5714	5.44504	4.54828	4.94538	0.14499	0.884724	0.999748
chr11	54866108	54866963	2361	710	NA	NA	4.39	3.77115	4.72998	4.28968	4.29521	0.60684	0.543969	0.999748
chr11	57548968	57549424	2373	711	NA	NA	4.20715	3.85764	4.4152	2.75689	3.80922	-0.63101	0.528047	0.999748
chr11	57644729	57645727	2374	712	NA	NA	5.26442	2.95388	5.22555	4.19204	4.40897	0.84773	0.39661	0.999748
chr11	57827444	57827752	2379	713	NA	NA	3.99772	3.85764	3.57013	2.88739	3.57822	-0.98807	0.323142	0.999748
chr11	57882942	57883154	NA	714	NA	NA	2.97516	2.38341	3.31984	1.83176	2.62754	-0.14629	0.883695	0.999748
chr11	57886108	57886374	2380	715	NA	NA	3.99772	4.28967	3.45041	2.6134	3.5878	-1.57175	0.11604	0.999748
chr11	58171471	58171923	2387	716	NA	NA	3.75264	3.93924	4.09419	3.22019	3.75156	-0.26684	0.7896	0.999748
chr11	58306955	58307732	2391	717	NA	NA	4.62702	3.23808	4.56684	4.33613	4.19202	0.73362	0.463198	0.999748
chr11	59163272	59163830	2402	719	NA	NA	5.44057	4.01647	5.24367	4.38113	4.77046	0.11859	0.905603	0.999748
chr11	59208156	59209613	2404	720	NA	NA	5.26442	4.15953	5.38099	4.89709	4.92551	0.60374	0.546027	0.999748
chr11	59227682	59228854	2405	721	NA	NA	5.46115	4.28967	5.6355	5.04424	5.10764	0.65661	0.511448	0.999748
chr11	59336236	59336789	NA	722	NA	NA	2.85588	3.36162	3.96907	3.22019	3.35169	0.68689	0.492167	0.999748
chr11	59449860	59450612	2409	723	NA	NA	4.25508	3.36162	4.75547	3.22019	3.89809	0.25373	0.79971	0.999748
chr11	59839079	59839958	2414	724	NA	NA	5.31051	4.46522	5.47603	4.46713	4.92972	0.11834	0.905798	0.999748
chr11	60105860	60107061	2419	726	NA	NA	5.11658	3.58087	5.1507	4.42477	4.56823	0.62063	0.534854	0.999748
chr11	60113944	60115676	2421	729	NA	NA	5.46115	4.93186	5.83991	5.04424	5.31929	0.34716	0.728476	0.999748
chr11	60139442	60140660	2422	731	NA	NA	5.55986	4.89143	5.5213	4.66205	5.15866	-0.1894	0.849785	0.999748
chr11	60141239	60141445	NA	731	NA	NA	2.97516	2.95388	3.01683	2.07027	2.75403	-0.59513	0.551772	0.999748
chr11	60175477	60176112	2424	732	NA	NA	4.86184	3.4754	4.13359	4.08731	4.13954	-0.08223	0.934464	0.999748
chr11	60176424	60177591	2424	733	NA	NA	5.16756	4.84984	5.62171	4.62512	5.06606	0.16217	0.871173	0.999748
chr11	60210309	60210871	2426	734	NA	NA	5.11658	3.4754	4.89958	4.08731	4.39472	0.27915	0.780139	0.999748
chr11	60219940	60220694	2427	735	NA	NA	3.94024	4.15953	4.70404	3.64602	4.11246	0.17692	0.859577	0.999748
chr11	60416791	60418321	2431	736	NA	NA	6.19727	4.67031	6.21535	5.49682	5.64494	0.597	0.55052	0.999748
chr11	60537029	60538390	2434	737	NA	NA	6.47535	5.56665	6.29572	4.92774	5.81637	-0.57859	0.562878	0.999748
chr11	60726984	60728644	2437	738	NA	NA	5.24081	4.46522	5.6355	5.01599	5.08938	0.6683	0.503957	0.999748
chr11	60776717	60777719	2438	739	NA	NA	5.16756	3.85764	5.18861	4.54828	4.69052	0.50306	0.614932	0.999748
chr11	61174290	61175567	2444	740	NA	NA	6.6647	6.35719	7.19634	5.91918	6.53435	0.06618	0.947236	0.999748
chr11	61484293	61485718	2449	742	NA	NA	5.52118	4.89143	5.72851	4.7332	5.21858	0.0347	0.972317	0.999748
chr11	61493721	61494823	2450	743	NA	NA	6.41334	5.96759	6.80302	5.39079	6.14368	-0.13226	0.894779	0.999748
chr11	61504791	61505417	2451	744	NA	NA	4.79856	3.67915	4.65072	3.97438	4.2757	0.10419	0.917023	0.999748
chr11	61929826	61930677	2459	745	NA	NA	5.03656	4.28967	4.85312	4.50828	4.67191	0.02486	0.980169	0.999748
chr11	62458334	62458799	2466	746	NA	NA	3.94024	3.10297	4.05368	3.00706	3.52599	0.01239	0.990116	0.999748
chr11	62921193	62921888	2478	748	NA	NA	4.663	4.51929	4.56684	3.11755	4.21667	-1.05879	0.28972	0.999748
chr11	64079143	64079746	NA	752	NA	NA	3.68426	3.67915	4.28126	3.91442	3.88977	0.58829	0.556349	0.999748
chr11	64588084	64588675	2485	754	NA	NA	4.89247	4.40904	4.17195	3.316	4.19737	-1.28192	0.1999	0.999748
chr11	64671964	64672501	2486	755	NA	NA	4.59013	3.58087	4.62329	3.11755	3.97796	-0.30405	0.761097	0.999748
chr11	64800986	64801481	2488	756	NA	NA	4.43231	3.4754	4.20931	3.64602	3.94076	-0.03703	0.970465	0.999748
chr11	64899045	64900183	2490	757	NA	NA	5.1423	4.97119	5.2072	3.57032	4.72275	-0.94433	0.345022	0.999748
chr11	64968542	64969339	2491	758	NA	NA	5.28765	4.93186	4.80512	3.97438	4.74975	-1.01788	0.308762	0.999748
chr11	68638343	68638618	2505	759	NA	NA	3.61248	2.95388	3.3866	2.45405	3.10175	-0.51297	0.607984	0.999748
chr11	68852321	68853739	2507	761	NA	NA	6.06907	4.93186	5.97621	5.20305	5.54505	0.12605	0.899697	0.999748
chr11	69366152	69367162	2535	762	NA	NA	5.00887	5.22002	4.89958	4.42477	4.88831	-0.63938	0.522591	0.999748
chr11	69367651	69369135	2536	763	NA	NA	4.55226	3.77115	5.2072	4.14063	4.41781	0.72411	0.469014	0.999748
chr11	69410397	69412004	2543	764	NA	NA	5.19239	4.15953	5.93219	5.32321	5.15183	1.34548	0.1785	0.999748
chr11	69415494	69416198	2545	766	NA	NA	3.94024	3.67915	4.59534	3.64602	3.96519	0.43964	0.660205	0.999748
chr11	69417479	69419907	2547	769	NA	NA	6.68234	6.28099	6.80302	6.00794	6.44357	-0.1077	0.914232	0.999748
chr11	69546470	69547003	2549	770	NA	NA	4.15758	3.23808	4.4152	3.78645	3.89933	0.56972	0.568881	0.999748
chr11	69559946	69560495	2550	771	NA	NA	4.51337	4.15953	4.47778	3.85185	4.25063	-0.24264	0.808288	0.999748
chr11	69560785	69562667	2552	771	NA	NA	5.46115	5.28389	5.76661	5.01599	5.38191	0.02654	0.978823	0.999748
chr11	69579780	69581529	2555	773	NA	NA	5.1423	4.5714	5.29671	4.66205	4.91812	0.17322	0.862479	0.999748
chr11	69632437	69633651	2557	774	NA	NA	6.61046	5.40372	6.70833	5.45534	6.04446	0.10566	0.915852	0.999748
chr11	69662303	69663273	2560	775	NA	NA	5.39851	4.76286	5.6355	4.42477	5.05541	-0.07146	0.943032	0.999748
chr11	69670581	69671636	2561	776	NA	NA	4.663	3.23808	4.94459	4.14063	4.24657	0.83701	0.402606	0.999748
chr11	69671912	69672920	2562	776	NA	NA	5.91349	5.22002	6.2336	5.22789	5.64875	0.23184	0.816669	0.999748
chr11	69681689	69682258	2563	777	NA	NA	5.19239	4.08977	4.85312	3.64602	4.44533	-0.55348	0.579947	0.999748
chr11	69758053	69759666	2564	778	NA	NA	6.99618	6.42957	7.03922	5.74077	6.55143	-0.45646	0.648071	0.999748
chr11	69799945	69801470	NA	779	NA	NA	4.34642	4.01647	5.57953	4.7675	4.67748	1.4025	0.160797	0.999748
chr11	69846075	69846893	2568	780	NA	NA	4.73237	4.28967	5.27925	4.24169	4.63574	0.35264	0.724363	0.999748
chr11	69900671	69901888	2572	781	NA	NA	6.12172	5.1532	6.26055	5.41263	5.73703	0.28151	0.778327	0.999748
chr11	69919855	69920751	2575	783	NA	NA	4.43231	3.23808	4.53776	3.40585	3.9035	0.19313	0.846865	0.999748
chr11	69920970	69922039	2575	784	NA	NA	6.90147	6.41538	7.29522	5.79166	6.60093	-0.16256	0.870868	0.999748
chr11	69935368	69935943	2576	785	NA	NA	5.35518	2.95388	5.1507	4.24169	4.42536	0.76576	0.44384	0.999748
chr11	69980068	69981541	2579	786	NA	NA	6.24553	5.6417	6.81519	5.65176	6.08854	0.40978	0.681975	0.999748
chr11	69990953	69991656	2580	787	NA	NA	4.95184	5.08313	4.82932	4.03195	4.72406	-0.82963	0.406768	0.999748
chr11	69995327	69996475	2581	788	NA	NA	6.28069	5.43219	6.22451	5.17776	5.77879	-0.21955	0.826225	0.999748
chr11	69999758	70000846	2583	789	NA	NA	4.79856	4.46522	5.07175	3.85185	4.54684	-0.24045	0.809986	0.999748
chr11	70020622	70022011	2587	791	NA	NA	6.19727	5.71303	6.74059	5.09914	5.93751	-0.04988	0.960216	0.999748
chr11	70220740	70221589	2591	792	NA	NA	4.95184	3.85764	5.47603	4.54828	4.70845	0.8587	0.390525	0.999748
chr11	70239423	70240200	2593	793	NA	NA	4.20715	4.35059	4.56684	3.91442	4.25975	-0.05407	0.956881	0.999748
chr11	70409645	70410348	2595	794	NA	NA	4.39	3.93924	5.0919	4.46713	4.47207	0.86928	0.384716	0.999748
chr11	70432090	70433315	2596	795	NA	NA	6.12172	5.34505	6.64156	5.80823	5.97914	0.69485	0.487166	0.999748
chr11	70451812	70452450	2597	796	NA	NA	5.41969	4.35059	5.50636	4.7332	5.00246	0.33171	0.740113	0.999748
chr11	70562355	70563819	2600	797	NA	NA	6.12172	5.34505	5.95437	5.32321	5.68609	-0.13373	0.893616	0.999748
chr11	70653597	70655887	2603	799	NA	NA	5.57882	5.00948	5.85177	5.39079	5.45771	0.46247	0.643756	0.999748
chr11	70656008	70657280	NA	799	NA	NA	4.47341	4.89143	5.0306	4.38113	4.69414	0.03314	0.973562	0.999748
chr11	70668240	70670103	2605	800	NA	NA	7.5123	6.88572	7.60308	6.40652	7.1019	-0.27456	0.783664	0.999748
chr11	70687235	70688586	2606	801	NA	NA	4.76584	4.46522	5.27925	4.66205	4.79309	0.50203	0.615655	0.999748
chr11	71018936	71019979	2613	802	NA	NA	6.80011	6.21699	6.95374	5.88834	6.46479	-0.12371	0.901544	0.999748
chr11	72041894	72043055	2617	803	NA	NA	4.51337	4.46522	5.59373	4.92774	4.87502	1.09059	0.275482	0.999748
chr11	72206355	72207787	2619	804	NA	NA	5.54065	4.15953	5.27925	4.38113	4.84014	-0.02813	0.977556	0.999748
chr11	72361597	72362134	NA	805	NA	NA	3.53694	2.38341	4.05368	3.71794	3.42299	1.30858	0.190708	0.999748
chr11	72606769	72608632	2626	806	NA	NA	6.30366	4.76286	6.40442	5.7234	5.79859	0.75018	0.453162	0.999748
chr11	72795362	72796560	2628	807	NA	NA	5.50145	4.01647	5.33101	4.38113	4.80752	0.13729	0.890802	0.999748
chr11	73176659	73178295	2634	808	NA	NA	6.30366	5.187	6.42838	5.79166	5.92768	0.51557	0.606169	0.999748
chr11	74648904	74649651	2638	809	NA	NA	5.16756	3.77115	4.92226	4.24169	4.52567	0.15921	0.873507	0.999748
chr11	74723289	74724738	2639	811	NA	NA	6.20949	4.76286	6.36357	5.41263	5.68714	0.5682	0.56991	0.999748
chr11	74829726	74831352	2641	814	NA	NA	6.95324	6.40105	6.92595	5.96424	6.56112	-0.32805	0.74288	0.999748
chr11	74831647	74833103	2641	814	NA	NA	6.59192	6.21699	6.89188	5.32321	6.256	-0.41974	0.674685	0.999748
chr11	74837564	74838747	2643	815	NA	NA	5.7724	5.00948	5.79146	5.04424	5.40439	0.03804	0.969654	0.999748
chr11	74925538	74926365	2646	816	NA	NA	5.73908	4.01647	5.59373	3.57032	4.7299	-0.41811	0.675878	0.999748
chr11	75147227	75148026	2648	817	NA	NA	5.31051	4.01647	4.72998	4.08731	4.53607	-0.36027	0.718652	0.999748
chr11	75460107	75461900	2660	818	NA	NA	6.7084	6.40105	7.03922	5.75793	6.47665	-0.22075	0.825291	0.999748
chr11	75531350	75532321	2665	819	NA	NA	5.63424	4.89143	5.56519	4.7675	5.21459	-0.13641	0.891499	0.999748
chr11	75630599	75631217	2669	820	NA	NA	4.92246	4.22607	5.07175	4.46713	4.67185	0.27592	0.782614	0.999748
chr11	75678801	75679926	2673	821	NA	NA	5.75584	3.23808	5.39727	4.98717	4.84459	0.98289	0.325684	0.999748
chr11	75732562	75733366	2674	822	NA	NA	5.35518	4.08977	5.1507	4.54828	4.78598	0.17957	0.857497	0.999748
chr11	76255944	76256389	2683	823	NA	NA	4.053	3.67915	3.73292	2.75689	3.55549	-0.87815	0.379886	0.999748
chr11	76406717	76407386	2685	827	NA	NA	5.0904	4.46522	4.78051	4.58721	4.73083	-0.13281	0.894343	0.999748
chr11	76429816	76430421	2686	828	NA	NA	4.73237	3.67915	4.20931	3.91442	4.13381	-0.20342	0.83881	0.999748
chr11	76494446	76495835	2690	829	NA	NA	5.19239	4.15953	4.98823	4.98717	4.83183	0.44071	0.659433	0.999748
chr11	76525484	76526245	2691	830	NA	NA	4.34642	3.67915	4.47778	3.316	3.95484	-0.16383	0.869866	0.999748
chr11	76570580	76571917	NA	831	NA	NA	4.43231	3.77115	5.18861	4.19204	4.39603	0.8321	0.405371	0.999748
chr11	76647292	76647711	2694	832	NA	NA	4.30147	3.67915	4.09419	3.00706	3.77047	-0.62159	0.534227	0.999748
chr11	76945373	76946159	2697	834	NA	NA	4.34642	3.23808	4.96658	3.316	3.96677	0.49344	0.621711	0.999748
chr11	77215775	77216300	2699	836	NA	NA	4.39	2.78759	3.8792	3.85185	3.72716	0.39121	0.69565	0.999748
chr11	77216509	77216873	NA	836	NA	NA	3.28322	2.129	3.62646	2.6134	2.91302	0.58502	0.558549	0.999748
chr11	77492686	77493237	2703	837	NA	NA	4.6981	4.15953	4.4152	3.97438	4.3118	-0.33084	0.740771	0.999748
chr11	77685847	77686397	2711	838	NA	NA	5.1423	4.5714	5.00957	3.85185	4.64378	-0.60243	0.546898	0.999748
chr11	77686660	77687627	NA	838	NA	NA	3.68426	3.23808	4.92226	3.91442	3.93975	1.35316	0.176036	0.999748
chr11	77981681	77983040	2718	840	NA	NA	6.37046	5.66587	6.65517	5.32321	6.00368	-0.04096	0.967328	0.999748
chr11	77983849	77984947	NA	842	NA	NA	4.15758	3.67915	4.89958	3.85185	4.14704	0.64657	0.517927	0.999748
chr11	78031891	78032803	2719	843	NA	NA	5.44057	3.93924	5.50636	4.46713	4.83832	0.41965	0.674752	0.999748
chr11	78115204	78115928	2722	844	NA	NA	4.95184	4.807	5.59373	4.80101	5.03839	0.44948	0.653098	0.999748
chr11	78162536	78164383	2723	845	NA	NA	5.50145	4.84984	5.85177	4.50828	5.17783	0.0062	0.995057	0.999748
chr11	78177701	78179213	2726	846	NA	NA	5.63424	5.22002	6.22451	5.25232	5.58277	0.44006	0.659903	0.999748
chr11	78188247	78189823	2728	847	NA	NA	5.50145	4.89143	5.88679	5.36861	5.41207	0.60968	0.542091	0.999748
chr11	78245675	78246302	2729	848	NA	NA	4.79856	3.85764	4.80512	3.49042	4.23794	-0.25493	0.798785	0.999748
chr11	78261462	78262136	2730	849	NA	NA	5.28765	3.36162	5.2072	3.57032	4.3567	0.09066	0.927768	0.999748
chr11	78535540	78536860	2739	850	NA	NA	5.70497	5.25231	5.95437	5.09914	5.5027	0.06801	0.945776	0.999748
chr11	79339186	79340100	2746	853	NA	NA	5.2168	4.40904	5.59373	4.33613	4.88893	0.21489	0.829857	0.999748
chr11	79703643	79705327	2749	854	NA	NA	5.52118	5.1532	6.17815	5.45534	5.57697	0.67795	0.497822	0.999748
chr11	79992502	79993636	2753	855	NA	NA	6.28069	5.08313	6.27824	5.65176	5.82345	0.40021	0.689012	0.999748
chr11	81385608	81386145	NA	856	NA	NA	3.81792	3.77115	3.83207	2.75689	3.54451	-0.70694	0.479623	0.999748
chr11	81449371	81449790	2764	857	NA	NA	4.39	4.08977	4.012	2.45405	3.73645	-1.42341	0.154648	0.999748
chr11	81982080	81982890	2767	858	NA	NA	4.55226	4.6217	5.33101	4.14063	4.6614	0.21042	0.833348	0.999748
chr11	84179085	84180379	2786	859	NA	NA	6.2216	5.11859	6.69522	5.49682	5.88306	0.60213	0.547099	0.999748
chr11	84869686	84871337	2796	860	NA	NA	5.91349	4.76286	6.18754	5.07195	5.48396	0.4122	0.680205	0.999748
chr11	84916105	84916542	2798	861	NA	NA	4.053	2.78759	4.17195	3.316	3.58214	0.45759	0.647256	0.999748
chr11	85139701	85140488	2799	862	NA	NA	5.75584	4.46522	5.85177	4.62512	5.17449	0.18084	0.856499	0.999748
chr11	85829728	85830156	2806	867	NA	NA	4.15758	2.59961	3.78335	3.49042	3.50774	0.36515	0.715006	0.999748
chr11	85832169	85832897	2808	868	NA	NA	4.73237	3.36162	4.62329	3.97438	4.17291	0.35604	0.721822	0.999748
chr11	85843207	85845142	2811	870	NA	NA	5.46115	5.22002	5.72851	5.25232	5.4155	0.21182	0.832255	0.999748
chr11	85875788	85876821	2813	871	NA	NA	5.88331	5.22002	5.96533	4.66205	5.43268	-0.33643	0.736556	0.999748
chr11	85917194	85917620	2815	872	NA	NA	3.61248	4.22607	3.73292	2.75689	3.58209	-0.95336	0.340433	0.999748
chr11	85917825	85918510	2815	872	NA	NA	4.663	3.67915	4.20931	3.49042	4.01047	-0.45409	0.649776	0.999748
chr11	86200850	86201633	2817	873	NA	NA	5.57882	4.46522	5.18861	4.46713	4.92494	-0.27447	0.783729	0.999748
chr11	86544350	86545239	2823	874	NA	NA	5.03656	4.5714	5.6355	4.28968	4.88329	0.22423	0.822586	0.999748
chr11	86570241	86570528	2824	876	NA	NA	3.53694	3.93924	3.57013	3.00706	3.51334	-0.63545	0.525147	0.999748
chr11	86757115	86758336	2826	877	NA	NA	6.45498	5.71303	6.62092	5.65176	6.11017	0.07398	0.941025	0.999748
chr11	86969285	86969655	2828	878	NA	NA	3.68426	3.58087	3.68067	2.75689	3.42567	-0.58497	0.558584	0.999748
chr11	87426497	87428117	2837	879	NA	NA	6.01441	6.23326	6.34691	4.66205	5.81416	-0.87559	0.381274	0.999748
chr11	87442703	87444313	2838	880	NA	NA	6.06907	5.94801	6.43628	5.20305	5.9141	-0.26701	0.789466	0.999748
chr11	87986969	87987908	2848	881	NA	NA	5.44057	3.58087	5.18861	4.46713	4.66929	0.44836	0.653903	0.999748
chr11	88047211	88048500	2849	883	NA	NA	6.09564	5.25231	5.80372	4.86576	5.50436	-0.47957	0.631543	0.999748
chr11	88067802	88068357	2850	884	NA	NA	4.92246	3.10297	4.34978	3.78645	4.04041	0.07832	0.937573	0.999748
chr11	88068821	88069084	2850	884	NA	NA	3.18766	2.59961	3.24985	3.00706	3.01104	0.33196	0.739925	0.999748
chr11	88161149	88161487	NA	885	NA	NA	2.58294	3.36162	3.96907	2.88739	3.20025	0.64459	0.519211	0.999748
chr11	88161781	88162328	2854	886	NA	NA	3.75264	3.67915	4.65072	3.64602	3.93213	0.61139	0.540953	0.999748
chr11	88181060	88181739	2856	887	NA	NA	4.25508	4.01647	4.67763	3.57032	4.12987	-0.01669	0.986686	0.999748
chr11	88718254	88719106	2865	891	NA	NA	4.47341	3.36162	4.89958	4.46713	4.30043	1.08267	0.278979	0.999748
chr11	88863504	88865100	2866	892	NA	NA	5.68761	4.51929	6.05014	4.7332	5.24756	0.40746	0.683678	0.999748
chr11	90249029	90249823	2878	893	NA	NA	5.83681	4.51929	6.29572	5.27634	5.48204	0.8595	0.390085	0.999748
chr11	93884753	93886364	2884	894	NA	NA	6.71698	5.6417	7.01304	5.77489	6.28665	0.30343	0.761572	0.999748
chr11	93886632	93887115	NA	894	NA	NA	3.45722	2.59961	4.012	2.6134	3.17056	0.40189	0.687773	0.999748
chr11	94138315	94139052	NA	895	NA	NA	3.45722	3.23808	4.20931	3.78645	3.67277	0.91924	0.357995	0.999748
chr11	94210240	94212287	2889	896	NA	NA	7.01021	6.07979	7.54946	6.32825	6.74193	0.55679	0.577685	0.999748
chr11	94242973	94243622	2890	897	NA	NA	4.15758	4.08977	4.31593	3.316	3.96982	-0.43501	0.663565	0.999748
chr11	94246061	94247012	2891	898	NA	NA	4.51337	4.35059	4.67763	3.85185	4.34836	-0.23644	0.813099	0.999748
chr11	94327839	94328520	2893	899	NA	NA	4.62702	4.08977	4.80512	4.19204	4.42849	0.19818	0.842907	0.999748
chr11	94470733	94471166	NA	901	NA	NA	3.45722	3.4754	3.62646	2.75689	3.32899	-0.38826	0.697834	0.999748
chr11	94473610	94475261	2898	902	NA	NA	5.50145	4.807	5.77909	4.80101	5.22214	0.19201	0.847739	0.999748
chr11	94601541	94602194	2902	903	NA	NA	4.47341	4.08977	4.70404	4.14063	4.35196	0.19897	0.842289	0.999748
chr11	94880783	94882498	2909	904	NA	NA	5.44057	4.807	5.68938	4.69807	5.15875	0.09887	0.921243	0.999748
chr11	94928821	94929349	2910	905	NA	NA	4.79856	4.67031	4.87654	4.19204	4.63436	-0.28294	0.77723	0.999748
chr11	94989572	94989974	2913	906	NA	NA	4.51337	3.58087	3.96907	3.91442	3.99443	-0.14897	0.881579	0.999748
chr11	94990526	94993646	2914	907	NA	NA	5.86797	5.187	6.18754	5.22789	5.6176	0.25479	0.798888	0.999748
chr11	95009638	95009959	2915	908	NA	NA	3.81792	3.23808	3.57013	3.00706	3.4083	-0.33845	0.735031	0.999748
chr11	95010236	95010546	NA	908	NA	NA	2.58294	1.81992	3.57013	2.88739	2.71509	1.45235	0.146437	0.999748
chr11	95384329	95385148	2934	909	NA	NA	5.85248	5.54074	5.87521	4.95776	5.55655	-0.39601	0.692103	0.999748
chr11	95413817	95415003	2935	910	NA	NA	5.48144	4.97119	5.22555	4.58721	5.06635	-0.45229	0.651069	0.999748
chr11	95712383	95713318	2948	911	NA	NA	5.28765	3.58087	4.72998	4.14063	4.43478	0.00148	0.998818	0.999748
chr11	95990883	95991804	2952	912	NA	NA	4.86184	4.51929	5.5213	3.78645	4.67222	-0.05187	0.958633	0.999748
chr11	96005710	96007616	2954	914	NA	NA	5.85248	5.08313	6.1496	4.89709	5.49557	0.07852	0.937417	0.999748
chr11	96284183	96285159	NA	916	NA	NA	3.94024	3.4754	4.72998	3.85185	3.99937	0.82433	0.409774	0.999748
chr11	96318586	96319627	2962	919	NA	NA	4.83054	4.35059	4.85312	4.42477	4.61476	0.06839	0.945474	0.999748
chr11	96319832	96320083	2962	919	NA	NA	3.28322	3.10297	3.57013	2.75689	3.1783	-0.04182	0.96664	0.999748
chr11	96333124	96333626	NA	921	NA	NA	2.97516	3.4754	3.57013	2.88739	3.22702	0.00492	0.996076	0.999748
chr11	96340959	96341408	2964	922	NA	NA	3.18766	4.01647	4.09419	3.00706	3.57634	-0.07272	0.942028	0.999748
chr11	96352934	96353507	2967	924	NA	NA	4.053	3.36162	3.96907	2.88739	3.56777	-0.39453	0.693197	0.999748
chr11	96823719	96824786	2971	925	NA	NA	5.11658	4.5714	5.38099	4.24169	4.82767	-0.04616	0.963183	0.999748
chr11	96829403	96830591	2972	927	NA	NA	6.52507	5.56665	6.77215	5.79166	6.16388	0.33369	0.738618	0.999748
chr11	96875894	96876102	NA	928	NA	NA	3.08532	2.59961	3.24985	2.6134	2.88704	0.12604	0.899699	0.999748
chr11	97041352	97041828	2982	929	NA	NA	4.30147	4.08977	4.13359	3.64602	4.04271	-0.43234	0.665507	0.999748
chr11	97150034	97151110	2985	930	NA	NA	5.33302	3.58087	5.26157	4.62512	4.70014	0.68763	0.491703	0.999748
chr11	97186762	97188947	2986	933	NA	NA	7.49743	6.57707	7.70796	6.62803	7.10262	0.18484	0.85336	0.999748
chr11	97280180	97280381	2987	934	NA	NA	3.88038	1.42604	3.31984	2.45405	2.77008	0.33044	0.741076	0.999748
chr11	97661777	97662597	3005	935	NA	NA	4.59013	4.15953	4.24573	4.19204	4.29686	-0.22045	0.825524	0.999748
chr11	97663270	97663471	3006	936	NA	NA	3.28322	1.42604	3.17628	3.316	2.80038	1.26034	0.207578	0.999748
chr11	97663916	97664346	NA	937	NA	NA	3.61248	3.36162	3.78335	2.27488	3.25808	-0.64738	0.5174	0.999748
chr11	97702166	97703823	3009	938	NA	NA	5.7724	5.5921	5.97621	5.39079	5.68287	0.00176	0.998594	0.999748
chr11	97733766	97734255	3010	939	NA	NA	4.053	3.77115	4.44683	2.75689	3.75697	-0.43855	0.660994	0.999748
chr11	97798880	97800751	3012	941	NA	NA	5.7724	4.89143	5.80372	5.07195	5.38488	0.14974	0.880971	0.999748
chr11	97840877	97841292	NA	942	NA	NA	3.61248	3.36162	3.8792	2.88739	3.43517	-0.14668	0.88339	0.999748
chr11	98149291	98150659	3018	943	NA	NA	5.50145	4.08977	5.50636	4.54828	4.91147	0.32758	0.743238	0.999748
chr11	98357709	98358701	3025	944	NA	NA	4.663	4.40904	5.0919	4.14063	4.57614	0.11344	0.909686	0.999748
chr11	98586931	98587606	3031	945	NA	NA	4.79856	4.08977	4.85312	3.78645	4.38197	-0.17583	0.86043	0.999748
chr11	98587822	98588030	NA	945	NA	NA	2.58294	2.38341	3.01683	1.83176	2.45373	-0.08324	0.933666	0.999748
chr11	98794728	98796986	3041	947	NA	NA	6.18495	4.84984	6.33004	5.63328	5.74953	0.65633	0.511624	0.999748
chr11	98809573	98810198	3042	948	NA	NA	5.616	4.5714	5.66269	4.42477	5.06872	-0.07065	0.94368	0.999748
chr11	98863326	98864355	3044	949	NA	NA	5.377	4.84984	5.5213	4.62512	5.09331	-0.05685	0.954666	0.999748
chr11	98907622	98908069	3045	950	NA	NA	4.6981	4.15953	4.53776	3.57032	4.24143	-0.52982	0.596245	0.999748
chr11	98922555	98923195	NA	951	NA	NA	4.053	3.58087	4.05368	3.22019	3.72693	-0.25447	0.79914	0.999748
chr11	98925224	98925511	3046	952	NA	NA	3.61248	3.10297	3.3866	2.07027	3.04308	-0.88963	0.373688	0.999748
chr11	98925752	98926352	3046	952	NA	NA	4.79856	4.5714	4.59534	2.45405	4.10484	-1.6403	0.100974	0.999748
chr11	98936030	98936990	3048	953	NA	NA	4.47341	4.08977	4.70404	3.64602	4.22831	-0.15065	0.880257	0.999748
chr11	98937297	98938596	3049	954	NA	NA	5.28765	4.35059	5.46062	4.28968	4.84714	0.07921	0.936869	0.999748
chr11	98940744	98942641	3051	955	NA	NA	5.24081	5.187	5.57953	4.42477	5.10803	-0.29936	0.764674	0.999748
chr11	98959441	98960274	3053	956	NA	NA	4.053	3.67915	4.50808	3.64602	3.97156	0.29826	0.76551	0.999748
chr11	98962400	98964551	3054	957	NA	NA	5.31051	5.28389	5.85177	4.98717	5.35834	0.17285	0.862772	0.999748
chr11	99039863	99041773	3058	958	NA	NA	5.59753	4.6217	5.92097	4.86576	5.25149	0.40114	0.688325	0.999748
chr11	99055358	99056332	3059	959	NA	NA	5.92835	5.66587	5.27925	3.57032	5.11094	-1.94006	0.0524002	0.999748
chr11	99071566	99071928	NA	960	NA	NA	3.18766	3.58087	3.45041	2.27488	3.12345	-0.73742	0.460887	0.999748
chr11	99132107	99132637	NA	962	NA	NA	3.08532	2.78759	4.4152	2.75689	3.26125	0.91833	0.358469	0.999748
chr11	99134671	99135150	NA	963	NA	NA	3.18766	2.59961	3.96907	3.11755	3.21847	0.91846	0.358403	0.999748
chr11	99147284	99147788	NA	964	NA	NA	3.45722	2.129	3.92483	1.83176	2.83571	0.12043	0.904146	0.999748
chr11	99230431	99231172	3060	965	NA	NA	4.43231	3.58087	4.65072	4.19204	4.21398	0.58639	0.557625	0.999748
chr11	100319617	100320769	3063	966	NA	NA	6.2216	4.67031	6.62092	5.63328	5.78652	0.96293	0.335605	0.999748
chr11	100413946	100415384	3068	967	NA	NA	5.41969	4.67031	5.83991	4.69807	5.15699	0.31665	0.751512	0.999748
chr11	100618915	100620194	3072	969	NA	NA	5.50145	5.04677	5.89827	4.83375	5.32006	0.12992	0.896632	0.999748
chr11	101082266	101083090	3082	970	NA	NA	4.98064	4.28967	4.87654	4.19204	4.58472	-0.14259	0.886615	0.999748
chr11	101119514	101120842	3085	971	NA	NA	5.98629	4.97119	6.01892	5.09914	5.51889	0.1135	0.909633	0.999748
chr11	101315728	101317173	3092	972	NA	NA	5.377	4.35059	5.39727	4.66205	4.94673	0.23448	0.814617	0.999748
chr11	101626746	101628417	3099	974	NA	NA	6.00042	5.25231	5.90967	4.24169	5.35102	-0.77851	0.436286	0.999748
chr11	101641279	101642491	3100	975	NA	NA	5.06373	5.22002	5.57953	4.54828	5.10289	-0.11023	0.91223	0.999748
chr11	101645223	101645432	3101	976	NA	NA	4.39	3.36162	3.24985	2.07027	3.26793	-1.71872	0.0856973	0.999748
chr11	101657809	101659305	3102	977	NA	NA	6.5541	6.65159	6.82124	5.51712	6.38601	-0.61307	0.539841	0.999748
chr11	101772165	101772890	3106	978	NA	NA	4.92246	4.46522	5.18861	4.33613	4.72811	0.09688	0.92282	0.999748
chr11	101784694	101785734	3107	979	NA	NA	5.24081	4.67031	5.26157	4.03195	4.80116	-0.43655	0.662449	0.999748
chr11	102026524	102027410	3113	980	NA	NA	4.30147	3.93924	5.18861	4.54828	4.4944	1.05758	0.290271	0.999748
chr11	102087399	102089647	3115	983	NA	NA	5.57882	5.4601	5.87521	5.07195	5.49652	-0.06486	0.948286	0.999748
chr11	102184783	102185354	3116	984	NA	NA	5.06373	2.95388	4.4152	3.40585	3.95966	-0.13894	0.889501	0.999748
chr11	102229893	102230587	3122	987	NA	NA	5.31051	3.85764	5.13137	3.97438	4.56848	-0.04411	0.964814	0.999748
chr11	102248735	102249165	3123	988	NA	NA	4.59013	4.22607	4.17195	3.57032	4.13962	-0.75911	0.447805	0.999748
chr11	102316440	102318689	3128	989	NA	NA	5.78877	4.22607	6.07059	4.86576	5.2378	0.65137	0.51482	0.999748
chr11	102406951	102408070	3132	990	NA	NA	5.44057	4.08977	5.33101	4.62512	4.87162	0.30097	0.76344	0.999748
chr11	102408393	102408968	3132	991	NA	NA	5.16756	4.71733	5.1507	3.78645	4.70551	-0.66991	0.50293	0.999748
chr11	102603574	102605359	3142	993	NA	NA	6.12172	5.3148	6.03981	5.43414	5.72762	0.02646	0.978893	0.999748
chr11	102624276	102624515	3143	995	NA	NA	4.053	3.67915	3.45041	2.07027	3.3132	-1.56318	0.118042	0.999748
chr11	102624734	102625147	NA	995	NA	NA	3.08532	2.59961	3.57013	3.00706	3.06553	0.6307	0.528253	0.999748
chr11	102697594	102697940	3144	996	NA	NA	3.75264	3.10297	3.62646	2.27488	3.18924	-0.67452	0.499995	0.999748
chr11	102773812	102775360	3145	997	NA	NA	5.55986	5.68964	5.83991	5.09914	5.54714	-0.21945	0.826308	0.999748
chr11	102819252	102819805	3146	998	NA	NA	4.053	3.23808	4.44683	3.91442	3.91308	0.75645	0.449396	0.999748
chr11	102880725	102881244	3147	999	NA	NA	4.62702	3.36162	4.09419	3.00706	3.77247	-0.62726	0.530505	0.999748
chr11	102924858	102925461	3149	1000	NA	NA	4.663	3.4754	4.38286	3.64602	4.04182	-0.07742	0.938293	0.999748
chr11	103016936	103017241	NA	1001	NA	NA	3.45722	1.81992	3.78335	3.57032	3.1577	1.4678	0.142191	0.999748
chr11	103028047	103028870	3152	1002	NA	NA	6.08241	5.73605	5.88679	4.66205	5.59182	-0.89743	0.369509	0.999748
chr11	103267077	103268106	3162	1003	NA	NA	6.78386	6.06169	7.12969	5.75793	6.43329	0.02974	0.976272	0.999748
chr11	103697412	103698154	3166	1004	NA	NA	4.51337	4.01647	5.0306	4.14063	4.42527	0.45337	0.650296	0.999748
chr11	104289426	104289995	3174	1005	NA	NA	4.73237	3.85764	4.67763	3.91442	4.29551	0.00143	0.998856	0.999748
chr11	104441628	104443030	3178	1006	NA	NA	5.75584	4.40904	6.13996	4.83375	5.28465	0.57172	0.567524	0.999748
chr11	105180742	105182322	3185	1007	NA	NA	5.82098	4.28967	5.87521	4.62512	5.15274	0.27544	0.782982	0.999748
chr11	105291746	105292984	3186	1009	NA	NA	5.11658	4.01647	5.27925	4.7332	4.78637	0.62161	0.534214	0.999748
chr11	105589242	105590483	3189	1010	NA	NA	5.73908	4.93186	5.76661	4.50828	5.23646	-0.27996	0.779517	0.999748
chr11	106159140	106161470	3197	1012	NA	NA	6.06907	5.37468	6.20614	5.67	5.82997	0.30564	0.759885	0.999748
chr11	106216094	106217309	3200	1013	NA	NA	6.26906	5.7587	6.36357	5.47623	5.96689	-0.13286	0.894306	0.999748
chr11	106268791	106269301	3202	1015	NA	NA	3.75264	3.36162	3.8792	3.316	3.57736	0.05722	0.954372	0.999748
chr11	106272152	106273461	3203	1016	NA	NA	6.35954	5.40372	6.44414	5.27634	5.87094	-0.03024	0.975876	0.999748
chr11	106787433	106789594	3210	1018	NA	NA	7.05151	5.94801	7.20098	6.10502	6.57638	0.21664	0.828496	0.999748
chr11	106919732	106921129	3211	1019	NA	NA	5.57882	3.85764	5.46062	4.83375	4.93271	0.60641	0.544256	0.999748
chr11	107012448	107012940	3213	1020	NA	NA	4.92246	4.08977	4.92226	3.91442	4.46223	-0.12409	0.901245	0.999748
chr11	107131276	107131640	3216	1021	NA	NA	3.94024	3.10297	4.09419	3.40585	3.63581	0.32291	0.74677	0.999748
chr11	107132099	107132999	3217	1022	NA	NA	4.39	3.36162	4.67763	4.28968	4.17973	0.85932	0.390187	0.999748
chr11	107470122	107471191	3220	1023	NA	NA	4.73237	4.807	4.89958	3.49042	4.48234	-0.81243	0.416562	0.999748
chr11	107546684	107548519	3222	1024	NA	NA	5.59753	4.51929	5.81589	5.39079	5.33087	0.77037	0.4411	0.999748
chr11	108920192	108921349	3231	1025	NA	NA	6.28069	5.28389	5.86354	5.12583	5.63849	-0.40659	0.684317	0.999748
chr11	108921623	108922842	NA	1025	NA	NA	4.30147	3.58087	4.85312	3.49042	4.05647	0.32601	0.744425	0.999748
chr11	108947089	108948138	3234	1026	NA	NA	5.63424	4.76286	5.66269	4.03195	5.02294	-0.49654	0.619527	0.999748
chr11	109269259	109270758	3237	1027	NA	NA	4.83054	4.51929	5.29671	4.66205	4.82715	0.43042	0.666896	0.999748
chr11	109362198	109363665	3239	1028	NA	NA	5.78877	3.58087	5.68938	5.04424	5.02582	0.96413	0.335003	0.999748
chr11	109425365	109426444	3240	1029	NA	NA	6.53481	5.28389	7.27774	5.97895	6.26885	1.01645	0.309442	0.999748
chr11	109472315	109474257	3242	1030	NA	NA	5.377	3.67915	5.64916	4.95776	4.91577	1.09617	0.273032	0.999748
chr11	112649091	112649367	3262	1037	NA	NA	4.51337	4.35059	3.62646	1.83176	3.58055	-2.40736	0.0160864	0.999748
chr11	113014395	113014864	3267	1038	NA	NA	4.76584	4.89143	4.24573	2.75689	4.16497	-1.87645	0.0606228	0.999748
chr11	113683504	113684857	3276	1039	NA	NA	6.18495	4.67031	6.05014	4.98717	5.47314	0.12868	0.897611	0.999748
chr11	113710013	113710830	NA	1040	NA	NA	3.28322	3.4754	4.62329	3.97438	3.83907	1.29994	0.193652	0.999748
chr11	113749925	113752335	3278	1043	NA	NA	6.24553	5.7587	6.45973	5.80823	6.06805	0.18642	0.85212	0.999748
chr11	113785085	113786091	3279	1044	NA	NA	5.50145	5.68964	5.6355	4.58721	5.35345	-0.6845	0.493675	0.999748
chr11	114567021	114567287	3288	1045	NA	NA	4.43231	3.36162	3.51151	2.07027	3.34393	-1.56366	0.117929	0.999748
chr11	115403534	115404075	3300	1047	NA	NA	4.43231	3.93924	4.13359	3.316	3.95529	-0.65169	0.514619	0.999748
chr11	115419588	115420414	3302	1048	NA	NA	5.11658	4.15953	5.27925	4.58721	4.78564	0.41729	0.676474	0.999748
chr11	115564142	115564610	3307	1049	NA	NA	4.79856	4.22607	4.34978	3.91442	4.32221	-0.53751	0.590928	0.999748
chr11	115708356	115709483	3311	1050	NA	NA	5.50145	4.67031	5.44504	4.89709	5.12847	0.12043	0.904148	0.999748
chr11	115813012	115815360	3314	1051	NA	NA	6.10874	5.54074	6.68199	5.99352	6.08125	0.72525	0.468313	0.999748
chr11	116012184	116013164	3320	1052	NA	NA	4.59013	4.15953	5.0306	4.69807	4.61958	0.69202	0.488943	0.999748
chr11	116030037	116031085	3322	1053	NA	NA	5.7724	4.71733	5.80372	4.46713	5.19014	-0.15471	0.877051	0.999748
chr11	116198664	116199404	3331	1054	NA	NA	5.377	4.01647	5.47603	4.42477	4.82357	0.3586	0.719899	0.999748
chr11	116418278	116418546	NA	1055	NA	NA	3.37284	3.36162	3.24985	2.75689	3.1853	-0.51439	0.606988	0.999748
chr11	116842525	116843894	3361	1056	NA	NA	6.2216	4.89143	6.38822	5.29997	5.70031	0.40655	0.684348	0.999748
chr11	116852521	116854225	3362	1057	NA	NA	6.57313	4.93186	6.64838	5.47623	5.9074	0.43797	0.661415	0.999748
chr11	117114567	117115805	3366	1058	NA	NA	5.63424	4.35059	5.72851	5.20305	5.2291	0.66919	0.503388	0.999748
chr11	117265509	117267627	3369	1060	NA	NA	6.20949	5.4601	6.40442	5.49682	5.89271	0.16374	0.869938	0.999748
chr11	117319784	117320642	NA	1061	NA	NA	4.10623	4.08977	4.38286	3.316	3.97372	-0.3514	0.725293	0.999748
chr11	117497276	117498332	3380	1063	NA	NA	4.73237	5.48748	5.16978	3.11755	4.6268	-1.36601	0.171968	0.999748
chr11	117654037	117656048	3382	1064	NA	NA	6.59192	5.3148	6.51299	5.47623	5.97398	0.05832	0.953494	0.999748
chr11	117779116	117781268	3384	1065	NA	NA	5.39851	5.28389	5.88679	5.17776	5.43674	0.27013	0.787069	0.999748
chr11	117824588	117826248	3389	1066	NA	NA	4.98064	4.40904	5.18861	3.97438	4.63817	-0.16024	0.872697	0.999748
chr11	117848228	117849664	3390	1067	NA	NA	5.46115	4.5714	5.81589	4.19204	5.01012	-0.0174	0.986115	0.999748
chr11	117963143	117964159	3392	1068	NA	NA	5.39851	4.40904	5.46062	4.08731	4.83887	-0.18351	0.854398	0.999748
chr11	117968796	117970423	3393	1069	NA	NA	6.00042	5.04677	6.08071	4.92774	5.51391	-0.02739	0.978153	0.999748
chr11	118239152	118239583	NA	1070	NA	NA	3.45722	3.67915	3.73292	3.22019	3.52237	-0.12953	0.896938	0.999748
chr11	118239870	118240140	NA	1070	NA	NA	2.85588	2.78759	3.3866	3.00706	3.00928	0.53027	0.595938	0.999748
chr11	118365240	118365466	NA	1071	NA	NA	2.58294	2.59961	3.45041	2.45405	2.77175	0.51028	0.609864	0.999748
chr11	118418672	118419587	3407	1072	NA	NA	5.2168	4.76286	5.27925	3.97438	4.80832	-0.5132	0.607822	0.999748
chr11	119022521	119024212	3418	1073	NA	NA	5.55986	4.67031	5.70254	4.86576	5.19962	0.23901	0.8111	0.999748
chr11	119040381	119042383	3419	1074	NA	NA	6.71698	5.187	6.9647	5.20305	6.01793	0.18645	0.852099	0.999748
chr11	119042612	119043179	3420	1075	NA	NA	4.51337	2.95388	4.13359	3.00706	3.65198	-0.23086	0.817427	0.999748
chr11	119052453	119053648	3422	1076	NA	NA	5.55986	5.00948	5.85177	4.19204	5.15329	-0.37147	0.710297	0.999748
chr11	119211750	119211968	NA	1077	NA	NA	2.42429	2.38341	2.92997	1.83176	2.39236	-0.03249	0.974082	0.999748
chr11	119228055	119229471	3436	1078	NA	NA	5.48144	4.67031	5.59373	4.50828	5.06344	-0.03516	0.971952	0.999748
chr11	119602608	119603236	3446	1079	NA	NA	3.68426	1.42604	4.47778	4.08731	3.41885	2.44204	0.014622	0.999748
chr11	120114479	120115432	3463	1080	NA	NA	4.6981	4.71733	4.89958	3.97438	4.57235	-0.38274	0.701923	0.999748
chr11	120171176	120171908	NA	1081	NA	NA	3.75264	3.36162	4.28126	3.40585	3.70034	0.40492	0.685542	0.999748
chr11	120184055	120186090	3466	1082	NA	NA	5.59753	5.04677	5.76661	4.95776	5.34217	0.05659	0.954869	0.999748
chr11	120186940	120187520	NA	1083	NA	NA	3.53694	2.78759	4.09419	3.316	3.43368	0.7674	0.44286	0.999748
chr11	120188233	120188453	NA	1083	NA	NA	2.58294	1.42604	3.17628	2.6134	2.44966	1.2587	0.20817	0.999748
chr11	120189502	120190571	3467	1085	NA	NA	5.63424	4.807	5.70254	4.95776	5.27539	0.15484	0.87695	0.999748
chr11	120216539	120216991	3468	1086	NA	NA	3.88038	3.67915	3.8792	3.49042	3.73229	-0.13423	0.893223	0.999748
chr11	120231089	120231771	3470	1089	NA	NA	4.89247	4.40904	4.98823	4.24169	4.63286	-0.0506	0.959643	0.999748
chr11	120234010	120234496	NA	1091	NA	NA	3.28322	3.58087	3.78335	3.22019	3.46691	0.09857	0.921482	0.999748
chr11	120234700	120235082	NA	1091	NA	NA	2.85588	2.129	3.62646	3.00706	2.9046	1.16534	0.24391	0.999748
chr11	120237695	120237928	3472	1094	NA	NA	3.37284	2.95388	3.24985	2.27488	2.96286	-0.56689	0.5708	0.999748
chr11	120239185	120239951	NA	1096	NA	NA	3.61248	2.59961	4.24573	3.49042	3.48706	1.0773	0.281374	0.999748
chr11	120240246	120240633	NA	1096	NA	NA	3.08532	2.59961	3.68067	2.88739	3.06325	0.62425	0.53248	0.999748
chr11	120304591	120306126	3476	1097	NA	NA	5.94305	5.40372	5.94332	4.50828	5.44959	-0.63276	0.526905	0.999748
chr11	120310660	120311447	3478	1098	NA	NA	5.16756	4.28967	5.36452	4.66205	4.87095	0.40244	0.687369	0.999748
chr11	120348005	120350958	3482	1099	NA	NA	6.43431	5.80297	6.99711	5.45534	6.17243	0.15209	0.879116	0.999748
chr11	120377962	120379128	3485	1100	NA	NA	5.39851	4.08977	5.18861	4.33613	4.75325	0.02578	0.979435	0.999748
chr11	120437416	120437716	3486	1101	NA	NA	3.53694	0	3.83207	3.78645	2.78886	2.88508	0.0039216	0.999748
chr11	120484176	120485170	3488	1102	NA	NA	4.55226	3.93924	4.78051	3.91442	4.29661	0.14379	0.885669	0.999748
chr11	120572375	120573865	3491	1103	NA	NA	7.0784	6.23326	7.37958	5.88834	6.6449	-0.03092	0.975336	0.999748
chr11	120581588	120582211	3492	1104	NA	NA	4.30147	2.59961	4.53776	3.22019	3.66476	0.60568	0.544742	0.999748
chr11	120598274	120598794	3493	1105	NA	NA	5.1423	3.10297	5.1507	4.03195	4.35698	0.6626	0.507604	0.999748
chr11	120632553	120633719	3496	1106	NA	NA	4.79856	3.85764	5.11177	3.85185	4.40495	0.2173	0.827978	0.999748
chr11	120672652	120673805	3500	1107	NA	NA	5.78877	3.77115	5.38099	4.42477	4.84142	0.17377	0.862052	0.999748
chr11	120695110	120696156	3501	1108	NA	NA	4.76584	4.46522	5.2072	4.24169	4.66999	0.15397	0.877634	0.999748
chr11	120823623	120825199	3513	1110	NA	NA	6.82414	5.5921	7.16815	5.88834	6.36818	0.45257	0.65087	0.999748
chr11	120990723	120992229	3518	1111	NA	NA	5.0904	4.71733	5.53608	4.46713	4.95273	0.13818	0.890104	0.999748
chr11	121203913	121204990	3519	1112	NA	NA	5.92835	5.187	6.27824	5.27634	5.66748	0.31048	0.756205	0.999748
chr12	3891238	3892760	3544	1113	NA	NA	5.11658	4.76286	5.6355	4.42477	4.98493	0.12782	0.898295	0.999748
chr12	4233728	4234495	3550	1114	NA	NA	5.80497	5.25231	5.99772	4.92774	5.49569	-0.09317	0.925767	0.999748
chr12	8031922	8032477	3562	1116	NA	NA	5.0904	5.22002	4.34978	3.57032	4.55763	-1.68961	0.0911348	0.999748
chr12	8673822	8674660	3567	1117	NA	NA	5.46115	4.22607	5.53608	4.38113	4.90111	0.16257	0.87086	0.999748
chr12	8803571	8803927	3570	1118	NA	NA	3.75264	2.38341	3.73292	3.22019	3.27229	0.57755	0.563584	0.999748
chr12	8847056	8847516	3571	1119	NA	NA	4.83054	4.08977	3.78335	2.75689	3.86514	-1.68237	0.0925293	0.999748
chr12	8855292	8856818	3572	1120	NA	NA	6.0556	5.8246	6.4828	5.17776	5.88519	-0.15525	0.876626	0.999748
chr12	8884597	8885232	NA	1121	NA	NA	3.37284	3.93924	4.13359	3.00706	3.61318	-0.12118	0.903553	0.999748
chr12	8921400	8922476	3573	1123	NA	NA	6.5541	5.40372	6.63471	5.59559	6.04703	0.1926	0.847275	0.999748
chr12	8973932	8974182	3575	1124	NA	NA	3.75264	2.78759	3.31984	2.75689	3.15424	-0.32762	0.743203	0.999748
chr12	9029881	9030681	3576	1125	NA	NA	5.16756	4.28967	5.55071	4.50828	4.87905	0.42535	0.670593	0.999748
chr12	10062083	10062541	3580	1127	NA	NA	3.53694	2.95388	3.83207	2.88739	3.30257	0.16161	0.871613	0.999748
chr12	10390608	10391459	3581	1128	NA	NA	5.06373	4.28967	5.34787	4.14063	4.71047	0.09549	0.923928	0.999748
chr12	11265192	11266468	3583	1129	NA	NA	5.68761	3.85764	6.21535	5.27634	5.25924	1.37585	0.1689	0.999748
chr12	12581016	12582273	3588	1130	NA	NA	5.57882	4.76286	5.53608	4.46713	5.08622	-0.23925	0.810913	0.999748
chr12	12588746	12589329	3589	1131	NA	NA	4.663	3.85764	4.44683	3.85185	4.20483	-0.15689	0.875331	0.999748
chr12	12938903	12939714	3591	1134	NA	NA	4.15758	4.08977	4.17195	3.40585	3.95629	-0.47327	0.636029	0.999748
chr12	12940799	12941277	NA	1135	NA	NA	3.68426	3.10297	3.8792	3.11755	3.44599	0.1481	0.882263	0.999748
chr12	12941603	12943351	3593	1135	NA	NA	5.377	4.97119	5.86354	5.12583	5.33439	0.45321	0.650406	0.999748
chr12	13049629	13050398	NA	1136	NA	NA	3.68426	3.67915	4.13359	3.00706	3.62601	-0.15745	0.87489	0.999748
chr12	13066695	13067435	3596	1137	NA	NA	5.88331	5.08313	4.85312	3.11755	4.73428	-2.11756	0.0342373	0.999748
chr12	13184661	13185278	3599	1141	NA	NA	5.33302	5.25231	4.96658	4.14063	4.92313	-1.04482	0.296133	0.999748
chr12	13214635	13215052	3601	1143	NA	NA	4.34642	3.67915	3.92483	2.88739	3.70945	-0.85765	0.391105	0.999748
chr12	15815844	15817392	3608	1144	NA	NA	5.80497	5.28389	5.92097	5.20305	5.55322	0.02485	0.980173	0.999748
chr12	17544183	17545358	3619	1146	NA	NA	6.39206	5.11859	6.55714	5.77489	5.96067	0.5806	0.561525	0.999748
chr12	17710093	17711110	3623	1147	NA	NA	4.663	4.5714	5.18861	4.08731	4.62758	0.02935	0.976587	0.999748
chr12	21111266	21112812	3628	1148	NA	NA	5.65225	4.807	5.76661	4.92774	5.2884	0.16618	0.868022	0.999748
chr12	21373153	21374168	3631	1149	NA	NA	5.54065	4.22607	5.93219	5.09914	5.19951	0.89389	0.371401	0.999748
chr12	24707974	24708798	3637	1150	NA	NA	5.16756	3.67915	5.55071	4.69807	4.77387	0.99105	0.321683	0.999748
chr12	24830746	24832202	3638	1151	NA	NA	6.42386	5.37468	7.10512	5.88834	6.198	0.84463	0.398335	0.999748
chr12	25095654	25096907	3641	1153	NA	NA	6.24553	5.66587	5.83991	5.17776	5.73227	-0.63173	0.527577	0.999748
chr12	25098415	25099048	3642	1155	NA	NA	5.92835	4.89143	5.31396	4.58721	5.18024	-0.64932	0.516149	0.999748
chr12	25099318	25099528	3642	1155	NA	NA	3.99772	2.95388	3.01683	2.07027	3.00967	-1.31793	0.187558	0.999748
chr12	25100798	25101178	3643	1157	NA	NA	4.30147	3.36162	3.62646	3.22019	3.62743	-0.5771	0.563883	0.999748
chr12	26533164	26533407	3647	1161	NA	NA	5.06373	4.08977	3.31984	3.49042	3.99094	-1.65632	0.0976886	0.999748
chr12	27341818	27343819	3653	1166	NA	NA	6.50539	5.54074	6.57871	5.79166	6.10412	0.22919	0.818727	0.999748
chr12	27465576	27465941	NA	1168	NA	NA	2.58294	2.78759	3.51151	2.75689	2.90973	0.63466	0.525663	0.999748
chr12	28675172	28675571	NA	1171	NA	NA	3.37284	2.95388	4.24573	3.316	3.47211	0.87297	0.382698	0.999748
chr12	28799747	28800487	3662	1172	NA	NA	5.46115	4.84984	5.13137	3.78645	4.8072	-0.98477	0.324763	0.999748
chr12	29049061	29049526	NA	1173	NA	NA	3.28322	3.36162	4.44683	3.00706	3.52468	0.57188	0.567416	0.999748
chr12	29937940	29938990	3666	1174	NA	NA	4.47341	3.85764	4.98823	4.58721	4.47663	0.8796	0.379096	0.999748
chr12	31026354	31027281	3671	1176	NA	NA	4.89247	4.71733	5.42929	3.91442	4.73838	-0.18809	0.850814	0.999748
chr12	31185554	31185826	3672	1177	NA	NA	3.53694	2.59961	3.31984	1.54586	2.75056	-0.8983	0.36905	0.999748
chr12	31350910	31351565	3676	1178	NA	NA	4.43231	3.85764	4.87654	3.85185	4.25459	0.30991	0.756634	0.999748
chr12	31949200	31950894	3679	1180	NA	NA	7.13714	6.87539	7.5783	6.07794	6.91719	-0.25184	0.80117	0.999748
chr12	32378516	32379608	3681	1181	NA	NA	5.65225	4.01647	5.72851	5.09914	5.12409	0.81919	0.412695	0.999748
chr12	32819583	32821175	3682	1182	NA	NA	6.39206	5.1532	6.95923	6.09154	6.14901	1.06418	0.287275	0.999748
chr12	32953540	32954812	3683	1183	NA	NA	6.50539	5.34505	6.64156	5.68802	6.04501	0.33869	0.734853	0.999748
chr12	33345131	33345858	NA	1184	NA	NA	3.53694	2.78759	4.62329	3.78645	3.68357	1.47394	0.140529	0.999748
chr12	33956875	33958167	3689	1185	NA	NA	5.48144	4.67031	5.77909	4.42477	5.0889	0.03683	0.970617	0.999748
chr12	34199989	34200483	3692	1186	NA	NA	6.00042	5.71303	4.94459	3.71794	5.094	-2.15655	0.0310644	0.999748
chr12	36793775	36794482	3705	1188	NA	NA	5.48144	5.61711	5.00957	3.57032	4.91961	-1.78032	0.0750536	0.999748
chr12	37426505	37427310	3708	1189	NA	NA	5.00887	4.01647	4.89958	3.49042	4.35384	-0.44909	0.653379	0.999748
chr12	40037085	40038387	3714	1191	NA	NA	6.71698	4.51929	6.38822	5.80823	5.85818	0.67871	0.49734	0.999748
chr12	40445331	40447047	3717	1192	NA	NA	6.48544	5.56665	6.61397	5.80823	6.11857	0.26161	0.793625	0.999748
chr12	44268766	44269792	3722	1193	NA	NA	5.95761	5.08313	6.22451	5.12583	5.59777	0.21884	0.826778	0.999748
chr12	51347778	51348587	3729	1194	NA	NA	5.35518	4.5714	5.64916	4.33613	4.97797	0.0415	0.9669	0.999748
chr12	51828641	51830164	3733	1195	NA	NA	5.83681	4.01647	5.80372	5.12583	5.19571	0.76076	0.446816	0.999748
chr12	51970952	51971499	3736	1196	NA	NA	5.1423	3.58087	4.80512	3.64602	4.29358	-0.19228	0.847526	0.999748
chr12	52602922	52604939	3741	1198	NA	NA	6.56365	6.00597	6.54257	5.61455	6.18169	-0.29157	0.770621	0.999748
chr12	53253059	53254020	3744	1199	NA	NA	4.47341	3.77115	4.47778	4.14063	4.21574	0.26425	0.79159	0.999748
chr12	54795238	54795945	3753	1206	NA	NA	5.2168	3.85764	4.50808	4.33613	4.47966	-0.16274	0.870727	0.999748
chr12	54862484	54863330	3754	1207	NA	NA	4.92246	4.01647	5.07175	4.58721	4.64947	0.50896	0.610791	0.999748
chr12	55835967	55837097	3763	1208	NA	NA	6.39206	5.51436	6.66192	5.65176	6.05502	0.28787	0.773451	0.999748
chr12	56951926	56952343	3773	1209	NA	NA	3.99772	3.23808	3.51151	2.27488	3.25555	-1.02452	0.305615	0.999748
chr12	57230227	57230870	3775	1210	NA	NA	5.31051	4.08977	5.13137	4.62512	4.78919	0.25178	0.801215	0.999748
chr12	59061064	59061580	3781	1211	NA	NA	3.99772	2.95388	4.34978	4.28968	3.89777	1.19307	0.232869	0.999748
chr12	59066244	59067668	3782	1213	NA	NA	5.85248	5.08313	6.25162	5.22789	5.60378	0.38447	0.700641	0.999748
chr12	59130834	59131814	3783	1214	NA	NA	5.33302	3.36162	5.50636	4.58721	4.69705	0.98885	0.322762	0.999748
chr12	64965298	64966693	3786	1215	NA	NA	6.00042	5.00948	6.37184	5.27634	5.66452	0.45117	0.651876	0.999748
chr12	65172073	65173171	3790	1216	NA	NA	5.67004	4.22607	5.6761	5.07195	5.16104	0.6022	0.547057	0.999748
chr12	69168284	69169041	3794	1218	NA	NA	4.30147	3.85764	4.78051	4.62512	4.39119	0.8811	0.378285	0.999748
chr12	69361241	69361928	3801	1219	NA	NA	5.72213	5.25231	5.99772	4.69807	5.41756	-0.19697	0.843857	0.999748
chr12	69371514	69372456	3802	1220	NA	NA	5.55986	4.01647	5.55071	5.17776	5.0762	0.81439	0.415439	0.999748
chr12	69582767	69583310	3803	1221	NA	NA	4.30147	2.59961	4.31593	3.71794	3.73374	0.80071	0.423317	0.999748
chr12	69987079	69987320	3809	1222	NA	NA	3.88038	1.42604	3.31984	3.22019	2.96161	0.87199	0.383236	0.999748
chr12	70110797	70111154	NA	1224	NA	NA	2.58294	2.38341	3.45041	2.88739	2.82604	0.96941	0.332363	0.999748
chr12	70111404	70112260	3811	1224	NA	NA	5.03656	2.78759	4.56684	4.28968	4.17017	0.72973	0.465571	0.999748
chr12	70824820	70826049	3816	1225	NA	NA	6.0556	4.89143	6.29572	5.36861	5.65284	0.50703	0.612148	0.999748
chr12	71015291	71017122	3822	1226	NA	NA	7.14352	6.47132	7.39182	5.90385	6.72763	-0.2256	0.821515	0.999748
chr12	71136676	71137200	3823	1227	NA	NA	3.45722	2.95388	4.012	3.00706	3.35754	0.42973	0.6674	0.999748
chr12	71309536	71309988	3825	1229	NA	NA	4.62702	3.67915	4.09419	3.97438	4.09368	-0.16795	0.866627	0.999748
chr12	72441872	72442438	3831	1230	NA	NA	4.30147	3.23808	5.07175	4.38113	4.24811	1.35245	0.176264	0.999748
chr12	72760361	72761892	3833	1233	NA	NA	6.13459	3.58087	6.10073	5.07195	5.22204	1.03004	0.303016	0.999748
chr12	73045373	73045809	NA	1235	NA	NA	3.37284	2.95388	3.73292	3.22019	3.31996	0.44277	0.657945	0.999748
chr12	73046189	73046958	3838	1235	NA	NA	4.25508	4.01647	4.31593	4.03195	4.15486	0.05395	0.956974	0.999748
chr12	73052075	73052520	3839	1236	NA	NA	4.43231	4.35059	4.13359	3.49042	4.10173	-0.81916	0.412714	0.999748
chr12	73111584	73113785	3841	1238	NA	NA	6.0556	5.43219	6.11064	5.34609	5.73613	-0.02195	0.982488	0.999748
chr12	73355178	73355732	3845	1239	NA	NA	5.377	5.1532	4.98823	3.78645	4.82622	-1.2409	0.214674	0.999748
chr12	73367452	73368158	3846	1240	NA	NA	4.39	4.51929	4.96658	3.40585	4.32043	-0.37949	0.704336	0.999748
chr12	73460393	73460743	3847	1241	NA	NA	4.053	3.85764	3.57013	2.27488	3.43891	-1.4601	0.144295	0.999748
chr12	73521348	73521571	3848	1242	NA	NA	3.94024	3.77115	3.24985	2.27488	3.30903	-1.54565	0.12222	0.999748
chr12	73525178	73525950	3849	1243	NA	NA	4.10623	3.36162	4.59534	3.22019	3.82084	0.24576	0.805874	0.999748
chr12	73529031	73529457	3850	1244	NA	NA	4.34642	4.5714	3.96907	3.00706	3.97349	-1.37249	0.169942	0.999748
chr12	75817990	75819256	3860	1245	NA	NA	5.03656	3.77115	5.36452	4.80101	4.74331	0.95978	0.337192	0.999748
chr12	76072026	76072327	NA	1246	NA	NA	2.97516	2.95388	3.45041	2.07027	2.86243	-0.28865	0.772854	0.999748
chr12	76254859	76255710	3863	1247	NA	NA	5.616	4.15953	5.81589	4.66205	5.06337	0.4965	0.619553	0.999748
chr12	76368988	76371423	3866	1248	NA	NA	6.56365	4.76286	6.36357	5.32321	5.75332	0.25466	0.798988	0.999748
chr12	76533169	76534378	3869	1249	NA	NA	4.76584	3.36162	5.16978	4.42477	4.4305	1.03702	0.299752	0.999748
chr12	76837272	76837846	3875	1250	NA	NA	5.2168	4.97119	5.6355	4.80101	5.15612	0.17566	0.860564	0.999748
chr12	78748250	78749509	3886	1251	NA	NA	6.44468	5.04677	6.70833	5.70582	5.9764	0.65222	0.514277	0.999748
chr12	79028986	79030117	3889	1252	NA	NA	4.34642	3.10297	5.22555	4.42477	4.27493	1.55574	0.119801	0.999748
chr12	79171969	79172984	3892	1253	NA	NA	5.31051	4.46522	5.60779	4.98717	5.09267	0.57907	0.562556	0.999748
chr12	79846556	79847222	3897	1254	NA	NA	5.70497	5.22002	4.65072	3.78645	4.84054	-1.75853	0.0786876	0.999748
chr12	79928991	79929218	NA	1255	NA	NA	2.85588	1.42604	3.17628	2.07027	2.38212	0.68185	0.495351	0.999748
chr12	80021911	80023056	3900	1258	NA	NA	5.0904	4.01647	5.07175	4.50828	4.67172	0.33446	0.73804	0.999748
chr12	80110170	80110493	NA	1259	NA	NA	2.97516	1.81992	3.45041	2.07027	2.57894	0.51289	0.608037	0.999748
chr12	80112542	80113601	3902	1260	NA	NA	5.86797	5.25231	5.79146	4.42477	5.33413	-0.63904	0.522814	0.999748
chr12	80115180	80116247	3903	1261	NA	NA	5.59753	4.22607	5.16978	3.71794	4.67783	-0.66153	0.508289	0.999748
chr12	80258972	80260957	3906	1262	NA	NA	6.37046	5.4601	6.70833	6.00794	6.13671	0.62606	0.531288	0.999748
chr12	80435085	80435606	3907	1264	NA	NA	4.30147	3.23808	4.44683	4.03195	4.00458	0.6639	0.506771	0.999748
chr12	80436013	80437491	3908	1264	NA	NA	4.663	4.08977	5.22555	4.08731	4.51641	0.3959	0.692184	0.999748
chr12	80790167	80791055	3916	1265	NA	NA	5.67004	4.01647	5.44504	4.69807	4.9574	0.32275	0.746895	0.999748
chr12	81094774	81095187	NA	1266	NA	NA	3.08532	2.38341	3.57013	2.88739	2.98156	0.69893	0.484612	0.999748
chr12	82168981	82170392	3922	1268	NA	NA	5.616	5.00948	5.89827	5.39079	5.47863	0.46905	0.639042	0.999748
chr12	83631823	83632838	3928	1270	NA	NA	5.7724	5.08313	5.87521	5.20305	5.48345	0.15744	0.874904	0.999748
chr12	83920991	83922341	3932	1271	NA	NA	6.64685	6.35719	6.94822	5.80823	6.44012	-0.17501	0.861074	0.999748
chr12	84192820	84194128	3938	1272	NA	NA	5.16756	3.67915	5.22555	4.7675	4.70994	0.8103	0.417787	0.999748
chr12	85454957	85455943	3959	1274	NA	NA	6.53481	6.32719	6.90333	5.61455	6.34497	-0.24325	0.80782	0.999748
chr12	85485732	85488013	3963	1275	NA	NA	6.30366	5.71303	6.64156	5.36861	6.00672	-0.0046	0.996326	0.999748
chr12	86037169	86038029	3971	1276	NA	NA	3.68426	4.5714	4.72998	3.57032	4.13899	0.03155	0.974829	0.999748
chr12	86174756	86175799	NA	1277	NA	NA	4.15758	3.85764	4.38286	4.19204	4.14753	0.39562	0.692396	0.999748
chr12	86678485	86679482	3978	1279	NA	NA	4.47341	3.67915	4.59534	4.08731	4.2088	0.3747	0.70789	0.999748
chr12	86884023	86885091	3985	1280	NA	NA	5.52118	4.28967	5.53608	4.7332	5.02003	0.32404	0.745918	0.999748
chr12	86893613	86894223	NA	1281	NA	NA	3.37284	2.95388	3.83207	2.88739	3.26154	0.27761	0.781321	0.999748
chr12	86894538	86895026	3987	1282	NA	NA	4.79856	4.08977	4.20931	2.88739	3.99626	-1.26642	0.205394	0.999748
chr12	91588209	91589219	4010	1283	NA	NA	5.2168	4.71733	5.39727	4.19204	4.88086	-0.24373	0.807442	0.999748
chr12	91589478	91590880	4010	1284	NA	NA	6.84778	5.4601	6.89188	5.79166	6.24785	0.26554	0.790599	0.999748
chr12	94253048	94253449	NA	1285	NA	NA	2.85588	2.78759	3.78335	3.57032	3.24929	1.20885	0.226748	0.999748
chr12	95694593	95696097	4018	1286	NA	NA	5.65225	5.04677	5.75402	5.29997	5.43825	0.25091	0.80189	0.999748
chr12	98160551	98161177	4022	1287	NA	NA	4.43231	4.22607	4.31593	2.88739	3.96542	-1.02852	0.303732	0.999748
chr12	98258667	98259648	4023	1288	NA	NA	5.55986	4.22607	5.72851	5.04424	5.13967	0.69754	0.485483	0.999748
chr12	98746452	98747628	4029	1289	NA	NA	5.39851	3.67915	5.41337	4.66205	4.78827	0.70528	0.480654	0.999748
chr12	98920291	98921212	4031	1290	NA	NA	4.76584	4.76286	5.00957	3.78645	4.58118	-0.5179	0.60454	0.999748
chr12	99392030	99393862	4034	1291	NA	NA	5.97202	5.00948	6.01892	5.39079	5.5978	0.30268	0.76214	0.999748
chr12	99884183	99885111	4039	1293	NA	NA	5.33302	4.51929	5.34787	5.07195	5.06803	0.40115	0.688321	0.999748
chr12	100159141	100159919	4041	1294	NA	NA	4.20715	3.10297	4.96658	3.78645	4.01579	1.01992	0.30779	0.999748
chr12	100187169	100188168	4043	1295	NA	NA	5.95761	5.22002	6.24264	5.47623	5.72413	0.38257	0.702044	0.999748
chr12	100724509	100725786	4048	1296	NA	NA	7.50736	6.89597	8.03112	6.70968	7.28603	0.23854	0.811465	0.999748
chr12	100990046	100991028	4051	1297	NA	NA	4.86184	5.00948	5.42929	4.08731	4.84698	-0.25073	0.802029	0.999748
chr12	101082621	101084093	4054	1298	NA	NA	5.59753	4.28967	5.85177	5.34609	5.27127	0.92644	0.354238	0.999748
chr12	101818531	101819528	4057	1299	NA	NA	5.19239	4.67031	5.0919	4.24169	4.79907	-0.374	0.70841	0.999748
chr12	102468857	102469600	4063	1300	NA	NA	5.616	4.46522	5.60779	5.20305	5.22301	0.51573	0.606057	0.999748
chr12	104623938	104624812	4085	1302	NA	NA	4.92246	5.40372	5.36452	4.14063	4.95783	-0.58035	0.561692	0.999748
chr12	104634847	104635073	4086	1303	NA	NA	4.10623	3.77115	3.51151	2.88739	3.56907	-1.04507	0.296014	0.999748
chr12	104769330	104769583	NA	1304	NA	NA	3.37284	2.95388	3.24985	3.00706	3.14591	-0.04935	0.960639	0.999748
chr12	105453527	105454328	NA	1305	NA	NA	3.45722	3.58087	4.87654	4.19204	4.02667	1.43526	0.151244	0.999748
chr12	105454829	105455883	4094	1307	NA	NA	5.2168	5.1532	5.33101	3.71794	4.85474	-0.93379	0.350437	0.999748
chr12	105784248	105785227	4097	1308	NA	NA	5.19239	4.35059	5.38099	4.80101	4.93124	0.45169	0.651505	0.999748
chr12	107889976	107890415	NA	1309	NA	NA	0	3.4754	3.8792	2.07027	2.35622	1.7488	0.0803567	0.999748
chr12	107979672	107980871	4104	1311	NA	NA	5.92835	5.25231	5.55071	5.12583	5.4643	-0.35634	0.721592	0.999748
chr12	107981110	107981311	NA	1311	NA	NA	1.16857	2.129	3.01683	2.45405	2.19211	1.5362	0.124521	0.999748
chr12	108003013	108003274	NA	1313	NA	NA	3.28322	1.81992	3.24985	2.45405	2.70176	0.42464	0.671105	0.999748
chr12	108003880	108004500	4106	1314	NA	NA	4.053	3.10297	4.44683	4.03195	3.90869	0.93504	0.349791	0.999748
chr12	108004759	108005694	4107	1315	NA	NA	4.47341	4.22607	4.72998	4.24169	4.41779	0.1924	0.847432	0.999748
chr12	108006137	108006663	4108	1316	NA	NA	3.94024	3.10297	4.38286	3.64602	3.76802	0.69673	0.485991	0.999748
chr12	108274763	108276928	4114	1317	NA	NA	6.6647	6.38658	7.24663	6.00794	6.57646	0.14369	0.885751	0.999748
chr12	108792335	108793458	4120	1318	NA	NA	6.50539	4.51929	6.08071	5.07195	5.54433	0.09046	0.927921	0.999748
chr12	108794328	108794677	4121	1319	NA	NA	4.30147	2.78759	3.96907	2.07027	3.2821	-0.742	0.458105	0.999748
chr12	108835268	108836556	4122	1320	NA	NA	6.14735	5.08313	6.70179	5.32321	5.81387	0.56162	0.57439	0.999748
chr12	109417666	109417908	NA	1322	NA	NA	3.61248	3.36162	3.31984	1.18894	2.87072	-1.74261	0.0814331	0.999748
chr12	109450210	109450414	4130	1323	NA	NA	3.18766	3.10297	3.09876	2.88739	3.06919	-0.21523	0.829596	0.999748
chr12	109921909	109922544	4136	1325	NA	NA	4.86184	4.15953	4.50808	3.97438	4.37596	-0.38093	0.703266	0.999748
chr12	110158139	110158800	4138	1326	NA	NA	4.10623	4.76286	4.17195	2.45405	3.87377	-1.58554	0.112875	0.999748
chr12	110591197	110592148	4145	1327	NA	NA	5.97202	5.3148	5.94332	4.14063	5.34269	-0.85025	0.395206	0.999748
chr12	110695901	110697060	4148	1328	NA	NA	6.37046	4.71733	6.45196	5.47623	5.75399	0.59403	0.552503	0.999748
chr12	110737415	110738844	4150	1329	NA	NA	5.85248	4.84984	6.17815	5.01599	5.47411	0.34764	0.728115	0.999748
chr12	111038344	111039656	4157	1330	NA	NA	6.42386	5.48748	6.75961	5.39079	6.01543	0.16897	0.865822	0.999748
chr12	111376911	111378253	4160	1331	NA	NA	5.59753	4.08977	5.71559	5.09914	5.12551	0.79692	0.425515	0.999748
chr12	111537479	111539146	4168	1332	NA	NA	6.48544	5.28389	6.94268	5.61455	6.08164	0.55694	0.577582	0.999748
chr12	111678309	111678683	NA	1333	NA	NA	3.28322	2.38341	3.51151	3.11755	3.07392	0.6803	0.49633	0.999748
chr12	111966768	111967246	4183	1334	NA	NA	3.99772	2.59961	3.78335	3.71794	3.52465	0.63897	0.52286	0.999748
chr12	112405809	112406805	4197	1335	NA	NA	4.34642	4.08977	4.67763	4.03195	4.28644	0.19325	0.84677	0.999748
chr12	112693456	112693750	4217	1336	NA	NA	3.75264	2.95388	3.78335	3.40585	3.47393	0.34118	0.732972	0.999748
chr12	113000184	113001273	4238	1337	NA	NA	6.17253	5.4601	6.74696	5.32321	5.9257	0.30928	0.757115	0.999748
chr12	116404403	116405975	4259	1338	NA	NA	6.042	5.11859	6.85699	5.55689	5.89362	0.88589	0.375696	0.999748
chr12	117843307	117844130	4274	1339	NA	NA	5.11658	3.77115	5.13137	4.92774	4.73671	0.82799	0.407695	0.999748
chr13	3709079	3709850	4292	1340	NA	NA	4.34642	4.807	4.82932	4.08731	4.51751	-0.16737	0.867081	0.999748
chr13	3742945	3743281	4293	1341	NA	NA	3.37284	2.59961	3.62646	2.45405	3.01324	0.07638	0.939119	0.999748
chr13	6547728	6548612	4299	1342	NA	NA	5.48144	5.187	6.33004	5.43414	5.60815	0.77453	0.438635	0.999748
chr13	8885351	8886195	4303	1343	NA	NA	5.80497	4.35059	6.42838	4.80101	5.34624	0.75904	0.447847	0.999748
chr13	9093426	9094506	4305	1344	NA	NA	6.40274	4.84984	6.61397	5.84081	5.92684	0.84978	0.395468	0.999748
chr13	13953738	13954970	4322	1347	NA	NA	6.84778	6.13278	7.14905	6.29336	6.60574	0.32646	0.744082	0.999748
chr13	14062749	14064524	4324	1348	NA	NA	7.14352	6.94618	7.56034	6.09154	6.9354	-0.30947	0.75697	0.999748
chr13	15462769	15464404	4331	1349	NA	NA	5.95761	5.04677	6.42838	5.34609	5.69471	0.54434	0.586217	0.999748
chr13	17185177	17185659	NA	1350	NA	NA	3.53694	2.95388	3.92483	3.64602	3.51542	0.76343	0.445227	0.999748
chr13	17804553	17805841	4340	1351	NA	NA	6.39206	5.34505	7.00775	5.80823	6.13827	0.7626	0.445718	0.999748
chr13	21749882	21750818	4363	1353	NA	NA	4.51337	4.08977	5.6355	4.54828	4.69673	1.11728	0.263902	0.999748
chr13	21753194	21754900	4364	1354	NA	NA	6.97487	6.15002	7.2865	5.79166	6.55076	-0.03303	0.973651	0.999748
chr13	22049927	22051438	4383	1355	NA	NA	5.48144	5.25231	5.74132	4.69807	5.29328	-0.20807	0.835178	0.999748
chr13	23498622	23499249	4395	1356	NA	NA	4.62702	4.46522	4.47778	3.57032	4.28509	-0.73806	0.460497	0.999748
chr13	23534854	23535897	4403	1357	NA	NA	5.72213	4.6217	5.83991	4.42477	5.15213	-0.05595	0.955384	0.999748
chr13	23551245	23551867	4406	1358	NA	NA	5.00887	3.58087	4.80512	4.03195	4.3567	0.17483	0.861217	0.999748
chr13	23561833	23562665	4408	1359	NA	NA	5.46115	3.93924	5.90967	3.91442	4.80612	0.29949	0.764572	0.999748
chr13	23738528	23740088	4418	1360	NA	NA	5.97202	5.22002	6.19687	5.22789	5.6542	0.1645	0.869342	0.999748
chr13	23760522	23762720	4424	1361	NA	NA	7.57028	6.44362	7.50883	6.31671	6.95986	-0.13315	0.894081	0.999748
chr13	25754637	25754933	NA	1362	NA	NA	3.75264	3.10297	3.8792	2.27488	3.25242	-0.49588	0.619993	0.999748
chr13	28544512	28544730	NA	1363	NA	NA	3.18766	3.58087	3.57013	2.07027	3.10223	-0.79742	0.425226	0.999748
chr13	29983960	29985090	4445	1368	NA	NA	4.59013	3.93924	5.49128	4.42477	4.61135	0.98018	0.327022	0.999748
chr13	30484650	30485006	NA	1369	NA	NA	2.72586	3.36162	3.57013	2.88739	3.13625	0.26157	0.79366	0.999748
chr13	31815539	31816072	NA	1371	NA	NA	3.81792	3.36162	4.05368	3.316	3.6373	0.1344	0.893086	0.999748
chr13	31853415	31854305	4458	1372	NA	NA	6.06907	6.24935	5.80372	3.71794	5.46002	-1.97689	0.0480816	0.999748
chr13	34874001	34874568	4479	1374	NA	NA	4.39	3.4754	4.78051	3.22019	3.96652	0.09563	0.923815	0.999748
chr13	34875187	34876016	4480	1375	NA	NA	4.86184	3.77115	5.05132	4.50828	4.54815	0.65498	0.512498	0.999748
chr13	35740672	35741877	4482	1376	NA	NA	6.52507	4.51929	5.92097	5.47623	5.61039	0.2494	0.803053	0.999748
chr13	36117075	36118100	4485	1377	NA	NA	5.80497	4.71733	5.50636	4.54828	5.14424	-0.33056	0.740986	0.999748
chr13	36735899	36737011	4490	1378	NA	NA	5.616	5.28389	5.88679	4.89709	5.42094	-0.08201	0.93464	0.999748
chr13	37492105	37492824	NA	1379	NA	NA	3.81792	3.85764	4.70404	3.316	3.9239	0.2435	0.807624	0.999748
chr13	37825385	37828294	4493	1381	NA	NA	5.82098	5.25231	6.15918	5.68802	5.73012	0.54704	0.584361	0.999748
chr13	38036925	38037551	4497	1382	NA	NA	5.0904	3.4754	4.67763	4.28968	4.38328	0.28381	0.776563	0.999748
chr13	38634809	38635253	4503	1384	NA	NA	4.95184	3.10297	5.07175	4.08731	4.30347	0.78055	0.435087	0.999748
chr13	38960119	38960911	4506	1385	NA	NA	4.053	3.4754	4.87654	4.14063	4.13639	1.05234	0.292669	0.999748
chr13	40417676	40418067	4510	1387	NA	NA	3.94024	4.08977	3.8792	2.75689	3.66652	-0.9853	0.3245	0.999748
chr13	40646013	40646528	4511	1388	NA	NA	5.00887	4.40904	4.28126	1.83176	3.88273	-2.33608	0.0195071	0.999748
chr13	40722619	40723418	4512	1390	NA	NA	5.16756	4.01647	5.1507	4.28968	4.6561	0.18121	0.856209	0.999748
chr13	40730633	40732039	4514	1392	NA	NA	4.92246	3.85764	5.36452	4.46713	4.65294	0.74329	0.457324	0.999748
chr13	42051059	42053294	4525	1393	NA	NA	6.53481	5.68964	6.68862	5.57637	6.12236	0.02865	0.977142	0.999748
chr13	43365222	43365844	4530	1394	NA	NA	4.47341	3.58087	5.36452	4.33613	4.43873	1.16375	0.244555	0.999748
chr13	43481018	43481833	4532	1395	NA	NA	4.73237	3.67915	4.62329	4.28968	4.33112	0.35446	0.723001	0.999748
chr13	43615623	43616197	4534	1396	NA	NA	4.30147	3.10297	4.05368	3.71794	3.79401	0.25954	0.795223	0.999748
chr13	43930144	43931029	4537	1397	NA	NA	5.0904	5.40372	4.65072	3.57032	4.67879	-1.60674	0.108144	0.999748
chr13	44026756	44027030	4540	1399	NA	NA	4.10623	3.77115	3.73292	2.27488	3.4713	-1.32152	0.186359	0.999748
chr13	44729790	44731300	4543	1402	NA	NA	6.25734	5.08313	6.26055	5.29997	5.72525	0.15554	0.876396	0.999748
chr13	45002104	45002414	4547	1404	NA	NA	3.81792	2.78759	3.45041	3.22019	3.31903	0.04601	0.963307	0.999748
chr13	45469506	45469955	4552	1405	NA	NA	3.81792	3.23808	3.92483	2.88739	3.46706	-0.17231	0.863194	0.999748
chr13	45963603	45964536	4557	1406	NA	NA	5.0904	3.36162	4.50808	4.54828	4.37709	0.42719	0.669251	0.999748
chr13	46727248	46728231	4561	1407	NA	NA	5.46115	4.35059	5.39727	4.38113	4.89754	-0.02357	0.981199	0.999748
chr13	46929927	46930806	4562	1408	NA	NA	4.73237	3.4754	4.78051	4.38113	4.34235	0.67424	0.500171	0.999748
chr13	48227783	48228258	4565	1409	NA	NA	4.39	4.01647	4.47778	3.22019	4.02611	-0.50081	0.616519	0.999748
chr13	49420759	49421472	4582	1410	NA	NA	5.39851	4.08977	5.60779	4.28968	4.84644	0.28924	0.772404	0.999748
chr13	51221446	51221845	4586	1411	NA	NA	4.89247	4.51929	3.57013	3.00706	3.99724	-2.00363	0.0451374	0.999748
chr13	51258842	51259814	4587	1412	NA	NA	4.79856	4.51929	5.00957	3.64602	4.49336	-0.46812	0.639711	0.999748
chr13	51279735	51280698	4588	1413	NA	NA	5.24081	5.22002	4.75547	3.71794	4.73356	-1.40482	0.160107	0.999748
chr13	51314287	51315040	4589	1414	NA	NA	5.59753	4.67031	4.98823	4.38113	4.9093	-0.63509	0.525386	0.999748
chr13	51644681	51645804	4592	1416	NA	NA	5.86797	4.89143	6.5055	5.25232	5.62931	0.70574	0.480369	0.999748
chr13	52703596	52703853	NA	1417	NA	NA	2.85588	2.78759	3.24985	2.27488	2.79205	-0.08394	0.933107	0.999748
chr13	53183183	53183658	4604	1420	NA	NA	3.99772	3.10297	4.67763	3.57032	3.83716	0.81094	0.417419	0.999748
chr13	53201459	53202073	4605	1421	NA	NA	4.47341	4.35059	4.38286	3.22019	4.10676	-0.86304	0.388139	0.999748
chr13	53205198	53205454	NA	1422	NA	NA	3.37284	3.10297	3.45041	2.07027	2.99912	-0.67514	0.499603	0.999748
chr13	53285289	53286594	4610	1425	NA	NA	4.95184	3.93924	4.96658	3.71794	4.3939	-0.14601	0.883915	0.999748
chr13	53309402	53310233	4611	1426	NA	NA	5.31051	4.5714	4.92226	3.71794	4.63053	-0.87771	0.380122	0.999748
chr13	53320974	53321202	4612	1427	NA	NA	3.88038	4.01647	3.01683	2.27488	3.29714	-1.84145	0.0655859	0.999748
chr13	53993109	53993543	NA	1428	NA	NA	3.61248	3.4754	3.92483	3.57032	3.64576	0.28788	0.773443	0.999748
chr13	54302512	54303794	4623	1429	NA	NA	5.00887	3.77115	5.34787	4.38113	4.62726	0.67079	0.502373	0.999748
chr13	54332214	54332517	NA	1430	NA	NA	2.72586	2.95388	3.3866	2.75689	2.95581	0.32781	0.743065	0.999748
chr13	54687210	54688512	4631	1432	NA	NA	6.6647	5.4601	6.72132	5.7234	6.14238	0.22614	0.8211	0.999748
chr13	54693235	54694745	4632	1433	NA	NA	6.74242	6.26526	7.43583	6.20852	6.66301	0.45003	0.652698	0.999748
chr13	54837461	54838023	4636	1434	NA	NA	4.10623	2.95388	4.47778	3.91442	3.86308	0.94159	0.346427	0.999748
chr13	55099942	55100308	4638	1435	NA	NA	4.39	2.95388	3.83207	3.40585	3.64545	-0.0749	0.940295	0.999748
chr13	55210111	55212791	4643	1436	NA	NA	6.41334	5.04677	6.74696	6.02221	6.05732	0.92531	0.354826	0.999748
chr13	55329325	55331119	4646	1437	NA	NA	6.08241	4.76286	6.4828	5.34609	5.66854	0.69527	0.486901	0.999748
chr13	55487428	55488648	4654	1438	NA	NA	4.30147	4.22607	5.18861	3.97438	4.42263	0.44917	0.653318	0.999748
chr13	55510815	55513918	4658	1439	NA	NA	6.02827	5.34505	6.52786	5.59559	5.87419	0.53023	0.595967	0.999748
chr13	55535939	55537041	4660	1440	NA	NA	5.55986	4.93186	5.70254	4.50828	5.17564	-0.19856	0.842611	0.999748
chr13	55634843	55635293	4664	1441	NA	NA	4.25508	2.95388	4.012	3.40585	3.6567	0.14765	0.882624	0.999748
chr13	55727191	55728086	4667	1442	NA	NA	5.00887	3.58087	4.75547	3.97438	4.3299	0.09904	0.921111	0.999748
chr13	56159187	56160762	4671	1444	NA	NA	6.44468	6.42957	6.37184	5.77489	6.25525	-0.51425	0.607089	0.999748
chr13	56582023	56582507	4677	1445	NA	NA	4.83054	4.807	5.0306	3.40585	4.5185	-0.849	0.3959	0.999748
chr13	59992726	59993526	4697	1449	NA	NA	6.13459	5.51436	4.96658	3.57032	5.04646	-2.19977	0.0278463	0.999748
chr13	60057782	60058543	4700	1450	NA	NA	5.28765	4.807	4.38286	3.316	4.44838	-1.69347	0.0903973	0.999748
chr13	60069245	60069681	4701	1451	NA	NA	4.62702	3.85764	4.17195	3.71794	4.09364	-0.42042	0.674189	0.999748
chr13	60176723	60178116	4708	1452	NA	NA	6.28069	5.25231	6.13996	5.43414	5.77677	0.02905	0.976825	0.999748
chr13	60409718	60409948	4712	1453	NA	NA	3.68426	3.23808	3.51151	2.75689	3.29768	-0.46224	0.64392	0.999748
chr13	63170528	63170970	NA	1455	NA	NA	3.45722	3.67915	3.92483	3.57032	3.65788	0.25361	0.799803	0.999748
chr13	63171513	63171914	NA	1456	NA	NA	3.68426	3.58087	3.92483	3.22019	3.60254	-0.08489	0.932347	0.999748
chr13	63430836	63431959	4726	1457	NA	NA	6.042	4.6217	6.17815	5.09914	5.48525	0.43372	0.664504	0.999748
chr13	63496886	63497120	NA	1458	NA	NA	2.24601	0.882477	2.83754	2.75689	2.18073	1.74306	0.0813538	0.999748
chr13	63815005	63815599	4731	1460	NA	NA	4.25508	3.4754	4.56684	4.38113	4.16961	0.86058	0.389489	0.999748
chr13	64152071	64153998	4734	1461	NA	NA	6.51526	5.40372	6.95923	5.43414	6.07809	0.33532	0.737392	0.999748
chr13	64274376	64275743	4736	1462	NA	NA	5.39851	4.28967	5.71559	4.28968	4.92336	0.22414	0.822656	0.999748
chr13	64312125	64313098	4738	1463	NA	NA	5.55986	4.15953	5.60779	4.7332	5.01509	0.43938	0.660398	0.999748
chr13	65240510	65241551	4743	1464	NA	NA	5.1423	4.08977	5.56519	4.54828	4.83638	0.62303	0.533282	0.999748
chr13	66932762	66933762	4750	1465	NA	NA	5.68761	4.08977	5.59373	4.98717	5.08957	0.56796	0.570073	0.999748
chr13	68581587	68582289	4765	1466	NA	NA	5.0904	3.93924	5.0919	4.14063	4.56554	0.14341	0.885966	0.999748
chr13	69534429	69535634	4769	1467	NA	NA	6.15999	4.01647	6.05014	5.22789	5.36362	0.77865	0.436202	0.999748
chr13	69610772	69612103	4770	1468	NA	NA	6.81617	5.86692	7.03922	5.79166	6.37849	0.10446	0.916807	0.999748
chr13	70637296	70638320	4772	1469	NA	NA	5.57882	4.51929	5.75402	5.07195	5.23102	0.51449	0.606919	0.999748
chr13	73833573	73834136	4797	1470	NA	NA	4.663	4.51929	4.62329	3.22019	4.25644	-0.94634	0.343999	0.999748
chr13	76098255	76099118	4817	1471	NA	NA	5.39851	4.35059	5.60779	4.7675	5.0311	0.44262	0.658048	0.999748
chr13	77263430	77263927	4821	1473	NA	NA	4.053	3.67915	4.20931	2.45405	3.59888	-0.75547	0.449983	0.999748
chr13	78198027	78198778	NA	1475	NA	NA	3.61248	2.59961	4.34978	3.85185	3.60343	1.40632	0.159661	0.999748
chr13	78199155	78199550	4825	1475	NA	NA	3.75264	2.38341	3.57013	3.91442	3.40515	0.95319	0.340516	0.999748
chr13	80885217	80886457	4833	1477	NA	NA	6.33745	5.187	6.60698	5.27634	5.85194	0.25367	0.799752	0.999748
chr13	81782875	81783966	4838	1478	NA	NA	6.42386	5.4601	6.41245	5.80823	6.02616	0.23801	0.811878	0.999748
chr13	83730594	83731517	4843	1479	NA	NA	4.86184	3.77115	5.81589	4.86576	4.82866	1.4481	0.14762	0.999748
chr13	84222016	84222657	4845	1480	NA	NA	4.89247	3.58087	5.07175	3.78645	4.33288	0.27204	0.785593	0.999748
chr13	89739298	89739873	NA	1482	NA	NA	3.37284	2.95388	4.31593	3.64602	3.57217	1.15586	0.247766	0.999748
chr13	89740133	89741742	4854	1483	NA	NA	5.41969	5.22002	5.46062	5.04424	5.28614	-0.09533	0.924058	0.999748
chr13	89742177	89742666	4855	1484	NA	NA	4.47341	3.85764	4.34978	4.03195	4.1782	0.03582	0.971423	0.999748
chr13	90760171	90760791	4860	1486	NA	NA	4.89247	4.08977	4.75547	3.71794	4.36391	-0.35967	0.719103	0.999748
chr13	90762111	90762561	4861	1487	NA	NA	4.20715	4.01647	4.28126	3.11755	3.90561	-0.58302	0.559894	0.999748
chr13	90922933	90923314	4864	1488	NA	NA	4.34642	3.85764	4.012	3.78645	4.00063	-0.28671	0.77434	0.999748
chr13	91223501	91224313	4866	1489	NA	NA	5.50145	4.76286	5.50636	5.09914	5.21745	0.24117	0.809425	0.999748
chr13	91370922	91371365	4867	1490	NA	NA	4.43231	4.22607	3.92483	3.316	3.9748	-1.00199	0.316372	0.999748
chr13	91460305	91461493	4868	1492	NA	NA	6.69108	4.71733	6.49798	5.49682	5.8508	0.41449	0.678524	0.999748
chr13	92530292	92531187	4873	1493	NA	NA	5.67004	4.6217	5.76661	4.46713	5.13137	-0.041	0.967293	0.999748
chr13	93191962	93192681	4877	1494	NA	NA	5.41969	4.6217	5.11177	4.62512	4.94457	-0.21524	0.829583	0.999748
chr13	93499115	93500283	4879	1495	NA	NA	5.28765	4.35059	5.18861	4.28968	4.77913	-0.11306	0.909986	0.999748
chr13	93771581	93772386	4880	1496	NA	NA	4.6981	3.23808	4.80512	3.85185	4.14829	0.50949	0.610418	0.999748
chr13	93898155	93898709	4881	1497	NA	NA	4.55226	4.40904	4.50808	2.88739	4.08919	-1.10682	0.2684	0.999748
chr13	93899495	93899911	4882	1498	NA	NA	3.99772	4.01647	4.20931	3.64602	3.96738	-0.11229	0.910596	0.999748
chr13	94057517	94058558	4884	1499	NA	NA	4.86184	3.85764	4.85312	4.46713	4.50993	0.42466	0.671096	0.999748
chr13	94285128	94285870	4886	1500	NA	NA	5.26442	3.58087	4.53776	4.33613	4.42979	0.02022	0.983868	0.999748
chr13	94358524	94359245	4887	1501	NA	NA	4.73237	3.77115	4.94459	4.08731	4.38386	0.37349	0.708794	0.999748
chr13	94608146	94609227	4888	1502	NA	NA	6.29222	6.38658	6.0604	4.95776	5.92424	-1.17383	0.240493	0.999748
chr13	94976054	94976628	4892	1503	NA	NA	4.51337	3.4754	4.85312	4.24169	4.2709	0.78181	0.434347	0.999748
chr13	95324762	95325743	4893	1504	NA	NA	5.0904	3.77115	5.00957	3.78645	4.41439	-0.04632	0.963057	0.999748
chr13	95547408	95547696	NA	1505	NA	NA	1.16857	2.78759	3.24985	2.07027	2.31907	0.96411	0.335014	0.999748
chr13	95618103	95618767	4898	1506	NA	NA	4.43231	3.93924	5.0306	4.62512	4.50682	0.90772	0.364049	0.999748
chr13	98503739	98504145	NA	1508	NA	NA	3.08532	1.42604	3.45041	2.07027	2.50801	0.71344	0.475589	0.999748
chr13	98504170	98505121	NA	1508	NA	NA	3.68426	2.95388	4.53776	4.33613	3.87801	1.58035	0.114059	0.999748
chr13	98814980	98815736	4923	1509	NA	NA	5.88331	4.97119	5.76661	4.69807	5.32979	-0.27555	0.7829	0.999748
chr13	99413640	99414888	4929	1510	NA	NA	6.12172	5.56665	6.18754	4.54828	5.60605	-0.67331	0.500764	0.999748
chr13	99780995	99781209	4935	1511	NA	NA	3.94024	3.36162	3.01683	2.45405	3.19318	-1.29424	0.195614	0.999748
chr13	100650740	100651664	4944	1513	NA	NA	5.46115	3.93924	5.55071	4.7675	4.92965	0.64876	0.516506	0.999748
chr13	101215823	101216082	4951	1514	NA	NA	3.99772	3.77115	3.45041	2.88739	3.52667	-1.01156	0.311772	0.999748
chr13	101719319	101719672	4954	1515	NA	NA	4.76584	4.51929	3.73292	2.75689	3.94374	-1.97588	0.0481961	0.999748
chr13	101813487	101813701	NA	1516	NA	NA	2.72586	3.36162	3.17628	0.713634	2.49435	-1.55335	0.120371	0.999748
chr13	102625177	102626114	4960	1518	NA	NA	4.86184	4.08977	5.0306	3.78645	4.44216	-0.09512	0.924225	0.999748
chr13	103027459	103028152	4962	1519	NA	NA	4.79856	4.76286	5.24367	3.78645	4.64788	-0.37555	0.707261	0.999748
chr13	103773952	103774947	4964	1520	NA	NA	5.98629	4.93186	6.0294	4.98717	5.48368	0.06956	0.944541	0.999748
chr13	103920735	103921956	4965	1522	NA	NA	5.94305	3.4754	5.27925	4.46713	4.79121	0.23179	0.816705	0.999748
chr13	104178001	104179087	4970	1523	NA	NA	5.59753	5.34505	5.5213	4.66205	5.28148	-0.53667	0.59151	0.999748
chr13	107889083	107891702	4985	1524	NA	NA	7.49743	6.68745	7.68493	6.68298	7.1382	0.12938	0.897063	0.999748
chr13	108315974	108316841	4990	1525	NA	NA	5.2168	4.08977	5.2072	4.38113	4.72373	0.19916	0.84214	0.999748
chr13	109822344	109822590	4995	1526	NA	NA	3.99772	2.78759	3.57013	3.49042	3.46147	0.19456	0.845744	0.999748
chr13	111489466	111490659	4998	1527	NA	NA	6.83206	5.84592	7.0288	5.97895	6.42143	0.23311	0.815683	0.999748
chr13	111808727	111809013	5001	1528	NA	NA	3.61248	1.42604	3.51151	2.88739	2.85935	0.96159	0.336278	0.999748
chr13	111809257	111809649	5002	1528	NA	NA	3.88038	2.129	3.51151	3.00706	3.13199	0.35992	0.718914	0.999748
chr13	112088307	112088660	5003	1529	NA	NA	3.28322	3.93924	3.92483	1.83176	3.24476	-1.03615	0.300158	0.999748
chr13	112346762	112347054	5004	1530	NA	NA	3.68426	4.35059	3.73292	2.6134	3.59529	-1.19354	0.232686	0.999748
chr13	112926995	112927913	5009	1531	NA	NA	5.92835	5.08313	6.01892	4.98717	5.50439	-0.00381	0.996962	0.999748
chr13	113031883	113032403	5012	1532	NA	NA	3.81792	2.129	4.13359	2.88739	3.24198	0.7592	0.44775	0.999748
chr13	117220375	117221189	NA	1535	NA	NA	4.25508	3.4754	4.70404	4.24169	4.16905	0.859	0.390361	0.999748
chr13	118714026	118715701	5034	1538	NA	NA	5.31051	4.84984	5.5213	4.83375	5.12885	0.13762	0.890542	0.999748
chr13	119408718	119409696	5040	1539	NA	NA	4.98064	4.84984	5.39727	3.97438	4.80053	-0.32432	0.745701	0.999748
chr13	119428430	119429785	5041	1540	NA	NA	5.46115	2.95388	5.56519	4.86576	4.7115	1.42496	0.154199	0.999748
chr13	119755051	119756218	5056	1541	NA	NA	4.98064	4.40904	5.49128	4.86576	4.93668	0.68378	0.49413	0.999748
chr14	7822651	7823201	5069	1542	NA	NA	4.34642	4.01647	4.47778	3.40585	4.06163	-0.33876	0.734796	0.999748
chr14	9623385	9624128	5078	1544	NA	NA	5.55986	4.6217	4.47778	4.38113	4.76012	-0.93492	0.349852	0.999748
chr14	13770596	13770961	NA	1545	NA	NA	3.45722	2.59961	3.62646	2.6134	3.07417	0.12937	0.897064	0.999748
chr14	14012298	14013374	5094	1546	NA	NA	5.59753	4.51929	5.36452	4.92774	5.10227	0.12401	0.901307	0.999748
chr14	16554522	16555228	5102	1547	NA	NA	5.46115	5.1532	4.78051	3.316	4.67771	-1.77974	0.0751491	0.999748
chr14	18237987	18239720	5107	1549	NA	NA	7.39953	6.38658	8.01802	6.95264	7.18919	0.8373	0.402444	0.999748
chr14	18270407	18271487	5108	1550	NA	NA	6.25734	4.93186	6.47515	5.09914	5.69087	0.2722	0.785476	0.999748
chr14	18331581	18332074	5109	1551	NA	NA	4.83054	2.95388	4.31593	3.57032	3.91767	0.07197	0.942625	0.999748
chr14	19750550	19751827	5112	1552	NA	NA	6.13459	5.48748	6.18754	5.65176	5.86534	0.15354	0.877974	0.999748
chr14	19986852	19987440	NA	1553	NA	NA	3.68426	2.95388	3.83207	3.11755	3.39694	0.22017	0.82574	0.999748
chr14	20545888	20546619	5123	1554	NA	NA	5.00887	3.36162	4.87654	4.08731	4.33358	0.41942	0.674916	0.999748
chr14	20694854	20696042	5127	1555	NA	NA	5.39851	3.36162	5.33101	4.66205	4.6883	0.87151	0.383496	0.999748
chr14	20702765	20703368	5128	1556	NA	NA	4.15758	3.23808	4.012	4.08731	3.87374	0.49738	0.618933	0.999748
chr14	20733875	20734816	5130	1557	NA	NA	5.0904	3.4754	5.22555	5.04424	4.7089	1.20447	0.228436	0.999748
chr14	20793819	20794420	5132	1558	NA	NA	4.59013	3.10297	4.72998	3.64602	4.01727	0.48272	0.629309	0.999748
chr14	21051924	21053078	5135	1559	NA	NA	6.47535	5.34505	6.27824	5.34609	5.86118	-0.13859	0.889774	0.999748
chr14	21498945	21501415	5142	1564	NA	NA	7.7773	7.13117	7.903	6.91488	7.43159	-0.06403	0.948946	0.999748
chr14	21679666	21680531	5143	1565	NA	NA	4.51337	3.67915	4.56684	3.91442	4.16844	0.20409	0.838285	0.999748
chr14	21830703	21831897	5146	1566	NA	NA	6.0556	4.6217	5.76661	4.92774	5.34291	0.01205	0.990384	0.999748
chr14	21847286	21849565	5148	1567	NA	NA	5.7724	5.08313	6.45196	5.01599	5.58087	0.43289	0.665106	0.999748
chr14	21891569	21892452	5151	1568	NA	NA	5.44057	5.25231	5.46062	4.08731	5.0602	-0.80931	0.418355	0.999748
chr14	21903592	21905235	5152	1569	NA	NA	6.0556	6.11534	5.77909	4.89709	5.71178	-1.05658	0.290731	0.999748
chr14	21984847	21985313	NA	1570	NA	NA	3.37284	3.10297	3.83207	3.00706	3.32873	0.25681	0.79733	0.999748
chr14	21986705	21986913	NA	1571	NA	NA	2.58294	3.10297	3.09876	3.11755	2.97555	0.37492	0.707728	0.999748
chr14	21987230	21989643	5156	1573	NA	NA	6.26906	5.94801	6.1687	5.67	6.01394	-0.26745	0.789125	0.999748
chr14	21991211	21991492	5157	1574	NA	NA	4.83054	3.67915	3.24985	3.11755	3.71927	-1.51428	0.129986	0.999748
chr14	22048214	22049329	5160	1575	NA	NA	5.50145	5.5921	5.22555	4.58721	5.22658	-0.90533	0.365314	0.999748
chr14	22114770	22115269	5161	1576	NA	NA	4.10623	3.58087	4.34978	3.00706	3.76099	-0.23345	0.815419	0.999748
chr14	22708102	22708487	NA	1579	NA	NA	2.85588	3.85764	3.73292	3.11755	3.391	0.0968	0.922884	0.999748
chr14	23015084	23015989	5170	1580	NA	NA	5.19239	4.84984	4.53776	3.40585	4.49646	-1.48342	0.137996	0.999748
chr14	23385941	23386194	NA	1581	NA	NA	3.53694	3.67915	3.51151	1.83176	3.13984	-1.3238	0.1856	0.999748
chr14	23523969	23524662	5172	1584	NA	NA	5.28765	4.807	4.92226	4.19204	4.80224	-0.69296	0.488349	0.999748
chr14	24262629	24263320	5176	1585	NA	NA	4.62702	4.67031	5.13137	4.24169	4.6676	0.05353	0.957314	0.999748
chr14	24778939	24779756	5179	1586	NA	NA	4.43231	3.93924	5.16978	4.28968	4.45775	0.769	0.441913	0.999748
chr14	24900792	24901146	5180	1587	NA	NA	4.25508	4.08977	4.09419	2.6134	3.76311	-1.15731	0.247175	0.999748
chr14	25023087	25023676	5181	1588	NA	NA	3.94024	4.15953	4.09419	2.88739	3.77034	-0.7904	0.429314	0.999748
chr14	25052118	25052480	NA	1589	NA	NA	2.97516	2.59961	3.62646	2.27488	2.86903	0.23084	0.817443	0.999748
chr14	25123768	25124547	5184	1591	NA	NA	3.81792	4.35059	3.68067	3.97438	3.95589	-0.36294	0.716658	0.999748
chr14	25377791	25378870	5189	1594	NA	NA	5.26442	4.40904	4.98823	3.85185	4.62839	-0.58908	0.555824	0.999748
chr14	25457283	25459971	5192	1596	NA	NA	6.79201	5.94801	6.66192	6.18333	6.39632	0.07439	0.940705	0.999748
chr14	25606493	25608685	5201	1597	NA	NA	6.26906	5.187	5.987	5.34609	5.69729	-0.08692	0.930738	0.999748
chr14	25749074	25749950	5204	1599	NA	NA	4.25508	4.01647	4.56684	4.14063	4.24475	0.30813	0.757991	0.999748
chr14	25768111	25769520	5205	1600	NA	NA	5.82098	4.84984	5.6355	5.15203	5.36459	0.0825	0.934251	0.999748
chr14	25769806	25770199	NA	1600	NA	NA	3.61248	2.78759	3.57013	2.45405	3.10606	-0.2657	0.790475	0.999748
chr14	26669534	26670037	5209	1601	NA	NA	4.30147	3.58087	4.72998	3.64602	4.06458	0.34895	0.727138	0.999748
chr14	27038877	27039977	5212	1602	NA	NA	4.59013	4.35059	4.67763	4.38113	4.49987	0.08344	0.933507	0.999748
chr14	27066013	27066974	5214	1603	NA	NA	5.11658	4.5714	4.85312	3.85185	4.59824	-0.69484	0.48717	0.999748
chr14	27067740	27068510	5215	1605	NA	NA	4.20715	4.08977	4.4152	3.11755	3.95742	-0.54015	0.589102	0.999748
chr14	27069574	27069906	5216	1607	NA	NA	3.88038	3.85764	3.51151	3.00706	3.56415	-0.86197	0.388723	0.999748
chr14	27508131	27508793	5220	1608	NA	NA	4.47341	3.36162	4.85312	3.85185	4.135	0.61493	0.538618	0.999748
chr14	28506187	28506475	5226	1609	NA	NA	3.94024	2.78759	3.45041	3.11755	3.32395	-0.113	0.910029	0.999748
chr14	28509659	28510865	5228	1610	NA	NA	4.663	4.46522	4.78051	3.57032	4.36976	-0.5495	0.582672	0.999748
chr14	28542136	28542600	5229	1611	NA	NA	4.47341	3.85764	3.78335	3.91442	4.0072	-0.44764	0.654421	0.999748
chr14	28972219	28972698	5231	1612	NA	NA	4.10623	3.77115	3.68067	2.88739	3.61136	-0.9255	0.354728	0.999748
chr14	29164239	29164445	5233	1614	NA	NA	4.55226	4.01647	3.01683	1.83176	3.35433	-2.62959	0.00856199	0.999748
chr14	30715091	30716420	5242	1615	NA	NA	5.41969	3.36162	5.42929	4.66205	4.71816	0.926	0.354466	0.999748
chr14	30951262	30951744	5244	1616	NA	NA	4.76584	4.22607	4.78051	4.03195	4.45109	-0.12685	0.899065	0.999748
chr14	31001173	31001728	5245	1617	NA	NA	4.10623	2.59961	4.17195	3.40585	3.57091	0.61634	0.537681	0.999748
chr14	31018654	31019600	5246	1618	NA	NA	5.2168	4.28967	5.57953	4.24169	4.83192	0.22248	0.823948	0.999748
chr14	31206536	31207049	5250	1619	NA	NA	3.88038	3.58087	3.96907	2.88739	3.57943	-0.42749	0.66903	0.999748
chr14	31250956	31251719	5251	1620	NA	NA	5.46115	3.4754	5.36452	4.46713	4.69205	0.6327	0.526941	0.999748
chr14	31435292	31435492	NA	1621	NA	NA	3.08532	0.882477	3.01683	2.75689	2.43538	1.27652	0.201801	0.999748
chr14	31435814	31436466	5256	1621	NA	NA	4.59013	4.35059	4.96658	4.33613	4.56086	0.25587	0.798054	0.999748
chr14	31661728	31662926	5260	1622	NA	NA	5.67004	5.28389	5.89827	4.83375	5.42149	-0.15686	0.875359	0.999748
chr14	32085162	32085917	5263	1623	NA	NA	6.13459	5.00948	5.97621	4.89709	5.50434	-0.1914	0.848216	0.999748
chr14	34310208	34311307	5279	1624	NA	NA	6.00042	4.08977	6.18754	5.41263	5.42259	1.06733	0.285848	0.999748
chr14	34502366	34503290	5281	1625	NA	NA	5.86797	3.67915	5.55071	4.58721	4.92126	0.41761	0.676243	0.999748
chr14	34673432	34674391	5284	1626	NA	NA	5.7724	4.35059	5.70254	4.89709	5.18066	0.33691	0.736191	0.999748
chr14	45388454	45389408	5301	1627	NA	NA	5.48144	4.35059	5.47603	4.33613	4.91105	-0.01405	0.988793	0.999748
chr14	45438186	45439118	5302	1628	NA	NA	5.19239	4.76286	4.89958	3.40585	4.56517	-1.16618	0.243568	0.999748
chr14	45443086	45443362	NA	1629	NA	NA	2.72586	2.59961	3.3866	2.27488	2.74674	0.23752	0.812262	0.999748
chr14	46604812	46606053	5312	1632	NA	NA	5.94305	5.61711	5.22555	4.28968	5.26885	-1.44546	0.148359	0.999748
chr14	46718499	46718893	5314	1633	NA	NA	4.43231	3.85764	4.05368	2.75689	3.77513	-1.04571	0.295721	0.999748
chr14	46882046	46883299	5319	1634	NA	NA	5.44057	3.58087	5.16978	4.58721	4.69461	0.51993	0.603123	0.999748
chr14	46883338	46883810	5319	1634	NA	NA	3.94024	2.129	3.96907	3.49042	3.38219	0.98271	0.325776	0.999748
chr14	47298026	47298860	5323	1636	NA	NA	4.43231	2.59961	4.50808	3.78645	3.83161	0.89248	0.372157	0.999748
chr14	47568164	47568809	5327	1637	NA	NA	4.83054	3.77115	5.11177	4.08731	4.45019	0.42226	0.672842	0.999748
chr14	49066112	49066867	5332	1638	NA	NA	5.377	3.36162	5.47603	4.42477	4.65985	0.82149	0.411388	0.999748
chr14	50061306	50062884	5336	1640	NA	NA	4.55226	4.08977	5.18861	4.50828	4.58473	0.74563	0.455909	0.999748
chr14	50807390	50808118	5337	1641	NA	NA	5.85248	5.25231	6.37184	5.36861	5.71131	0.44932	0.653212	0.999748
chr14	51984409	51985049	5350	1642	NA	NA	4.51337	3.4754	4.38286	3.91442	4.07151	0.21807	0.827383	0.999748
chr14	51985408	51986252	5351	1644	NA	NA	4.39	3.85764	5.16978	3.97438	4.34795	0.63371	0.526287	0.999748
chr14	52019369	52020795	5353	1645	NA	NA	6.4652	5.4601	6.59997	5.79166	6.07923	0.32962	0.741692	0.999748
chr14	52197043	52197810	5355	1646	NA	NA	5.2168	3.4754	4.98823	4.38113	4.51539	0.47865	0.632195	0.999748
chr14	54253623	54254370	5360	1647	NA	NA	5.94305	5.37468	6.09075	5.07195	5.62011	-0.10958	0.912741	0.999748
chr14	54426623	54427383	5365	1648	NA	NA	4.55226	4.28967	4.82932	3.64602	4.32932	-0.25913	0.795541	0.999748
chr14	54553943	54554706	5371	1649	NA	NA	5.19239	3.77115	5.29671	4.7332	4.74836	0.75377	0.451008	0.999748
chr14	54576667	54578284	5373	1650	NA	NA	5.33302	4.5714	5.64916	4.95776	5.12784	0.49656	0.619509	0.999748
chr14	54685976	54687209	5380	1651	NA	NA	6.77567	6.28099	6.9647	5.61455	6.40898	-0.33745	0.735781	0.999748
chr14	54924645	54926912	5388	1652	NA	NA	6.00042	5.28389	6.38822	5.36861	5.76029	0.334	0.738385	0.999748
chr14	55094561	55095073	5392	1653	NA	NA	4.34642	3.67915	4.20931	3.49042	3.93132	-0.23031	0.817857	0.999748
chr14	55106057	55106674	5393	1654	NA	NA	4.10623	3.23808	4.34978	3.40585	3.77499	0.29074	0.771255	0.999748
chr14	55559714	55561153	5401	1656	NA	NA	7.13714	6.45753	7.29522	5.93436	6.70606	-0.25807	0.796361	0.999748
chr14	55590662	55592396	5402	1658	NA	NA	6.54449	6.15002	6.85699	6.09154	6.41076	0.17956	0.857503	0.999748
chr14	55643097	55643955	5404	1659	NA	NA	4.76584	2.95388	4.70404	4.38113	4.20122	0.96517	0.334481	0.999748
chr14	55671656	55672436	5405	1660	NA	NA	5.19239	4.40904	5.34787	4.03195	4.74531	-0.15665	0.875522	0.999748
chr14	55822407	55825249	5415	1662	NA	NA	6.84778	6.49849	6.99711	5.88834	6.55793	-0.32573	0.744637	0.999748
chr14	55825551	55826817	5416	1662	NA	NA	4.6981	4.28967	5.05132	4.24169	4.5702	0.21576	0.829181	0.999748
chr14	55852860	55854499	5417	1663	NA	NA	5.68761	5.3148	5.76661	5.01599	5.44625	-0.15538	0.876527	0.999748
chr14	56778045	56778801	5424	1664	NA	NA	5.26442	4.40904	5.66269	4.62512	4.99032	0.43425	0.664114	0.999748
chr14	56811756	56812928	5426	1666	NA	NA	5.67004	4.5714	5.39727	5.20305	5.21044	0.25367	0.799757	0.999748
chr14	56885320	56886585	5427	1668	NA	NA	5.65225	3.4754	5.74132	5.01599	4.97124	1.15192	0.24938	0.999748
chr14	57571334	57571833	5435	1669	NA	NA	4.25508	3.67915	4.28126	3.40585	3.90533	-0.17468	0.861335	0.999748
chr14	57825870	57826771	5439	1670	NA	NA	5.26442	4.67031	5.07175	4.38113	4.8469	-0.34059	0.73342	0.999748
chr14	58637731	58638618	5443	1672	NA	NA	5.11658	4.35059	4.67763	3.71794	4.46568	-0.75747	0.448787	0.999748
chr14	58656601	58657012	5444	1673	NA	NA	3.68426	3.67915	3.62646	1.83176	3.20541	-1.34668	0.178113	0.999748
chr14	60250990	60251917	5453	1674	NA	NA	5.46115	4.40904	5.64916	4.69807	5.05435	0.33719	0.735979	0.999748
chr14	61046192	61046957	5461	1675	NA	NA	4.43231	4.01647	4.80512	4.08731	4.3353	0.3136	0.75383	0.999748
chr14	61439473	61440433	5463	1676	NA	NA	6.17253	5.22002	6.52786	5.29997	5.80509	0.30768	0.758336	0.999748
chr14	61599392	61599726	NA	1677	NA	NA	3.45722	2.38341	3.83207	3.11755	3.19756	0.78389	0.433121	0.999748
chr14	61648407	61649094	5465	1678	NA	NA	4.83054	3.23808	4.4152	3.91442	4.09956	0.18448	0.853637	0.999748
chr14	61680883	61682882	5466	1680	NA	NA	6.28069	4.76286	5.987	5.32321	5.58844	0.1885	0.850492	0.999748
chr14	62332068	62332660	5469	1681	NA	NA	4.34642	4.35059	4.4152	4.24169	4.33847	-0.02836	0.977377	0.999748
chr14	62760162	62761864	5471	1682	NA	NA	6.93864	6.15002	7.25558	6.20852	6.63819	0.26538	0.790721	0.999748
chr14	63131894	63132796	5477	1683	NA	NA	3.88038	4.15953	5.07175	4.58721	4.42472	1.14444	0.252469	0.999748
chr14	63214903	63215438	5480	1684	NA	NA	3.81792	3.85764	4.67763	3.49042	3.9609	0.34812	0.72776	0.999748
chr14	64439867	64441112	5486	1685	NA	NA	5.44057	4.22607	5.60779	4.58721	4.96541	0.37347	0.708803	0.999748
chr14	65097868	65098399	5490	1686	NA	NA	4.55226	3.23808	4.65072	4.19204	4.15827	0.74391	0.456951	0.999748
chr14	65343257	65344363	5496	1687	NA	NA	6.18495	5.04677	6.3385	5.25232	5.70564	0.25383	0.799634	0.999748
chr14	65358316	65358824	5497	1688	NA	NA	4.89247	2.38341	4.56684	4.28968	4.0331	1.11728	0.2639	0.999748
chr14	65805873	65806203	5500	1689	NA	NA	4.25508	2.59961	3.73292	3.57032	3.53948	0.31706	0.751206	0.999748
chr14	66324776	66325473	5506	1691	NA	NA	4.6981	4.35059	4.98823	4.14063	4.54439	0.05667	0.954812	0.999748
chr14	67383250	67383954	5515	1694	NA	NA	4.43231	4.28967	4.24573	3.64602	4.15343	-0.58685	0.557316	0.999748
chr14	67388961	67389200	5516	1695	NA	NA	3.75264	2.95388	3.3866	3.00706	3.27504	-0.22114	0.824985	0.999748
chr14	67461823	67462121	5517	1696	NA	NA	4.15758	4.01647	3.68067	2.88739	3.68553	-1.13519	0.256322	0.999748
chr14	67569012	67570099	5518	1698	NA	NA	5.7724	5.88762	5.74132	4.08731	5.37216	-1.29452	0.195515	0.999748
chr14	67715249	67716573	5519	1699	NA	NA	7.61688	7.49049	7.94237	6.76166	7.45285	-0.28511	0.775568	0.999748
chr14	68934679	68935472	5522	1700	NA	NA	5.88331	5.51436	5.41337	4.28968	5.27518	-1.19784	0.231007	0.999748
chr14	69731862	69732911	5525	1703	NA	NA	5.97202	4.71733	5.59373	5.12583	5.35223	0.02135	0.982967	0.999748
chr14	69805253	69805956	5526	1704	NA	NA	5.00887	3.85764	4.85312	4.38113	4.52519	0.25994	0.794915	0.999748
chr14	70153354	70154057	5533	1705	NA	NA	5.2168	4.15953	5.22555	5.20305	4.95123	0.7438	0.457016	0.999748
chr14	70180457	70180901	5535	1706	NA	NA	3.61248	3.67915	3.83207	2.45405	3.39443	-0.71075	0.477258	0.999748
chr14	70470203	70471634	5543	1708	NA	NA	5.11658	5.00948	5.47603	4.62512	5.0568	-0.01761	0.985952	0.999748
chr14	70599200	70599924	5549	1710	NA	NA	5.00887	3.85764	4.72998	4.24169	4.45955	0.07433	0.940748	0.999748
chr14	70766333	70767566	5555	1711	NA	NA	5.377	4.08977	5.57953	4.69807	4.93609	0.57313	0.56657	0.999748
chr14	73142512	73143800	5565	1712	NA	NA	5.75584	4.08977	5.75402	5.12583	5.18136	0.73106	0.464762	0.999748
chr14	73384728	73385416	5567	1713	NA	NA	4.95184	2.95388	4.87654	3.40585	4.04703	0.26625	0.790054	0.999748
chr14	73524803	73525297	5571	1714	NA	NA	4.92246	3.77115	5.31396	4.28968	4.57432	0.64326	0.52007	0.999748
chr14	75130558	75130930	5576	1715	NA	NA	3.75264	3.93924	4.50808	3.00706	3.80175	-0.12493	0.900583	0.999748
chr14	75541688	75541985	NA	1716	NA	NA	2.04255	2.95388	3.45041	2.07027	2.62928	0.37056	0.71097	0.999748
chr14	76010600	76011012	5582	1717	NA	NA	4.10623	3.36162	3.73292	3.57032	3.69277	-0.11635	0.907375	0.999748
chr14	76110355	76111149	5584	1718	NA	NA	5.1423	4.28967	5.1507	4.58721	4.79247	0.21626	0.828791	0.999748
chr14	76414048	76415194	5586	1719	NA	NA	6.17253	4.67031	6.26942	5.20305	5.57883	0.44506	0.656287	0.999748
chr14	76488095	76488682	5587	1720	NA	NA	4.053	3.77115	4.24573	3.57032	3.91005	-0.00572	0.995433	0.999748
chr14	76504121	76506421	5589	1722	NA	NA	6.45498	5.7587	6.72777	5.85683	6.19957	0.26219	0.79318	0.999748
chr14	77874772	77875161	NA	1723	NA	NA	3.53694	2.38341	3.8792	2.75689	3.13911	0.50592	0.612923	0.999748
chr14	78536576	78537204	5595	1724	NA	NA	5.2168	4.08977	5.62171	4.89709	4.95634	0.85686	0.391541	0.999748
chr14	79390190	79390957	5600	1725	NA	NA	5.2168	4.28967	5.11177	4.14063	4.68972	-0.1796	0.857472	0.999748
chr14	79480785	79482117	5603	1727	NA	NA	6.57313	5.54074	6.35526	5.84081	6.07749	0.0581	0.953667	0.999748
chr14	99045753	99046636	5631	1729	NA	NA	6.00042	4.35059	6.24264	4.98717	5.39521	0.62118	0.534497	0.999748
chr14	100284322	100286478	5637	1731	NA	NA	6.48544	5.88762	6.31298	5.67	6.08901	-0.27572	0.782765	0.999748
chr14	100353067	100353869	5638	1732	NA	NA	5.377	4.76286	5.33101	3.97438	4.86132	-0.58985	0.555305	0.999748
chr14	100459060	100459727	5639	1733	NA	NA	4.10623	4.35059	4.012	3.57032	4.00978	-0.61815	0.536488	0.999748
chr14	100889797	100890042	5642	1735	NA	NA	3.81792	4.51929	3.3866	3.40585	3.78241	-1.09192	0.274896	0.999748
chr14	101653594	101654231	5645	1737	NA	NA	5.26442	3.85764	5.16978	4.03195	4.58095	0.05632	0.955091	0.999748
chr14	102402075	102402654	5647	1738	NA	NA	4.62702	4.35059	4.89958	3.40585	4.32076	-0.47514	0.634699	0.999748
chr14	102982180	102983391	5651	1741	NA	NA	5.26442	3.77115	5.80372	4.92774	4.94176	1.19875	0.230654	0.999748
chr14	103346344	103347187	5654	1742	NA	NA	5.80497	3.77115	5.60779	4.80101	4.99623	0.58858	0.556159	0.999748
chr14	104522182	104522737	5663	1743	NA	NA	4.55226	2.38341	4.4152	4.03195	3.84571	1.0684	0.285368	0.999748
chr14	105571903	105572767	5670	1744	NA	NA	5.0904	5.11859	4.59534	3.91442	4.67969	-1.2011	0.22974	0.999748
chr14	105732235	105732810	5671	1745	NA	NA	4.62702	3.67915	4.38286	3.00706	3.92402	-0.64765	0.517224	0.999748
chr14	105896722	105897007	5673	1746	NA	NA	3.37284	1.81992	3.24985	3.11755	2.89004	0.8303	0.40639	0.999748
chr14	105897257	105898188	5673	1746	NA	NA	5.97202	4.97119	5.79146	5.17776	5.47811	0.01838	0.985333	0.999748
chr14	115040316	115041289	5681	1749	NA	NA	6.00042	4.01647	6.26942	5.45534	5.43541	1.20721	0.227379	0.999748
chr14	115041754	115042508	5681	1750	NA	NA	4.73237	3.77115	4.4152	3.64602	4.14118	-0.31264	0.754557	0.999748
chr14	115406490	115407940	5685	1751	NA	NA	5.11658	4.84984	5.46062	4.38113	4.95204	-0.08812	0.929782	0.999748
chr14	117008698	117008950	5688	1752	NA	NA	3.61248	3.58087	3.31984	1.83176	3.08624	-1.44321	0.148993	0.999748
chr14	117340590	117341025	5689	1753	NA	NA	3.94024	4.08977	4.20931	3.00706	3.8116	-0.57513	0.56522	0.999748
chr14	118362917	118363856	5695	1754	NA	NA	5.78877	5.25231	4.85312	3.85185	4.93652	-1.65129	0.0987115	0.999748
chr14	118714517	118715074	5698	1756	NA	NA	4.15758	4.22607	4.13359	3.40585	3.98077	-0.59673	0.550703	0.999748
chr14	118719195	118720012	5699	1757	NA	NA	5.00887	5.187	5.11177	3.40585	4.67837	-1.18628	0.23554	0.999748
chr14	118924819	118925537	5701	1758	NA	NA	4.663	3.93924	4.82932	4.19204	4.4059	0.29626	0.767037	0.999748
chr14	119098927	119099866	5704	1759	NA	NA	4.92246	4.15953	5.36452	4.54828	4.7487	0.58727	0.557038	0.999748
chr14	120477206	120478923	5709	1760	NA	NA	7.24788	6.48497	7.74023	6.40652	6.9699	0.29256	0.769864	0.999748
chr14	121034742	121037024	5711	1761	NA	NA	5.73908	4.40904	6.09075	4.83375	5.26816	0.54878	0.583166	0.999748
chr14	121108523	121109052	5712	1762	NA	NA	3.99772	4.08977	3.68067	2.27488	3.51076	-1.50697	0.131851	0.999748
chr14	121797486	121798769	5718	1764	NA	NA	6.13459	4.46522	6.0294	5.68802	5.57931	0.78999	0.429553	0.999748
chr14	122199960	122201147	5723	1765	NA	NA	5.59753	5.1532	5.87521	4.38113	5.25177	-0.34946	0.726751	0.999748
chr14	122255552	122256639	5724	1767	NA	NA	5.44057	4.89143	5.33101	4.46713	5.03254	-0.37736	0.705915	0.999748
chr14	122463902	122464228	5730	1768	NA	NA	3.53694	1.81992	3.45041	3.11755	2.9812	0.85608	0.391977	0.999748
chr14	122464945	122465826	5730	1769	NA	NA	5.00887	3.77115	4.98823	4.03195	4.45005	0.16976	0.865203	0.999748
chr14	122473753	122475738	5731	1770	NA	NA	6.44468	5.43219	6.55714	5.65176	6.02144	0.23469	0.814451	0.999748
chr15	3995423	3996367	5742	1772	NA	NA	6.56365	5.68964	6.981	5.59559	6.20747	0.22852	0.819246	0.999748
chr15	5143403	5144256	5748	1773	NA	NA	4.86184	2.38341	4.85312	4.24169	4.08502	1.30737	0.191117	0.999748
chr15	5185506	5185829	5749	1774	NA	NA	3.75264	2.59961	3.51151	2.88739	3.18779	0.03298	0.973694	0.999748
chr15	6707637	6708796	5753	1777	NA	NA	5.377	3.77115	5.26157	4.28968	4.67485	0.28493	0.775704	0.999748
chr15	8098985	8099334	5759	1780	NA	NA	4.39	2.95388	3.8792	3.78645	3.75238	0.22744	0.820086	0.999748
chr15	8168661	8169430	5761	1781	NA	NA	4.95184	3.93924	5.13137	4.42477	4.6118	0.4701	0.638297	0.999748
chr15	8443631	8445525	5763	1783	NA	NA	5.78877	4.97119	5.80372	5.15203	5.42893	0.13839	0.889933	0.999748
chr15	9070685	9072145	5772	1784	NA	NA	6.09564	5.3148	5.97621	5.20305	5.64742	-0.16341	0.870199	0.999748
chr15	9140277	9141229	5773	1785	NA	NA	5.59753	4.46522	5.81589	5.25232	5.28274	0.71071	0.47728	0.999748
chr15	10540220	10540947	5776	1786	NA	NA	4.76584	3.77115	4.62329	3.71794	4.21956	-0.13837	0.889948	0.999748
chr15	10628061	10628301	NA	1787	NA	NA	2.72586	1.81992	3.09876	1.54586	2.2976	0.06987	0.9443	0.999748
chr15	10628654	10629058	NA	1787	NA	NA	3.18766	3.23808	3.45041	1.18894	2.76627	-1.26271	0.206722	0.999748
chr15	10634054	10634590	5777	1788	NA	NA	3.88038	3.4754	3.73292	3.64602	3.68368	0.01637	0.986938	0.999748
chr15	10981453	10982049	5779	1789	NA	NA	4.43231	3.23808	4.75547	3.97438	4.10006	0.74888	0.453946	0.999748
chr15	11995373	11996243	5783	1790	NA	NA	4.73237	3.4754	5.2072	4.46713	4.47052	1.03664	0.299929	0.999748
chr15	12321044	12321924	5787	1791	NA	NA	5.0904	3.67915	5.53608	4.98717	4.8232	1.23961	0.215149	0.999748
chr15	12514968	12515823	5789	1792	NA	NA	5.50145	4.71733	5.74132	3.97438	4.98362	-0.3556	0.722149	0.999748
chr15	12824184	12825221	5793	1793	NA	NA	5.86797	4.22607	6.29572	5.47623	5.4665	1.18603	0.235639	0.999748
chr15	25284503	25284745	5800	1795	NA	NA	4.053	3.4754	3.24985	3.11755	3.47395	-0.82066	0.411862	0.999748
chr15	25412158	25413805	5803	1798	NA	NA	5.1423	4.15953	5.74132	4.80101	4.96104	0.87685	0.380587	0.999748
chr15	25462113	25463015	5805	1799	NA	NA	4.55226	4.28967	4.92226	3.11755	4.22044	-0.56698	0.57074	0.999748
chr15	25663280	25663506	NA	1800	NA	NA	1.52198	2.38341	3.24985	1.54586	2.17527	0.62933	0.529149	0.999748
chr15	25773885	25774435	5807	1801	NA	NA	5.55986	5.40372	5.0306	3.49042	4.87115	-1.72653	0.0842829	0.999748
chr15	25983927	25985141	5808	1802	NA	NA	5.616	4.01647	5.95437	5.12583	5.17817	1.02333	0.306178	0.999748
chr15	26894797	26895121	5813	1803	NA	NA	3.45722	2.59961	3.51151	2.07027	2.90965	-0.33579	0.737035	0.999748
chr15	26895343	26895936	5813	1803	NA	NA	4.6981	3.36162	4.62329	4.19204	4.21876	0.53411	0.593275	0.999748
chr15	27630360	27631153	5816	1804	NA	NA	4.6981	4.15953	5.36452	4.69807	4.73005	0.85173	0.394385	0.999748
chr15	27779585	27780442	5818	1805	NA	NA	5.1423	4.76286	4.98823	3.64602	4.63485	-0.89834	0.369024	0.999748
chr15	27783235	27784873	5819	1806	NA	NA	4.83054	3.85764	5.13137	4.38113	4.55017	0.58267	0.560131	0.999748
chr15	27797916	27798141	5820	1807	NA	NA	3.08532	1.81992	3.01683	2.27488	2.54924	0.27318	0.78472	0.999748
chr15	31453214	31454006	5828	1808	NA	NA	4.62702	3.58087	5.22555	3.85185	4.32132	0.61462	0.538821	0.999748
chr15	32447790	32448136	5833	1809	NA	NA	3.81792	3.85764	3.68067	2.6134	3.49241	-0.97651	0.328836	0.999748
chr15	32948223	32948457	5837	1810	NA	NA	3.53694	3.36162	3.45041	2.45405	3.20075	-0.70268	0.482271	0.999748
chr15	34442969	34443799	5843	1811	NA	NA	4.92246	2.95388	4.98823	4.19204	4.26415	0.92169	0.356711	0.999748
chr15	35937937	35938225	NA	1814	NA	NA	3.08532	1.81992	3.3866	2.6134	2.72631	0.77384	0.439045	0.999748
chr15	36608905	36609962	5862	1815	NA	NA	6.17253	4.67031	6.2336	5.63328	5.67743	0.72385	0.469176	0.999748
chr15	36792372	36792971	5865	1816	NA	NA	4.95184	4.28967	5.26157	4.54828	4.76284	0.40173	0.687891	0.999748
chr15	36793194	36794537	5866	1817	NA	NA	6.33745	4.84984	6.51299	5.45534	5.7889	0.55209	0.580902	0.999748
chr15	37052881	37053653	5870	1818	NA	NA	4.10623	4.28967	4.78051	4.03195	4.30209	0.29444	0.768427	0.999748
chr15	37135729	37135938	5871	1819	NA	NA	3.75264	2.95388	3.24985	3.22019	3.29414	-0.16716	0.867249	0.999748
chr15	37789073	37789352	NA	1821	NA	NA	3.28322	2.59961	3.17628	2.88739	2.98662	0.12782	0.898291	0.999748
chr15	38298757	38302145	5877	1823	NA	NA	7.53674	6.47132	7.52373	6.38458	6.97909	-0.0705	0.943796	0.999748
chr15	38518065	38519853	5882	1824	NA	NA	6.72551	5.40372	6.7342	5.88834	6.18794	0.3487	0.727326	0.999748
chr15	39943024	39944544	5887	1825	NA	NA	6.25734	5.11859	6.34691	5.65176	5.84365	0.44018	0.659816	0.999748
chr15	42366793	42367027	5891	1826	NA	NA	3.75264	3.23808	3.31984	2.88739	3.29949	-0.55381	0.579723	0.999748
chr15	43282389	43282907	5893	1827	NA	NA	4.76584	3.77115	4.87654	4.19204	4.40139	0.37576	0.707107	0.999748
chr15	44618714	44619836	5897	1828	NA	NA	6.51526	5.08313	6.68862	5.61455	5.97539	0.49818	0.618368	0.999748
chr15	49874612	49874904	5899	1829	NA	NA	4.47341	3.36162	3.57013	1.83176	3.30923	-1.71987	0.0854876	0.999748
chr15	50664698	50665412	5900	1830	NA	NA	4.98064	4.71733	5.11177	3.64602	4.61394	-0.66457	0.506341	0.999748
chr15	50688275	50688938	5902	1831	NA	NA	4.62702	4.08977	4.31593	3.22019	4.06323	-0.83457	0.403982	0.999748
chr15	50888641	50889035	NA	1832	NA	NA	3.61248	2.59961	3.51151	2.88739	3.15275	0.13205	0.894948	0.999748
chr15	50889657	50890579	5905	1832	NA	NA	4.6981	3.77115	5.13137	3.64602	4.31166	0.2178	0.827589	0.999748
chr15	51798450	51799001	5907	1834	NA	NA	5.46115	5.54074	4.89958	3.57032	4.86795	-1.78975	0.0735253	0.999748
chr15	51877310	51877698	5909	1835	NA	NA	4.51337	3.77115	3.73292	3.40585	3.85582	-0.80988	0.418028	0.999748
chr15	51991168	51992041	5910	1836	NA	NA	5.377	4.22607	5.31396	4.08731	4.75109	-0.14264	0.886577	0.999748
chr15	56694449	56694932	5923	1838	NA	NA	4.47341	3.77115	4.05368	3.49042	3.94717	-0.49512	0.620524	0.999748
chr15	57523957	57524313	5924	1840	NA	NA	4.20715	3.93924	3.62646	2.45405	3.55672	-1.46028	0.144245	0.999748
chr15	57694294	57694901	NA	1841	NA	NA	3.81792	2.78759	4.012	3.49042	3.52698	0.63398	0.526107	0.999748
chr15	58076095	58077169	5931	1842	NA	NA	6.97487	5.8246	6.64838	5.74077	6.29716	-0.29003	0.771797	0.999748
chr15	58134485	58135438	5932	1843	NA	NA	5.52118	5.37468	5.92097	5.09914	5.47899	0.08782	0.930019	0.999748
chr15	59647404	59649180	5951	1847	NA	NA	6.72551	6.13278	7.12481	6.31671	6.57496	0.41226	0.680159	0.999748
chr15	59945255	59945675	5952	1848	NA	NA	4.34642	4.35059	4.17195	3.11755	3.99663	-0.9949	0.319809	0.999748
chr15	60822006	60822450	NA	1849	NA	NA	2.97516	3.36162	3.8792	3.11755	3.33338	0.46651	0.640862	0.999748
chr15	60822748	60823371	5953	1849	NA	NA	4.47341	2.95388	4.50808	4.03195	3.99183	0.78655	0.431567	0.999748
chr15	61984270	61984520	NA	1850	NA	NA	3.18766	2.95388	3.17628	2.27488	2.89817	-0.488	0.625562	0.999748
chr15	61984729	61986073	5957	1851	NA	NA	5.67004	5.56665	6.18754	5.43414	5.71459	0.27213	0.785527	0.999748
chr15	63052515	63052904	5963	1852	NA	NA	3.45722	3.77115	3.73292	2.27488	3.30904	-0.86276	0.388289	0.999748
chr15	63997647	63998756	5967	1853	NA	NA	6.33745	4.5714	6.56436	5.27634	5.68739	0.65868	0.510115	0.999748
chr15	64312329	64313178	5969	1854	NA	NA	5.48144	3.58087	4.94459	4.54828	4.63879	0.30435	0.760869	0.999748
chr15	64376954	64377401	NA	1855	NA	NA	3.28322	2.59961	3.8792	2.6134	3.09386	0.43102	0.666467	0.999748
chr15	66888155	66888693	NA	1857	NA	NA	3.45722	3.67915	4.05368	4.28968	3.86993	0.85317	0.393587	0.999748
chr15	68258243	68259372	5980	1858	NA	NA	5.75584	5.1532	6.00836	4.92774	5.46128	0.01913	0.984736	0.999748
chr15	68362453	68363814	5981	1859	NA	NA	6.69976	5.73605	7.04955	6.03635	6.38043	0.45952	0.645871	0.999748
chr15	73067238	73068073	5989	1860	NA	NA	6.19727	5.90804	6.69522	5.51712	6.07941	0.07566	0.939693	0.999748
chr15	73090308	73091151	5990	1861	NA	NA	5.72213	4.76286	5.86354	4.66205	5.25265	0.0287	0.977105	0.999748
chr15	73184725	73185716	5991	1862	NA	NA	5.377	4.01647	5.38099	4.92774	4.92555	0.64695	0.517677	0.999748
chr15	73422729	73423706	5992	1863	NA	NA	5.24081	4.01647	5.83991	4.7332	4.9576	0.9301	0.35234	0.999748
chr15	73731816	73733212	6004	1864	NA	NA	4.663	4.08977	5.60779	4.92774	4.82207	1.26015	0.207646	0.999748
chr15	75841604	75842187	6025	1865	NA	NA	4.663	3.67915	4.82932	4.33613	4.3769	0.58196	0.560607	0.999748
chr15	75908857	75911457	6027	1866	NA	NA	6.48544	5.25231	6.74696	5.75793	6.06066	0.54226	0.587653	0.999748
chr15	75921271	75921839	6028	1867	NA	NA	4.59013	3.93924	4.56684	3.40585	4.12551	-0.39349	0.693966	0.999748
chr15	75940846	75941730	6030	1868	NA	NA	4.663	3.10297	4.72998	3.91442	4.10259	0.62092	0.534665	0.999748
chr15	75969041	75969656	NA	1869	NA	NA	4.10623	3.23808	4.70404	3.316	3.84109	0.47764	0.632915	0.999748
chr15	76069181	76070183	6032	1870	NA	NA	5.06373	2.95388	5.07175	4.03195	4.28033	0.76771	0.442678	0.999748
chr15	76368439	76369444	NA	1871	NA	NA	3.88038	3.23808	4.85312	3.91442	3.9715	1.16566	0.24378	0.999748
chr15	76461183	76463000	6055	1872	NA	NA	5.0904	5.25231	5.987	4.92774	5.31436	0.40435	0.685967	0.999748
chr15	76464796	76466578	NA	1873	NA	NA	4.86184	4.97119	5.31396	4.62512	4.94303	0.07496	0.940245	0.999748
chr15	76522463	76524123	6059	1874	NA	NA	5.616	4.76286	5.87521	4.86576	5.27996	0.25596	0.797989	0.999748
chr15	76710105	76710900	6071	1875	NA	NA	4.59013	3.77115	5.11177	3.91442	4.34687	0.46999	0.638373	0.999748
chr15	76925160	76926133	6078	1876	NA	NA	5.39851	4.76286	5.29671	4.28968	4.93694	-0.40642	0.684441	0.999748
chr15	77298511	77299139	6082	1877	NA	NA	4.98064	4.89143	4.50808	3.49042	4.46764	-1.32434	0.185422	0.999748
chr15	77306410	77307398	6083	1878	NA	NA	6.2216	5.43219	6.38005	5.47623	5.87752	0.14313	0.886191	0.999748
chr15	77358448	77359087	6084	1879	NA	NA	4.15758	4.08977	4.89958	4.14063	4.32189	0.56044	0.575193	0.999748
chr15	77970495	77971258	6093	1880	NA	NA	5.75584	4.35059	5.36452	4.50828	4.99481	-0.16514	0.868835	0.999748
chr15	78899078	78900299	6109	1881	NA	NA	4.59013	4.15953	4.96658	3.91442	4.40766	0.09284	0.926035	0.999748
chr15	78927431	78928626	6112	1882	NA	NA	4.89247	4.5714	5.16978	4.24169	4.71884	-0.03704	0.970454	0.999748
chr15	78982477	78983996	6116	1883	NA	NA	5.31051	4.35059	5.60779	5.22789	5.1242	0.83025	0.406417	0.999748
chr15	79030572	79031180	6118	1884	NA	NA	4.663	4.40904	5.22555	3.91442	4.553	0.04801	0.961708	0.999748
chr15	79108414	79109577	6122	1885	NA	NA	5.24081	3.36162	4.96658	4.58721	4.53905	0.67248	0.501296	0.999748
chr15	79402656	79403532	6134	1886	NA	NA	5.19239	3.77115	5.0306	4.24169	4.55896	0.21824	0.827249	0.999748
chr15	80132941	80134045	6153	1887	NA	NA	5.50145	4.28967	5.50636	5.12583	5.10583	0.59451	0.552183	0.999748
chr15	81062198	81062642	NA	1889	NA	NA	2.72586	2.95388	3.8792	2.75689	3.07896	0.676	0.499057	0.999748
chr15	81399337	81400415	6166	1890	NA	NA	5.80497	5.22002	5.74132	4.28968	5.264	-0.7026	0.48232	0.999748
chr15	81465855	81466930	6168	1892	NA	NA	6.6647	5.08313	6.89188	5.51712	6.03921	0.46735	0.640258	0.999748
chr15	81522517	81523741	6170	1893	NA	NA	4.95184	3.77115	5.0919	4.19204	4.50173	0.39651	0.691739	0.999748
chr15	81585025	81586481	6171	1895	NA	NA	6.09564	4.5714	6.2336	5.25232	5.53824	0.57883	0.562716	0.999748
chr15	81745649	81746046	6175	1897	NA	NA	3.88038	2.129	3.68067	2.75689	3.11174	0.30266	0.762153	0.999748
chr15	81859575	81860177	6180	1898	NA	NA	3.94024	3.36162	4.80512	3.57032	3.91932	0.75887	0.447951	0.999748
chr15	81871698	81872718	6182	1899	NA	NA	5.44057	4.35059	5.49128	4.03195	4.8286	-0.18939	0.849791	0.999748
chr15	82146059	82148128	6189	1900	NA	NA	6.84778	6.26526	7.05982	6.20852	6.59534	0.10978	0.912589	0.999748
chr15	82244125	82244784	6192	1901	NA	NA	4.95184	3.93924	5.11177	4.14063	4.53587	0.2554	0.798423	0.999748
chr15	82353718	82354720	6197	1902	NA	NA	5.16756	4.08977	5.34787	4.42477	4.75749	0.36425	0.715683	0.999748
chr15	82924786	82925100	6199	1903	NA	NA	3.88038	2.38341	3.57013	2.27488	3.0272	-0.29601	0.767227	0.999748
chr15	82983186	82984229	6203	1905	NA	NA	4.83054	3.93924	4.98823	3.91442	4.41811	0.09392	0.925176	0.999748
chr15	83349825	83350616	6209	1906	NA	NA	5.28765	3.58087	5.13137	3.97438	4.49357	0.16769	0.866834	0.999748
chr15	83555337	83556002	6211	1907	NA	NA	4.73237	3.23808	4.59534	3.11755	3.92084	-0.18205	0.855546	0.999748
chr15	83594939	83595471	6214	1908	NA	NA	4.053	3.58087	4.47778	3.49042	3.90052	0.23633	0.813181	0.999748
chr15	83639140	83640202	6216	1909	NA	NA	5.06373	4.67031	5.24367	4.42477	4.85062	-0.04637	0.96302	0.999748
chr15	83665583	83667632	6217	1910	NA	NA	5.63424	5.11859	5.96533	4.98717	5.42633	0.14113	0.887768	0.999748
chr15	83677716	83679263	6218	1911	NA	NA	6.31501	5.61711	5.87521	4.89709	5.6761	-0.81983	0.412334	0.999748
chr15	83683122	83683763	6219	1912	NA	NA	4.053	4.22607	4.28126	3.91442	4.11868	-0.05895	0.952996	0.999748
chr15	84216501	84216874	6230	1915	NA	NA	3.81792	3.58087	3.73292	2.45405	3.39644	-0.85658	0.3917	0.999748
chr15	84853521	84854838	6239	1916	NA	NA	5.06373	3.93924	5.13137	4.03195	4.54157	0.11334	0.909762	0.999748
chr15	84922778	84923754	6241	1917	NA	NA	6.51526	5.00948	6.36357	5.27634	5.79116	0.08141	0.935116	0.999748
chr15	85166645	85167292	6244	1919	NA	NA	4.92246	3.85764	4.28126	3.11755	4.04473	-0.97637	0.328905	0.999748
chr15	88750871	88752281	6268	1921	NA	NA	6.3813	5.3148	6.49041	5.61455	5.95026	0.28901	0.772582	0.999748
chr15	88861319	88864527	6272	1923	NA	NA	6.95324	5.80297	7.24213	6.09154	6.52247	0.40818	0.683149	0.999748
chr15	89075500	89076505	6275	1924	NA	NA	5.50145	4.15953	5.53608	4.38113	4.89455	0.18112	0.856278	0.999748
chr15	89088688	89089344	6277	1925	NA	NA	4.55226	2.38341	4.44683	3.11755	3.62501	0.44441	0.656757	0.999748
chr15	89180269	89181302	6285	1926	NA	NA	5.52118	4.15953	5.66269	4.83375	5.04429	0.5766	0.564222	0.999748
chr15	89355335	89356624	6290	1927	NA	NA	5.89848	4.71733	5.89827	5.07195	5.39651	0.25052	0.802188	0.999748
chr15	89429167	89430496	6292	1928	NA	NA	5.72213	4.76286	6.09075	4.95776	5.38338	0.39833	0.690397	0.999748
chr15	93336059	93336441	NA	1931	NA	NA	3.18766	1.81992	3.73292	3.22019	2.99017	1.37521	0.169098	0.999748
chr15	93336909	93337615	6311	1932	NA	NA	4.76584	3.77115	4.67763	3.49042	4.17626	-0.26079	0.79426	0.999748
chr15	93514034	93514328	6314	1933	NA	NA	3.61248	3.93924	3.83207	3.00706	3.59771	-0.5037	0.614485	0.999748
chr15	93576213	93576813	6317	1934	NA	NA	4.55226	4.08977	4.31593	2.88739	3.96134	-1.01696	0.309197	0.999748
chr15	93903852	93904380	6319	1935	NA	NA	4.76584	5.00948	4.31593	3.22019	4.32786	-1.58279	0.113502	0.999748
chr15	95790119	95791218	6331	1939	NA	NA	5.1423	4.51929	5.2072	4.86576	4.93364	0.29079	0.771221	0.999748
chr15	96285202	96286966	6333	1941	NA	NA	6.18495	5.25231	6.08071	5.32321	5.7103	-0.02357	0.981197	0.999748
chr15	96460109	96461759	6335	1942	NA	NA	6.41334	5.11859	6.41245	5.27634	5.80518	0.11088	0.911712	0.999748
chr15	96641159	96643382	6337	1943	NA	NA	5.48144	4.89143	6.12048	5.25232	5.43642	0.7068	0.479706	0.999748
chr15	96698687	96699243	6338	1944	NA	NA	4.15758	2.59961	4.24573	2.75689	3.43995	0.17349	0.862272	0.999748
chr15	96699655	96700420	6339	1945	NA	NA	4.34642	4.08977	4.78051	3.97438	4.29777	0.22528	0.821769	0.999748
chr15	96709428	96710250	6340	1946	NA	NA	5.616	4.5714	6.11064	4.89709	5.29878	0.57984	0.562034	0.999748
chr15	97276632	97277610	6345	1949	NA	NA	5.28765	4.6217	5.00957	3.40585	4.58119	-1.05599	0.290998	0.999748
chr15	97963804	97964573	6354	1950	NA	NA	4.89247	3.77115	5.24367	4.03195	4.48481	0.4326	0.665317	0.999748
chr15	98003854	98004989	6356	1951	NA	NA	4.59013	3.85764	5.0306	4.50828	4.49666	0.77125	0.440576	0.999748
chr15	98533459	98534682	6362	1952	NA	NA	6.06907	5.04677	6.42044	5.22789	5.69104	0.3764	0.70663	0.999748
chr15	98567361	98568245	6363	1953	NA	NA	5.78877	5.34505	5.80372	4.83375	5.44282	-0.35085	0.725709	0.999748
chr15	98609240	98609986	6365	1955	NA	NA	3.88038	3.4754	4.34978	3.316	3.75539	0.21913	0.826554	0.999748
chr15	98871562	98872540	6374	1956	NA	NA	4.83054	3.93924	5.1507	4.83375	4.68856	0.85859	0.390587	0.999748
chr15	99392391	99393254	6395	1957	NA	NA	5.68761	5.40372	6.05014	5.17776	5.57981	0.09654	0.923097	0.999748
chr15	99456870	99458283	6396	1959	NA	NA	5.63424	4.46522	5.96533	5.12583	5.29765	0.70098	0.483331	0.999748
chr15	99972432	99973403	6413	1960	NA	NA	5.63424	4.01647	5.70254	4.08731	4.86014	0.09836	0.921652	0.999748
chr15	100038450	100039486	6414	1961	NA	NA	5.03656	3.58087	5.00957	4.7332	4.59005	0.79545	0.426369	0.999748
chr15	100468716	100469549	6419	1962	NA	NA	4.79856	3.4754	4.62329	3.78645	4.17093	0.09598	0.923538	0.999748
chr15	101075613	101079591	6434	1966	NA	NA	6.52507	5.5921	6.59997	6.22095	6.23452	0.49744	0.618888	0.999748
chr15	101092587	101093841	6435	1967	NA	NA	4.89247	4.93186	5.29671	4.08731	4.80209	-0.31123	0.75563	0.999748
chr15	101097792	101098670	6436	1968	NA	NA	4.34642	4.01647	4.75547	4.08731	4.30142	0.33922	0.734454	0.999748
chr15	101223840	101225065	6443	1969	NA	NA	5.2168	4.28967	5.60779	4.83375	4.987	0.66095	0.508661	0.999748
chr15	101246075	101246853	6445	1970	NA	NA	5.97202	4.89143	5.95437	4.80101	5.40471	-0.0764	0.939103	0.999748
chr15	101254119	101254753	6446	1971	NA	NA	4.47341	3.85764	4.53776	3.22019	4.02225	-0.4051	0.685411	0.999748
chr15	102073569	102074640	6460	1972	NA	NA	6.31501	4.89143	6.35526	5.01599	5.64442	0.11649	0.907264	0.999748
chr15	102202916	102204308	6469	1973	NA	NA	6.09564	4.807	5.92097	5.15203	5.49391	0.12042	0.904153	0.999748
chr15	102245747	102248351	6472	1974	NA	NA	6.15999	5.84592	6.31298	5.61455	5.98336	-0.0554	0.955822	0.999748
chr15	102248554	102249870	6473	1974	NA	NA	5.70497	5.187	5.29671	4.58721	5.19397	-0.71254	0.476145	0.999748
chr15	102350233	102351074	6480	1975	NA	NA	4.89247	4.01647	4.62329	4.95776	4.6225	0.47509	0.634733	0.999748
chr15	102355541	102356325	6481	1976	NA	NA	4.25508	3.23808	5.18861	3.57032	4.06302	0.89471	0.370963	0.999748
chr15	102376638	102378153	6482	1977	NA	NA	5.2168	4.84984	5.6355	4.19204	4.97355	-0.169	0.865796	0.999748
chr15	102405251	102406827	6483	1978	NA	NA	8.18864	8.2944	8.60288	7.38147	8.11685	-0.3525	0.724471	0.999748
chr15	102470229	102470608	6484	1979	NA	NA	4.59013	4.35059	4.92226	4.19204	4.51376	0.1227	0.902348	0.999748
chr15	102470865	102471274	6484	1979	NA	NA	4.43231	2.38341	4.012	3.11755	3.48632	0.22183	0.82445	0.999748
chr15	102510224	102511139	6485	1980	NA	NA	5.28765	4.67031	5.2072	4.33613	4.87532	-0.29308	0.769468	0.999748
chr15	102516784	102519062	6488	1982	NA	NA	7.45701	7.01366	7.53113	6.28154	7.07084	-0.46511	0.641862	0.999748
chr15	102670704	102672483	6492	1983	NA	NA	6.18495	5.08313	6.38822	5.29997	5.73907	0.29696	0.766507	0.999748
chr15	102998714	103000248	6499	1984	NA	NA	5.91349	5.28389	5.81589	4.80101	5.45357	-0.41032	0.681581	0.999748
chr15	103014196	103015099	6501	1985	NA	NA	5.83681	5.00948	5.00957	4.24169	5.02439	-1.12745	0.259579	0.999748
chr15	103032957	103033293	NA	1986	NA	NA	2.97516	3.10297	3.45041	2.27488	2.95085	-0.2494	0.803055	0.999748
chr15	103035053	103035560	6504	1987	NA	NA	4.053	2.95388	4.17195	3.11755	3.5741	0.19978	0.84166	0.999748
chr15	103215047	103215665	6510	1989	NA	NA	5.1423	5.22002	4.62329	3.71794	4.67589	-1.42861	0.153148	0.999748
chr15	103300819	103301442	6515	1990	NA	NA	4.55226	3.58087	4.56684	3.71794	4.10448	0.10719	0.914637	0.999748
chr15	103303901	103305766	6517	1992	NA	NA	6.83994	6.02478	6.77215	5.82461	6.36537	-0.18941	0.849774	0.999748
chr15	103365338	103366106	NA	1993	NA	NA	3.99772	3.77115	4.34978	3.57032	3.92224	0.1069	0.914874	0.999748
chr15	103366345	103367183	6522	1993	NA	NA	4.20715	4.01647	4.65072	4.19204	4.26659	0.43764	0.661657	0.999748
chr16	4003292	4004310	6538	1994	NA	NA	5.24081	4.807	5.83991	5.29997	5.29692	0.77193	0.440174	0.999748
chr16	4077436	4077945	6539	1995	NA	NA	4.20715	3.4754	4.56684	3.22019	3.8674	0.07385	0.941135	0.999748
chr16	4552641	4553644	6544	1996	NA	NA	4.39	4.5714	4.92226	4.14063	4.50607	0.07173	0.942815	0.999748
chr16	4558080	4559144	6545	1997	NA	NA	5.16756	3.93924	4.98823	4.54828	4.66083	0.30375	0.761326	0.999748
chr16	4559354	4560976	6546	1997	NA	NA	5.41969	4.76286	5.70254	5.34609	5.3078	0.61219	0.540424	0.999748
chr16	4586168	4587094	6547	1998	NA	NA	6.06907	4.93186	6.20614	5.15203	5.58978	0.25252	0.800647	0.999748
chr16	4593930	4596847	6548	1999	NA	NA	6.69108	5.71303	6.91468	5.85683	6.29391	0.2597	0.7951	0.999748
chr16	4651138	4652504	6554	2000	NA	NA	5.63424	5.28389	5.75402	4.14063	5.2032	-0.72345	0.469418	0.999748
chr16	4653266	4653537	6555	2001	NA	NA	3.68426	3.58087	3.62646	3.22019	3.52794	-0.2958	0.767388	0.999748
chr16	4658623	4659295	6556	2003	NA	NA	5.41969	5.11859	5.00957	4.14063	4.92212	-0.98117	0.326534	0.999748
chr16	4683515	4684561	6558	2004	NA	NA	5.35518	4.08977	5.16978	3.91442	4.63229	-0.255	0.798729	0.999748
chr16	4719020	4719671	NA	2005	NA	NA	3.61248	3.23808	4.44683	4.08731	3.84617	1.19005	0.234056	0.999748
chr16	4726181	4727018	6559	2006	NA	NA	5.39851	3.67915	5.26157	4.62512	4.74108	0.57187	0.567423	0.999748
chr16	4879660	4881052	6561	2007	NA	NA	6.61046	5.86692	6.93155	5.77489	6.29596	0.16191	0.871378	0.999748
chr16	4963927	4964857	6563	2008	NA	NA	5.63424	4.28967	5.99772	4.69807	5.15493	0.5456	0.585354	0.999748
chr16	5049370	5050600	6565	2009	NA	NA	5.94305	4.40904	6.17815	5.07195	5.40055	0.63476	0.525601	0.999748
chr16	5255205	5256507	6570	2010	NA	NA	6.13459	5.43219	6.66864	5.57637	5.95295	0.47941	0.631659	0.999748
chr16	8470623	8471329	6574	2011	NA	NA	4.79856	4.35059	5.22555	3.97438	4.58727	0.0359	0.971366	0.999748
chr16	8738838	8739170	6583	2012	NA	NA	4.86184	2.95388	4.24573	3.22019	3.82041	-0.24725	0.804716	0.999748
chr16	8829124	8831144	6584	2013	NA	NA	6.98911	5.96759	7.16815	6.28154	6.6016	0.34848	0.727491	0.999748
chr16	10411784	10412353	6586	2014	NA	NA	5.41969	4.01647	5.72851	4.14063	4.82632	0.30605	0.759569	0.999748
chr16	10784375	10786689	6592	2016	NA	NA	6.45498	5.6417	6.90333	6.22095	6.30524	0.72636	0.467633	0.999748
chr16	10992636	10993335	6595	2017	NA	NA	4.98064	3.67915	5.13137	4.19204	4.4958	0.46909	0.639019	0.999748
chr16	11175470	11176850	6600	2018	NA	NA	5.72213	4.67031	5.60779	4.66205	5.16557	-0.08666	0.930945	0.999748
chr16	11253889	11254854	6602	2019	NA	NA	6.12172	5.04677	5.97621	5.20305	5.58694	0.0076	0.993934	0.999748
chr16	11498676	11498899	6604	2020	NA	NA	3.45722	2.38341	3.31984	1.83176	2.74806	-0.48704	0.626241	0.999748
chr16	13667449	13668341	6611	2021	NA	NA	4.34642	3.77115	4.92226	4.24169	4.32038	0.73964	0.459537	0.999748
chr16	13671642	13672712	6612	2022	NA	NA	4.6981	4.807	4.89958	4.14063	4.63633	-0.32861	0.742455	0.999748
chr16	13818469	13819647	6615	2023	NA	NA	6.18495	5.34505	6.42044	4.98717	5.7344	-0.08652	0.931057	0.999748
chr16	13902769	13903763	6616	2024	NA	NA	5.65225	4.28967	6.13996	4.69807	5.19499	0.63341	0.526481	0.999748
chr16	15052578	15053607	6623	2025	NA	NA	6.20949	5.40372	5.59373	4.46713	5.41852	-1.09729	0.272541	0.999748
chr16	15084478	15085608	6624	2026	NA	NA	5.83681	4.46522	5.07175	4.19204	4.89146	-0.73388	0.463039	0.999748
chr16	15195089	15195892	6625	2027	NA	NA	4.79856	4.5714	5.13137	3.97438	4.61893	-0.18676	0.851852	0.999748
chr16	15221048	15221462	NA	2028	NA	NA	3.28322	2.38341	3.62646	2.45405	2.93678	0.29255	0.769872	0.999748
chr16	15637043	15638133	6628	2029	NA	NA	6.49545	6.20054	6.82124	5.41263	6.23246	-0.32665	0.743938	0.999748
chr16	16302549	16303797	6634	2030	NA	NA	5.616	4.22607	5.26157	4.7675	4.96779	0.13218	0.894844	0.999748
chr16	16358642	16359194	6635	2031	NA	NA	4.6981	3.23808	4.62329	3.91442	4.11847	0.42519	0.670705	0.999748
chr16	16560163	16560503	6636	2032	NA	NA	3.81792	3.93924	4.70404	3.316	3.9443	0.18582	0.852589	0.999748
chr16	16870620	16871207	6637	2033	NA	NA	4.83054	4.01647	5.42929	4.50828	4.69614	0.77086	0.440806	0.999748
chr16	17069474	17070418	6640	2034	NA	NA	5.28765	4.35059	5.42929	4.19204	4.81489	-0.01195	0.990464	0.999748
chr16	17201182	17201526	NA	2035	NA	NA	3.37284	2.129	3.92483	2.75689	3.04589	0.834	0.404301	0.999748
chr16	17232983	17234838	6649	2036	NA	NA	5.70497	4.67031	6.34691	5.32321	5.51135	0.91526	0.360076	0.999748
chr16	17530474	17531411	6654	2037	NA	NA	5.54065	4.6217	5.46062	4.58721	5.05255	-0.08095	0.93548	0.999748
chr16	17722622	17723027	6661	2038	NA	NA	4.34642	2.38341	4.56684	2.75689	3.51339	0.4198	0.674641	0.999748
chr16	17759457	17760285	6662	2039	NA	NA	4.663	3.4754	4.44683	3.64602	4.05781	-0.0322	0.974312	0.999748
chr16	17809372	17810113	6666	2040	NA	NA	4.51337	4.5714	4.94459	4.50828	4.63441	0.26018	0.794728	0.999748
chr16	17828776	17829430	6669	2041	NA	NA	4.89247	3.77115	4.89958	3.64602	4.3023	-0.08342	0.933515	0.999748
chr16	17910947	17911654	6672	2042	NA	NA	4.47341	3.77115	4.80512	3.49042	4.13503	0.03604	0.971253	0.999748
chr16	17921646	17922434	6673	2043	NA	NA	4.62702	4.15953	5.05132	4.69807	4.63398	0.68058	0.49615	0.999748
chr16	17927226	17928913	6674	2044	NA	NA	4.86184	4.97119	5.88679	5.36861	5.27211	1.00541	0.314725	0.999748
chr16	18185741	18186639	6681	2045	NA	NA	4.73237	4.807	5.31396	4.46713	4.83012	0.17086	0.864338	0.999748
chr16	18203534	18204291	6682	2046	NA	NA	5.57882	5.3148	5.56519	4.33613	5.19873	-0.70141	0.483066	0.999748
chr16	18248067	18250025	6685	2047	NA	NA	6.3813	5.4601	6.82124	5.84081	6.12586	0.58008	0.561876	0.999748
chr16	18288842	18289623	6686	2048	NA	NA	5.33302	4.15953	5.85177	4.89709	5.06035	0.88803	0.374547	0.999748
chr16	18498239	18499342	6691	2049	NA	NA	5.06373	4.46522	5.77909	4.89709	5.05128	0.81092	0.417432	0.999748
chr16	18554765	18555911	6692	2050	NA	NA	5.50145	4.51929	5.39727	4.80101	5.05475	0.12549	0.900135	0.999748
chr16	18811203	18812690	6697	2051	NA	NA	5.67004	5.3148	5.90967	5.04424	5.48469	-0.02186	0.982558	0.999748
chr16	20097181	20098368	6702	2052	NA	NA	6.042	5.00948	6.32154	5.32321	5.67406	0.41936	0.674962	0.999748
chr16	20140746	20141494	6703	2053	NA	NA	4.59013	2.78759	4.98823	4.19204	4.1395	1.27415	0.202642	0.999748
chr16	20425945	20426710	6706	2054	NA	NA	4.62702	3.67915	4.96658	3.97438	4.31178	0.4487	0.653656	0.999748
chr16	20498663	20499269	6707	2055	NA	NA	4.6981	3.23808	4.53776	3.64602	4.02999	0.17501	0.861073	0.999748
chr16	20516457	20517934	6708	2056	NA	NA	4.73237	4.28967	5.34787	4.24169	4.6529	0.40115	0.68832	0.999748
chr16	20548153	20549052	6711	2057	NA	NA	5.63424	4.67031	5.90967	4.95776	5.29299	0.39787	0.690733	0.999748
chr16	20651499	20651904	6716	2058	NA	NA	4.10623	2.78759	4.20931	3.64602	3.68729	0.67964	0.496747	0.999748
chr16	20672390	20673567	6717	2059	NA	NA	5.31051	4.15953	5.62171	4.98717	5.01973	0.80499	0.420845	0.999748
chr16	20715698	20718362	6724	2061	NA	NA	6.7084	5.66587	6.94822	6.07794	6.35011	0.46079	0.644956	0.999748
chr16	21210277	21211386	6729	2062	NA	NA	6.3813	5.68964	6.0294	5.20305	5.82585	-0.59269	0.553401	0.999748
chr16	21246048	21246820	6730	2063	NA	NA	4.43231	3.93924	4.4152	4.08731	4.21852	0.09257	0.926244	0.999748
chr16	21869905	21870311	6738	2064	NA	NA	4.79856	4.08977	4.67763	3.316	4.22049	-0.63242	0.527127	0.999748
chr16	22162517	22164060	6741	2065	NA	NA	5.06373	3.58087	5.41337	5.04424	4.77555	1.28153	0.200036	0.999748
chr16	22857327	22858248	6748	2066	NA	NA	6.67355	6.06169	6.53523	5.7234	6.24847	-0.33689	0.736209	0.999748
chr16	23988117	23989174	6755	2068	NA	NA	6.06907	4.93186	5.34787	4.54828	5.22427	-0.78092	0.43487	0.999748
chr16	24392885	24393914	6758	2069	NA	NA	5.75584	4.28967	5.68938	4.86576	5.15016	0.36024	0.718677	0.999748
chr16	26041395	26041926	6761	2070	NA	NA	4.47341	4.93186	4.85312	3.91442	4.5432	-0.45078	0.652155	0.999748
chr16	28930228	28930478	6775	2072	NA	NA	3.81792	2.59961	3.24985	2.75689	3.10607	-0.29037	0.771538	0.999748
chr16	29579235	29579552	6776	2073	NA	NA	3.61248	3.23808	3.73292	2.88739	3.36772	-0.16275	0.870719	0.999748
chr16	29719239	29719506	6777	2074	NA	NA	3.88038	2.129	3.31984	2.75689	3.02153	0.04761	0.962029	0.999748
chr16	29734374	29735912	6779	2075	NA	NA	5.19239	5.1532	5.56519	4.03195	4.98568	-0.52904	0.596787	0.999748
chr16	29893713	29894454	6783	2076	NA	NA	4.10623	4.28967	4.47778	3.49042	4.09103	-0.30232	0.762413	0.999748
chr16	30008364	30009179	6785	2078	NA	NA	5.19239	3.77115	4.82932	4.24169	4.50864	0.07596	0.939449	0.999748
chr16	30020227	30020670	6786	2079	NA	NA	4.20715	3.67915	3.96907	3.11755	3.74323	-0.56525	0.571916	0.999748
chr16	30063183	30064588	6788	2081	NA	NA	5.95761	5.00948	5.88679	5.25232	5.52655	0.12159	0.903223	0.999748
chr16	30064855	30067351	6789	2083	NA	NA	6.51526	5.40372	6.33004	5.41263	5.91541	-0.12463	0.900819	0.999748
chr16	30068037	30068716	6790	2084	NA	NA	5.06373	5.187	4.72998	4.38113	4.84046	-0.80554	0.420528	0.999748
chr16	30069586	30070903	6791	2086	NA	NA	6.2216	4.97119	5.59373	4.50828	5.3237	-0.77103	0.440708	0.999748
chr16	30172839	30173071	NA	2088	NA	NA	3.61248	3.4754	3.24985	2.88739	3.30628	-0.67197	0.50162	0.999748
chr16	30190145	30190750	6793	2090	NA	NA	3.99772	3.85764	3.96907	3.40585	3.80757	-0.3396	0.734164	0.999748
chr16	30236054	30236585	6794	2091	NA	NA	4.39	3.23808	4.24573	3.49042	3.84106	0.07639	0.939106	0.999748
chr16	30387901	30389749	6797	2092	NA	NA	5.26442	4.46522	5.56519	4.89709	5.04798	0.51787	0.604562	0.999748
chr16	30510738	30510941	NA	2093	NA	NA	2.85588	2.78759	3.24985	3.316	3.05233	0.65198	0.514428	0.999748
chr16	30774825	30775746	6806	2095	NA	NA	5.80497	5.43219	5.22555	4.38113	5.21096	-1.1525	0.249142	0.999748
chr16	31131015	31131216	NA	2096	NA	NA	2.85588	2.78759	3.09876	1.54586	2.57202	-0.70605	0.480176	0.999748
chr16	31501306	31502151	6816	2097	NA	NA	4.43231	4.22607	4.44683	2.88739	3.99815	-0.93599	0.349303	0.999748
chr16	31948111	31948668	6823	2099	NA	NA	4.39	3.36162	4.47778	3.91442	4.03595	0.4528	0.650706	0.999748
chr16	32099204	32100072	6826	2100	NA	NA	5.00887	4.08977	5.31396	4.42477	4.70934	0.45245	0.650953	0.999748
chr16	32246578	32247276	6827	2101	NA	NA	5.377	4.15953	5.07175	4.24169	4.71249	-0.15769	0.874703	0.999748
chr16	32332097	32332502	6830	2102	NA	NA	4.39	3.4754	4.24573	3.71794	3.95727	0.06946	0.944623	0.999748
chr16	32430530	32431219	6832	2103	NA	NA	5.0904	3.58087	5.2072	4.24169	4.53004	0.54967	0.58256	0.999748
chr16	32516068	32516612	6834	2104	NA	NA	3.28322	3.93924	4.4152	3.85185	3.87238	0.73837	0.460305	0.999748
chr16	32608685	32609351	6835	2105	NA	NA	5.2168	4.46522	6.0294	4.98717	5.17465	0.94333	0.345535	0.999748
chr16	32877430	32878005	6841	2106	NA	NA	4.76584	3.85764	4.67763	3.71794	4.25476	-0.16111	0.872014	0.999748
chr16	33123894	33124305	NA	2107	NA	NA	2.58294	3.10297	3.68067	3.40585	3.19311	0.99003	0.322182	0.999748
chr16	33380456	33381407	6847	2108	NA	NA	5.0904	4.28967	5.41337	4.50828	4.82543	0.38281	0.701866	0.999748
chr16	33829276	33830455	6850	2109	NA	NA	4.59013	3.58087	5.11177	4.46713	4.43747	0.99518	0.319673	0.999748
chr16	33832683	33833060	6851	2110	NA	NA	3.99772	2.59961	3.68067	3.11755	3.34889	0.14201	0.887078	0.999748
chr16	35982834	35983831	6876	2113	NA	NA	5.39851	3.67915	5.2072	4.33613	4.65525	0.32917	0.742035	0.999748
chr16	36071104	36072351	6878	2115	NA	NA	5.80497	4.15953	5.85177	4.50828	5.08114	0.2796	0.779791	0.999748
chr16	36874622	36875677	6880	2116	NA	NA	6.17253	5.3148	6.49798	5.7234	5.92718	0.51887	0.603864	0.999748
chr16	38452034	38453116	6891	2117	NA	NA	4.79856	3.58087	5.18861	4.58721	4.53881	0.98705	0.323642	0.999748
chr16	38562496	38563396	6894	2118	NA	NA	4.663	4.22607	4.82932	3.11755	4.20899	-0.66599	0.505432	0.999748
chr16	44138795	44140022	6912	2119	NA	NA	5.94305	5.73605	6.07059	5.34609	5.77395	-0.18549	0.852851	0.999748
chr16	44140350	44140589	6912	2119	NA	NA	3.94024	2.59961	3.17628	2.88739	3.15088	-0.33659	0.736431	0.999748
chr16	44172358	44173602	6913	2120	NA	NA	6.14735	5.34505	6.29572	5.17776	5.74147	-0.01337	0.989329	0.999748
chr16	44615712	44616679	6916	2122	NA	NA	4.73237	4.15953	4.80512	3.22019	4.2293	-0.61255	0.540188	0.999748
chr16	45158216	45159365	6924	2125	NA	NA	6.08241	5.00948	6.13996	5.43414	5.6665	0.34085	0.733223	0.999748
chr16	45742619	45743100	6927	2126	NA	NA	5.1423	4.01647	4.80512	4.14063	4.52613	-0.15057	0.880319	0.999748
chr16	45843504	45844754	6929	2127	NA	NA	5.44057	4.5714	5.55071	5.20305	5.19143	0.52433	0.600061	0.999748
chr16	46496194	46498229	6932	2128	NA	NA	6.4652	5.34505	6.62092	5.93436	6.09138	0.52662	0.598468	0.999748
chr16	52031003	52032114	6942	2130	NA	NA	6.34854	5.84592	6.67533	5.55689	6.10667	0.0267	0.978703	0.999748
chr16	52134611	52135259	6943	2131	NA	NA	5.24081	5.11859	5.49128	4.28968	5.03509	-0.40887	0.682644	0.999748
chr16	52350713	52350921	NA	2133	NA	NA	2.97516	1.81992	2.83754	1.83176	2.3661	-0.0889	0.929163	0.999748
chr16	52988719	52989277	6946	2134	NA	NA	4.55226	3.58087	4.38286	2.07027	3.64656	-1.18751	0.235054	0.999748
chr16	55821733	55822623	6952	2135	NA	NA	5.46115	4.15953	5.6355	4.83375	5.02248	0.59982	0.548643	0.999748
chr16	55934186	55934953	6956	2136	NA	NA	5.35518	4.40904	5.87521	4.7332	5.09316	0.59672	0.550711	0.999748
chr16	56029323	56030183	6959	2137	NA	NA	5.616	4.40904	5.66269	4.66205	5.08745	0.21184	0.832235	0.999748
chr16	56075308	56076025	6962	2138	NA	NA	5.0904	3.10297	5.18861	3.71794	4.27498	0.50412	0.614188	0.999748
chr16	56716881	56717924	6963	2139	NA	NA	6.56365	5.54074	6.86872	5.7234	6.17413	0.34475	0.730286	0.999748
chr16	57121065	57122259	6965	2140	NA	NA	5.86797	4.6217	6.35526	4.98717	5.45803	0.60277	0.546674	0.999748
chr16	57606554	57607149	6969	2141	NA	NA	4.20715	3.10297	4.53776	3.316	3.79097	0.38427	0.700783	0.999748
chr16	59639112	59639637	6978	2143	NA	NA	4.73237	3.58087	4.82932	3.91442	4.26424	0.3043	0.760904	0.999748
chr16	63863925	63864268	6993	2145	NA	NA	4.39	2.78759	3.73292	3.11755	3.50702	-0.23122	0.817147	0.999748
chr16	64770718	64771255	6995	2146	NA	NA	4.43231	3.10297	4.28126	3.78645	3.90075	0.37635	0.706665	0.999748
chr16	66920184	66920583	7000	2147	NA	NA	3.45722	3.10297	3.83207	2.6134	3.25141	-0.08109	0.935371	0.999748
chr16	69979995	69980708	7003	2148	NA	NA	4.39	4.35059	4.94459	3.40585	4.27276	-0.27578	0.782719	0.999748
chr16	73096364	73097179	7010	2149	NA	NA	6.09564	5.28389	4.94459	3.85185	5.04399	-1.82586	0.0679008	0.999748
chr16	74093206	74093850	7015	2151	NA	NA	4.59013	4.51929	4.62329	3.49042	4.30578	-0.70381	0.481567	0.999748
chr16	74411231	74412177	7017	2152	NA	NA	5.00887	4.6217	5.36452	4.42477	4.85497	0.11219	0.910674	0.999748
chr16	74412623	74413303	7018	2153	NA	NA	4.62702	4.01647	4.05368	2.75689	3.86351	-1.29561	0.19514	0.999748
chr16	74795613	74796338	7021	2154	NA	NA	5.57882	5.40372	4.75547	4.03195	4.94249	-1.55163	0.120783	0.999748
chr16	76372074	76373861	7027	2155	NA	NA	5.92835	4.51929	5.99772	5.29997	5.43633	0.60086	0.547944	0.999748
chr16	77013314	77014165	7029	2157	NA	NA	5.70497	3.77115	5.36452	4.66205	4.87568	0.38909	0.69722	0.999748
chr16	78576327	78577182	7039	2158	NA	NA	4.663	3.58087	5.1507	4.46713	4.46542	0.97119	0.331478	0.999748
chr16	84834406	84836343	7048	2159	NA	NA	6.58256	5.48748	6.82726	5.7234	6.15518	0.33973	0.734068	0.999748
chr16	85129313	85129896	7049	2161	NA	NA	4.20715	4.46522	4.4152	2.88739	3.99374	-0.96824	0.33295	0.999748
chr16	85549968	85550462	NA	2162	NA	NA	2.58294	3.23808	4.24573	2.88739	3.23853	0.92747	0.353707	0.999748
chr16	85800804	85801710	7052	2163	NA	NA	5.28765	4.67031	5.60779	4.86576	5.10788	0.36445	0.71553	0.999748
chr16	85802013	85803630	7053	2164	NA	NA	5.57882	5.1532	5.82795	5.04424	5.40105	0.09908	0.921077	0.999748
chr16	87092319	87092532	NA	2165	NA	NA	3.08532	2.129	3.09876	2.27488	2.64699	0.11261	0.91034	0.999748
chr16	87454863	87455325	7057	2166	NA	NA	4.15758	3.10297	4.012	3.91442	3.79674	0.47067	0.637886	0.999748
chr16	87495297	87496256	7058	2167	NA	NA	5.0904	3.67915	5.34787	4.38113	4.62463	0.67819	0.497664	0.999748
chr16	87699734	87700281	7060	2168	NA	NA	3.94024	3.36162	4.34978	4.19204	3.96092	0.87648	0.380792	0.999748
chr16	89944406	89945440	NA	2169	NA	NA	4.15758	3.67915	4.59534	4.19204	4.15603	0.67198	0.501611	0.999748
chr16	90386450	90387693	7071	2170	NA	NA	4.92246	3.93924	5.39727	4.7332	4.74804	0.89683	0.369829	0.999748
chr16	90532847	90533558	7072	2171	NA	NA	4.47341	3.67915	4.65072	3.00706	3.95258	-0.34974	0.726541	0.999748
chr16	90629022	90629436	7073	2172	NA	NA	3.99772	3.4754	3.68067	2.27488	3.35717	-1.0727	0.283433	0.999748
chr16	91484688	91485581	7087	2173	NA	NA	5.80497	4.15953	6.13996	5.29997	5.35111	1.04291	0.297013	0.999748
chr16	91646919	91648256	7090	2174	NA	NA	6.10874	5.22002	6.30437	5.17776	5.70273	0.10841	0.91367	0.999748
chr16	91688468	91689254	7091	2175	NA	NA	4.663	3.67915	4.94459	4.42477	4.42788	0.72609	0.467801	0.999748
chr16	91746402	91746719	7093	2176	NA	NA	3.99772	4.15953	3.3866	2.27488	3.45468	-1.76414	0.0777392	0.999748
chr16	92057659	92058756	7095	2177	NA	NA	5.16756	3.85764	5.72851	4.24169	4.74885	0.66797	0.504166	0.999748
chr16	92301074	92302067	7097	2179	NA	NA	4.79856	3.58087	4.80512	3.85185	4.2591	0.19619	0.844468	0.999748
chr16	93263184	93263870	7107	2180	NA	NA	4.95184	5.00948	4.72998	3.57032	4.5654	-1.1741	0.240385	0.999748
chr16	93272213	93272785	7108	2181	NA	NA	5.16756	4.35059	3.78335	2.45405	3.93889	-2.31902	0.0204144	0.999748
chr16	93603612	93604402	7110	2182	NA	NA	5.00887	3.67915	5.41337	4.14063	4.5605	0.61212	0.540471	0.999748
chr16	93831858	93833017	7114	2183	NA	NA	5.68761	3.58087	5.49128	5.17776	4.98438	0.98999	0.322204	0.999748
chr16	94059646	94060257	7119	2184	NA	NA	4.83054	4.807	4.87654	3.85185	4.59148	-0.64264	0.520472	0.999748
chr16	94227576	94227917	7120	2185	NA	NA	3.94024	3.36162	4.012	2.75689	3.51768	-0.37673	0.706379	0.999748
chr16	94312722	94313915	7122	2186	NA	NA	5.41969	4.67031	5.85177	5.15203	5.27345	0.64593	0.518342	0.999748
chr16	94370179	94371808	7123	2187	NA	NA	6.45498	5.22002	6.59997	5.36861	5.9109	0.20752	0.83561	0.999748
chr16	94525993	94527162	7124	2188	NA	NA	6.34854	5.00948	6.64838	5.25232	5.81468	0.3836	0.701282	0.999748
chr16	95469846	95470228	7127	2191	NA	NA	4.30147	3.77115	3.96907	3.22019	3.81547	-0.62441	0.532374	0.999748
chr16	95844906	95845969	7133	2193	NA	NA	4.92246	3.85764	4.92226	3.85185	4.38855	-0.00424	0.996621	0.999748
chr16	95848069	95849226	7134	2194	NA	NA	5.16756	5.28389	5.59373	4.42477	5.11749	-0.30604	0.759583	0.999748
chr16	96081392	96083109	7137	2195	NA	NA	6.19727	4.84984	5.987	5.36861	5.60068	0.21807	0.82738	0.999748
chr16	96127304	96128622	7138	2196	NA	NA	6.6558	5.5921	6.95374	5.74077	6.2356	0.31568	0.752251	0.999748
chr16	97851003	97852349	7151	2197	NA	NA	6.0556	4.71733	5.88679	4.98717	5.41172	0.07141	0.94307	0.999748
chr16	97961721	97963006	7155	2198	NA	NA	6.29222	5.1532	6.22451	5.57637	5.81157	0.25125	0.801622	0.999748
chr17	3114472	3115740	7162	2200	NA	NA	6.39206	4.807	6.62092	5.45534	5.81883	0.62004	0.535244	0.999748
chr17	4497984	4499061	7165	2202	NA	NA	4.663	5.11859	5.16978	4.03195	4.74583	-0.40987	0.681908	0.999748
chr17	4907934	4908737	7166	2203	NA	NA	5.31051	3.77115	4.87654	4.50828	4.61662	0.21428	0.83033	0.999748
chr17	4993967	4994833	7167	2204	NA	NA	4.83054	3.77115	4.75547	4.14063	4.37445	0.2081	0.835157	0.999748
chr17	5189575	5190326	7169	2205	NA	NA	5.44057	4.76286	5.6355	5.12583	5.24119	0.39435	0.69333	0.999748
chr17	5723758	5723958	NA	2206	NA	NA	2.24601	1.81992	3.17628	1.54586	2.19702	0.46385	0.642767	0.999748
chr17	5840933	5841442	NA	2207	NA	NA	3.68426	2.59961	4.05368	3.40585	3.43585	0.83102	0.405984	0.999748
chr17	6106431	6106891	7181	2208	NA	NA	4.92246	3.23808	4.85312	4.08731	4.27524	0.55127	0.581459	0.999748
chr17	6655255	6656147	7185	2209	NA	NA	5.2168	4.28967	5.2072	4.03195	4.68641	-0.18896	0.850129	0.999748
chr17	6827610	6828341	7189	2210	NA	NA	5.35518	4.22607	5.22555	4.69807	4.87622	0.24201	0.808781	0.999748
chr17	6948067	6948981	7190	2211	NA	NA	5.00887	3.23808	4.96658	4.46713	4.42016	0.83886	0.401568	0.999748
chr17	6961546	6961814	NA	2212	NA	NA	3.18766	2.129	3.09876	2.07027	2.62142	-0.10436	0.916886	0.999748
chr17	7945573	7946237	7192	2213	NA	NA	4.86184	3.10297	4.80512	4.50828	4.31955	0.95326	0.340483	0.999748
chr17	8310888	8311414	7194	2215	NA	NA	4.34642	2.95388	4.62329	3.71794	3.91038	0.73579	0.461875	0.999748
chr17	10319499	10320226	7201	2216	NA	NA	4.83054	2.38341	4.65072	3.97438	3.95976	0.99747	0.318561	0.999748
chr17	10335037	10335506	7202	2217	NA	NA	3.99772	3.23808	4.17195	2.88739	3.57378	-0.12473	0.900737	0.999748
chr17	10839731	10840608	7203	2218	NA	NA	5.0904	4.76286	5.47603	4.46713	4.9491	0.06354	0.949336	0.999748
chr17	11926943	11927481	7205	2220	NA	NA	3.53694	2.95388	4.31593	2.75689	3.39091	0.41139	0.680797	0.999748
chr17	12118684	12119911	7207	2222	NA	NA	6.01441	5.54074	6.0604	5.43414	5.76242	-0.04284	0.965827	0.999748
chr17	12318396	12319089	7211	2223	NA	NA	5.44057	3.58087	4.80512	4.38113	4.55192	0.1165	0.907257	0.999748
chr17	12725188	12725718	7214	2224	NA	NA	3.28322	4.15953	4.17195	3.85185	3.86664	0.41072	0.681288	0.999748
chr17	12751339	12751788	7215	2225	NA	NA	3.94024	2.38341	3.78335	2.88739	3.2486	0.24534	0.8062	0.999748
chr17	12960129	12961029	7218	2226	NA	NA	5.65225	5.22002	5.94332	4.83375	5.41234	-0.0673	0.946345	0.999748
chr17	12991852	12992994	7219	2227	NA	NA	6.01441	3.77115	6.00836	5.07195	5.21647	0.91519	0.360112	0.999748
chr17	13663192	13663697	7229	2228	NA	NA	4.47341	3.4754	4.24573	3.49042	3.92124	-0.15032	0.880519	0.999748
chr17	13760111	13760543	7231	2229	NA	NA	4.15758	2.78759	4.17195	3.64602	3.69078	0.61694	0.537288	0.999748
chr17	15395816	15396518	7239	2235	NA	NA	4.92246	4.15953	4.98823	4.03195	4.52554	-0.04369	0.965156	0.999748
chr17	15440533	15441030	NA	2236	NA	NA	3.75264	3.36162	4.13359	3.00706	3.56373	0.01866	0.985113	0.999748
chr17	15657169	15657466	7244	2237	NA	NA	4.43231	3.4754	3.83207	3.40585	3.78641	-0.47345	0.635905	0.999748
chr17	15704362	15705718	7245	2238	NA	NA	5.7724	4.22607	5.83991	4.89709	5.18387	0.52203	0.60166	0.999748
chr17	15808841	15809852	NA	2239	NA	NA	3.81792	3.4754	4.89958	3.64602	3.95973	0.88518	0.376084	0.999748
chr17	15826004	15827101	7246	2240	NA	NA	5.48144	4.51929	5.83991	5.25232	5.27324	0.77153	0.440409	0.999748
chr17	17490939	17491738	7257	2242	NA	NA	4.39	4.40904	4.89958	3.97438	4.41825	0.05295	0.957769	0.999748
chr17	17623763	17625809	7258	2243	NA	NA	6.43431	5.5921	6.75961	5.85683	6.16071	0.41706	0.676642	0.999748
chr17	17826211	17829950	7260	2246	NA	NA	7.06502	6.57707	7.32105	6.1577	6.78021	-0.11546	0.908082	0.999748
chr17	21532223	21532984	7267	2247	NA	NA	3.61248	3.23808	4.31593	3.64602	3.70312	0.78559	0.432128	0.999748
chr17	23563879	23564650	7279	2248	NA	NA	5.2168	3.93924	5.1507	4.92774	4.80862	0.652	0.514414	0.999748
chr17	23598749	23599615	7281	2249	NA	NA	4.79856	4.01647	5.24367	4.83375	4.72311	0.89233	0.372237	0.999748
chr17	23802675	23803895	7292	2250	NA	NA	6.3813	5.22002	6.42838	5.36861	5.84958	0.13831	0.889998	0.999748
chr17	23828705	23829607	7293	2251	NA	NA	5.26442	4.46522	5.07175	4.42477	4.80654	-0.16478	0.869123	0.999748
chr17	24208587	24210341	7304	2252	NA	NA	5.48144	4.6217	5.66269	4.86576	5.1579	0.30064	0.763699	0.999748
chr17	24211767	24212664	7305	2253	NA	NA	4.30147	3.93924	4.82932	3.316	4.09651	-0.06742	0.946245	0.999748
chr17	24414003	24415370	7311	2254	NA	NA	5.65225	4.67031	5.95437	5.07195	5.33722	0.49745	0.618881	0.999748
chr17	24639532	24639936	7326	2255	NA	NA	3.81792	3.58087	3.83207	3.11755	3.5871	-0.31749	0.750876	0.999748
chr17	24849614	24850815	7335	2256	NA	NA	6.34854	5.48748	6.7342	5.70582	6.06901	0.42694	0.669434	0.999748
chr17	25083471	25083860	NA	2257	NA	NA	3.37284	3.4754	4.44683	3.57032	3.71635	0.82624	0.408686	0.999748
chr17	25115637	25116046	7343	2258	NA	NA	3.88038	3.10297	3.83207	3.57032	3.59643	0.2962	0.767082	0.999748
chr17	25187845	25188106	NA	2259	NA	NA	2.24601	2.95388	3.09876	3.00706	2.82642	0.64035	0.521957	0.999748
chr17	25188413	25188977	7345	2259	NA	NA	4.34642	2.129	4.28126	3.40585	3.54063	0.85648	0.39175	0.999748
chr17	25273113	25274328	7348	2260	NA	NA	6.7084	5.5921	6.68862	5.51712	6.12656	-0.06698	0.9466	0.999748
chr17	25415160	25415474	NA	2261	NA	NA	3.53694	3.10297	3.17628	3.57032	3.34662	0.07542	0.939886	0.999748
chr17	25555421	25555806	NA	2262	NA	NA	2.42429	3.4754	3.62646	3.22019	3.18658	0.66936	0.50328	0.999748
chr17	25570274	25571698	7360	2263	NA	NA	5.63424	4.51929	5.93219	5.20305	5.32219	0.69392	0.487748	0.999748
chr17	25593363	25594378	7362	2264	NA	NA	5.94305	5.51436	5.38099	4.7332	5.3929	-0.94946	0.34241	0.999748
chr17	25785283	25785865	7365	2265	NA	NA	4.34642	4.40904	4.67763	3.40585	4.20973	-0.475	0.6348	0.999748
chr17	25791476	25792821	7366	2266	NA	NA	4.663	3.4754	5.1507	4.46713	4.43906	1.04574	0.295708	0.999748
chr17	25941264	25941479	NA	2268	NA	NA	2.24601	3.10297	2.10785	3.40585	2.71567	0.11643	0.907312	0.999748
chr17	25941702	25942093	7378	2268	NA	NA	3.88038	3.10297	3.78335	3.22019	3.49672	0.01427	0.988612	0.999748
chr17	26243813	26244458	7386	2269	NA	NA	4.86184	3.23808	4.80512	3.71794	4.15574	0.2991	0.764869	0.999748
chr17	26252879	26253307	7387	2270	NA	NA	4.10623	2.78759	3.73292	3.57032	3.54927	0.2894	0.772284	0.999748
chr17	26507803	26509409	7389	2271	NA	NA	6.32627	5.187	6.82124	5.41263	5.93678	0.50935	0.610515	0.999748
chr17	26781085	26781396	7392	2272	NA	NA	3.53694	2.38341	3.3866	2.75689	3.01596	0.15773	0.874673	0.999748
chr17	26949334	26949784	NA	2273	NA	NA	3.28322	3.36162	3.62646	3.22019	3.37287	0.14265	0.886568	0.999748
chr17	27039936	27040960	7399	2274	NA	NA	4.30147	3.93924	4.70404	3.85185	4.19915	0.22279	0.823706	0.999748
chr17	27200556	27201348	7404	2276	NA	NA	4.43231	3.93924	4.96658	2.6134	3.98788	-0.55953	0.575815	0.999748
chr17	27422437	27423343	7409	2277	NA	NA	5.24081	4.76286	5.00957	4.14063	4.78847	-0.60328	0.546338	0.999748
chr17	27554992	27557374	7411	2279	NA	NA	6.79201	5.34505	7.10016	5.93436	6.29289	0.63438	0.525851	0.999748
chr17	28140284	28142765	7434	2281	NA	NA	5.7724	5.08313	6.20614	5.01599	5.51941	0.25913	0.795538	0.999748
chr17	28176711	28177719	7439	2282	NA	NA	4.6981	3.67915	5.2072	4.58721	4.54291	1.00173	0.316499	0.999748
chr17	28327533	28329003	7447	2283	NA	NA	5.70497	4.6217	5.94332	5.07195	5.33549	0.48673	0.626457	0.999748
chr17	28522643	28523502	7452	2284	NA	NA	4.47341	4.08977	4.72998	4.50828	4.45036	0.47718	0.633243	0.999748
chr17	28690844	28692650	7456	2285	NA	NA	5.75584	4.807	6.03981	5.29997	5.47565	0.54918	0.582893	0.999748
chr17	28800504	28802019	7457	2286	NA	NA	5.63424	4.15953	5.86354	4.66205	5.07984	0.51729	0.604965	0.999748
chr17	28951962	28952699	7459	2287	NA	NA	5.00887	3.67915	4.70404	4.14063	4.38317	0.11073	0.911831	0.999748
chr17	29007646	29008276	7460	2288	NA	NA	4.15758	2.78759	4.53776	3.78645	3.81734	0.97478	0.329694	0.999748
chr17	29347559	29348268	7465	2289	NA	NA	5.46115	3.77115	4.96658	4.08731	4.57155	-0.12611	0.899647	0.999748
chr17	29397896	29398303	7468	2290	NA	NA	3.88038	2.78759	4.13359	3.00706	3.45215	0.33412	0.738299	0.999748
chr17	29415846	29416626	7469	2291	NA	NA	5.00887	4.28967	5.72851	4.38113	4.85205	0.57333	0.566436	0.999748
chr17	29450993	29451531	7471	2292	NA	NA	4.34642	3.58087	4.24573	3.11755	3.82264	-0.39866	0.690151	0.999748
chr17	29463822	29464370	7472	2293	NA	NA	4.59013	4.15953	4.17195	3.49042	4.10301	-0.76855	0.442181	0.999748
chr17	29490082	29492205	7474	2296	NA	NA	6.83994	5.73605	7.00775	5.97895	6.39067	0.29032	0.771578	0.999748
chr17	30004171	30005450	7486	2297	NA	NA	6.14735	4.807	6.287	5.12583	5.5918	0.32408	0.745887	0.999748
chr17	31511884	31512473	7496	2298	NA	NA	4.39	3.10297	4.53776	4.19204	4.05569	0.87426	0.381998	0.999748
chr17	32165560	32166469	7507	2299	NA	NA	4.59013	3.58087	4.85312	4.33613	4.34006	0.71976	0.471688	0.999748
chr17	32320690	32321752	7510	2300	NA	NA	6.3813	5.25231	6.26055	5.41263	5.8267	0.02797	0.97769	0.999748
chr17	33524031	33524318	7522	2301	NA	NA	3.53694	2.38341	3.45041	3.00706	3.09445	0.37966	0.704204	0.999748
chr17	33908576	33910190	7534	2302	NA	NA	6.23361	5.92816	6.4828	5.32321	5.99195	-0.25147	0.801454	0.999748
chr17	33940374	33941016	7540	2303	NA	NA	4.6981	4.01647	4.62329	3.71794	4.26395	-0.26389	0.791869	0.999748
chr17	33950740	33951911	7541	2304	NA	NA	5.03656	4.93186	5.33101	4.86576	5.0413	0.16141	0.871771	0.999748
chr17	33955290	33956180	7542	2305	NA	NA	5.03656	4.807	5.41337	4.46713	4.93102	0.0261	0.979174	0.999748
chr17	34030165	34033105	7545	2306	NA	NA	6.17253	5.56665	6.5055	5.51712	5.94045	0.20036	0.841207	0.999748
chr17	34118451	34122980	7547	2308	NA	NA	7.55121	6.47132	7.93402	6.93766	7.22355	0.60023	0.548369	0.999748
chr17	34586896	34587917	7551	2309	NA	NA	5.73908	5.00948	6.12048	4.92774	5.44919	0.21182	0.832254	0.999748
chr17	34590869	34594328	7552	2311	NA	NA	6.15999	5.34505	6.56436	5.57637	5.91144	0.44934	0.653199	0.999748
chr17	34894094	34894687	7559	2312	NA	NA	4.83054	3.67915	4.85312	4.19204	4.38871	0.37851	0.705063	0.999748
chr17	34898263	34898552	NA	2314	NA	NA	3.28322	2.38341	3.51151	2.6134	2.94788	0.32394	0.745993	0.999748
chr17	34981751	34982398	7565	2315	NA	NA	4.83054	3.67915	4.53776	3.22019	4.06691	-0.53137	0.595173	0.999748
chr17	35000522	35001710	7566	2317	NA	NA	5.75584	4.5714	5.66269	4.58721	5.14429	-0.05467	0.956406	0.999748
chr17	35058350	35059971	7568	2318	NA	NA	4.76584	4.76286	5.55071	4.19204	4.81786	0.1513	0.879743	0.999748
chr17	35120992	35122111	7571	2319	NA	NA	5.46115	4.51929	6.0294	4.86576	5.2189	0.64658	0.517918	0.999748
chr17	35134830	35135959	7573	2321	NA	NA	5.83681	5.08313	6.11064	4.7332	5.44094	-0.05379	0.957101	0.999748
chr17	35164290	35165570	7574	2322	NA	NA	7.02411	6.35719	7.28213	5.75793	6.60534	-0.24121	0.809399	0.999748
chr17	35241279	35242486	7575	2323	NA	NA	5.19239	4.01647	5.59373	4.14063	4.7358	0.37145	0.710312	0.999748
chr17	35836800	35837618	NA	2324	NA	NA	3.53694	3.58087	4.87654	3.85185	3.96155	1.13845	0.254961	0.999748
chr17	35896880	35898013	7591	2325	NA	NA	4.663	4.15953	5.05132	3.71794	4.39795	-0.03765	0.969967	0.999748
chr17	35916099	35917220	7592	2326	NA	NA	6.6647	6.32719	7.00244	5.47623	6.36764	-0.36278	0.716778	0.999748
chr17	35978938	35980220	7594	2327	NA	NA	5.78877	3.77115	5.80372	5.01599	5.09491	0.89048	0.373229	0.999748
chr17	36271047	36271961	7601	2328	NA	NA	4.95184	4.01647	4.85312	4.95776	4.6948	0.59558	0.551472	0.999748
chr17	36958112	36958822	7604	2329	NA	NA	5.00887	4.35059	5.2072	4.42477	4.74786	0.19262	0.847259	0.999748
chr17	37045457	37046813	7607	2331	NA	NA	5.11658	3.10297	5.49128	5.01599	4.6817	1.61708	0.105893	0.999748
chr17	43990969	43991390	7618	2332	NA	NA	4.30147	3.67915	4.31593	3.00706	3.8259	-0.46485	0.642048	0.999748
chr17	44300668	44301288	7621	2333	NA	NA	4.51337	4.22607	4.94459	3.40585	4.27247	-0.27497	0.783345	0.999748
chr17	44506671	44507254	NA	2334	NA	NA	2.97516	2.78759	4.59534	3.85185	3.55249	1.89751	0.0577899	0.999748
chr17	44776787	44777861	7624	2336	NA	NA	5.46115	4.08977	5.46062	4.66205	4.9184	0.40414	0.686116	0.999748
chr17	45318298	45318710	7628	2339	NA	NA	3.75264	3.4754	4.24573	3.22019	3.67349	0.16815	0.86647	0.999748
chr17	45433147	45434273	7630	2341	NA	NA	5.88331	5.04677	6.10073	5.15203	5.54571	0.22809	0.819582	0.999748
chr17	45548699	45549130	7635	2342	NA	NA	4.25508	2.78759	3.92483	2.75689	3.4311	-0.25514	0.79862	0.999748
chr17	45563622	45564948	7637	2343	NA	NA	5.11658	4.46522	5.5213	4.7332	4.95907	0.4755	0.634441	0.999748
chr17	45572519	45574650	7640	2345	NA	NA	6.6647	5.4601	7.08013	5.74077	6.23643	0.49204	0.622703	0.999748
chr17	45685113	45686670	7644	2346	NA	NA	5.50145	3.77115	5.77909	5.01599	5.01692	1.07616	0.28188	0.999748
chr17	45735596	45737417	7646	2348	NA	NA	4.89247	4.35059	5.36452	4.19204	4.69991	0.2216	0.824628	0.999748
chr17	45929321	45929835	NA	2349	NA	NA	2.85588	3.4754	3.68067	2.45405	3.1165	-0.13894	0.889497	0.999748
chr17	46030837	46033024	7653	2351	NA	NA	5.67004	5.187	6.11064	5.39079	5.58962	0.45549	0.64877	0.999748
chr17	46086359	46087184	7654	2352	NA	NA	4.39	4.35059	4.82932	3.64602	4.30398	-0.1875	0.851275	0.999748
chr17	46327593	46328452	7665	2353	NA	NA	5.48144	4.89143	5.57953	4.50828	5.11517	-0.2015	0.840312	0.999748
chr17	46618496	46619013	7674	2354	NA	NA	4.59013	4.22607	4.31593	3.49042	4.15564	-0.71381	0.475361	0.999748
chr17	46628635	46630622	7677	2355	NA	NA	5.2168	4.76286	5.86354	5.09914	5.23559	0.69485	0.487167	0.999748
chr17	46645299	46646674	7678	2356	NA	NA	5.59753	4.46522	5.92097	4.95776	5.23537	0.57678	0.564102	0.999748
chr17	46857201	46858527	7689	2357	NA	NA	5.24081	3.67915	5.49128	4.24169	4.66323	0.57468	0.56552	0.999748
chr17	46889469	46891474	7690	2359	NA	NA	6.68234	5.8246	6.60698	5.93436	6.26207	0.02432	0.9806	0.999748
chr17	47139481	47140730	7692	2361	NA	NA	5.06373	4.97119	5.6355	4.95776	5.15705	0.39466	0.6931	0.999748
chr17	47141130	47141440	7693	2361	NA	NA	3.81792	3.4754	3.68067	3.22019	3.54855	-0.27741	0.78147	0.999748
chr17	47593070	47594047	7699	2362	NA	NA	5.06373	3.93924	5.29671	4.66205	4.74043	0.67561	0.499307	0.999748
chr17	47594526	47595072	NA	2362	NA	NA	3.28322	2.59961	4.05368	2.88739	3.20597	0.74802	0.454468	0.999748
chr17	47595325	47596158	7700	2364	NA	NA	4.73237	3.77115	4.59534	3.71794	4.2042	-0.13447	0.893033	0.999748
chr17	47610983	47611759	7701	2365	NA	NA	5.24081	4.01647	5.0919	4.24169	4.64772	0.05394	0.956981	0.999748
chr17	47629256	47630075	7702	2366	NA	NA	6.29222	4.807	5.76661	4.66205	5.38197	-0.47399	0.635517	0.999748
chr17	47687651	47688695	7704	2367	NA	NA	5.06373	4.5714	5.2072	4.7675	4.90246	0.24002	0.810316	0.999748
chr17	47923853	47925302	7713	2369	NA	NA	5.89848	5.00948	5.99772	4.89709	5.45069	-0.00929	0.992587	0.999748
chr17	47973771	47975052	7714	2371	NA	NA	4.663	4.5714	5.00957	4.50828	4.68806	0.20035	0.841208	0.999748
chr17	47988782	47989011	7715	2373	NA	NA	3.53694	3.85764	3.68067	3.22019	3.57386	-0.34899	0.727108	0.999748
chr17	47990260	47990546	7716	2374	NA	NA	4.20715	3.58087	3.57013	3.316	3.66854	-0.6375	0.523813	0.999748
chr17	48031241	48032053	7717	2375	NA	NA	4.95184	4.6217	4.87654	4.58721	4.75932	-0.07761	0.938141	0.999748
chr17	48409037	48410735	7722	2376	NA	NA	7.56554	6.81182	7.80573	6.54148	7.18114	-0.02131	0.983	0.999748
chr17	49816684	49817139	7731	2377	NA	NA	4.55226	3.93924	4.38286	2.75689	3.90781	-0.95549	0.339354	0.999748
chr17	51760201	51760652	7739	2378	NA	NA	5.28765	4.76286	4.17195	3.00706	4.30738	-2.02973	0.0424103	0.999748
chr17	51812418	51813802	7741	2379	NA	NA	4.79856	3.58087	5.07175	4.46713	4.47958	0.81957	0.412483	0.999748
chr17	56008216	56009636	7753	2381	NA	NA	5.98629	5.40372	6.21535	5.39079	5.74904	0.15277	0.878582	0.999748
chr17	56074342	56075443	7757	2382	NA	NA	5.24081	4.76286	5.72851	4.98717	5.17984	0.50329	0.614775	0.999748
chr17	56218636	56219294	7766	2383	NA	NA	4.6981	2.78759	5.00957	3.97438	4.11741	1.05905	0.289603	0.999748
chr17	56302349	56305036	7771	2384	NA	NA	6.18495	5.48748	6.78458	5.65176	6.02719	0.53996	0.589236	0.999748
chr17	56325419	56326407	7772	2385	NA	NA	6.26906	5.66587	6.71484	5.79166	6.11036	0.40402	0.68621	0.999748
chr17	56461560	56463475	7781	2386	NA	NA	7.45188	7.03237	8.02851	6.69193	7.30117	0.16695	0.867414	0.999748
chr17	56584037	56585400	7786	2387	NA	NA	6.13459	5.04677	6.76589	5.57637	5.88091	0.82058	0.411906	0.999748
chr17	56626374	56628100	7790	2388	NA	NA	6.39206	5.51436	6.64156	5.82461	6.09315	0.39567	0.69236	0.999748
chr17	56672556	56673850	7791	2389	NA	NA	6.33745	5.51436	6.58583	5.17776	5.90385	-0.06235	0.950283	0.999748
chr17	56764743	56765251	7798	2390	NA	NA	4.25508	3.4754	4.31593	3.91442	3.99021	0.35333	0.723852	0.999748
chr17	56934934	56936007	7801	2391	NA	NA	5.46115	4.67031	5.82795	4.46713	5.10663	0.11566	0.907928	0.999748
chr17	56989739	56990678	7802	2392	NA	NA	5.19239	4.46522	5.39727	4.28968	4.83614	0.02074	0.983453	0.999748
chr17	57010837	57012199	7804	2393	NA	NA	6.06907	5.22002	6.42838	5.12583	5.71083	0.1874	0.85135	0.999748
chr17	62882507	62883510	7820	2397	NA	NA	5.83681	5.04677	5.56519	4.54828	5.24926	-0.54436	0.586208	0.999748
chr17	63863141	63864708	7825	2399	NA	NA	6.35954	4.807	6.86872	5.68802	5.93082	0.98266	0.325797	0.999748
chr17	65612427	65614536	7829	2400	NA	NA	6.72551	5.37468	6.7342	5.96424	6.19966	0.42287	0.672399	0.999748
chr17	65884048	65886113	7833	2401	NA	NA	6.64685	5.51436	6.70179	5.7234	6.1466	0.1866	0.851978	0.999748
chr17	66111422	66111792	7837	2402	NA	NA	4.20715	3.23808	4.05368	3.57032	3.76731	0.12636	0.899451	0.999748
chr17	66416626	66417868	7840	2403	NA	NA	5.72213	4.97119	5.29671	4.19204	5.04552	-0.85145	0.394539	0.999748
chr17	66519493	66520049	7843	2404	NA	NA	3.88038	2.129	4.05368	3.49042	3.38837	1.08482	0.278026	0.999748
chr17	69382155	69384504	7857	2409	NA	NA	6.47535	4.84984	6.7342	6.1316	6.04775	1.08898	0.276189	0.999748
chr17	69417072	69417692	7858	2410	NA	NA	4.79856	3.4754	4.75547	4.38113	4.35264	0.60976	0.542034	0.999748
chr17	70849296	70849981	NA	2412	NA	NA	3.88038	3.58087	4.31593	3.316	3.77329	0.12065	0.903971	0.999748
chr17	70850852	70851686	7862	2413	NA	NA	5.00887	3.77115	4.50808	3.40585	4.17349	-0.6122	0.540419	0.999748
chr17	70852461	70853562	7863	2413	NA	NA	5.31051	4.35059	4.96658	4.19204	4.70493	-0.35518	0.72246	0.999748
chr17	70990490	70991037	7865	2414	NA	NA	4.55226	3.85764	4.65072	4.24169	4.32558	0.34106	0.733067	0.999748
chr17	71474834	71476034	7872	2415	NA	NA	5.89848	4.71733	6.05014	5.15203	5.45449	0.41448	0.678533	0.999748
chr17	74294358	74295791	7885	2416	NA	NA	5.68761	4.01647	5.41337	4.7675	4.97124	0.33702	0.736109	0.999748
chr17	74316107	74316757	7886	2417	NA	NA	5.16756	3.23808	5.05132	4.38113	4.45952	0.72581	0.467974	0.999748
chr17	74338380	74339416	7887	2418	NA	NA	5.55986	4.01647	5.94332	4.7332	5.06321	0.77767	0.43678	0.999748
chr17	74527794	74529352	7890	2419	NA	NA	6.93128	6.16706	7.44761	6.17057	6.67913	0.36745	0.713292	0.999748
chr17	75551558	75552373	7894	2420	NA	NA	5.85248	4.40904	6.32154	5.45534	5.5096	1.07113	0.284137	0.999748
chr17	79020586	79020838	7902	2421	NA	NA	4.15758	1.42604	3.68067	3.00706	3.06784	0.78045	0.435145	0.999748
chr17	79022884	79023259	7903	2422	NA	NA	3.99772	3.58087	3.92483	1.83176	3.3338	-1.28788	0.197818	0.999748
chr17	80061660	80062794	7912	2423	NA	NA	6.09564	4.6217	6.35526	4.95776	5.50759	0.42106	0.673718	0.999748
chr17	80206462	80207782	7913	2424	NA	NA	5.97202	5.51436	6.32154	5.22789	5.75895	0.04457	0.964452	0.999748
chr17	80479624	80480772	7917	2425	NA	NA	5.33302	3.23808	5.05132	4.08731	4.42743	0.40117	0.688307	0.999748
chr17	80482745	80483462	7918	2426	NA	NA	4.43231	4.08977	4.80512	4.03195	4.33979	0.22265	0.823809	0.999748
chr17	80887191	80887975	7921	2427	NA	NA	5.00887	4.807	5.24367	4.03195	4.77287	-0.38188	0.70256	0.999748
chr17	81335977	81336569	7923	2428	NA	NA	4.83054	3.58087	4.38286	3.64602	4.11007	-0.27039	0.786863	0.999748
chr17	83100646	83101453	NA	2430	NA	NA	3.88038	3.58087	4.59534	3.91442	3.99275	0.74115	0.458622	0.999748
chr17	83138786	83139364	7927	2431	NA	NA	3.81792	4.76286	4.17195	1.18894	3.48542	-2.27599	0.022868	0.999748
chr17	83166621	83167578	7928	2432	NA	NA	5.85248	5.96759	5.56519	4.28968	5.41873	-1.3891	0.164832	0.999748
chr17	83178522	83179831	7929	2433	NA	NA	5.80497	5.48748	5.70254	4.58721	5.39555	-0.70876	0.478491	0.999748
chr17	83213779	83215578	7930	2434	NA	NA	5.68761	4.93186	5.79146	5.32321	5.43354	0.35003	0.726323	0.999748
chr17	83221953	83223280	7931	2435	NA	NA	5.35518	4.93186	5.62171	4.69807	5.1517	0.02314	0.981542	0.999748
chr17	83514080	83514960	7937	2437	NA	NA	5.33302	4.71733	5.26157	4.92774	5.05991	0.09823	0.921752	0.999748
chr17	83705792	83706078	7938	2438	NA	NA	3.88038	0	3.3866	3.49042	2.68935	2.11819	0.0341836	0.999748
chr17	83861469	83862905	7940	2440	NA	NA	5.75584	4.89143	6.1687	5.15203	5.492	0.47603	0.634061	0.999748
chr17	83913893	83914238	7941	2441	NA	NA	3.94024	3.85764	3.57013	2.6134	3.49535	-1.14111	0.253851	0.999748
chr17	83927465	83928213	7942	2442	NA	NA	4.6981	4.28967	5.47603	4.50828	4.74302	0.7044	0.481201	0.999748
chr17	83938304	83938829	7943	2444	NA	NA	4.73237	4.71733	3.96907	3.316	4.18369	-1.53007	0.126032	0.999748
chr17	83964296	83964957	7944	2445	NA	NA	5.24081	3.85764	4.47778	3.49042	4.26666	-0.79892	0.424358	0.999748
chr17	84183208	84183743	NA	2446	NA	NA	3.45722	3.23808	3.92483	3.40585	3.5065	0.44912	0.653354	0.999748
chr17	84186429	84186743	NA	2447	NA	NA	3.18766	2.38341	2.92997	3.64602	3.03676	0.71033	0.477517	0.999748
chr17	84187009	84188939	7954	2448	NA	NA	6.90147	5.56665	6.66192	5.65176	6.19545	-0.10917	0.913071	0.999748
chr17	84790185	84791115	7958	2449	NA	NA	5.616	4.67031	5.6761	5.27634	5.30969	0.47086	0.637754	0.999748
chr17	85090187	85090984	7960	2450	NA	NA	5.98629	4.84984	5.38099	4.50828	5.18135	-0.66929	0.503325	0.999748
chr17	85737213	85737651	7965	2451	NA	NA	3.94024	3.67915	4.28126	3.71794	3.90465	0.26847	0.788342	0.999748
[truncated: 2,953 more rows]
