# Supplementary material for: GLI transcriptional repression regulates tissue-specific enhancer activity in response to Hedgehog signaling
Source: eLife. 2020 Jan 28;9:e50670. doi: 10.7554/eLife.50670 (PMC6986877; doi:10.7554/eLife.50670)
Supplement: Figure 4—source data 1. — H3K27ac called peaks with a FDR < 0.05 from two replicates of WT, Shh-/- and Shh-/-;Gli3-/- E10.5 (33–34S) forelimbs. Separate tabs for each genotype include peak coordinates and log2 fold change over input. Additional tabs include a peak summary and differential analysis of WT vs. Shh-/-;Gli3-/-. Differential analysis tab lists peak coordinates, peak type, fold change normalized to input for WT and Shh-/-;Gli3-/- samples and fold change of WT over Shh-/-;Gli3-/-. [file elife-50670-fig4-data1.xlsx]

## Sheet: WT_peaks
Chromosome	Start	End	log2FC_input
chr11	5097550	5100099	6.74514
chr1	58392150	58393899	6.53998
chr9	120127750	120128499	6.49109
chr10	122984500	122986949	6.34668
chr7	128739600	128740599	6.33557
chr4	136310950	136311949	6.33542
chr13	58400450	58403399	6.3259
chr5	33651250	33652699	6.26062
chr16	94568700	94571299	6.2571
chr10	111473200	111474549	6.24601
chr11	120347300	120350949	6.22952
chr14	105176300	105177399	6.22332
chr2	126674250	126676549	6.19348
chr2	153345150	153347149	6.18305
chr7	73556350	73558499	6.16912
chr6	47593950	47595949	6.14972
chr5	99977150	99978999	6.13578
chr9	72661500	72664299	6.12443
chr16	38089000	38090299	6.11217
chr12	110694400	110696449	6.06844
chr7	16400250	16403249	6.05861
chr17	3114050	3115849	6.0473
chr9	18292150	18293649	6.03718
chr11	75732900	75734049	6.03186
chr11	116434150	116435349	5.99747
chr8	8689400	8690599	5.99237
chr5	122500800	122502299	5.99159
chr5	108461250	108462399	5.9831
chr1	180726050	180726749	5.97995
chr7	34652600	34655799	5.97586
chr6	38551400	38552699	5.9721
chr11	98202000	98203449	5.97038
chr17	80060950	80062849	5.9598
chr5	124352550	124355299	5.95662
chr2	130178300	130179699	5.95402
chr5	129020100	129021499	5.94688
chr2	154791000	154792349	5.92618
chr5	142904750	142906799	5.90459
chr12	17544850	17546049	5.88145
chr1	86524750	86529999	5.8613
chr7	123123800	123124949	5.85946
chr7	89979850	89981299	5.85754
chr9	106885550	106887099	5.85691
chr4	133813000	133815149	5.84791
chr10	118867850	118869899	5.84635
chr5	149634750	149637499	5.84204
chr9	119402200	119403699	5.82714
chr16	27388800	27389849	5.8257
chr3	137864500	137866149	5.82472
chr5	149050900	149053849	5.81865
chr16	37867850	37869649	5.81441
chr8	79027700	79031049	5.8063
chr9	25150800	25151699	5.80391
chr1	10993450	10994349	5.80109
chr5	105876500	105877649	5.79822
chr12	87471450	87472399	5.78978
chr19	60226100	60226749	5.78482
chr9	61372350	61374299	5.7834
chr11	62550300	62552099	5.77588
chr7	45215450	45216549	5.77414
chr19	53389750	53391299	5.77185
chr4	34550550	34551799	5.7684
chr1	172148100	172149699	5.76471
chr5	138169950	138172749	5.76468
chr1	178335500	178338599	5.76056
chr9	71484800	71485999	5.75821
chr5	137510050	137511499	5.75575
chr13	23580700	23585999	5.75239
chr1	64532850	64534099	5.74101
chr10	37135950	37140949	5.73034
chr1	133609500	133610349	5.7264
chr2	49451050	49452149	5.72415
chr3	103279500	103281049	5.72082
chr2	153741250	153742149	5.71073
chr6	148944150	148946399	5.70989
chr5	100037850	100039849	5.70234
chr17	46856150	46858799	5.70166
chr15	100227200	100228849	5.69067
chr19	23687000	23688049	5.68833
chr4	46451000	46453399	5.68366
chr14	34501400	34503449	5.68289
chr17	4993700	4997049	5.67774
chr4	86856150	86857399	5.6777
chr11	98026300	98027899	5.67314
chr16	76371800	76373849	5.67276
chr12	55398150	55399499	5.66878
chr5	147429850	147431749	5.66702
chr17	34119600	34123099	5.66549
chr19	5799750	5803649	5.65727
chr4	42999100	43000499	5.64592
chr13	21808950	21810199	5.64483
chr11	74723350	74724999	5.64246
chr11	109650400	109651999	5.63943
chr17	65612400	65613949	5.6368
chr19	60789400	60791149	5.63362
chr4	83485700	83487099	5.63324
chr11	49711700	49713399	5.62756
chr6	72898300	72900699	5.62392
chr7	16046250	16048149	5.62392
chr10	91170000	91172399	5.62308
chr7	30956100	30957699	5.61932
chr7	126199700	126200549	5.61967
chr2	20967700	20969699	5.61485
chr10	117375650	117376999	5.60786
chr6	47453400	47455349	5.60658
chr9	88480850	88482649	5.60245
chr10	115383800	115384749	5.59763
chr15	64381950	64383199	5.59504
chr3	142880700	142882049	5.59034
chr2	157565700	157567049	5.58836
chr17	27622200	27623549	5.58793
chr17	35241800	35243549	5.57744
chr3	88949800	88951399	5.57726
chr19	21272200	21273399	5.5775
chr9	72110550	72112199	5.57536
chr17	30003900	30005849	5.56621
chr17	27554600	27558449	5.55996
chr6	72438500	72440799	5.55816
chr13	75942850	75944249	5.55778
chr19	57609850	57611449	5.55607
chr7	16613900	16615299	5.55574
chr12	8673700	8675549	5.55396
chr18	7608550	7609949	5.55314
chr11	105181450	105182849	5.55049
chr10	128035600	128036599	5.54831
chr5	77265450	77267199	5.54531
chr10	4387000	4388799	5.54448
chr11	59809700	59810699	5.54391
chr10	96616950	96618299	5.54287
chr5	90364850	90367499	5.54261
chr5	96160550	96163099	5.53841
chr6	49263000	49264499	5.5377
chr14	65097500	65098099	5.53615
chr2	119477050	119477999	5.53454
chr1	162739500	162740549	5.53209
chr2	162930650	162932549	5.52798
chr12	101975000	101976649	5.52517
chr2	170130150	170131199	5.52439
chr11	50291200	50292349	5.52032
chr2	152396450	152398499	5.52
chr4	8690450	8692449	5.51887
chr11	51605350	51607499	5.51673
chr2	31759850	31761699	5.51524
chr18	73572750	73574949	5.51462
chr4	129513600	129514849	5.51398
chr10	119238700	119240549	5.51343
chr1	51915100	51916149	5.51233
chr10	80797500	80799599	5.51224
chr6	128437400	128439299	5.51128
chr1	58423150	58424149	5.50933
chr3	34019500	34021149	5.50881
chr3	69316200	69316849	5.50744
chr2	180920350	180920949	5.50516
chr13	58126500	58129799	5.50465
chr3	89418500	89419499	5.50312
chr11	87448300	87448749	5.49734
chr7	44816250	44817399	5.48829
chr16	33966200	33967349	5.48872
chr1	10037500	10038799	5.4857
chr8	105635800	105638049	5.47959
chr10	36974150	36975549	5.47897
chr11	11808250	11810549	5.47838
chr14	52196200	52197849	5.47635
chr4	127021300	127022849	5.47177
chr3	138527200	138528449	5.47171
chr8	11554650	11558049	5.46889
chr6	136827400	136828199	5.46856
chr10	29361400	29362549	5.46423
chr15	51990600	51991799	5.45937
chr4	120824800	120825749	5.45439
chr7	127966450	127968899	5.45348
chr10	84533000	84534549	5.45007
chr3	122618450	122620299	5.44554
chr13	104816600	104817899	5.44566
chr2	6322250	6323649	5.44516
chr10	116580400	116582549	5.44477
chr13	103919050	103921899	5.44275
chr13	17943650	17944899	5.44178
chr16	78375750	78376749	5.4315
chr13	21831100	21834899	5.43049
chr5	123141250	123143049	5.42955
chr6	51467700	51471849	5.42502
chr18	42511400	42512699	5.42435
chr5	136565750	136567649	5.42376
chr8	111535900	111537499	5.42277
chr4	117914950	117915649	5.42107
chr2	4881300	4883149	5.41974
chr11	97781500	97782349	5.41543
chr5	123138350	123141199	5.41535
chr8	70283000	70283949	5.4126
chr12	108792000	108792799	5.41273
chr17	42875750	42876749	5.4119
chr19	21653150	21654099	5.41047
chr4	116220250	116222449	5.41216
chr5	34336350	34337699	5.40499
chr9	44603750	44605999	5.40323
chr11	23255750	23257849	5.40024
chr2	84741850	84742499	5.39313
chr1	82316550	82317299	5.39305
chr17	57030700	57031599	5.39207
chr13	9093850	9094749	5.38809
chr18	84084350	84088749	5.38823
chr11	99229450	99231449	5.38798
chr11	72607000	72608699	5.38722
chr19	7039050	7040049	5.38702
chr10	86704600	86705499	5.38531
chr5	106695550	106697199	5.38459
chr9	52047550	52049199	5.38274
chr19	16132200	16133799	5.37734
chr5	65762750	65765099	5.37268
chr11	106787050	106789849	5.37225
chr4	129188550	129189599	5.37158
chr5	50057650	50059499	5.37138
chr9	45983850	45985249	5.37095
chr7	90129350	90131649	5.37055
chr2	84742750	84743799	5.36911
chr3	152209350	152212099	5.36862
chr8	41239650	41240849	5.36888
chr5	140648150	140649049	5.36768
chr3	95658100	95660599	5.36569
chr6	11925800	11926599	5.36566
chr8	84197150	84199699	5.36329
chr3	132683300	132684499	5.36328
chr5	24841500	24842649	5.36284
chr19	55741950	55744449	5.36174
chr15	34082600	34083499	5.35987
chr12	52604550	52604949	5.35705
chr11	21238400	21239949	5.35656
chr1	78657850	78658749	5.35641
chr16	87495050	87495899	5.35561
chr2	30657650	30660549	5.3534
chr6	83455500	83457299	5.35034
chr4	114986450	114987699	5.34967
chr1	63113050	63114849	5.34877
chr1	84838250	84839849	5.34859
chr12	70974550	70975749	5.34718
chr12	31948600	31950249	5.34482
chr19	40830800	40831999	5.3424
chr5	138085050	138085749	5.34028
chr18	79107900	79110499	5.33958
chr1	55026400	55027599	5.33773
chr2	80580300	80581449	5.3366
chr4	135856100	135857399	5.33587
chr14	76413900	76416299	5.3355
chr13	119428300	119430299	5.33504
chr6	31398650	31399599	5.33394
chr8	74993550	74994449	5.33385
chr11	104440550	104442999	5.33155
chr5	9160900	9162449	5.32104
chr9	59485500	59486749	5.32078
chr14	115040150	115043149	5.32262
chr2	156196650	156197449	5.31794
chr18	14681800	14683399	5.31742
chr5	28316500	28318099	5.3174
chr4	34882250	34883299	5.31682
chr3	148987150	148990999	5.31517
chr7	70358050	70361749	5.31394
chr14	105895200	105897049	5.31379
chr19	38930500	38931849	5.31258
chr5	52189550	52190599	5.31337
chr1	153486450	153487749	5.31194
chr18	56707700	56709249	5.31015
chr8	47675400	47675999	5.31069
chr16	45742500	45743299	5.30962
chr3	31093750	31096149	5.30553
chr11	94211450	94212699	5.3043
chr7	46795750	46796649	5.30439
chr7	111081300	111083049	5.30318
chr3	88621000	88622049	5.30109
chr15	73183300	73185499	5.29979
chr1	178405450	178406999	5.30019
chr15	102470450	102471499	5.299
chr12	52503800	52505299	5.29855
chr4	107367700	107368649	5.29866
chr2	72978200	72980449	5.29764
chr10	77605700	77606949	5.29284
chr7	81933350	81934699	5.29297
chr13	23761400	23764699	5.29185
chr3	157533900	157535249	5.29086
chr13	46726500	46727999	5.28885
chr16	44138600	44140899	5.2864
chr8	109564950	109565799	5.28506
chr9	13748800	13749999	5.28221
chr16	30062900	30064199	5.28133
chr4	72199600	72200999	5.27908
chrX	8096500	8096999	5.27905
chr2	125122500	125123799	5.27119
chr2	90940000	90941299	5.26957
chr14	24245200	24245999	5.26878
chr6	86523950	86527699	5.26808
chr5	44100150	44101899	5.26694
chr15	100615550	100616549	5.26536
chr5	23432150	23435999	5.26467
chr2	15055250	15056199	5.26111
chr1	143702200	143702899	5.25909
chr9	31279500	31282049	5.26016
chr8	70509300	70511249	5.25836
chr13	29983450	29985949	5.25691
chr4	15957850	15958699	5.25675
chr1	166001350	166002549	5.25528
chr2	60124050	60125899	5.25492
chr17	34591950	34593349	5.25474
chr13	47104750	47106849	5.25399
chr5	144255250	144256949	5.25393
chr14	104521800	104522749	5.25288
chr1	55086750	55089649	5.24726
chr15	36792500	36794749	5.24679
chr16	4789950	4790599	5.24625
chr3	110249650	110251149	5.24525
chr2	156179000	156180299	5.24352
chr18	6240750	6241549	5.2434
chr17	56303350	56304149	5.2396
chr9	115308750	115310499	5.24115
chr11	87986750	87987549	5.23903
chr2	173000100	173001049	5.23821
chr10	80622650	80624249	5.23717
chr18	75000450	75001899	5.23445
chr14	87415900	87417649	5.23362
chr3	121425800	121428399	5.23325
chr4	130663350	130664649	5.23284
chr1	180812050	180814549	5.23327
chr18	46596800	46597499	5.22831
chr8	57511850	57513199	5.22728
chr4	135872550	135873899	5.22727
chr11	80383200	80384199	5.22677
chr5	129725050	129725499	5.22637
chr14	14012500	14013449	5.22562
chr6	113377200	113378949	5.22241
chr12	85374050	85374999	5.2208
chr11	69948400	69949049	5.21879
chr4	133751850	133755349	5.21741
chr15	85206000	85206749	5.21691
chr6	71831350	71831749	5.21615
chr13	48546000	48546599	5.21556
chr2	75659200	75660949	5.21493
chr17	28177100	28177699	5.21403
chr19	6363750	6365149	5.21356
chr15	96461200	96461849	5.21149
chr19	14596450	14598099	5.20984
chr11	94320750	94322649	5.20725
chr9	103364050	103365799	5.20512
chr6	113075550	113078799	5.20558
chr6	116628250	116629049	5.20431
chr6	85452100	85453049	5.20303
chr10	26373250	26375899	5.20264
chr3	90476150	90476649	5.20181
chr10	40300400	40302049	5.2022
chr12	26414400	26415349	5.20021
chr3	86141450	86142649	5.20044
chr19	41829650	41830449	5.19765
chr5	134638250	134639449	5.19602
chr9	62341050	62344749	5.19658
chr10	53596900	53598299	5.19581
chr12	80945500	80946149	5.19437
chr8	85036850	85038499	5.1956
chr4	155601100	155602349	5.19303
chr8	33641250	33642449	5.19178
chr11	33513200	33513799	5.18987
chr4	136601650	136602849	5.19023
chr6	67267000	67268649	5.18958
chr5	76303650	76305149	5.19006
chr13	98925250	98926849	5.18588
chr8	71381000	71381999	5.18556
chr6	37870750	37872199	5.18365
chr3	95929150	95930549	5.18343
chr5	115429450	115430799	5.18328
chr11	120597250	120599149	5.18146
chr15	81585350	81586849	5.18107
chr17	29032600	29034199	5.18078
chr11	106159050	106161699	5.18047
chr7	28350650	28351549	5.17922
chr14	21831200	21832249	5.17915
chr1	64121750	64122749	5.17863
chr1	6214150	6215399	5.17886
chr13	55692650	55694399	5.17807
chr12	76369000	76371549	5.17708
chr2	160646000	160647249	5.17413
chr2	167063200	167064899	5.1733
chr13	51100800	51101849	5.17377
chr8	128685050	128686549	5.17266
chr11	69995750	69997749	5.17312
chr16	22264450	22266649	5.17247
chr11	103132050	103132899	5.17087
chr4	123663850	123665749	5.1699
chr5	124482500	124484149	5.1688
chr2	69822600	69823549	5.16881
chr19	5489250	5491699	5.16876
chr2	131262400	131263349	5.16676
chr9	25252600	25253449	5.16589
chr4	155491300	155493049	5.16472
chr3	32397100	32398099	5.16142
chr16	17200700	17201649	5.16091
chr10	82762900	82763999	5.16143
chr17	25272150	25273899	5.16118
chr19	8967150	8968299	5.15958
chr11	6527100	6528749	5.15802
chr9	69397850	69398499	5.15549
chr14	49172200	49173249	5.15513
chrX	42149350	42150549	5.15389
chr3	135438300	135440149	5.15347
chr13	23575650	23577449	5.15366
chr17	29614900	29615499	5.14892
chr8	123042550	123043499	5.14789
chr19	30029850	30031949	5.14768
chr13	23751100	23753699	5.14385
chr9	80066550	80068399	5.14139
chr3	107695650	107696599	5.13561
chr10	69352000	69352949	5.13481
chr4	40721600	40723749	5.13511
chr11	116842550	116843399	5.13271
chr9	109094700	109096349	5.12997
chr18	13969350	13972749	5.1298
chr16	90385900	90387199	5.12936
chr11	120989950	120991349	5.12897
chr6	71271500	71272699	5.12775
chr1	179802800	179803849	5.12589
chr5	150664800	150665699	5.12625
chr7	110613600	110615499	5.12442
chr13	23620550	23622599	5.12117
chr7	109174600	109175449	5.12098
chr9	8002950	8005299	5.12038
chr7	126976050	126976999	5.11961
chr7	133121100	133125099	5.11897
chr11	75679200	75679949	5.11819
chr6	42265050	42266099	5.11818
chr8	111642900	111643949	5.11784
chr2	78868100	78870249	5.11633
chr18	22343350	22345399	5.11633
chr19	10524850	10526149	5.11366
chr12	69168500	69169249	5.11282
chr7	121033850	121035749	5.11277
chr15	98662100	98662949	5.11291
chr11	59227200	59228299	5.11264
chr1	36368500	36369199	5.10917
chr15	9071250	9072399	5.10722
chr12	84996250	84997499	5.10976
chr15	80133050	80134249	5.10652
chr12	70824750	70825349	5.1058
chr9	101073950	101075499	5.10459
chr13	56134550	56135999	5.10446
chr13	98814450	98815249	5.10228
chr19	5609500	5610699	5.10192
chr6	29735050	29736699	5.10019
chr6	65042350	65043549	5.09861
chr8	20424050	20424699	5.09802
chr7	46919100	46920499	5.09774
chr3	27153100	27153899	5.09657
chr3	65528400	65529849	5.0965
chr9	40801200	40802749	5.09512
chr18	10725500	10726699	5.09524
chr14	48446050	48446849	5.09501
chr11	26210000	26210999	5.09242
chr16	64852000	64853199	5.09032
chr6	49213450	49215549	5.08759
chr4	137993500	137994499	5.08858
chr8	83608200	83609099	5.08811
chr2	104815750	104817499	5.08719
chr11	116851950	116853099	5.08673
chr15	77970050	77971549	5.08643
chr10	7955300	7957149	5.08642
chr3	89998750	89999449	5.08462
chr1	34841900	34842999	5.08438
chr1	155972650	155973299	5.0805
chr8	11634600	11635749	5.08012
chr4	103214350	103215449	5.07896
chr3	96237450	96240299	5.07895
chr6	100286300	100287499	5.0784
chr5	86804250	86805299	5.0786
chr6	86404200	86405849	5.07805
chr11	17159250	17160399	5.07707
chr11	60105000	60106999	5.07471
chr9	72531650	72533099	5.07193
chr4	132210650	132212099	5.07158
chr5	134312500	134314849	5.06637
chr8	87957800	87960499	5.06194
chr13	3610100	3611099	5.0617
chr11	69980750	69981799	5.05949
chr13	9763600	9765849	5.05896
chr5	93267200	93268499	5.05855
chr1	86703450	86704299	5.05597
chr18	35562100	35563649	5.05405
chr5	142960350	142962899	5.05383
chr5	93205450	93206799	5.05398
chr3	69043550	69044749	5.05358
chr10	108161400	108163449	5.05307
chr15	101283950	101284799	5.05292
chr2	154569250	154569849	5.0528
chr2	59611150	59613649	5.05233
chr5	75043650	75044699	5.05202
chr3	66979550	66982249	5.05202
chr4	48584600	48586699	5.04966
chr12	105784600	105785649	5.04904
chr7	44985650	44986449	5.04868
chr9	78480350	78481699	5.04828
chr14	56811900	56812999	5.04794
chr9	66946100	66946599	5.04775
chr5	113771050	113772499	5.04772
chr11	96004300	96005949	5.0416
chr12	83950600	83951349	5.04137
chr17	88063900	88066149	5.04095
chr7	6154850	6156199	5.04064
chr11	87442850	87443299	5.0401
chr10	7680550	7682099	5.03982
chr12	98746950	98747849	5.0381
chr19	3767250	3768849	5.03794
chr4	150281550	150282649	5.0352
chr8	70698900	70700699	5.03525
chr8	86745150	86746099	5.0344
chr2	26139750	26140499	5.03409
chr1	85793450	85794649	5.03419
chr13	21810350	21812549	5.03353
chr3	27710000	27711249	5.03308
chr1	38128950	38129799	5.03278
chr5	93092850	93095049	5.02994
chr12	69296550	69297699	5.03052
chr1	156558550	156559499	5.02478
chr3	153911900	153912949	5.02472
chr1	178317800	178319799	5.02397
chr9	53666600	53667549	5.02517
chr11	50377700	50378799	5.02278
chr8	25841000	25841749	5.02158
chr4	131873550	131874499	5.02089
chr16	22161500	22163499	5.02088
chr11	120233350	120235249	5.02086
chr19	10895250	10895899	5.02104
chr11	60699700	60700449	5.02104
chr1	20819650	20820299	5.02043
chr12	91587900	91589999	5.02045
chr11	29547200	29548299	5.01967
chr13	98316000	98317649	5.01953
chr13	3538000	3539199	5.01951
chr1	13589100	13589849	5.01934
chr1	160212050	160212849	5.01943
chr4	140701400	140703499	5.01823
chr6	142387200	142387999	5.01769
chr7	126791750	126792549	5.01706
chr15	80798600	80799899	5.01684
chr8	23207750	23208599	5.01684
chr17	24168300	24169949	5.0171
chr5	137350100	137351349	5.0162
chr6	88898050	88898749	5.01511
chr15	79441100	79442399	5.01175
chr3	122293000	122294099	5.01143
chr8	123102250	123103799	5.00848
chr7	46845050	46846899	5.00794
chr4	148625700	148627149	5.00639
chr7	122969950	122971149	5.00637
chr1	119836450	119837449	5.00598
chr7	82866350	82867099	5.00586
chr11	52098750	52099849	5.00485
chr16	18876800	18877849	5.00472
chr14	50930250	50930899	5.00399
chr3	79591350	79592099	5.00279
chr15	37006600	37008299	5.00282
chr18	35829750	35831699	5.00292
chr8	108703700	108705449	5.0018
chrX	71555950	71557649	5.00094
chr18	34506200	34507349	4.99957
chr1	30948600	30950899	4.99925
chr10	120473950	120477899	4.99844
chr17	10317550	10320449	4.99846
chr2	94406150	94407299	4.99719
chr18	35771450	35772699	4.99762
chr12	57230400	57231249	4.99675
chr19	8723450	8725449	4.99595
chr18	35887400	35889999	4.99519
chr18	33462300	33464849	4.9955
chr3	37312450	37312999	4.99496
chr5	92082650	92083849	4.99466
chr7	28179350	28180749	4.99405
chr8	69973600	69974199	4.99448
chr7	13023300	13025849	4.99342
chr15	101077550	101078999	4.99222
chr4	100776600	100778149	4.98915
chr1	176813300	176814149	4.98908
chr17	31658000	31658799	4.98913
chr14	73142500	73144199	4.98858
chr10	80397800	80399549	4.98711
chr8	84183300	84184249	4.98696
chr9	22307050	22307699	4.98656
chr1	13372550	13374799	4.98261
chr6	115675350	115676549	4.98116
chr13	91461100	91462299	4.98064
chr8	22859500	22860249	4.97958
chr1	151499850	151500949	4.9763
chr4	33247300	33248549	4.97554
chr16	48993250	48994099	4.97297
chr10	84440700	84441749	4.97072
chr9	95511000	95512499	4.97078
chr5	88675000	88676199	4.97065
chr18	75367300	75370049	4.96888
chr15	102073850	102075249	4.96891
chr11	102817900	102819649	4.96486
chr8	105170550	105171799	4.96304
chr2	174329050	174331749	4.96262
chr8	18950000	18951699	4.96217
chr14	21986800	21987949	4.962
chr16	8830050	8831349	4.96157
chr2	3118400	3119349	4.96068
chr7	112022850	112024299	4.95844
chr15	66577550	66578299	4.95812
chr10	80560850	80561949	4.95814
chr8	126944700	126945849	4.95786
chr14	52019750	52020699	4.95761
chr10	112928300	112929399	4.95564
chr2	164878450	164879899	4.95169
chr10	82629800	82630649	4.9491
chr2	103795800	103798349	4.94811
chr17	71001550	71002849	4.9473
chr10	99263250	99266749	4.94327
chr1	75505350	75506499	4.94272
chr6	92091300	92092249	4.94281
chr6	71439800	71440549	4.94104
chr12	87442500	87444049	4.94111
chr6	133105100	133105749	4.94038
chr1	134560150	134561799	4.94032
chr1	23921700	23922299	4.94015
chr14	55824800	55825849	4.93738
chr13	48545100	48545849	4.93651
chr13	80883300	80887199	4.93649
chr2	152669450	152670549	4.93553
chr9	21546900	21548049	4.9354
chr3	16183150	16184149	4.93493
chr11	104549550	104550549	4.93466
chr15	9070350	9070949	4.93493
chr4	129640200	129641149	4.93221
chr3	119781800	119783799	4.93218
chr5	142814700	142817649	4.93135
chr11	52396350	52397249	4.92999
chr2	90744700	90745249	4.92747
chr12	84192750	84193999	4.9279
chr5	102069050	102070499	4.92746
chr15	96709850	96710899	4.92765
chr2	64097350	64099249	4.92606
chr13	86045800	86046799	4.92475
chr4	106910400	106913599	4.92314
chr5	142821950	142824149	4.92232
chr6	124917050	124919699	4.92175
chr4	135855100	135855999	4.91904
chr7	131560350	131560999	4.91893
chr4	3834700	3835749	4.91845
chr16	20097500	20098249	4.91628
chr15	81398800	81401049	4.91509
chr6	120665150	120667549	4.91375
chr5	140418050	140419999	4.91272
chr3	97226700	97227549	4.91229
chr11	88718400	88719049	4.91226
chr2	116060650	116068149	4.90916
chr4	6453450	6454399	4.90711
chr12	69892200	69893149	4.90622
chr6	35177300	35178099	4.90532
chr1	138838150	138842349	4.90531
chr4	135272000	135272799	4.90502
chr1	128359000	128359699	4.90252
chr15	79027650	79029249	4.89955
chr11	69409050	69411299	4.89856
chr5	65696750	65698999	4.89857
chr5	65536500	65538249	4.89841
chr18	3336750	3337699	4.89768
chr5	65390350	65391399	4.89652
chr8	122567950	122569199	4.89456
chr11	102555300	102556199	4.89409
chr7	28169600	28170749	4.89446
chr13	23530350	23530999	4.89282
chr13	100650650	100652199	4.89265
chr14	73237950	73239849	4.89139
chr13	23571400	23574299	4.8904
chr12	54861800	54862899	4.88972
chr3	35932050	35933849	4.88937
chr1	33813850	33814649	4.88909
chr7	126502500	126503649	4.88922
chr17	56040300	56041449	4.88896
chr11	116030250	116031449	4.88844
chrX	18162600	18163999	4.88711
chr19	56547750	56549249	4.88698
chr18	46524150	46525949	4.88791
chr7	127875000	127877499	4.88638
chr10	22730600	22731999	4.88638
chr1	182409100	182409949	4.8843
chr12	101082250	101084349	4.88338
chr14	101653650	101654149	4.88303
chr8	80738250	80739349	4.88132
chr4	58911200	58912849	4.88188
chr7	27195450	27196299	4.88098
chr9	37488600	37490249	4.88107
chr9	65826550	65827749	4.88056
chr7	67950400	67954499	4.88021
chr7	127776500	127778149	4.87881
chrX	77511050	77512299	4.87828
chr4	117155100	117156099	4.87714
chr15	77305850	77307049	4.87569
chr10	63022650	63023999	4.87409
chr4	116463550	116464149	4.87315
chr18	34776950	34777949	4.87026
chr11	22990550	22991849	4.86886
chr10	57486400	57487299	4.86888
chr5	140321050	140322249	4.86948
chr5	131537150	131538749	4.86814
chr13	77134850	77135549	4.86833
chr9	120492350	120493449	4.86721
chr18	6489650	6491399	4.86716
chr17	83215400	83218149	4.86696
chr16	15636500	15638249	4.86691
chr1	182341000	182341649	4.86618
chr4	109475800	109476699	4.86565
chr11	102316350	102319699	4.86592
chr2	74703600	74707149	4.8648
chr3	51276350	51278049	4.86281
chr13	54302800	54303949	4.86351
chr3	60500750	60502049	4.86272
chr2	30066400	30068199	4.86076
chr11	69670800	69672349	4.86081
chr6	87849500	87851549	4.85922
chr3	63976200	63976899	4.85925
chr13	5860400	5861199	4.8588
chr12	112673500	112674249	4.85884
chr17	69383000	69384399	4.85876
chr6	95718350	95718799	4.85759
chr5	135186400	135188699	4.85757
chr2	77945400	77946449	4.85964
chr1	74391500	74392649	4.85702
chr11	87109200	87110899	4.85661
chr2	37422100	37422999	4.85635
chr19	53903350	53904449	4.85602
chr13	63562700	63566299	4.856
chr2	117120250	117122449	4.85367
chr13	66932350	66933549	4.85385
chr3	95818250	95819349	4.85248
chr8	69716200	69716949	4.85231
chr5	29735550	29736849	4.85245
chr2	163644450	163645099	4.84891
chr4	151995200	151996199	4.8472
chr18	58208500	58211399	4.84605
chr8	95806450	95807499	4.84437
chr14	47297800	47300049	4.84409
chr2	168205550	168207449	4.84412
chr12	4917350	4918299	4.844
chr18	7868350	7870349	4.84415
chr15	88751650	88752449	4.84387
chr18	36454100	36454549	4.84393
chr12	20196450	20197599	4.84198
chr3	130708850	130709399	4.84124
chr12	87266400	87267449	4.84109
chr8	85026550	85027699	4.8399
chr6	4902900	4904249	4.83936
chr19	53600050	53601199	4.83895
chr7	34388850	34390499	4.83871
chr10	128231800	128233099	4.83738
chr8	40307600	40308499	4.83741
chrX	36598300	36599149	4.83523
chrX	13280400	13282349	4.83434
chr5	31526500	31527449	4.83438
chr1	57405950	57407249	4.83346
chr6	17693850	17694999	4.83318
chr2	18063800	18065299	4.83325
chr4	126255700	126257299	4.8326
chr2	74711750	74714849	4.8324
chr8	127063350	127065549	4.83288
chr17	34950700	34952999	4.83039
chr7	109155500	109155999	4.82986
chr15	43281850	43282799	4.82923
chr11	88067650	88069449	4.82911
chr5	21054750	21056049	4.829
chr17	33759900	33760399	4.83067
chr19	10203250	10204549	4.82844
chr17	36271150	36271999	4.82836
chr14	21499000	21500399	4.82584
chr8	106892050	106893999	4.82525
chr9	57764450	57766049	4.82533
chr18	35118450	35119699	4.82345
chr7	44553500	44553999	4.82364
chr3	87906150	87907599	4.82279
chr17	17826100	17829749	4.82259
chr10	80432200	80433949	4.82255
chr1	46852450	46854299	4.82165
chr2	160731100	160732649	4.82032
chr12	54719250	54719749	4.81964
chr4	120569450	120570349	4.81949
chr12	11264650	11267099	4.81886
chr8	70776100	70777949	4.81848
chr11	43681950	43682799	4.8182
chr14	120477900	120478849	4.81803
chr8	111299550	111300199	4.81719
chr8	123040950	123042299	4.81584
chr4	134922800	134924699	4.81562
chr18	53862100	53863199	4.81546
chr9	88521900	88522849	4.81591
chr8	84686550	84687949	4.81459
chr16	94369950	94371799	4.81416
chr1	163311050	163314549	4.81392
chr4	116074800	116076749	4.81395
chr3	22076600	22077899	4.81043
chr6	11907000	11907899	4.80839
chr3	30011000	30013349	4.80876
chr5	36695300	36696049	4.8081
chr11	120316250	120317399	4.80802
chr10	97313150	97313849	4.80769
chr7	127511950	127513199	4.80674
chr18	34953450	34955599	4.80647
chr19	45058600	45059549	4.8057
chr2	104493400	104494549	4.80463
chr14	52103300	52104049	4.80447
chr8	72135050	72136749	4.80425
chr9	97110300	97111099	4.80369
chr13	21715050	21718799	4.80261
chr6	136803350	136804499	4.80241
chr5	146832650	146833799	4.80133
chr16	38087450	38088799	4.79985
chr14	57745300	57746349	4.8004
chr5	53590400	53591499	4.79981
chr2	170511100	170511899	4.79911
chr4	128670900	128671549	4.79894
chr1	131525450	131527249	4.79722
chrX	60404200	60404699	4.79954
chr2	91930300	91933049	4.79573
chr2	164910750	164912249	4.79492
chr17	84957950	84958849	4.79502
chr8	84845950	84846849	4.79389
chr5	25499000	25499599	4.79349
chr17	83177950	83179149	4.79368
chr11	115535200	115536299	4.79423
chr17	34031100	34031599	4.79474
chr11	120673000	120673299	4.79269
chr2	93045700	93046599	4.7908
chr15	41788350	41789349	4.79135
chr9	102834750	102835649	4.79042
chr13	107021450	107022349	4.7903
chr5	151650500	151651249	4.79028
chr6	30526200	30527849	4.79017
chr4	134852500	134853849	4.79045
chr9	56160050	56161049	4.79025
chr2	180024950	180025999	4.78999
chr7	25753600	25755249	4.78703
chr16	23107400	23109349	4.78777
chr8	78508050	78510099	4.78729
chr17	28800450	28801599	4.78719
chr11	94210350	94211149	4.787
chr16	87698950	87699949	4.78741
chr19	8941850	8942849	4.78678
chr7	30169000	30170049	4.78658
chr1	131828050	131828699	4.78657
chr17	32320750	32321199	4.78607
chr14	118937950	118938799	4.78594
chr18	32067700	32068449	4.78568
chr4	150237150	150240099	4.78554
chr14	27428800	27429799	4.7847
chr4	136469800	136470949	4.78457
chr1	165642300	165643199	4.78399
chr14	25459150	25459999	4.78398
chr11	69845800	69847199	4.78399
chr18	34220850	34221749	4.78385
chr1	128416650	128417349	4.78379
chr9	109875550	109876899	4.78393
chr3	69722000	69723199	4.7839
chr4	52438550	52439749	4.78367
chr2	57123300	57124399	4.78214
chr5	123344100	123345949	4.78116
chr14	59200600	59202249	4.78128
chr16	96126800	96127799	4.77942
chr7	59228000	59228699	4.77992
chr9	43105200	43106299	4.77785
chr6	4600500	4602199	4.7781
chr14	54894050	54895349	4.77719
chr13	23533850	23535149	4.77685
chr14	100283350	100286949	4.77708
chr2	34371000	34373099	4.7756
chr18	60774300	60775799	4.77538
chr5	33018800	33019799	4.77503
chr3	90293150	90294249	4.77381
chr18	84951650	84952049	4.77333
chr11	101645850	101646399	4.77252
chr11	79339650	79340249	4.77205
chr5	45856450	45857649	4.77059
chr17	35836500	35838449	4.76991
chr6	131292700	131293349	4.76846
chr2	120563350	120563899	4.76739
chr3	152395450	152397249	4.76718
chr8	69790950	69791649	4.76689
chr3	129532550	129534649	4.76605
chr2	72475550	72477399	4.76572
chr7	118115150	118116699	4.7652
chr17	29007250	29008049	4.76534
chr1	182018800	182020949	4.76501
chr16	44173200	44173899	4.76497
chr12	22622750	22623499	4.76484
chr5	119834900	119837749	4.76399
chr7	122066250	122068199	4.76337
chr15	96640850	96643599	4.76337
chr1	192854800	192856199	4.76262
chr9	44305100	44305649	4.76197
chr14	79480350	79481649	4.76197
chr16	37539050	37540399	4.76237
chr10	42501450	42502749	4.76117
chr10	127063550	127064699	4.75993
chr3	98013500	98014249	4.75772
chr12	51828600	51830049	4.7574
chr14	16365100	16366299	4.75716
chr17	87445700	87447249	4.75722
chr6	30047350	30049099	4.75674
chr4	135352100	135353199	4.75521
chr4	123411200	123412549	4.75526
chr13	22035850	22037149	4.75526
chr4	28813300	28814199	4.7552
chr10	79908350	79909099	4.75486
chr12	110446550	110447049	4.75444
chr11	21091250	21092349	4.75422
chr17	28951450	28953099	4.75313
chr16	31663250	31664649	4.75302
chr2	52741950	52742449	4.75308
chr2	35661350	35662149	4.75204
chr1	36938800	36940399	4.75033
chr18	65580150	65583099	4.75014
chr8	47714150	47715049	4.7493
chrX	94122000	94123799	4.74854
chr7	73391150	73392999	4.74856
chr1	44551650	44552599	4.74733
chr9	70502900	70503799	4.74495
chr11	6415800	6416849	4.74419
chr2	18027800	18029149	4.74423
chr5	149183400	149184299	4.74279
chr7	110061700	110062649	4.74282
chr2	112492600	112493349	4.74162
chr10	61782450	61784449	4.74112
chr6	148211300	148212049	4.74031
chr14	56885400	56886399	4.73918
chr18	66023600	66024349	4.73881
chr13	23554450	23556749	4.7384
chr8	31149900	31150249	4.73845
chr10	76032550	76033199	4.7372
chr15	76904200	76905149	4.73694
chr16	64770400	64771399	4.73613
chr13	43479900	43481749	4.73556
chr1	167283850	167285149	4.73549
chr16	14159600	14159949	4.73535
chr9	108783700	108784349	4.7347
chr19	36834200	36835499	4.7346
chr5	24100600	24101149	4.73447
chr6	115807400	115809099	4.73307
chr11	5520950	5521999	4.73342
chr3	138142850	138144849	4.7324
chr10	11343200	11344149	4.73245
chr7	82867250	82869099	4.73135
chr1	162217000	162221499	4.73097
chr5	135933200	135935449	4.7327
chr13	95324600	95326549	4.73008
chr18	9449350	9450099	4.72982
chr7	24884450	24886499	4.72938
chr5	76183900	76184849	4.72841
chr12	75818350	75819049	4.72646
chr7	25248950	25251299	4.72419
chr3	142765150	142765799	4.72378
chr18	38250250	38250649	4.72328
chr11	107130500	107132249	4.72305
chr13	22033950	22035649	4.72128
chr4	86611450	86611999	4.71948
chr15	55556800	55557899	4.72028
chr17	48408200	48409699	4.71861
chr8	88361350	88362299	4.71855
chr19	5637350	5637999	4.71852
chr15	89355700	89356499	4.7178
chr1	177441500	177441899	4.71827
chr3	65957000	65958199	4.71766
chr4	3936850	3938399	4.71743
chr13	35741450	35742199	4.71617
chr6	39556950	39558399	4.71553
chr7	45126500	45128849	4.71491
chr4	14863550	14865399	4.71463
chr4	84884350	84885099	4.71451
chr15	103239600	103240349	4.71375
chr15	96698300	96700099	4.71274
chr17	55878650	55878999	4.71145
chr2	38350900	38353499	4.71042
chr14	78536250	78536899	4.70854
chr2	38643400	38644049	4.7077
chr7	49778350	49778899	4.70746
chr4	33030950	33031949	4.70754
chr13	28949950	28953599	4.70725
chr14	14703000	14704149	4.70763
chr5	107900600	107901499	4.70686
chr4	41135450	41137099	4.70665
chr19	31082950	31083499	4.70627
chr6	117906700	117908699	4.70496
chr8	13159150	13159899	4.7057
chr16	16302450	16303749	4.70538
chr10	93160650	93162049	4.704
chr4	98382750	98383299	4.7044
chr8	11757950	11758299	4.70383
chr4	132260600	132261999	4.70535
chr8	47287750	47289599	4.70246
chr1	167307850	167309399	4.70253
chr4	81442150	81443199	4.70211
chr1	151344500	151345899	4.70232
chr4	21847550	21848599	4.70189
chr2	151541950	151543249	4.70196
chr8	34964500	34965699	4.70099
chr8	46617450	46618049	4.69972
chr10	80149650	80152949	4.69877
chr4	155812500	155813199	4.69834
chr13	53285050	53286049	4.69771
chr2	109917700	109918599	4.69733
chr11	40733700	40734549	4.69674
chr5	32459000	32460449	4.69613
chr9	64019750	64021999	4.69596
chr8	83165550	83166049	4.6964
chr7	3645300	3646199	4.69567
chr2	113848750	113849249	4.69442
chr7	110060750	110061449	4.69365
chr9	72274550	72275849	4.69393
chr4	121214400	121215149	4.69292
chr16	4213350	4214099	4.69585
chr11	104468650	104469399	4.69323
chr10	128322050	128323349	4.69189
chr1	136624900	136625749	4.6899
chr4	88031300	88033299	4.68996
chr5	69556600	69557549	4.68938
chr9	62838750	62839399	4.68921
chr7	143548200	143549899	4.68896
chr9	21367850	21368999	4.68836
chr3	103967700	103969149	4.6892
chr7	116333450	116334199	4.68619
chr5	122158300	122159299	4.68481
chr1	36555850	36558299	4.68474
chr13	17803800	17805399	4.68457
chr11	32455150	32456149	4.68443
chr1	43445750	43446699	4.68417
chr14	70519500	70520499	4.68389
chr13	60175150	60177399	4.68281
chr7	16816150	16817049	4.68217
chr9	108306300	108307149	4.68314
chr7	81344150	81345299	4.68067
chr10	98913650	98915749	4.68029
chr8	4324350	4325449	4.68
chr1	166409400	166409899	4.67987
chr10	39730950	39733199	4.67926
chr15	102406200	102406999	4.67843
chr5	4757000	4758049	4.67815
chr10	80292450	80293449	4.67796
chr7	28808250	28810599	4.678
chr17	71616150	71617249	4.67862
chr2	166995650	166996299	4.6783
chr7	128460500	128461749	4.6778
chr8	75108700	75109349	4.6776
chr16	19760300	19761499	4.67708
chr6	97204800	97205599	4.67769
chr14	122475350	122477249	4.67572
chr6	122339300	122341299	4.67552
chr3	69004450	69006349	4.67503
chr5	38684000	38684849	4.67427
chr14	105897350	105898249	4.67418
chr17	17623900	17625849	4.67424
chr12	3426850	3427749	4.67348
chr9	35421000	35422099	4.6736
chr11	102604400	102607899	4.67375
chr17	71183600	71184249	4.67279
chr6	108828600	108829349	4.67256
chr13	21778300	21780899	4.67253
chr11	114668600	114669899	4.67248
chr11	116023500	116024599	4.67232
chr11	102880400	102881549	4.67206
chr6	83914350	83915299	4.67155
chr11	88047300	88048849	4.67128
chr9	90112950	90114749	4.67052
chr15	96459600	96460949	4.67017
chr11	8623900	8625599	4.6689
chr7	143052700	143053299	4.66836
chr7	28961500	28962199	4.66918
chr16	50430850	50432599	4.66881
chr17	51178600	51179699	4.66795
chr7	44868950	44869749	4.66732
chr17	53479300	53480099	4.66815
chr6	39205350	39206749	4.66687
chr12	54985000	54986399	4.66657
chr13	93498600	93499849	4.66864
chr16	32332250	32333099	4.66647
chr1	24678650	24679299	4.66748
chr11	53350300	53352349	4.66618
chr2	167777450	167777899	4.66532
chr9	103304650	103305999	4.66492
chr9	82973650	82976799	4.66468
chr7	44304350	44304849	4.66354
chr7	114414950	114416549	4.6611
chr5	115011150	115012199	4.66086
chr6	134566100	134567549	4.65997
chr3	51415750	51417049	4.65994
chr2	52857800	52858949	4.65976
chr10	80826650	80827549	4.65894
chr6	52226450	52228249	4.65883
chr16	20672800	20673899	4.65794
chr7	45394700	45395799	4.6571
chr14	105258650	105259349	4.65728
chr12	111574450	111575249	4.65664
chr14	75845200	75846299	4.65646
chr11	50324900	50325649	4.65671
chr12	3309050	3309899	4.65665
chr2	157203800	157205299	4.65601
chr8	66860200	66861249	4.65491
chr6	122297300	122297899	4.65461
chr1	133131250	133132149	4.65499
chr18	21001950	21002649	4.65423
chr3	81036400	81038149	4.65384
chr3	19310300	19312149	4.6545
chr15	98870650	98872399	4.65239
chr16	4593800	4596299	4.65195
chr15	31600850	31602549	4.65163
chr16	52031600	52032649	4.65097
chr12	112828500	112829449	4.64937
chr19	46056550	46057199	4.64842
chr3	133090800	133092349	4.64798
chr1	60180550	60181399	4.64608
chr1	181210750	181211949	4.6458
chr12	24651250	24651799	4.64565
chr17	80205550	80207299	4.64496
chr12	80113400	80116349	4.6445
chr18	73702750	73703849	4.64365
chr2	156311800	156312699	4.64317
chr7	35802150	35802999	4.64313
chr13	111488700	111489949	4.64301
chr17	12318150	12318749	4.64265
chr18	70471750	70472499	4.64278
chr8	3221300	3221849	4.64116
chr17	48410050	48410999	4.64066
chr16	84835000	84836349	4.64061
chr12	32378600	32379949	4.64052
chr10	80053700	80054299	4.64114
chr10	117224200	117224799	4.63954
chr13	44729700	44731249	4.63951
chr14	54925350	54927199	4.63942
chr13	55209950	55213199	4.63872
chr1	30872850	30874199	4.63913
chr11	32347400	32348399	4.63875
chr15	83148550	83149649	4.63837
chr7	45718100	45719299	4.63759
chr3	89214000	89214749	4.63687
chr6	134927200	134928649	4.63666
chr12	51690750	51691949	4.63584
chr14	60250850	60251449	4.63594
chr5	150673750	150674649	4.6348
chr18	6765150	6765699	4.63498
chr17	5840800	5842199	4.63349
chr8	72547250	72548249	4.63317
chr6	134791750	134792649	4.63092
chr13	78197750	78199749	4.6312
chr5	43781400	43782849	4.63072
chr18	24204950	24206599	4.62969
chr10	43478150	43480599	4.62954
chr8	3492550	3493799	4.6278
chr9	20459250	20460099	4.62681
chr7	16924200	16924799	4.62615
chr13	42051250	42051799	4.62638
chr15	99972500	99974149	4.62547
chr10	61680300	61680999	4.62494
chr11	106919900	106920749	4.62374
chr7	89940150	89941149	4.62405
chr19	5803750	5804549	4.62355
chr6	113237850	113238399	4.62272
chr11	106998800	106999449	4.62215
chr2	83644500	83645249	4.62159
chr19	18670850	18671649	4.62271
chr8	57651700	57653749	4.62106
chr11	96977000	96977749	4.61877
chr13	23535350	23536799	4.61796
chr16	33380200	33381749	4.61751
chr9	85748200	85749999	4.61683
chr4	120815150	120815799	4.61752
chr2	18056750	18058499	4.61571
chr9	40799650	40800849	4.61527
chr2	157423900	157425149	4.61462
chr13	92530950	92531449	4.6137
chr5	75152050	75153349	4.61204
chr7	90442250	90444199	4.61187
chr13	115089650	115090299	4.61211
chr10	31608750	31609749	4.61097
chr16	90220200	90221549	4.61033
chr14	26638150	26639349	4.61006
chr9	118040500	118041299	4.60981
chr8	79208850	79209799	4.61097
chr11	61174400	61175049	4.60914
chr13	23544500	23545549	4.60415
chr6	124755750	124757349	4.60391
chr10	79854550	79855549	4.60384
chr11	101657900	101658299	4.60318
chr6	134034950	134036649	4.60321
chr3	158031050	158032149	4.60389
chr17	33684550	33685449	4.60219
chr6	72616350	72616699	4.60209
chr13	48869950	48871599	4.60119
chr2	23039450	23040249	4.59964
chr15	34238150	34238799	4.59841
chr7	114116900	114117749	4.59866
chr7	97579800	97581449	4.59816
chr3	58576650	58577599	4.59794
chr1	191574350	191575599	4.59741
chr1	4857750	4858549	4.5974
chr12	81859850	81861099	4.59645
chr4	126148000	126149749	4.59602
chr19	6046550	6047549	4.59583
chr15	12823900	12825649	4.59595
chr5	13125500	13126299	4.59586
chr17	84185050	84189199	4.59548
chr2	32712000	32713699	4.59466
chr7	101836350	101837199	4.59454
chr6	38875000	38876599	4.5943
chr19	7340800	7341599	4.59386
chr11	93884800	93887299	4.59318
chr17	88440700	88441999	4.5929
chr10	7792400	7793499	4.59256
chr11	106500850	106501949	4.59233
chr8	33731950	33732849	4.59104
chr11	17953200	17953999	4.59034
chr3	51224450	51225449	4.58998
chrX	51204800	51205899	4.58949
chr10	86685250	86685949	4.58903
chr9	72639050	72640299	4.58984
chr3	96263500	96264199	4.58841
chr14	48120850	48121349	4.58877
chr9	108516550	108518199	4.58808
chr11	105180600	105181249	4.58724
chr3	30418700	30420449	4.58682
chr11	85311200	85312049	4.58638
chr14	31131050	31131849	4.58629
chr17	87975050	87975749	4.58593
chr13	96670200	96670949	4.58576
chr3	139074300	139075249	4.58526
chr2	144269500	144270899	4.58478
chr12	108792950	108794899	4.58387
chr9	64172300	64174299	4.58485
chr9	102717300	102719099	4.58289
chr6	100833550	100834399	4.58249
chr11	109472750	109474449	4.58204
chr1	23256250	23256999	4.581
chr4	125085100	125085549	4.58094
chr8	94600950	94601699	4.57951
chr11	84869250	84870149	4.57892
chr5	142818000	142821849	4.57878
chr11	97187300	97187949	4.57829
chr17	65782250	65784149	4.57809
chr11	120230300	120231649	4.57821
chr4	136052350	136053349	4.57774
chr12	73907950	73908899	4.57746
chr7	80114200	80115349	4.5773
chr5	121710900	121713349	4.5774
chr5	104459150	104460299	4.57706
chr1	155082250	155084099	4.57541
chr17	56304250	56305249	4.57453
chr8	92827250	92828199	4.57388
chr7	141228450	141229599	4.57258
chr16	37776700	37777649	4.57244
chr2	181287000	181288049	4.57301
chr9	65676550	65676999	4.56956
chr4	126201800	126202749	4.56951
chr2	128966700	128968449	4.56828
chr19	40894350	40895549	4.56707
chr6	13871100	13871499	4.56723
chr5	32610500	32612099	4.56667
chr9	63756950	63759199	4.56712
chr10	128058250	128060099	4.56637
chr2	163602150	163602849	4.56657
chr10	80385750	80387599	4.56618
chr2	73528900	73530049	4.56523
chr9	46012800	46013549	4.56596
chr6	52239450	52240499	4.56501
chr10	30600150	30601149	4.56735
chr5	134183550	134184499	4.56372
chr1	131096850	131097949	4.56326
chr17	35134850	35136199	4.56287
chr15	103240450	103241749	4.56196
chr8	110845950	110847449	4.56117
chr4	63544800	63545599	4.56184
chr11	55469650	55470549	4.56023
chr11	86356800	86358349	4.56052
chr14	26579450	26580199	4.55991
chr4	103113600	103115249	4.55997
chr15	12321450	12322499	4.55997
chr11	115420100	115420899	4.55994
chr1	59684950	59685999	4.55931
chr2	180701200	180702149	4.56095
chr5	5693800	5694249	4.55886
chr10	83543350	83544499	4.55886
chr14	34673800	34674849	4.55796
chr12	16810950	16811399	4.55793
chr12	27338500	27342699	4.55813
chr6	120363600	120365399	4.55719
chr17	25183900	25184499	4.55814
chrX	68678600	68679549	4.55522
chr3	94837350	94838499	4.55554
chr10	81377900	81378449	4.55472
chr13	24800850	24802399	4.55396
chr3	84039400	84040499	4.55377
chr9	107553950	107554499	4.55358
chr11	35769550	35770449	4.55254
chr8	84969300	84970499	4.55223
chr5	129500550	129502299	4.55223
chr11	3201600	3203399	4.55135
chr16	11253150	11254299	4.55069
chr14	62761450	62762449	4.55071
chr11	69417800	69418849	4.54953
chr17	45571600	45574599	4.54908
chr18	80150700	80151799	4.54902
chr15	100038650	100039649	4.54872
chr5	115435150	115437749	4.5482
chr12	99392100	99393049	4.54805
chr10	8885200	8886899	4.54671
chr10	111009200	111010849	4.54586
chr10	58446000	58447699	4.54623
chr8	73352700	73353449	4.54499
chr19	12794550	12795599	4.54468
chr4	24496000	24497049	4.5437
chr4	143212200	143213099	4.54383
chr16	87354150	87354549	4.54365
chr9	124423000	124425049	4.54288
chr2	179976850	179977649	4.54218
chr4	132048350	132049149	4.54148
chr5	114379500	114381299	4.54195
chr14	116925300	116927749	4.54149
chr16	46495900	46497649	4.54106
chr12	40222450	40223199	4.54055
chr4	137387700	137388899	4.54021
chr5	34949400	34950149	4.54088
chr9	114561750	114564949	4.53992
chr12	69371200	69373049	4.53899
chr14	51984500	51986449	4.53775
chr2	34802350	34803049	4.53778
chr16	55966450	55967099	4.53754
chr5	115489150	115489549	4.53671
chr10	62791350	62793099	4.53643
chr5	149319650	149320749	4.5346
chr10	128909450	128910749	4.53388
chr11	32266800	32267699	4.53449
chr13	14063700	14065049	4.53372
chr14	121035550	121037549	4.53259
chr7	44245900	44247499	4.53225
chr2	106693050	106695399	4.5313
chr14	27069650	27070799	4.53103
chr9	22071000	22071449	4.53097
chr17	70852300	70853399	4.53004
chr2	60962000	60963249	4.52963
chr15	50888550	50890149	4.52966
chr11	69920000	69921399	4.52818
chr7	25658250	25659049	4.52939
chr5	113735750	113736199	4.52812
chr2	18046200	18048699	4.52652
chr6	121109700	121110549	4.52609
chr4	126967300	126968199	4.52603
chr1	171345650	171346299	4.52659
chr18	61555300	61557249	4.52594
chr12	8640700	8641399	4.52504
chr14	54577050	54578249	4.52484
chr14	62332000	62332749	4.52465
chr3	144203950	144206499	4.52453
chr19	45782500	45783649	4.52444
chr2	168765600	168767099	4.52413
chr1	172026400	172027699	4.52594
chr17	35089150	35089749	4.52315
chr18	46740900	46742299	4.52273
chr5	137785650	137786649	4.52194
chr3	90508700	90509499	4.52169
chr13	22039400	22042999	4.52099
chr14	76504100	76506849	4.52075
chr2	166152350	166155749	4.52121
chr7	109518350	109520199	4.52035
chr11	79253700	79254749	4.52052
chr1	166002950	166003749	4.5198
chr9	56994800	56996199	4.51942
chr3	32708550	32709549	4.52021
chr18	60747700	60748999	4.51945
chr2	34753750	34754999	4.5199
chr2	139678100	139678649	4.51826
chr6	125163850	125165799	4.51813
chr5	34335650	34336299	4.51743
chr17	56585000	56586099	4.51722
chr1	180640400	180642049	4.51805
chr7	142481350	142482499	4.51648
chr3	30103850	30108449	4.51622
chr14	61647350	61649149	4.51637
chr9	32540100	32543499	4.51549
chr6	143166900	143167799	4.51497
chr9	66591750	66593049	4.51495
chr12	9029750	9031049	4.51448
chr5	72914450	72915649	4.51292
chr5	33819900	33821549	4.5124
chr2	169632650	169634249	4.51173
chr5	96209400	96209999	4.51024
chr15	96284550	96289349	4.50981
chr13	111686300	111687749	4.50959
chr11	69632900	69633649	4.51023
chr15	38518350	38519149	4.50929
chr4	131872750	131873449	4.50901
chr3	144570500	144571399	4.5094
chr3	131110150	131112549	4.50893
chr10	80167750	80168499	4.5083
chr8	35494750	35495549	4.50671
chr9	120571550	120572299	4.50641
chr11	20201400	20202199	4.50672
chr4	54944950	54949849	4.50573
chr10	81569700	81570999	4.50534
chr6	29348150	29348699	4.50526
chr1	181150900	181151449	4.50521
chr3	130060050	130061449	4.50448
chr11	69661900	69662649	4.50379
chr7	34132350	34133799	4.50389
chr8	20550200	20550849	4.50342
chr2	60209850	60210749	4.50339
chr13	93303800	93304799	4.50376
chr2	60880500	60881949	4.50192
chr14	67071300	67072449	4.50242
chr15	36282450	36283099	4.50132
chr6	120836100	120836699	4.50084
chr9	69989450	69990349	4.49891
chr4	26345850	26346899	4.49819
chr17	44777150	44777699	4.49802
chr17	63498900	63500649	4.49776
chr4	118290250	118291399	4.49705
chr11	105291950	105293699	4.49726
chr18	10617750	10618449	4.49648
chr9	65141150	65142549	4.49649
chr11	112977250	112977649	4.49629
chr10	40883500	40884799	4.49569
chr9	70421000	70421599	4.49579
chr11	95309800	95310249	4.49495
chr5	129886300	129887399	4.49468
chr10	28074050	28075649	4.49404
chr3	30506700	30510449	4.49383
chr5	149184600	149185699	4.49239
chr11	116853250	116854049	4.49178
chr6	140423550	140424999	4.49067
chr7	100120750	100121949	4.4904
chr7	109671350	109672549	4.49032
chr2	157462850	157464149	4.4909
chr7	5080150	5080999	4.49151
chr4	103119300	103120199	4.49035
chr5	67260650	67261399	4.48935
chr8	110618550	110618949	4.48891
chr11	51263100	51263949	4.48847
chr14	27068050	27069299	4.48747
chr1	168428700	168432149	4.48672
chr8	79398150	79399549	4.4871
chr13	118386650	118387249	4.48648
chr13	58214900	58216249	4.48512
chr14	18331150	18332149	4.48491
chr11	75486750	75487349	4.4857
chr11	69681350	69681899	4.48429
chr12	112949850	112950549	4.48304
chr11	51999600	52000799	4.4826
chr17	74294100	74295899	4.48119
chr1	181841550	181842499	4.48129
chr13	30544800	30545249	4.48075
chr16	90283350	90284449	4.48088
chr2	32966350	32967349	4.48058
chr16	23988550	23988999	4.48116
chr11	102297350	102297749	4.48206
chr2	131261650	131262299	4.4804
chrX	152233000	152233949	4.48028
chr11	53299150	53301399	4.48003
chr2	23068300	23068899	4.48065
chr11	6546400	6547599	4.48166
chr8	120488550	120489599	4.48294
chr9	54863650	54864599	4.47962
chr11	60878100	60878799	4.47952
chr3	33799500	33800749	4.47943
chr8	75109500	75110349	4.47939
chr11	103697050	103698349	4.47962
chr4	108458900	108460749	4.47761
chr6	125009050	125009849	4.47657
chr10	99261100	99262999	4.47693
chr9	106821900	106822549	4.47581
chr8	48553400	48556199	4.4753
chr8	19784600	19785399	4.47517
chr15	79545500	79546649	4.47422
chr8	89041800	89043499	4.47404
chr4	132535500	132536099	4.47406
chr17	32283600	32284799	4.47376
chr5	86065050	86065549	4.47316
chr12	53252650	53253699	4.47236
chr18	76944050	76944499	4.47185
chr6	49218250	49219149	4.47048
chr8	3676450	3677199	4.4694
chr19	7482400	7483249	4.4693
chr12	35047200	35047849	4.46886
chr15	82046550	82047649	4.46914
chr2	52424200	52425499	4.46899
chr1	191717600	191719099	4.4685
chr11	19013700	19020499	4.46858
chr16	36070950	36072699	4.46745
chr17	56673350	56674049	4.46638
chr13	23531150	23533699	4.46613
chr13	21749450	21751349	4.46666
chr11	87470950	87471449	4.46604
chr7	55793450	55794699	4.46628
chr5	100428900	100429499	4.46601
chr10	115250850	115251449	4.46565
chr5	138187450	138188249	4.46637
chr5	115300000	115300999	4.4656
chr3	96244450	96245399	4.46522
chr4	124850200	124851499	4.46522
chr9	44482750	44483449	4.46444
chr19	34922300	34922849	4.46448
chr2	126875550	126876699	4.46431
chr7	127614300	127615949	4.46406
chr5	90931050	90932299	4.4634
chr10	20311500	20313449	4.46385
chr14	50061350	50061799	4.46332
chr12	98258500	98259649	4.46168
chr18	35598600	35599149	4.46123
chr19	45017450	45019199	4.46118
chr11	29172850	29173799	4.46082
chr3	88530750	88533749	4.45916
chr9	50856900	50857499	4.459
chr7	25076250	25076949	4.45891
chr1	9942450	9944149	4.45901
chr2	30834850	30836549	4.45859
chrX	105928600	105929349	4.45787
chr6	114920100	114922049	4.45826
chr1	177257450	177259049	4.45651
chr6	147475750	147476299	4.45687
chr7	25072400	25073099	4.45599
chr7	63937750	63938899	4.45577
chr11	77606850	77607849	4.45468
chr3	5575500	5576199	4.45472
chr2	134643650	134644149	4.45346
chr17	83350950	83352249	4.45442
chr4	150008650	150009099	4.45312
chr11	119299050	119300099	4.45206
chr12	8771400	8773649	4.45233
chr5	20950550	20951899	4.45162
chr7	80025200	80027699	4.44971
chr4	123139400	123139999	4.45058
chr8	121950150	121951799	4.44897
chr11	5541450	5542249	4.44964
chr8	25602200	25602949	4.44836
chr16	38452250	38453199	4.44748
chr8	85554550	85555749	4.44671
chr6	142756650	142757249	4.44677
chr16	17796900	17798449	4.44608
chr8	84066800	84067349	4.44607
chr1	80339600	80340799	4.44525
chr9	57076450	57077099	4.44528
chr9	64022200	64022899	4.44491
chr11	116489950	116490499	4.44456
chr6	113306750	113308099	4.44459
chr9	24502450	24503199	4.44502
chr10	120978450	120979699	4.44311
chr8	85299500	85300449	4.44317
chr3	129531750	129532249	4.44294
chr14	45529200	45531199	4.44242
chr4	88721550	88722499	4.44238
chr17	23802900	23804399	4.44239
chr7	5060550	5063399	4.44228
chr6	21851750	21852349	4.44228
chr5	138441500	138442349	4.44211
chr9	78520050	78521899	4.44301
chr16	30069650	30071249	4.43882
chr2	125247600	125248349	4.43855
chr3	41741900	41742549	4.43827
chr16	31274400	31275249	4.43835
chr2	91710200	91711349	4.43752
chr10	85957250	85957799	4.43957
chr13	23542450	23544299	4.4367
chr12	78748900	78749749	4.43646
chr11	82764000	82764849	4.43718
chr17	34981500	34982499	4.43613
chr1	179959500	179960549	4.43573
chr19	45659400	45660499	4.43581
chr2	127587150	127587849	4.43443
chr6	51592050	51592949	4.43417
chr1	87755900	87756749	4.43691
chr1	87213400	87214749	4.4344
chr2	74696700	74700349	4.43431
chr5	64803300	64804599	4.43379
chr3	95994700	95996649	4.43351
chr7	19003750	19004549	4.43223
chr14	122982600	122983849	4.43203
chr10	41518750	41520499	4.43153
chr6	88044550	88045249	4.43126
chr17	21567000	21567549	4.43056
chr15	57694800	57695999	4.4306
chr11	23497450	23498049	4.43017
chrX	169319650	169320449	4.42976
chr13	23760050	23761299	4.42979
chr2	109890450	109891849	4.42971
chr13	55486850	55488199	4.42968
chr3	101397700	101398399	4.42977
chr10	45066800	45067949	4.42965
chr15	79687250	79687899	4.42878
chr2	75702950	75704549	4.42846
chr3	5218200	5220199	4.42802
chr11	49846850	49847399	4.42762
chr5	33274700	33274999	4.42754
chr11	88717350	88718249	4.42734
chr14	49065550	49066699	4.4275
chr14	20733950	20734699	4.42671
chr6	52231950	52234999	4.42868
chr3	96414150	96414849	4.42631
chr18	77064750	77066099	4.42612
chr7	25219000	25219799	4.42606
chr11	98942300	98942999	4.42542
chr13	54693300	54693899	4.42508
chr2	26932650	26933399	4.42506
chr8	4677950	4678599	4.42479
chr10	56377400	56379599	4.42465
chr11	84129250	84129599	4.42468
chr18	15150250	15151599	4.42412
chr4	33248700	33249299	4.42385
chr7	138845900	138847349	4.42712
chr1	82839450	82840399	4.42331
chr10	89745050	89745799	4.42339
chrX	133897800	133898249	4.42302
chr5	125389000	125390299	4.42291
chr13	92355250	92355699	4.42217
chr4	128804850	128806949	4.42176
chr18	12861900	12863249	4.42211
chr13	15462350	15466199	4.42162
chr6	119478550	119480399	4.42121
chr10	91187600	91188399	4.42115
chr16	21204700	21205699	4.42128
chr2	27474600	27475699	4.42148
chr17	74528500	74529449	4.42
chr4	132421650	132422499	4.41959
chr7	45129000	45129649	4.41923
chr6	40471400	40472099	4.41892
chrX	12006050	12006999	4.41951
chr16	77329150	77331249	4.41872
chr14	31001400	31001899	4.41855
chr4	70535050	70535549	4.41827
chr17	28691450	28692699	4.41838
chr19	18713200	18713899	4.41756
chr15	89373450	89374049	4.41776
chr11	98794500	98796699	4.4173
chr1	91250300	91251049	4.41756
chr4	8910900	8911899	4.41655
chr5	114774600	114775249	4.41669
chr12	33957650	33959649	4.41521
chr14	50924450	50925949	4.41485
chr7	45015450	45016099	4.4151
chr13	21782250	21784749	4.41419
chr2	125858300	125859049	4.41412
chr2	165387700	165388349	4.414
chr14	65358450	65359349	4.41442
chr19	24476800	24478099	4.41294
chr17	70849900	70851999	4.41301
chr2	128686800	128687649	4.41236
chr6	52223750	52226199	4.41252
chr10	95515100	95516049	4.41227
chr3	144201950	144202349	4.41141
chr4	116625950	116627499	4.41112
chr6	83121750	83122499	4.41076
chr6	18848600	18849199	4.4102
chr4	47353250	47354049	4.40958
chr6	35353500	35354699	4.40848
chr1	72243900	72244349	4.40881
chr14	56886600	56887999	4.40821
chr11	98192700	98193299	4.40816
chr3	145118100	145119349	4.40773
chr2	167015300	167015849	4.4081
chr4	89136950	89138299	4.40775
chr8	85024600	85025849	4.40677
chr9	31030400	31031199	4.40705
chr6	56796450	56798249	4.40693
chr4	133966750	133968799	4.40644
chr11	43528450	43529499	4.40636
chr6	117917000	117918399	4.4061
chr18	34860300	34860949	4.40594
chr11	19924400	19926299	4.4059
chr7	79391650	79392799	4.40593
chr12	23800150	23800849	4.4062
chr2	156110900	156111999	4.40568
chr11	20248800	20250149	4.40412
chr2	92182500	92185749	4.40376
chr1	86440850	86443449	4.40346
chr1	137898600	137900299	4.40174
chr16	8737700	8739099	4.40108
chr7	34167900	34168599	4.40059
chr1	91398250	91398799	4.40021
chr17	12991500	12993049	4.40053
chr3	129830600	129831499	4.40042
chr6	30401850	30402799	4.39849
chr9	120933300	120934999	4.39816
chr3	51340100	51341299	4.39799
chr2	135658300	135659849	4.39767
chr1	156035250	156036049	4.39698
chr6	87980200	87982049	4.3959
chr2	75658100	75658949	4.39538
chr13	21179850	21181299	4.39431
chr1	175692050	175692849	4.39436
chr7	142552750	142554849	4.39401
chr15	37135550	37136099	4.39415
chr11	120184600	120189949	4.39251
chr2	91526700	91527449	4.39164
chr2	48813550	48814699	4.39152
chr3	103020000	103021699	4.39107
chr18	9957900	9958799	4.39225
chr11	120548950	120550149	4.3919
chr7	4690550	4691149	4.39055
chr3	108910700	108912499	4.38994
chr12	52603100	52603799	4.38888
chr12	13248650	13249449	4.38794
chr2	34406800	34407249	4.38795
chr7	80402000	80402649	4.38746
chr11	17257550	17258249	4.38793
chr10	80226650	80227499	4.38647
chr11	59948200	59948649	4.38549
chr12	73111600	73113349	4.38529
chr8	109705550	109706349	4.38526
chr13	23698650	23699049	4.3855
chr11	33161800	33163099	4.38496
chr10	79852950	79854149	4.38444
chr17	35916900	35919549	4.38386
chr14	54686200	54686649	4.38297
chr7	110122000	110123349	4.38301
chr15	25411600	25414699	4.38347
chr8	107293550	107294549	4.38255
chr10	93888850	93889799	4.38283
chr4	108779900	108781049	4.38297
chr12	46818550	46819249	4.38189
chr10	117709900	117711299	4.38125
chr12	83632250	83633399	4.38122
chr7	135715400	135716499	4.38114
chr1	59669800	59671449	4.38083
chr3	97297100	97297899	4.38033
chr4	11965950	11966499	4.37928
chr7	99482650	99483649	4.37904
chr4	111415000	111415449	4.37992
chr9	107981200	107983449	4.37944
chr6	52216850	52218799	4.37867
chr17	62880400	62883149	4.37836
chr19	8871550	8872249	4.37944
chr4	98923600	98924799	4.37811
chr2	26639550	26640299	4.37784
chr5	112342700	112343549	4.37784
chr4	148130800	148131599	4.37726
chr11	108920300	108923049	4.3774
chr16	85172250	85173649	4.37673
chr13	21362850	21363249	4.37648
chr5	115327200	115328399	4.37581
chr11	73047900	73048449	4.37544
chr6	71543850	71544649	4.37396
chr15	89195550	89196499	4.37382
chr5	52783000	52783599	4.37479
chr8	122567300	122567849	4.37286
chr14	66868800	66869199	4.37286
chr5	8056250	8056899	4.37345
chr4	122886250	122886849	4.37243
chr11	62456650	62458699	4.3726
chr2	144010050	144011249	4.372
chr17	35979600	35980549	4.37147
chr9	44334700	44336249	4.37096
chr10	79874050	79874849	4.37071
chr16	56716650	56717449	4.36947
chr8	84979650	84980049	4.36893
chr7	130546300	130547399	4.3696
chr15	28024200	28025899	4.37009
chr17	15825700	15826549	4.3682
chr12	24708250	24709949	4.36828
chr3	100685050	100686299	4.36796
chr1	152901750	152903199	4.36753
chr9	57521200	57522049	4.36699
chr16	58408450	58409099	4.36572
chr17	34604200	34605749	4.36547
chr13	70637300	70638149	4.36462
chr16	94526500	94527699	4.36499
chr6	8209200	8209949	4.36434
chr12	78225850	78226749	4.36496
chr12	113098400	113099149	4.36414
chr19	41482150	41483949	4.36316
chr2	71389250	71389749	4.36317
chr10	121475000	121476399	4.36231
chr12	17881850	17882799	4.36133
chr9	100642400	100643299	4.36119
chr17	50508850	50510099	4.36125
chr15	102202850	102204249	4.36171
chr7	28597350	28598199	4.36056
chr9	122865400	122866049	4.35876
chr12	25097550	25101249	4.35777
chr9	70678900	70680099	4.35664
chr17	47009600	47010549	4.35662
chr12	33966500	33967349	4.35555
chr7	141060850	141061649	4.35503
chr11	115564150	115565049	4.35497
chr8	25840250	25840799	4.35467
chr2	158027850	158029549	4.35495
chr9	65032400	65033149	4.35419
chr3	58414700	58416099	4.35384
chr14	40966250	40966799	4.35904
chr16	24392800	24394199	4.35317
chr1	86064350	86065249	4.35339
chr14	20348200	20348899	4.35324
chr12	8921500	8922849	4.3523
chr3	55112000	55113099	4.35224
chr1	39900250	39902199	4.35206
chr5	120612300	120613299	4.35239
chr10	53629150	53629999	4.35236
chr13	64274500	64274949	4.35094
chr16	91454350	91455199	4.35432
chr18	6135200	6135949	4.34978
chr1	189007150	189007849	4.34985
chr5	3927800	3928899	4.35025
chr18	76241300	76242549	4.34935
chr11	61484050	61485149	4.34926
chr4	138216600	138216999	4.34764
chr9	59035700	59037599	4.34737
chr11	59838950	59839799	4.34711
chr16	18247550	18248749	4.34739
chr6	119847600	119848599	4.34706
chr6	128362000	128363549	4.34646
chr2	90917150	90918199	4.34572
chr1	78488850	78489199	4.34564
chr7	109959800	109960449	4.34448
chr1	86433600	86435299	4.34375
chr19	29047300	29047699	4.34353
chr1	45794950	45796099	4.34306
chr19	36925500	36926799	4.34274
chr3	95928450	95928949	4.34272
chr19	6058000	6058649	4.34304
chr8	40510850	40512449	4.34113
chr2	164769850	164770699	4.3417
chr17	33954850	33955699	4.34087
chr9	72925100	72925949	4.34117
chr2	14073300	14074999	4.34103
chr2	170547050	170547599	4.33964
chr7	44496100	44496499	4.33953
chr17	46555200	46556249	4.339
chr19	37207450	37208399	4.33896
chr17	15705000	15706249	4.339
chr1	178528100	178529299	4.33829
chr13	23684200	23686049	4.33842
chr10	43577800	43581299	4.33743
chr7	118242800	118243649	4.33734
chr18	76161000	76161549	4.33556
chr2	34249400	34250249	4.33516
chr1	131910500	131911599	4.33517
chr17	28328550	28329599	4.33454
chr2	85048050	85048449	4.3359
chr4	48540000	48541199	4.33416
chr9	20520600	20522149	4.33378
chr11	115707900	115708599	4.3337
chr13	90760100	90760599	4.33375
chr1	39367850	39369049	4.33447
chr4	149737500	149737999	4.3334
chr12	21372950	21373599	4.33279
chr3	123508600	123509099	4.33261
chr8	105860600	105861549	4.33221
chr6	17637100	17637799	4.332
chr18	32559300	32560099	4.33199
chr3	90052900	90053749	4.33159
chr3	66985650	66986449	4.33126
chr13	23756850	23757799	4.33126
chr12	85110450	85111299	4.3319
chr9	72806550	72808099	4.33096
chr17	79020050	79020949	4.33026
chr7	27591600	27592649	4.3303
chrX	136067650	136068199	4.33
chr8	107095850	107096599	4.32962
chr14	76032700	76033099	4.32962
chr9	9238300	9239349	4.32869
chr2	53191400	53192949	4.32897
chr4	133574150	133575199	4.32914
chr5	110107800	110108299	4.32913
chr2	147012250	147014349	4.3273
chr3	79286450	79287299	4.32908
chr4	129742550	129743499	4.32667
chr8	79639350	79640199	4.32645
chr13	9276450	9277449	4.32616
chr1	54438300	54439249	4.3258
chr11	58008850	58009999	4.3258
chr15	11994850	11996049	4.32565
chr19	5388150	5388649	4.32552
chr18	73571700	73572349	4.3255
chr5	123748350	123749399	4.32319
chr8	86884700	86885249	4.32352
chr19	41912000	41912699	4.3228
chr1	152624300	152625399	4.32281
chr19	28010100	28012599	4.32203
chr10	69212550	69213699	4.32301
chr8	70896300	70897499	4.32192
chr5	44226200	44227549	4.32205
chr4	76449300	76450699	4.32211
chr16	4885550	4886099	4.321
chr12	69986350	69987599	4.32072
chr3	108721150	108722199	4.32027
chr8	33929100	33929849	4.32036
chr16	96081550	96082599	4.31983
chr1	59762550	59764599	4.31958
chrY	2663350	2663699	4.33122
chr7	130519150	130520249	4.31873
chr15	10485100	10485949	4.31874
chr2	132577400	132578199	4.31768
chr10	67548150	67549799	4.3176
chr3	135690550	135691949	4.31711
chr1	74505350	74507399	4.31629
chr18	35918900	35920449	4.3159
chr16	32277450	32278099	4.31593
chr9	78113250	78113899	4.31524
chr7	127232150	127233899	4.31512
chr3	95903750	95904999	4.31552
chr8	119910800	119911699	4.31422
chr11	68692100	68693499	4.31429
chr5	100673800	100674249	4.31411
chr7	142659900	142662199	4.31397
chrX	94541200	94541999	4.315
chr5	132541500	132542249	4.31247
chr5	115157550	115159349	4.31248
chr3	69126100	69127099	4.31224
chr3	146499250	146500699	4.31161
chr16	4718500	4719649	4.31124
chr5	137307000	137308099	4.31084
chr15	8443500	8445799	4.31048
chr2	69722800	69723449	4.31166
chr8	69822600	69823149	4.30993
chr15	89429500	89430199	4.30971
chr3	65391750	65392599	4.30948
chr6	140623550	140624949	4.3092
chr1	191575700	191576099	4.30884
chr1	127774200	127775099	4.3087
chr15	49874150	49874599	4.30857
chr1	64532150	64532749	4.30858
chr13	24831650	24832699	4.30835
chr17	29490700	29491399	4.30797
chr7	111122000	111123349	4.30784
chr7	108934350	108935099	4.30697
chr7	75455600	75456349	4.3067
chrX	136741700	136742699	4.30695
chr13	23574450	23574999	4.30644
chr2	122348650	122349549	4.30677
chr13	104228200	104229399	4.30597
chr19	57361050	57361849	4.30542
chr11	74830500	74832049	4.3056
chr5	88554450	88555149	4.30502
chr2	32150550	32151949	4.3035
chr10	116949700	116950449	4.3035
chr8	104442100	104443099	4.30326
chr5	135393800	135394699	4.30294
chr8	83593650	83594449	4.30252
chr2	130274350	130275399	4.30237
chr18	56706750	56707499	4.30234
chr5	121204550	121205549	4.30072
chr7	66109250	66110499	4.30066
chr5	119803400	119805999	4.30025
chr17	83705950	83706849	4.30017
chr7	133708750	133709799	4.30057
chr13	24760900	24762049	4.29953
chr5	145231850	145232299	4.29929
chr10	80115800	80117099	4.29901
chr10	78573950	78575149	4.29912
chr17	56934750	56935549	4.29896
chr14	33446200	33447199	4.29892
chr4	138217150	138217899	4.29936
chr19	53944750	53945649	4.29887
chr12	17992850	17993599	4.29936
chr4	137356750	137357699	4.29858
chr19	29251050	29252249	4.29858
chr14	56777500	56778299	4.29851
chr6	143261150	143261849	4.29824
chr13	45001400	45002199	4.2982
chr8	79295000	79295699	4.29772
chr14	27508150	27508449	4.29736
chr7	110018300	110019199	4.29745
chr16	42875850	42876949	4.29751
chr8	102783650	102785449	4.29716
chr11	54786900	54787649	4.29625
chr15	36609150	36609949	4.2966
chr1	171287450	171288049	4.29513
chr9	58554500	58555549	4.29513
chr4	99120150	99121099	4.29483
chr16	28928800	28930199	4.29792
chr9	57644850	57645699	4.29414
chr1	60408900	60409499	4.29352
chr13	93191500	93192449	4.29292
chr11	77686200	77687949	4.29243
chr7	141475100	141475499	4.29247
chr1	161035100	161037349	4.29365
chr3	95015750	95016249	4.29136
chr1	171294150	171295149	4.29116
chr3	30792650	30794249	4.29103
chr14	20641050	20641699	4.29239
chr6	86365700	86366299	4.29053
chr7	59228750	59229799	4.29041
chr2	121955500	121957099	4.29018
chr12	72761200	72762099	4.28954
chr10	12868600	12869799	4.2889
chr11	96006000	96008499	4.28876
chr7	27487050	27487799	4.28915
chr12	110601400	110602249	4.2888
chr7	62463350	62464549	4.28833
chr11	109362700	109363799	4.28752
chr4	57846650	57847499	4.28695
chr18	5591900	5593249	4.28677
chr6	52713750	52714349	4.28657
chr1	163314650	163315649	4.28723
chr6	38433900	38434999	4.2863
chr17	84790150	84790949	4.28585
chr3	9250600	9251749	4.28536
chr8	33385550	33386599	4.28515
chr12	29937950	29939349	4.28478
chr3	90079700	90080249	4.28453
chr13	23738050	23741399	4.28485
chr11	52231600	52232649	4.28379
chr9	14276350	14277149	4.28358
chr14	67715100	67715699	4.28355
chr3	89337350	89338149	4.28576
chr1	66817050	66817649	4.2825
[truncated: 13,266 more rows]

## Sheet: ShhGli3_peaks
Chromosome	Start	End	log2FC_input
chr12	110695000	110696449	7.35687
chr3	51224100	51225649	7.19946
chr17	71001400	71003349	7.14819
chr11	23255750	23257999	7.10724
chr4	86856050	86857949	7.02233
chr18	60774200	60775899	6.95608
chr2	117119900	117123049	6.82738
chr11	75732800	75734249	6.80212
chr8	123040850	123042349	6.79286
chr3	152395200	152397449	6.73806
chr9	44603600	44606099	6.70881
chr7	111081550	111083099	6.69804
chr1	180640300	180642149	6.64387
chr4	34550500	34551949	6.6104
chr9	31279500	31282099	6.59617
chr4	40721550	40723749	6.59559
chr11	115535050	115536349	6.5933
chr17	27554300	27558599	6.58224
chr19	60789450	60791499	6.58195
chr17	46856000	46858949	6.57517
chr2	164910600	164912199	6.56281
chr3	133090400	133092549	6.55906
chr11	43681900	43682849	6.5588
chr14	34501000	34503449	6.55063
chr6	71908200	71909799	6.53023
chr11	120989900	120991899	6.51473
chr15	100227050	100228849	6.51292
chr6	47593700	47596099	6.51204
chr8	78508050	78509949	6.49951
chr7	16400000	16403449	6.49564
chr7	44868750	44870349	6.48794
chr19	55741650	55744999	6.48715
chr10	43477850	43480649	6.48553
chr2	72978400	72981399	6.47443
chr9	72661350	72664299	6.47147
chr9	18292150	18293499	6.46377
chr17	45571900	45574599	6.4613
chr6	51467250	51472149	6.45314
chr19	10524650	10526199	6.4508
chr18	22343150	22345199	6.44727
chr14	76504150	76506899	6.4409
chr6	67266900	67268399	6.43297
chr6	134566050	134567599	6.4269
chr5	134638300	134639449	6.42087
chr12	31948450	31950299	6.41863
chr19	45782250	45783699	6.41192
chr2	119476950	119478049	6.40665
chr13	48545050	48546649	6.40636
chr1	86524600	86529599	6.4052
chr3	157533950	157535149	6.40447
chr10	117375650	117377599	6.4019
chr19	16132150	16133799	6.40005
chr13	58400500	58403599	6.39739
chr18	15149500	15152049	6.39338
chr2	60124000	60126199	6.38463
chr5	121545000	121546649	6.37412
chr12	27337950	27342699	6.37289
chr10	128231600	128232849	6.37069
chr13	46726250	46728649	6.3701
chr5	105876450	105877599	6.36763
chr4	34881900	34883549	6.36756
chr13	9763500	9765549	6.36173
chr2	52741800	52742749	6.35879
chr19	3767300	3769449	6.35095
chr10	91169650	91172449	6.35055
chr3	34019400	34021349	6.33799
chr5	145139200	145141099	6.32514
chr4	129740950	129743599	6.3231
chr5	24841000	24842749	6.31065
chr4	133751750	133755749	6.30197
chr13	55692750	55694149	6.29999
chr11	17952950	17953999	6.29801
chr1	125434250	125435699	6.29499
chr4	33247000	33248599	6.29049
chr5	52189450	52190649	6.28427
chr13	58126450	58129799	6.27878
chr3	122618600	122620249	6.27675
chr13	15462150	15467249	6.27656
chr3	90051150	90052599	6.27366
chr3	119781350	119783999	6.2734
chr7	128739400	128740599	6.26794
chr6	38433850	38435199	6.26168
chr12	3426800	3427849	6.25918
chr16	23107250	23109399	6.25893
chr8	74993500	74994599	6.25654
chr7	34167450	34168649	6.25418
chr11	70653100	70656749	6.25303
chr19	5800400	5804549	6.24882
chr13	103919000	103922099	6.24674
chr2	170511000	170511999	6.24636
chr19	8723400	8724599	6.24632
chr7	90129200	90131549	6.24518
chr4	129513600	129514899	6.24234
chr8	105635650	105637999	6.23966
chr7	45813100	45814399	6.23417
chr9	13748750	13749899	6.23257
chr5	90930950	90932249	6.22025
chr16	84834100	84836299	6.21888
chr19	57609900	57611549	6.21236
chr5	122500850	122502299	6.20472
chr8	127063350	127065549	6.2023
chr2	130178250	130179649	6.20097
chr3	158030750	158032299	6.19369
chr10	122984050	122986999	6.19129
chr6	119478800	119480449	6.18876
chr3	148986600	148991349	6.18629
chr6	39556900	39558349	6.18495
chr5	142904900	142907549	6.18174
chr5	86804150	86805399	6.18111
chr8	4324000	4325899	6.17983
chr16	94568600	94571299	6.17904
chr19	6363550	6365249	6.17851
chr8	8689300	8690599	6.17835
chr5	134183550	134184549	6.17563
chr5	149050850	149054199	6.17112
chr2	75657400	75660749	6.1596
chr1	55086500	55089849	6.1585
chr7	126976000	126977099	6.14688
chr12	76368650	76371649	6.14591
chr11	29172850	29173649	6.14544
chr5	65696800	65699099	6.14528
chr3	16183100	16184249	6.1442
chr5	124482600	124484149	6.14084
chrX	8144350	8146249	6.13907
chr5	150664750	150666249	6.13899
chr1	163309050	163316249	6.13822
chr18	7608550	7609949	6.13694
chr6	87849500	87851649	6.132
chr11	51605350	51607749	6.12822
chr2	168205650	168207449	6.1167
chrX	42149250	42150599	6.11312
chr5	28316350	28318199	6.10966
chr19	10203100	10204649	6.10957
chr5	135186250	135188549	6.10717
chr5	115429700	115430899	6.10025
chr6	115675400	115677349	6.09595
chr12	70974550	70975699	6.09521
chr5	113771050	113772549	6.09444
chr11	101645850	101646449	6.09441
chr4	116625750	116627849	6.09215
chr11	19923900	19926099	6.07944
chr2	53190300	53192849	6.07635
chr15	81585300	81587049	6.07402
chr7	25753600	25755399	6.06991
chr11	102316200	102320199	6.06446
chr11	120233050	120241549	6.06207
chr18	10617600	10618849	6.06135
chr11	3201500	3203699	6.06075
chr16	33056000	33057399	6.06072
chr8	3492450	3493899	6.04557
chr11	104440500	104442999	6.04545
chr2	104815600	104817699	6.04422
chr6	72438400	72440499	6.0436
chr18	35598550	35599199	6.03719
chr9	21367800	21369149	6.03708
chr1	178335350	178338549	6.0364
chr14	27428750	27429899	6.03356
chr1	55026150	55027799	6.03174
chr4	130662700	130664549	6.03044
chr12	112828300	112829499	6.03008
chr8	84197100	84199599	6.02602
chr2	30066350	30068249	6.02491
chr13	55486550	55488099	6.02322
chr11	69919850	69921399	6.02264
chr1	166001100	166002699	6.02245
chr5	146832500	146834099	6.01477
chr7	34651650	34655899	6.01275
chr18	13969100	13972799	6.01131
chr4	120824600	120826249	6.01062
chr12	24707400	24709949	6.01006
chr11	59227250	59228399	6.00726
chr15	36792050	36794849	6.00652
chr2	156179050	156180349	6.00164
chr8	80738100	80739399	5.99895
chr1	172148050	172149549	5.99576
chr1	46851900	46854449	5.99564
chr15	51990400	51991799	5.98943
chr9	52047600	52049549	5.98409
chrX	18162500	18164649	5.98387
chr13	34875000	34876299	5.98272
chr1	191820800	191822199	5.98236
chr19	34878150	34879649	5.98201
chr11	106787000	106789999	5.97947
chr4	133812650	133815449	5.97613
chr4	119293400	119295349	5.97524
chr2	106693150	106695199	5.97501
chr10	95514900	95516149	5.97494
chr11	77606750	77608199	5.97422
chrX	152232900	152234399	5.96955
chr8	108703300	108705449	5.96819
chr11	98026200	98027899	5.96601
chr3	88949700	88951399	5.96461
chr15	77969800	77971749	5.96401
chr18	46524500	46525949	5.96399
chr10	37135600	37141299	5.9625
chr5	99976900	99978999	5.9621
chr10	53596850	53598599	5.95922
chr4	128726900	128728499	5.95844
chr9	103363950	103365749	5.95817
chr15	36609200	36610149	5.95786
chr13	98316050	98317599	5.95743
chr6	113377200	113378799	5.95685
chr19	7039050	7040149	5.95593
chr10	41518700	41520699	5.9556
chr19	18713100	18714049	5.95479
chr3	95014300	95016749	5.95364
chr12	111574450	111575549	5.95195
chr18	6489600	6491549	5.95157
chr2	91930350	91933449	5.95144
chr5	108461200	108462349	5.95065
chr4	81442100	81443349	5.95029
chr6	86523800	86528049	5.94907
chr10	7680450	7682149	5.94665
chr2	18063800	18065799	5.94584
chr11	5097450	5100149	5.94205
chr11	93885050	93887299	5.94201
chr2	126674100	126676649	5.94082
chr15	96284500	96289149	5.93814
chr9	100642250	100643449	5.93569
chr2	162930850	162932849	5.93466
chr3	152209300	152211799	5.93351
chr17	80060850	80062399	5.931
chr8	85024700	85025899	5.92947
chr7	127966800	127968899	5.92909
chr2	72475350	72477349	5.92893
chr11	35769350	35770449	5.92819
chr6	120665050	120668099	5.92758
chr1	133609300	133610499	5.92756
chr6	124916950	124918799	5.9271
chr13	111488650	111489999	5.92547
chr17	24168650	24170149	5.92408
chr7	34388250	34390449	5.92232
chr7	48881000	48881849	5.9173
chr8	111056200	111057399	5.91425
chr5	124351650	124355249	5.91008
chr16	30062800	30065099	5.91008
chr8	95806400	95807549	5.90744
chr13	119428300	119430399	5.90432
chr15	73183400	73185449	5.9035
chr4	134922700	134924899	5.90207
chr15	80255150	80256599	5.90141
chr10	4386900	4388699	5.90078
chr11	62550250	62552249	5.90071
chr7	24506650	24508299	5.89998
chr12	101082250	101084349	5.89989
chr4	48584400	48586899	5.89888
chr15	102470450	102471849	5.89882
chr12	73907950	73909249	5.89814
chr1	33813550	33814649	5.89764
chr17	23802400	23804599	5.8956
chr12	51828550	51830299	5.89335
chr9	36725850	36727449	5.8932
chr15	75908600	75909699	5.89162
chr7	127874950	127877599	5.88921
chr10	120473550	120478149	5.88753
chr12	34200350	34202049	5.88748
chr3	30102200	30108499	5.88604
chr5	120612400	120613499	5.88561
chr2	160646000	160647449	5.88283
chr4	136310850	136312549	5.88236
chr5	129019400	129021649	5.88212
chr13	98925350	98926999	5.88185
chr13	29983450	29986099	5.88171
chr8	40510800	40512349	5.88112
chr8	111642950	111643999	5.87937
chr1	10037300	10039149	5.87682
chr3	66976700	66983249	5.87571
chr14	101653650	101654399	5.87553
chr1	134560200	134561849	5.87514
chr11	11808250	11810849	5.87388
chr8	87957900	87960799	5.868
chr10	84440500	84441999	5.86669
chr11	50377700	50378799	5.86475
chr3	86141600	86142699	5.86378
chr3	60500550	60502449	5.86358
chr8	11554700	11557999	5.86344
chr9	120492150	120493299	5.8606
chr6	86404200	86405999	5.86038
chr11	53299450	53301699	5.86001
chr1	165641900	165643249	5.8586
chr6	65042400	65043649	5.85437
chr19	53599950	53601549	5.85432
chr5	106695450	106697249	5.85066
chr14	47648950	47650299	5.8479
chr7	35802200	35803099	5.84719
chr2	121413850	121414799	5.84707
chr11	88046750	88049099	5.84661
chr7	102441350	102442749	5.84526
chr18	56706750	56709449	5.84518
chr10	80149600	80152799	5.84406
chr17	88064050	88066199	5.84277
chr11	53350300	53352299	5.84273
chr7	141228250	141229749	5.83837
chr11	116030200	116031399	5.83766
chr12	11263700	11267199	5.83722
chr5	77265400	77267199	5.83544
chr4	148625750	148627199	5.83502
chr17	33684450	33685499	5.83323
chr16	78375250	78376849	5.8324
chr18	84083700	84089999	5.83146
chrX	94121200	94124049	5.82937
chr12	54729250	54729699	5.82893
chr3	32397050	32398299	5.82726
chr3	142880650	142882899	5.82551
chr4	136052000	136053399	5.82331
chr16	56028700	56030199	5.82307
chr3	58414350	58416749	5.82299
chr17	34950600	34953049	5.82003
chr4	8690400	8692699	5.81992
chr9	80066450	80068299	5.81741
chr7	105786800	105788249	5.81724
chr6	121109650	121110849	5.81548
chr2	49450750	49452599	5.81477
chr19	40830750	40832099	5.81332
chr13	96670150	96671449	5.81248
chr19	12793900	12796249	5.81203
chr2	4881350	4883599	5.807
chr5	76588650	76589449	5.80675
chr2	164878700	164879899	5.8065
chr9	56159900	56161049	5.8054
chr9	108002550	108003449	5.80076
chr12	17544850	17545899	5.80054
chr9	120127650	120129349	5.80042
chr2	59610800	59613899	5.79823
chr6	83455200	83457549	5.79803
chr18	24204900	24206949	5.79724
chrX	13279800	13283349	5.79622
chr8	84686400	84688149	5.7962
chr3	88530400	88534599	5.79588
chr14	121035450	121037449	5.79365
chrX	60404150	60404899	5.79335
chr13	75942750	75944199	5.78872
chr17	69416800	69417949	5.78756
chr17	36270700	36272099	5.78677
chr3	137864500	137866049	5.78481
chr9	70502700	70503899	5.78408
chr18	7868150	7870499	5.7831
chr19	7267000	7269599	5.78263
chr3	90293150	90294649	5.78214
chr9	71484450	71486099	5.78153
chr6	37870750	37872049	5.7812
chr4	41134850	41137149	5.77912
chr3	132683350	132684749	5.77613
chr7	16613750	16615249	5.77074
chr1	20819300	20820349	5.77071
chr18	88893300	88894699	5.77037
chr5	149635100	149637549	5.76748
chr5	32458900	32460549	5.76714
chr1	30948500	30950799	5.76614
chr11	120347200	120350849	5.76483
chr4	106908900	106913699	5.76431
chr13	21179400	21181449	5.76317
chr14	33446250	33447249	5.76088
chr18	14681650	14683599	5.76065
chr4	131872600	131874899	5.76024
chr15	64381900	64383299	5.75855
chr11	106158950	106161399	5.75778
chr4	127021200	127023199	5.75746
chr11	99229250	99231499	5.75596
chr7	70357650	70361749	5.75583
chr10	128035000	128036749	5.75388
chr1	87213500	87214749	5.75323
chr9	13827650	13828649	5.75304
chr5	142813200	142817799	5.7512
chr17	34119550	34123449	5.7499
chr4	155490900	155493099	5.74586
chr10	93160600	93162099	5.7458
chr3	65391500	65392649	5.74501
chr4	135352100	135354449	5.74472
chr11	21091150	21092399	5.74415
chr3	95929200	95930899	5.74116
chr2	154790800	154792449	5.73833
chr3	65527450	65529749	5.73794
chr10	80797400	80799599	5.73727
chr8	34805050	34809849	5.73588
chr12	8673600	8675699	5.73511
chr10	12868300	12869699	5.73506
chr6	17693750	17695049	5.73428
chr18	67774400	67775999	5.73278
chr16	96126700	96127849	5.72877
chr7	6154600	6156699	5.72803
chr16	48993200	48995099	5.72713
chr10	116580400	116582449	5.72523
chr7	81344200	81345549	5.72488
chr17	28800400	28802399	5.72481
chr7	30956000	30957699	5.72463
chr14	47297850	47299899	5.7234
chr7	13022850	13025749	5.71869
chr10	53629300	53630049	5.71837
chr5	149183350	149184349	5.71712
chr14	70765650	70767599	5.71491
chr6	31398750	31399849	5.71444
chr3	51276300	51277999	5.71273
chr18	42511400	42512699	5.7123
chr17	30004300	30005949	5.71181
chr5	27790600	27792599	5.71172
chr7	73556150	73558599	5.7116
chr7	102209400	102210299	5.70979
chr2	116974900	116977599	5.70576
chr19	7416750	7418599	5.70517
chr12	72760500	72761999	5.70503
chrX	105927900	105929449	5.70485
chr16	90220250	90221849	5.70389
chr5	138169750	138172899	5.7031
chr15	68257900	68259399	5.70307
chr7	127776350	127778299	5.70115
chr16	31274300	31275299	5.70077
chr2	30656850	30660649	5.69884
chr9	61370700	61374649	5.69879
chr15	83148400	83149799	5.69504
chr19	37375350	37376949	5.69437
chr8	57511850	57513249	5.69388
chr5	100037650	100040699	5.69351
chr2	160731000	160732399	5.69263
chr5	96160550	96163249	5.69075
chr13	104816400	104817749	5.69067
chr4	141546100	141547149	5.69051
chr3	41741850	41742549	5.6901
chr7	78782700	78783599	5.69007
chr1	72243550	72244299	5.68987
chr16	18247500	18248799	5.6864
chr19	11912300	11913249	5.68596
chr15	84923300	84924299	5.68526
chr3	138442150	138443649	5.68506
chr3	65956950	65958899	5.6831
chr6	8209150	8210049	5.68245
chr2	128966300	128968699	5.68232
chr5	150673650	150674699	5.68232
chr3	79286150	79287399	5.68045
chr17	3114000	3116049	5.67966
chr9	90113150	90115249	5.67929
chrX	51017500	51019299	5.67837
chr1	59763450	59764999	5.67313
chr13	56702700	56704249	5.67182
chr2	166152200	166155999	5.67025
chr7	28179350	28180849	5.66861
chr5	134312500	134316299	5.6682
chr1	182018500	182020749	5.66375
chr7	92668550	92669999	5.66103
chrX	77509500	77512649	5.65928
chr2	174857600	174859849	5.65913
chr8	11634200	11637199	5.65605
chr17	4993650	4997449	5.65565
chr7	118115050	118116249	5.65444
chr7	62463350	62464599	5.65354
chr3	30226100	30229949	5.64899
chr14	115040200	115043449	5.6476
chr11	94211450	94212649	5.64621
chr9	62341350	62344949	5.64582
chr6	47453500	47455549	5.64532
chr10	63022550	63025149	5.64489
chr11	97186350	97187999	5.6447
chr16	35983200	35984349	5.64346
chr11	103131750	103133049	5.64266
chr1	132476700	132478049	5.64202
chr11	51999400	52001299	5.63938
chr12	8771250	8773699	5.63884
chr19	30029750	30032049	5.63853
chr14	73142400	73144349	5.63764
chr14	52196100	52198199	5.63708
chr4	123663650	123665899	5.63673
chr17	27621850	27624049	5.63635
chr15	101283750	101284649	5.63504
chr12	85338700	85339649	5.63496
chr10	80115700	80116499	5.63415
chr8	79027750	79031699	5.63353
chr7	109174300	109176449	5.63102
chr14	61647350	61648899	5.63012
chr15	79027650	79028949	5.6297
chr11	62456450	62458799	5.62903
chr4	150371150	150373899	5.62558
chr17	17825800	17830549	5.62415
chr16	76371900	76374199	5.62393
chr17	25271950	25274499	5.6221
chr15	80082100	80083449	5.62124
chr15	31529800	31531949	5.6208
chr11	105180400	105182849	5.61887
chr6	117905950	117908749	5.61885
chr5	143314300	143315499	5.61783
chr3	95817850	95819399	5.61653
chr17	83350900	83352499	5.61652
chr17	87445600	87447749	5.61499
chr3	103967300	103969399	5.61263
chr5	147429600	147431649	5.61238
chr7	126501700	126503699	5.61202
chr5	131536700	131538849	5.60942
chr4	155601100	155602399	5.60896
chr19	5609400	5610699	5.6082
chr7	90442250	90444199	5.60815
chr19	14596300	14598149	5.60791
chr10	7954950	7957099	5.6058
chr13	23743850	23748549	5.60564
chr19	7040350	7041149	5.60538
chr11	116023550	116024549	5.60201
chr5	122158200	122159649	5.60136
chr17	56673300	56674299	5.59806
chr6	49262800	49264649	5.59745
chr4	46450400	46453149	5.59561
chr18	73702650	73704399	5.59406
chr4	132210850	132212149	5.59386
chr5	102069000	102070649	5.59318
chr9	9238150	9239499	5.59276
chr6	122339150	122340949	5.59273
chr2	157077900	157079849	5.59254
chr14	21830600	21832199	5.5919
chr9	94537250	94539049	5.59071
chr16	90283450	90284549	5.59036
chr18	34330400	34331649	5.58933
chr11	94327100	94328749	5.5888
chr11	101641100	101641849	5.5884
chr10	62449100	62450299	5.58801
chr10	43721950	43724149	5.58796
chr14	78536150	78536899	5.58793
chr12	51690600	51692099	5.5863
chr12	91587700	91590049	5.58565
chr6	52215400	52226199	5.58528
chr14	46787450	46788349	5.58444
chr1	180812050	180814749	5.58291
chr2	80580100	80581599	5.58095
chr11	6415150	6417249	5.58067
chr1	86440700	86443349	5.58029
chr9	119402150	119403649	5.5796
chr3	146499150	146500899	5.57853
chr18	65580150	65583099	5.57824
chr3	110249550	110251299	5.57809
chr14	26668750	26670299	5.57806
chr3	30506100	30510999	5.57758
chr13	24800750	24802549	5.57743
chr1	133024800	133025799	5.57617
chr4	24495950	24497349	5.57529
chr5	65762700	65765149	5.57369
chr15	102073800	102075449	5.57222
chr18	3507850	3509199	5.57033
chr1	78657850	78659049	5.57028
chr9	59485400	59487199	5.57024
chr12	87265750	87267649	5.56973
chr11	72607200	72608849	5.56738
chr10	43577900	43581349	5.56075
chr8	75108700	75110449	5.5607
chr1	168429150	168432199	5.5594
chr10	82762650	82764049	5.55487
chr9	115308850	115310549	5.55349
chr1	63112900	63115199	5.55289
chr4	48472700	48473549	5.55271
chr3	89164700	89165499	5.55256
chr4	128804850	128807099	5.55166
chr15	98092300	98093949	5.55148
chr17	35134850	35136299	5.55034
chr18	78236700	78239549	5.55028
chr11	77686150	77687999	5.54929
chr5	129500350	129502199	5.54913
chr3	122293000	122295399	5.54887
chr9	64172350	64174549	5.54884
chr10	128058050	128060649	5.54803
chr11	3288350	3293599	5.54703
chr1	151499650	151501199	5.54324
chr3	30792700	30794199	5.54286
chr8	86745000	86746749	5.54093
chr2	156862100	156863749	5.53959
chr8	106892150	106894099	5.53917
chr8	106935700	106936599	5.53837
chr18	34220800	34221849	5.53798
chr6	72898300	72900749	5.53703
chr14	49065550	49067349	5.53678
chr4	82504750	82507399	5.5367
chr6	71271550	71272849	5.53637
chr5	93205400	93207399	5.53602
chr15	37006350	37008299	5.53487
chr5	121204450	121205399	5.53428
chr6	71543800	71544899	5.53359
chr16	97850800	97852249	5.53356
chr1	181210700	181212799	5.5321
chr4	131919000	131921949	5.53103
chr15	12320950	12322749	5.53059
chr8	105170200	105171899	5.53053
chr19	21652800	21654199	5.52922
chr12	80945450	80946899	5.52921
chr14	21983850	21988399	5.52893
chr18	35562100	35563999	5.52873
chr16	46495750	46497849	5.52736
chr12	52502850	52505349	5.52721
chr11	109650600	109652149	5.5259
chr10	119238600	119241149	5.52461
chr9	45983600	45985349	5.52243
chr9	87729300	87731249	5.52157
chr17	29032600	29034499	5.52109
chr9	35210350	35211899	5.52105
chr12	8640700	8641649	5.52048
chr4	138217100	138217949	5.51952
chr8	107292750	107294649	5.51894
chr9	114561100	114565399	5.51869
chr3	55111950	55112949	5.51583
chr6	140623500	140624999	5.51526
chr2	75440200	75443599	5.51525
chr17	63499150	63500599	5.51474
chr17	34590850	34593849	5.51137
chr3	95658000	95660199	5.50939
chr2	34370950	34372799	5.50803
chr12	108791800	108794999	5.50785
chr15	78876450	78878349	5.50637
chr5	149319700	149323249	5.50587
chr12	91590150	91590999	5.50541
chr10	42761550	42762649	5.50363
chr14	13960200	13961399	5.50214
chr4	83485500	83487099	5.50192
chr11	60139300	60140949	5.50185
chr6	148944050	148946449	5.50123
chr11	109362250	109363649	5.50046
chr2	84742650	84744699	5.49798
chr10	117845000	117846749	5.49739
chr1	161982050	161985999	5.49734
chr13	8995300	8996549	5.49584
chr17	34030750	34033099	5.49418
chr7	110121950	110123149	5.49279
chr2	174329000	174331899	5.49238
chr11	82780600	82781999	5.49236
chrX	71555900	71557849	5.4923
chr3	123508550	123509349	5.49186
chr1	13372600	13374649	5.49165
chr6	113075150	113078749	5.49094
chr7	127511700	127513499	5.48952
chr9	78480200	78481749	5.48914
chr7	46918950	46920799	5.4891
chr10	84532850	84534549	5.48766
chr11	59809450	59810649	5.48683
chr8	48553100	48555349	5.4861
chr17	46555150	46556199	5.48596
chr7	3645200	3646399	5.48517
chr16	78576050	78577099	5.48459
chr4	133966300	133968749	5.48283
chr6	72347250	72347899	5.48158
chr13	69611700	69612849	5.48113
chr1	44101450	44102999	5.48046
chr17	35915800	35919649	5.47893
chr7	123123700	123124899	5.47866
chr11	120597300	120599249	5.47827
chr3	121426450	121428299	5.47791
chr4	155991900	155994049	5.47736
chr9	103304800	103306049	5.47692
chr1	15805100	15806599	5.47665
chrX	164075600	164076649	5.47555
chr11	115812850	115813799	5.47495
chr10	59879400	59880399	5.47436
chr13	54302550	54303849	5.47228
chr4	139351850	139352899	5.47139
chr13	22039650	22043049	5.47045
chr15	98870800	98872849	5.46947
chr5	33018050	33019899	5.4692
chr16	22264450	22267049	5.46903
chr14	105176050	105177899	5.46714
chr14	104521700	104522749	5.46643
chr5	121710850	121713249	5.46564
chr7	12478250	12479099	5.46181
chr11	119299000	119300949	5.46165
chr16	38087400	38090699	5.461
chr1	58391900	58393899	5.45988
chr10	22730650	22732399	5.45936
chr11	102817650	102819749	5.45849
chr18	73571650	73572449	5.4574
chr2	125122250	125123899	5.45719
chr13	24761050	24762449	5.457
chr1	177257000	177259349	5.45685
chr7	100607700	100608849	5.45584
chrX	74270850	74272049	5.45536
chr14	87415900	87417849	5.45379
chr8	35494650	35495749	5.45169
chr10	26373200	26376499	5.45143
chr8	121950050	121951849	5.4512
chr5	50057650	50059549	5.44986
chr19	46500100	46502649	5.44869
chr17	83176650	83179249	5.44737
chr1	161034050	161038399	5.44557
chr19	28009750	28012499	5.44535
chr2	91526700	91527649	5.44402
chr18	80206750	80207799	5.44393
chr9	108306200	108307499	5.44302
chr3	139074300	139075299	5.44236
chr1	155082100	155083449	5.44221
chr7	4914800	4916049	5.44138
chr11	87442850	87443349	5.44117
chr9	7183800	7185199	5.44025
chr11	52098600	52100049	5.4384
chr9	118040400	118041499	5.43646
chr11	79339000	79340649	5.43549
chr18	53861550	53863449	5.43532
chr1	58423050	58424199	5.4351
chr9	110116400	110118399	5.43452
chr4	116220400	116222449	5.43447
chr10	96617000	96618599	5.43428
chr12	25096300	25101649	5.43388
chr3	138142800	138144899	5.43316
chr1	51914600	51916149	5.43307
chr17	65782250	65784149	5.43255
chr19	53389550	53391699	5.43015
chr3	97226550	97227649	5.43011
chr7	45394700	45395849	5.42944
chr1	178317550	178320249	5.4279
chr7	44815800	44817449	5.42714
chr19	41263150	41264449	5.42711
chr4	98923500	98924849	5.42697
chr19	21271350	21273549	5.42624
chr15	39942750	39944599	5.42533
chr10	112928050	112929299	5.42431
chr5	36695100	36696449	5.42392
chr13	47104900	47106999	5.42023
chr12	35046650	35047899	5.41811
chr3	69003950	69006449	5.41776
chr5	137510100	137511399	5.41624
chr13	51645250	51646249	5.41541
chr1	64121750	64122949	5.41468
chr9	37488500	37490249	5.41287
chr11	46436900	46437749	5.41249
chr3	103279300	103280699	5.41184
chr4	132048250	132049299	5.41131
chr5	100820250	100821049	5.41038
chr7	100120550	100121999	5.41011
chr12	52604450	52604949	5.41007
chr16	44138500	44140749	5.4093
chr16	30587000	30588199	5.40832
chr5	73781050	73784249	5.40766
chr6	30047250	30049199	5.40755
chr18	73572700	73575049	5.40743
chr9	88481000	88482699	5.40736
chr5	33819800	33821899	5.40705
chr13	35741250	35742549	5.40687
chr18	6240700	6241599	5.40678
chr3	94837350	94838749	5.40652
chr12	69892300	69893349	5.406
chr19	5911950	5912799	5.40509
chr14	54894050	54895349	5.4046
chrX	68678550	68679999	5.40379
chr1	182340800	182341699	5.40367
chr13	55445150	55445999	5.40124
chr1	59669850	59671649	5.40041
chr10	79854550	79856049	5.40016
chr16	17200550	17201699	5.39968
chr12	113098300	113099349	5.39916
chr5	115489050	115490399	5.39882
chr4	21931100	21931849	5.39875
chr7	122969850	122970949	5.39866
chr14	115410850	115415599	5.39855
chr2	117249500	117250399	5.39753
chr5	129724950	129725699	5.39679
chr8	70352300	70353349	5.39427
chr5	130221950	130222899	5.39418
chr9	102834750	102835849	5.39347
chr14	18269800	18271049	5.39325
chr18	3382750	3383499	5.39318
chr6	136803250	136805099	5.39287
chr4	33030750	33032049	5.3927
chr3	30512550	30515749	5.39226
chr9	109094750	109096499	5.3921
chr11	51485400	51486049	5.39204
chr8	69625200	69625599	5.39196
chr3	116507450	116508149	5.39194
chr8	61487650	61488349	5.39181
chr5	123135750	123143799	5.39161
chr12	75595300	75596299	5.39012
chr17	62880250	62883699	5.38914
chr13	21749300	21751199	5.38904
chr9	56994650	56996599	5.38901
chr3	31093400	31096449	5.38847
chr2	157565750	157567149	5.38827
chr17	56934650	56935649	5.38731
chr14	31205250	31206849	5.38728
chr11	21238250	21239799	5.38674
chr9	101073100	101075599	5.38465
chr10	117709850	117711199	5.38405
chr9	82973500	82977099	5.38283
chr7	109519150	109520199	5.38265
chr3	90508650	90509549	5.37952
chr3	135690600	135692149	5.37952
chr8	128685050	128686849	5.37939
chr2	27474150	27475749	5.37886
chrX	162760400	162761649	5.37854
chr3	89213500	89215149	5.37641
chr17	48408050	48409699	5.3735
chr4	135854950	135857899	5.37268
chr3	87906150	87907499	5.37162
chr2	110017800	110018749	5.37019
chr13	5860450	5861299	5.36824
chr15	25773000	25775799	5.36749
chr11	69632800	69633799	5.36676
chr1	133131250	133132549	5.36647
chr10	125966150	125967749	5.36615
chr2	103795700	103798299	5.36566
chr13	42051900	42053199	5.3655
chr19	38930500	38931949	5.36502
chr3	40799900	40800999	5.36333
chrX	73965050	73968449	5.36265
chr4	129334250	129335399	5.36261
chr2	85036600	85038299	5.36188
chr12	105784250	105785749	5.36103
chr10	80755100	80756249	5.361
chr2	60209250	60210999	5.35971
chr2	70824200	70825899	5.3573
chr14	34673800	34674849	5.35674
chrX	103979750	103981649	5.35659
chr6	125163750	125165649	5.35509
chr7	99350750	99353699	5.35438
chr11	96788850	96790199	5.35209
chr2	75436850	75439799	5.35171
chr2	154569000	154569899	5.35122
chr6	134034650	134036899	5.35101
chr2	15055250	15056149	5.3504
chr15	34082300	34084049	5.34957
chrX	104413050	104414249	5.34925
chr7	44985750	44986449	5.3492
chr7	109191650	109192799	5.34919
chr1	156558650	156559649	5.34913
chr10	36974050	36975599	5.34822
chr5	67260350	67261499	5.34789
chr19	45058500	45059649	5.34722
chr4	58911150	58913099	5.34681
chr18	61555200	61557499	5.34555
chr6	133105150	133105849	5.34554
chr17	57030650	57031599	5.34537
chr5	23432300	23435949	5.34504
chr11	114668500	114669899	5.34409
chr1	30872700	30874299	5.34281
chr13	21716350	21719149	5.34275
chr3	51339900	51342249	5.34198
chr2	30706600	30709499	5.34125
chr7	45215550	45217499	5.34064
chr16	94369900	94372049	5.3385
chr5	124424600	124426299	5.33697
chr8	14888050	14889199	5.33697
chr6	87980600	87982299	5.33561
chr2	78868200	78870299	5.3354
chr16	33966350	33967249	5.33514
chr7	75455500	75456199	5.33425
chr9	40799350	40802699	5.33415
chr1	162739250	162741049	5.33399
chr1	181150950	181151599	5.33316
chr13	54693150	54694799	5.33229
chr11	50324750	50325699	5.33214
chr1	160212000	160213849	5.33132
chr4	117189400	117190099	5.33073
chr7	19561600	19562499	5.33061
chr1	57405850	57407399	5.32996
chr4	42999150	43000549	5.32943
chr11	51263100	51263999	5.32925
chr11	96976900	96977799	5.32775
chrX	52611900	52618499	5.32585
chr4	153957150	153958399	5.32516
chr2	18027600	18029399	5.32509
chr9	72110500	72112349	5.32486
chr4	149425550	149426699	5.32486
chr9	70542450	70543599	5.32469
chr4	117154900	117156149	5.32249
chr3	95994750	95996699	5.32244
chr11	88099200	88099999	5.3221
chr7	127207700	127208499	5.32027
chr10	82629250	82630749	5.3194
chr11	20201300	20202249	5.31919
chr11	22990250	22991349	5.31881
chr5	129787300	129788349	5.31812
chr18	10725450	10726899	5.31811
chr11	60536300	60539349	5.31776
chr2	127586950	127587999	5.31717
chr4	137356650	137357699	5.31671
chr11	97628900	97629749	5.3167
chr1	178405200	178407099	5.3142
chr1	191717500	191719349	5.31418
chr3	108721100	108722249	5.31376
chr6	38298200	38299399	5.31264
chr7	35646800	35647449	5.31237
chr14	27069650	27070899	5.31158
chr12	112673100	112675099	5.31085
chr2	121955550	121957249	5.30952
chr10	67002000	67005699	5.30909
chr15	81398600	81400749	5.3087
chr4	134287350	134288249	5.3087
chr5	108065600	108066549	5.30828
chr19	59942950	59943799	5.30581
chr7	133120200	133125099	5.30572
chr8	70509400	70511099	5.30555
chr9	120110250	120111299	5.30496
chr14	56811850	56813099	5.30398
chr7	64872150	64873049	5.30291
chr10	79766300	79767049	5.30177
chr9	15306100	15307549	5.30131
chr1	176813100	176814199	5.30024
chrX	11663650	11665749	5.30003
chr12	25094900	25096049	5.299
chr10	61782400	61784449	5.29638
chr6	88897750	88898949	5.29607
chr13	28949650	28953649	5.296
chr11	101657750	101658399	5.29599
chr13	21530300	21531199	5.29509
chr10	80432100	80434049	5.29486
chr13	24831600	24832799	5.2941
chr5	115272050	115272949	5.29225
chr5	3647000	3648049	5.29213
chr17	32283550	32285149	5.29111
chr16	16870750	16871549	5.28994
chr7	28350650	28351599	5.28957
chr15	5116600	5117499	5.28785
chr6	122485950	122486599	5.28719
chr15	59646650	59649699	5.28546
chr17	69382750	69384549	5.28536
chr2	93045650	93046599	5.2846
chr12	9029750	9031149	5.28456
chr9	72639150	72641399	5.28373
chr5	9160600	9162449	5.28235
chr7	110613800	110615549	5.28233
chr16	8830050	8831349	5.28076
chr1	153486650	153487999	5.28063
chr1	189007050	189007849	5.28037
chr18	46741350	46742649	5.28019
chr11	113785500	113786749	5.27706
chr6	22026000	22027749	5.27681
chr6	97204900	97205649	5.27679
chr11	97662150	97664849	5.27546
chr12	4916950	4918549	5.2754
chr1	171328350	171330349	5.27469
chr13	63562550	63566299	5.27445
chr7	133708600	133709799	5.27346
chr1	86358200	86359499	5.2734
chr11	88716650	88719099	5.27277
chr10	111009100	111011499	5.27173
chr17	34586350	34588149	5.27154
chr7	97579550	97581549	5.27116
chr6	125008950	125010199	5.2709
chr9	8002800	8005199	5.27076
chr9	33104050	33105749	5.27043
chr18	34758750	34760249	5.26816
chr5	64802250	64804699	5.26812
chr13	48869800	48871799	5.26721
chr9	32540000	32545199	5.26688
chr2	83644400	83645399	5.2664
chr13	98814250	98815899	5.26601
chrX	42067550	42069749	5.26484
chr12	85454450	85455249	5.26382
chr19	7205450	7207049	5.26378
chr9	66591600	66593049	5.26295
chr2	57123200	57124649	5.2627
chr16	50431200	50432449	5.26154
chr14	79389600	79391349	5.2601
chr2	60879800	60882299	5.25875
chr14	31130700	31131999	5.25864
chr2	168668450	168669549	5.25825
chr13	73603500	73603999	5.25809
chr19	36925500	36926899	5.25762
chr2	166905900	166906899	5.25734
chr13	21810350	21812449	5.25686
chr10	75921100	75921999	5.25588
chr15	66577550	66578399	5.25341
chr14	62331550	62333149	5.25326
chr6	29734950	29737049	5.25292
chr7	121033850	121035899	5.25287
chr4	24966300	24967199	5.25162
chr19	60226050	60226799	5.25152
chr9	102717200	102719299	5.25102
chr5	20950650	20952199	5.25011
chr12	82169400	82170499	5.24887
chr16	15636600	15638499	5.24821
chr11	6474800	6476699	5.24804
chr14	121107250	121109699	5.24774
chr18	80150700	80151799	5.24748
chr8	84969100	84970549	5.24629
chr12	71015950	71017199	5.24624
chr17	12991300	12993249	5.24614
chr10	80398000	80399549	5.24514
chr7	135715350	135716499	5.24484
chr10	62650200	62652199	5.24425
chr7	92873650	92875149	5.2437
chr3	135438300	135440349	5.24284
chr3	158035750	158037199	5.24272
chr7	127231800	127233999	5.24228
chr1	60408850	60410499	5.24206
chr8	27085100	27088099	5.24018
chr10	77621600	77623199	5.23926
chr11	49202400	49204699	5.23898
chr1	34841550	34843549	5.23835
chr19	8941800	8942949	5.23803
chr2	165992650	165993099	5.23715
chr17	32363500	32364549	5.23658
chr9	108516200	108518399	5.23597
chr11	86356600	86358399	5.23589
chr2	153345050	153347699	5.23508
chr1	172026450	172027899	5.23454
chr14	75844150	75846199	5.23433
chr17	80205550	80207299	5.23316
chr6	113306300	113308049	5.23218
chr7	5080200	5081199	5.23195
chr3	69043500	69044749	5.23144
chrX	8252300	8253049	5.2313
chr12	26414250	26415449	5.23101
chr16	72662650	72664349	5.23043
chr11	115563700	115565099	5.22982
chr9	96630600	96631599	5.22969
chr11	23497300	23497999	5.22967
chr16	16302450	16303949	5.22929
chr4	155812400	155813249	5.22881
chr6	7844750	7845699	5.2281
chr18	60747500	60749249	5.22745
chr13	17803100	17805949	5.22422
chr16	20672750	20674199	5.22375
chr17	70847650	70854099	5.22368
chr4	134852200	134853349	5.22349
chr2	74711000	74715899	5.22329
chr1	74505150	74507299	5.22198
chr1	178527450	178529899	5.22148
chr9	69397750	69398699	5.22081
chr18	75000450	75001849	5.22073
chr5	3543750	3544649	5.22043
chr12	87471250	87472349	5.21983
chr7	44553150	44554549	5.21872
chr4	116150100	116151049	5.21868
chr2	90940100	90941499	5.21752
chr4	15957800	15958749	5.21603
chr18	3336650	3337599	5.21576
chr2	163995050	163996049	5.21547
chr11	101315750	101316649	5.21518
chr18	54982250	54992599	5.21483
chr11	80383200	80384299	5.2141
chr2	180919850	180920999	5.21365
chr15	96698200	96700249	5.2134
chr14	21498700	21501549	5.2119
chr4	136835150	136836849	5.21185
chr6	35177200	35178199	5.21065
chr5	140418100	140420049	5.20991
chr6	38550700	38552999	5.20958
chr6	50984650	50985799	5.20838
chr18	32067200	32068549	5.2073
chr9	110531600	110533599	5.20552
chr8	20550200	20550949	5.20478
chr15	96459500	96460999	5.2046
chr2	165034150	165034849	5.20409
chr17	35241400	35243749	5.20395
chr4	136601750	136602849	5.20349
chr5	73292700	73293699	5.20214
chr6	11906800	11908149	5.20171
chr5	117115150	117116299	5.20117
chr18	34953150	34955799	5.20073
chr5	115010750	115012349	5.20073
chr15	79441250	79442549	5.20073
chr15	99972100	99974149	5.19986
chr1	136415200	136415849	5.19973
chr5	136565850	136567649	5.19937
chr4	133010800	133013649	5.199
chr16	95844550	95850199	5.19818
chr11	54786800	54787699	5.19591
chr8	77516900	77517949	5.19579
chr11	4848800	4849499	5.19523
chr17	4907400	4908849	5.19504
chrX	37126750	37127599	5.19483
chr2	14073100	14074999	5.19418
chr7	127745250	127747349	5.19278
chr13	64152200	64153549	5.19275
chr18	34776950	34778099	5.19217
chr5	30912200	30913299	5.19171
chr11	68901550	68902849	5.1913
chr5	15934350	15935299	5.19113
chr8	22476200	22477799	5.19086
chr13	95324450	95327649	5.18982
chr19	8967200	8968199	5.18944
chr4	108458900	108460899	5.18871
chr17	74338750	74339849	5.18833
chr2	180171500	180172799	5.18826
chr3	99666350	99667899	5.18811
chr4	136469700	136471199	5.18768
chr7	127024900	127027899	5.18628
chr8	94917650	94918299	5.18535
chr3	30010100	30015349	5.18522
chr6	11925400	11926749	5.18475
chr10	67284250	67285849	5.1841
chr14	20734000	20734649	5.18368
chr1	39900150	39902749	5.18155
chr7	24883950	24885699	5.18012
chr16	4212950	4214099	5.18004
chr5	45520250	45520849	5.17944
chr4	126255300	126257199	5.17938
chr11	83271150	83271599	5.17917
chr16	70561800	70563599	5.17898
chr11	69670800	69672349	5.1782
chr2	6322200	6323899	5.17655
chr13	9093750	9094849	5.17655
chr11	32642000	32643799	5.17531
chr1	156938300	156940049	5.17414
chr8	109778350	109779449	5.17366
chr5	104508250	104508999	5.1732
chr2	38350350	38353149	5.17269
chr18	34506050	34507649	5.1725
chr5	124540700	124541699	5.17139
chr8	83899750	83901349	5.17051
chr8	78820300	78821399	5.1703
chr13	22034050	22035649	5.16998
chr3	88553000	88554449	5.16953
chr5	115157150	115159499	5.16874
chr11	23305600	23307699	5.16678
chr13	51100800	51101849	5.16654
chr18	69344450	69348399	5.16629
chr2	157461900	157465799	5.16612
chr18	75366000	75370999	5.16607
chr14	56886600	56887999	5.16604
chr19	6045700	6047749	5.16587
chr11	74723000	74724999	5.16582
chr1	162013600	162020749	5.16564
chr10	40882400	40884749	5.1653
chr14	28504150	28507749	5.16527
chr11	94320750	94322649	5.16509
chr13	59993450	59994299	5.16504
chr9	64022050	64022999	5.16498
chr14	56885350	56886349	5.16475
chr11	108920000	108923049	5.16411
chr8	13105650	13106349	5.16402
chr8	70698950	70700699	5.16384
chr17	88440650	88442299	5.16344
chr8	72135150	72137849	5.16279
chr5	65390200	65391449	5.16258
chr7	4811500	4812749	5.16198
chr3	95217050	95218449	5.15951
chrX	36597850	36599799	5.15931
chr4	72199150	72201049	5.15895
chr13	21830550	21835199	5.15893
chr17	79895100	79896149	5.15793
chr13	56134500	56136249	5.15763
chr14	50061350	50062849	5.15731
chr1	38128900	38130299	5.1565
chr2	69897200	69898149	5.15582
chr11	5520900	5522099	5.15482
chr4	137993400	137994549	5.1536
chr7	80024850	80027799	5.15345
chr6	52226350	52235449	5.15298
chr8	57651600	57653099	5.15264
chr15	98662200	98662999	5.15158
chr1	180725550	180726949	5.15157
chr13	54686250	54688299	5.15062
chr5	135393650	135394999	5.15021
chr10	80622600	80624049	5.15013
chr9	46012650	46013849	5.14982
chr1	80339550	80340849	5.14927
chr9	107980550	107985849	5.14878
chr7	120981700	120982299	5.14814
chr15	89195650	89196649	5.14781
chrX	8096150	8096999	5.14765
chr9	99568100	99568999	5.14727
chr12	54719250	54719699	5.1472
chr10	67548050	67549899	5.14714
chr5	114774150	114775249	5.14652
chr7	127614300	127616049	5.14576
chr18	54952150	54953349	5.14564
chr18	77064800	77066099	5.14541
chr14	14703000	14704299	5.1447
chr16	32277300	32278299	5.14384
chr2	129800550	129801899	5.14338
chr11	83472450	83473999	5.14247
chr4	99120150	99121149	5.14165
chr6	128437200	128439249	5.14149
chr9	108490650	108491549	5.14142
chr14	52103050	52104099	5.13997
chr13	78197050	78200149	5.13993
chr16	4593600	4597449	5.13971
chr11	98201900	98203699	5.13855
chr12	85373900	85375349	5.13838
chr3	153911900	153913049	5.13818
chr13	59991250	59993149	5.13786
chr2	18054700	18056599	5.13762
chr1	127774150	127775399	5.1376
chr2	94406000	94407099	5.13723
chr7	36696350	36698999	5.13713
chr19	29805350	29806799	5.13701
chr11	86201300	86202099	5.13667
chr16	44173200	44174049	5.13628
chr12	69372050	69373549	5.13555
chr16	23988150	23989299	5.13537
chr17	71183500	71184349	5.13487
chr9	25251500	25253749	5.13394
chr11	87403850	87404549	5.1325
chr6	108828550	108829399	5.13228
chr10	98913650	98916199	5.13144
chr6	136827200	136828249	5.13107
chr3	138527150	138528449	5.12992
chr9	72531650	72533299	5.12991
chr11	87461950	87462399	5.12933
chr15	11994300	11996149	5.12774
chr7	116333300	116334799	5.12735
chr8	83996500	83998049	5.1273
chr17	65612200	65614749	5.12509
chr17	56040250	56041299	5.1242
chr16	20097400	20098499	5.12415
chr2	132251700	132253249	5.12393
chr8	104442250	104443199	5.12321
chr14	26579400	26580299	5.1229
chr1	152901700	152903249	5.12241
chr5	34335700	34337749	5.12238
chr18	62547800	62548899	5.12085
chr2	170129750	170131199	5.12067
chr3	97296950	97299199	5.12043
chr1	139421750	139422949	5.12
chr10	81105450	81106699	5.1187
chr7	83882850	83885049	5.11817
chr12	98920250	98920899	5.11807
chr11	84879700	84881099	5.1174
chr9	96982650	96984049	5.11707
chr4	52438200	52439949	5.11587
chr15	103238900	103241799	5.11585
chr5	43781300	43782749	5.11476
chr15	96640800	96643649	5.11471
chr3	108910450	108912399	5.11375
chr2	64097300	64099149	5.11294
chr5	122422050	122423099	5.11251
chr6	88044650	88045249	5.11236
chr2	127906150	127909449	5.11229
chr8	48555450	48556449	5.11204
chr6	8509350	8510649	5.112
chr5	13125400	13127249	5.1112
chr17	56302800	56305299	5.11026
chr17	84789850	84791199	5.10989
chr4	122885250	122887099	5.10977
chr1	138836500	138843099	5.10963
chr4	116074700	116076999	5.10946
chr9	106356550	106358249	5.10788
chr3	51415650	51417099	5.10644
chr4	132768250	132768999	5.10614
chr11	16507450	16508699	5.1055
chr2	25607600	25608499	5.10526
chr14	16364550	16366599	5.10514
chr7	45126750	45130199	5.104
chr17	27203200	27204599	5.10376
chr4	134467900	134469099	5.10313
chr18	35887250	35890399	5.1031
chr8	11311500	11313649	5.10297
chr2	154891850	154892899	5.10224
chr16	11133700	11134699	5.10207
chr11	109900800	109902749	5.10167
chr17	80727300	80728349	5.10128
chr3	101394700	101399499	5.10105
chr10	128977750	128978949	5.09977
chr8	69774350	69775049	5.09961
chr3	103058300	103058999	5.0994
chr13	103773350	103774699	5.0993
chr11	49711700	49713299	5.09899
chr3	63976150	63977249	5.09695
chr9	65140450	65142549	5.09562
chr12	108179500	108180399	5.09556
chr3	129532350	129534649	5.09549
chr4	108832350	108834299	5.09488
chr12	8498900	8500049	5.09458
chr8	13338800	13339699	5.09433
chr9	53666550	53667599	5.0939
chr4	155705050	155705799	5.09237
chr2	179976350	179977549	5.09133
chr5	100673700	100674299	5.09054
chr1	175880400	175881549	5.09041
chr18	60525700	60526949	5.08981
chr2	180041600	180043199	5.08972
chr10	120719600	120722349	5.08958
chr13	119789800	119791849	5.08821
chr8	70673300	70674149	5.08741
chr14	54924650	54927449	5.08702
chr8	86884550	86885349	5.08692
chr3	58576550	58577599	5.08624
chr6	128361950	128363549	5.08624
chr9	54863650	54864599	5.08604
chr2	74695900	74701599	5.086
chr7	116442700	116443449	5.08412
chr15	12117350	12119199	5.08275
chr15	81466250	81467299	5.08211
chr4	58670800	58672349	5.0818
chr9	106885750	106887149	5.08114
chr11	17159250	17160399	5.08071
chr9	107553500	107554399	5.08056
chrX	157597200	157599349	5.08054
chr2	18045350	18048849	5.07982
chr3	69316200	69316899	5.07896
chr2	84714300	84715249	5.07876
chr2	122028600	122029449	5.07865
chr11	60104900	60107399	5.07851
chr3	54734300	54736249	5.07813
chr16	10834950	10835549	5.07802
chr13	54621700	54622549	5.07757
chr2	33638000	33646099	5.07713
chr13	100650500	100652449	5.07669
chr17	31657900	31658799	5.07652
chr8	70609600	70610849	5.07616
chr4	76448700	76450799	5.07597
chr5	142817900	142824249	5.07562
chr5	38560850	38562499	5.0755
chr2	156110900	156112049	5.07548
chr6	92090850	92093099	5.07528
chr11	60878050	60879549	5.07403
chr7	105810350	105811049	5.07398
chr6	149309250	149310149	5.07378
chr10	68278550	68279349	5.07336
chr8	46739100	46741999	5.07294
chr6	72216000	72216849	5.07243
chr2	32150750	32151949	5.07235
chr1	192854400	192856549	5.0723
chrX	7713750	7714699	5.07224
chr6	13677050	13677899	5.07071
chr18	84588500	84590399	5.07012
chr9	62811150	62812299	5.06988
chr14	67071100	67072549	5.06947
chr1	151344500	151345949	5.06945
chr2	152669400	152670999	5.06912
chr4	21847550	21848599	5.0676
chr16	4718400	4719699	5.06641
chr12	84996250	84997249	5.06608
chr5	34369250	34370849	5.06563
chr16	55143200	55144649	5.06464
chr18	23954100	23955399	5.06439
chr6	100286450	100287449	5.06385
chr11	80428600	80429599	5.06306
chr4	11190050	11192299	5.06222
chr4	40970350	40971749	5.06216
chr17	20945350	20946499	5.06082
chr5	122371650	122373149	5.06055
chr10	62791300	62793049	5.06044
chr7	142532850	142533949	5.05978
chr6	83165650	83166349	5.05972
chr12	59130600	59132049	5.05964
chr7	67950500	67954349	5.05963
chr4	140701400	140703999	5.05874
chr9	72806250	72808699	5.05762
chr4	126201550	126202699	5.0573
chr3	88685750	88686849	5.05612
chr6	30895850	30896899	5.05528
chr4	44756650	44757349	5.05506
chr15	9070300	9072399	5.05503
chr2	32961450	32963149	5.05467
chr18	16808050	16809949	5.05333
chr11	59838950	59839899	5.05297
chr5	114379850	114381299	5.0523
chrY	90784150	90784849	5.05167
chr3	101603550	101604699	5.05141
chr18	35829300	35832699	5.05134
chr4	151128000	151129349	5.05109
chr6	51171150	51178299	5.05076
chr13	58214850	58216249	5.05063
chr5	72914400	72915649	5.05032
chr6	36898000	36899199	5.04953
chr4	3937150	3938399	5.04925
chr2	25982300	25983149	5.04721
chr11	115603350	115604749	5.04695
chr18	24121000	24122349	5.04592
chr5	136810000	136811099	5.04504
chr2	80315100	80316299	5.04442
chr8	85299000	85300549	5.04346
chr10	117062800	117064499	5.04338
chr18	35771350	35772699	5.04336
chr12	101975100	101976849	5.04216
chr2	92182700	92186049	5.04187
chr8	85026550	85027699	5.04173
chr16	93832200	93833049	5.04057
chr6	125008400	125008849	5.04011
chr7	28597600	28598249	5.03918
chr19	60889650	60890599	5.03741
chr16	73095450	73096499	5.03705
chr15	93397750	93398899	5.03703
chr14	24490700	24491849	5.03652
chr1	182409100	182409849	5.03593
chr5	21054600	21056049	5.03593
chr5	93092650	93095399	5.0355
chr19	57361000	57361949	5.03524
chr8	111299450	111300299	5.03467
chr17	46890700	46891299	5.03447
chr15	76080100	76081499	5.03363
chr17	12916300	12917399	5.03306
chr16	18287800	18289349	5.03262
chr19	53944800	53945799	5.03196
chr8	31149850	31150999	5.03192
chr8	116921050	116922299	5.0313
chr13	21720650	21721949	5.03049
chr19	29250850	29251699	5.02977
chr2	102449950	102451999	5.02862
chr9	43104700	43106399	5.02861
chr18	54976550	54980149	5.02819
chr3	9250500	9252099	5.02727
chr4	121214250	121215149	5.02714
chr4	108779950	108781049	5.02696
chr4	124801900	124803149	5.02599
chr8	120408100	120409499	5.02572
chr8	70896300	70897549	5.02409
chr11	98794250	98797099	5.02318
chr8	88361300	88362299	5.02258
chr11	97698100	97700949	5.02137
chr17	8165050	8165999	5.02109
chr5	44226050	44227549	5.02086
chr4	132344950	132345799	5.02071
chr2	135658500	135659849	5.01963
chr15	82046500	82047849	5.01862
chr13	94976250	94976749	5.01848
chr9	31030250	31031499	5.0183
chr16	91688250	91688799	5.01809
chr6	4600200	4602649	5.01808
chr10	79852750	79854349	5.01785
chr2	167420800	167422749	5.01714
chr11	87470850	87471499	5.01685
chr8	79398250	79399499	5.0167
chr4	12171000	12171949	5.01607
chr2	74682100	74694149	5.01533
chr5	75149550	75157199	5.01515
chr9	108783050	108784499	5.01477
chr11	88067550	88069349	5.01459
chr10	79908450	79909249	5.01343
chr2	157203600	157205299	5.0132
chr11	116842100	116844099	5.01173
chr2	180709000	180710899	5.01163
chr7	89979700	89981699	5.01157
chr12	44209400	44210099	5.01139
chr10	82860150	82861399	5.01139
chr5	119795650	119799199	5.01128
chr4	152477650	152478249	5.01074
chr1	63176200	63177949	5.01047
chr5	3927850	3928949	5.01023
chr6	54816650	54818099	5.00955
chr1	136624850	136625849	5.00866
chr6	124740250	124741699	5.00847
chr10	80292400	80293749	5.00816
chr7	65370400	65371749	5.00781
chr2	48949500	48950549	5.00753
chr2	35661350	35662199	5.00735
chr3	96261800	96264499	5.00719
chr5	65536350	65538349	5.00693
chr12	12939200	12943349	5.00692
chr2	20967800	20969649	5.00642
chr11	96004050	96008599	5.00636
chr10	58446050	58447699	5.00588
chr16	96081550	96082749	5.00544
chr3	138526450	138526999	5.00516
chr7	142558700	142559799	5.0046
chr4	117288600	117289999	5.00427
chr5	45856650	45857999	5.00371
chr12	78748850	78749749	5.00354
chr7	30588000	30588749	5.00265
chr2	122630550	122631699	5.00249
chr9	65826600	65827749	5.00131
chr9	35420950	35422499	5.00128
chr2	164070350	164071149	5.00126
chr3	99311100	99313349	5.00072
chr4	48539700	48541699	5.00046
chr18	34930950	34931999	4.99847
chr1	85793350	85794499	4.99801
chr17	83213650	83217449	4.99771
chr8	105518650	105519849	4.99681
chr13	66932550	66933699	4.99667
chr5	29735500	29736799	4.9965
chr11	119023000	119024099	4.99625
chr13	21733650	21736299	4.99601
chr8	109564900	109565849	4.995
chr8	122567950	122568999	4.99422
chr4	59626200	59626999	4.99414
chr2	157278700	157279899	4.99364
chr7	99482650	99483649	4.99362
chr3	6380950	6384949	4.99287
chr4	149737250	149738049	4.99176
chr12	80111450	80116349	4.9914
chr18	77773350	77774799	4.9911
chr2	181187150	181188699	4.99107
chr11	87421900	87422949	4.99035
chr7	122066250	122068299	4.99026
chr12	33956150	33960549	4.98996
chr12	3309100	3309999	4.9886
chr14	56668200	56669149	4.98821
chr10	57486350	57487449	4.9881
chr9	120933400	120934999	4.98787
chr5	34949400	34950449	4.98756
chr2	166151150	166152049	4.98738
chr4	132260450	132261349	4.9858
chr13	43479450	43482199	4.98519
chr18	10181200	10182149	4.98479
chr7	133636900	133637549	4.98397
chr5	88675050	88676249	4.9831
chr1	64532150	64534149	4.98309
chr4	32238250	32240699	4.98263
chr11	78163400	78165599	4.98255
chr9	100643500	100645049	4.98224
chr8	33641250	33642499	4.98162
chr3	103020100	103021799	4.98128
chr14	60250800	60251449	4.98032
chr19	47313800	47314849	4.9803
chr2	144269350	144271399	4.97884
chr17	17489450	17491199	4.97882
chr9	121719150	121720099	4.97874
chr1	163403050	163404149	4.97874
chr5	88765200	88765999	4.97873
chr2	74703400	74708149	4.97847
chr17	5840600	5842099	4.97837
chr3	129830150	129831449	4.97818
chr7	82866350	82869149	4.97672
chr12	51347400	51349399	4.97629
chr1	191574150	191576149	4.97625
chr15	79545300	79546649	4.97619
chrX	136740250	136741299	4.97445
chr5	125388700	125390599	4.97423
chr5	142960350	142962799	4.97395
chr11	87109150	87111249	4.97311
chr5	140703950	140704849	4.97246
chr19	29521450	29523799	4.97243
chr13	23682550	23683999	4.97235
chr15	12823800	12824749	4.97234
chr17	63864000	63864699	4.97218
chr2	167630850	167632099	4.9718
chr5	90365050	90367299	4.97165
chr10	80826600	80827399	4.97086
chr11	87986400	87987599	4.97027
chr5	119832750	119834199	4.97002
chr1	55131150	55132349	4.96901
chr17	74293950	74295899	4.96821
chr8	109705500	109706349	4.96814
chrX	38563800	38565099	4.96805
chr16	87494850	87496599	4.96757
chr1	86064300	86065349	4.96738
chr3	122984550	122985499	4.96696
chr8	72723250	72724149	4.96695
chr14	103098450	103099899	4.9668
chr9	50856100	50857799	4.96626
chr13	23535350	23536949	4.96611
chr13	60174550	60177549	4.96514
chr12	69168300	69169149	4.96475
chr1	46830600	46831949	4.96455
chr3	30418200	30420399	4.96401
chr18	31759300	31760549	4.96338
chr1	161249550	161251199	4.96287
chr13	23738100	23741199	4.96282
chr8	126591800	126594499	4.96272
chr11	95384550	95385699	4.96188
chrX	57053000	57054099	4.96152
chr6	124755950	124757299	4.96133
chr2	52424000	52425699	4.96075
chr8	106210350	106211649	4.96004
chr17	10317500	10320449	4.95981
chr11	101551000	101551949	4.95964
chr1	9942700	9944199	4.95903
chr6	30524300	30530199	4.95841
chr10	20311450	20313599	4.95792
chrX	134059150	134060249	4.95786
chr7	28810800	28812099	4.95751
chr5	24451400	24452849	4.95749
chr15	80133000	80134149	4.95744
chr6	134897450	134898799	4.95699
chr12	111538100	111539349	4.95651
chr7	105777550	105779249	4.95634
chr16	36070850	36072649	4.9562
chr4	154011400	154012799	4.95614
chr5	119802750	119806799	4.95602
chr7	112679400	112680599	4.95572
chr14	62759500	62761049	4.955
chr16	33380100	33381899	4.95492
chr2	31759400	31761699	4.95489
chr12	116405400	116406349	4.95436
chr16	55166800	55168699	4.95434
chr10	56377150	56379549	4.9543
chr9	72274500	72276199	4.95388
chr13	85288250	85289299	4.95339
chr2	131261750	131263699	4.95318
chr8	84066750	84067299	4.95275
chr1	119051800	119054599	4.95181
chr8	8659100	8661199	4.95179
chr13	23580600	23585949	4.95179
chr11	79993050	79994149	4.95143
chr17	71474750	71476349	4.95125
chr2	144009950	144011349	4.95114
chrX	51204400	51206249	4.95001
chr2	59160800	59161799	4.94982
chr12	83631550	83633449	4.94927
chr4	149306550	149307849	4.94883
chr2	168229800	168231199	4.94861
chr16	32332250	32333399	4.9482
chr17	26252550	26253899	4.94761
chr18	79107800	79110699	4.94599
chr17	70990100	70991249	4.94592
chr4	154370400	154371899	4.94585
chr12	69184200	69184999	4.94542
chr7	30094800	30095949	4.94502
chr1	152766600	152767349	4.94456
chr4	151995050	151996249	4.94398
chr16	31663200	31664849	4.94363
chr6	39205200	39206799	4.9426
chr3	116661550	116662649	4.94093
chr11	51688800	51689699	4.93965
chr16	91647800	91648949	4.93876
chr6	30543900	30550199	4.93808
chr2	152226550	152227749	4.93762
chr3	69722000	69723049	4.93736
chrX	152015350	152017849	4.93719
chr11	83291200	83291549	4.93596
chr14	14012500	14013499	4.93562
chr9	108460400	108461399	4.93543
chr14	57745350	57746199	4.93539
chr12	69296200	69297849	4.9352
chr16	17890900	17891699	4.9347
chr5	74827100	74828149	4.93447
chr4	32799850	32801049	4.93396
chr5	137610250	137611999	4.93391
chr1	10993050	10994799	4.93338
chr10	99260700	99263049	4.9332
chr10	17722400	17724749	4.93274
chr6	51590600	51593199	4.93254
chr1	132007100	132008799	4.9323
chr12	100199050	100200849	4.93194
chr4	141010450	141011899	4.93079
chr3	62506350	62507449	4.93013
chr16	11202550	11203999	4.92804
chr2	104493250	104494549	4.92754
chr10	118867600	118870149	4.92737
chr12	57230400	57231049	4.92617
chr6	137735000	137735799	4.92537
chr4	154635200	154638399	4.92533
chr4	148558150	148559099	4.92532
chr19	47918700	47920249	4.92525
chr18	36560600	36561599	4.92457
chr7	101108200	101109749	4.9241
chr12	83950600	83951499	4.92374
chrX	20687900	20689449	4.92364
chr2	156840050	156841549	4.92358
chr11	119491300	119492199	4.92343
chr6	83136400	83138549	4.92343
chr12	33429550	33430349	4.92257
chr7	84151150	84152099	4.92243
chr4	135872600	135874499	4.92162
chr4	116463500	116464249	4.92099
chr1	139454750	139455599	4.92014
chr2	156391950	156393049	4.9198
chr14	56777250	56779049	4.91972
chr15	73089950	73091449	4.91948
chr4	132535500	132536299	4.91873
chr2	126875200	126876899	4.91729
chr10	111472550	111474399	4.91589
chr8	83608200	83609299	4.91516
chr9	20607150	20607999	4.91513
chr16	22161150	22163749	4.91455
chr10	99263250	99266499	4.91414
chr9	63756600	63759399	4.91411
chr8	71380900	71383399	4.91369
chr11	106500900	106502149	4.91367
chr3	27709800	27711349	4.91277
chr1	93753800	93755499	4.91267
chr12	111537400	111537949	4.91166
chr2	180024950	180026299	4.91129
chr5	75043700	75044949	4.91074
chr12	79172050	79172799	4.90956
chr9	105494400	105495849	4.90918
chr4	151170650	151171749	4.90901
chr15	55556650	55558049	4.90889
chr13	22035800	22037849	4.90876
chr12	87442350	87444099	4.90867
chr10	81176550	81177899	4.90841
chr4	143212150	143213149	4.9083
chr10	76442250	76442849	4.9076
chr17	33759800	33760449	4.90758
chr4	109475750	109476949	4.90752
chr1	38510750	38514199	4.90721
chr4	136148000	136148949	4.90705
chr17	87974950	87976099	4.90692
chr10	81495950	81496349	4.90638
chr19	53902400	53904199	4.906
chr17	35163650	35164899	4.90545
chr7	73616950	73619399	4.90528
chr12	20615050	20615899	4.90482
chr5	33651350	33653149	4.90425
chr6	24663650	24665049	4.90374
chr7	5020450	5021149	4.90366
chr7	44304250	44304999	4.90321
chr4	155085700	155086399	4.90253
chr14	21051800	21053299	4.90224
chr6	4902700	4904549	4.90182
chr1	36938050	36939999	4.90141
chr8	70282900	70283899	4.90112
chr7	28374900	28376749	4.90063
chr11	69579750	69582049	4.90058
chr17	84188050	84189099	4.90015
chr7	27590800	27592849	4.89987
chr4	148130800	148132199	4.89893
chr16	37867600	37869499	4.89848
chr6	49212450	49217199	4.89781
chrX	42150650	42152299	4.89647
chr12	81860000	81860949	4.8959
chr13	91460100	91460849	4.89577
chr16	42875800	42876949	4.89577
chr3	121814500	121815899	4.89572
chr13	23620600	23622599	4.89541
chr17	28176850	28177999	4.89471
chr6	48593600	48595049	4.89459
chr9	64340400	64341549	4.89394
chr12	20196550	20197649	4.89206
chr10	7792400	7792899	4.89201
chr6	17637000	17637949	4.89147
chr8	47287500	47289749	4.89132
chr1	43445400	43446849	4.89116
chr6	94282750	94283899	4.89028
chr12	16893550	16895849	4.89
chr1	185362450	185363699	4.88911
chr5	30154700	30155799	4.88881
chr3	5218000	5220849	4.8888
chr2	30834800	30837799	4.88842
chr14	76414750	76416149	4.88783
chr7	130546250	130547399	4.88725
chr7	142657800	142662549	4.8872
chr10	117223950	117224849	4.88645
chr15	88733200	88733999	4.8864
chr19	4396000	4398149	4.88609
chr15	89355700	89357049	4.88589
chr5	137530700	137533749	4.88562
chr9	96363250	96364449	4.88519
chr5	76303700	76305249	4.88476
chr18	58208750	58211549	4.88406
chr6	51196650	51198349	4.88399
chr11	6443750	6444449	4.88276
chr2	51146550	51149149	4.88253
chr11	85311250	85312149	4.88241
chr5	74067600	74068899	4.88211
chr6	85451550	85453149	4.8819
chr2	39004250	39005199	4.88177
chr12	21416500	21417599	4.88139
chr2	152830450	152831849	4.8799
chr5	137348400	137351849	4.87864
chr5	151368650	151369399	4.87852
chr1	159231650	159233399	4.8777
chr2	129198800	129199649	4.87749
chr1	136233500	136234799	4.87748
chr10	18055400	18056649	4.87707
chr1	86434550	86435149	4.87681
chr16	24392600	24394599	4.87666
chr12	28634750	28636399	4.87624
chr3	107332100	107333199	4.87611
chr18	65519700	65522199	4.87582
chr15	102670150	102671099	4.8758
chr4	107138900	107139949	4.87495
chrX	94724400	94725349	4.87444
chr7	79660200	79660999	4.87367
chr19	4614800	4615649	4.8721
chr8	123042500	123043499	4.8718
chr3	108209750	108210699	4.87062
chr3	65658450	65659749	4.86953
chr7	143437650	143438499	4.86908
chr11	120316300	120317049	4.86877
chr1	38626300	38629349	4.8681
chr15	77305800	77307249	4.86752
chr3	90212650	90213749	4.86741
chr14	49171700	49173249	4.86703
chr4	72201250	72202749	4.8667
chr3	96219000	96221499	4.86596
chr2	5950450	5952099	4.86577
chr9	21616150	21617249	4.86485
chr11	88688900	88691799	4.86478
chr2	121449300	121450299	4.86336
chr3	98013500	98014249	4.8633
chr8	120448250	120450049	4.86262
chr17	53688600	53689299	4.86246
chr16	11252950	11254399	4.86233
chr7	110060450	110061549	4.86174
chr9	58554500	58555549	4.86163
chr6	51179650	51181999	4.86149
chr11	117849250	117849949	4.86144
chr2	27677300	27678099	4.86069
chr1	171294150	171295199	4.85983
chr11	97279650	97280649	4.85898
chr19	36833100	36835499	4.85856
chr11	120573400	120574249	4.85746
chr7	109190600	109191549	4.85701
chr5	143112150	143113099	4.85649
chr2	157423850	157424949	4.85603
chr11	120184300	120189949	4.85596
chr2	4298950	4301199	4.85594
chr7	5060300	5063549	4.85569
chr8	69973650	69974299	4.85548
chr13	23760300	23762649	4.8553
chr13	53308650	53309849	4.85527
chr3	107695500	107696599	4.85448
chr13	90922850	90924399	4.85439
chr5	150522150	150523249	4.85402
chr13	63431350	63432149	4.85398
chr14	65261650	65262499	4.85379
chr2	74825500	74826399	4.85343
chr7	143069300	143070399	4.85305
chr3	154596600	154597499	4.85237
chr14	20545450	20546649	4.85203
chr6	124918900	124919749	4.85107
chr13	55209800	55213149	4.85053
chr3	55515300	55518399	4.85047
chr12	98258350	98259499	4.85018
chr6	52243350	52246999	4.84969
chr12	98746900	98747849	4.84864
chr13	3610250	3611149	4.84815
chr7	110018200	110019199	4.84809
chr3	27153100	27154649	4.84732
chr2	152413900	152415599	4.84708
chr15	99126000	99127549	4.84705
chr3	99253300	99257499	4.84655
chr9	107871950	107872899	4.84626
chr3	37312500	37313049	4.84616
chr3	53863250	53864149	4.84608
chrX	52911650	52913299	4.84557
chr2	52072100	52073699	4.84551
chr8	22859400	22860549	4.84528
chr3	79590950	79592549	4.84501
chr11	79253600	79254699	4.84406
chr15	80798500	80799699	4.84398
chr12	73111000	73113399	4.84273
chr15	73422200	73423149	4.84214
chr17	23771050	23771599	4.84206
chr3	19310050	19312149	4.84203
chr2	174463350	174464199	4.84197
chr11	116851600	116853049	4.84156
chr10	80053650	80054649	4.84129
chr4	138216550	138217049	4.84109
chr7	127448450	127449249	4.84034
chr5	130938800	130939749	4.83988
chr5	93267150	93268899	4.83967
chr7	81933350	81934799	4.83945
chr18	76335450	76337499	4.83937
chr1	162215700	162221449	4.83891
chr9	108648450	108649799	4.83871
chr5	122614000	122614799	4.83796
chr11	120549050	120550199	4.83706
chr14	59200550	59202499	4.8367
chr14	54652550	54653699	4.83649
chr15	89179850	89180749	4.83631
chr7	19003100	19004899	4.83585
chr8	110845650	110847499	4.8354
chr4	3874650	3875499	4.83467
chr11	102880350	102881349	4.8342
chr5	106963950	106965149	4.83336
chr4	55349950	55351249	4.83277
chr2	75421700	75426899	4.83152
chr18	6135200	6135999	4.83072
chr19	5487900	5491799	4.83038
chr16	4880700	4881499	4.83005
chr7	19748400	19749499	4.82951
chr11	85875150	85876549	4.82939
chr16	5049000	5050849	4.82921
chr5	123343850	123346499	4.82798
chr2	29889800	29890349	4.82787
chr16	97961800	97962699	4.82754
chr3	53462750	53464599	4.82704
chr3	30017000	30019399	4.82697
chr14	27038950	27040499	4.82637
chr14	115405250	115407699	4.8246
chr15	82353450	82354299	4.82403
chr10	24870000	24870449	4.82398
chr1	58712650	58713749	4.82376
chr2	71389200	71389949	4.82317
chr17	83938850	83939899	4.82278
chr2	109890300	109891649	4.82273
chr10	8885000	8887149	4.82257
chr8	57320950	57324399	4.82243
chr4	114986350	114987249	4.82216
chr14	56810800	56811749	4.82121
chr2	75208000	75211049	4.82081
chr11	85234000	85235449	4.82073
chr8	57510900	57511599	4.82058
chr9	21091300	21092099	4.82055
chr8	79638600	79640449	4.82028
chr17	57248550	57250049	4.82007
chr9	106159850	106160499	4.81997
chr6	51195400	51196449	4.81914
chr8	22593200	22594549	4.81905
chr1	71652400	71654299	4.81868
chr18	63691200	63692849	4.81804
chr12	8921050	8922949	4.81712
chr9	63377150	63378199	4.8167
chr11	58008900	58010349	4.81668
chr6	114919750	114922199	4.8164
chr11	55469650	55470599	4.81491
chr14	52019450	52020899	4.81484
chr7	45458800	45459749	4.81473
chr12	33965600	33967949	4.81417
chr6	52191050	52191799	4.81339
chr2	92389050	92389949	4.81315
chr6	126938950	126940049	4.81219
chr3	38483900	38484799	4.81206
chr17	28327900	28329749	4.81109
chr9	109875550	109877049	4.81087
chr12	29938000	29939499	4.81083
chr2	32318250	32319899	4.81069
chr7	16312000	16314649	4.81058
chr2	114654250	114655399	4.81018
chr10	80560900	80562399	4.81
chr7	128460550	128461799	4.80948
chr18	70568300	70569299	4.80948
chr10	80167750	80168999	4.80946
chr3	52101500	52103449	4.80937
chr11	98148950	98150399	4.8091
chr3	87945100	87950099	4.809
chr15	10713500	10715249	4.80885
chr4	6364950	6366249	4.80879
chr18	24019850	24022149	4.80807
chr1	39576300	39577399	4.80796
chr1	119047500	119049149	4.80745
chr1	134361150	134362599	4.80739
chr7	99182700	99183149	4.8072
chr12	71014750	71015699	4.80696
chr1	180851100	180851849	4.80634
chr5	151650500	151651299	4.80582
chr14	20673650	20675099	4.80525
chr14	45529200	45531249	4.80485
chr15	50663650	50664849	4.80484
chr3	49927850	49929849	4.804
chr8	124862350	124863749	4.80386
chr11	108923100	108924099	4.80366
chr15	25411500	25414499	4.80337
chr11	61483800	61486149	4.80332
chr11	78511650	78512999	4.80313
chrX	94797600	94798449	4.80277
chr2	151038650	151039399	4.80258
chr6	71493700	71494999	4.80246
chr3	89997600	89999999	4.80231
chr15	31600650	31602849	4.8021
chr3	95314800	95316099	4.80208
chrX	12005800	12007849	4.80164
chr2	151979600	151980349	4.80066
chr19	46056500	46057199	4.80048
chr17	78417600	78418149	4.80043
chr19	41847550	41848499	4.80014
chr3	95855200	95855899	4.80009
chr7	46795650	46796649	4.80006
chr8	69790750	69792149	4.79964
chr1	75505300	75506799	4.79944
chr2	26932550	26933749	4.79939
chr19	21651950	21652699	4.79885
chr4	124850050	124851549	4.79878
chrX	151803200	151804499	4.79843
chr2	33715850	33720249	4.79835
chr8	11008100	11009849	4.79802
chr8	26265200	26266699	4.7978
chr9	71894000	71897249	4.79767
chr18	82691900	82693549	4.79759
chr11	45851850	45852749	4.79703
chr12	102877450	102878549	4.79685
chr2	161108150	161109099	4.79629
chr3	69126050	69127099	4.79551
chr7	45123300	45124449	4.7954
chr11	98682300	98683349	4.79518
chr1	170214850	170215499	4.79507
chr4	150237200	150239449	4.79407
chr4	9668050	9669099	4.79385
chr6	47811950	47813299	4.79291
chr11	69072800	69073549	4.79237
chr17	53478500	53480149	4.79235
chr9	11898700	11899549	4.79218
chr7	70348100	70349849	4.79206
chr2	37422100	37423149	4.79139
chr1	93477650	93480149	4.79106
chr7	119720200	119720799	4.79046
chr2	94156850	94157999	4.7904
chr8	4275400	4276249	4.78997
chr3	35931900	35933549	4.78939
chr11	97781100	97782399	4.78903
chr7	25248250	25251799	4.78897
chr3	116423000	116425099	4.78864
chr6	18848550	18849299	4.78734
chr17	51178300	51179749	4.78578
chr4	100776250	100778249	4.78537
chrX	101639350	101641499	4.78507
chr9	122922750	122923699	4.78503
chr5	33273900	33275149	4.78495
chr7	45051500	45053349	4.78435
chr11	98400200	98400699	4.7843
chr14	79480400	79481649	4.78415
chr18	35118450	35119799	4.7839
chr2	119675100	119675749	4.78343
chr2	49732300	49734499	4.78334
chr16	18811750	18812949	4.78317
chr8	126583800	126584999	4.78268
chr4	106838850	106841049	4.78235
chr19	15984100	15985049	4.78208
chr8	84654700	84657449	4.78115
chr14	54685700	54687599	4.78104
chr17	34898200	34899599	4.78069
chr2	77945500	77946399	4.77947
chr16	32078400	32079449	4.77927
chr10	11280450	11282649	4.77888
chr8	84104350	84104899	4.77867
chr7	19094150	19095549	4.77802
chr1	167283550	167285199	4.77766
chr14	32201000	32202649	4.77754
chr10	122911100	122914149	4.77739
chr14	70152950	70153849	4.77662
chr17	34981450	34982949	4.77645
chr6	71831300	71831799	4.77638
chr2	29619750	29620399	4.77594
chr7	28808500	28810549	4.7758
chr11	117265400	117267599	4.77559
chr2	37702350	37703349	4.77557
chr9	59035550	59037799	4.7753
chr14	54603100	54603449	4.77481
chr6	21949550	21950449	4.77455
chr2	130423800	130425249	4.77437
chr1	16103550	16105649	4.77435
chr10	42501350	42503049	4.77385
chr5	138085000	138086049	4.77381
chr1	138855950	138856849	4.77375
chr8	83698550	83700249	4.77353
chr8	120488550	120489799	4.77347
chr12	31350900	31351449	4.77245
chr5	143526650	143528699	4.77199
chr8	72219700	72220249	4.77191
chr11	113749300	113751799	4.77184
chr10	84576450	84577199	4.77159
chr9	106452350	106455749	4.77132
chr1	136017600	136018599	4.77122
chr10	108161150	108163549	4.77059
chr18	49755200	49755699	4.77058
chr1	163929800	163930449	4.77046
chr14	65097400	65098199	4.77035
[truncated: 26,897 more rows]

## Sheet: Shh_peaks
Chromosome	Start	End	log2FC_input
chr19	7038900	7040049	6.97145
chr11	49711750	49713499	6.93195
chr6	51468250	51472099	6.75075
chr7	3645200	3646199	6.71932
chr11	51605350	51607399	6.71096
chr5	124351800	124354999	6.66583
chr17	80061050	80062299	6.64656
chr19	29521700	29523349	6.62385
chr4	148625900	148627449	6.59054
chr14	52019550	52020999	6.51111
chr7	30956050	30958149	6.45258
chr2	168205600	168207449	6.42646
chr10	116580450	116582699	6.42163
chr5	135186850	135188449	6.40995
chr6	47453550	47455599	6.39389
chr11	120597350	120599149	6.3618
chr2	49450700	49452099	6.35717
chr4	106911500	106914149	6.34059
chr9	22070950	22071499	6.32661
chr9	87729200	87731199	6.31996
chr16	94569650	94571399	6.31951
chr8	22476350	22477599	6.27118
chr4	133751750	133754449	6.26441
chr11	88046850	88048799	6.25343
chr11	5097800	5100549	6.226
chr1	46852550	46853499	6.21976
chr2	164878750	164879849	6.2081
chr12	87147150	87148449	6.17709
chr13	111685800	111687699	6.16059
chr15	12117200	12119199	6.15232
chr6	120665750	120666299	6.14739
chr5	20950650	20951849	6.13639
chr1	182018850	182020799	6.133
chr8	105170500	105171899	6.13096
chr17	88064000	88066049	6.12148
chr10	29361250	29362099	6.11742
chr7	44868650	44870149	6.11256
chr7	128739600	128740549	6.10486
chr3	152209300	152211649	6.10187
chr8	74993600	74994499	6.09901
chr17	56673300	56674149	6.0847
chr15	100226950	100228799	6.0752
chr8	22593050	22594549	6.06393
chr17	46856000	46859199	6.06234
chr1	162739600	162740599	6.05257
chr5	9160600	9161749	6.04904
chr3	97609750	97610249	6.04473
chr1	87213900	87214849	6.0431
chr14	34501350	34502749	6.04116
chr4	120824600	120825849	6.0393
chr11	55469700	55470599	6.03925
chr17	23803000	23804349	6.03007
chr4	135271600	135272799	6.02891
chr9	100643550	100644949	6.01403
chr6	39205250	39206799	6.01026
chr11	120989900	120991349	6.00983
chr11	115534950	115536299	6.00815
chr15	36792550	36794849	5.99805
chr9	44603800	44606199	5.98945
chr10	128376450	128377899	5.98115
chr1	172148100	172149699	5.97694
chr11	101640850	101641799	5.97255
chr4	46451100	46453199	5.97063
chr4	155601250	155602449	5.96885
chr13	111488750	111489949	5.95651
chr19	5609700	5610649	5.95399
chr5	134313800	134314799	5.94599
chr2	144269900	144271349	5.94116
chr12	80109650	80112949	5.93413
chr18	7868400	7870349	5.93222
chr12	57230400	57230949	5.92378
chr9	120492250	120493699	5.92206
chr10	53379000	53379949	5.91581
chr2	152396550	152398249	5.91548
chr16	22161450	22163899	5.90982
chr13	98925400	98926849	5.90133
chr4	139192900	139193799	5.89945
chr2	135658550	135659949	5.8968
chr11	103131800	103132949	5.88865
chr6	133105150	133105899	5.8865
chr6	38551400	38552049	5.88489
chr11	102818050	102819699	5.87608
chr2	154791000	154792399	5.85447
chr5	28316450	28318099	5.84896
chr1	181210800	181212499	5.84499
chr2	164910350	164912349	5.84245
chr13	55692600	55694149	5.83991
chr3	69043850	69044749	5.83622
chr7	126501800	126503649	5.82905
chr9	40799300	40800799	5.82883
chr3	148986850	148991299	5.82866
chr1	30948750	30949699	5.82687
chr5	115488900	115490349	5.82043
chr17	48408250	48409749	5.81952
chr4	40721500	40723599	5.81377
chr5	149050900	149053049	5.8089
chr4	127021250	127023049	5.80549
chr11	108920350	108923249	5.8044
chr16	33056150	33057499	5.80064
chr1	163309050	163313599	5.79844
chr10	122984200	122987049	5.79228
chr15	51990700	51991799	5.7918
chr4	41134700	41136999	5.78964
chr14	31018300	31020299	5.78877
chr13	58127050	58130199	5.7861
chr11	53350300	53352349	5.78051
chr1	86524700	86526349	5.78005
chr9	52047600	52049399	5.7792
chr13	100650550	100652249	5.77701
chr7	125491050	125491999	5.77585
chr8	128685750	128686349	5.76996
chr6	72898450	72900799	5.76671
chr11	72607200	72608549	5.76553
chr10	128231550	128233349	5.76279
chr1	66817050	66817699	5.76082
chr6	71543850	71544749	5.75984
chr13	9763450	9765399	5.75824
chr11	106158950	106161699	5.75332
chr18	34776950	34778099	5.74863
chr1	80339500	80340799	5.73929
chr11	98201950	98203649	5.73809
chr17	45571750	45573299	5.73605
chr2	153240600	153241949	5.73558
chr2	103795900	103797949	5.73163
chr5	30888850	30889799	5.73111
chr1	138836000	138844449	5.73098
chr7	80992550	80994549	5.72957
chr6	39556850	39558549	5.72944
chr17	35241250	35243399	5.72883
chr11	94473050	94474399	5.72225
chr4	129513650	129515199	5.72091
chr6	67267000	67268349	5.72039
chr5	105876550	105877599	5.71925
chr12	52503900	52505249	5.71769
chr7	27591600	27592799	5.71358
chr7	111081400	111083049	5.7127
chr14	122982550	122983349	5.7097
chr15	8443350	8445399	5.70776
chr1	63112950	63115049	5.70611
chr6	65042350	65043799	5.70514
chr19	7267500	7268949	5.70404
chr13	77134650	77135899	5.70263
chr8	75108750	75110499	5.70068
chr1	180640300	180642149	5.69777
chr7	25753400	25755749	5.69697
chr3	30505750	30510399	5.69213
chr17	25272550	25274349	5.68802
chr5	124424650	124426449	5.68568
chr16	76372050	76373849	5.68398
chr17	34119600	34122849	5.68102
chr11	52396350	52397099	5.67917
chr3	135438300	135439999	5.67855
chr8	92827400	92828249	5.67729
chr8	108703850	108705449	5.67529
chr10	83543450	83544699	5.67397
chr13	55321400	55322549	5.66519
chr4	133671900	133673399	5.66413
chr11	65787800	65788349	5.66288
chr10	43578250	43579049	5.66226
chr1	92831300	92833099	5.65902
chr11	98026300	98027599	5.65876
chr5	150673750	150674799	5.65669
chr8	31111850	31113099	5.65574
chr4	83485600	83487149	5.6529
chr9	66591600	66593099	5.65175
chr8	22859150	22859849	5.65044
chr2	6322300	6323699	5.65012
chr10	4387050	4388549	5.64829
chr3	30792700	30794149	5.64669
chr17	29263300	29264449	5.64319
chr17	35163600	35164899	5.64298
chr11	53299450	53301399	5.64166
chr9	88481000	88482599	5.64113
chr13	103919550	103921849	5.64024
chr15	73089900	73090799	5.6391
chr10	91170150	91171599	5.63521
chr7	45127000	45128799	5.63495
chr15	102470350	102471799	5.63273
chr8	4324100	4325149	5.63271
chr2	170130000	170131099	5.63255
chr12	51828600	51830399	5.6312
chr14	21498750	21500399	5.63085
chr10	53596950	53598249	5.63024
chr11	106787150	106788499	5.61983
chr6	17637000	17637749	5.61937
chr11	4160350	4161249	5.61714
chr5	33018850	33019899	5.6171
chr1	34841800	34843799	5.61382
chr4	143212000	143213049	5.61351
chr13	17803550	17805949	5.61175
chr11	20248600	20249449	5.61053
chr6	86404200	86405699	5.61041
chr2	156179100	156180299	5.60693
chr17	83350950	83352249	5.60327
chr4	32615400	32616099	5.60048
chr3	90508700	90509549	5.59784
chr12	4917350	4918549	5.59696
chr5	115010700	115012449	5.59667
chr12	35047200	35048099	5.59627
chr13	107021250	107022349	5.59508
chr10	60814000	60814849	5.59438
chr7	19603850	19604599	5.59437
chr11	105181450	105182799	5.59178
chr18	65579950	65582999	5.58969
chr11	32642000	32643949	5.58921
chr4	132210950	132212099	5.58539
chr8	102782500	102785749	5.58416
chr14	115040900	115042749	5.58406
chr9	108516550	108518349	5.57913
chr10	79767150	79767499	5.57847
chr9	120127750	120128399	5.57631
chr12	3426950	3427699	5.57423
chr4	34881900	34883449	5.5728
chr2	166995500	166996299	5.57187
chr4	132260300	132262149	5.5717
chr7	27165850	27166799	5.57022
chr1	15805600	15806499	5.57001
chr17	30003950	30005899	5.56923
chr7	19094200	19095649	5.56817
chr10	115384950	115386199	5.56737
chr18	10617750	10618549	5.56506
chr19	6363850	6365099	5.5649
chr2	119476950	119478449	5.56279
chr4	26346050	26346849	5.56261
chr5	115327150	115328149	5.56208
chr12	8640750	8641749	5.56049
chr6	120666350	120667549	5.55948
chr17	32363750	32364549	5.55818
chr10	37135900	37137149	5.55133
chr17	56040400	56041049	5.54937
chr19	32757500	32758799	5.54721
chr1	163402950	163404049	5.5454
chr10	77621900	77622899	5.54493
chr5	137510100	137511399	5.54203
chr9	114562150	114564399	5.54057
chr10	7955150	7957149	5.53958
chr11	86357000	86358399	5.53925
chr9	72274950	72275949	5.53915
chr2	104493400	104494549	5.53608
chr13	100832600	100833449	5.53413
chr12	112673250	112674849	5.52915
chr11	104549650	104550599	5.52823
chr7	81933250	81934949	5.52655
chr8	116920900	116922249	5.52323
chr5	137350150	137351799	5.52162
chr18	34506250	34507499	5.52133
chr4	44167050	44167999	5.52081
chr17	24168400	24169799	5.52058
chr12	110695250	110696399	5.52056
chr7	127614450	127615949	5.5201
chr6	124917400	124917949	5.51829
chr11	69913800	69914549	5.51735
chr8	69716350	69716999	5.51568
chr8	110845750	110847449	5.51429
chr15	96286800	96289149	5.51247
chr7	105786700	105788299	5.51163
chr13	119428350	119430499	5.51157
chr10	117709850	117710749	5.51143
chr5	86804200	86805299	5.5111
chr2	75659150	75660499	5.50893
chr3	119781900	119783949	5.50604
chr9	106368600	106369999	5.50578
chr17	33684150	33685499	5.50058
chr14	62759650	62761199	5.49876
chr2	132577300	132578149	5.49662
chr2	170511150	170512099	5.49589
chr9	18292150	18293099	5.4953
chr3	95658200	95659849	5.49142
chr8	84104450	84104899	5.49011
chr7	127746400	127747299	5.48956
chr17	35089200	35089849	5.48647
chr16	4212850	4214049	5.48634
chr5	33819800	33821899	5.48597
chr9	110131950	110132799	5.48544
chr11	69368350	69369799	5.48451
chr7	35055850	35056649	5.48212
chr10	82762900	82764049	5.4814
chr8	85298850	85300399	5.48112
chr1	180812050	180813599	5.48063
chr16	31663250	31664749	5.48049
chr9	108306300	108307199	5.47928
chr11	99229550	99231449	5.47746
chr11	69995800	69997349	5.47482
chr11	90637450	90638949	5.46991
chr5	106695400	106697249	5.46956
chr13	58400700	58403599	5.4691
chr19	3767200	3769399	5.46837
chr4	141444350	141445399	5.46616
chr9	80066400	80068549	5.4651
chr8	121950600	121951599	5.46365
chr18	73572750	73574999	5.46314
chr10	95515050	95516049	5.46246
chr10	41450400	41450899	5.46227
chr10	81136200	81137149	5.4616
chr7	127776150	127778249	5.46067
chr3	79629050	79629799	5.46053
chr1	133609350	133610299	5.45992
chr6	88898050	88898749	5.45967
chr3	94837350	94838749	5.45887
chr8	13105750	13106349	5.45806
chr4	34550550	34551649	5.45779
chr11	79339550	79340599	5.45689
chr10	80675000	80676199	5.45663
chr1	160211950	160212849	5.45574
chr3	49756100	49757399	5.45563
chr12	72761250	72762249	5.45547
chr12	84996300	84997249	5.45402
chr7	112022850	112024349	5.45228
chr2	162930700	162932449	5.45004
chr1	10993250	10994249	5.44991
chr11	88067600	88069399	5.44959
chr5	100038050	100040649	5.4478
chr10	128058200	128060049	5.44759
chr11	49202400	49204499	5.44667
chr8	11009050	11009649	5.44527
chr1	133660400	133661749	5.44331
chr19	21272200	21273499	5.44289
chr6	38433850	38434999	5.44169
chr4	136310950	136312049	5.44093
chr1	86526750	86528949	5.44057
chr8	106892400	106893999	5.43844
chr6	136827300	136828199	5.43708
chr5	45669900	45670699	5.43303
chr2	160731000	160732449	5.43298
chr7	45052400	45053349	5.4328
chr9	107983600	107986499	5.43236
chr4	155490900	155493049	5.43096
chr17	69383000	69384349	5.43085
chr16	91043500	91045049	5.43025
chr7	97579700	97580999	5.42993
chr4	141546100	141547599	5.42991
chr5	147429700	147431699	5.42789
chr14	54894050	54895399	5.42709
chr14	11553500	11554749	5.42703
chr19	7340600	7341749	5.4261
chr15	35155150	35155749	5.42416
chr18	6490100	6491399	5.41994
chr11	117654750	117655649	5.41986
chr4	81442100	81443099	5.41878
chr11	21091250	21092449	5.4173
chr5	151368800	151369649	5.41722
chr12	85373900	85375399	5.41705
chr3	51415450	51416999	5.41611
chr15	64381550	64383349	5.41493
chr16	21204800	21205899	5.41476
chr10	62650500	62652049	5.4131
chr9	102625450	102627149	5.41197
chr8	127063550	127065349	5.40816
chr13	94284650	94285349	5.40728
chr3	55112050	55113149	5.40644
chr13	24800800	24802499	5.40398
chr10	111473200	111474399	5.40204
chr18	69345650	69346749	5.40057
chr15	81585350	81587149	5.40018
chr1	178335750	178337749	5.40008
chr9	58582350	58583099	5.3985
chr15	75908250	75909649	5.39543
chr10	8885350	8886449	5.3954
chr11	77982750	77984449	5.39527
chr9	72806600	72808399	5.39478
chr2	31572700	31573399	5.39241
chr18	14681750	14683499	5.39219
chr8	25016450	25016849	5.39122
chr5	136565750	136567649	5.39005
chr2	60209200	60210799	5.38882
chr17	74338650	74339649	5.38865
chr7	67371950	67373699	5.38731
chr5	138441500	138442299	5.38492
chr3	90051200	90052549	5.38434
chr17	32283250	32284749	5.38293
chr14	79480450	79481599	5.38227
chr12	31948700	31950299	5.38148
chr7	110018200	110019199	5.38058
chr11	102880450	102881249	5.37978
chr2	52741650	52742649	5.37925
chr2	110017750	110018549	5.37826
chr11	6415850	6416949	5.37759
chr19	55741200	55744699	5.37684
chr6	71908400	71909149	5.37533
chr15	31530100	31531749	5.37477
chr14	56885450	56886349	5.37439
chr17	28800600	28801649	5.37317
chr14	47648850	47650249	5.37241
chr12	51690900	51691949	5.37195
chr5	77265500	77266899	5.37185
chr15	97831000	97832249	5.36953
chr8	123041000	123042349	5.3694
chr8	27085200	27089949	5.36886
chr5	121710900	121713399	5.36422
chr7	135715400	135716499	5.36421
chr1	118389450	118390299	5.36265
chr12	87265700	87267599	5.3624
chr7	27487050	27488049	5.36138
chr2	152226500	152227649	5.36094
chrX	71556000	71557349	5.3581
chr8	46739900	46741549	5.35686
chr11	109650650	109652049	5.35618
chr17	27622050	27623849	5.35508
chr10	37137200	37139149	5.35492
chr13	46726550	46728049	5.35467
chr1	127774200	127774999	5.35389
chr7	133121000	133124449	5.35142
chr2	30066400	30068099	5.35101
chr2	31759900	31761799	5.35055
chr13	56134500	56136099	5.34944
chr5	143112250	143113049	5.34941
chr11	50210250	50210849	5.34869
chr5	142906850	142907549	5.34846
chr6	35539100	35539849	5.34825
chr6	134034700	134036699	5.34802
chr2	83723550	83725249	5.34603
chr17	26252550	26253949	5.34532
chr6	119478600	119480399	5.34466
chr13	118386550	118387299	5.34252
chr8	40510750	40512399	5.34236
chr2	14073450	14074849	5.34202
chr7	122066300	122068199	5.34062
chr4	155812100	155813599	5.3403
chr18	32067400	32068599	5.33913
chr5	90931150	90932249	5.33867
chr19	10524750	10526099	5.33824
chr5	115429200	115430999	5.33682
chr1	178405450	178406899	5.33585
chr12	102877450	102878499	5.33541
chr2	85037100	85038049	5.33355
chr9	71484700	71486099	5.33253
chr3	97297050	97298599	5.3325
chr2	116060850	116064399	5.33207
chr14	12284250	12284799	5.33052
chr3	51276300	51278049	5.33048
chr3	107594000	107596249	5.32918
chr10	117845050	117845999	5.32778
chr6	29735050	29736649	5.32752
chr11	50430550	50431149	5.32719
chr10	117147850	117148549	5.32275
chr9	88482800	88483549	5.32251
chr19	5425150	5425999	5.32134
chr14	54925300	54927399	5.32057
chr2	91930400	91933499	5.31767
chr9	72110650	72112399	5.31469
chr2	60124100	60126199	5.31363
chr9	110531550	110533549	5.31354
chr3	51224450	51225599	5.31098
chr11	87986600	87987499	5.30965
chr18	42511450	42512649	5.30917
chr1	78657900	78658799	5.30877
chr2	78868200	78870799	5.30768
chr19	12795650	12796149	5.30533
chr8	72547300	72548299	5.30446
chr7	34388500	34390349	5.30411
chr19	43753000	43753649	5.30398
chr17	34590900	34593749	5.30397
chr13	14063750	14064949	5.30344
chr5	119803000	119806149	5.30278
chr4	126753500	126754249	5.29863
chr10	43478300	43480299	5.29778
chr7	16993900	16994349	5.29773
chr5	34336350	34337549	5.29711
chr8	25720100	25720549	5.29676
chr3	89164750	89165449	5.29606
chr10	80115750	80116649	5.29588
chr5	65696650	65698849	5.29476
chrX	74328750	74329099	5.29274
chr10	75921050	75922149	5.29256
chr3	16183200	16184149	5.29146
chr2	34370300	34372799	5.29139
chr2	30832850	30833799	5.29126
chr10	84440250	84441849	5.29067
chr2	57123250	57124199	5.28942
chr4	126967150	126968299	5.28917
chr9	62811200	62811999	5.28853
chr2	72978400	72981399	5.28786
chr11	47378800	47380049	5.28658
chr4	25281250	25281849	5.28516
chr6	42349900	42351349	5.28203
chr7	127966550	127968699	5.28021
chr5	122501050	122502949	5.27947
chr8	107293400	107294499	5.27897
chr12	65036200	65036949	5.27861
chr11	96829300	96829999	5.27735
chr8	79028200	79030999	5.27733
chr15	89180800	89181449	5.27328
chr5	131536800	131538749	5.2729
chr11	85234100	85235499	5.27117
chr17	62879600	62883099	5.27113
chr3	152395200	152397399	5.27104
chr9	21546800	21547799	5.26991
chr9	75409000	75410099	5.26942
chr15	36609250	36609949	5.2683
chr17	17825750	17830349	5.26817
chr11	85139200	85139949	5.26722
chr5	65762700	65765099	5.26691
chr17	34031250	34033049	5.26645
chr4	136052350	136053349	5.26581
chr17	71183550	71184399	5.26571
chr18	60669200	60670549	5.26456
chr7	25077300	25077999	5.26272
chr7	122969850	122971049	5.26244
chr9	82974350	82976699	5.2622
chr10	61680250	61680849	5.26028
chr11	102295600	102297099	5.2574
chr6	17693800	17694899	5.25687
chr4	141722750	141723449	5.25428
chr4	76448900	76450749	5.25379
chr12	11265100	11267499	5.25327
chr2	155472800	155473899	5.25238
chr1	64532050	64534049	5.25207
chr7	99482650	99483599	5.25013
chr10	119238650	119241299	5.24982
chr14	121035500	121037399	5.24899
chr11	19923750	19926249	5.2483
chr5	130221900	130222849	5.24807
chr15	102256750	102258599	5.24645
chr4	153957200	153958049	5.24505
chr16	96126850	96127799	5.24433
chr5	125388900	125390499	5.24393
chr6	87849900	87851049	5.24209
chr2	69897250	69898149	5.24077
chr7	92740750	92741499	5.24058
chr1	55026300	55027799	5.2403
chr1	136415250	136415649	5.23805
chr14	65097400	65098149	5.23768
chr12	82169350	82170199	5.23759
chr10	81559500	81560349	5.23741
chr5	100428400	100429549	5.23479
chr5	123136050	123143749	5.23443
chr1	171287300	171287949	5.23204
chr13	54621750	54622449	5.23156
chr14	24244550	24246199	5.23118
chr17	28176550	28177749	5.23088
chr5	114773700	114775149	5.22914
chr12	33957750	33960249	5.22789
chr2	166905900	166906799	5.22752
chr8	85026850	85027699	5.22694
chr10	127063600	127064999	5.22644
chr6	49213500	49215549	5.2249
chr4	14864100	14865749	5.2228
chr15	77305450	77307099	5.22255
chr13	24761250	24761999	5.22121
chr8	71592200	71592799	5.2207
chr16	37867750	37869549	5.22035
chr10	53629400	53630049	5.21913
chr11	26209950	26211249	5.21849
chr16	18288450	18289299	5.21816
chr10	80755100	80755899	5.218
chr6	134566000	134567699	5.21781
chr11	113784550	113786999	5.21732
chr3	157534050	157535099	5.21658
chr6	30047100	30049399	5.21641
chr11	69920050	69921349	5.21514
chr12	101082500	101084349	5.21474
chr17	84957950	84958949	5.21386
chr9	107872000	107872899	5.21249
chr5	43672300	43672999	5.21235
chr9	107568750	107570099	5.21112
chr14	16364400	16366299	5.21096
chr3	158030850	158031749	5.21054
chr3	135422550	135423849	5.21046
chr17	29490800	29491649	5.20979
chr10	84532950	84534099	5.20926
chr4	99120200	99121199	5.20857
chr8	25017300	25017999	5.20796
chr15	80133050	80134149	5.20596
chr9	9238500	9239399	5.2058
chr10	122886950	122888099	5.20568
chr2	18027700	18029149	5.20558
chr9	62341400	62345049	5.2054
chr7	90130200	90131399	5.20477
chr5	102069000	102070649	5.20462
chr2	58566300	58567899	5.20274
chr10	25359850	25360649	5.20219
chr14	99045050	99046099	5.20207
chr1	59669850	59671599	5.20179
chr4	45342050	45343099	5.20035
chr4	116220300	116222699	5.20001
chr7	99858050	99858899	5.1998
chr17	26507450	26508549	5.19951
chr2	167421100	167422449	5.19905
chr6	72787550	72789549	5.1972
chr13	9093750	9094949	5.19706
chr5	99977100	99978999	5.1954
chr12	111574450	111575299	5.19513
chr6	140623500	140624749	5.19392
chr2	102450800	102451849	5.19186
chr2	163658350	163659399	5.1912
chr6	119388000	119388799	5.19111
chr18	60774250	60775899	5.18978
chr5	108065650	108066749	5.1882
chr11	52098700	52099849	5.1882
chr10	96617050	96618349	5.18743
chr5	138085000	138085849	5.18669
chr18	80150700	80151799	5.18567
chr1	156035250	156036749	5.18488
chr6	72438700	72440349	5.18376
chr12	99392250	99393399	5.18349
chr9	107980550	107983499	5.18315
chr18	61555250	61557149	5.18307
chr17	4993600	4997249	5.18288
chr14	21986250	21987799	5.18257
chr9	106885850	106887149	5.18153
chr7	36697100	36698849	5.18148
chr4	103119350	103120099	5.18111
chr2	112492450	112493299	5.18095
chr10	111009150	111010549	5.17929
chr2	121270550	121271449	5.17856
chr1	152901850	152903149	5.17609
chr2	166153550	166155799	5.17589
chr18	73702700	73703799	5.17423
chr6	35177250	35178199	5.17369
chr14	21830600	21832249	5.17361
chr8	126592350	126593549	5.17355
chr6	124755900	124757599	5.17254
chr18	33794850	33795849	5.17248
chr1	10037400	10038849	5.17131
chr8	119558050	119558849	5.16962
chr10	79854550	79855649	5.16959
chr4	109475750	109476749	5.16846
chr5	24841450	24842749	5.16828
chr8	111536100	111537599	5.16808
chr7	82867300	82868599	5.166
chr1	39899950	39902899	5.16587
chr9	59485500	59486749	5.16563
chr2	52424150	52424949	5.16505
chr7	16613800	16615149	5.16475
chr8	84845900	84846899	5.16246
chr14	47276600	47277499	5.16184
chr11	79253750	79254749	5.16172
chr2	157565600	157567049	5.16159
chr5	23432350	23433399	5.16104
chr9	31279550	31282199	5.15938
chr5	88675000	88676249	5.15842
chr5	88554450	88555199	5.15742
chr12	70825450	70826699	5.15737
chr17	56199800	56200249	5.15655
chr17	65782350	65784149	5.15622
chr13	35741400	35742399	5.15621
chr7	12922250	12922949	5.15545
chr10	111164850	111165899	5.15507
chr10	128695600	128696299	5.15452
chr4	152477700	152478249	5.15404
chr11	82781100	82781999	5.15377
chr5	52189550	52190599	5.15364
chr6	120037200	120038749	5.15348
chr7	110061700	110062699	5.15305
chr4	133010850	133012899	5.15247
chr5	69556650	69557499	5.15242
chr8	86744950	86746099	5.15238
chr5	20881450	20882099	5.15214
chr11	94320950	94322749	5.15144
chr17	71001400	71002999	5.15132
chr14	26638150	26639499	5.15027
chr12	85338750	85339549	5.14978
chr4	3874700	3875399	5.14943
chr17	47923750	47924799	5.14913
chr3	30010450	30013499	5.1485
chr11	102316850	102320299	5.14352
chr10	63022850	63024849	5.14333
chr6	31398750	31399549	5.14329
chr5	149184650	149185449	5.14184
chr1	128359000	128359699	5.13929
chr8	70527700	70528499	5.13905
chr17	87445850	87447399	5.1387
chr13	44730750	44731299	5.13838
chr17	34604300	34606649	5.13791
chr9	115308750	115310499	5.13767
chr2	92182700	92185699	5.13697
chr10	61782600	61784599	5.13606
chr6	146577550	146578549	5.13508
chr7	126199800	126200399	5.13478
chr2	84741600	84744749	5.13375
chr1	180813700	180814849	5.13329
chr5	74093100	74094099	5.13256
chr14	76152150	76152699	5.13202
chr19	6986900	6987949	5.13185
chr19	28011700	28012599	5.13112
chr4	132345000	132345699	5.13096
chr19	60789450	60790699	5.12838
chrX	42149400	42150449	5.12782
chr2	180041500	180043149	5.1264
chr8	57651600	57653399	5.12633
chr4	103113600	103114999	5.12587
chr1	137898600	137900249	5.12567
chr8	123477800	123478649	5.1244
chr7	121034550	121035849	5.12414
chr1	191574250	191575549	5.12162
chr18	77713150	77714499	5.12089
chr7	116031350	116032699	5.12088
chr19	10183000	10183899	5.12054
chr12	44209150	44210099	5.1201
chr9	65140450	65142349	5.11936
chr2	91265250	91265949	5.11826
chr3	69316050	69316799	5.11693
chr4	140701450	140703849	5.11617
chr7	13022850	13025349	5.11613
chr5	96160650	96163399	5.11513
chr3	90293200	90294299	5.11478
chr11	5541550	5542299	5.11328
chr7	6154850	6156199	5.11311
chr2	18056850	18058449	5.11266
chr10	80226650	80227299	5.11251
chr5	44100100	44101849	5.11234
chr2	174329650	174331649	5.11129
chr17	5840600	5841949	5.11111
chr4	109676550	109677249	5.11085
chr12	111537400	111537949	5.11039
chr7	16400100	16402999	5.11032
chr7	44816300	44817349	5.10979
chr6	113306600	113307999	5.10969
chr19	5802700	5803649	5.10934
chr13	91807150	91808049	5.10821
chr11	50827200	50827999	5.10815
chr12	8771400	8773399	5.1078
chr10	69212450	69213999	5.10767
chr2	126674100	126676449	5.10697
chr7	28179400	28180749	5.10629
chr5	30154250	30155249	5.10543
chr5	73491150	73492299	5.10501
chr11	51263100	51263899	5.10486
chr13	43479900	43481799	5.10424
chr19	12794550	12795499	5.10357
chr9	110742600	110744049	5.10356
chr8	109737200	109737799	5.10355
chr8	88361350	88362349	5.1031
chr4	109280300	109280749	5.10297
chr14	76413950	76416099	5.10288
chr3	65957150	65958249	5.10234
chr6	53819100	53820799	5.10092
chr3	34019250	34021099	5.10088
chr13	103773200	103775049	5.10084
chr17	4626000	4626799	5.09944
chr11	115513600	115514349	5.09909
chr2	4880950	4883149	5.09815
chr17	10317600	10320549	5.098
chr9	25251600	25253549	5.09798
chr7	45123400	45124399	5.09734
chr3	142880900	142882549	5.09576
chr17	69156600	69157699	5.09536
chr7	100931150	100932249	5.09505
chr10	79852500	79854249	5.09499
chr3	30418350	30420299	5.09483
chr7	83883200	83884999	5.09445
chr3	122618550	122620299	5.0939
chr10	59879550	59880499	5.09368
chr12	53252200	53253549	5.09366
chr5	43781400	43782899	5.09337
chr9	78480400	78481649	5.09265
chr5	3647050	3648049	5.0926
chr16	17200550	17201549	5.09225
chr10	41518750	41520349	5.09087
chr4	136601500	136602849	5.09003
chr4	106910350	106911299	5.08999
chr19	57609700	57611499	5.08981
chr12	36381550	36382249	5.08964
chr1	175880450	175881349	5.08927
chr1	138856200	138856799	5.08882
chr6	85960800	85961649	5.08882
chr12	102705050	102705499	5.08877
chr7	99351450	99353849	5.08791
chr13	9276500	9277349	5.08705
chr11	101657950	101658349	5.08674
chr15	25411650	25414449	5.08672
chr19	28010150	28011599	5.08641
chr13	111807750	111809099	5.08555
chr7	132859200	132859649	5.08549
chr5	75043700	75044799	5.08472
chr4	149737350	149738049	5.08409
chr6	48541850	48543299	5.08301
chr11	116030200	116031549	5.08184
chr1	74391600	74392749	5.08079
chr7	80370800	80371699	5.08035
chr15	99771750	99772449	5.08032
chr11	74723150	74724999	5.08031
chr4	154011250	154012499	5.08019
chr2	30472350	30473549	5.07995
chr11	104440550	104442399	5.07965
chr13	54686200	54687749	5.07941
chr2	167062200	167064249	5.07909
chr18	35771450	35772749	5.07826
chr18	31910750	31911349	5.07646
chr15	101077400	101078549	5.07639
chr8	26119350	26120149	5.07582
chr4	126201700	126202699	5.07559
chr11	31870400	31870749	5.07442
chr6	56796600	56798299	5.07287
chr15	73183600	73185449	5.07269
chr9	57076350	57077199	5.0715
chr9	119402150	119403649	5.07147
chr11	60536350	60537949	5.07074
chr2	129800200	129801999	5.06996
chr12	55302700	55303549	5.06972
chr17	57030600	57031549	5.06942
chr14	50930400	50930849	5.06865
chr8	105635800	105637999	5.06839
chr3	103058250	103059149	5.06808
chr4	126046900	126047499	5.06771
chr1	134560150	134561849	5.06771
chr10	63338350	63339449	5.06766
chr5	122371650	122372249	5.0664
chr15	102202900	102204599	5.06505
chr1	156718150	156719049	5.06416
chr18	13969500	13972699	5.06348
chr17	27554450	27558399	5.06284
chr9	44334700	44336149	5.06269
chr5	122158300	122159349	5.06171
chr3	90265150	90266249	5.06166
chr5	134183750	134184549	5.06163
chr10	118867950	118869199	5.0609
chr2	152830350	152831299	5.0598
chr19	56547900	56549249	5.05971
chr13	51100800	51101849	5.05814
chr4	33247900	33248499	5.05808
chr9	108490650	108491499	5.05783
chr2	163995150	163995899	5.05778
chr9	61372350	61374749	5.05749
chr9	41937300	41939049	5.05666
chr6	42265050	42266299	5.05641
chr1	171410950	171411949	5.05268
chr9	8003150	8004599	5.05221
chr6	18848600	18849649	5.05196
chr6	21985950	21987399	5.05145
chr3	22076400	22077749	5.05114
chr4	133584000	133584649	5.04884
chr14	87415900	87417799	5.04854
chr7	16815800	16817299	5.04722
chr2	125858350	125859099	5.04669
chr18	22343400	22345049	5.046
chr16	84834150	84836199	5.04499
chr8	72134750	72136799	5.04426
chr12	108792950	108794899	5.04301
chr17	36270900	36272099	5.043
chr15	103303350	103305249	5.04176
chr1	59762300	59764899	5.04022
chr15	3979050	3979749	5.04017
chr3	107332050	107333099	5.0398
chr3	30512650	30515149	5.0396
chr10	80149650	80152549	5.03927
chr3	41741850	41742549	5.03894
chr15	50888000	50890849	5.03869
chr8	11635150	11635799	5.03869
chr2	59611350	59613749	5.0381
chr5	65390450	65391399	5.03766
chr10	7680500	7682049	5.03726
chr15	99702100	99702549	5.03559
chr2	29619800	29620499	5.03532
chr11	102184600	102185299	5.03493
chr8	104442000	104443149	5.03475
chr17	3114200	3116049	5.03455
chr6	83455550	83457349	5.03303
chr3	19309750	19312149	5.03259
chr4	133812750	133815349	5.03217
chr3	135690700	135692199	5.03162
chr17	65612350	65614399	5.02952
chr1	182340750	182341649	5.0295
chr7	90129300	90130099	5.02767
chr7	82866400	82867099	5.02762
chr1	13372500	13374749	5.02737
chr1	84838200	84840549	5.02667
chr3	96104100	96105199	5.02569
chr2	174857550	174859699	5.02538
chr4	134922650	134923449	5.02503
chr8	84066800	84067249	5.02142
chr19	7205350	7206999	5.0195
chr9	101073950	101075549	5.01836
chr3	14578600	14579599	5.01762
chr11	77606800	77608299	5.01718
chr3	107695550	107696599	5.01706
chr16	48993350	48994099	5.01665
chr11	59227000	59228349	5.01654
chr8	79639350	79640499	5.01648
chrX	159255800	159257049	5.01479
chr8	8689400	8690549	5.01456
chr2	167503400	167504099	5.01415
chr18	23954000	23955499	5.01321
chr8	70352200	70353249	5.01277
chr11	95384550	95385449	5.01258
chr18	67723800	67724649	5.01181
chr19	45782450	45783599	5.01157
chr19	7382150	7383499	5.01138
chr11	19013300	19017599	5.01036
chr9	21616200	21617149	5.01019
chr10	62791300	62792299	5.01013
chr14	76504600	76505849	5.00866
chr9	56160150	56161199	5.00793
chr3	136670150	136671849	5.00791
chr6	86523900	86527749	5.00751
chr10	82860100	82861399	5.00744
chr10	117063200	117063849	5.00694
chr15	76656100	76656999	5.00596
chr11	35121100	35121649	5.00595
chr11	77686150	77688049	5.00462
chr14	26579450	26580449	5.00455
chr4	62965100	62966199	5.00365
chr7	99979450	99980449	5.00308
chrX	20688450	20689099	5.00273
chr2	35661350	35661999	5.00273
chr6	145249200	145250249	5.00196
chr7	127478150	127479849	5.00161
chr10	39731550	39733449	5.00106
chr9	15306150	15307099	5.00009
chr13	54694250	54694999	4.99991
chr6	83914300	83915199	4.99904
chr11	83473050	83474049	4.99827
chr10	17947050	17948099	4.99714
chr4	133967400	133967999	4.99676
chr6	122485850	122487149	4.99593
chr10	126978600	126980299	4.99539
chr7	128237250	128238399	4.9948
chr16	52031600	52032799	4.99383
chr13	48869600	48871699	4.99374
chr1	38129050	38129749	4.99339
chr15	36607950	36608999	4.99331
chr14	56668250	56669049	4.99205
chr14	56811950	56813399	4.99173
chr11	120580700	120582399	4.99128
chr12	54984850	54986399	4.99097
chr3	87906250	87907899	4.99044
chr1	191717550	191719249	4.99029
chr1	86440900	86443599	4.9901
chr16	33380150	33381849	4.98949
chr3	94953650	94954949	4.98842
chr18	58208800	58211399	4.98664
chr9	59035550	59037599	4.98601
chr18	3336550	3337699	4.98601
chr4	139351850	139352949	4.98531
chr13	108043650	108044349	4.98403
chr11	115603350	115604699	4.98352
chr12	83632200	83633299	4.98345
chr14	101653650	101654599	4.9834
chr4	123411000	123412749	4.98178
chr3	104637900	104639549	4.98145
chr13	45469850	45470299	4.98138
chr12	70826750	70827949	4.98069
chr2	114654150	114655299	4.98024
chr5	23433450	23436099	4.97953
chr12	69371400	69373199	4.97856
chr11	52231350	52232949	4.97848
chr8	11554800	11555849	4.97823
chr9	72662350	72664049	4.97757
chr17	63498850	63500749	4.97727
chr10	82629800	82630599	4.97708
chr1	162217700	162222249	4.97705
chr1	138845500	138847949	4.97638
chr19	7416800	7418749	4.97593
chr3	87173600	87174699	4.97569
chr4	6453700	6454249	4.97548
chr5	25497850	25498849	4.97544
chr8	122567950	122568649	4.97481
chr13	48546000	48546599	4.97449
chr5	67260650	67261499	4.97373
chr1	177257400	177259199	4.97365
chr7	73556600	73558499	4.97164
chr2	153345700	153347149	4.97154
chr6	134926800	134928599	4.97119
chr7	4811650	4812799	4.97113
chr10	128458600	128460099	4.97104
chr5	129020150	129021599	4.97103
chr7	113513750	113514599	4.96994
chr8	79398300	79399499	4.96956
chr9	41579800	41583649	4.96909
chr18	15149950	15151399	4.96879
chr4	150236100	150237049	4.96849
chr1	36368450	36369199	4.96797
chr16	23988500	23989299	4.96796
chr14	122464250	122465299	4.96768
chr19	37207500	37208449	4.96757
chr7	84689250	84689949	4.96746
chr16	20672750	20674049	4.96742
chr12	69356650	69357149	4.96737
chr14	47297750	47299549	4.96657
chr5	44226050	44227549	4.96582
chr13	55361750	55362899	4.96519
chr12	104751200	104752049	4.96458
chr1	179802650	179803749	4.96342
chr2	73910600	73911899	4.96296
chr16	90283100	90284499	4.96279
chr9	21367900	21368849	4.96277
chr5	32610450	32612099	4.96267
chr4	48584450	48586799	4.96252
chr5	21054800	21056099	4.96236
chr6	71493850	71495099	4.96227
chr1	131910400	131911499	4.96141
chr9	42471800	42472349	4.96076
chr1	132006900	132008799	4.95934
chr19	53389750	53390649	4.9592
chr12	52097600	52098049	4.95869
chr7	30587750	30588849	4.95798
chr18	42275400	42276149	4.95798
chr4	116075150	116076799	4.95769
chr3	97901250	97901699	4.95746
chr17	17489750	17491099	4.95629
chr7	45215400	45217399	4.95588
chr5	93092800	93094949	4.95566
chr11	51999450	52000799	4.95563
chr5	121848900	121849549	4.95429
chr9	25150950	25151999	4.95407
chr2	93045700	93046599	4.95327
chr8	47713100	47713899	4.95254
chr4	21847450	21848499	4.95179
chr1	36243750	36244249	4.95056
chr9	79759250	79760149	4.95051
chr6	4600500	4602149	4.94991
chr5	25222850	25223249	4.94974
chr2	138256500	138257349	4.94967
chr15	101174050	101174649	4.9496
chr12	91588450	91590049	4.94946
chr7	48881200	48881749	4.94923
chr12	101975100	101976799	4.94914
chr11	60699700	60700449	4.94886
chr18	11657000	11658199	4.94867
chr15	55071700	55072499	4.94856
chr18	9957650	9958699	4.9484
chr2	117120650	117122349	4.948
chr8	13907850	13908299	4.94721
chr4	132421550	132422549	4.94689
chr15	37135450	37136099	4.94634
chr1	6214200	6215399	4.94403
chr3	88685700	88686749	4.94273
chr5	143526950	143528699	4.94211
chr10	40349300	40350149	4.94159
chr11	59449750	59450549	4.94119
chr5	31526400	31527499	4.94094
chr13	104178800	104179149	4.94081
chr3	65974050	65974849	4.9402
chr5	50058100	50059099	4.93944
chr7	49778350	49778799	4.93899
chr8	70699000	70700649	4.93813
chr4	42999450	43000499	4.9375
chr1	91250350	91251049	4.937
chr8	123065400	123066149	4.93694
chr4	135856050	135857349	4.93654
chr9	64340400	64341499	4.93447
chr3	95929200	95930899	4.93446
chr2	93642600	93644249	4.93403
chr6	50110200	50110949	4.93321
chr9	36725800	36726699	4.93299
chr6	87980700	87982199	4.93254
chr14	54430650	54432899	4.93241
chr10	18234550	18235349	4.93027
chr16	31274500	31275199	4.93017
chr11	19017650	19020399	4.93
chr8	80738200	80739399	4.92988
chr6	113075800	113078749	4.92935
chr10	62792400	62793099	4.92892
chr5	53589950	53591849	4.92844
chr2	53191350	53193049	4.92761
chr4	135872650	135873949	4.9275
chr3	100685000	100686349	4.9258
chr11	118247800	118248499	4.92576
chr8	85035800	85038399	4.92562
chr12	55491750	55492649	4.92548
chr19	23687000	23688099	4.92547
chr10	128411700	128412499	4.92439
chr10	84576600	84577099	4.92439
chr1	36938650	36940249	4.92439
chr8	22192750	22193499	4.9231
chr16	94568600	94569199	4.92302
chr2	153741250	153742199	4.92232
chr9	57764250	57766299	4.92214
chr18	10181400	10182099	4.92156
chr3	31093600	31096299	4.92147
chr14	57664350	57665649	4.91808
chr7	25247850	25250749	4.91801
chr3	95894000	95894549	4.91766
chr11	60104800	60107049	4.91762
chr14	61647350	61648849	4.91738
chr8	8659400	8661899	4.9173
chr5	113993000	113993899	4.91701
chr8	83996150	83998049	4.91664
chr10	36974100	36975699	4.91654
chr16	22264550	22265999	4.91653
chr2	106693200	106695299	4.91463
chr4	135986700	135987249	4.91382
chr3	138527250	138528399	4.91372
chr5	124540700	124541749	4.9137
chr11	50291100	50292399	4.91322
chr13	98890200	98891199	4.91314
chr7	120677600	120678299	4.91314
chr11	88099200	88099999	4.91289
chr15	38298700	38300599	4.91285
chr5	146832800	146833949	4.91263
chr14	65261450	65262499	4.91263
chr5	140418050	140420099	4.91232
chr5	118559550	118560199	4.91144
chr8	34805400	34807199	4.91123
chr11	103697250	103698399	4.91029
chr5	121204500	121205399	4.91005
chr12	73110950	73113299	4.90981
chr1	51915200	51916149	4.9098
chr8	120100950	120101949	4.90964
chr1	159231850	159233099	4.90846
chr15	83148200	83149749	4.90831
chr19	29805500	29806599	4.90799
chr5	21701500	21701999	4.90733
chr10	81137600	81138849	4.90702
chr9	69989450	69990199	4.90697
chr14	25459150	25461449	4.90693
chr14	51063450	51063849	4.90671
chrX	162760400	162761599	4.90664
chr4	131872550	131874899	4.90664
chr5	3543750	3544349	4.9066
chr1	133131250	133132499	4.90591
chr14	52103250	52104049	4.90506
chr3	146520850	146521549	4.90348
chr13	43931000	43931549	4.90328
chr11	103115000	103115999	4.90313
chr17	24251650	24252049	4.90266
chr4	137356600	137357699	4.90255
chr7	34652500	34655799	4.90177
chr3	69126050	69127099	4.9016
chr15	103215450	103216299	4.90074
chr5	107868250	107869049	4.89981
chr12	69183550	69184099	4.89969
chr3	5218600	5220249	4.89949
chr16	23224750	23225449	4.89937
chr4	136140600	136141649	4.89909
chr6	4902750	4904049	4.89747
chr6	92091350	92092349	4.89662
chr10	20311400	20313599	4.89572
chr14	20640500	20641549	4.89488
chr2	91526750	91527649	4.89475
chr15	96459600	96460999	4.89466
chr17	47628800	47630449	4.89442
chr1	192137500	192138749	4.89418
chr7	141228400	141229449	4.89347
chr9	59288900	59289949	4.89318
chr9	118040450	118041399	4.89237
chr12	8499250	8499949	4.89232
chr11	113749200	113751799	4.89217
chr6	47593950	47595899	4.89212
chr19	46038600	46040249	4.89154
chr18	61176450	61176999	4.89153
chr10	59220800	59221899	4.89116
chr6	48593900	48594999	4.8909
chr6	21949600	21949999	4.8907
chr3	95817800	95819349	4.88919
chr10	98913750	98915899	4.88908
chr4	130662900	130664549	4.88901
chr12	71016050	71017249	4.88884
chr11	97187300	97187999	4.88869
chrX	170009200	170009899	4.88798
chr3	103020500	103021999	4.88672
chr14	27428750	27429799	4.88659
chr17	80205850	80207299	4.88638
chr10	99263400	99265649	4.88626
chr1	179457100	179457999	4.88569
chr13	41000950	41001699	4.88453
chr11	97699850	97700999	4.88243
chr5	45520250	45520899	4.88206
chr17	51178400	51179699	4.88174
chr5	64803300	64804699	4.88149
chr13	28950750	28953599	4.88105
chr15	63997300	63998149	4.88035
chr11	60417450	60418149	4.88024
chr4	132308650	132309499	4.87998
chr2	160646000	160647399	4.87927
chr5	45856800	45857849	4.87915
chr19	5490400	5491699	4.87912
chr11	69671250	69672299	4.87904
chr4	82504850	82507849	4.87884
chr6	52226300	52228149	4.87872
chr10	80179200	80180849	4.87836
chr6	134791800	134792699	4.8782
chr13	47104950	47106949	4.87809
chr10	94688050	94689249	4.87798
chr12	117843450	117844149	4.87512
chr14	70519200	70520749	4.87481
chr1	192796850	192797399	4.87426
chr13	56703000	56704149	4.87423
chr8	87957850	87960749	4.87411
chr10	58446800	58447549	4.87273
chr10	60002200	60003849	4.87256
chr10	120473950	120476699	4.87185
chr1	91397950	91398849	4.87177
chr5	142906000	142906749	4.87074
chr17	50509000	50510099	4.87071
chr14	75844450	75846399	4.86918
chr6	43665600	43666199	4.86843
chr2	128686650	128687599	4.86833
chr14	28505750	28507349	4.86817
chr4	139130100	139131149	4.86783
chr6	87913750	87914799	4.86722
chr16	8830050	8831349	4.86647
chr9	64960850	64961649	4.86618
chr19	10203450	10204499	4.86564
chr15	84923400	84924099	4.86545
chr6	51171750	51172949	4.86542
chr14	31205350	31206699	4.86527
chr15	28024400	28025949	4.86524
chr12	27337800	27342749	4.86522
chr4	123663700	123665799	4.86418
chr16	87494950	87495949	4.86396
chrX	18162600	18164049	4.86272
chr3	66978450	66982349	4.86243
chr7	90442350	90444049	4.86219
chr2	152413850	152414849	4.86194
chr11	98794250	98796749	4.86194
chr4	135352350	135353249	4.86119
chr3	88553150	88554399	4.86053
chr13	75942750	75944799	4.86043
chr4	138217150	138218149	4.86013
chr7	78782800	78783699	4.86013
chr15	82898950	82899849	4.86001
chr14	49065650	49066999	4.85977
chr11	21238350	21239849	4.85916
chr11	62602900	62603999	4.85904
chr18	77564800	77565499	4.85836
chr11	69632800	69633749	4.85823
chr11	69414550	69417449	4.85797
chr1	176813150	176814149	4.85754
chr6	115675300	115676549	4.85716
chr11	58008850	58010049	4.85623
chr1	171328450	171330299	4.85597
chr14	31435150	31436049	4.85559
chr8	25602150	25603149	4.85492
chr12	69158450	69159549	4.85315
chr8	70872950	70873949	4.85184
chr11	50377700	50378749	4.85181
chr9	31211050	31211799	4.85154
chr8	71380900	71381999	4.85119
chr11	23255950	23257849	4.85083
chr14	54686050	54686849	4.85032
chr3	65528400	65529149	4.85011
chr2	84840250	84841049	4.8493
chr7	24884050	24885399	4.84903
chr12	40037500	40037949	4.84834
chr15	100615450	100616799	4.84734
chr11	116489550	116490999	4.84727
chr11	75732900	75734099	4.84695
chr19	23273250	23273899	4.84562
chr6	67036750	67037299	4.84511
chr17	84465700	84466199	4.84494
chr8	95331000	95332299	4.84491
chr17	74489500	74490249	4.84406
chr9	32543550	32544049	4.84398
chr18	44661450	44662299	4.84351
chr15	82353450	82354299	4.84331
chr12	78861750	78862699	4.84265
chr2	128966500	128968399	4.84244
chr8	109565050	109565749	4.84232
chr11	43681950	43682949	4.84179
chr16	78576150	78576949	4.84156
chr11	116023750	116024499	4.84043
chr16	10835000	10835449	4.84003
chr17	34024350	34025199	4.8395
chr3	9250500	9252099	4.83942
chr15	85336300	85337049	4.83908
chr1	63730650	63731049	4.83863
chr9	21238000	21239299	4.83841
chr7	112427700	112428599	4.83794
chr9	64172250	64174249	4.83788
chr1	139422250	139423099	4.83785
chr7	24507000	24508149	4.83773
chr6	13677100	13677999	4.83757
chr2	150909450	150909849	4.83643
chr5	149678200	149678899	4.83629
chr11	60878000	60878899	4.83523
chr4	149425400	149426649	4.83505
chr4	98923600	98924749	4.8347
chr2	94157200	94157899	4.83453
chr7	101933450	101933849	4.83447
chr16	22438750	22439649	4.83435
chr10	112928100	112929099	4.83377
chr6	85451500	85453049	4.83377
chr12	80434800	80435849	4.83253
chr7	127707850	127709249	4.83203
chr5	33335500	33336399	4.83129
chr10	128035650	128036899	4.8312
chr16	77013750	77014199	4.83087
chr3	88177700	88178299	4.83044
chr17	45685750	45686249	4.82993
chr1	168429550	168431999	4.82937
chr7	3617350	3617799	4.82913
chr2	73891800	73892599	4.82908
chr2	134643550	134644149	4.82807
chr19	45058550	45059399	4.82783
chr16	44138550	44140699	4.82647
chr12	110696600	110696999	4.82639
chr6	57702400	57703349	4.82625
chr5	25499000	25499849	4.82592
chr13	21778900	21780349	4.82558
chr16	64852000	64853099	4.82429
chr15	89075350	89075949	4.82369
chr12	80228800	80231649	4.82369
chr13	23745700	23746549	4.82365
chr2	32150600	32151999	4.82325
chr17	83214450	83216699	4.82311
chr6	121110100	121110449	4.82302
chr11	59839350	59840249	4.82294
chr12	52603150	52603799	4.82169
chr5	72167600	72168149	4.8201
chr2	90745550	90746399	4.81977
chr11	120185800	120186349	4.8193
chr2	60962200	60963849	4.81891
chr18	53862150	53863099	4.81865
chr19	44135550	44135949	4.81838
chr11	120348650	120350549	4.81705
chr13	80882550	80883299	4.81678
chr6	83121750	83122599	4.81654
chr2	85036550	85037049	4.81639
chr2	114200950	114201449	4.81566
chr2	37442650	37443149	4.81472
chr11	70647250	70647949	4.81468
chrX	94121900	94123799	4.81461
chr3	94974700	94975449	4.81401
chr5	104459500	104460599	4.81375
chr4	134287400	134288299	4.81349
chr11	93885150	93887249	4.81242
chr12	111166050	111167099	4.81175
chr11	17257650	17258249	4.81168
chr4	132048100	132049149	4.8114
chr15	99126150	99127499	4.8113
chr16	45742450	45743249	4.81114
chr5	119671100	119673099	4.81045
chr18	46524250	46525899	4.81027
chr11	106500950	106502149	4.81027
chr9	121719050	121720349	4.80929
chr15	96698900	96700399	4.80885
chr3	51559850	51560699	4.80799
chr7	127344900	127346099	4.80783
chr4	117189450	117189999	4.80769
chr9	106788400	106789149	4.80726
chr2	26932600	26933399	4.80687
chr16	52031150	52031449	4.80604
chr6	134919750	134920249	4.806
chr2	167660950	167661599	4.80587
chr11	80382750	80384049	4.80542
chr2	166157550	166157999	4.80509
chr5	117114950	117116299	4.80491
chr2	74696500	74697249	4.80489
chr9	70502950	70503849	4.80482
chr18	42274700	42275199	4.80419
chr4	94602350	94603699	4.8039
chr17	83989850	83991349	4.80389
chr7	134670700	134671599	4.80377
chr4	119539200	119540449	4.80333
chr3	137864550	137865599	4.80319
chr5	34573850	34574349	4.80266
chr5	142818050	142823499	4.80259
chr13	53284750	53286249	4.8022
chr9	123529800	123530449	4.80209
chr3	108653900	108654299	4.80203
chr5	139200650	139201199	4.80192
chr13	98814400	98815299	4.80185
chr16	87699000	87699999	4.80013
chr6	149188000	149188699	4.79979
chr17	6978950	6979599	4.79927
chr7	142547950	142548749	4.79924
chr15	76079950	76081599	4.79922
chrX	68678650	68679799	4.79846
chr7	46918950	46920749	4.79787
chr5	32459100	32460449	4.79756
chr9	14276400	14277199	4.79749
chr15	35937600	35938199	4.79701
chr18	34953150	34955649	4.79662
chr6	88044500	88045299	4.7957
chr5	149183450	149184299	4.79473
chr7	100607700	100608699	4.79401
chr16	17797300	17798349	4.79391
chr2	153161200	153162099	4.79377
chr7	19629000	19629399	4.79301
chr4	58668800	58670299	4.79235
chr5	98030450	98031249	4.7921
chr5	138170400	138171949	4.79183
chr2	131262500	131263349	4.79143
chr13	37826850	37827549	4.79061
chr13	15462150	15466049	4.79049
chr11	102555450	102556249	4.79035
chr14	73142450	73144299	4.79022
chr2	72475400	72477399	4.79001
chr11	120187450	120189899	4.78965
chr2	34753700	34754749	4.78826
chr6	71271650	71272749	4.78811
chr13	58214900	58216249	4.78782
chr17	74293850	74295899	4.78766
chr9	107633250	107634249	4.78603
chr6	52208900	52209399	4.78556
chr11	80809900	80811049	4.78496
chr9	44880400	44881399	4.78485
chr18	76241300	76242649	4.78459
chr1	24678600	24679249	4.78421
chr9	96630650	96631599	4.78404
chr16	56028950	56029699	4.78397
chr18	10725500	10726699	4.78355
chr6	100286550	100287449	4.78351
chr2	18045450	18048599	4.78342
chr19	7494200	7494999	4.78315
chr11	120233050	120235199	4.78273
chr3	95282750	95283499	4.78209
chr5	76303700	76305299	4.7819
chr8	78507900	78509999	4.78146
chr11	23665100	23665899	4.78136
chr13	21733750	21735649	4.78123
chr2	179976850	179977449	4.78108
chr11	64435700	64436549	4.77956
chr2	156110900	156112149	4.77918
chr6	100833600	100834499	4.77916
chr14	121378400	121380149	4.77882
chr11	29130700	29131399	4.77866
chr6	147475700	147476349	4.77848
chr13	119790350	119791549	4.77749
chr12	91590150	91591049	4.77728
chr7	13278150	13279249	4.77712
chr5	121544950	121546549	4.7771
chr1	130716950	130718099	4.77689
chr2	118549050	118549599	4.77674
chr6	48444450	48445799	4.77634
chr4	132842300	132843199	4.77596
chr2	130178200	130179349	4.77474
chr5	110769800	110770799	4.77459
chr7	98655750	98657699	4.77458
chr8	45974900	45975299	4.77362
chr4	134923600	134924549	4.7735
chr7	70358000	70362349	4.77331
chr17	56934800	56935549	4.77331
chr5	73292750	73293349	4.7728
chr13	34875450	34876199	4.77257
chr5	90364900	90367449	4.77245
chr8	94917650	94918299	4.77185
chr15	34082650	34083949	4.77181
chr9	61617450	61618449	4.77139
chr14	25378100	25379349	4.77122
chr17	13760350	13761599	4.77015
chr2	119594250	119595149	4.76973
chr14	79586950	79587649	4.76882
chr13	86045850	86046749	4.76864
chr7	28810850	28811899	4.76806
chr6	38874600	38876849	4.76792
chr17	88440700	88441999	4.76718
chr17	29346850	29347749	4.76684
chr14	52196200	52197799	4.76655
chr15	31600850	31602649	4.76643
chr15	79658400	79659299	4.76585
chr5	72558950	72559699	4.76568
chr4	138325700	138326249	4.76475
chr10	81266600	81267049	4.76442
chr10	120978250	120979999	4.76433
chr19	8723500	8724599	4.76429
chr13	51314800	51315949	4.76425
chr1	52232000	52233099	4.76348
chr11	70653200	70654599	4.76336
chr12	76961600	76962349	4.76219
chr10	42761500	42762549	4.76192
chr14	31001050	31002049	4.76161
chr19	7217050	7217649	4.76112
chr15	38077600	38078899	4.76098
chr1	38626500	38629249	4.7608
chr18	84084850	84085599	4.76006
chr8	84980200	84980949	4.75906
chr10	79960200	79960699	4.75857
chr5	53998550	53999399	4.75822
chr1	138963500	138964449	4.75791
chr5	93205250	93207299	4.75791
chrX	52912350	52913149	4.75778
chr2	31245250	31246799	4.75737
chr19	41933500	41933849	4.75692
chr8	109705500	109706349	4.7566
chr14	48446000	48446949	4.75645
chr2	64097750	64099049	4.75639
chr9	37488750	37490249	4.75591
chr13	60174450	60177449	4.7558
chr4	59782650	59783849	4.75537
chr15	79833300	79834249	4.75534
chr11	102446850	102447649	4.75523
chr8	70896400	70897499	4.75431
chr14	31250850	31252049	4.75368
chr19	55315500	55316699	4.7526
chr14	105176250	105177849	4.75235
chr6	35353750	35354899	4.75164
chr15	99369550	99370549	4.75161
chr16	32332300	32333249	4.75126
chr14	49172150	49173199	4.75074
chr12	111538150	111539299	4.74974
chr1	161034200	161034899	4.74906
chr15	85206000	85207049	4.74901
chr9	106685200	106686249	4.74869
chr5	129787350	129788199	4.74839
chr10	125966200	125967649	4.74811
chr12	73907950	73908949	4.74799
chr11	101645850	101646649	4.74748
chr9	99568250	99568999	4.7468
chr13	64152450	64153249	4.74675
chr2	122028600	122029299	4.74638
chr18	38601550	38602749	4.74621
chr4	101355950	101357299	4.74568
chr5	137785150	137786699	4.74556
chr15	88732950	88734449	4.74544
chr3	53462700	53464349	4.74529
chr14	55643050	55643949	4.74451
chr1	16103600	16105749	4.7445
chr4	134852350	134853399	4.74376
chr5	113771000	113772499	4.74341
chr10	128565200	128565999	4.743
chr4	135854950	135855999	4.74269
chr2	157462000	157463349	4.74233
chr7	143549400	143549849	4.74208
chr10	108161250	108163349	4.74194
chr17	46247450	46248549	4.74147
chr19	5729000	5729649	4.7411
chr9	72132700	72133699	4.74084
chr10	75212050	75212749	4.74011
chr12	3891700	3893199	4.73843
chr19	30029850	30031749	4.73834
chr8	41239650	41240849	4.73792
chr13	54071850	54072549	4.73745
chr4	155624950	155625449	4.73701
chr17	46383700	46384799	4.7362
chr5	123344100	123346249	4.73589
chr4	54471250	54471749	4.73585
chr4	108847800	108848499	4.73536
chr7	127231900	127234049	4.7351
chr5	24451950	24452749	4.73506
chr11	6474750	6475949	4.73467
chr9	119894350	119895499	4.73452
chr11	78165650	78166049	4.7334
chr7	116442700	116443449	4.7334
chr5	33651600	33652699	4.73227
chr2	167630900	167632399	4.732
chr10	75516650	75517299	4.73195
chr16	35983150	35984149	4.73174
chr15	89355750	89356499	4.73166
chr15	98662250	98663249	4.73165
chr17	83165950	83166799	4.73141
chr9	96196300	96197349	4.7314
chr15	79441100	79442399	4.73089
chr6	87334750	87335849	4.73044
chr7	80025200	80027549	4.73007
chr2	77280050	77280999	4.72982
chr2	181287100	181288199	4.72978
chr7	5014900	5016199	4.72883
chr18	75366300	75371549	4.72869
chr12	54795100	54795649	4.72838
chr8	33599500	33600399	4.72788
chr11	54866100	54867249	4.7272
chr10	22731550	22732199	4.72688
chr11	99040000	99042099	4.72663
chr11	96976850	96977749	4.72616
chr4	94614550	94615199	4.72577
chr15	58134200	58135049	4.7256
chr13	48966950	48969049	4.72555
chr10	22730500	22731449	4.72555
chr5	137778900	137779499	4.72522
chr16	15636650	15637349	4.72506
chr15	66577500	66578199	4.72467
chr2	25224000	25224649	4.72458
chr15	103365550	103366849	4.72451
chr2	38643300	38644399	4.72428
chr2	25982300	25983199	4.72419
chr6	136803400	136804449	4.72364
chr11	29172900	29173999	4.72344
chr4	143161350	143162199	4.72338
chr12	78748900	78749749	4.72244
chr4	106839100	106840499	4.72181
chr17	33955800	33956399	4.72167
chr14	31131100	31131949	4.72106
chr10	93160650	93161899	4.72051
chr3	95994650	95996649	4.72041
chr14	34502800	34503499	4.71995
chr14	20674250	20674999	4.71952
chr19	5071000	5071899	4.71904
chr1	74236550	74237299	4.71893
chr2	20967750	20969649	4.71858
chr11	58322850	58323299	4.71853
chr14	33446350	33447249	4.71852
chr11	23305600	23307549	4.71826
chr19	10602550	10602999	4.71816
chr1	195130900	195131649	4.71779
chr8	46163200	46164299	4.71718
chr4	118275800	118276599	4.7169
chr12	8674200	8675349	4.71599
chr4	72199600	72200849	4.71571
chr5	38561850	38562899	4.71543
chr10	79908350	79909149	4.71527
chr4	89137400	89138199	4.71444
chr9	14613550	14615149	4.7138
chr19	7040350	7041149	4.71352
chr8	48553750	48556249	4.71333
chr17	34980750	34982599	4.71174
chr2	168765200	168767149	4.7115
chr14	122106550	122107749	4.7114
chr3	121815300	121815949	4.71131
chr19	16132350	16133949	4.71114
chr12	84316500	84317899	4.71113
chr7	28808200	28810349	4.71095
chr15	79229050	79229649	4.71067
chr19	47067750	47068449	4.71056
chr1	24099500	24100849	4.71039
chr7	19024400	19024899	4.70963
chr3	95105800	95106849	4.70891
chr2	75657750	75658999	4.70868
chr19	8941900	8943099	4.70815
chr19	41829650	41830399	4.70792
chr15	55556900	55557999	4.70789
chr18	82910150	82911899	4.7078
chr14	50061400	50062699	4.70703
chr5	140320950	140322249	4.707
chr19	40894400	40895549	4.70688
chr3	86141600	86142599	4.70652
chr14	55824700	55825749	4.70642
chr9	45983650	45985349	4.70484
chr4	32238250	32239999	4.70476
chr4	155705100	155705599	4.70465
chr18	38418900	38419649	4.70434
chr11	120632450	120633599	4.70381
chr7	126976000	126976899	4.70373
chr4	151128050	151129599	4.70369
chr7	45642950	45643599	4.70333
chr8	70594450	70594899	4.70303
chr5	120612300	120612949	4.7024
chr3	69004300	69006299	4.70221
chr18	35598600	35599599	4.70204
chr7	12977950	12978749	4.70196
chr1	4807500	4808299	4.7018
chr8	119910800	119911699	4.7015
chr19	5295000	5295449	4.70136
chr15	102247200	102250399	4.70136
chr14	54652800	54653749	4.70063
chr18	57354700	57355399	4.70036
chr8	70509600	70511149	4.69994
chr6	143099300	143100099	4.69947
chr3	7503500	7503949	4.69925
chr8	47675350	47676399	4.69892
chr8	69995500	69996349	4.69771
chr8	124862400	124863799	4.69769
chr8	84686200	84688149	4.69754
chr7	126474600	126475449	4.6973
chr4	88031350	88033299	4.69699
chr5	142813300	142817649	4.69689
chr11	95309750	95310249	4.69624
chr2	174472500	174472999	4.69594
chr12	10390650	10391349	4.69594
chr11	104468600	104469449	4.69591
chr15	37007500	37008299	4.69568
chr5	119834650	119836249	4.69559
chr3	132683250	132684699	4.69442
chr5	100518400	100519199	4.69376
chr3	105686900	105687449	4.69328
chr3	89772950	89774349	4.69258
chr13	53465050	53465649	4.69198
chr17	35836600	35837149	4.69151
chr6	71631900	71632899	4.69141
chr17	29032650	29033799	4.69137
chr7	127025450	127027299	4.69133
chr2	155236150	155237249	4.69126
chr10	128492950	128494799	4.69067
chr5	52783050	52783399	4.69033
chr4	108458850	108460899	4.68995
chr2	122117750	122118399	4.68931
chr17	28485450	28486049	4.68924
chr7	132852150	132852799	4.6891
chr4	8910600	8911749	4.68901
chr8	72492900	72493499	4.68875
chr3	146813050	146813449	4.68861
chr11	22990550	22991099	4.68859
chr7	4684500	4685549	4.68817
chr2	158027900	158029449	4.68782
chr7	70350750	70351899	4.68729
chr19	40831250	40831999	4.68539
chr7	105777650	105779249	4.68523
chr11	69979900	69981849	4.68415
chr2	122348200	122349499	4.68358
chr1	55131150	55131949	4.68345
chr10	117375400	117376999	4.68312
chr2	156144200	156144699	4.68282
chr6	128437400	128438699	4.6825
chr9	44326550	44327399	4.68183
chr5	149635250	149637599	4.68173
chr3	58525050	58525799	4.68125
chr11	116581050	116581449	4.68111
chrX	103026500	103026949	4.68108
chr19	36833650	36834149	4.68077
chr14	78536200	78536949	4.6807
chr4	84884300	84885299	4.67952
chr15	58888500	58889849	4.67937
chr15	89122550	89123199	4.67936
chr11	59947900	59948699	4.67935
chr5	34949400	34950499	4.67933
chr18	63691400	63692999	4.67921
chr16	4789200	4790649	4.67911
chr4	88721700	88722549	4.6789
chr16	96081550	96082749	4.67881
chr19	46500150	46502399	4.67848
chr8	105297650	105298099	4.67829
chr11	53706800	53707749	4.67734
chr1	65186750	65187199	4.67701
chr3	58576700	58577449	4.67665
chr3	88530100	88533849	4.67631
chr7	98703100	98703849	4.67503
chr2	26139600	26140549	4.67483
chr2	69861150	69862199	4.67459
chr10	85916200	85917049	4.67438
chr6	24664000	24665049	4.6743
chr18	7609100	7609899	4.67425
chr16	91647850	91648799	4.67423
chr16	4718500	4719549	4.67376
chr16	94370000	94370499	4.67222
chr16	3884100	3884549	4.6722
chr17	33759900	33760399	4.67098
chr8	121653100	121653749	4.67063
chr15	37006400	37007449	4.67051
chr14	120911150	120911849	4.67018
chr15	78876750	78878599	4.6695
chr2	180701300	180702649	4.66895
chr12	95695250	95696399	4.66873
chr7	101905850	101906649	4.66846
chr8	68061750	68062749	4.66808
chr15	81871250	81872299	4.66764
chr11	6546100	6548199	4.66763
chr6	47920500	47921249	4.66754
chr7	25267550	25267899	4.66737
chr17	83705800	83706799	4.6671
chr7	92873850	92875049	4.66645
chr3	103279200	103280849	4.66626
chr5	64802450	64803149	4.66587
chr16	21211150	21212099	4.66571
chr19	8819900	8820899	4.66563
chr11	97662850	97664499	4.6656
chr13	93191550	93192449	4.66516
chr16	78375900	78376699	4.66515
chr2	156840050	156841549	4.66503
chr4	11253450	11254349	4.66456
chr11	73047750	73048499	4.66418
chr17	78736200	78736649	4.66411
chr17	20945400	20946299	4.66377
chr7	110613850	110615499	4.66311
chr8	27090150	27091499	4.66308
chr8	94666650	94667399	4.66307
chr5	5379750	5380749	4.66295
chr1	86433900	86434449	4.66278
chr12	85485400	85486049	4.66261
chr12	112828100	112829499	4.66196
chr16	44724050	44724849	4.66188
chr4	111414900	111415799	4.66047
chr2	3118400	3119249	4.66007
chr19	57361050	57362049	4.66002
chr16	37777100	37777699	4.6594
chr12	111038050	111039199	4.65932
chr13	94976350	94976749	4.65912
chr11	4135150	4135799	4.65911
chr5	74214450	74214899	4.65855
chr6	115773950	115774449	4.65772
chr7	35555200	35556149	4.6571
chr10	79554350	79555199	4.65682
chr6	146888500	146888999	4.65678
chr7	28741900	28742299	4.6563
chr14	56777600	56778699	4.65606
chr2	172939700	172940699	4.65584
chr8	83899850	83901199	4.65534
chr15	102073800	102074899	4.65458
chr12	79172350	79172799	4.65457
chr10	18055500	18056749	4.6544
chr11	101784150	101785249	4.65343
chr8	70673300	70674299	4.65305
chr3	116594950	116595449	4.65253
chr5	118560300	118561299	4.65235
chr7	120917850	120918399	4.65233
chr18	77064600	77066099	4.65207
chr6	71440900	71441849	4.65158
chr11	78164050	78165549	4.65089
chr15	12321400	12322449	4.65078
chr8	13287900	13288299	4.65074
chr4	129741050	129742349	4.64949
chr16	11066400	11067299	4.6493
chr1	87326950	87327799	4.64924
chr11	120230700	120231599	4.64786
chr11	52282600	52283299	4.6478
chr12	69681100	69682349	4.64773
chr11	95712850	95713749	4.64765
chr1	60409550	60410449	4.64756
chr9	107770150	107771099	4.64704
chr17	47009650	47010599	4.64697
chr18	20745550	20746399	4.64645
chr11	50324750	50325699	4.64571
chr7	55841900	55843249	4.64538
chr11	116853150	116853749	4.64535
chr6	125009050	125010099	4.64531
chr9	65032400	65033099	4.64454
chr17	35837200	35838249	4.64414
chr6	29768500	29769349	4.64391
chr7	31150200	31151449	4.64289
chr1	36557350	36558299	4.6426
chr11	61854350	61855349	4.64257
chr7	84151400	84152049	4.64253
chr16	92300900	92301299	4.64147
chr3	96219050	96220849	4.64093
chr4	107367500	107368549	4.64081
chr5	3928150	3929049	4.64028
chr2	156863100	156863649	4.64014
chr7	51861750	51862349	4.64007
chr15	98533100	98534349	4.6397
chr12	16894000	16895849	4.63947
chr1	186704250	186704849	4.63943
chr18	34220900	34221899	4.63904
chr15	82046800	82047599	4.63904
chr15	11994850	11996049	4.63896
chr5	121190750	121191799	4.63893
chr7	131409700	131410399	4.63821
chr5	92434150	92435199	4.63783
chr10	77515100	77516299	4.63749
chr16	36828400	36829099	4.63706
chr10	67096050	67097549	4.63706
chr8	82773500	82774199	4.63701
chr12	24707100	24709799	4.63694
chr11	54786900	54787649	4.63685
chr16	23107200	23108699	4.63616
chr19	53600050	53601099	4.63615
chr13	104816550	104817999	4.63567
chr10	128889150	128891649	4.63527
chr12	17881850	17882799	4.63459
chr9	122117300	122117799	4.63417
chr19	21653150	21654149	4.63416
chr3	121426500	121428399	4.63369
chr4	151995050	151996199	4.633
chr14	51984700	51985849	4.63283
chr1	170214900	170215449	4.63282
chr16	22266050	22266699	4.63201
chr7	130519150	130520349	4.63178
chr4	95318150	95318949	4.63172
chr10	61146450	61147649	4.63164
chr2	157078000	157079749	4.63155
chr17	24478800	24479399	4.63107
chr16	38522100	38522649	4.63101
chr13	21974350	21975049	4.63057
chr4	155831700	155832099	4.63029
chr19	47730400	47732149	4.63028
chr9	35420950	35423049	4.63004
chr4	125085150	125085749	4.62993
chr7	44245900	44247549	4.62987
chr17	80727300	80728599	4.62947
chr11	70969250	70969999	4.62923
chr14	118937900	118938599	4.62922
chr7	16924250	16924649	4.62922
chr2	14055050	14056399	4.62854
chr7	35646700	35647449	4.62772
chr15	10634300	10635699	4.62762
chr4	117914550	117915349	4.62754
chrY	90784150	90784849	4.62744
chr19	46043800	46045899	4.6271
chr9	40801150	40802299	4.62702
chr10	43579150	43581199	4.62692
chr6	118561850	118562699	4.62692
chr5	136986950	136988199	4.62672
chr11	97781550	97782349	4.62598
chr11	60219950	60220649	4.62598
chr11	59809700	59810449	4.62575
chr11	106919850	106921249	4.62493
chr3	85574050	85574549	4.62477
chr10	120743500	120744699	4.62477
chr13	60433950	60434999	4.62468
chr16	18629550	18629949	4.62458
chr1	153486750	153487699	4.62419
chr9	21091350	21092049	4.62418
chr15	93274650	93275149	4.624
chr13	24831650	24832499	4.62316
chr19	3685250	3686699	4.62309
chr11	40693450	40695149	4.62286
chr2	50296200	50296749	4.62242
chr1	151499800	151500949	4.62239
chr1	87853300	87853949	4.62197
chr3	100162000	100162399	4.62192
chr1	172026500	172027749	4.6216
chr4	120405150	120405949	4.62144
chr4	46389150	46390099	4.62086
chr7	5061150	5062099	4.62077
chr8	70691250	70691849	4.62052
chr16	8737500	8739249	4.62046
chr12	108554700	108555549	4.61961
chr1	86703700	86704399	4.61956
chr3	41565000	41566199	4.61955
chr2	164074150	164074749	4.61929
chr6	113377000	113378949	4.61846
chr8	84197200	84198549	4.61842
chr2	157423700	157425149	4.61807
chr8	69973450	69974699	4.61759
chr5	119829200	119834499	4.61733
chr9	72640400	72641499	4.61695
chr1	152624600	152625249	4.61666
chr11	96332700	96333999	4.61653
chr12	71014900	71015699	4.61642
chr2	5951100	5952299	4.61631
chr3	65391450	65392599	4.61582
chr7	130646100	130646749	4.61538
chr1	36511850	36512299	4.61483
chr15	102355450	102356699	4.61347
chr16	20651500	20652099	4.61344
chr2	30286400	30287349	4.61336
chr1	134361400	134362049	4.61334
chr1	125434650	125435649	4.61299
chr7	75848350	75848999	4.61277
chr8	20296850	20297549	4.61221
chr9	72531700	72533399	4.61195
chr4	126255350	126257299	4.61179
chr5	142904900	142905899	4.61176
chr12	76369050	76371399	4.61173
chr7	123123300	123124999	4.61152
chr9	59617300	59617949	4.6113
chr5	43233200	43234599	4.61088
chr14	62331800	62332799	4.61074
chr18	61045600	61047099	4.61037
chr11	115403700	115404599	4.61027
chr2	161108300	161109099	4.61021
chr5	142960200	142962699	4.60995
chr19	41263150	41264449	4.60966
chr11	62550100	62551099	4.60888
chr4	129334250	129335349	4.60862
chr11	60879000	60879499	4.60823
chr6	39724500	39725499	4.60822
chr7	25237200	25238099	4.60813
chr18	70568350	70569199	4.608
chr13	55727250	55727949	4.60703
chr15	83030350	83030699	4.60677
chr1	180725600	180726899	4.6065
chr7	44496000	44496649	4.60578
chr16	46496000	46497649	4.60558
chr7	126862050	126863099	4.60547
chr2	181520500	181521399	4.60545
chr11	88717600	88718249	4.6049
chr5	129725050	129725749	4.60485
chr17	70852300	70854249	4.6045
chr17	47501950	47502299	4.60393
chr17	28621600	28622499	4.60357
chr8	91799150	91801949	4.60319
chr5	122614050	122614599	4.60248
chr4	8689900	8692399	4.60235
chr15	79545400	79546649	4.60174
chr16	17452000	17452799	4.6013
chr11	75679250	75680099	4.60091
chr7	16046250	16048099	4.60089
chr1	59912300	59912849	4.60089
chr3	86545850	86548249	4.60069
chr2	16682950	16683299	4.60054
chr4	129742550	129743499	4.60044
chr7	133637700	133638399	4.60044
chr19	60889700	60890199	4.60026
chr6	72097150	72097499	4.60023
chr13	81783200	81783649	4.60005
chr18	46741250	46742549	4.59995
chr14	70599100	70599899	4.5999
chr7	25680700	25681049	4.59929
chr11	121353700	121354399	4.59863
chr5	108268450	108269599	4.59853
chr18	76943700	76944749	4.59849
chr7	80401850	80403299	4.5984
chr9	102644100	102644749	4.59822
chr3	96197100	96197699	4.59798
chr4	154633650	154638899	4.59784
chr19	10576550	10577849	4.59749
chr19	29251850	29252349	4.59744
chr3	88579600	88580099	4.59734
chr5	104508250	104508799	4.59698
chr5	73783000	73784249	4.59673
chr5	75155050	75156949	4.59558
chr9	44767250	44767849	4.59548
chrX	53056250	53057149	4.59541
chr1	91799900	91801649	4.59528
chr11	120824700	120825799	4.59511
chr11	29692950	29694249	4.59499
chr5	27790650	27792299	4.59454
chr11	59847700	59848599	4.5944
chr12	71309650	71310749	4.59397
chr6	113237850	113238399	4.59334
chr10	118869300	118869849	4.59134
chr6	124857150	124857949	4.59084
chr1	64956300	64956699	4.59055
chr2	38511650	38512449	4.59044
chr2	119112500	119113349	4.59033
chr13	30973700	30974049	4.58983
chr2	73528950	73530149	4.58966
chr12	75595400	75597149	4.58948
chr3	95217350	95218299	4.58937
chr12	27342900	27344249	4.58911
chr9	99629400	99630449	4.58899
chr18	35562150	35563849	4.58868
chr13	53202000	53202599	4.58833
chr15	80254350	80256599	4.58816
chr5	136881600	136883399	4.588
chr13	21811800	21812449	4.58782
chr17	29489600	29490399	4.5878
chr10	79704500	79705299	4.5872
chr3	58414150	58416099	4.58713
chr4	128805100	128806799	4.58669
chr17	46555200	46556249	4.58668
chr7	35801950	35802999	4.58668
chr6	37870800	37871699	4.58655
chr9	61370800	61371849	4.58655
chr7	132931100	132932399	4.58628
chr17	56289000	56290499	4.58626
chr10	40300750	40301949	4.58613
chr11	79993100	79994049	4.58594
chr11	71019550	71020299	4.58584
chr19	55662000	55662599	4.58539
chr1	39576200	39577399	4.58521
chrX	7899400	7899999	4.58511
chr16	45158200	45159499	4.58417
chr16	38089450	38090499	4.58411
chr13	21945150	21945899	4.58366
chr15	74708800	74709649	4.58337
chr9	123112500	123113699	4.58334
chr6	120836150	120836949	4.58325
chr17	46628650	46629449	4.58311
[truncated: 21,233 more rows]

## Sheet: WTvShhGli3
Chromosome	Start	End	Gli3_binding	WTinput_FC	WTinput_adjPval	ShhGli3input_FC	SHHGli3input_adjPval	WTShhGli3_FC	WTShhGli3_adjPval
chr11	3123350	3124149	Nooverlap	2.20704	0.0147985	2.76604	0.00340392	-0.723819	0.368465
chr11	3201500	3203699	Stable	3.46418	0.0111299	4.65005	1.23203e-05	-0.884485	0.326503
chr11	3265450	3266399	Stable	3.02224	0.0111299	3.58919	0.000310664	-0.520493	0.457039
chr11	3266600	3267049	Stable	3.16144	0.0111299	2.77621	0.00330645	-0.531853	0.443204
chr11	3288350	3293599	Stable	3.04646	0.0111299	3.71682	0.000207673	-0.698761	0.368048
chr11	3347750	3347899	Nooverlap	2.18388	0.0379516	-0.0911579	0.920567	0.772918	0.372025
chr11	3348600	3348849	Nooverlap	2.19727	0.0359494	2.19382	0.0162506	-0.122605	0.860372
chr11	3349100	3349199	Nooverlap	2.58907	0.0313908	2.34432	0.0107927	0.163591	0.827231
chr11	3349750	3349849	Nooverlap	1.8818	0.0538692	-0.582293	0.517056	0.835523	0.340164
chr11	3371700	3371899	Nooverlap	1.87596	0.0285278	2.68167	0.0043185	-0.941134	0.307641
chr11	3373800	3374549	Stable	1.77462	0.0188976	2.70879	0.00399938	-0.386828	0.560296
chr11	3451850	3452249	Stable	2.63919	0.0145113	2.83798	0.00280082	-0.489824	0.491168
chr11	3452450	3453099	Stable	3.12261	0.0117466	2.74557	0.00360999	-0.620417	0.414147
chr11	3535550	3536099	Nooverlap	2.62309	0.0111874	2.1861	0.0165935	-0.41058	0.576891
chr11	3538950	3539149	Nooverlap	1.22877	0.0255366	2.38513	0.00967206	-0.0644851	0.93197
chr11	3648200	3649899	Nooverlap	3.02084	0.0111299	3.89531	0.000118032	-0.714749	0.366278
chr11	3894400	3895749	Stable	3.45929	0.0111299	2.8146	0.00298698	-0.306845	0.648974
chr11	3963600	3964699	Stable	3.38123	0.0111299	3.36124	0.000623562	-0.418205	0.536526
chr11	4096250	4096549	Stable	1.65225	0.018197	2.51846	0.00670557	-0.567031	0.449669
chr11	4096950	4097549	Stable	2.75071	0.0111299	2.31104	0.0118243	-0.264083	0.703292
chr11	4135200	4135599	Nooverlap	2.52473	0.0118367	2.73823	0.00369061	-0.24666	0.717355
chr11	4146050	4146249	Nooverlap	3.05222	0.0158292	1.00689	0.260469	0.992247	0.32899
chr11	4159950	4160199	Stable	3.56365	0.0125378	2.52943	0.00650862	0.201615	0.762818
chr11	4160350	4161049	Stable	3.33825	0.0111299	3.90234	0.000115511	-0.724229	0.374683
chr11	4186900	4187299	Nooverlap	2.06962	0.0168931	3.12842	0.00123563	-0.0571331	0.93232
chr11	4503900	4504099	Nooverlap	1.85138	0.0136988	0.984099	0.271413	1.14685	0.293249
chr11	4594000	4594899	Nooverlap	3.3883	0.0111299	3.65337	0.000254369	-0.494223	0.481598
chr11	4595150	4595299	Nooverlap	1.36962	0.0312665	2.58534	0.00559647	-0.936162	0.317889
chr11	4605050	4605199	Nooverlap	-1.11394	0.119699	1.32944	0.137494	-1.60938	0.258446
chr11	4630450	4630599	Nooverlap	1.42076	0.118074	1.74234	0.0528005	-0.432324	0.592908
chr11	4637800	4637999	Nooverlap	1.83033	0.0141316	2.18984	0.0164199	-0.509244	0.484608
chr11	4678950	4679249	Nooverlap	2.11074	0.0118367	1.20087	0.179627	0.295544	0.652922
chr11	4704000	4704599	Nooverlap	2.4586	0.014284	3.18696	0.00103797	-0.890982	0.339396
chr11	4792300	4793049	Nooverlap	0.633164	0.0910029	2.63384	0.00490929	-1.68227	0.258446
chr11	4803600	4803699	Nooverlap	0.487198	0.710158	2.28492	0.0126915	-1.21129	0.34678
chr11	4848800	4849499	Stable	3.46851	0.0111299	4.68448	1.13215e-05	-0.893965	0.32978
chr11	4849750	4850049	Stable	2.07649	0.0121768	4.81282	7.79553e-06	-0.170105	0.793312
chr11	4895050	4895249	Nooverlap	2.4028	0.0111874	2.36363	0.0102595	-0.322243	0.669589
chr11	4986950	4987199	Nooverlap	1.1723	0.0418182	2.1792	0.0169133	-1.01075	0.290321
chr11	5064950	5065199	None	2.31824	0.0134599	2.65885	0.00459197	-0.476033	0.491002
chr11	5097450	5100149	Nooverlap	4.33106	0.0111299	4.94899	5.51433e-06	-0.945483	0.309603
chr11	5100200	5100499	Nooverlap	2.44757	0.0122815	0.988202	0.26947	0.316816	0.654944
chr11	5244650	5244899	Nooverlap	1.81882	0.0134618	2.34203	0.0108515	-0.0894701	0.89094
chr11	5261200	5261599	None	3.30648	0.0111299	3.56389	0.00033605	-0.399159	0.557965
chr11	5297400	5298099	Nooverlap	1.71853	0.014651	3.07879	0.00142735	-0.770141	0.363014
chr11	5298350	5298949	Nooverlap	1.2002	0.0262545	2.61906	0.005117	-0.519312	0.476744
chr11	5443750	5444799	Stable	2.93726	0.0111299	3.61818	0.000285311	-0.701937	0.367342
chr11	5520350	5520799	Nooverlap	2.55037	0.0316935	2.89667	0.00237393	-0.876728	0.332297
chr11	5520900	5522099	Nooverlap	3.5017	0.0111299	3.83876	0.000140566	-0.451923	0.502762
chr11	5541450	5542299	Nooverlap	3.68336	0.0111299	3.75141	0.000185672	-0.615847	0.443495
chr11	5707250	5707699	Nooverlap	2.20372	0.0115867	3.04182	0.00157439	-0.882421	0.317671
chr11	5740700	5741399	Nooverlap	2.40067	0.0112294	2.93818	0.00210803	-0.493316	0.48974
chr11	5761700	5762449	Stable	2.10269	0.011912	2.71503	0.00392872	-0.557809	0.448814
chr11	5762500	5762799	Stable	2.04859	0.0394309	2.81177	0.00300624	-0.273396	0.690848
chr11	5787950	5788349	Stable	2.93093	0.0215135	2.5326	0.00645959	-0.838763	0.338968
chr11	5788600	5789149	Stable	2.76799	0.0111299	2.58395	0.0056162	-0.488217	0.484763
chr11	5837550	5837799	Nooverlap	1.4775	0.0189147	2.28373	0.0127312	-0.952523	0.30357
chr11	5877950	5878199	Nooverlap	3.19431	0.0132257	2.35139	0.0105929	-0.130349	0.845367
chr11	5878400	5878949	Nooverlap	2.18961	0.0136503	2.57763	0.00570746	-0.32714	0.664721
chr11	5955400	5956299	Nooverlap	2.88989	0.0120536	2.69386	0.00416941	-0.432944	0.528684
chr11	6199600	6200749	Nooverlap	2.94635	0.0112704	3.40283	0.000549471	-0.577156	0.432033
chr11	6267250	6267799	Stable	2.32729	0.0263717	2.91337	0.0022642	-0.590164	0.447103
chr11	6267850	6268249	Stable	2.57014	0.0290756	2.81867	0.00295812	-0.539564	0.468175
chr11	6274300	6274799	Nooverlap	2.68106	0.0112303	2.51409	0.00679194	-0.661369	0.378369
chr11	6275050	6275199	Nooverlap	1.31127	0.0641502	2.22471	0.014931	0.141037	0.833363
chr11	6291600	6291899	Nooverlap	0.813004	0.321254	3.07546	0.00144029	-1.21112	0.284537
chr11	6292000	6292599	Nooverlap	2.14273	0.0148607	3.17893	0.00106446	-0.743985	0.357221
chr11	6388650	6389349	Nooverlap	2.22688	0.0114182	3.48097	0.000435072	-0.574464	0.44263
chr11	6389500	6389899	Nooverlap	3.72918	0.0111299	2.71439	0.00393712	0.0935732	0.885734
chr11	6406000	6406249	Nooverlap	0.824474	0.0605311	2.31165	0.011803	-0.432704	0.533459
chr11	6415100	6417249	Stable	3.51079	0.0111299	4.42428	2.25914e-05	-0.857738	0.32864
chr11	6443750	6444499	Stable	2.80869	0.0111299	3.25369	0.000858195	-0.520576	0.451474
chr11	6444800	6445249	Stable	2.93576	0.0114249	1.98982	0.0280141	0.00551658	0.994206
chr11	6474800	6476699	Nooverlap	3.2923	0.0111299	3.94641	9.9885e-05	-0.63118	0.402129
chr11	6527100	6528849	Nooverlap	3.32889	0.0111299	3.65668	0.000252101	-0.421178	0.53576
chr11	6546000	6548049	Stable	3.08749	0.0111874	3.65225	0.00025493	-0.99722	0.305964
chr11	6625400	6626849	Nooverlap	3.21779	0.0111299	3.56813	0.000331427	-0.555197	0.45787
chr11	6889700	6889899	Nooverlap	1.98969	0.012863	2.08201	0.0219444	-0.203059	0.767337
chr11	6900800	6900949	Nooverlap	0.805461	0.067913	2.50461	0.00696874	-0.546396	0.460275
chr11	7281200	7281299	Nooverlap	2.95334	0.0185585	0.506689	0.57327	0.52928	0.465431
chr11	7735950	7736099	Nooverlap	0.773239	0.136651	1.7758	0.0485703	-0.723002	0.374723
chr11	8069300	8069549	Nooverlap	1.48669	0.0808413	2.4488	0.00813222	-1.09753	0.289779
chr11	8468300	8469299	Nooverlap	2.17944	0.014113	3.2013	0.000994823	-0.471808	0.488716
chr11	8469600	8469999	Nooverlap	2.12853	0.0166746	1.94336	0.0316849	0.181328	0.781138
chr11	8483850	8483999	Nooverlap	2.53927	0.0517776	-0.080848	0.929558	0.771871	0.379677
chr11	8623500	8625599	HH-Sensitive	3.28148	0.0111299	3.88157	0.000123455	-0.873523	0.318785
chr11	8653300	8653599	Nooverlap	1.49253	0.0197759	2.39252	0.00947422	-0.0639702	0.923306
chr11	8656300	8656999	Stable	2.4618	0.0119466	3.47107	0.000446819	-1.04242	0.293594
chr11	8657250	8659199	Stable	2.33074	0.0120137	3.13398	0.0012159	-1.25115	0.263429
chr11	8659500	8659899	Stable	0.944467	0.0507522	2.87739	0.00250895	-1.87205	0.258446
chr11	8662350	8662549	Nooverlap	0.44131	0.287839	2.50489	0.00696779	-1.22423	0.260551
chr11	8663800	8664599	Nooverlap	2.80048	0.0111299	3.50946	0.000397428	-0.585895	0.415487
chr11	8675800	8675949	Nooverlap	0.257588	0.777664	2.17511	0.0170991	-1.39774	0.261684
chr11	8676550	8676749	Nooverlap	1.8449	0.0142189	2.48449	0.00737419	-1.4722	0.258446
chr11	8693150	8693399	Nooverlap	1.38266	0.0204249	2.26899	0.0132524	-1.04267	0.292081
chr11	8761450	8761949	Nooverlap	1.86337	0.0141329	2.53791	0.0063601	-0.928248	0.319043
chr11	8762150	8762299	Nooverlap	0.694365	0.145881	1.09448	0.221167	-1.20505	0.270428
chr11	8764350	8764549	Nooverlap	0.235305	0.51764	2.27755	0.0129347	-1.52246	0.258446
chr11	8811300	8812199	Nooverlap	2.32302	0.014294	2.97693	0.00189254	-0.608487	0.460197
chr11	8812800	8813249	Nooverlap	0.900065	0.199601	2.4036	0.00920332	-1.2495	0.284537
chr11	8813400	8814499	Stable	1.8059	0.0135755	2.78731	0.00320722	-1.40783	0.259854
chr11	8814750	8815149	Stable	1.02532	0.0575375	2.32626	0.0113237	-0.953186	0.319295
chr11	8815550	8815699	Nooverlap	-0.190053	0.5798	2.5772	0.00571297	-1.9279	0.258446
chr11	8816000	8816449	Nooverlap	1.83037	0.0218517	2.55859	0.00601421	-1.29868	0.277213
chr11	8816700	8817249	Nooverlap	1.04938	0.0408087	2.79677	0.00312669	-1.64889	0.258446
chr11	8817400	8817749	Nooverlap	0.651925	0.293402	2.66258	0.00454515	-0.959316	0.330833
chr11	8818000	8818149	Nooverlap	1.60997	0.156941	1.43617	0.108877	-0.658806	0.43637
chr11	8826550	8826649	Nooverlap	1.77338	0.0284396	2.39924	0.00930431	0.220011	0.743302
chr11	9010250	9011599	Nooverlap	3.40255	0.0111299	3.44702	0.000479598	-0.493015	0.471656
chr11	9975450	9975599	Nooverlap	1.12992	0.0368576	2.4648	0.00779075	-0.280408	0.693209
chr11	11461900	11462349	Nooverlap	2.62454	0.0111299	2.29621	0.0123096	-1.0249	0.284667
chr11	11807950	11808149	Nooverlap	1.05945	0.0824801	1.96672	0.0297935	0.0614152	0.929965
chr11	11808250	11810849	Stable	3.82188	0.0111299	4.44413	2.11699e-05	-0.86575	0.33295
chr11	11820700	11820849	Nooverlap	2.11559	0.0116612	2.39603	0.00938913	-0.000882962	0.999146
chr11	11821000	11821249	Stable	2.38876	0.0247206	2.84911	0.00272377	-0.602099	0.442641
chr11	11821550	11823449	Stable	2.70874	0.0122468	3.44287	0.000485494	-0.68234	0.384999
chr11	11828100	11829499	Stable	2.31595	0.0112905	2.73246	0.00374086	-0.665102	0.386845
chr11	11829600	11830149	Nooverlap	1.56577	0.0544949	2.41334	0.00896784	-0.731531	0.369517
chr11	11830850	11831499	Nooverlap	2.08331	0.01274	3.35812	0.000629938	-0.813088	0.358227
chr11	11831550	11833249	Stable	2.4897	0.0147625	3.69123	0.000226314	-1.10858	0.308379
chr11	11833550	11834049	Stable	2.15137	0.0125428	2.80909	0.00302744	-0.938717	0.344325
chr11	11836350	11836549	Nooverlap	0.163005	0.856046	1.8734	0.037895	-1.09743	0.317575
chr11	11836900	11837199	Nooverlap	3.45761	0.0127721	1.23843	0.166442	0.0120028	0.986902
chr11	11855100	11855249	Nooverlap	0.963611	0.0594165	2.51831	0.00670885	-1.12096	0.274232
chr11	11855850	11856099	Nooverlap	0.62582	0.449865	2.45477	0.00801586	-1.18788	0.293253
chr11	11878450	11878649	Nooverlap	1.54453	0.018189	1.74582	0.0523548	-0.595951	0.414147
chr11	11948650	11948849	Nooverlap	1.14261	0.191383	2.4064	0.00912836	-0.614937	0.497893
chr11	12034300	12034699	Nooverlap	2.8962	0.0132504	3.46496	0.000454352	0.672884	0.403582
chr11	12034900	12035399	Nooverlap	2.06228	0.0118724	2.43924	0.00834029	-0.0399048	0.953678
chr11	12035500	12035699	Nooverlap	2.27125	0.0114104	1.82402	0.0430567	0.0315391	0.963146
chr11	12035850	12038999	Nooverlap	3.10571	0.0111299	3.55	0.000350324	-0.656848	0.382348
chr11	15851100	15851249	Nooverlap	1.00146	0.36996	2.16809	0.0174271	-0.887077	0.359028
chr11	16507450	16508699	Nooverlap	2.70088	0.0111299	4.02051	7.96831e-05	-0.628797	0.407431
chr11	16559400	16559599	Nooverlap	2.35976	0.0112691	1.49265	0.0958851	0.252776	0.699555
chr11	16950850	16951099	Nooverlap	1.72668	0.0154449	2.22346	0.0149816	-0.365924	0.583348
chr11	17083500	17083699	Nooverlap	2.40635	0.0111365	1.81744	0.0437627	-0.722605	0.371688
chr11	17083850	17084099	Nooverlap	1.21431	0.0839289	2.33465	0.0110773	-1.27276	0.284537
chr11	17084650	17084899	Nooverlap	1.42229	0.0584195	3.03051	0.00162427	-1.17448	0.301023
chr11	17086600	17086749	Nooverlap	1.3697	0.0320883	2.37783	0.00985612	-0.162262	0.805693
chr11	17158750	17159049	Nooverlap	2.1535	0.0115003	2.43401	0.00845853	-0.0199624	0.978895
chr11	17159250	17160399	Nooverlap	3.95019	0.0111299	4.69623	1.09461e-05	-0.832213	0.33275
chr11	17211100	17212349	Stable	3.3527	0.0111299	3.0685	0.00146668	-0.754077	0.36643
chr11	17248950	17249049	Nooverlap	0.924139	0.20596	1.94006	0.0319257	0.13683	0.847683
chr11	17257550	17258249	Nooverlap	4.33548	0.0111299	3.32509	0.000695429	-0.213308	0.742989
chr11	17441500	17441599	Nooverlap	-0.851524	0.271693	1.48518	0.0975055	-2.47845	0.258446
chr11	17441750	17442299	Nooverlap	1.42415	0.0298356	3.18335	0.00104902	-1.11814	0.297818
chr11	17442500	17442699	Nooverlap	0.247032	0.459562	3.03111	0.00162191	-0.661903	0.407039
chr11	17442750	17442949	Nooverlap	0.947051	0.041288	1.75677	0.050928	-0.768847	0.355524
chr11	17449200	17449499	Nooverlap	1.09014	0.0894952	2.66574	0.00451311	-0.866139	0.358272
chr11	17449600	17450599	Stable	2.4135	0.0111365	2.80633	0.00305167	-0.891846	0.349494
chr11	17450850	17451199	Stable	1.93825	0.0138281	2.37348	0.00997603	-0.913062	0.320317
chr11	17952950	17953999	Nooverlap	3.35342	0.0111299	4.701	1.07879e-05	-0.872643	0.320253
chr11	18011100	18011249	Nooverlap	0.894807	0.0517015	2.34389	0.0107968	-0.609725	0.409871
chr11	18014400	18014599	Nooverlap	-0.273881	0.5549	3.3514	0.000641272	-2.0045	0.258446
chr11	18015000	18015349	Nooverlap	1.79085	0.0639328	2.48886	0.00728182	-1.20324	0.299931
chr11	18450950	18451199	Nooverlap	0.818824	0.0550629	3.28507	0.000781364	-1.06059	0.35894
chr11	18489350	18489649	Nooverlap	1.7996	0.0364173	2.61755	0.0051355	-1.13602	0.304898
chr11	18490150	18490449	Nooverlap	0.789519	0.0628113	2.84372	0.00275747	-0.903958	0.410677
chr11	18711950	18712349	Nooverlap	0.36229	0.397042	2.4908	0.00723978	-1.15982	0.305584
chr11	18713150	18714449	Stable	2.00153	0.0317796	3.43452	0.000498753	-1.20485	0.297818
chr11	18714600	18715149	Nooverlap	1.86652	0.0226775	3.177	0.00107114	-1.35481	0.261112
chr11	18747750	18747899	Nooverlap	1.07647	0.0343034	1.91812	0.0337964	-0.509039	0.499048
chr11	18749200	18749649	Nooverlap	2.64058	0.014718	2.26899	0.0132524	-0.420833	0.553207
chr11	18757650	18757799	Nooverlap	3.08483	0.0263914	1.91167	0.0343566	-0.744212	0.449174
chr11	18758350	18758599	Stable	2.47218	0.0116869	3.10418	0.00132393	-0.558626	0.490732
chr11	18758900	18759749	Stable	1.61391	0.0573277	2.52788	0.006535	-1.1872	0.304564
chr11	18871750	18872099	Nooverlap	2.57006	0.0120288	3.06349	0.00148768	-0.0596936	0.935075
chr11	18877100	18877649	Nooverlap	2.72674	0.0111299	2.75068	0.00355949	-0.314969	0.649145
chr11	18877750	18879249	Nooverlap	2.63421	0.0111365	3.23435	0.000907659	-0.918633	0.320292
chr11	18879600	18879949	Nooverlap	1.67248	0.0152584	2.96209	0.00196954	-0.76983	0.362187
chr11	18882950	18883199	Nooverlap	1.16594	0.0322941	2.53968	0.00633012	-1.16722	0.289709
chr11	18883800	18886699	Nooverlap	2.19646	0.017872	3.74141	0.000192209	-1.25778	0.293116
chr11	18916850	18917049	Nooverlap	2.30802	0.0534809	1.99337	0.0277635	-0.777195	0.380697
chr11	18930100	18930249	Nooverlap	1.19728	0.0444897	2.18223	0.0167726	-1.11101	0.323866
chr11	18930650	18931199	Nooverlap	1.42841	0.0202571	3.40349	0.000548509	-1.55272	0.260023
chr11	18944450	18944599	Nooverlap	1.77329	0.0276882	1.94408	0.0316216	-0.872329	0.331405
chr11	18945250	18945399	Nooverlap	1.54453	0.018189	1.19622	0.181346	-0.775688	0.369505
chr11	18945600	18945799	Nooverlap	1.54816	0.0304646	2.55157	0.00612804	-0.354549	0.653765
chr11	18946200	18946349	Nooverlap	2.45765	0.0111299	2.39438	0.00942445	-0.584197	0.426001
chr11	18981100	18982199	Nooverlap	2.283	0.0216013	3.31018	0.000726591	-0.710579	0.450595
chr11	18982500	18983299	Nooverlap	2.06686	0.0261939	2.79559	0.00313808	-0.89438	0.370639
chr11	19013050	19013299	Nooverlap	1.62989	0.0609717	3.00679	0.00173866	-1.04429	0.307233
chr11	19013400	19020499	Nooverlap	3.55863	0.0111299	3.81898	0.000149274	-0.460017	0.51049
chr11	19020650	19021449	Nooverlap	2.75783	0.0121768	2.57204	0.00580083	-0.587465	0.451933
chr11	19026900	19027199	Nooverlap	2.0566	0.012349	2.46528	0.00778118	-0.20216	0.772107
chr11	19057000	19057249	Nooverlap	1.63893	0.0155113	2.56099	0.00597453	-0.402284	0.589588
chr11	19067700	19067949	Nooverlap	0.14582	0.882584	2.03003	0.0252104	-1.86829	0.258446
chr11	19068400	19068549	Nooverlap	-0.189462	0.899852	2.26416	0.0134271	-2.33613	0.258446
chr11	19350750	19350849	Nooverlap	2.38148	0.0705952	1.25288	0.161594	-0.499971	0.549424
chr11	19409600	19409949	Nooverlap	1.4428	0.0341619	2.51575	0.00675958	-1.03209	0.292081
chr11	19424050	19424499	Nooverlap	0.841546	0.0733183	2.6948	0.00415928	-1.02159	0.311282
chr11	19609800	19609949	Nooverlap	0.751741	0.510012	1.67498	0.0622915	-1.05866	0.348724
chr11	19610250	19610449	Nooverlap	0.891126	0.371822	2.80376	0.00307396	-2.02338	0.259589
chr11	19611000	19611199	Nooverlap	0.845218	0.342704	2.17876	0.0169347	-1.21605	0.343925
chr11	19631150	19631599	Stable	1.20173	0.0402407	3.0775	0.00143222	-1.23471	0.276285
chr11	19631800	19631949	Stable	0.891829	0.374157	2.16141	0.0177304	-1.78594	0.258446
chr11	19737700	19737949	Nooverlap	1.3054	0.0994271	2.89827	0.00236443	-1.41205	0.262158
chr11	19919600	19920099	Nooverlap	1.9731	0.0193737	2.66709	0.00449449	-0.477198	0.492813
chr11	19920300	19920799	Nooverlap	2.55887	0.0114416	3.04299	0.00156919	-0.298582	0.65592
chr11	19923900	19926299	Stable	3.34495	0.0111299	4.15394	5.28962e-05	-0.81871	0.336677
chr11	19969200	19969599	Nooverlap	0.672815	0.168939	2.48226	0.00741959	-1.14685	0.284227
chr11	19970050	19970199	Nooverlap	0.601344	0.121505	2.69499	0.00415717	-0.808709	0.354446
chr11	19985050	19985299	Nooverlap	1.29159	0.0243949	3.03168	0.00162086	-0.334429	0.621968
chr11	19986350	19986549	Nooverlap	1.21653	0.0376281	2.09653	0.0211257	-1.27466	0.259589
chr11	19986650	19988949	Stable	1.77495	0.0140487	3.11311	0.00129365	-1.37913	0.26176
chr11	19989100	19989249	Nooverlap	0.700029	0.101791	2.28959	0.0125464	-0.347922	0.601094
chr11	20040750	20040849	Nooverlap	1.3697	0.0320883	1.63758	0.0682164	-0.710184	0.406755
chr11	20112250	20112749	Nooverlap	2.68426	0.0139573	3.22739	0.000925288	-0.563015	0.453498
chr11	20113100	20113399	Nooverlap	1.85394	0.0338191	2.60008	0.00537821	-0.256354	0.707409
chr11	20200600	20200999	Nooverlap	2.58737	0.0183518	2.4854	0.00735341	-0.400057	0.559028
chr11	20201300	20202249	Nooverlap	3.49867	0.0111299	3.96291	9.50129e-05	-0.915849	0.32405
chr11	20228850	20229049	Nooverlap	1.92407	0.0541469	1.75799	0.0507618	1.31883	0.292103
chr11	20248550	20250249	Nooverlap	3.7593	0.0111299	3.89363	0.000118835	-0.655792	0.388
chr11	20331800	20332599	Nooverlap	1.62421	0.0234769	3.17704	0.00107112	-0.789744	0.339404
chr11	20333000	20333549	Nooverlap	2.69465	0.0149168	2.86779	0.00258219	-0.330958	0.620246
chr11	20400700	20400899	Nooverlap	1.79152	0.0912229	2.97299	0.00191278	-0.34211	0.637959
chr11	20542250	20542649	HH-Dependent	2.51328	0.0111299	2.79752	0.00312185	-0.0237023	0.971676
chr11	20543200	20543749	HH-Dependent	3.05237	0.0111299	2.88645	0.00244687	-0.491579	0.476261
chr11	20576250	20576499	Nooverlap	1.18837	0.029099	2.29635	0.0123065	-0.139288	0.841475
chr11	20631500	20631799	Nooverlap	1.48404	0.0212587	2.99373	0.001804	-0.934919	0.30448
chr11	20632000	20632849	Nooverlap	2.59484	0.0111299	3.59989	0.000299968	-0.50705	0.4624
chr11	20639950	20640799	None	2.16848	0.0140665	3.26717	0.000826718	-0.942551	0.315922
chr11	20740950	20741499	Stable	3.18925	0.0111299	4.02228	7.94605e-05	-0.668544	0.389637
chr11	20741750	20742299	Stable	2.47282	0.0111587	3.75435	0.000183788	-0.532619	0.461881
chr11	20830500	20831299	Nooverlap	2.63381	0.0111299	3.54613	0.000354508	-0.84323	0.329317
chr11	20915100	20915649	Nooverlap	1.63012	0.105063	2.26992	0.0132173	-0.79887	0.359597
chr11	20916100	20916299	Nooverlap	1.74107	0.0802517	2.23676	0.0144779	-0.422316	0.576038
chr11	20921750	20921899	Nooverlap	0.824443	0.0594613	1.60973	0.0728785	-0.452678	0.51993
chr11	21091150	21092399	Nooverlap	4.06077	0.0111299	4.95357	5.51433e-06	-0.682256	0.374683
chr11	21238250	21239949	Stable	4.22576	0.0111299	4.15172	5.31126e-05	-0.506846	0.471648
chr11	21370200	21371299	Stable	2.80825	0.0111299	3.65424	0.000253457	-0.772418	0.34678
chr11	21371450	21371749	Stable	1.85825	0.0157022	2.19518	0.0161872	-0.34077	0.626796
chr11	21571550	21571749	Nooverlap	2.54494	0.015727	2.00556	0.0269012	-0.381835	0.572807
chr11	22286400	22287049	Nooverlap	2.66576	0.0111365	3.03978	0.00158375	-0.639373	0.387862
chr11	22287400	22287849	Nooverlap	3.2631	0.0111299	2.09405	0.0212607	-0.0680432	0.925333
chr11	22347250	22348299	Nooverlap	2.38467	0.0153424	2.95095	0.0020298	-0.563807	0.445021
chr11	22348700	22349149	Nooverlap	2.12888	0.0120935	2.56494	0.00591039	-0.219271	0.768247
chr11	22512050	22513149	Nooverlap	3.75978	0.0111299	3.25311	0.000858513	-0.284764	0.660901
chr11	22673750	22673849	Nooverlap	2.56474	0.0151566	1.85506	0.0397243	-0.235762	0.724197
chr11	22829050	22829199	Nooverlap	2.20029	0.0200259	2.29073	0.0125034	-0.171602	0.795855
chr11	22972900	22973149	Nooverlap	1.08864	0.0847712	2.57569	0.00573903	-0.760592	0.355731
chr11	22973200	22973499	Nooverlap	3.05027	0.0116206	2.04488	0.0242338	0.0544489	0.935484
chr11	22981700	22982499	Stable	2.49336	0.0115642	2.94219	0.0020817	-0.900432	0.332779
chr11	22990250	22991849	Nooverlap	3.61765	0.0111299	3.43653	0.000495349	-0.184816	0.779658
chr11	23210950	23211149	Nooverlap	1.40289	0.0199238	1.95143	0.0310014	-0.122348	0.854078
chr11	23211500	23211699	Nooverlap	2.41356	0.0657473	0.991748	0.267723	-0.248634	0.737174
chr11	23254800	23255499	Nooverlap	2.44636	0.0112063	3.1627	0.00111681	-0.607405	0.414898
chr11	23255750	23257999	Nooverlap	4.30313	0.0111299	5.06039	4.43409e-06	-0.665249	0.378369
chr11	23305600	23307699	Stable	3.8538	0.0111299	4.43056	2.2071e-05	-0.843536	0.335022
chr11	23497300	23498049	Nooverlap	3.46484	0.0111299	4.55432	1.60415e-05	-0.863697	0.335539
chr11	23498300	23498599	Nooverlap	1.62571	0.0183487	3.10653	0.00131601	-0.388943	0.559448
chr11	23632850	23633699	Stable	2.95759	0.0111299	3.71695	0.00020761	-0.603232	0.404794
chr11	23664900	23666799	Stable	2.56762	0.0111299	3.38473	0.000578531	-0.430659	0.51953
chr11	23770500	23771599	Stable	2.6521	0.0116702	3.31684	0.000714135	-0.69961	0.372025
chr11	23894450	23895199	Nooverlap	2.76999	0.0111299	2.67342	0.00442147	-0.288167	0.659456
chr11	24077100	24077849	Stable	2.14459	0.0477049	3.08948	0.00138468	-0.846401	0.340081
chr11	24078150	24080199	Stable	2.37267	0.0121129	3.2065	0.000982338	-0.823936	0.33289
chr11	24080300	24082549	Stable	2.66796	0.0136415	3.24254	0.000886786	-0.887444	0.320136
chr11	24141850	24142049	Nooverlap	4.03839	0.0111299	1.95143	0.0310014	-0.405887	0.551527
chr11	24201950	24204049	Nooverlap	1.57166	0.0186411	3.784	0.000167085	-1.51821	0.258446
chr11	24363400	24363549	Nooverlap	0.129977	0.670346	2.32241	0.0114507	-1.54358	0.258446
chr11	24370250	24370399	Nooverlap	1.61228	0.0660405	1.76399	0.0500242	-0.594016	0.445374
chr11	24371050	24371299	Nooverlap	2.29367	0.0116612	2.16805	0.0174271	-0.795596	0.345881
chr11	24616400	24616599	Nooverlap	-0.753389	0.0647756	2.43547	0.00842191	-1.94722	0.258446
chr11	24630000	24630399	Nooverlap	0.314913	0.298331	2.73896	0.00368499	-1.21868	0.297818
chr11	24642800	24642949	Nooverlap	1.52341	0.0246067	2.8559	0.00267328	-0.486626	0.483572
chr11	24643200	24643849	Nooverlap	1.80479	0.0263867	3.18318	0.00104956	-1.15606	0.274344
chr11	24644100	24644649	Nooverlap	1.68882	0.0152874	2.53622	0.00638929	-0.778301	0.361775
chr11	24685700	24685899	Nooverlap	0.178483	0.840386	1.93496	0.0323433	-1.76032	0.258945
chr11	24686700	24686999	Nooverlap	-1.04126	0.0548882	2.50144	0.00703459	-2.25775	0.258446
chr11	24750200	24750449	Nooverlap	0.922485	0.139302	3.10153	0.00133444	-1.12457	0.313596
chr11	24751050	24751149	Nooverlap	-0.558761	0.204227	2.31185	0.0117964	-2.03125	0.258446
chr11	25057600	25057749	Stable	1.66204	0.0748645	1.78374	0.0476624	-0.564003	0.454021
chr11	25099950	25100349	Nooverlap	1.50882	0.416317	2.34411	0.0107968	-0.86844	0.578585
chr11	25103950	25104549	Stable	2.27261	0.0113279	2.39057	0.00952683	-1.26907	0.259776
chr11	26209850	26211199	Nooverlap	3.49856	0.0111299	4.33564	3.02172e-05	-0.530119	0.455035
chr11	26387050	26387699	Nooverlap	2.56993	0.0111299	3.61158	0.000290638	-1.01569	0.293249
chr11	26481450	26481599	Nooverlap	-0.265857	0.702603	2.49932	0.00707623	-1.92582	0.258446
chr11	26489450	26489649	Nooverlap	1.22629	0.0494485	2.0486	0.0240016	-1.32753	0.261306
chr11	26489750	26490099	Stable	2.92264	0.0111299	2.41614	0.00890093	-0.753961	0.356104
chr11	26490450	26490849	Stable	0.633868	0.196845	2.40682	0.00912228	-1.47377	0.259589
chr11	26593200	26593599	Nooverlap	2.34249	0.0119416	3.29903	0.000750838	-0.343567	0.599125
chr11	27025250	27025449	Nooverlap	2.39151	0.0148607	1.97197	0.0293807	-1.08257	0.303335
chr11	27026400	27026599	Nooverlap	1.31873	0.134978	2.37461	0.00994214	-0.21652	0.833919
chr11	28339600	28339849	Nooverlap	2.93018	0.0111365	2.85728	0.00266393	-0.369406	0.576265
chr11	28365650	28365999	Stable	2.38797	0.0111365	2.49466	0.00716824	-0.899105	0.31238
chr11	28634050	28634149	Nooverlap	-0.690644	0.451211	1.63646	0.0684082	-1.89336	0.261287
chr11	28649500	28649749	Nooverlap	0.695427	0.202166	2.49259	0.00720634	-0.795491	0.361775
chr11	28684700	28685299	Nooverlap	0.105872	0.882926	3.0856	0.00140234	-1.57052	0.281405
chr11	28685800	28685949	Nooverlap	2.20029	0.0200259	1.04255	0.244012	-0.881102	0.400097
chr11	28692550	28693149	Nooverlap	1.52446	0.0173734	2.47762	0.00751966	-0.755684	0.391636
chr11	28697400	28697899	Nooverlap	1.44712	0.116325	3.46771	0.000450993	-1.76005	0.259589
chr11	28698450	28698699	Nooverlap	0.929732	0.089245	3.08301	0.00141102	-1.31725	0.3121
chr11	28734250	28734899	Nooverlap	0.384314	0.263147	3.05765	0.00150831	-1.92442	0.258446
chr11	28735350	28735699	Nooverlap	0.601379	0.124207	2.33451	0.0110811	-1.75301	0.258446
chr11	28868700	28868949	Nooverlap	0.73607	0.0849022	2.52229	0.00663021	-0.635973	0.42013
chr11	29130350	29130599	Nooverlap	2.52336	0.0117371	1.97485	0.0291612	-0.372711	0.576416
chr11	29130800	29131299	Nooverlap	2.74197	0.0111299	2.84707	0.00273614	-0.419724	0.529154
chr11	29172850	29173799	Nooverlap	3.96875	0.0111299	4.47704	1.94827e-05	-0.613097	0.403561
chr11	29246700	29247349	Nooverlap	3.1556	0.0111299	2.78354	0.00324072	-0.198399	0.757884
chr11	29247600	29247849	Nooverlap	1.96901	0.0129769	1.9402	0.0319177	-0.332601	0.617384
chr11	29373100	29373249	Nooverlap	2.29665	0.0133432	1.46361	0.102375	-0.22005	0.734726
chr11	29373400	29374349	Nooverlap	3.18244	0.0111299	3.5643	0.000335521	-0.547109	0.439934
chr11	29514650	29515049	Nooverlap	2.82237	0.0111299	2.46955	0.00768437	0.2004	0.758903
chr11	29515250	29515399	Nooverlap	1.64764	0.112713	1.82526	0.0429136	0.00320073	0.996782
chr11	29525900	29526949	Stable	2.95326	0.0111299	3.56856	0.000330889	-0.420863	0.527716
chr11	29546950	29548449	Stable	3.8843	0.0111299	3.87641	0.000125025	-0.56242	0.439533
chr11	29692100	29692499	Stable	0.862681	0.109034	3.14218	0.00118785	-0.968923	0.301346
chr11	29692950	29694299	Stable	3.58184	0.0111299	3.88761	0.000121156	-0.575485	0.426075
chr11	30026350	30026449	Nooverlap	0.955988	0.0444381	1.38731	0.121252	0.62315	0.430294
chr11	30197450	30198749	Nooverlap	2.49789	0.0111299	2.8267	0.00289248	-0.288745	0.654514
chr11	30267500	30267999	Stable	2.31168	0.0239503	2.7376	0.0036937	-0.57833	0.429307
chr11	30404500	30404599	Nooverlap	0.259453	0.768179	1.93827	0.0320655	-2.19518	0.258446
chr11	30405100	30405249	Nooverlap	0.433778	0.178735	2.13603	0.0189817	-1.05339	0.30357
chr11	30472250	30472449	Nooverlap	1.06135	0.124654	2.96069	0.00197655	-0.0913875	0.897148
chr11	30649150	30649599	Nooverlap	3.26281	0.0111299	2.32169	0.0114718	-0.201435	0.755476
chr11	30649650	30649799	Nooverlap	1.2952	0.0289654	3.96388	9.49158e-05	-1.26768	0.259776
chr11	30771450	30773149	Nooverlap	3.07415	0.0111299	3.47896	0.000437183	-0.278098	0.667055
chr11	30872600	30872799	Nooverlap	3.14255	0.0304211	0.0789623	0.931056	1.55184	0.258945
chr11	30953500	30954799	Nooverlap	2.51561	0.0119243	3.39106	0.000567627	-0.0471178	0.944265
chr11	30985900	30986549	Nooverlap	2.60351	0.0111299	2.78096	0.00326483	-0.335272	0.607558
chr11	31592000	31592149	Nooverlap	0.637485	0.148118	1.56676	0.0807108	-0.81179	0.335587
chr11	31671300	31672149	None	2.85606	0.0111299	3.54685	0.000353737	-0.505243	0.472017
chr11	31745800	31745949	Nooverlap	0.596913	0.300456	2.07677	0.0222489	0.328092	0.631378
chr11	31786800	31786949	Nooverlap	2.67421	0.0223752	0.527571	0.557443	0.7773	0.418478
chr11	31843150	31843349	Nooverlap	2.76892	0.0111299	0.744675	0.406212	0.203067	0.753861
chr11	31844950	31845149	Nooverlap	1.54472	0.191082	0.598329	0.505361	-0.333752	0.676296
chr11	31870050	31870749	Nooverlap	2.54529	0.012881	3.38204	0.000582553	-0.898845	0.335539
chr11	31870950	31871199	Nooverlap	2.63151	0.015768	2.52928	0.00651091	-0.292439	0.660686
chr11	32205400	32205749	Nooverlap	1.77333	0.0147625	1.90089	0.0353522	0.171628	0.79679
chr11	32221000	32222249	Nooverlap	3.21451	0.0111703	3.07637	0.00143662	-0.86753	0.363926
chr11	32224600	32224699	Nooverlap	1.35529	0.0288635	1.4059	0.116388	0.130205	0.842957
chr11	32226100	32226199	Nooverlap	0.723911	0.334792	0.575029	0.522141	-0.46545	0.542555
chr11	32226350	32226949	Nooverlap	2.71491	0.0112198	3.07908	0.00142619	-0.728506	0.372025
chr11	32258650	32258799	Nooverlap	0.345017	0.298087	2.26768	0.0132916	-0.517003	0.456454
chr11	32266800	32267699	Nooverlap	3.57819	0.0111299	3.49927	0.000410836	-0.49778	0.47606
chr11	32268550	32268849	Nooverlap	1.13736	0.14386	2.6126	0.00520462	-0.639211	0.427112
chr11	32347200	32348999	Stable	2.91949	0.0111299	3.58271	0.00031681	-0.621888	0.402552
chr11	32363500	32363699	Nooverlap	1.8087	0.0135424	1.94032	0.0319115	-0.267037	0.701859
chr11	32364100	32364449	Nooverlap	2.04565	0.0156521	2.43799	0.00836875	-0.997592	0.293253
chr11	32454700	32454899	Stable	2.05305	0.0121985	2.25995	0.0135821	0.0536398	0.935554
chr11	32455100	32456149	Stable	3.73959	0.0111299	3.50685	0.000400681	-0.640968	0.389057
chr11	32622250	32622449	Nooverlap	2.75981	0.0484799	1.30225	0.145663	0.404473	0.604634
chr11	32641900	32643999	Stable	3.64922	0.0111299	4.02155	7.94965e-05	-0.60126	0.426089
chr11	32799900	32800249	Nooverlap	-0.0913592	0.740448	2.43256	0.00849383	-1.02348	0.297685
chr11	32800800	32801149	Nooverlap	0.845957	0.053489	2.60323	0.00534886	-0.811141	0.335513
chr11	32801700	32801849	Nooverlap	-0.0582684	0.950644	1.73455	0.0538673	-1.93457	0.258446
chr11	33111950	33112249	Nooverlap	0.333214	0.478314	2.55979	0.00599461	-1.17524	0.276258
chr11	33122750	33123549	Nooverlap	2.88169	0.0111299	3.54338	0.000357981	-0.600803	0.410263
chr11	33124400	33124949	Nooverlap	2.35931	0.0113127	2.47427	0.00758481	-0.272769	0.681585
chr11	33125400	33125699	Nooverlap	2.17263	0.0114768	2.92773	0.00217484	-0.774977	0.384999
chr11	33125950	33126549	Nooverlap	2.04391	0.0156328	2.61692	0.00514477	-0.838365	0.348042
chr11	33161550	33163149	Stable	3.28449	0.0111299	3.77136	0.000174153	-0.657245	0.380673
chr11	33163250	33164099	Stable	2.59641	0.0111792	3.78169	0.000168421	-0.800426	0.340164
chr11	33513050	33513849	Nooverlap	3.30218	0.0111299	3.57594	0.000323281	-0.604784	0.410318
chr11	33979000	33979249	Nooverlap	-0.613002	0.300456	2.44463	0.00822883	-2.00315	0.258446
chr11	33980000	33980249	Nooverlap	0.671224	0.320637	2.15876	0.0178602	-1.37004	0.271394
chr11	34270800	34271099	Nooverlap	1.40792	0.0498192	2.61109	0.00522661	-0.148688	0.846105
chr11	34271700	34272099	Nooverlap	1.41078	0.0467465	3.04844	0.00154634	-1.31565	0.28884
chr11	34272550	34272649	Nooverlap	1.599	0.0161001	2.01534	0.0261887	-1.24895	0.276258
chr11	34404400	34404599	Nooverlap	2.81893	0.0126996	0.61963	0.49027	1.55183	0.258446
chr11	34832650	34833699	Stable	2.99066	0.0111304	2.12505	0.0195644	-0.176812	0.788539
chr11	34903800	34903999	Nooverlap	0.456254	0.164355	3.68542	0.000231219	-0.878062	0.391768
chr11	34904550	34904799	None	0.0494638	0.967031	2.90101	0.00234802	-0.924315	0.4553
chr11	34904850	34905599	None	1.11213	0.0457578	2.41338	0.00896718	-1.61587	0.259589
chr11	34909600	34909699	Nooverlap	0.904893	0.0583579	2.13864	0.0188566	-0.954187	0.344981
chr11	35120450	35120599	Nooverlap	0.810725	0.144245	2.3605	0.010347	-0.864352	0.348732
chr11	35121050	35122049	Stable	1.72408	0.0289424	3.31171	0.000722997	-1.03758	0.299931
chr11	35210400	35210599	Nooverlap	-0.0455429	0.941106	2.09927	0.0209886	-0.994567	0.305584
chr11	35272050	35273299	Nooverlap	2.12585	0.0198209	2.80405	0.0030724	-1.03155	0.305584
chr11	35273600	35274099	Nooverlap	2.39599	0.012183	2.90307	0.0023334	-0.984904	0.320317
chr11	35274250	35274449	Nooverlap	1.85532	0.0445808	2.04865	0.0239994	-0.587998	0.442472
chr11	35275250	35275449	Nooverlap	0.976462	0.349267	2.19345	0.0162642	-0.95645	0.354413
chr11	35276500	35277149	Nooverlap	1.64626	0.0313422	2.75264	0.00353972	-0.930792	0.325052
chr11	35350400	35351399	Nooverlap	1.79978	0.0149369	2.96285	0.00196597	-1.27329	0.283051
chr11	35351650	35352449	Nooverlap	1.53108	0.0731316	3.07218	0.00145385	-1.34667	0.267982
chr11	35355950	35356499	Nooverlap	2.17653	0.0118367	2.44145	0.00829062	-0.605662	0.409741
chr11	35356650	35356849	Nooverlap	0.768642	0.146576	2.60257	0.00535036	-0.683682	0.375275
chr11	35370750	35370999	Nooverlap	2.33746	0.0365835	0.907334	0.310702	0.297927	0.667585
chr11	35384300	35384649	Nooverlap	1.16261	0.0643053	2.99712	0.00178632	-0.523941	0.462944
chr11	35385400	35385549	Nooverlap	0.694365	0.145881	1.06269	0.234988	-1.49232	0.258446
chr11	35385800	35386049	Nooverlap	1.79154	0.0620397	2.81349	0.00299387	-1.16369	0.29242
chr11	35387700	35388099	Nooverlap	1.6833	0.0176762	2.26806	0.0132807	-0.588605	0.457165
chr11	35388150	35388599	Nooverlap	2.00679	0.0677889	2.89914	0.00236059	-1.33195	0.262225
chr11	35470300	35470749	Nooverlap	1.07615	0.108414	2.88104	0.002484	-0.655497	0.397893
chr11	35768850	35769149	Nooverlap	0.902258	0.536749	2.57882	0.00569317	-1.37738	0.300224
chr11	35769350	35770449	Nooverlap	3.33276	0.0111299	4.29874	3.38679e-05	-0.67611	0.38798
chr11	35770650	35770799	Nooverlap	0.637485	0.148118	2.49716	0.00711916	-1.02032	0.288365
chr11	35834100	35834599	Nooverlap	2.6035	0.0111299	3.34051	0.000663129	-0.633702	0.410318
chr11	35838650	35838999	Stable	1.27328	0.173415	2.85573	0.00267328	-0.613765	0.464387
chr11	36364750	36364949	Nooverlap	0.882647	0.0546333	2.34657	0.0107314	-0.974137	0.326269
chr11	36550400	36550549	Nooverlap	2.74578	0.0254054	1.75242	0.0514827	-0.924006	0.327551
chr11	36677600	36678199	Nooverlap	2.94253	0.0111299	2.01589	0.0261527	-0.423062	0.525588
chr11	37031150	37031349	Stable	1.22009	0.246301	2.21916	0.0151584	-1.12514	0.308846
chr11	37031900	37032049	Stable	3.62879	0.0178971	2.12197	0.0197226	-0.410548	0.586802
chr11	37236450	37236599	Nooverlap	1.64782	0.0699433	2.55279	0.00611072	-0.318536	0.65196
chr11	37671750	37671899	Nooverlap	0.679724	0.0901693	2.72087	0.0038682	-0.420366	0.527404
chr11	37830800	37830949	Nooverlap	0.39204	0.709301	1.9096	0.0345471	-1.062	0.387957
chr11	39912750	39913049	Nooverlap	-1.29046	0.14193	2.91457	0.00225793	-3.35917	0.258446
chr11	40393750	40394099	Nooverlap	1.52004	0.0286538	2.89141	0.00241147	-0.851598	0.361578
chr11	40394400	40394549	Stable	0.123961	0.784926	1.93201	0.0325861	-0.566405	0.43581
chr11	40394750	40395599	Stable	2.32809	0.0113141	2.41583	0.0089081	-0.620781	0.456466
chr11	40396100	40396299	Nooverlap	0.128057	0.841243	3.20915	0.000974738	-0.701044	0.514906
chr11	40601250	40601649	Nooverlap	1.13854	0.121458	2.99375	0.00180399	-1.78183	0.258446
chr11	40692000	40692649	Nooverlap	2.85562	0.0111299	3.12586	0.00124483	-0.535591	0.442133
chr11	40692750	40695249	Nooverlap	3.09907	0.0111299	3.60086	0.000299098	-0.526217	0.449386
chr11	40732900	40734699	Nooverlap	2.88697	0.0111299	3.7082	0.000213573	-0.711979	0.360592
chr11	41493800	41493949	Nooverlap	0.518764	0.151864	2.21069	0.0155278	-1.35932	0.267661
chr11	41494800	41494999	Nooverlap	0.0523954	0.927456	4.02018	7.97302e-05	-1.61668	0.259252
chr11	41644900	41645249	Nooverlap	0.587917	0.284826	2.42486	0.00867976	-0.595743	0.442247
chr11	41828950	41829199	Nooverlap	1.03512	0.113602	2.25856	0.0136306	-1.83778	0.259589
chr11	43269400	43269749	Nooverlap	1.3269	0.0247105	2.84523	0.00274892	-0.51666	0.534978
chr11	43270450	43270649	Nooverlap	1.17089	0.368246	2.15294	0.0181464	-0.864555	0.414898
chr11	43426000	43426199	Nooverlap	4.16335	0.0111299	2.06393	0.0230377	-0.107762	0.872949
chr11	43426350	43426649	Nooverlap	1.73267	0.019663	1.94444	0.031598	0.0422712	0.951463
chr11	43433800	43433949	Nooverlap	1.24357	0.0445727	1.92617	0.0330964	-0.383417	0.565291
chr11	43528250	43529499	Stable	3.44112	0.0111299	3.39404	0.000562705	-0.464968	0.491442
chr11	43547950	43548399	Nooverlap	2.25434	0.0150183	2.44204	0.00828458	-0.350312	0.59692
chr11	43548600	43549099	Nooverlap	1.32237	0.0694014	3.42403	0.000515917	-0.693032	0.379626
chr11	43570150	43570549	Nooverlap	2.79366	0.0111299	2.95553	0.00200476	-0.604182	0.442641
chr11	43575250	43575949	Nooverlap	2.9598	0.0111299	2.5576	0.00603289	-0.255303	0.691652
chr11	43612900	43613199	Nooverlap	1.96539	0.0132257	1.68988	0.0600687	-0.226515	0.729636
chr11	43681250	43681549	Nooverlap	2.34768	0.0144977	3.08031	0.00142088	-0.551803	0.438618
chr11	43681900	43682849	Nooverlap	4.14189	0.0111299	6.17291	3.25734e-08	-0.979682	0.303168
chr11	43747450	43747899	Nooverlap	1.842	0.0191654	2.54234	0.00628415	-0.363278	0.587476
chr11	44469750	44471249	Stable	2.68362	0.0111299	3.38068	0.000584182	-0.706	0.378572
chr11	44518450	44520849	Stable	3.32332	0.0111304	3.76709	0.000176429	-0.765371	0.349698
chr11	44539100	44539499	Nooverlap	1.32011	0.0771548	2.74795	0.0035871	-0.161463	0.811319
chr11	44540250	44540349	Nooverlap	1.46248	0.0935971	1.191	0.183212	0.145425	0.847411
chr11	44665150	44665499	Nooverlap	2.35499	0.0111792	2.94233	0.0020809	-0.3268	0.632742
chr11	44691250	44691449	Nooverlap	1.35523	0.0282005	3.8275	0.000145613	-1.31952	0.264544
chr11	44692750	44692899	Nooverlap	2.20044	0.0205264	1.95383	0.0308248	-0.806477	0.372025
chr11	44696750	44696949	Nooverlap	1.06714	0.0540484	3.26408	0.000834055	-1.14246	0.267982
chr11	44697050	44697199	Nooverlap	3.70044	0.0111299	1.55631	0.0827338	-0.0894849	0.890172
chr11	44697450	44697599	Nooverlap	0.486776	0.147285	2.09863	0.0210195	-1.43103	0.259589
chr11	44707600	44708149	Nooverlap	2.00685	0.0122657	2.50388	0.00698146	-0.467307	0.489226
chr11	44727300	44727499	Nooverlap	-1.90954	0.0305493	2.1766	0.0170328	-2.80121	0.258446
chr11	44727750	44728249	Nooverlap	0.536752	0.126414	2.75371	0.00352898	-1.46805	0.259589
chr11	44784150	44784499	Nooverlap	2.56956	0.0491352	2.28466	0.0127006	-0.839097	0.391463
chr11	44784850	44785099	Nooverlap	1.14053	0.0518629	2.59649	0.00542597	-1.41509	0.259589
chr11	44785250	44786099	Nooverlap	2.39996	0.0181602	3.24752	0.000874248	-1.21279	0.274344
chr11	44793150	44793349	Nooverlap	0.0173739	0.951736	2.26844	0.0132674	-1.41707	0.273687
chr11	44793500	44793649	Nooverlap	-0.163905	0.583895	1.77011	0.0492565	-1.35925	0.259589
chr11	44904400	44904499	Nooverlap	0.260466	0.768469	2.7344	0.00372036	-2.01837	0.258446
chr11	45002850	45003599	Stable	1.54953	0.0218398	2.79603	0.0031347	-0.784774	0.344475
chr11	45137500	45137849	Nooverlap	0.761303	0.126324	2.59683	0.00542018	-0.524956	0.465431
chr11	45240100	45240249	Stable	0.671224	0.320637	1.75936	0.0505939	-1.64016	0.258446
chr11	45240900	45241199	Stable	0.877685	0.187588	2.73313	0.00373393	-1.55626	0.258446
chr11	45390000	45390199	Nooverlap	1.06966	0.146114	1.42011	0.112822	-0.79005	0.353414
chr11	45457200	45457449	Nooverlap	1.3948	0.030181	2.31394	0.0117236	-0.801653	0.365866
chr11	45495100	45495349	Nooverlap	-0.11397	0.893566	2.43103	0.00853018	-1.39475	0.290321
chr11	45495550	45495749	Nooverlap	1.20597	0.157682	3.19198	0.00102339	-0.744368	0.3933
chr11	45514200	45514499	Stable	1.62502	0.0205061	2.60054	0.00537523	-0.676327	0.398698
chr11	45514700	45515299	Stable	1.65069	0.0273167	2.56592	0.00589553	-0.919313	0.326026
chr11	45516200	45516299	Nooverlap	0.597932	0.126325	3.22849	0.000922171	-1.47781	0.258446
chr11	45549550	45550149	Nooverlap	1.17096	0.0721342	2.83931	0.00278941	-1.51221	0.259589
chr11	45550750	45551399	Stable	2.15091	0.0359337	2.98205	0.00186386	-1.15351	0.287813
chr11	45592000	45592249	Nooverlap	0.420543	0.596877	2.06217	0.0231429	-1.79944	0.258446
chr11	45592450	45592949	Nooverlap	1.45496	0.0321906	2.99896	0.0017787	-1.58833	0.258446
chr11	45593100	45593249	Nooverlap	0.486542	0.545655	2.21412	0.0153837	-1.863	0.258446
chr11	45593450	45593999	Nooverlap	0.240753	0.690106	2.61378	0.00518912	-1.74936	0.258446
chr11	45598600	45598699	Nooverlap	1.2966	0.0348147	2.26768	0.0132916	-1.05224	0.282929
chr11	45677950	45678249	Nooverlap	3.36547	0.0112691	1.25598	0.160572	-0.248417	0.714761
chr11	45678400	45678699	Nooverlap	0.964936	0.0601268	2.59649	0.00542597	-0.701834	0.38287
chr11	45679600	45679699	Nooverlap	3.22966	0.0114205	0.658329	0.463508	0.0784828	0.907193
chr11	45851850	45852749	Nooverlap	3.1755	0.0111299	3.88039	0.000123879	-0.751325	0.358271
chr11	45944450	45944899	Nooverlap	1.54946	0.0188711	3.15057	0.0011573	-0.93852	0.329259
chr11	45955200	45955399	Nooverlap	4.11439	0.0111299	2.41998	0.00880002	-0.539215	0.472152
chr11	45980400	45980749	Nooverlap	0.972261	0.152589	3.4576	0.000464334	-0.864555	0.336913
chr11	46213400	46213599	Nooverlap	1.16004	0.0491923	2.432	0.00850541	-1.15447	0.292961
chr11	46214150	46214849	Nooverlap	1.26049	0.0273213	2.64918	0.00471271	-1.04342	0.308846
chr11	46215000	46215149	Nooverlap	-0.690013	0.666031	2.19881	0.016026	-1.88715	0.259854
chr11	46349850	46350099	Stable	0.79103	0.332016	2.95305	0.0020166	-1.10755	0.366384
chr11	46361700	46361899	Nooverlap	0.826813	0.231328	2.17428	0.0171401	-0.66204	0.396523
chr11	46436900	46437799	Stable	3.81736	0.0111299	4.01039	8.20217e-05	-0.483366	0.48312
chr11	46925250	46925499	Nooverlap	2.00254	0.0825498	2.95718	0.00199609	-1.06539	0.333656
chr11	46939850	46940099	Nooverlap	-0.0684233	0.951504	1.94693	0.0313832	-1.18442	0.339396
chr11	47003450	47003649	Nooverlap	1.84494	0.0144082	2.05471	0.0236205	-1.30161	0.267952
chr11	47112550	47113049	Nooverlap	1.14095	0.0375423	2.72851	0.00378437	-0.641435	0.428919
chr11	47130400	47130599	Nooverlap	1.46641	0.0398047	1.89928	0.0354886	-0.568301	0.43077
chr11	47378750	47379899	Nooverlap	2.40641	0.0112008	3.38044	0.00058455	-0.516282	0.455412
chr11	48315250	48315449	Nooverlap	1.05267	0.150095	3.10795	0.00131099	-0.649623	0.433673
chr11	48753550	48753749	Nooverlap	1.90483	0.0147625	3.94012	0.00010194	-0.243974	0.715967
chr11	48799200	48799299	Nooverlap	1.06123	0.121665	1.99123	0.0279274	-0.0939709	0.907498
chr11	48799400	48801449	Nooverlap	3.052	0.0111299	3.49826	0.000411589	-0.588739	0.425789
chr11	48801750	48801899	Nooverlap	2.56582	0.0111299	2.17428	0.0171401	-0.050765	0.938579
chr11	48816300	48817449	Stable	2.65786	0.0111299	3.52573	0.000377134	-0.799706	0.34678
chr11	48826250	48826799	Nooverlap	1.99575	0.0123144	3.59619	0.000303963	-0.570951	0.421502
chr11	49202400	49204699	Nooverlap	3.78412	0.0111299	4.4	2.43637e-05	-0.493842	0.476961
chr11	49243400	49244149	Stable	2.18467	0.012117	2.49958	0.00707394	-0.753099	0.356244
chr11	49244250	49244899	Stable	2.79073	0.0127809	2.59174	0.00549833	-0.165343	0.802197
chr11	49250350	49251049	Nooverlap	2.89058	0.0111299	2.23293	0.0146133	-0.256785	0.694304
chr11	49711700	49713399	Nooverlap	4.42499	0.0111299	4.46527	1.99894e-05	-0.807792	0.339396
chr11	49713450	49713599	Nooverlap	1.01882	0.16457	1.88071	0.0372127	-0.529272	0.472191
chr11	49764400	49764749	Nooverlap	2.17248	0.0127455	2.8379	0.0028016	-0.404876	0.542117
chr11	49765050	49765249	Nooverlap	1.8189	0.0978783	2.68487	0.00427819	-0.748482	0.376611
chr11	49794250	49794899	Nooverlap	2.53452	0.0134985	3.0385	0.00158885	0.0391866	0.954448
chr11	49846800	49847399	Nooverlap	3.58635	0.0111299	2.39548	0.00940015	-0.473053	0.488222
chr11	50024950	50025949	Nooverlap	3.17309	0.0111299	3.29998	0.00074936	-0.593075	0.41957
chr11	50131250	50131799	Nooverlap	3.3505	0.011815	3.31328	0.00072149	-0.698482	0.410215
chr11	50174300	50174449	Nooverlap	1.75893	0.0145159	2.23073	0.0146978	-0.29098	0.669485
chr11	50174900	50175349	Nooverlap	3.36042	0.0120808	2.52043	0.0066684	-0.397103	0.558472
chr11	50210250	50211149	Nooverlap	2.47293	0.0147586	3.49529	0.000415549	-0.606448	0.42153
chr11	50225100	50225299	Nooverlap	2.92089	0.016048	1.86027	0.0391977	0.228004	0.732893
chr11	50225350	50225899	Nooverlap	2.15609	0.02608	2.9691	0.0019352	-0.682167	0.38971
chr11	50252200	50252299	Nooverlap	2.22071	0.0119243	3.66632	0.00024432	-0.581326	0.41651
chr11	50290450	50290699	Nooverlap	2.70085	0.0115003	0.780938	0.383433	0.420057	0.559028
chr11	50290850	50291099	Nooverlap	1.20728	0.0828008	3.21787	0.000951297	-0.956109	0.319772
chr11	50291200	50292399	Nooverlap	4.38009	0.0111299	4.07682	6.73605e-05	-0.853967	0.331861
chr11	50324750	50325699	Nooverlap	3.22112	0.0111299	4.0357	7.61836e-05	-0.698999	0.37263
chr11	50325900	50326899	Nooverlap	3.30194	0.0111299	3.49941	0.000410733	-0.684435	0.372025
chr11	50376800	50377549	Stable	2.63855	0.0111299	3.44449	0.000483284	-0.480551	0.485724
chr11	50377700	50378799	Stable	3.79586	0.0111299	4.76205	9.0528e-06	-0.812867	0.339396
chr11	50430550	50431449	Stable	3.04616	0.012478	3.60791	0.000293366	-1.01872	0.300224
chr11	50622200	50622749	Stable	3.07861	0.0111299	1.73733	0.0534919	-0.0480629	0.94201
chr11	50622950	50623149	Stable	2.20334	0.015132	2.47537	0.00756337	-0.418323	0.535459
chr11	50827150	50827799	Nooverlap	2.93486	0.0111365	2.85265	0.00269611	-0.418285	0.544141
chr11	50887250	50887549	Nooverlap	1.99752	0.0137193	1.78238	0.0477999	-0.390108	0.556269
chr11	50915600	50916199	Nooverlap	3.41815	0.0111299	3.74243	0.000191625	-0.107494	0.868408
chr11	51059150	51059549	Nooverlap	2.90212	0.0175744	2.56697	0.00587845	-0.581932	0.430779
chr11	51059700	51059899	Nooverlap	1.33744	0.0253916	2.22668	0.0148609	0.165242	0.804358
chr11	51262650	51262899	Stable	2.31882	0.0114878	2.60134	0.00536286	-0.424273	0.525251
chr11	51263100	51263999	Stable	3.74505	0.0111299	4.27838	3.58461e-05	-1.00523	0.302102
chr11	51289650	51290349	Nooverlap	1.88295	0.0128627	3.60233	0.000298351	-1.18352	0.267952
chr11	51389900	51390199	Stable	2.59796	0.0112008	2.58286	0.0056312	-0.599232	0.410492
chr11	51390800	51390999	Nooverlap	2.00257	0.0136448	2.24553	0.0141261	-0.38471	0.576038
chr11	51406100	51406499	Nooverlap	0.472144	0.262839	2.33728	0.0109915	-1.12602	0.285112
chr11	51407050	51407199	Nooverlap	0.809821	0.0874758	2.09369	0.0212783	-1.42562	0.258446
chr11	51411050	51411199	Stable	1.0005	0.0391325	2.95819	0.00199039	-0.149738	0.816951
chr11	51465900	51466099	Nooverlap	2.21983	0.0244408	1.48154	0.0982866	-0.692585	0.40152
chr11	51466900	51467099	Nooverlap	1.42402	0.0210509	2.96069	0.00197655	-0.383916	0.57409
chr11	51470350	51470549	Nooverlap	0.5947	0.153954	1.65942	0.064727	-0.732113	0.421907
chr11	51484400	51486049	Nooverlap	2.44625	0.0117371	3.43934	0.000491183	-1.16227	0.281918
chr11	51487950	51488149	Nooverlap	0.565101	0.476797	3.15387	0.00114659	-0.775026	0.399729
chr11	51488350	51488849	Stable	1.73091	0.105367	3.05176	0.00153034	-1.24052	0.293253
chr11	51502150	51502549	Nooverlap	0.631578	0.218131	3.01022	0.00172136	-0.878208	0.330477
chr11	51503450	51503599	Nooverlap	0.851828	0.544917	2.34389	0.0107968	-1.2125	0.320292
chr11	51522750	51523299	Stable	2.34407	0.0127477	3.28116	0.0007903	-1.09343	0.299678
chr11	51523350	51524399	Stable	1.49919	0.0347221	2.95514	0.00200652	-0.98014	0.33275
chr11	51533600	51533849	HH-Dependent	0.561256	0.159519	3.43474	0.000498326	-2.03746	0.258446
chr11	51541900	51542299	Nooverlap	2.13495	0.0152676	2.9775	0.00188936	-0.380832	0.574764
chr11	51542350	51543549	Stable	2.49759	0.0113034	2.90066	0.00235038	-0.841007	0.336561
chr11	51543700	51544499	Stable	1.81297	0.0144267	3.24912	0.000870325	-1.24955	0.267982
chr11	51583950	51585549	Nooverlap	3.22349	0.0111299	2.47051	0.00766349	-0.386177	0.573768
chr11	51605350	51607749	Nooverlap	4.04207	0.0111299	4.56587	1.56171e-05	-0.760029	0.353978
chr11	51615500	51615799	Nooverlap	1.32414	0.0537396	2.71426	0.00393831	-0.298245	0.707586
chr11	51616050	51616149	Nooverlap	-0.397431	0.478314	2.03657	0.0247903	-1.02833	0.327223
chr11	51619050	51619449	Nooverlap	2.45458	0.0111365	1.03737	0.246295	0.501844	0.476261
chr11	51619750	51620599	Nooverlap	3.08239	0.0111299	2.62696	0.00500562	-0.179973	0.780653
chr11	51647050	51647349	Nooverlap	1.36589	0.0212789	2.15004	0.0182891	-0.936568	0.336339
chr11	51647750	51647849	Nooverlap	-0.695958	0.70138	2.1363	0.0189676	-2.24582	0.258945
chr11	51651050	51651299	Nooverlap	3.2207	0.0111299	0.75417	0.400203	0.618286	0.442711
chr11	51688100	51688649	Nooverlap	3.36627	0.0111299	4.58079	1.50192e-05	-0.72473	0.385947
chr11	51688800	51689699	Nooverlap	2.3977	0.0118367	3.74155	0.000192138	-0.898465	0.327105
chr11	51756000	51756899	Nooverlap	2.69573	0.0111299	3.20098	0.000995157	-0.901467	0.3238
chr11	51763700	51763999	Nooverlap	2.799	0.0166172	1.71562	0.0564237	-0.301743	0.652292
chr11	51967700	51967849	Nooverlap	1.76334	0.0246793	3.57173	0.00032799	-0.402732	0.557965
chr11	51999400	52001299	Stable	3.22157	0.0111299	4.441	2.12222e-05	-0.691311	0.374083
chr11	52003450	52004149	Stable	2.68524	0.0111299	3.40818	0.000541251	-0.606894	0.423641
chr11	52004200	52004949	Stable	3.0437	0.0111299	2.61179	0.00521663	-0.39562	0.548353
chr11	52097900	52097999	Nooverlap	2.11559	0.0116612	2.40824	0.0090859	0.553212	0.465689
chr11	52098050	52098549	Stable	2.88124	0.0111299	2.08461	0.0217892	-0.287613	0.657087
chr11	52098600	52100049	Stable	4.00675	0.0111299	4.67441	1.1488e-05	-1.01019	0.298758
chr11	52231200	52231399	Nooverlap	2.40635	0.0111365	2.81013	0.00301988	-0.51452	0.45498
chr11	52231550	52232799	Nooverlap	3.49057	0.0111299	3.8683	0.000127959	-0.790216	0.356234
chr11	52282500	52283349	Nooverlap	2.31429	0.0114015	3.27574	0.000804161	-0.785863	0.350093
chr11	52287350	52287549	Nooverlap	2.07174	0.0118367	2.06067	0.0232346	0.191895	0.809708
chr11	52360300	52360899	Nooverlap	2.52331	0.0159858	2.81617	0.00297532	-0.368433	0.583938
chr11	52361050	52361899	Nooverlap	2.74391	0.0113981	3.51909	0.000384988	-0.580748	0.420704
chr11	52396350	52397349	Nooverlap	3.66936	0.0111299	4.05985	7.07054e-05	-0.667505	0.385947
chr11	52773700	52773899	Nooverlap	0.89321	0.0462973	2.1537	0.0181069	-0.611636	0.481528
chr11	53062750	53063049	Nooverlap	2.09075	0.0178665	1.79068	0.0468378	-0.54458	0.474141
chr11	53063650	53063949	Nooverlap	1.08262	0.0326387	2.79114	0.00317456	-1.21873	0.270592
chr11	53069150	53069299	Nooverlap	0.0976507	0.905105	2.51763	0.00672181	-2.23915	0.258446
chr11	53107700	53107899	Nooverlap	-0.617107	0.455038	1.8572	0.0395148	-1.18937	0.291606
chr11	53299150	53301699	Stable	3.22561	0.0111299	3.92249	0.000108212	-0.65614	0.397967
chr11	53324650	53325149	Nooverlap	3.22712	0.0111299	2.8041	0.00307221	-0.362272	0.585521
chr11	53350300	53352349	Stable	3.54976	0.0111299	4.4023	2.41227e-05	-0.645144	0.392891
chr11	53430150	53430899	Nooverlap	2.92917	0.0111299	2.87966	0.00249266	-0.43288	0.52693
chr11	53431100	53431399	Nooverlap	2.66747	0.0286804	1.8218	0.0433149	-0.127604	0.854835
chr11	53519850	53520149	Nooverlap	1.35827	0.0216067	3.01387	0.0017048	-0.821605	0.331387
chr11	53567400	53567649	None	1.20133	0.116054	3.57111	0.000328478	-0.67922	0.41043
chr11	53637450	53637849	Nooverlap	1.97222	0.0133749	2.83401	0.0028329	-1.01152	0.297885
chr11	53706400	53706599	Nooverlap	0.666006	0.307894	3.53086	0.000370016	0.0541918	0.938537
chr11	53706650	53707499	Nooverlap	2.76486	0.0111299	3.55656	0.00034421	-0.586525	0.428457
chr11	53770150	53770299	Nooverlap	0.466552	0.302136	2.55538	0.00606823	-1.50239	0.258446
chr11	53891400	53891699	None	3.4859	0.0136406	4.68572	1.1295e-05	-0.335533	0.621501
chr11	54056100	54056249	Nooverlap	1.66224	0.0764952	1.51947	0.0901208	-0.558776	0.469265
chr11	54057400	54058099	Stable	2.64313	0.0111299	2.20616	0.0157176	-0.256672	0.689935
chr11	54058500	54058799	Stable	1.54861	0.0203012	2.39355	0.00944822	0.123747	0.859622
chr11	54060000	54060299	Stable	2.18768	0.0116702	3.27552	0.000804418	-0.755231	0.35887
chr11	54060800	54061299	Stable	1.82036	0.0136406	3.25699	0.000851206	-0.537085	0.461609
chr11	54061350	54061599	Nooverlap	0.377608	0.272308	1.80742	0.0449034	-0.940024	0.304176
chr11	54067000	54067999	Nooverlap	2.04596	0.0193005	2.5871	0.00557317	-0.576014	0.430985
chr11	54068100	54069499	Nooverlap	2.59619	0.0111299	3.14761	0.00116793	-0.619809	0.410296
chr11	54113150	54113299	Nooverlap	1.47636	0.0380959	2.81012	0.00301988	-0.497738	0.474308
chr11	54113600	54113749	Nooverlap	0.986753	0.0437955	2.49716	0.00711916	-0.923968	0.305584
chr11	54126700	54127249	Nooverlap	3.28638	0.0111299	1.97502	0.0291552	-0.770315	0.365391
chr11	54127400	54127799	Nooverlap	1.69263	0.0548717	2.76495	0.00341446	-1.10548	0.288365
chr11	54437700	54438899	Nooverlap	3.22149	0.0111299	3.59272	0.000306975	-0.461886	0.498617
chr11	54522150	54522649	Nooverlap	2.16105	0.0173385	2.8718	0.00255	-0.461994	0.535278
chr11	54522850	54523399	Nooverlap	4.0433	0.0111299	3.92445	0.000107511	-0.486398	0.479433
chr11	54523650	54523849	Nooverlap	1.78865	0.0171157	1.9689	0.0296129	-0.306309	0.639503
chr11	54786450	54786599	Nooverlap	1.01369	0.0472804	2.41826	0.00884349	-0.350096	0.595947
chr11	54786800	54787699	Stable	3.64973	0.0111299	4.14943	5.35137e-05	-0.664522	0.37636
chr11	54787850	54788149	Stable	1.71689	0.024547	3.02241	0.00166348	-0.579069	0.422544
chr11	54860150	54860599	Stable	2.14756	0.0115501	2.81823	0.00295992	-0.101891	0.875817
chr11	54860800	54861299	Stable	2.11458	0.011981	3.09196	0.00137364	-0.685162	0.390559
chr11	54866250	54867199	Stable	3.84845	0.0111299	3.98087	8.9887e-05	-0.680223	0.387957
chr11	54955700	54956249	Nooverlap	2.02323	0.0151677	2.34144	0.0108686	-0.380306	0.591465
chr11	55023150	55023699	Nooverlap	2.48865	0.0112294	2.12669	0.0194729	-0.552481	0.438652
chr11	55405500	55405649	Nooverlap	-0.163965	0.5798	2.58222	0.00564109	-1.19032	0.323494
chr11	55417800	55417949	Nooverlap	1.18767	0.0282005	1.84356	0.0409387	-0.582517	0.459621
chr11	55460700	55461149	Nooverlap	3.00257	0.0111299	2.48373	0.00738853	-0.201509	0.754672
chr11	55461500	55461649	Nooverlap	2.25887	0.0566554	1.6588	0.0648175	-0.0142633	0.98522
chr11	55468600	55469199	Nooverlap	2.74507	0.0152584	3.21278	0.000964629	-0.450653	0.522628
chr11	55469650	55470599	Nooverlap	3.90047	0.0111299	4.20246	4.51438e-05	-0.466809	0.491498
chr11	55567100	55567199	Nooverlap	0.233627	0.767161	1.38731	0.121252	-0.314332	0.693349
chr11	56459400	56459599	Nooverlap	0.48473	0.426749	2.76691	0.00339363	-0.874884	0.360001
chr11	57236800	57236999	Nooverlap	1.4224	0.0600178	2.12197	0.0197226	-0.265829	0.710513
chr11	57517900	57519149	Nooverlap	2.16697	0.013197	3.43983	0.000490307	-0.659145	0.382566
chr11	57644850	57645649	Stable	2.52904	0.0112303	3.68121	0.000234858	-0.996039	0.31217
chr11	57687950	57688149	Nooverlap	0.213637	0.606874	2.37608	0.00990505	-0.756782	0.428083
chr11	57759800	57760449	Nooverlap	1.50121	0.0192468	2.81582	0.00297798	-0.621173	0.453264
chr11	57760900	57761349	Nooverlap	1.23189	0.0553526	2.59954	0.00538444	-0.913618	0.329979
chr11	57801650	57802199	Nooverlap	2.56534	0.0111299	3.35074	0.000642736	-0.805283	0.346824
chr11	57954900	57955049	Nooverlap	1.66813	0.0150971	3.1191	0.00127095	-0.605106	0.410536
chr11	57962750	57962899	Nooverlap	1.24195	0.0388385	2.40062	0.00927313	-0.473243	0.495703
chr11	58008850	58010349	Nooverlap	3.38629	0.0111299	3.90915	0.000113436	-0.635492	0.401967
chr11	58103050	58103849	Nooverlap	2.56748	0.0119048	3.15481	0.00114434	-0.504375	0.486314
chr11	58104050	58104849	Nooverlap	3.18115	0.0111299	3.37608	0.000593324	-0.560166	0.433558
chr11	58138900	58138999	Nooverlap	2.87754	0.015163	-0.581144	0.517807	0.746163	0.358327
chr11	58168100	58168599	Nooverlap	2.79909	0.0133864	2.62178	0.00507792	-0.423692	0.531885
chr11	58168650	58168799	Nooverlap	1.10023	0.131673	1.96506	0.0299165	-0.345057	0.615409
chr11	58171700	58172299	Stable	2.45564	0.0111365	2.90853	0.00229608	-0.316883	0.625374
chr11	58302700	58303199	Nooverlap	3.15271	0.0180305	2.15076	0.0182514	-0.882846	0.328846
chr11	58307200	58307399	Stable	1.47217	0.0242288	2.04127	0.0244723	-0.906004	0.3166
chr11	58322900	58323349	Nooverlap	1.61627	0.0200934	3.18966	0.00102922	-0.743036	0.385661
chr11	58323800	58324049	Nooverlap	2.09795	0.0170832	3.58172	0.000317923	-0.331019	0.61663
chr11	58329750	58331199	Nooverlap	2.96668	0.0141329	3.26051	0.000842872	-0.577809	0.459332
chr11	58437300	58437499	Nooverlap	1.41654	0.0196325	1.78525	0.0474915	-0.327847	0.664821
chr11	58437700	58438549	Nooverlap	1.77947	0.0319539	2.97261	0.00191457	-1.03701	0.297685
chr11	58509150	58509399	Nooverlap	1.80862	0.0136505	2.62944	0.00496947	-0.614297	0.424912
chr11	58801900	58802099	Nooverlap	3.67002	0.019787	0.079026	0.931056	1.09815	0.323438
chr11	58866900	58867099	Nooverlap	1.18176	0.0586763	3.29434	0.000760159	-0.304632	0.656667
chr11	58867200	58867699	Nooverlap	2.01118	0.025406	3.05563	0.00151814	-0.582729	0.424912
chr11	58903750	58904249	Nooverlap	2.96577	0.0111299	2.07892	0.0221342	-0.398956	0.554881
chr11	58904400	58904599	Nooverlap	0.831457	0.330265	2.13387	0.0190887	-0.782637	0.370226
chr11	58938250	58938899	Nooverlap	2.87327	0.0111299	3.77414	0.000172516	-0.480813	0.478381
chr11	58954650	58955499	Nooverlap	2.85476	0.0111299	3.41733	0.000526192	-0.406439	0.540513
chr11	58977100	58977899	Nooverlap	1.82424	0.0151906	2.61637	0.00515194	-0.446846	0.508
chr11	58978150	58978649	Nooverlap	2.467	0.0142755	2.68751	0.0042454	-0.599344	0.43676
chr11	59163400	59163899	Stable	2.70931	0.0111299	3.59025	0.000309339	-0.764907	0.373008
chr11	59163950	59164099	Nooverlap	2.02632	0.018927	2.02432	0.0255873	-0.550019	0.457039
chr11	59191500	59191849	Nooverlap	2.11881	0.0125721	3.53265	0.000368657	-0.263588	0.686334
chr11	59191900	59191999	Nooverlap	1.51617	0.106654	2.28863	0.0125753	-0.492901	0.503847
chr11	59192200	59192399	Nooverlap	1.36095	0.13934	1.8309	0.0422907	-0.209406	0.775294
chr11	59202150	59202299	Nooverlap	1.35366	0.0877531	1.9689	0.0296129	-0.181503	0.791267
chr11	59202550	59202999	Nooverlap	1.88082	0.0400535	3.12997	0.0012306	-0.416509	0.547327
chr11	59208000	59209099	Stable	3.28646	0.0111299	3.15021	0.0011586	-0.522253	0.463841
chr11	59227000	59227149	Nooverlap	2.29365	0.0115744	2.24893	0.0139894	-0.397586	0.548478
chr11	59227200	59228399	Stable	4.12696	0.0111299	4.80043	7.94357e-06	-1.0028	0.307015
chr11	59228450	59228699	Stable	1.75262	0.0297766	3.13852	0.00119984	-0.676436	0.411596
chr11	59336600	59336749	Stable	1.91752	0.0754599	-0.154288	0.865122	0.265072	0.711916
chr11	59449700	59450499	Stable	2.3143	0.0125476	3.42272	0.000517916	-0.857673	0.334467
chr11	59471800	59472399	Nooverlap	3.49299	0.0111299	3.12891	0.00123369	0.20951	0.745296
chr11	59505200	59506849	Nooverlap	2.63191	0.0111299	3.70301	0.000217108	-0.762488	0.3591
chr11	59662450	59663249	Nooverlap	2.97904	0.0111299	3.46979	0.000448548	-0.650901	0.381288
chr11	59809450	59810699	Nooverlap	3.93241	0.0111299	4.44254	2.12212e-05	-0.940171	0.316265
chr11	59838950	59839899	Stable	3.42348	0.0111299	4.02417	7.92054e-05	-0.980507	0.299804
chr11	59840000	59840299	Stable	2.67895	0.0111299	2.03424	0.0249357	-0.239566	0.716489
chr11	59847750	59848849	Nooverlap	2.76187	0.0171026	2.54953	0.00616116	-0.788358	0.352767
chr11	59947850	59948649	Nooverlap	3.16788	0.0111299	3.0112	0.0017173	-0.821665	0.33773
chr11	60046350	60046649	Nooverlap	1.35514	0.0257348	3.11692	0.00127821	-1.18701	0.26176
chr11	60104900	60107399	Stable	3.96844	0.0111299	4.25495	3.82266e-05	-0.837133	0.33259
chr11	60113900	60115149	Stable	3.044	0.0111299	2.45378	0.00803374	-0.397608	0.558442
chr11	60115450	60115849	Stable	2.11935	0.0237978	2.79008	0.00318288	-0.973877	0.309928
chr11	60126950	60127099	Nooverlap	1.83748	0.0640727	3.04849	0.00154619	-0.365149	0.60439
chr11	60127400	60127749	Nooverlap	1.55846	0.0614161	2.25614	0.0137184	-0.566826	0.451248
chr11	60139300	60141149	Stable	3.25043	0.0111299	3.71611	0.000208115	-0.634981	0.393596
chr11	60141400	60141699	Nooverlap	0.627965	0.0973909	2.29691	0.0122916	-1.24658	0.261112
chr11	60175050	60177599	Stable	2.62581	0.0111299	3.63717	0.000268993	-0.90428	0.317889
chr11	60183800	60184149	Nooverlap	0.806961	0.0645365	3.19965	0.000999935	-0.871074	0.324266
chr11	60209900	60210349	Stable	2.0838	0.0118244	2.75207	0.00354539	-0.055296	0.934247
chr11	60210700	60210949	Stable	2.78258	0.0111299	2.88495	0.00245299	-0.907303	0.319402
chr11	60220050	60220699	Stable	2.09377	0.0131213	3.47553	0.000442269	-1.07799	0.293249
chr11	60273150	60273499	Nooverlap	2.12208	0.0116612	2.83316	0.00283973	-0.546595	0.43614
chr11	60273600	60273899	Nooverlap	1.59217	0.0274393	3.33996	0.000664203	-0.340505	0.621182
chr11	60295300	60295599	Nooverlap	2.25888	0.0404157	4.48474	1.90561e-05	-0.127665	0.855734
chr11	60302750	60302899	Nooverlap	-0.66427	0.469439	1.7758	0.0485703	-0.62633	0.455953
chr11	60352600	60352849	Nooverlap	2.84921	0.0111365	1.87634	0.0376324	-0.000393077	0.99954
chr11	60366900	60367049	Nooverlap	2.01605	0.0120729	1.89418	0.0359495	0.401427	0.616803
chr11	60416400	60417049	Stable	2.65169	0.0113034	3.19156	0.00102434	-0.701766	0.378147
chr11	60417250	60418099	Stable	2.92116	0.0112393	3.00971	0.00172409	-0.747049	0.351488
chr11	60454600	60455249	Nooverlap	1.86074	0.0228902	2.67297	0.00442734	-0.564791	0.434854
chr11	60536300	60539349	Stable	3.00301	0.0111299	4.31089	3.25159e-05	-0.799587	0.348042
chr11	60698600	60700449	Nooverlap	2.96759	0.0111299	3.53982	0.000360971	-0.617045	0.415683
chr11	60726650	60727549	None	1.33645	0.0663126	3.06856	0.0014666	-1.06555	0.292835
chr11	60728500	60728849	Stable	2.21773	0.0199966	2.16698	0.0174726	-0.454478	0.511141
chr11	60776700	60777949	Stable	3.01503	0.0111781	2.77723	0.0032961	-0.478263	0.500462
chr11	60811000	60811149	Nooverlap	1.94814	0.0361005	2.27196	0.0131431	-0.718482	0.379197
chr11	60811350	60811699	Nooverlap	1.60028	0.0191974	2.81012	0.00301988	-0.373815	0.571813
chr11	60830600	60830899	Nooverlap	1.84142	0.0135476	2.35588	0.0104714	-0.0246704	0.976585
chr11	60831050	60831299	Nooverlap	0.824443	0.0594613	1.98531	0.0283459	-1.0875	0.280306
chr11	60878050	60879599	Nooverlap	3.30619	0.0111299	3.92563	0.000107049	-0.829583	0.339396
chr11	60895600	60895799	None	3.29667	0.0111299	2.35893	0.0103846	-0.4316	0.639923
chr11	60913450	60913799	None	1.91989	0.0289371	2.97581	0.00189784	-0.53614	0.453073
chr11	60932100	60932599	Nooverlap	1.97641	0.0303472	2.97432	0.00190574	-0.0904617	0.900871
chr11	61011850	61011999	Nooverlap	1.10833	0.0304257	3.30955	0.000727836	-0.79556	0.399581
chr11	61017400	61017599	Nooverlap	0.242158	0.827016	3.07474	0.00144203	-0.858977	0.398394
chr11	61174100	61175049	Stable	3.77901	0.0111299	3.42474	0.00051498	-0.260448	0.68587
chr11	61408050	61408199	Nooverlap	1.84205	0.019408	2.37875	0.0098425	-0.978997	0.317022
chr11	61408350	61408699	Nooverlap	2.40109	0.0112452	2.50166	0.00703195	-0.403716	0.559868
chr11	61481550	61481749	Nooverlap	2.76909	0.0115473	1.17572	0.188874	0.540281	0.472026
chr11	61483100	61483499	Stable	2.01462	0.0146134	3.23374	0.000909059	-0.388186	0.590803
chr11	61483800	61486149	Stable	2.7795	0.0111299	3.90002	0.000116149	-1.00511	0.303734
chr11	61486500	61486649	Nooverlap	1.29159	0.0243949	2.09289	0.0213131	-0.367565	0.583937
chr11	61493500	61494199	Stable	3.38141	0.0111299	3.06305	0.00148898	-0.37528	0.594393
chr11	61494450	61495299	Stable	2.0905	0.0212667	3.1173	0.00127665	-0.664889	0.382125
chr11	61504750	61505099	Stable	3.20141	0.0111299	2.24005	0.0143472	-0.455396	0.500812
chr11	61578900	61579699	Nooverlap	2.61424	0.0111299	2.9698	0.00193118	-0.338506	0.611337
chr11	61653050	61653199	Nooverlap	0.500824	0.597756	2.34432	0.0107927	-0.997626	0.336913
chr11	61761650	61762149	Nooverlap	2.49238	0.0124255	3.29405	0.00076052	-0.464609	0.495354
chr11	61854200	61855449	Nooverlap	3.00342	0.0111299	3.45954	0.000461422	-0.622758	0.408542
chr11	61929500	61930799	Stable	2.92865	0.0111299	3.93795	0.000102597	-0.954769	0.310493
chr11	62077050	62077549	Nooverlap	2.7093	0.0111299	3.60272	0.000297994	-0.431691	0.517849
chr11	62251400	62251549	Nooverlap	2.92092	0.0111299	1.57763	0.078635	0.031778	0.961869
chr11	62270950	62271149	Nooverlap	0.0465722	0.964723	1.55964	0.0820789	-0.362817	0.648283
chr11	62280900	62281899	Nooverlap	2.30619	0.0112445	3.13373	0.00121693	-0.489291	0.473587
chr11	62456450	62458799	Stable	3.54735	0.0111299	4.13698	5.56498e-05	-0.887796	0.32405
chr11	62494300	62495499	Nooverlap	2.80482	0.0125148	3.20338	0.000989074	-0.503369	0.471648
chr11	62538650	62538899	Nooverlap	1.70604	0.0146433	2.6841	0.0042884	-0.458278	0.522782
chr11	62550250	62552999	Nooverlap	4.08389	0.0111299	4.223	4.20872e-05	-0.596939	0.414683
chr11	62588500	62588599	Nooverlap	0.501527	0.599523	1.47862	0.0989514	-0.13122	0.864981
chr11	62592350	62592499	Nooverlap	0.094869	0.851683	2.60954	0.00525205	-0.893889	0.326576
chr11	62602050	62602699	Nooverlap	2.40047	0.0112008	3.2017	0.000993988	-0.38383	0.581167
chr11	62602850	62604449	Nooverlap	3.59276	0.0111299	3.6798	0.000235526	-0.502421	0.474141
chr11	62605000	62605099	Nooverlap	1.61228	0.0660405	1.36453	0.127425	0.121692	0.860795
chr11	62623200	62623349	Nooverlap	2.77844	0.0111299	1.31486	0.141872	-0.575267	0.463611
chr11	62623700	62625599	Nooverlap	2.07022	0.0262545	3.18976	0.00102902	-1.09291	0.323866
chr11	62627950	62628099	Nooverlap	1.68729	0.0191699	1.97608	0.029084	-0.430541	0.587984
chr11	62628600	62631249	Nooverlap	2.45115	0.0115539	3.27872	0.000796857	-1.1121	0.302712
chr11	62646750	62646999	Nooverlap	1.42248	0.0864082	3.21317	0.000963732	-0.169906	0.809151
chr11	62648050	62648599	Nooverlap	3.42373	0.0111299	3.73998	0.000193091	-0.465974	0.498309
chr11	62648750	62649499	Nooverlap	2.11237	0.0117954	2.98108	0.00186957	-1.09144	0.275561
chr11	62731450	62731849	Nooverlap	0.694004	0.172374	2.62363	0.0050519	-0.999903	0.295864
chr11	62741750	62741949	Nooverlap	2.43525	0.016983	2.31003	0.0118466	-0.391144	0.584165
chr11	62789050	62789499	Nooverlap	2.41879	0.0111365	2.32392	0.0114012	-0.269468	0.692983
chr11	62847300	62847499	Nooverlap	1.54453	0.018189	3.15165	0.0011545	-0.454372	0.519861
chr11	62879050	62879149	Nooverlap	1.1556	0.144114	1.90623	0.0348524	-0.569808	0.512032
chr11	62879450	62880249	Nooverlap	2.7466	0.0111299	4.20178	4.52393e-05	-0.856993	0.336561
chr11	62921400	62921649	Stable	1.92165	0.015132	1.88439	0.0368835	-0.243742	0.716817
chr11	63017050	63017349	Nooverlap	2.10268	0.0172425	1.691	0.0599099	-0.700134	0.399632
chr11	63018100	63018349	Nooverlap	1.78234	0.0405429	2.28035	0.0128426	-1.05003	0.288555
chr11	63020650	63020799	Nooverlap	1.14772	0.0317796	1.73396	0.0539451	-0.405415	0.557489
chr11	63039400	63039499	Nooverlap	1.66371	0.034283	2.03657	0.0247903	0.0827098	0.917501
chr11	63123450	63123999	Nooverlap	0.947922	0.0412324	2.72434	0.00382911	-1.08298	0.325783
chr11	63124650	63124949	Nooverlap	1.55529	0.0187091	3.0593	0.00150213	-0.412128	0.619785
chr11	63246800	63246999	Stable	0.700155	0.316196	3.00153	0.00176505	-1.46535	0.258945
chr11	63252600	63253099	Nooverlap	0.362708	0.236521	3.32478	0.000696148	-1.91073	0.258446
chr11	63253550	63253849	Nooverlap	1.31129	0.0547769	2.26112	0.0135385	-1.26789	0.269022
chr11	63299800	63300199	None	1.72824	0.0145533	2.42099	0.00877526	-1.08849	0.29242
chr11	63665100	63665299	Nooverlap	0.755707	0.0644102	2.00277	0.0270827	-1.17369	0.281547
chr11	63666000	63666149	Nooverlap	-0.172962	0.774853	2.45012	0.00809951	-1.62141	0.258446
chr11	63890000	63890149	Nooverlap	2.22083	0.0507522	-0.0687931	0.93989	0.66105	0.407134
chr11	63916950	63917799	Nooverlap	1.02942	0.0693898	2.81446	0.00298835	-1.95105	0.258446
chr11	63918100	63918549	Nooverlap	0.47456	0.204227	3.57697	0.000322301	-1.61636	0.259854
chr11	63918700	63918949	Nooverlap	1.93003	0.0147583	2.25532	0.0137494	-0.877306	0.344841
chr11	63919050	63922249	Nooverlap	2.09083	0.0118809	3.45367	0.000470221	-1.23223	0.276813
chr11	64024150	64024449	Stable	0.588698	0.201679	2.87848	0.00250084	-1.34366	0.259589
chr11	64053700	64053849	Stable	1.0263	0.0682182	2.56737	0.00587558	-1.10734	0.275858
chr11	64054050	64054349	Stable	1.17973	0.0429721	2.82629	0.0028964	-1.31394	0.259776
chr11	64079050	64079849	Stable	2.3099	0.0114089	2.59702	0.00541832	-0.692574	0.370226
chr11	64435300	64436649	Nooverlap	3.10606	0.0111299	2.80155	0.00309376	-0.696189	0.386361
chr11	64454500	64454599	Nooverlap	1.58923	0.0216115	0.795521	0.374639	-0.259384	0.704843
chr11	64587700	64587849	Stable	1.63748	0.0640741	1.85675	0.0395624	-0.58069	0.494113
chr11	64588500	64588649	Stable	1.30974	0.205863	2.06133	0.0231967	-0.893338	0.345419
chr11	64588800	64589349	Stable	1.62304	0.107356	2.44883	0.00813222	-0.987685	0.323494
chr11	64671450	64671749	Stable	0.839279	0.0524245	2.041	0.0244871	-1.35629	0.259854
chr11	64672250	64672849	Stable	1.92747	0.0265908	2.81919	0.00295358	-1.37411	0.265672
chr11	64673050	64673199	Nooverlap	0.223511	0.767474	2.47417	0.00758665	-1.24898	0.323494
chr11	64673400	64674049	Nooverlap	1.21261	0.0506143	2.6515	0.00468534	-1.34039	0.259589
chr11	64738000	64738349	Nooverlap	0.926653	0.114219	2.81136	0.00301043	-0.679348	0.47187
chr11	64738750	64739049	Nooverlap	0.240368	0.601474	2.92373	0.00220128	-1.3438	0.307769
chr11	64739150	64739399	Nooverlap	0.954771	0.188146	2.17413	0.0171476	-2.14057	0.258446
chr11	64739550	64740049	Nooverlap	-0.318041	0.3271	2.66502	0.00452055	-1.76446	0.259589
chr11	64800650	64800849	Stable	1.84501	0.0477543	1.91584	0.0339899	-1.07837	0.297285
chr11	64801200	64801699	Stable	1.2481	0.0508684	2.42774	0.00860454	-1.2489	0.277855
chr11	64833200	64833849	Nooverlap	2.03568	0.0125721	2.80224	0.00308784	-1.36351	0.273463
chr11	64834250	64834899	Nooverlap	1.47843	0.0399197	3.0562	0.00151508	-1.60604	0.258446
chr11	64835000	64835099	Nooverlap	1.95367	0.0402407	2.92061	0.0022201	-1.91238	0.258446
chr11	64899000	64899799	Stable	2.11431	0.0177922	3.1536	0.00114742	-1.20313	0.277992
chr11	64900000	64900699	Stable	1.98036	0.035738	2.79707	0.00312384	-1.19123	0.279516
chr11	64952150	64952799	Nooverlap	0.876907	0.053021	2.73673	0.0036994	-1.70369	0.258446
chr11	64953150	64953799	Nooverlap	1.24877	0.0263133	2.96971	0.00193138	-1.44637	0.259776
chr11	64957100	64957399	Nooverlap	0.951238	0.162787	2.81837	0.00295949	-1.60659	0.258945
chr11	64967650	64967799	Nooverlap	1.35155	0.155157	3.03111	0.00162191	-0.833694	0.366384
chr11	64968200	64968499	Nooverlap	1.18348	0.0272617	2.82924	0.00287164	-1.0047	0.300457
chr11	64969450	64969899	Stable	1.65385	0.0200934	2.90692	0.00230573	-1.40765	0.272107
chr11	64969950	64970249	Nooverlap	0.699958	0.312078	2.56659	0.0058853	-1.82576	0.258446
chr11	64978550	64978749	Nooverlap	2.11236	0.0125543	2.24124	0.0142982	-0.254944	0.699826
chr11	64979100	64979449	Nooverlap	1.2352	0.0323761	3.25902	0.000845842	-0.874432	0.320673
chr11	65502450	65502599	Nooverlap	0.954471	0.184976	1.94137	0.031833	-0.70734	0.440038
chr11	65504700	65505299	Nooverlap	1.04074	0.155792	2.71428	0.00393831	-1.61266	0.258446
chr11	65505500	65505649	Nooverlap	2.75019	0.0162799	2.0486	0.0240016	-1.50559	0.258945
chr11	65505700	65505999	Nooverlap	0.604763	0.103906	2.819	0.00295479	-1.48778	0.258945
chr11	65506050	65506199	Nooverlap	0.404531	0.624794	2.124	0.019615	-1.84553	0.258945
chr11	65787350	65788349	Nooverlap	3.61018	0.0111299	3.40322	0.000549036	-0.509885	0.465386
chr11	65807150	65807749	Nooverlap	2.65438	0.0195203	3.03429	0.00160924	-0.66091	0.400097
chr11	66984700	66984999	Nooverlap	1.26863	0.0562096	2.13418	0.0190742	-0.510455	0.466177
chr11	67025200	67025349	Nooverlap	1.89478	0.0370338	1.54232	0.0854963	0.210715	0.754672
chr11	67052000	67052599	Nooverlap	1.86116	0.0247532	3.17173	0.00108807	-0.647978	0.402646
chr11	67052750	67053299	Nooverlap	2.02566	0.017337	3.05929	0.00150213	-0.666101	0.393147
chr11	67545250	67545449	Nooverlap	1.10833	0.0304257	2.29284	0.0124296	0.221159	0.73591
chr11	67820750	67820999	Nooverlap	1.05029	0.0421756	3.22542	0.000930285	-1.3391	0.258945
chr11	68037250	68037349	Nooverlap	0.0976507	0.905105	2.60838	0.00527009	-1.35798	0.32237
chr11	68062550	68062999	Nooverlap	0.261455	0.400846	2.96045	0.0019773	-1.29037	0.259776
chr11	68101050	68101249	Nooverlap	0.194646	0.836588	3.53504	0.000366938	-1.24221	0.287808
chr11	68176250	68176449	Nooverlap	1.1169	0.062346	1.66646	0.0636126	-0.695862	0.389637
chr11	68188300	68188649	Nooverlap	0.983487	0.105742	3.3139	0.000719891	-0.703591	0.385873
chr11	68195250	68195749	Nooverlap	1.30445	0.080147	2.83983	0.00278531	-1.11687	0.290302
chr11	68196050	68196549	Nooverlap	1.18002	0.0371363	2.6199	0.0051055	-1.34139	0.259776
chr11	68196650	68196999	Nooverlap	0.754502	0.237207	3.15511	0.00114341	-1.30873	0.267661
chr11	68229250	68229549	Nooverlap	2.92944	0.0119984	1.96865	0.029632	-0.424324	0.533088
chr11	68229600	68229899	Nooverlap	2.23054	0.0274514	2.34292	0.0108275	-0.26479	0.696259
chr11	68386650	68386899	None	0.442871	0.45181	1.97101	0.0294466	-1.00836	0.300111
chr11	68426900	68427049	Nooverlap	1.22009	0.246301	2.40082	0.00927104	-0.901172	0.344167
chr11	68592150	68592299	Nooverlap	-0.482884	0.548306	1.76134	0.0503394	-1.09397	0.295599
chr11	68594200	68594349	Nooverlap	-0.190075	0.681269	2.98457	0.00185016	-1.05247	0.288365
chr11	68601350	68601499	Nooverlap	0.518718	0.149306	2.24893	0.0139894	-1.3976	0.258446
chr11	68603050	68603249	Nooverlap	1.10833	0.0304257	2.36129	0.0103237	-0.81922	0.364186
chr11	68612700	68613499	Nooverlap	1.37965	0.0711134	3.03966	0.00158414	-1.00638	0.309138
chr11	68637200	68637349	Nooverlap	0.603606	0.438144	1.93201	0.0325861	-0.0867611	0.905738
chr11	68637600	68639049	Stable	2.14746	0.0162188	3.11495	0.00128537	-0.702231	0.368465
chr11	68691000	68691749	Nooverlap	2.90116	0.0111299	2.93937	0.00210038	-0.461035	0.505291
chr11	68692100	68693499	Nooverlap	3.54774	0.0111299	3.57546	0.000323742	-0.348153	0.594203
chr11	68852000	68852149	Nooverlap	1.19739	0.0457242	2.24007	0.0143468	-1.16874	0.264866
chr11	68852300	68853149	Stable	2.69954	0.0111365	3.31588	0.000716116	-0.782338	0.344303
chr11	68901550	68902849	Nooverlap	3.66723	0.0111299	4.29714	3.39916e-05	-0.527886	0.456523
chr11	68911800	68911949	Nooverlap	0.726189	0.184591	1.80671	0.0449726	-0.431666	0.548717
chr11	68991900	68992049	Nooverlap	2.33178	0.030267	-0.198985	0.826269	0.491923	0.492114
chr11	69008200	69008349	Nooverlap	2.304	0.0198909	1.9247	0.0332036	-0.299698	0.658066
chr11	69011900	69012349	Nooverlap	1.63837	0.0177561	2.67531	0.00439805	-0.20601	0.748914
chr11	69015450	69016799	Nooverlap	2.67683	0.0111299	3.45015	0.000475318	-0.54978	0.452152
chr11	69035800	69035899	Nooverlap	0.598013	0.1289	3.66074	0.000248617	-0.964535	0.328429
chr11	69037150	69037449	Nooverlap	1.79992	0.0602659	2.74044	0.00366969	-0.618521	0.442641
chr11	69037650	69037799	Nooverlap	1.19728	0.0444897	1.73027	0.0543971	-0.975293	0.301346
chr11	69039500	69040349	Nooverlap	2.0643	0.0147775	2.82377	0.00291717	-0.605024	0.420067
chr11	69041500	69041649	Nooverlap	2.64391	0.015736	1.7583	0.0507266	-0.545273	0.463085
chr11	69045500	69046149	Nooverlap	3.10594	0.0111299	3.24878	0.000870981	-0.204934	0.750835
chr11	69059100	69059499	Nooverlap	1.64316	0.0154448	2.30881	0.0118848	-0.38205	0.561099
chr11	69059700	69060049	Nooverlap	1.79863	0.0136448	2.81154	0.00300873	-0.333287	0.60798
chr11	69060100	69060349	Nooverlap	2.35134	0.0363665	2.64634	0.00474872	-0.73731	0.429849
chr11	69063150	69063399	Nooverlap	2.90082	0.0119515	1.32603	0.13852	0.221569	0.73774
chr11	69063650	69064149	Nooverlap	2.21886	0.0193269	2.29995	0.0121812	-0.583121	0.433416
chr11	69070300	69071149	Nooverlap	1.74713	0.0142551	2.93906	0.00210264	-0.7101	0.371578
chr11	69072800	69073549	Nooverlap	3.01913	0.0111299	4.10093	6.25603e-05	-0.925658	0.31442
chr11	69088400	69089349	Nooverlap	3.49542	0.0111299	3.41564	0.000529665	-0.496917	0.494989
chr11	69094500	69094699	Nooverlap	1.95439	0.0209445	1.9045	0.0350146	0.167379	0.816554
chr11	69098950	69099249	Nooverlap	1.81483	0.0136414	2.35974	0.0103676	-0.189821	0.76975
chr11	69099300	69099699	Nooverlap	2.11529	0.011734	2.55252	0.00611553	0.0986167	0.87924
chr11	69123700	69123949	Nooverlap	2.77928	0.0160362	1.79813	0.045949	0.176221	0.79196
chr11	69322600	69322749	Nooverlap	-0.244294	0.386679	2.84741	0.00273409	-1.47092	0.258446
chr11	69323050	69323799	Nooverlap	2.94883	0.0112294	3.06452	0.00148327	-0.364617	0.582822
chr11	69340850	69340999	Nooverlap	0.681736	0.184685	2.34559	0.0107597	-0.827829	0.348042
chr11	69365950	69366199	Nooverlap	1.82654	0.0162009	2.38725	0.00961575	-0.710442	0.362583
chr11	69366800	69367699	Stable	2.30213	0.0112008	2.81415	0.00299037	-0.616827	0.406046
chr11	69368100	69368249	Stable	1.09468	0.107839	1.74483	0.0524819	-0.57678	0.430935
chr11	69368300	69369699	Stable	3.13168	0.0111299	3.93151	0.000104866	-0.625068	0.404272
chr11	69394850	69396599	Nooverlap	2.48848	0.0124403	3.17832	0.00106619	-0.792604	0.35995
chr11	69408050	69408399	Nooverlap	2.91302	0.0158684	2.41594	0.00890591	0.10242	0.882099
chr11	69408900	69412349	Stable	2.84235	0.0111299	3.44402	0.000483547	-0.724284	0.357221
chr11	69413050	69413199	Nooverlap	1.73088	0.015132	2.57072	0.00581954	-0.560278	0.43883
chr11	69413550	69413699	Nooverlap	0.360796	0.728947	3.27876	0.000796857	-1.11001	0.309216
chr11	69414650	69416949	Stable	3.10375	0.0111299	3.68526	0.000231284	-0.67292	0.373008
chr11	69417200	69418899	Stable	3.03018	0.0111299	3.82047	0.000148611	-0.829231	0.329274
chr11	69419200	69419499	Stable	2.7391	0.0111299	2.29489	0.0123574	0.141065	0.828003
chr11	69420100	69420349	Nooverlap	2.68397	0.0111299	0.514272	0.567525	0.34852	0.593485
chr11	69546150	69547499	Stable	2.39317	0.0111792	3.05656	0.00151364	-0.481678	0.494041
chr11	69559650	69560949	Stable	2.24074	0.0113194	3.09115	0.00137739	-0.757989	0.352767
chr11	69561050	69561449	Stable	2.10589	0.0127074	2.63122	0.00494585	-0.910065	0.320673
chr11	69561750	69562399	Nooverlap	2.83975	0.0111299	2.92497	0.00219176	-0.659415	0.400166
chr11	69563250	69563499	Nooverlap	0.312948	0.30133	2.50931	0.00688684	-1.14502	0.276258
chr11	69563800	69564099	Nooverlap	0.93771	0.0567005	2.62928	0.00497195	-0.282947	0.727741
chr11	69564600	69564849	Nooverlap	1.52779	0.096579	3.50307	0.000406098	-0.733639	0.370864
chr11	69565200	69565349	Nooverlap	0.568793	0.665469	2.73515	0.00371342	-0.924717	0.369936
chr11	69578650	69579199	Nooverlap	2.56995	0.0111299	3.38189	0.000582598	-0.357899	0.612388
chr11	69579750	69582049	Stable	3.29417	0.0111299	3.70966	0.000212873	-0.713664	0.370864
chr11	69621650	69621849	Nooverlap	2.43308	0.0111365	2.49475	0.00716631	0.0117038	0.987209
chr11	69622150	69622499	Nooverlap	2.28919	0.011246	2.22987	0.0147359	-0.442698	0.509869
chr11	69632800	69633799	Stable	3.19938	0.0111299	4.62708	1.28162e-05	-0.959728	0.3163
chr11	69661650	69663449	Stable	2.92541	0.0111299	3.67848	0.00023633	-0.850493	0.342944
chr11	69670800	69672349	Stable	3.80383	0.0111299	4.36483	2.73796e-05	-0.799006	0.339404
chr11	69681150	69681949	Stable	2.76585	0.0111299	3.77692	0.000170887	-0.62623	0.421846
chr11	69682000	69682549	Stable	2.37404	0.0111506	2.8226	0.00292598	-0.350066	0.598816
chr11	69683100	69683299	Nooverlap	2.39189	0.019257	1.701	0.0584932	0.248582	0.72751
chr11	69695800	69696049	Nooverlap	1.52833	0.0616579	2.39079	0.00952047	-0.177032	0.795204
chr11	69714750	69715749	Nooverlap	2.24036	0.0205331	2.15183	0.0181995	-0.432931	0.583147
chr11	69757750	69759399	Stable	3.01712	0.0111299	3.47285	0.000445668	-0.706977	0.364928
chr11	69759500	69759899	Nooverlap	1.65245	0.0156483	2.80437	0.00306989	-0.321556	0.633808
chr11	69765950	69766149	Nooverlap	2.86531	0.0586104	1.02604	0.251563	-0.00897388	0.991681
chr11	69800450	69800749	Stable	2.56598	0.014049	1.89206	0.0361545	-0.24316	0.714891
chr11	69837400	69837649	HH-Sensitive	2.30281	0.02204	1.88648	0.0366773	0.266598	0.716267
chr11	69837950	69838349	HH-Sensitive	2.78346	0.0130707	3.02744	0.00163894	-0.535002	0.455611
chr11	69838550	69838999	HH-Sensitive	1.98632	0.026735	2.4021	0.00924436	-0.0680305	0.920346
chr11	69845800	69847349	Stable	3.23077	0.0111299	3.39735	0.000557401	-0.374768	0.568335
chr11	69880800	69880999	Nooverlap	2.53046	0.0334265	1.78433	0.0475975	0.351472	0.63009
chr11	69900300	69902749	Stable	2.79996	0.0111299	3.82187	0.000147954	-0.670467	0.374619
chr11	69913600	69914599	Nooverlap	3.07181	0.0111299	3.65603	0.000252592	-0.597209	0.432546
chr11	69919850	69921399	Stable	3.7568	0.0111299	4.44797	2.11032e-05	-0.861024	0.323682
chr11	69921750	69922249	Stable	1.91735	0.0144082	2.99405	0.0018027	-0.29385	0.669692
chr11	69935350	69935549	Stable	2.44924	0.0122568	0.384427	0.66978	0.562697	0.449174
chr11	69935950	69936149	Stable	2.26744	0.0206776	1.87438	0.0378028	0.979507	0.309572
chr11	69947400	69947549	Nooverlap	1.40469	0.164121	2.77889	0.0032831	-1.09464	0.299897
chr11	69947900	69949049	Nooverlap	2.95	0.0111299	3.89265	0.000119288	-0.484895	0.477427
chr11	69979750	69981799	Stable	3.12877	0.0112008	4.00713	8.26751e-05	-0.780844	0.349904
chr11	69991100	69992199	Stable	2.60458	0.0111299	2.65819	0.00460052	-0.540577	0.45401
chr11	69995200	69997749	Stable	3.77624	0.0111299	3.79638	0.000160969	-0.629527	0.398747
chr11	70000550	70001249	Stable	2.72024	0.0111299	3.28369	0.000785416	-0.668252	0.376682
chr11	70018300	70019149	Nooverlap	2.29963	0.0112008	3.9127	0.000112078	-0.438672	0.511358
chr11	70020200	70020449	Nooverlap	2.07647	0.0120961	3.5215	0.000381943	0.175754	0.795022
chr11	70020900	70021499	Stable	2.918	0.0112008	2.73025	0.00376452	-0.34529	0.607005
chr11	70021650	70022199	Stable	1.92752	0.0141856	2.99721	0.00178595	0.119592	0.858616
chr11	70028800	70029249	Nooverlap	2.12797	0.0137253	2.54994	0.00615427	-0.455133	0.506295
chr11	70029950	70030199	Nooverlap	1.8533	0.0200259	2.61141	0.00522312	-0.145138	0.825921
chr11	70220650	70220849	Stable	1.34271	0.0517589	2.29807	0.012253	-0.748842	0.357221
chr11	70221350	70221549	Stable	1.88881	0.0175499	1.94108	0.0318578	-0.413687	0.565728
chr11	70223550	70223699	Nooverlap	-1.35336	0.368516	1.27515	0.154219	-1.42314	0.294671
chr11	70232250	70232399	Nooverlap	0.416537	0.190623	2.22668	0.0148609	-0.568496	0.430628
chr11	70232700	70233299	Nooverlap	1.87892	0.0334984	2.70896	0.00399722	-0.671112	0.394176
chr11	70237150	70237899	Nooverlap	3.11504	0.0114089	3.13093	0.00122761	-0.719659	0.379171
chr11	70238050	70238699	Nooverlap	2.16283	0.0118159	2.83806	0.00280082	-0.669368	0.387517
chr11	70239450	70240249	Stable	3.5421	0.0158563	3.30879	0.000729649	-0.745024	0.370068
chr11	70409400	70410449	Stable	2.57153	0.0111299	4.17836	4.86028e-05	-0.727876	0.359411
chr11	70431750	70431949	Nooverlap	3.30341	0.0111299	0.97649	0.275145	-0.0309876	0.962823
chr11	70432550	70433149	Stable	2.67417	0.0111299	1.85286	0.0399642	-0.0518182	0.937556
chr11	70451900	70452249	Stable	2.23695	0.015811	3.48622	0.000427915	-0.608214	0.459332
chr11	70524900	70525099	Nooverlap	0.665842	0.303494	2.42925	0.00857055	-0.761737	0.372025
chr11	70525300	70525899	Nooverlap	2.72194	0.0111299	3.2016	0.000993988	-0.541748	0.453638
chr11	70562250	70562399	Stable	0.911902	0.436316	2.34812	0.0106936	-0.194575	0.813648
chr11	70562550	70563799	Stable	2.36177	0.0114089	3.00766	0.00173361	-0.814638	0.339396
chr11	70646250	70646999	Nooverlap	3.16741	0.0111299	2.39956	0.00929757	-0.290127	0.658665
chr11	70647250	70648099	Nooverlap	3.07725	0.0111299	3.04402	0.00156478	-0.50092	0.48047
chr11	70653100	70656749	Stable	3.16294	0.0111299	3.95916	9.58689e-05	-0.784239	0.348377
chr11	70656950	70657149	Stable	2.09682	0.0145113	2.68042	0.00433502	-0.901671	0.32864
chr11	70657300	70657749	Nooverlap	1.68866	0.0218517	2.70499	0.00403923	-0.732737	0.37928
chr11	70668250	70668699	Nooverlap	2.16765	0.0311975	2.62604	0.00501775	-0.512251	0.494596
chr11	70668950	70670149	Stable	3.27554	0.0111299	3.34472	0.000655178	-0.434857	0.540491
chr11	70687650	70688349	Stable	1.95867	0.0128494	2.89181	0.00240809	-0.160306	0.815669
chr11	70700200	70700949	Nooverlap	2.35996	0.0181685	3.25954	0.000844868	-0.481068	0.526558
chr11	70764050	70764299	Nooverlap	2.59938	0.0111299	1.48204	0.0981855	-0.162811	0.802239
chr11	70764400	70764699	Nooverlap	0.846392	0.0616286	2.9261	0.00218569	-0.671086	0.383075
chr11	70844750	70845549	Nooverlap	3.66408	0.0111299	3.52366	0.000379643	-0.793898	0.348042
chr11	70969200	70969999	Nooverlap	2.72113	0.0111299	3.33492	0.00067452	-0.842943	0.336913
chr11	70970100	70970699	Nooverlap	2.645	0.0111299	2.35512	0.0104861	-0.62549	0.395838
chr11	70982150	70983099	Nooverlap	2.74706	0.0111299	2.98576	0.00184478	-0.540034	0.441392
chr11	71003750	71004399	Nooverlap	2.42726	0.0141083	2.90308	0.0023334	-0.977838	0.315958
chr11	71018650	71019299	Stable	3.21392	0.0111299	3.46621	0.000452777	-0.412439	0.534814
chr11	71019500	71020349	Stable	3.19527	0.0111299	4.1769	4.88266e-05	-0.734202	0.358327
chr11	71032800	71033499	Nooverlap	2.2545	0.0115867	2.89545	0.00238253	-0.52491	0.448802
chr11	71033750	71034099	Nooverlap	2.85284	0.0255748	2.19343	0.0162647	-0.432435	0.548522
chr11	71792200	71792449	Nooverlap	0.875394	0.237939	2.44281	0.00826984	-0.731395	0.397935
chr11	71886650	71887099	Nooverlap	1.72646	0.0480858	2.57859	0.00569658	-0.635339	0.476744
chr11	71887700	71888049	Nooverlap	1.36191	0.0220443	2.50029	0.00706078	-0.816382	0.36743
chr11	72041950	72042249	Stable	2.57006	0.0120288	2.59109	0.00550764	-0.38245	0.564682
chr11	72042550	72042849	Stable	2.53154	0.0111299	2.45069	0.00809033	-0.237216	0.74158
chr11	72043000	72043249	Nooverlap	3.11702	0.0140117	1.37282	0.125163	0.77093	0.356348
chr11	72206600	72207449	Stable	2.51403	0.0139183	2.75952	0.00346906	-0.409328	0.560999
chr11	72207600	72207949	Stable	2.89232	0.0111299	2.77405	0.00332603	-0.243147	0.707486
chr11	72214450	72215149	Nooverlap	2.90127	0.0111299	3.67389	0.000239216	-0.930431	0.305584
chr11	72215200	72215449	Nooverlap	1.5716	0.0203666	2.07273	0.0224954	-0.655696	0.385371
chr11	72361950	72362199	Stable	2.1527	0.0117371	2.85728	0.00266393	-0.184798	0.774021
chr11	72440900	72441999	Nooverlap	2.84866	0.0111299	2.88225	0.00247505	-0.627926	0.400756
chr11	72606650	72606799	Nooverlap	0.922485	0.139302	1.9425	0.0317561	-0.371159	0.591312
chr11	72607000	72608849	Stable	3.87968	0.0111299	4.4465	2.11192e-05	-0.77167	0.343349
chr11	72688700	72688849	Nooverlap	1.27326	0.0564336	1.85795	0.0394426	-0.710741	0.386299
chr11	72689300	72690549	Nooverlap	3.55725	0.0111299	3.2115	0.000967737	-0.400337	0.549604
chr11	72795250	72796399	Stable	3.05976	0.0111299	3.64554	0.000260687	-0.583304	0.418528
chr11	73047900	73048499	Nooverlap	3.80429	0.0111299	3.82345	0.000147167	-0.970095	0.327584
chr11	73085250	73085499	Nooverlap	2.36964	0.0127935	2.25261	0.0138536	-0.325277	0.646364
chr11	73137700	73138399	Nooverlap	2.55089	0.0112008	4.55881	1.57879e-05	-0.42116	0.5392
chr11	73176200	73177049	Stable	2.6464	0.0111299	3.83764	0.00014113	-1.13458	0.275391
chr11	73177200	73178199	Stable	2.65029	0.0122029	3.35485	0.000635055	-0.68709	0.371372
chr11	74649450	74650199	Stable	2.58574	0.0168437	3.39556	0.000560554	-0.392423	0.565436
chr11	74723000	74724999	Stable	3.35969	0.0111299	4.29626	3.40732e-05	-1.01775	0.300062
chr11	74770050	74770549	Nooverlap	0.782861	0.130895	2.60191	0.00535659	-0.552672	0.43883
chr11	74770800	74771549	Nooverlap	2.75204	0.0114614	3.2987	0.00075138	-0.49213	0.474156
chr11	74829900	74832099	Stable	3.2998	0.0111299	3.58279	0.000316767	-0.378438	0.596418
chr11	74832500	74833199	Nooverlap	2.9	0.0111299	2.26891	0.0132541	0.0568931	0.933436
chr11	74837600	74837749	Nooverlap	1.58285	0.0363755	1.82903	0.0424987	0.0143666	0.983588
chr11	74837900	74838749	Stable	3.11601	0.0111299	3.81059	0.000153962	-0.518993	0.453585
chr11	74896750	74897099	Nooverlap	2.5751	0.0173351	2.7818	0.00325649	-1.01164	0.293249
chr11	74897300	74898649	Nooverlap	2.53954	0.0111365	3.29388	0.000760899	-0.835517	0.336316
chr11	74925400	74925649	Stable	1.9534	0.0236822	2.8834	0.00246573	-0.410218	0.552238
chr11	74925750	74926549	Stable	2.93012	0.0111299	3.75566	0.000183161	-0.638942	0.390133
chr11	74926650	74926849	Nooverlap	-0.560036	0.68387	2.21066	0.0155278	-1.80201	0.259589
chr11	75013600	75013949	Nooverlap	0.789519	0.0628113	2.75171	0.00354966	-1.38742	0.258446
chr11	75014000	75014149	Nooverlap	1.87596	0.0285278	2.35337	0.0105343	-0.29659	0.662752
chr11	75050150	75050549	HH-Sensitive	0.636901	0.434657	2.61415	0.00518432	-1.04753	0.30357
chr11	75051200	75051349	Nooverlap	1.22374	0.0253374	2.91443	0.00225867	-0.537938	0.446719
chr11	75073800	75073949	Nooverlap	2.51231	0.0271159	2.81914	0.00295392	-0.0272705	0.97009
chr11	75074200	75074399	Nooverlap	1.56854	0.016622	2.00346	0.0270337	-0.394048	0.558926
chr11	75139150	75139349	Nooverlap	0.992613	0.176827	1.98626	0.0282762	-0.157625	0.819806
chr11	75139950	75140199	Nooverlap	1.88453	0.0131416	2.09258	0.0213286	0.0911381	0.888694
chr11	75146850	75148449	Stable	1.93719	0.0125096	2.91768	0.0022382	-0.992202	0.313596
chr11	75178200	75178799	Nooverlap	3.0559	0.0111299	2.78619	0.00321682	-0.70863	0.373444
chr11	75178850	75178999	Nooverlap	2.1477	0.029054	1.78433	0.0475975	-0.0312931	0.965284
chr11	75262900	75263049	Nooverlap	1.95472	0.0829787	2.01918	0.0259379	-0.985664	0.339404
chr11	75263450	75263799	HH-Dependent	1.81898	0.0271363	2.61987	0.00510576	-1.09192	0.289779
chr11	75264150	75264699	HH-Dependent	1.55205	0.0191153	3.08408	0.00140704	-0.933852	0.366384
chr11	75347450	75348299	Nooverlap	1.6888	0.0149595	2.71624	0.00391994	-0.529434	0.451303
chr11	75348450	75348849	Nooverlap	1.51362	0.0309791	2.64264	0.0047989	-0.558237	0.454738
chr11	75421700	75422549	Nooverlap	2.67818	0.0111299	3.24309	0.000885594	-0.29034	0.653765
chr11	75454400	75454599	Nooverlap	2.79366	0.0111299	1.03801	0.246011	1.05411	0.278661
chr11	75460150	75461249	Stable	1.88405	0.019663	3.12705	0.00124044	-1.13205	0.276977
chr11	75461800	75461949	Nooverlap	2.70583	0.0247955	1.68099	0.0614178	0.898779	0.357555
chr11	75486750	75487899	Nooverlap	2.71147	0.0147625	3.59206	0.000307466	-0.868892	0.343349
chr11	75531000	75532199	Stable	2.66229	0.0111299	2.84005	0.00278358	-0.490903	0.47078
chr11	75588100	75588949	Nooverlap	2.58378	0.0112294	2.88366	0.00246392	-0.738063	0.365801
chr11	75630500	75630699	Stable	1.60315	0.0170832	2.2041	0.0157927	-1.16522	0.26329
chr11	75655700	75655899	Nooverlap	1.15136	0.0348147	2.37279	0.00999203	0.0635174	0.924158
chr11	75679150	75680049	Stable	3.85681	0.0111299	4.37694	2.64145e-05	-1.02063	0.295599
chr11	75732400	75732749	Stable	3.03956	0.0111299	2.70087	0.00408606	-0.612252	0.400775
chr11	75732800	75734249	Stable	4.48377	0.0111299	5.08875	4.28805e-06	-0.914052	0.326269
chr11	76027200	76027799	Nooverlap	2.51951	0.0111299	3.6179	0.000285536	-0.67602	0.379626
chr11	76083700	76083899	Nooverlap	1.46364	0.0675253	2.36896	0.0100979	-1.04707	0.304898
chr11	76179450	76179599	Nooverlap	1.89181	0.0226934	2.60195	0.00535659	-0.430573	0.526273
chr11	76202100	76202549	Nooverlap	2.67794	0.0121415	2.56852	0.00585459	0.150294	0.827329
chr11	76216750	76217599	Nooverlap	3.18236	0.0111299	3.31645	0.000715098	-0.838267	0.328027
chr11	76243300	76243599	Nooverlap	3.01605	0.0111299	2.74283	0.0036395	-1.00693	0.310416
chr11	76243800	76244399	Nooverlap	1.75901	0.0193548	2.7462	0.00360473	-0.942998	0.308846
chr11	76255600	76255899	Stable	1.58061	0.017175	2.11513	0.0201027	-1.01236	0.298706
chr11	76255950	76256149	Stable	2.32295	0.0246793	2.17295	0.0172028	-0.973994	0.305584
chr11	76256550	76256749	Stable	1.9029	0.019175	1.80648	0.0449981	-0.34318	0.607683
chr11	76256950	76257049	Nooverlap	1.34218	0.0708537	1.58414	0.0774516	-0.368028	0.593125
chr11	76279050	76279199	Nooverlap	2.01234	0.0134837	-0.289614	0.748665	1.60042	0.258446
chr11	76293250	76293349	Nooverlap	1.89051	0.0494236	2.14584	0.0184835	-0.0745009	0.915418
chr11	76309400	76309549	Stable	1.40171	0.120949	2.7784	0.00328476	-0.790256	0.358271
chr11	76310200	76310599	Stable	1.52046	0.0189991	2.41737	0.00886749	-0.711363	0.380983
chr11	76310650	76310849	Nooverlap	3.52563	0.0116702	1.67319	0.0625696	0.0312633	0.96547
chr11	76319500	76319649	Nooverlap	2.05894	0.0151677	2.07628	0.0222739	-0.459643	0.499132
chr11	76323700	76324499	Nooverlap	1.33914	0.0216746	2.97653	0.00189404	-0.754448	0.353026
chr11	76325400	76325549	Nooverlap	1.21646	0.0366535	2.21233	0.015459	-0.409432	0.560098
chr11	76342700	76343749	Stable	2.15212	0.011563	2.96042	0.00197734	-0.784239	0.339504
chr11	76351450	76351599	Nooverlap	2.08602	0.102668	3.90111	0.000115928	-0.0237782	0.976825
chr11	76363150	76363699	Nooverlap	1.3814	0.0217268	3.13027	0.00122942	-0.463927	0.494989
chr11	76384650	76385099	Nooverlap	0.311264	0.572776	3.02461	0.00165234	-1.78363	0.258446
chr11	76398200	76399149	Nooverlap	2.10057	0.0122299	2.99507	0.001797	-0.523626	0.456686
chr11	76406350	76406499	Stable	0.433778	0.178735	2.2811	0.0128115	-0.79285	0.344981
chr11	76406900	76407499	Stable	2.61972	0.0111299	2.28641	0.0126483	-0.151817	0.824722
chr11	76429450	76430849	Stable	2.70626	0.0111299	3.07646	0.00143651	-0.537851	0.439912
chr11	76445750	76446049	Nooverlap	1.09958	0.0714813	2.44555	0.00820743	-0.51561	0.461873
chr11	76447650	76447749	Nooverlap	0.501527	0.599523	1.87905	0.0373671	-1.09796	0.320919
chr11	76449650	76449799	Nooverlap	2.28608	0.0137628	1.91587	0.0339876	-0.331336	0.62006
chr11	76450000	76450299	Nooverlap	2.32218	0.0205846	1.81605	0.0439239	-0.364947	0.600942
chr11	76482850	76483099	Nooverlap	2.53414	0.0147011	0.573881	0.522981	0.458145	0.506201
chr11	76494150	76494449	Stable	2.09481	0.017635	2.68261	0.00430941	-0.949219	0.305584
chr11	76494550	76495249	Stable	2.25796	0.011563	2.54311	0.00627371	-0.899874	0.318797
chr11	76525700	76525849	Stable	0.309785	0.427	2.12657	0.019479	-0.98278	0.319043
chr11	76526350	76526549	Stable	1.02616	0.357212	2.02275	0.0256875	-0.562857	0.503769
chr11	76571000	76571399	Stable	1.77041	0.0167113	3.02729	0.00163968	-0.547418	0.435809
chr11	76623250	76623799	Nooverlap	2.60374	0.0111299	3.81976	0.000148892	-0.380004	0.582742
chr11	76646550	76646849	Stable	1.25823	0.0260748	1.80876	0.0447534	-0.58369	0.44538
chr11	76647250	76647499	Stable	2.72912	0.0111703	2.49251	0.00720745	-0.377717	0.591844
chr11	76763150	76763649	Nooverlap	2.50773	0.0115902	3.17572	0.0010759	-0.73726	0.374276
chr11	76846550	76846949	Nooverlap	1.83402	0.0725121	3.79441	0.000162224	-1.12436	0.3066
chr11	76913300	76913449	Nooverlap	-0.260257	0.361322	1.63943	0.0679269	-0.343821	0.5998
chr11	76945150	76946149	Stable	2.59432	0.0111299	3.33428	0.000675827	-0.529412	0.453934
chr11	76946350	76946449	Stable	0.966383	0.0964959	2.1528	0.0181474	-0.0336675	0.961229
chr11	77077650	77078849	Nooverlap	3.29149	0.0111299	3.35242	0.000639552	-0.669642	0.391659
chr11	77215600	77216899	Stable	2.28965	0.0114249	3.52347	0.000379832	-0.873797	0.339396
chr11	77217100	77217249	Nooverlap	1.21646	0.0366535	1.95937	0.0303755	-0.156472	0.816463
chr11	77293450	77293549	Nooverlap	2.51382	0.0112008	2.94766	0.00205025	-0.253011	0.698059
chr11	77297000	77297349	Nooverlap	1.51145	0.113202	3.41145	0.000535278	-1.21458	0.293253
chr11	77297550	77298299	Nooverlap	1.47083	0.0263628	3.71472	0.000209277	-1.3089	0.282878
chr11	77298400	77298549	Nooverlap	2.79241	0.0121567	1.91348	0.0341943	-1.35468	0.275391
chr11	77298600	77298899	Nooverlap	2.79513	0.0118941	1.82269	0.0432103	-0.698006	0.415663
chr11	77348350	77348499	Nooverlap	1.98676	0.0131604	1.53595	0.0867436	0.31539	0.629525
chr11	77488950	77489099	Nooverlap	1.80858	0.142649	2.97112	0.00192315	-0.576092	0.480603
chr11	77489150	77490199	Nooverlap	3.02195	0.0111299	2.80376	0.00307396	-0.264192	0.684874
chr11	77491600	77492549	Nooverlap	2.24529	0.0115003	2.8588	0.00265202	-0.64179	0.387517
chr11	77492750	77493299	Stable	2.41815	0.0111743	3.06217	0.00149205	-0.427229	0.522378
chr11	77493450	77494449	Stable	3.29506	0.0111299	2.99817	0.00178144	-0.594054	0.426075
chr11	77497050	77497299	Nooverlap	2.20334	0.015132	2.15256	0.0181594	-0.605183	0.490003
chr11	77497850	77498199	Nooverlap	2.22948	0.0271159	2.28959	0.0125464	-1.28971	0.264544
chr11	77508400	77508699	Nooverlap	3.38008	0.0159254	1.07598	0.229122	0.107069	0.876099
chr11	77513000	77513249	Nooverlap	2.43838	0.0152676	0.496176	0.581384	0.830391	0.332655
chr11	77538050	77538149	Nooverlap	3.08494	0.0111299	0.965116	0.28082	1.17439	0.262225
chr11	77606750	77608199	Nooverlap	3.43385	0.0111299	4.35056	2.87639e-05	-0.80113	0.350147
chr11	77685450	77685949	Nooverlap	1.06344	0.035698	2.66369	0.00453737	-0.77131	0.354788
chr11	77686150	77687999	Stable	3.93691	0.0111299	4.65399	1.23203e-05	-0.814496	0.342132
chr11	77763250	77763799	Nooverlap	2.5468	0.0111299	3.47455	0.000443244	-1.08232	0.288805
chr11	77766400	77766849	Nooverlap	2.42424	0.0111365	2.81525	0.0029813	-0.545579	0.451431
chr11	77793700	77793849	Nooverlap	0.678286	0.121869	1.87549	0.0377164	-0.0469514	0.945906
chr11	77913550	77913699	Nooverlap	0.194646	0.836588	1.78118	0.0479408	-1.40571	0.271987
chr11	77981900	77982449	Stable	2.34484	0.0130207	2.92936	0.00216442	-0.605535	0.414669
chr11	77982650	77985349	Stable	3.413	0.0111299	3.69206	0.000225757	-0.606603	0.404709
chr11	78032350	78032749	Stable	2.07113	0.0167542	2.78597	0.0032187	-0.225055	0.758379
chr11	78038050	78038199	Nooverlap	1.84212	0.0198573	2.87889	0.0024975	-0.757211	0.349298
chr11	78062050	78062199	Nooverlap	0.345098	0.301664	2.45386	0.00803259	-0.703097	0.36399
chr11	78080100	78080249	Nooverlap	2.14773	0.0120247	2.30997	0.0118466	-0.776568	0.344707
chr11	78094700	78095149	Nooverlap	2.97678	0.0111299	2.38703	0.00962192	-0.145953	0.82375
chr11	78114750	78115449	Stable	1.94177	0.0225877	2.99688	0.00178685	-0.566017	0.430395
chr11	78115700	78116149	Stable	1.67094	0.0293199	2.68575	0.00426764	-0.446042	0.513418
chr11	78163400	78165599	Stable	3.50078	0.0111299	4.10167	6.24815e-05	-0.74336	0.352767
chr11	78165800	78165999	Nooverlap	1.7765	0.0229509	2.50501	0.00696779	-0.153748	0.817129
chr11	78176400	78176999	Nooverlap	2.61594	0.0111299	2.95355	0.00201422	-0.602958	0.427024
chr11	78178100	78179349	Stable	2.39025	0.0111365	3.10073	0.00133764	-0.336262	0.605143
chr11	78182450	78182649	Nooverlap	1.3315	0.132674	2.03626	0.0248092	-0.854486	0.355566
chr11	78182700	78183599	Nooverlap	2.94199	0.0111299	3.42593	0.000513567	-0.651369	0.404466
chr11	78188150	78189849	Stable	3.13963	0.0111299	3.605	0.000296135	-0.668123	0.400775
chr11	78245300	78246199	Stable	2.89429	0.0111299	3.36608	0.000614146	-0.837036	0.34724
chr11	78261700	78262449	Stable	2.73353	0.0111299	3.79306	0.000162489	-0.923522	0.313596
chr11	78301600	78302149	Nooverlap	2.59634	0.0118708	3.54023	0.000360402	-0.621885	0.398136
chr11	78328500	78328849	Nooverlap	2.50096	0.0117433	1.91436	0.0341162	0.147005	0.821989
chr11	78343400	78344099	Nooverlap	3.4427	0.0111299	2.80599	0.00305533	-0.254236	0.698717
chr11	78465600	78466099	Nooverlap	2.46076	0.0114882	4.08168	6.64519e-05	-0.703674	0.370083
chr11	78466700	78466799	Nooverlap	0.129977	0.670346	2.52125	0.00665053	-0.77049	0.375544
chr11	78511600	78512999	Nooverlap	3.23897	0.0111299	3.52003	0.00038381	-0.719253	0.370283
chr11	78535850	78536199	Stable	2.57306	0.0114089	3.29517	0.000758204	-0.422921	0.536122
chr11	78536450	78536899	Stable	1.58023	0.0395961	2.92712	0.00217916	-1.07231	0.295491
chr11	78550100	78550699	Nooverlap	2.14201	0.0123264	3.3181	0.000711374	-0.537669	0.465037
chr11	78696800	78697449	Nooverlap	2.96385	0.0119184	2.93605	0.00212098	-0.423812	0.540314
chr11	78697650	78697949	Nooverlap	2.793	0.0112953	2.47031	0.00766684	-0.146106	0.831655
chr11	78751350	78751699	Nooverlap	1.80696	0.0148053	2.96461	0.00195697	-0.621802	0.399463
chr11	78972600	78972749	Nooverlap	2.72069	0.0111299	2.23532	0.0145318	-0.883968	0.355037
chr11	78973200	78973449	Nooverlap	0.576328	0.461917	2.23568	0.0145207	-1.32674	0.266648
chr11	79146050	79146299	Nooverlap	2.14172	0.0144977	1.4591	0.103457	-0.44137	0.512596
chr11	79224700	79224849	Nooverlap	1.6557	0.0159577	0.522301	0.561405	0.160134	0.816746
chr11	79229450	79229599	Nooverlap	1.70546	0.0171273	2.17428	0.0171401	-0.604244	0.405552
chr11	79237950	79238699	Nooverlap	2.38784	0.0117475	2.65759	0.00460868	0.0340214	0.959996
chr11	79253600	79254749	Nooverlap	3.61108	0.0111299	3.80583	0.000156757	-0.681717	0.373918
chr11	79293650	79293949	Nooverlap	1.04677	0.065603	2.21224	0.0154626	-1.16931	0.277332
chr11	79294350	79294549	Nooverlap	0.326907	0.298698	3.43613	0.000496045	-1.70193	0.258446
chr11	79306650	79306799	Nooverlap	0.31062	0.447983	2.79719	0.00312267	-0.512964	0.465431
chr11	79306950	79307199	Nooverlap	1.97083	0.0123057	2.50843	0.00690061	0.301755	0.690235
chr11	79339000	79340649	Stable	3.07418	0.0111299	4.51488	1.78013e-05	-0.733054	0.366384
chr11	79660950	79661149	Nooverlap	1.50372	0.0213446	2.3753	0.00992601	-0.186156	0.776484
chr11	79670250	79670749	Nooverlap	3.13713	0.0111792	2.26896	0.0132524	-0.631687	0.399729
chr11	79703950	79704549	Stable	2.7995	0.0137727	3.04848	0.00154619	-0.687789	0.386835
chr11	79704750	79704999	Stable	1.8706	0.0994673	2.22548	0.0149066	-0.190394	0.804203
chr11	79803050	79803249	Nooverlap	3.12439	0.0111743	-0.0496824	0.9566	1.5455	0.259776
chr11	79805750	79806049	Nooverlap	1.8304	0.0225243	2.92635	0.00218403	-0.673584	0.395793
chr11	79806650	79806799	Nooverlap	1.8696	0.0379869	2.05273	0.023744	-0.625442	0.414858
chr11	79961800	79962299	Nooverlap	1.76734	0.0291169	2.73921	0.00368281	-0.721117	0.365939
chr11	79992350	79994149	Stable	3.17252	0.0111299	3.697	0.000221642	-0.930011	0.324091
chr11	80080350	80081049	Nooverlap	3.47509	0.0111299	3.17624	0.00107399	-0.596116	0.424107
chr11	80081100	80081499	Nooverlap	2.55529	0.0111365	2.36787	0.010131	-0.383038	0.585438
chr11	80089300	80090049	Nooverlap	2.87106	0.0111299	4.20331	4.51191e-05	-0.814046	0.343524
chr11	80141350	80142249	Nooverlap	2.53577	0.0227583	3.47134	0.000446819	-0.61716	0.44636
chr11	80209050	80209649	None	1.93388	0.0138358	3.05999	0.00150123	-0.787863	0.340222
chr11	80377550	80378249	Nooverlap	2.61027	0.0111365	3.8155	0.000151158	-0.448512	0.512495
chr11	80382600	80383049	Nooverlap	3.1527	0.0111299	2.46864	0.00770724	-0.627619	0.398524
chr11	80383200	80384299	Nooverlap	4.27918	0.0111299	4.67562	1.14434e-05	-0.720152	0.360592
chr11	80384650	80384899	Nooverlap	2.72948	0.0265045	0.91209	0.308181	0.250052	0.722501
chr11	80428600	80429599	Nooverlap	3.24415	0.0111299	4.02114	7.94995e-05	-1.13378	0.290769
chr11	80476700	80476849	Nooverlap	2.03937	0.0130361	1.20004	0.179923	-1.00892	0.289779
chr11	80477000	80477299	Nooverlap	1.26325	0.0671489	3.72073	0.000205041	-1.05182	0.297685
chr11	80810000	80811299	Nooverlap	3.05516	0.0111299	4.28434	3.54105e-05	-0.583323	0.422173
chr11	81094900	81095099	Nooverlap	0.945001	0.0757753	1.9938	0.027738	-0.716184	0.45287
chr11	81095500	81095749	Nooverlap	0.933673	0.236895	2.90666	0.00230682	-0.918506	0.347405
chr11	81096150	81096349	Nooverlap	0.0390224	0.916941	2.4506	0.00809033	-1.16993	0.265193
chr11	81298750	81299149	Nooverlap	1.43145	0.0208589	2.78137	0.00326079	-0.877183	0.332798
chr11	81299200	81300349	Nooverlap	1.70703	0.0229384	2.99357	0.00180501	-1.40891	0.259589
chr11	81371700	81371899	Nooverlap	2.73448	0.0111299	2.48586	0.00734447	0.835067	0.420173
chr11	81384150	81384249	Nooverlap	-0.2736	0.559844	1.0911	0.222611	-0.715842	0.449386
chr11	81384600	81385599	Stable	2.03115	0.012996	3.3148	0.000718067	-1.44555	0.259589
chr11	81386150	81386549	Stable	1.98541	0.0133749	3.10304	0.00132859	-1.26392	0.289779
chr11	81448600	81449299	Stable	2.89867	0.0111299	2.68374	0.00429311	-0.560154	0.442634
chr11	81449700	81449999	Stable	1.18176	0.0586763	3.20901	0.000975076	-1.19122	0.288095
chr11	81716250	81716449	Nooverlap	-0.460556	0.628086	2.66312	0.00453923	-1.31573	0.271111
chr11	81978550	81978749	Nooverlap	2.20588	0.0120741	2.92518	0.00219092	-0.439732	0.527561
chr11	81979300	81979449	Nooverlap	1.39039	0.0623975	2.75959	0.00346891	-0.21645	0.781532
chr11	81980650	81980799	Nooverlap	0.986448	0.495132	1.5417	0.0856216	-0.690676	0.483193
chr11	81981600	81982149	Stable	1.58123	0.0253321	3.25793	0.000848631	-1.1811	0.279132
chr11	81982550	81983099	Stable	1.61919	0.01581	2.54291	0.00627593	-0.95199	0.338163
chr11	82423250	82423749	Nooverlap	2.19905	0.0114249	2.95381	0.00201271	-1.04579	0.308846
chr11	82423950	82424299	Nooverlap	1.94633	0.0165705	2.67156	0.00444039	-1.01626	0.354845
chr11	82424650	82424799	Nooverlap	0.845158	0.204907	2.39537	0.00940015	-1.11647	0.290639
chr11	82537700	82537849	Nooverlap	1.13738	0.210887	2.31003	0.0118466	-0.336626	0.659027
chr11	82763850	82764849	Nooverlap	3.81039	0.0112691	3.30425	0.000740211	-0.585689	0.438067
chr11	82780500	82781999	Nooverlap	2.8653	0.0111299	4.25131	3.8609e-05	-0.893853	0.326576
chr11	82871000	82871149	Nooverlap	1.75992	0.0198889	2.10984	0.0204046	-1.18253	0.262225
chr11	83271150	83271599	Nooverlap	3.14225	0.0111299	4.69573	1.09461e-05	-0.912418	0.32849
chr11	83291200	83291549	Nooverlap	1.7327	0.0143874	3.55048	0.000349881	-0.888062	0.315038
chr11	83291750	83292599	Nooverlap	2.42834	0.016048	2.95459	0.00200964	-0.554522	0.446031
chr11	83298500	83299499	Nooverlap	2.73535	0.0111299	2.81589	0.00297754	-0.455056	0.524999
chr11	83302300	83303399	Nooverlap	2.54887	0.0111299	2.89666	0.00237393	-0.514968	0.463507
chr11	83472450	83474099	Nooverlap	3.16573	0.0111299	4.26474	3.71213e-05	-0.883054	0.339396
chr11	83592800	83593049	Nooverlap	1.69415	0.0295087	2.57381	0.00576961	-0.52457	0.468754
chr11	83753550	83754349	Nooverlap	2.18626	0.0117034	3.20613	0.000982455	-0.411687	0.538768
chr11	83942000	83942799	Nooverlap	2.68014	0.0114539	3.44973	0.00047559	-0.797865	0.357206
chr11	84013450	84013599	Nooverlap	-0.75799	0.101633	3.55498	0.00034528	-1.39393	0.258945
chr11	84129100	84129599	Nooverlap	2.73902	0.0111299	2.52953	0.00650787	-0.653284	0.385144
chr11	84179250	84179499	Stable	2.89726	0.0243949	2.83543	0.00282062	-0.0642341	0.928256
chr11	84179650	84180649	Stable	2.56137	0.0111299	3.70997	0.00021263	-0.70806	0.363594
chr11	84190250	84190549	Nooverlap	1.19404	0.0381967	1.78425	0.047606	-0.739942	0.355698
chr11	84396450	84396699	Nooverlap	3.62722	0.0111299	1.84968	0.0402897	-0.261305	0.686033
chr11	84412950	84413299	Nooverlap	2.23279	0.0135642	2.93887	0.00210344	-0.373469	0.612157
chr11	84513050	84513449	Nooverlap	2.23287	0.0133696	2.5042	0.00697458	-0.552326	0.438812
chr11	84819050	84819399	Nooverlap	1.51444	0.064893	1.77263	0.0489536	-0.417258	0.547566
chr11	84869250	84870199	Nooverlap	3.53245	0.0111299	3.36758	0.000611171	-0.301311	0.641169
chr11	84870250	84871499	Stable	3.20641	0.0111299	3.39604	0.000559763	-0.503252	0.464833
chr11	84879700	84881099	Nooverlap	2.91083	0.0111299	4.26624	3.69125e-05	-0.940452	0.317588
chr11	84916100	84916349	Stable	2.93884	0.0367484	1.81782	0.0437201	-0.485117	0.549923
chr11	85139400	85139949	Stable	2.56069	0.0131181	3.29037	0.000768673	-0.631185	0.397253
chr11	85140100	85140799	Stable	2.6929	0.0111299	3.88114	0.00012362	-0.280792	0.663845
chr11	85234000	85235449	Nooverlap	3.40466	0.0111299	4.01175	8.19238e-05	-0.646707	0.405394
chr11	85310500	85311099	Nooverlap	2.24779	0.0112691	3.0107	0.00171933	-0.565428	0.424431
chr11	85311200	85312149	Nooverlap	3.50151	0.0111299	3.89718	0.000117302	-0.822102	0.333974
chr11	85352200	85352549	Nooverlap	1.1967	0.0283672	2.62665	0.00500936	-0.338071	0.603562
chr11	85353350	85353749	Nooverlap	1.65309	0.0172198	2.38466	0.00968581	-0.39451	0.554259
chr11	85395650	85395999	Nooverlap	2.47215	0.0343034	2.51544	0.00676524	0.289324	0.679296
chr11	85430800	85430949	Stable	1.22629	0.0494485	2.46957	0.00768436	-0.91066	0.323866
chr11	85431650	85431999	Stable	2.19121	0.041238	2.35962	0.0103684	-0.324747	0.669153
chr11	85632150	85632549	Stable	1.64724	0.019238	2.72056	0.00387148	-0.819287	0.352767
chr11	85633100	85633299	Stable	1.23378	0.115157	3.40435	0.000546951	-1.33122	0.259776
chr11	85667800	85667949	Nooverlap	-0.275201	0.475325	2.3421	0.0108509	-1.06144	0.281394
chr11	85714650	85714849	Nooverlap	1.01874	0.0358404	2.14588	0.0184835	-1.05377	0.290839
chr11	85720950	85721149	Nooverlap	1.44135	0.0349997	2.06564	0.0229233	-0.766038	0.364301
chr11	85737700	85738049	Nooverlap	1.04361	0.0381721	2.60839	0.00527009	-1.26559	0.262225
chr11	85816200	85816299	Nooverlap	1.00089	0.36754	1.53268	0.087386	-0.657843	0.456845
chr11	85843950	85844199	Stable	1.28397	0.0337058	2.14138	0.0187131	-0.784032	0.344584
chr11	85875150	85876549	Stable	2.28974	0.011375	3.44146	0.000487744	-1.18078	0.276813
chr11	85876850	85877299	Nooverlap	0.963233	0.0458597	2.8446	0.0027511	-1.65559	0.258446
chr11	85909950	85910099	Nooverlap	0.663437	0.168174	1.63631	0.0684244	-1.30977	0.259589
chr11	85910500	85910999	Nooverlap	0.994247	0.078059	2.60911	0.00525897	-1.66872	0.258446
chr11	85916250	85918149	Stable	2.05189	0.0125479	3.08913	0.00138635	-0.961873	0.308846
chr11	85918200	85918849	Nooverlap	2.09795	0.0120055	2.71612	0.00392113	-0.588446	0.412131
chr11	85941550	85942049	Nooverlap	3.12309	0.0117034	1.69029	0.0600084	-0.358829	0.623457
chr11	86016050	86016499	Nooverlap	1.76134	0.0258685	2.78921	0.00319013	-0.555134	0.507215
chr11	86016700	86016899	Nooverlap	1.06123	0.121665	1.96543	0.0298998	-1.22227	0.295407
chr11	86017350	86017749	Nooverlap	0.808835	0.165151	2.80328	0.00307647	-1.02575	0.330488
chr11	86186600	86186699	Nooverlap	-0.0988197	0.939631	1.85506	0.0397243	-0.801133	0.409614
chr11	86200550	86201149	Stable	2.72199	0.011563	3.23376	0.000909059	-0.431431	0.521734
chr11	86201300	86202199	Stable	2.99287	0.0111299	3.83605	0.000141834	-0.702749	0.363939
chr11	86256700	86258199	Nooverlap	2.89146	0.0111299	3.33135	0.000681705	-0.733381	0.370864
chr11	86356600	86358399	Nooverlap	3.66192	0.0111299	4.61034	1.37166e-05	-0.840807	0.333146
chr11	86484700	86485149	Nooverlap	2.43308	0.0120369	2.60441	0.00533048	-0.701753	0.385045
chr11	86544100	86544799	Stable	3.09895	0.0111299	4.37007	2.68598e-05	-0.949126	0.32259
chr11	86545000	86545199	Stable	1.16213	0.0610756	2.183	0.0167423	-1.02471	0.334921
chr11	86545300	86545449	Stable	0.793235	0.549398	2.53156	0.00647791	-0.892461	0.375275
chr11	86569550	86571549	Stable	2.59188	0.0111299	3.41547	0.000529874	-0.785799	0.359028
chr11	86571750	86572049	Nooverlap	0.486826	0.468043	2.09474	0.0212218	-1.07206	0.293253
chr11	86675950	86676099	Nooverlap	3.63336	0.0111299	-1.31241	0.142589	2.04265	0.258446
chr11	86683350	86684749	Nooverlap	2.94662	0.0111299	3.17352	0.00108159	-0.543589	0.439672
chr11	86756600	86758799	Stable	2.87985	0.0111299	3.87323	0.000126417	-0.9462	0.320315
chr11	86807100	86807899	Nooverlap	2.19127	0.0114196	3.30976	0.000727623	-0.225454	0.727639
chr11	86993100	86993249	Nooverlap	1.91772	0.0769545	0.444367	0.621817	0.771812	0.364917
chr11	86993300	86993749	Nooverlap	2.60374	0.0111299	2.87465	0.00252836	-0.230045	0.723565
chr11	87073650	87074299	Nooverlap	1.73186	0.0150145	2.46329	0.00782616	-0.687233	0.368465
chr11	87086250	87086999	Nooverlap	3.36981	0.0111299	3.03242	0.00161717	-0.23681	0.727073
chr11	87087100	87087199	Nooverlap	0.342394	0.833425	1.86027	0.0391977	-0.832453	0.430947
chr11	87107800	87108749	Nooverlap	2.99728	0.0114944	3.66137	0.000248617	-0.302179	0.648959
chr11	87109150	87111249	Nooverlap	3.91962	0.0111299	4.07812	6.69933e-05	-0.701109	0.36439
chr11	87126100	87126899	Nooverlap	2.05755	0.0139573	3.22567	0.000929837	-0.554391	0.432389
chr11	87126950	87127899	Nooverlap	2.68415	0.0113591	3.7656	0.000177137	-0.901827	0.318424
chr11	87270550	87270649	Nooverlap	2.29513	0.0119743	0.398059	0.658729	1.06447	0.288692
chr11	87403850	87404549	Nooverlap	3.21381	0.0111299	4.10699	6.16535e-05	-0.734245	0.364464
chr11	87404700	87404999	Nooverlap	2.22365	0.0131604	2.3836	0.00971651	-0.312367	0.637941
chr11	87421900	87422949	Nooverlap	2.65553	0.0111299	3.7842	0.000167033	-1.03405	0.297685
chr11	87426300	87426799	Stable	2.62454	0.0111365	2.98705	0.00183759	-0.726855	0.427742
chr11	87442550	87442749	Nooverlap	0.884644	0.0592004	2.32953	0.0112259	-0.443216	0.517089
chr11	87442850	87443349	Stable	3.56667	0.0111299	4.30438	3.32786e-05	-0.741793	0.372613
chr11	87448000	87448749	Nooverlap	3.24739	0.0111299	3.68812	0.000228926	-0.820552	0.350774
chr11	87461900	87462399	Nooverlap	3.64965	0.0111299	3.879	0.000124279	-0.848704	0.345468
chr11	87470850	87471499	Nooverlap	3.55624	0.0111299	4.57442	1.52042e-05	-0.842586	0.344584
chr11	87590950	87591799	Nooverlap	2.84354	0.0111299	3.076	0.00143802	-0.537264	0.439912
chr11	87592100	87592999	Nooverlap	2.87779	0.0111299	3.56545	0.000334458	-0.487369	0.478044
chr11	87595600	87595999	Nooverlap	2.3807	0.0111792	2.62193	0.0050755	-0.400306	0.544898
chr11	87639200	87639349	Nooverlap	1.29251	0.0253713	1.69618	0.0591559	-0.22285	0.760556
chr11	87725750	87726049	Nooverlap	1.77041	0.0167113	2.39881	0.00931605	0.0810606	0.912685
chr11	87736900	87737299	Nooverlap	1.99189	0.0445793	2.35584	0.0104714	-0.636498	0.4495
chr11	87737500	87738199	Nooverlap	2.56851	0.0111299	3.61942	0.000283922	-0.50357	0.464083
chr11	87749150	87749299	Nooverlap	1.05026	0.041256	1.81909	0.0435744	0.0671938	0.919126
chr11	87749850	87749999	Nooverlap	0.407533	0.276694	3.67984	0.000235526	-0.518917	0.461249
chr11	87853250	87853449	Nooverlap	1.38728	0.0791864	2.36611	0.0101785	-0.646221	0.417941
chr11	87986400	87987599	Stable	3.93813	0.0111299	4.17029	4.98956e-05	-0.461313	0.496073
chr11	87987700	87988049	Stable	2.75089	0.0111299	2.40458	0.00917911	-0.0932945	0.886209
chr11	88046750	88049099	Stable	3.56999	0.0111299	4.63638	1.26316e-05	-0.911045	0.325448
chr11	88067550	88069449	Stable	3.96493	0.0111299	4.27537	3.61029e-05	-0.742295	0.363101
chr11	88069600	88069799	Nooverlap	2.12118	0.0119743	0.602562	0.50234	0.0165025	0.981549
chr11	88099200	88099999	Nooverlap	3.15209	0.0111299	5.11258	4.28805e-06	-0.811532	0.34835
chr11	88118350	88119049	Nooverlap	2.6666	0.0111299	3.24165	0.000889026	-0.199636	0.756189
chr11	88119300	88119649	Nooverlap	1.55695	0.0169466	2.68295	0.00430471	-0.293363	0.65249
chr11	88139400	88139799	Nooverlap	1.66213	0.0364786	3.08045	0.00142049	-1.06323	0.293409
chr11	88161300	88161399	Stable	2.29249	0.0114249	1.93827	0.0320655	0.535039	0.451211
chr11	88161650	88161999	Stable	2.23048	0.0126522	2.55854	0.00601421	-0.482638	0.480939
chr11	88181000	88181299	Stable	1.48187	0.01822	2.74567	0.00360924	-0.650838	0.383075
chr11	88203950	88205099	Nooverlap	2.05684	0.0175796	2.94706	0.00205423	-0.703155	0.373008
chr11	88235650	88235899	Nooverlap	1.18008	0.152096	2.26268	0.0134786	-0.95175	0.322011
chr11	88236200	88236349	Nooverlap	0.81063	0.140829	2.31918	0.0115442	-0.506877	0.497339
chr11	88240300	88240549	Stable	1.53953	0.0238259	2.43698	0.00839329	-0.542356	0.470344
chr11	88240650	88241249	Stable	2.99277	0.0129702	2.40069	0.00927164	-0.79923	0.366334
chr11	88241350	88241949	Stable	1.76917	0.0227288	2.52346	0.00661369	-0.613853	0.472229
chr11	88356700	88356899	Nooverlap	1.15136	0.0348147	1.7753	0.0486284	0.344761	0.59724
chr11	88366650	88366799	Nooverlap	1.64382	0.0354294	-0.979461	0.27369	1.51147	0.258446
chr11	88414200	88414349	Nooverlap	1.39031	0.195909	2.21233	0.015459	-0.235584	0.763761
chr11	88455350	88456199	Nooverlap	2.97062	0.0120016	2.46164	0.00786569	-0.589257	0.43287
chr11	88460800	88460949	Stable	1.56271	0.0540989	3.47296	0.000445509	-0.7575	0.384415
chr11	88506450	88506649	Nooverlap	-0.126276	0.904271	2.78272	0.00324888	-1.50171	0.30004
chr11	88507000	88507149	Nooverlap	1.05029	0.0421756	2.38711	0.00961996	-1.07627	0.324959
chr11	88525850	88526049	Nooverlap	0.694365	0.145881	2.19146	0.0163401	-1.31628	0.259589
chr11	88551150	88551649	Nooverlap	1.06781	0.0379408	2.70034	0.0040935	-1.31053	0.259589
chr11	88554800	88556399	Stable	1.40073	0.0206311	3.00258	0.00175969	-1.32518	0.261684
chr11	88556500	88556649	Stable	1.63751	0.0245084	2.23726	0.0144576	-0.961166	0.313789
chr11	88557050	88557299	Nooverlap	0.826309	0.0973513	2.44084	0.00830289	-1.03977	0.284537
chr11	88561650	88561849	Nooverlap	0.779017	0.409807	3.45164	0.000473193	-1.11676	0.297885
chr11	88582250	88582399	Nooverlap	2.15805	0.0431447	2.96315	0.00196395	-0.886265	0.362509
chr11	88582700	88582949	Nooverlap	0.768559	0.142825	3.66477	0.000245792	-0.774036	0.357382
chr11	88626750	88626849	Nooverlap	2.08906	0.0345638	3.40593	0.000544116	-0.452596	0.588511
chr11	88629700	88630049	Nooverlap	1.49909	0.0251897	2.73794	0.00369187	-0.805107	0.338678
chr11	88664900	88665049	Nooverlap	1.27326	0.0564336	1.50901	0.0923182	-0.678054	0.379171
chr11	88688900	88691799	HH-Sensitive	2.52337	0.0111299	3.61788	0.000285536	-1.24554	0.267982
chr11	88691850	88692099	Nooverlap	0.686276	0.0822471	3.57995	0.00031988	-1.33781	0.259589
chr11	88692500	88692699	Nooverlap	1.86105	0.0322903	1.8987	0.0355236	-0.355717	0.641794
chr11	88693050	88693999	HH-Sensitive	2.01285	0.0123817	3.59217	0.000307435	-1.33284	0.259589
chr11	88694250	88695049	HH-Sensitive	2.11827	0.0137422	2.74957	0.00357113	-1.14335	0.285124
chr11	88695100	88695649	Nooverlap	1.57536	0.0167179	2.77663	0.0033024	-0.705669	0.369427
chr11	88715700	88715849	Nooverlap	2.02622	0.074337	-0.122472	0.893076	-0.345675	0.633475
chr11	88716300	88716449	Nooverlap	1.54453	0.018189	2.09653	0.0211257	-0.946664	0.30357
chr11	88716500	88719099	Stable	3.3545	0.0111299	4.00599	8.28947e-05	-0.767716	0.344781
chr11	88848450	88848649	Nooverlap	1.81249	0.0689522	3.93362	0.000104234	-0.31318	0.654984
chr11	88864100	88864399	Stable	2.29159	0.0113381	2.3307	0.0111902	-0.910182	0.317575
chr11	88864800	88865249	Stable	2.56436	0.0111299	2.5609	0.00597622	-0.498562	0.467434
chr11	88955150	88955349	Nooverlap	2.60368	0.0271159	2.75417	0.00352458	-0.296787	0.682971
chr11	88973900	88974399	Nooverlap	3.2683	0.0111299	2.52685	0.0065499	-0.308478	0.65249
chr11	88974500	88974599	Nooverlap	0.539163	0.292692	1.96526	0.0299051	-0.18445	0.78338
chr11	89060350	89060549	Nooverlap	1.47483	0.182958	2.07628	0.0222739	0.0839837	0.9137
chr11	89429550	89429999	Nooverlap	2.73928	0.0126987	2.30092	0.0121526	-0.0668698	0.920952
chr11	90002500	90002849	Nooverlap	2.1678	0.0116612	2.94817	0.00204715	-0.764447	0.365866
chr11	90249450	90250299	Stable	2.95103	0.0111299	3.51062	0.000395778	-0.450654	0.504571
chr11	90637350	90638849	Nooverlap	3.23047	0.0111299	3.76737	0.000176308	-0.618078	0.40562
chr11	90664450	90664999	Nooverlap	1.38742	0.0583889	2.54798	0.00618988	-0.624704	0.42164
chr11	90709050	90709149	Nooverlap	-0.190222	0.575185	1.23056	0.169042	-0.0151191	0.987196
chr11	92233200	92233449	Nooverlap	0.345098	0.301664	2.5567	0.00604915	-2.09411	0.258446
chr11	93683350	93683599	Nooverlap	0.603172	0.10901	1.73748	0.0534733	-1.43746	0.274232
chr11	93684100	93684299	Nooverlap	-0.126627	0.734215	3.55233	0.000347714	-1.70536	0.258446
chr11	93817150	93818149	HH-Sensitive	1.19041	0.0282486	3.23909	0.000895442	-1.2803	0.286566
chr11	93818700	93818899	HH-Sensitive	1.34649	0.060878	2.2955	0.0123351	-1.26708	0.281463
chr11	93818950	93819199	HH-Sensitive	0.323083	0.298909	2.22325	0.0149903	-1.73568	0.258446
chr11	93884800	93887299	Stable	3.88481	0.0111299	4.50245	1.81879e-05	-0.760118	0.352883
chr11	93954900	93955949	Nooverlap	2.61808	0.0111804	2.99664	0.00178817	-0.697046	0.379171
chr11	93956350	93956549	Nooverlap	2.76829	0.0189093	2.54963	0.0061592	0.399483	0.561277
chr11	93967150	93967349	Nooverlap	1.29034	0.0238259	1.8682	0.0383822	-0.317324	0.684874
chr11	93967400	93968599	Nooverlap	2.10096	0.0130707	3.88931	0.000120626	-0.816813	0.341874
chr11	93995250	93995849	Nooverlap	2.77684	0.012998	2.54047	0.00631613	-0.57286	0.438925
chr11	93996050	93996699	Nooverlap	2.83167	0.0111299	3.38291	0.000581139	-0.468292	0.48974
chr11	94044250	94044699	Nooverlap	2.08656	0.0119984	2.7332	0.00373322	0.333992	0.625931
chr11	94133800	94133999	Nooverlap	-0.211303	0.839344	2.73265	0.00373869	-1.13021	0.334921
chr11	94138200	94138349	Stable	0.444755	0.62931	2.66856	0.00447612	-1.57495	0.259589
chr11	94138850	94139399	Stable	0.717231	0.19594	3.03445	0.00160844	-1.24144	0.265301
chr11	94209750	94210249	Nooverlap	3.15194	0.0111299	2.54411	0.00625889	0.65203	0.484565
chr11	94210350	94211149	Stable	4.42161	0.0111299	3.34265	0.000659827	0.43083	0.619189
chr11	94211450	94212699	Stable	4.43105	0.0111299	3.87068	0.000127209	-0.288519	0.664057
chr11	94320750	94322649	Nooverlap	3.92036	0.0111299	4.4965	1.83714e-05	-0.566252	0.439942
chr11	94327050	94328949	Stable	3.13755	0.0121555	3.47491	0.000442982	-0.50666	0.477427
chr11	94468150	94468249	Nooverlap	1.09781	0.242108	1.99394	0.0277289	-0.309684	0.68679
chr11	94469250	94469599	Nooverlap	2.36728	0.0237531	2.01373	0.0263066	-0.653984	0.392707
chr11	94470000	94470149	Stable	1.10833	0.0304257	2.54165	0.00629631	-0.593959	0.447619
chr11	94470250	94470499	Stable	3.45042	0.0111299	1.62147	0.0709077	0.200378	0.76042
chr11	94470900	94471149	Stable	1.12857	0.0552873	2.35617	0.0104644	-0.872507	0.322487
chr11	94473300	94474349	Stable	3.22005	0.0112393	3.14019	0.00119406	-0.517092	0.461928
chr11	94483300	94483449	Nooverlap	-0.557552	0.507733	1.15251	0.197721	-1.19028	0.289779
chr11	94526850	94527299	HH-Dependent	1.77203	0.0548558	2.773	0.00333609	-0.465113	0.537038
chr11	94528850	94528949	Nooverlap	0.694225	0.142415	2.5937	0.00546866	-0.746722	0.425417
chr11	94549050	94549249	Nooverlap	2.0074	0.0177362	2.33747	0.0109876	-0.986027	0.305584
chr11	94601500	94601949	Stable	1.78951	0.0137193	3.24344	0.000884854	-0.212721	0.741773
chr11	94629750	94630399	Nooverlap	2.49898	0.0114768	3.51719	0.000387294	-0.882195	0.331288
chr11	94653250	94654099	Nooverlap	2.73326	0.0111299	3.32152	0.000703341	-0.700887	0.39023
chr11	94676900	94677449	Nooverlap	2.81318	0.0111365	3.66781	0.000243623	-0.487103	0.488861
chr11	94877200	94877349	Nooverlap	0.624102	0.17466	1.82836	0.04256	-0.368238	0.617732
chr11	94880500	94883049	Stable	2.47118	0.0111703	3.51426	0.000391504	-0.753325	0.363209
chr11	94883200	94883349	Nooverlap	1.0672	0.0556231	2.41179	0.00899949	-0.695732	0.367723
chr11	94928600	94928799	Stable	1.75543	0.0538915	2.11102	0.0203349	-1.32885	0.259776
chr11	94929100	94929549	Stable	2.12906	0.0233502	2.8275	0.00288675	-0.752297	0.356104
chr11	94989550	94989799	Stable	1.36271	0.0209653	2.49701	0.00712106	-0.66157	0.387743
chr11	94990600	94991899	Stable	2.39542	0.0111365	3.02762	0.00163853	-0.744841	0.370226
chr11	94992350	94992649	Nooverlap	0.912134	0.0884444	2.54538	0.00623807	-0.923793	0.319043
chr11	95009600	95010449	Stable	2.38507	0.0112303	3.24063	0.000891331	-0.411565	0.541491
chr11	95010550	95010749	Nooverlap	2.44791	0.0122433	1.63903	0.067982	-0.19866	0.760477
chr11	95041150	95041299	Nooverlap	2.83186	0.0111299	1.45824	0.103651	0.00428242	0.995347
chr11	95041750	95041849	Nooverlap	1.8087	0.0135424	2.45213	0.00805974	-0.0569886	0.933136
chr11	95259000	95259249	None	1.73882	0.014751	2.79387	0.00315325	-0.699956	0.364917
chr11	95309300	95309549	Nooverlap	1.62857	0.0439722	2.31443	0.0117081	-0.111088	0.870801
chr11	95309700	95310349	Nooverlap	3.19428	0.0111299	3.96217	9.5057e-05	-0.866282	0.33289
chr11	95310500	95311099	Nooverlap	2.24864	0.0221652	2.19416	0.0162351	-0.743918	0.368321
chr11	95337100	95337699	Nooverlap	2.96047	0.0111299	2.89895	0.0023611	-0.0986234	0.882972
chr11	95384550	95385699	Stable	3.39641	0.0111299	4.09278	6.42362e-05	-0.864426	0.333146
chr11	95414150	95414699	Stable	2.53601	0.0112691	3.06692	0.00147349	-0.543902	0.438317
chr11	95414900	95415249	Stable	2.19766	0.0151318	2.41873	0.00883251	-0.38296	0.588056
chr11	95455250	95455599	Nooverlap	0.525468	0.146624	3.03352	0.00161245	-1.09943	0.301596
chr11	95554750	95554949	Nooverlap	1.54364	0.0257016	2.20547	0.0157321	0.62311	0.44263
chr11	95555000	95555349	Nooverlap	1.07311	0.128386	2.62893	0.00497694	-1.42496	0.260378
chr11	95555550	95556049	Nooverlap	2.51921	0.0113381	2.06705	0.0228445	-0.524743	0.473587
chr11	95566050	95566149	Nooverlap	0.345098	0.301664	1.17572	0.188874	-0.396881	0.581592
chr11	95568050	95568299	None	1.22084	0.0678671	3.75581	0.000183083	-0.727021	0.362187
chr11	95568750	95568999	None	1.59629	0.0216642	2.78581	0.00321959	-0.755789	0.360001
chr11	95582100	95582199	Nooverlap	0.194154	0.671483	0.820613	0.35969	-0.445637	0.578398
chr11	95666950	95667349	Nooverlap	1.54613	0.0245455	2.41273	0.00897764	-0.64427	0.39387
chr11	95708250	95708499	Nooverlap	1.77759	0.0141329	2.47432	0.00758481	-0.838483	0.349198
chr11	95712650	95713749	Stable	3.44097	0.0111299	3.83469	0.000142367	-0.684067	0.381208
chr11	95824000	95824349	None	1.91071	0.0269211	3.07512	0.00144126	-0.730672	0.376895
chr11	95858900	95859099	Nooverlap	2.17561	0.0119153	1.44227	0.107441	0.128084	0.844879
chr11	95859300	95859699	Nooverlap	2.55813	0.0112081	2.58969	0.00552988	-0.668271	0.382621
chr11	95983050	95983299	Nooverlap	0.997355	0.124278	2.14717	0.0184201	-0.148145	0.830126
chr11	95989900	95990299	Nooverlap	2.31832	0.0159763	3.00929	0.00172593	-0.650097	0.389585
chr11	95990400	95991749	Stable	2.75358	0.0116694	3.70923	0.000213188	-0.723451	0.359028
chr11	95991950	95992199	Stable	4.07985	0.0224548	4.1481	5.36307e-05	-0.0682471	0.930928
chr11	96003250	96003749	Nooverlap	2.30116	0.0124869	2.20678	0.0156884	0.100243	0.87825
chr11	96004050	96008599	Stable	3.7763	0.0111299	4.50507	1.81629e-05	-0.771975	0.343766
chr11	96010950	96011149	Nooverlap	1.60825	0.0935698	3.04243	0.00157155	-0.594821	0.441433
chr11	96034900	96035149	Nooverlap	1.65799	0.0168849	2.46729	0.00773852	-0.963877	0.300596
chr11	96064550	96065399	Nooverlap	3.42344	0.0111299	3.79292	0.000162489	-0.88499	0.325094
chr11	96065550	96065799	Nooverlap	3.38169	0.0139971	3.196	0.00101142	-0.867394	0.334627
chr11	96074950	96075699	Nooverlap	1.96196	0.0123542	3.10183	0.00133313	-0.641875	0.385947
chr11	96076150	96076399	Nooverlap	3.42989	0.0111299	1.66144	0.0644046	-0.189182	0.793465
chr11	96271450	96271749	Nooverlap	1.03435	0.1339	3.02639	0.00164383	-0.58475	0.499588
chr11	96284100	96285149	Stable	2.93018	0.0127389	2.24095	0.0143114	-0.0149517	0.984431
chr11	96285700	96287449	Stable	2.56052	0.0127935	2.87215	0.00254723	-0.0525195	0.941219
chr11	96292550	96292749	Nooverlap	1.86099	0.0313908	1.76399	0.0500242	0.616778	0.425593
chr11	96294900	96295049	Nooverlap	0.64759	0.320637	2.27818	0.012911	-1.04415	0.293253
chr11	96299100	96299499	Nooverlap	2.61859	0.0144455	1.52108	0.0897809	0.252855	0.705056
chr11	96303600	96304499	Nooverlap	2.35161	0.0177561	2.91268	0.00226801	-0.31363	0.679296
chr11	96304750	96305199	Nooverlap	2.02711	0.051784	2.52893	0.00651556	-0.0817682	0.909574
chr11	96306350	96306749	Nooverlap	0.46318	0.563527	2.81187	0.00300552	-0.939483	0.336167
chr11	96307300	96307599	Nooverlap	1.55632	0.0634645	3.0883	0.00138924	-0.697988	0.407053
chr11	96309400	96309599	Nooverlap	2.13751	0.0270445	3.107	0.00131389	-0.130138	0.863922
chr11	96310100	96310249	Stable	1.82445	0.0142287	2.45396	0.00803259	0.0193504	0.977668
chr11	96311100	96311649	Stable	1.74815	0.0508381	2.86292	0.00262145	-0.351686	0.614126
chr11	96311800	96312249	Nooverlap	1.38762	0.0308066	2.65055	0.00469615	-0.767341	0.355804
chr11	96314200	96314449	Nooverlap	1.97422	0.0755556	2.04531	0.0242211	-0.539878	0.487076
chr11	96314500	96315349	Nooverlap	2.94172	0.0111299	3.96135	9.52953e-05	-0.421444	0.572699
chr11	96315500	96315599	Nooverlap	0.355203	0.302163	2.5896	0.00552988	-1.08165	0.284569
chr11	96316000	96316149	Nooverlap	1.45625	0.0188095	2.57468	0.00575647	-0.279067	0.71949
chr11	96317850	96321149	Stable	2.8348	0.011981	3.72665	0.000201101	-0.70932	0.413267
chr11	96323050	96323249	Nooverlap	1.25195	0.0874956	2.35837	0.0103987	-0.925594	0.336677
chr11	96323550	96324049	Nooverlap	1.45873	0.100603	3.07292	0.00145043	-0.27463	0.735475
chr11	96324550	96324749	Nooverlap	1.48783	0.0376949	2.90706	0.00230503	-0.0119382	0.988757
chr11	96325300	96326099	Stable	2.01918	0.0173667	2.16038	0.0177816	-0.306461	0.701859
chr11	96326200	96326599	Stable	2.66902	0.0151318	2.12678	0.0194683	-0.589959	0.470891
chr11	96326800	96326949	Nooverlap	1.71984	0.023234	1.43387	0.109458	-0.63524	0.399632
chr11	96332650	96333849	Stable	3.3027	0.0112008	3.29595	0.00075697	-0.341013	0.653865
chr11	96340500	96341149	Stable	2.30091	0.0114089	2.81677	0.00297036	-1.14196	0.288365
chr11	96341250	96342349	Stable	3.03258	0.0249044	2.61866	0.005121	-0.628498	0.451469
chr11	96344300	96344599	Nooverlap	1.94795	0.0185519	2.44232	0.00827914	0.118595	0.862555
chr11	96345800	96346099	Nooverlap	1.69534	0.0376325	3.3759	0.000593335	-0.678885	0.433086
chr11	96348600	96348799	Nooverlap	1.31255	0.0690801	1.58355	0.0775525	-0.0169759	0.980627
chr11	96349900	96350149	Nooverlap	1.62465	0.0790391	1.80782	0.0448621	-0.167253	0.816554
chr11	96351050	96351199	Nooverlap	1.33479	0.154124	2.00976	0.0265903	0.0104598	0.990293
chr11	96351600	96355049	Stable	2.88764	0.0111365	3.32673	0.000691831	-0.675183	0.388362
chr11	96432200	96432399	None	1.92528	0.0127636	2.4191	0.00882272	-0.161215	0.808144
chr11	96788850	96790199	Nooverlap	2.94246	0.0111299	3.99248	8.66909e-05	-0.9233	0.326269
chr11	96823550	96824049	Stable	2.96071	0.0111299	2.54582	0.00623123	0.123861	0.867939
chr11	96824400	96824649	Stable	2.37585	0.0137727	1.77037	0.0492327	-0.186937	0.776246
chr11	96829100	96829999	Stable	2.96986	0.0111299	3.27646	0.000802098	-0.663377	0.402136
chr11	96830150	96830999	Stable	3.39342	0.0111299	2.79075	0.00317724	-0.495565	0.499588
chr11	96875500	96875799	Stable	2.00051	0.0125479	3.54553	0.000355057	-0.303374	0.677304
chr11	96876000	96876299	Stable	1.56713	0.050836	2.60469	0.0053289	-0.388703	0.610283
chr11	96892500	96892649	Nooverlap	1.14772	0.0317796	1.56773	0.0805435	-0.555431	0.435303
chr11	96893050	96893199	Nooverlap	3.81462	0.0124389	1.50901	0.0923182	0.071996	0.91761
chr11	96899150	96899399	Nooverlap	1.76597	0.120103	2.20396	0.0157992	-0.594335	0.494989
chr11	96899750	96900099	Nooverlap	1.87951	0.0158628	2.76205	0.00344393	-1.16354	0.293594
chr11	96915950	96916449	Nooverlap	2.69325	0.0134707	2.99477	0.00179856	-0.56687	0.43075
chr11	96976900	96977799	Nooverlap	3.28117	0.0111299	4.39729	2.46246e-05	-1.02004	0.311282
chr11	97041150	97041299	Stable	1.66782	0.0477543	3.04243	0.00157155	-0.132964	0.846596
chr11	97041600	97042049	Stable	2.17893	0.0115744	3.49143	0.000420372	-0.850776	0.329317
chr11	97150300	97151799	Stable	2.75464	0.0111299	3.32607	0.000693418	-0.781583	0.344407
chr11	97186350	97187999	Stable	3.28261	0.0111299	4.50745	1.80718e-05	-0.680192	0.371343
chr11	97188200	97189199	Stable	3.42527	0.0111299	3.35161	0.000641037	-0.452517	0.505621
chr11	97279650	97280649	Stable	2.72263	0.0111304	4.51748	1.77802e-05	-0.553794	0.462591
chr11	97315800	97316499	Nooverlap	1.66158	0.0157353	3.01352	0.00170618	-1.00419	0.315922
chr11	97362000	97363099	Nooverlap	3.35859	0.0111299	2.81936	0.00295222	-0.559005	0.46859
chr11	97415600	97415899	Nooverlap	2.99175	0.0120625	2.06025	0.0232588	-0.328949	0.635067
chr11	97435800	97435949	Nooverlap	3.12434	0.0111365	1.10698	0.215932	-0.340545	0.605325
chr11	97438350	97438499	Nooverlap	0.466359	0.298087	0.342292	0.704517	-0.490266	0.487552
chr11	97450300	97450549	Nooverlap	2.60261	0.0183161	1.30205	0.145716	0.188746	0.780111
chr11	97524200	97524349	Nooverlap	2.86549	0.0142287	2.20331	0.015827	-0.707159	0.37766
chr11	97628900	97629749	Nooverlap	2.98016	0.0111299	3.90166	0.000115778	-0.745917	0.374089
chr11	97659950	97660399	None	2.1097	0.0146586	3.10177	0.00133338	-0.379095	0.604564
chr11	97661600	97661899	Stable	1.25563	0.0261131	2.06025	0.0232588	-0.960955	0.308379
chr11	97662000	97664849	Stable	3.24544	0.0111299	3.93718	0.000102882	-0.94755	0.314389
chr11	97698100	97700949	Nooverlap	3.08732	0.0111299	3.71255	0.00021103	-0.796671	0.339396
chr11	97702600	97702999	Stable	2.15072	0.0119476	2.53755	0.00636651	0.033226	0.960802
chr11	97703500	97703749	Stable	1.80255	0.0202997	2.25475	0.0137729	-0.612341	0.403582
chr11	97719250	97719399	Nooverlap	1.84494	0.0144082	-0.460492	0.609082	0.993919	0.358555
chr11	97733250	97733849	Stable	2.39149	0.0134752	2.92936	0.00216442	-1.03838	0.290839
chr11	97734000	97734699	Stable	2.17442	0.019788	3.47514	0.00044284	-1.23163	0.268202
chr11	97744150	97745499	Nooverlap	2.86642	0.0111299	3.87835	0.000124376	-0.72206	0.371074
chr11	97766050	97766599	Nooverlap	2.76171	0.0111299	2.69472	0.00416011	-0.761339	0.357062
chr11	97781100	97782399	Nooverlap	3.64546	0.0111299	3.8805	0.000123879	-0.582806	0.420953
chr11	97782450	97782949	Nooverlap	2.11438	0.0136662	2.65376	0.00465493	-0.341899	0.605682
chr11	97799100	97799199	Stable	1.3697	0.0320883	1.6141	0.0721459	-0.945935	0.302712
chr11	97799250	97799649	Stable	2.11781	0.0120904	2.56547	0.0059022	-0.728655	0.360001
chr11	97799750	97801249	Stable	2.80405	0.0111299	2.86494	0.00260783	-0.518571	0.453498
chr11	97804950	97805149	Nooverlap	0.785588	0.221005	2.15804	0.0178891	0.0348438	0.961812
chr11	97815550	97815749	Nooverlap	1.44275	0.0331547	3.30042	0.000748483	-0.0497268	0.940493
chr11	97817100	97817399	Nooverlap	2.66247	0.0111299	1.41523	0.114062	0.109135	0.866624
chr11	97817550	97817749	Nooverlap	1.11962	0.0298641	2.03198	0.0250779	-0.422572	0.535459
chr11	97818700	97819049	Nooverlap	2.3241	0.0240584	2.25293	0.0138436	-0.499291	0.47938
chr11	97840700	97840799	Stable	1.68729	0.0191699	1.79779	0.0459844	-0.252249	0.701239
chr11	97840900	97841199	Stable	2.59337	0.0123319	2.52327	0.00661635	-0.247969	0.705342
chr11	97841300	97841699	Stable	1.62072	0.0200934	3.34039	0.000663285	-0.888003	0.319772
chr11	97876550	97877349	Nooverlap	1.65786	0.0156407	3.11854	0.00127312	-1.7917	0.258446
chr11	97877800	97878749	Nooverlap	0.250885	0.421875	3.50338	0.000405699	-1.79997	0.259486
chr11	97883350	97884099	Nooverlap	2.83896	0.0122682	3.32848	0.000687334	-1.0157	0.303125
chr11	97884250	97884799	Nooverlap	2.25007	0.0209163	3.57698	0.000322301	-0.397193	0.615326
chr11	97980350	97980449	Nooverlap	2.14712	0.0944331	1.46361	0.102375	-0.36958	0.627547
chr11	97980900	97981049	Nooverlap	1.32308	0.0243595	2.69343	0.00417223	0.185516	0.776709
chr11	97988400	97988799	Nooverlap	1.80302	0.0147008	3.27587	0.000803796	-0.64192	0.390111
chr11	98022500	98023249	Nooverlap	2.71469	0.0111365	3.44392	0.000483694	-0.267503	0.68652
chr11	98026200	98027899	Nooverlap	4.00836	0.0111299	4.77241	8.8133e-06	-0.868433	0.332779
chr11	98148950	98150399	Stable	3.35544	0.0111299	3.90261	0.000115511	-0.557517	0.42942
chr11	98192600	98193349	Nooverlap	3.47483	0.0111299	3.05409	0.00152255	-0.193985	0.765556
chr11	98201900	98203699	Nooverlap	3.42694	0.0111299	4.14411	5.41918e-05	-0.789991	0.351941
chr11	98358100	98358899	Stable	1.60606	0.0160405	3.27047	0.000817926	-0.834516	0.337941
chr11	98361400	98361599	Nooverlap	1.33747	0.0259295	2.58534	0.00559647	-0.193391	0.777087
chr11	98400200	98400699	Nooverlap	1.60748	0.0345028	3.6019	0.000298389	-1.22158	0.278661
chr11	98412600	98413199	Nooverlap	2.73789	0.0154303	3.22936	0.000920002	-0.495313	0.498197
chr11	98438700	98438999	Nooverlap	2.66902	0.0151318	3.08472	0.00140473	0.01804	0.979826
chr11	98497300	98497899	Nooverlap	1.57201	0.0221582	2.68754	0.00424518	-0.889757	0.332927
chr11	98551100	98551399	Nooverlap	1.05397	0.0335419	2.49718	0.00711916	-1.40234	0.258446
chr11	98586850	98587199	Stable	2.22207	0.0332824	2.76723	0.00339099	-0.380668	0.58326
chr11	98587550	98587799	Stable	1.89273	0.0470869	2.81002	0.0030202	-0.397507	0.591092
chr11	98682300	98683349	Nooverlap	2.79862	0.0111299	3.68023	0.000235526	-0.933134	0.308846
chr11	98729050	98729549	Nooverlap	1.76298	0.0208925	2.684	0.00428942	-0.297352	0.663579
chr11	98741100	98741199	Nooverlap	0.539763	0.498708	2.9102	0.00228602	-0.964769	0.325783
chr11	98741400	98742499	Nooverlap	2.59027	0.0111513	2.89106	0.00241321	-0.760521	0.362509
chr11	98750800	98750899	Nooverlap	0.663437	0.168174	1.13745	0.203668	0.174848	0.79517
chr11	98754500	98754599	Nooverlap	0.598996	0.101045	1.99812	0.0274303	-0.943558	0.310493
chr11	98775850	98776249	Nooverlap	1.78403	0.0137774	3.11207	0.00129773	-0.178647	0.78139
chr11	98777400	98777599	Nooverlap	0.926385	0.0444698	2.03094	0.0251475	-0.61477	0.398747
chr11	98782700	98783249	Nooverlap	1.7868	0.0189427	3.05644	0.0015141	-0.932579	0.305584
chr11	98788650	98788749	Nooverlap	1.23076	0.125041	1.14311	0.201397	-0.833564	0.345419
chr11	98789150	98789749	Nooverlap	2.71291	0.0113594	2.91813	0.00223536	-0.124891	0.849223
chr11	98794250	98797099	Stable	3.33663	0.0111299	4.38215	2.58863e-05	-1.07181	0.282943
chr11	98809350	98810499	Stable	2.56237	0.0111299	3.41316	0.000533177	-0.963422	0.305395
chr11	98863150	98864549	Stable	2.84041	0.0111299	2.843	0.00276367	-0.500896	0.474566
chr11	98902800	98903099	Nooverlap	1.80987	0.182857	2.21809	0.0152046	-0.147676	0.859622
chr11	98907300	98907499	Stable	1.70046	0.11127	1.95803	0.0304896	-0.809589	0.36361
chr11	98907800	98908499	Stable	3.07188	0.0111299	3.93552	0.00010342	-0.794542	0.342525
chr11	98922600	98922799	Stable	0.675406	0.149255	2.2218	0.0150476	-1.17887	0.267661
chr11	98923200	98923799	Stable	1.93427	0.0126563	3.20065	0.000996236	-0.929309	0.312623
chr11	98924150	98924349	Nooverlap	1.51617	0.0468178	2.99698	0.00178642	-0.894371	0.320317
chr11	98924800	98926749	Stable	2.82741	0.0111299	3.55631	0.000344341	-0.831668	0.339396
chr11	98927900	98928249	Nooverlap	1.66597	0.0968099	2.51782	0.00671865	-0.238878	0.737366
chr11	98937600	98938499	Stable	2.48325	0.0111365	3.69907	0.00022027	-0.4861	0.487863
chr11	98940950	98941149	Nooverlap	2.2073	0.0171157	2.24304	0.0142242	-0.171168	0.794625
chr11	98941400	98942999	Stable	3.16321	0.0111299	3.097	0.00135259	-0.53373	0.462195
chr11	98943950	98944149	Nooverlap	2.04092	0.0149439	2.31116	0.0118198	-0.196864	0.767414
chr11	98944300	98944499	Nooverlap	0.757834	0.115417	2.04658	0.0241367	-1.02821	0.287398
chr11	98960000	98960749	Stable	1.25739	0.0288928	2.48629	0.00734086	-0.643853	0.394867
chr11	98963300	98964199	Stable	2.20803	0.0114318	2.48415	0.00738052	-0.959379	0.310909
chr11	98964550	98964749	Nooverlap	1.52767	0.0945759	2.51709	0.00673003	-0.728872	0.384368
chr11	99023450	99024199	Nooverlap	3.06714	0.0111365	3.95575	9.68088e-05	-0.660471	0.388717
chr11	99024700	99024799	Nooverlap	1.01605	0.0360305	1.16736	0.192029	-0.593618	0.415068
chr11	99039800	99042099	Stable	3.14809	0.0111299	3.58683	0.000312844	-0.808051	0.334742
chr11	99046600	99046999	Nooverlap	0.938445	0.0812484	2.41614	0.00890093	-1.39737	0.258945
chr11	99047350	99047849	Nooverlap	2.11042	0.0122433	2.09161	0.0213899	-0.404027	0.544874
chr11	99054750	99056799	Stable	2.29222	0.0112008	3.51805	0.000386304	-1.16267	0.287909
chr11	99071350	99071949	Stable	1.80031	0.0147583	2.79342	0.00315589	-0.817531	0.355698
chr11	99072300	99072549	Stable	1.63922	0.0337615	2.18122	0.0168216	-0.545839	0.444514
chr11	99078100	99078199	Nooverlap	-0.162363	0.779643	1.7894	0.0469923	-0.897284	0.356609
chr11	99078600	99078699	Nooverlap	1.4546	0.020661	1.50269	0.093664	-0.490394	0.497871
chr11	99095050	99095699	Stable	1.60974	0.023846	3.00557	0.00174547	-1.0401	0.292081
chr11	99095900	99097049	Stable	1.61852	0.0187503	2.99169	0.00181461	-1.42383	0.259589
chr11	99097350	99098049	Nooverlap	1.30504	0.0230539	2.52164	0.0066436	-1.64303	0.258446
chr11	99098250	99098449	Nooverlap	0.894582	0.472652	2.7252	0.0038203	-1.39688	0.292238
chr11	99106550	99106749	Nooverlap	1.26995	0.0550792	2.65699	0.00461635	-1.05443	0.288365
chr11	99107050	99107249	Nooverlap	0.678211	0.407047	2.94766	0.00205025	-1.1192	0.292088
chr11	99121450	99121599	Nooverlap	1.24113	0.0247105	1.87905	0.0373671	0.416558	0.565292
chr11	99131750	99131999	Nooverlap	1.26873	0.171806	2.25172	0.0138861	-1.13273	0.293253
chr11	99132200	99132549	Stable	1.32146	0.0442485	2.87761	0.00250756	-0.915084	0.312149
chr11	99134550	99134799	Stable	0.901687	0.0839821	2.48641	0.00733804	-0.753056	0.350453
chr11	99134950	99135349	Stable	1.47755	0.0276426	3.02574	0.00164679	-0.61847	0.401157
chr11	99147350	99147549	Stable	1.25444	0.0312126	2.59026	0.00552145	-0.243948	0.719169
chr11	99147950	99148499	Stable	2.45016	0.0118367	3.47567	0.000442063	-0.726321	0.361956
chr11	99148750	99149099	Nooverlap	1.04094	0.0737261	2.3485	0.0106827	-0.73677	0.358439
chr11	99149450	99149649	Nooverlap	0.764082	0.128616	2.09709	0.0211078	-0.906818	0.320317
chr11	99149850	99149999	Nooverlap	2.15608	0.0135863	2.22074	0.01509	-0.190719	0.789134
chr11	99229250	99231499	Stable	4.1875	0.0111299	4.69542	1.09461e-05	-0.751424	0.359634
chr11	99385700	99386849	Nooverlap	3.13338	0.0111299	3.05544	0.0015185	-0.630866	0.399863
chr11	99778850	99778999	Nooverlap	0.466552	0.302136	2.77864	0.0032831	-1.15934	0.276638
chr11	100319500	100319649	Stable	2.23888	0.0208244	2.42169	0.0087586	-0.0653218	0.924505
chr11	100319950	100321249	Stable	3.03325	0.0118367	3.39	0.000569634	-0.887183	0.326217
chr11	100414150	100414749	Stable	2.76135	0.0111299	3.26414	0.000834055	-0.248752	0.721693
chr11	100415300	100415449	Stable	1.70309	0.0754599	2.10404	0.0207251	-0.762363	0.437263
chr11	100415850	100415999	Nooverlap	1.5263	0.0461771	1.96367	0.0300318	-0.579124	0.449669
chr11	100440600	100441299	Nooverlap	3.2474	0.0111299	2.26419	0.0134271	-0.576261	0.437608
chr11	100472100	100472799	Nooverlap	2.40764	0.0111365	2.8563	0.00267228	-0.667888	0.379339
chr11	100527050	100527899	Nooverlap	2.94787	0.0111299	3.33282	0.000678319	-0.611789	0.400427
chr11	100545350	100545549	Nooverlap	2.18768	0.0116702	1.4203	0.112778	0.840753	0.352222
chr11	100545750	100545999	Nooverlap	1.56729	0.0276882	2.33221	0.0111563	-0.634064	0.424912
chr11	100618750	100619699	Stable	2.99829	0.0117588	3.63384	0.000271822	-0.801548	0.340164
chr11	100619800	100620099	Stable	1.99754	0.0139551	2.32722	0.0112928	-0.479407	0.4827
chr11	100620200	100620349	Stable	1.44543	0.130427	1.88008	0.0372746	-0.570074	0.456697
chr11	100622950	100623449	Nooverlap	2.69035	0.0162009	2.89845	0.00236383	-0.586937	0.438812
chr11	100656550	100656749	Nooverlap	3.79245	0.0111299	1.43181	0.109934	0.848888	0.336167
chr11	100712050	100712549	Nooverlap	3.81457	0.0111299	3.56205	0.000337864	-0.384202	0.561038
chr11	100713600	100714399	Nooverlap	1.8279	0.0146586	2.74566	0.00360927	-0.195098	0.78009
chr11	100725350	100725549	Nooverlap	2.07165	0.0131181	2.79496	0.00314259	0.116049	0.875247
chr11	100736450	100736649	Nooverlap	2.7277	0.0111299	0.59968	0.504385	0.816501	0.33175
chr11	100737650	100738249	Nooverlap	1.95567	0.0188709	3.24415	0.000883027	-0.840117	0.339396
chr11	100786800	100786999	Nooverlap	0.382741	0.529991	2.28297	0.012749	-0.615289	0.427024
chr11	100850100	100850749	Nooverlap	2.87447	0.0111299	2.43144	0.00851994	-0.250612	0.701966
chr11	100892050	100892199	Nooverlap	1.42402	0.0210509	2.64832	0.00472323	-0.0715445	0.919126
chr11	100938800	100939499	Nooverlap	2.92285	0.0111299	3.22215	0.000938972	-0.353159	0.600529
chr11	101082600	101083249	Stable	3.1302	0.0130354	3.34023	0.000663559	-0.48259	0.48849
chr11	101086850	101086999	None	1.31873	0.134978	1.30849	0.143794	-0.131508	0.854698
chr11	101087250	101087599	None	2.78836	0.0133311	1.87634	0.0376324	-0.061241	0.930126
chr11	101094950	101095449	Nooverlap	2.71279	0.0111299	2.54064	0.00631242	-0.825311	0.359157
chr11	101095500	101095949	Nooverlap	2.67558	0.0270872	2.77152	0.00334931	-0.564731	0.464182
chr11	101119050	101119849	Stable	3.2284	0.0123319	3.52268	0.000380826	-0.625304	0.415672
chr11	101120100	101120699	Stable	2.24393	0.0113914	2.99125	0.00181685	-0.690659	0.378572
chr11	101149100	101149249	Nooverlap	1.29159	0.0243949	2.26982	0.0132199	-0.544498	0.436546
chr11	101231200	101231349	Nooverlap	2.13134	0.0740286	2.15437	0.0180757	-0.724564	0.395681
chr11	101231750	101231949	Nooverlap	1.10223	0.226675	2.19287	0.0162866	-0.515866	0.497474
chr11	101232100	101232249	Nooverlap	2.47632	0.0738397	1.81433	0.0441187	-0.42985	0.621232
chr11	101253700	101254249	Nooverlap	1.85024	0.0304966	2.66884	0.00447358	-0.613426	0.420207
chr11	101278700	101278899	Nooverlap	1.60857	0.0393102	2.60257	0.00535036	0.00767675	0.991647
chr11	101301650	101302249	Nooverlap	2.47151	0.0121415	2.83189	0.00285033	-0.625738	0.412136
chr11	101315750	101316899	Stable	2.9866	0.0111299	2.93959	0.00209915	-0.573314	0.427112
chr11	101334050	101334549	Nooverlap	1.96076	0.0124769	3.05387	0.00152308	-0.494933	0.577387
chr11	101334750	101335049	Nooverlap	1.52744	0.0430061	2.53371	0.00643807	-0.707095	0.38841
chr11	101416900	101417399	Stable	2.017	0.0120904	2.65613	0.00462841	-0.335362	0.606962
chr11	101425100	101425449	Nooverlap	1.87979	0.0165431	2.40258	0.00923131	-0.526635	0.495353
chr11	101425750	101425849	Nooverlap	-1.77262	0.167038	2.16141	0.0177304	-3.28517	0.251491
chr11	101442400	101443349	Nooverlap	2.75344	0.0127874	3.70597	0.00021505	-0.629764	0.408484
chr11	101551000	101551949	Nooverlap	2.94027	0.0111715	4.0171	8.05948e-05	-0.470266	0.519507
chr11	101552050	101552649	Nooverlap	3.39081	0.0111299	3.54412	0.000356917	-0.653813	0.408834
chr11	101552850	101553649	Nooverlap	2.97083	0.0111299	3.45307	0.000470788	-0.472566	0.486005
chr11	101626950	101627449	Stable	3.63055	0.0121423	3.45387	0.000470019	-0.387591	0.573199
chr11	101627950	101628599	Stable	2.6242	0.0111299	2.97034	0.00192754	-0.447874	0.506295
chr11	101641100	101641849	Stable	3.1869	0.0111299	4.44313	2.12162e-05	-1.36646	0.259776
chr11	101645850	101646449	Stable	3.54186	0.0111299	4.2009	4.53364e-05	-0.520304	0.452268
chr11	101657750	101658399	Stable	3.22364	0.0111299	4.44672	2.11192e-05	-1.12701	0.292021
chr11	101733050	101733549	Nooverlap	2.0935	0.0129166	3.13224	0.00122212	-0.900006	0.326579
chr11	101772100	101772549	Stable	2.58105	0.0112997	1.59694	0.075164	-0.158446	0.81087
chr11	101783950	101785349	Stable	2.43632	0.011319	3.03121	0.00162191	-0.530238	0.445982
chr11	101870200	101870449	Nooverlap	2.45463	0.0112008	2.26881	0.0132557	0.0597665	0.939272
chr11	101946800	101946899	Nooverlap	0.501035	0.314049	1.48856	0.0967561	-1.11359	0.3166
chr11	102026450	102026749	Stable	3.04136	0.0111299	2.56708	0.0058774	-0.805861	0.339396
chr11	102087800	102088049	Stable	1.79084	0.0891579	2.81012	0.00301988	-0.370424	0.608918
chr11	102088700	102089199	Stable	2.78442	0.0111874	1.64582	0.0668802	-0.191115	0.770436
chr11	102184300	102185449	Stable	2.61198	0.0111365	3.27137	0.000815833	-0.78884	0.358327
chr11	102189900	102190249	Stable	1.46672	0.0256203	2.17972	0.0168869	-0.865414	0.326026
chr11	102211300	102211599	Nooverlap	3.1827	0.0111299	0.0437898	0.961736	1.18127	0.266648
chr11	102219200	102219449	Nooverlap	1.28892	0.0234321	2.68487	0.00427819	-0.304078	0.639623
chr11	102229650	102230099	Stable	2.43616	0.0121053	3.07767	0.00143184	-0.105651	0.871508
chr11	102248950	102249499	Stable	2.37128	0.0143236	2.98632	0.00184201	-0.776931	0.347682
chr11	102284900	102285599	Nooverlap	2.98897	0.0112438	2.96335	0.00196395	-0.52688	0.476261
chr11	102295600	102297849	Nooverlap	3.29032	0.0111299	3.8514	0.000134778	-0.645929	0.3882
chr11	102309400	102309599	Nooverlap	1.79152	0.0912229	2.4191	0.00882272	-0.510089	0.504254
chr11	102316200	102320249	Stable	4.05116	0.0111299	4.72394	1.0149e-05	-0.862861	0.329317
chr11	102362700	102362849	Nooverlap	1.66211	0.0196325	1.98976	0.0280141	-0.0480918	0.942856
chr11	102406600	102408249	Stable	3.05706	0.0111299	2.86708	0.00258768	-0.660479	0.378186
chr11	102408750	102409049	Stable	2.35442	0.0141808	2.17202	0.0172493	-0.120747	0.856473
chr11	102430150	102430299	Nooverlap	0.395674	0.278965	1.71178	0.0569532	-0.889909	0.317575
chr11	102430700	102430949	Nooverlap	1.87999	0.0188053	2.63604	0.00488076	-0.715177	0.362583
chr11	102446950	102447599	Nooverlap	3.19553	0.0113494	2.69866	0.00411209	-0.892479	0.320292
chr11	102455850	102456049	Nooverlap	2.22308	0.0741361	0.649126	0.469751	0.0718395	0.928688
chr11	102555300	102556749	Nooverlap	3.33616	0.0111299	3.06895	0.00146561	-0.514308	0.47192
chr11	102594750	102594999	Nooverlap	1.2525	0.0266812	2.79357	0.00315513	-0.390824	0.567266
chr11	102595250	102595599	Nooverlap	2.36996	0.0271579	2.22131	0.0150668	-0.169419	0.803907
chr11	102595650	102595899	Nooverlap	2.49404	0.0111299	2.35582	0.0104714	0.179091	0.785101
chr11	102602600	102604149	Stable	2.7839	0.0113034	3.52441	0.000378889	-0.625002	0.395945
chr11	102604350	102608849	Stable	3.23394	0.0111299	3.51164	0.000394555	-0.420872	0.52813
chr11	102610900	102611399	Nooverlap	2.50585	0.0120961	2.71329	0.00394918	-0.369342	0.576656
chr11	102611700	102611899	Nooverlap	1.06963	0.0573194	2.23568	0.0145207	-0.48062	0.502502
chr11	102623700	102624349	Stable	2.06226	0.0147547	2.76832	0.00338101	-0.582961	0.418738
chr11	102624450	102624849	Stable	1.49235	0.0221122	2.85271	0.00269606	-0.864759	0.330028
chr11	102630250	102630449	Nooverlap	1.38723	0.0212667	2.20604	0.0157186	-0.486203	0.510817
chr11	102630750	102630899	Nooverlap	1.37857	0.0511119	1.72714	0.0548339	-0.709987	0.391599
chr11	102697500	102697749	Stable	2.96946	0.0183599	1.90274	0.0351726	-0.740019	0.362656
chr11	102774100	102774649	Stable	3.45669	0.0111299	2.86844	0.00257714	-0.0127669	0.98634
chr11	102817650	102819749	Stable	4.00322	0.0111299	4.69809	1.0937e-05	-0.896986	0.326269
chr11	102820000	102820199	Stable	1.61698	0.0394309	2.7823	0.00325299	-1.31162	0.264866
chr11	102880350	102881549	Stable	3.34537	0.0111299	3.66943	0.00024264	-0.77062	0.361153
chr11	102924350	102925849	Stable	2.58299	0.0146246	3.55207	0.000347784	-0.646323	0.394248
chr11	102963600	102963849	Nooverlap	2.46384	0.0276524	2.62354	0.00505258	-0.554368	0.449185
chr11	102964100	102964349	Nooverlap	1.77759	0.0141329	1.79779	0.0459844	-0.16195	0.805455
chr11	103016350	103017199	Stable	3.38858	0.0111299	4.02637	7.88349e-05	-0.801045	0.338991
chr11	103027700	103028899	Stable	2.48201	0.0128464	3.45607	0.000466443	-0.928002	0.330833
chr11	103115100	103115999	Nooverlap	3.09409	0.0111299	3.33531	0.000673655	-0.969141	0.325052
chr11	103131750	103133049	Nooverlap	3.82088	0.0111299	4.29089	3.46119e-05	-0.841326	0.348724
chr11	103142550	103142899	Nooverlap	3.32651	0.0111299	2.24333	0.0142138	0.109912	0.867957
chr11	103267050	103267399	Stable	1.67847	0.0162352	2.64347	0.004787	-0.475223	0.487561
chr11	103267900	103268099	Stable	2.60702	0.0134908	3.10653	0.00131601	-0.166895	0.80186
chr11	103412350	103412599	Nooverlap	2.51623	0.0111299	1.82857	0.0425479	-0.117281	0.875263
chr11	103688400	103688699	Nooverlap	0.785727	0.225261	2.72803	0.00378869	-0.535013	0.473219
chr11	103696950	103698349	Stable	3.64281	0.0111299	3.70257	0.000217522	-0.488349	0.47436
chr11	103953650	103953999	Nooverlap	2.1032	0.0185452	2.74617	0.00360473	-0.512124	0.493371
chr11	103966700	103967499	Nooverlap	2.21106	0.0135099	3.06194	0.00149296	-0.433479	0.532671
chr11	104289600	104290099	Stable	2.21486	0.0171823	2.9031	0.0023334	-0.437493	0.519613
chr11	104440500	104442999	Stable	4.32886	0.0111299	4.95706	5.51433e-06	-0.827513	0.335992
chr11	104468650	104469599	Nooverlap	3.52486	0.0111299	3.95291	9.76569e-05	-0.59241	0.42742
chr11	104549500	104550599	Nooverlap	4.18538	0.0111299	4.40364	2.40852e-05	-0.614482	0.4194
chr11	104550800	104551299	Nooverlap	1.02672	0.135641	2.7888	0.0031927	-0.520878	0.51333
chr11	104624900	104625049	Nooverlap	2.23083	0.0394752	0.903482	0.312769	0.885039	0.329259
chr11	105126450	105127049	Nooverlap	1.79381	0.0584651	2.48864	0.00728683	-0.723095	0.37635
chr11	105153000	105153499	Nooverlap	1.87857	0.054695	3.0059	0.00174369	-0.968396	0.336913
chr11	105153800	105154649	Nooverlap	1.5798	0.0403639	3.05445	0.00152145	-1.57946	0.259589
chr11	105180400	105182849	Stable	3.82899	0.0111299	4.58034	1.50192e-05	-0.763656	0.351553
chr11	105282250	105282549	Nooverlap	2.79937	0.0316471	1.32264	0.139532	-0.480904	0.510817
chr11	105282950	105283149	Nooverlap	1.06963	0.0573194	2.37132	0.0100334	-0.875498	0.324019
chr11	105291750	105294299	Stable	3.21652	0.0111299	3.87066	0.000127209	-0.599249	0.408284
chr11	105294350	105294549	Nooverlap	0.992613	0.176827	2.98596	0.00184371	-0.7517	0.36361
chr11	105311400	105311549	Nooverlap	2.48586	0.0232945	2.82913	0.00287164	-0.42443	0.564561
chr11	105312100	105313049	Nooverlap	2.60143	0.0127636	2.48332	0.00739679	-0.776863	0.345276
chr11	105313350	105313849	Nooverlap	2.25266	0.018927	2.99071	0.00181916	-0.6072	0.424219
chr11	105589500	105589699	Stable	2.36996	0.0271579	2.02024	0.0258639	0.0316511	0.964543
chr11	105589900	105590249	Stable	2.85649	0.0111299	3.194	0.00101814	0.182265	0.785272
chr11	105758750	105759099	Nooverlap	2.99707	0.0111299	3.42992	0.000507269	-0.452732	0.500812
chr11	105759500	105759699	Nooverlap	0.984624	0.045663	2.04658	0.0241367	-0.635766	0.389126
chr11	105801850	105802099	Nooverlap	-0.00167655	0.997648	2.16165	0.017728	-1.83072	0.258446
chr11	106036900	106037249	Nooverlap	2.30863	0.0113381	2.79582	0.00313678	-0.639611	0.402129
chr11	106066350	106066749	Nooverlap	2.56303	0.0357703	3.17854	0.00106558	-0.282903	0.686874
chr11	106083750	106084199	Nooverlap	2.76182	0.0111299	3.07653	0.0014364	-0.347865	0.597277
chr11	106084550	106085499	Nooverlap	3.57743	0.0111299	4.17748	4.87265e-05	-0.669311	0.390564
chr11	106134800	106135149	Nooverlap	0.849566	0.0600639	2.41021	0.00904439	-0.811726	0.339404
chr11	106158950	106161699	Stable	3.74032	0.0111299	4.16602	5.05988e-05	-0.763373	0.355171
chr11	106193100	106193499	Nooverlap	2.32688	0.0114089	2.5206	0.00666508	-0.633321	0.406755
chr11	106193750	106194049	Nooverlap	3.08983	0.0117433	2.15361	0.018111	0.0651391	0.923912
chr11	106215800	106217699	Stable	2.88179	0.0111299	3.96271	9.50129e-05	-0.9212	0.310493
chr11	106255250	106256699	Nooverlap	2.76878	0.0111299	3.70122	0.000218455	-0.914631	0.329317
chr11	106267500	106268049	Stable	1.13081	0.034479	3.17078	0.00109106	-1.29105	0.261306
chr11	106268350	106268749	Stable	1.7539	0.0177242	2.61328	0.00519714	-0.913236	0.326576
chr11	106269000	106269299	Stable	2.19401	0.0133063	3.50157	0.00040818	-0.471541	0.499563
chr11	106272100	106272899	Stable	2.96985	0.0111299	3.80482	0.000157176	-0.707397	0.380673
chr11	106273200	106273749	Stable	2.20992	0.0233858	2.70683	0.00402258	-0.750617	0.35894
chr11	106314400	106314649	Nooverlap	1.45129	0.0235713	3.13431	0.00121522	-1.16324	0.290839
chr11	106316300	106316549	Nooverlap	1.28564	0.0293857	2.75796	0.00348265	-1.04613	0.306508
chr11	106316750	106317449	Nooverlap	1.2501	0.0317053	2.52258	0.00662758	-0.682356	0.38312
chr11	106487100	106487849	Nooverlap	2.45483	0.0111365	3.39676	0.000558351	-0.782997	0.348377
chr11	106500300	106500599	Nooverlap	1.50453	0.0398302	2.52064	0.00666478	-0.716925	0.371943
chr11	106500850	106502149	Nooverlap	4.1384	0.0111299	3.96278	9.50129e-05	-0.702598	0.372025
chr11	106526500	106526849	Nooverlap	1.3601	0.159585	2.80822	0.00303458	-1.02193	0.345904
chr11	106612500	106612999	Nooverlap	3.91912	0.0111299	1.93831	0.0320655	-0.32251	0.621825
chr11	106658100	106658449	Nooverlap	1.2892	0.0236746	3.2363	0.000902977	-0.256546	0.695631
chr11	106660700	106660899	Nooverlap	0.826571	0.0725121	2.79496	0.00314259	-0.726747	0.387632
chr11	106714800	106715049	Nooverlap	0.717236	0.309229	2.3913	0.0095051	-1.0993	0.300457
chr11	106779150	106779449	Nooverlap	2.51135	0.0111299	2.45155	0.00807104	-0.335933	0.60677
chr11	106779500	106779749	Nooverlap	2.41989	0.0117433	1.75566	0.0510676	0.0498944	0.946135
chr11	106787000	106789999	Stable	4.02149	0.0111299	4.29502	3.41305e-05	-0.749412	0.352648
chr11	106919750	106920849	Stable	3.69017	0.0111299	3.72983	0.000198654	-0.812911	0.34413
chr11	106998100	106998249	Nooverlap	1.60825	0.0935698	1.83108	0.0422907	0.210915	0.791752
chr11	106998550	106999549	Nooverlap	2.95393	0.0111299	3.56977	0.000329883	-0.544553	0.437211
chr11	106999750	106999949	Nooverlap	2.238	0.0189093	1.06407	0.234387	-0.0865237	0.897049
chr11	107012200	107012649	Stable	2.13522	0.0170687	2.84035	0.00278178	-0.569126	0.448913
chr11	107130500	107132599	Stable	3.53751	0.0111299	4.0162	8.0728e-05	-0.504125	0.464933
chr11	107188600	107189299	Nooverlap	2.41687	0.0112393	2.88798	0.00243645	-0.499388	0.465611
chr11	107413850	107413949	Nooverlap	2.84049	0.0211713	3.21962	0.000946747	0.485152	0.515361
chr11	107468900	107472599	Stable	2.5524	0.0111299	3.3255	0.000694601	-0.732607	0.360812
chr11	107479450	107480299	Nooverlap	3.18704	0.0111299	3.60905	0.000292874	-0.7788	0.355698
chr11	107546450	107546649	Nooverlap	2.08906	0.0345638	2.40164	0.00925235	-0.960054	0.310605
chr11	107547000	107548549	Stable	2.89374	0.0111365	2.95476	0.00200872	-0.77709	0.358378
chr11	107683750	107683949	Nooverlap	0.580856	0.420186	3.23578	0.000903748	-1.24763	0.267029
chr11	107684650	107684799	Nooverlap	0.78238	0.18831	1.55964	0.0820789	-0.34352	0.614115
chr11	107987450	107987599	Nooverlap	2.38163	0.0112691	-0.441833	0.623853	0.784621	0.340212
chr11	108425250	108425849	Nooverlap	2.69662	0.0116612	3.06027	0.00150014	-0.617362	0.401562
chr11	108527850	108527999	Nooverlap	1.06282	0.0527236	2.02985	0.0252196	-0.786212	0.369286
chr11	108551850	108551949	Nooverlap	0.891337	0.130395	2.97677	0.00189314	-0.684424	0.417723
chr11	108552700	108553699	Nooverlap	1.12649	0.0337267	3.05881	0.00150414	-0.851568	0.359028
chr11	108587400	108587649	Nooverlap	2.21352	0.0188095	1.63906	0.0679813	0.0224342	0.976609
chr11	108620300	108620899	Nooverlap	0.993617	0.0383377	2.55909	0.00600417	-1.8965	0.258446
chr11	108621400	108621799	Nooverlap	1.65223	0.0178171	2.62864	0.00498047	-1.13275	0.310605
chr11	108621850	108622449	Nooverlap	0.0186633	0.971147	3.804	0.000157488	-2.06046	0.258446
chr11	108891400	108891849	Nooverlap	2.19465	0.0184546	2.23896	0.0143927	-0.423152	0.543133
chr11	108892050	108892299	Nooverlap	1.65517	0.131598	3.08479	0.00140467	-0.780763	0.382795
chr11	108920000	108923049	Stable	3.71945	0.0111299	4.46898	1.97579e-05	-1.09547	0.290508
chr11	108923100	108924099	Nooverlap	2.68356	0.0111299	3.35362	0.000637593	-0.965651	0.320317
chr11	108928900	108929149	Nooverlap	0.466971	0.258289	3.107	0.00131389	-0.172874	0.816746
chr11	108935950	108936099	Nooverlap	1.89141	0.0304462	2.66811	0.00448101	-0.321135	0.669692
chr11	108936900	108937099	Nooverlap	0.850416	0.455334	1.82959	0.0424434	-0.646564	0.452578
chr11	108946700	108947299	Stable	1.4867	0.0213358	2.98011	0.00187501	-0.725031	0.483334
chr11	108947750	108948699	Stable	2.61239	0.0111299	3.43886	0.000491599	-0.992113	0.327053
chr11	108948750	108949049	Nooverlap	3.03509	0.0142765	1.57111	0.079886	0.183838	0.809976
chr11	108961950	108962449	Nooverlap	1.6801	0.064883	2.80213	0.0030889	-1.01873	0.323065
chr11	109091750	109091899	Nooverlap	2.58927	0.0320752	0.378589	0.674555	0.00350087	0.996624
chr11	109252050	109252199	Nooverlap	0.136989	0.916755	2.4506	0.00809033	-2.96108	0.258446
chr11	109252450	109252599	Nooverlap	1.2952	0.0289654	3.16339	0.00111461	-1.41263	0.258446
chr11	109269450	109269749	Stable	1.97818	0.0123239	2.65965	0.00458281	-0.714624	0.366705
chr11	109269900	109270149	Stable	0.946754	0.0581512	2.54406	0.00625915	-0.870848	0.331522
chr11	109270300	109271099	Stable	1.76261	0.0271813	3.00387	0.00175324	-1.25426	0.261287
chr11	109312350	109312549	Nooverlap	2.54638	0.0115867	0.459399	0.6099	0.416535	0.532691
chr11	109362250	109363799	Stable	3.389	0.0111299	4.19745	4.57368e-05	-0.655125	0.415465
chr11	109426050	109426649	Stable	2.09638	0.0119476	3.91938	0.000109236	-0.474448	0.484045
chr11	109472750	109474449	Stable	3.81425	0.0111299	3.30295	0.000742483	-0.554708	0.431623
chr11	109592750	109592899	Nooverlap	0.629837	0.305085	1.62554	0.070241	-0.663091	0.458896
chr11	109593550	109593749	Nooverlap	1.23522	0.0418182	2.59136	0.0055041	-0.520111	0.455418
chr11	109594000	109594199	Nooverlap	1.10223	0.226675	2.35877	0.0103894	-0.901439	0.336167
chr11	109610550	109610699	Nooverlap	2.01605	0.0120729	2.01725	0.0260625	-0.12726	0.855664
chr11	109610750	109611499	Nooverlap	3.22122	0.0111299	2.47544	0.00756335	-0.465939	0.494596
chr11	109616000	109616299	Nooverlap	0.440387	0.184046	3.18018	0.00105978	-1.7711	0.258446
chr11	109616650	109617199	Nooverlap	1.39287	0.0226719	2.95785	0.00199255	-1.05312	0.351038
chr11	109650300	109652149	Nooverlap	3.78309	0.0111299	4.3053	3.32582e-05	-0.846967	0.338968
chr11	109652300	109652399	Nooverlap	0.64759	0.320637	1.93827	0.0320655	-1.10986	0.286599
chr11	109899750	109900449	Nooverlap	1.39907	0.0230848	2.66002	0.00457785	-1.95275	0.258446
chr11	109900800	109902749	Nooverlap	2.82826	0.0111299	4.07443	6.77225e-05	-1.34359	0.283041
chr11	109902900	109904249	Nooverlap	2.46938	0.0113282	3.48913	0.000423743	-1.14795	0.304269
chr11	109909300	109909599	Nooverlap	1.14788	0.103061	2.97394	0.00190724	-1.33628	0.284764
chr11	109910000	109910199	Nooverlap	0.917133	0.103533	2.17913	0.0169164	-1.05548	0.305584
chr11	109910250	109910749	Nooverlap	1.91555	0.0170996	3.12246	0.0012582	-0.544315	0.520254
chr11	109995250	109995599	Nooverlap	1.47216	0.0833581	2.1856	0.0166179	-0.863164	0.394867
chr11	109995850	109996149	Nooverlap	1.0294	0.0599042	3.13014	0.00122983	-1.0494	0.299804
chr11	110165650	110166199	Nooverlap	0.874554	0.129383	2.79202	0.00316707	-1.34869	0.281405
chr11	110187400	110187549	Nooverlap	2.57096	0.0164096	0.38284	0.671063	1.13504	0.276813
chr11	110302350	110302549	Nooverlap	1.43835	0.0389337	1.87549	0.0377164	-0.563192	0.44422
chr11	110303150	110303349	Nooverlap	0.678343	0.125169	1.81433	0.0441187	-0.561221	0.487589
chr11	110303750	110304149	Nooverlap	2.26858	0.0259667	2.60295	0.00534959	-0.625395	0.442133
chr11	110337500	110337749	Nooverlap	2.58761	0.0123074	1.93201	0.0325861	0.544858	0.441877
chr11	110372200	110372349	Nooverlap	1.19728	0.0444897	1.6578	0.0649675	-0.180959	0.824527
chr11	110399350	110399549	Nooverlap	1.65944	0.0675321	1.94801	0.0312907	0.360289	0.719029
chr11	110399650	110399849	Nooverlap	1.98676	0.0300642	2.90645	0.00230774	-0.270831	0.688182
chr11	110438650	110438749	Nooverlap	0.855372	0.18831	0.93741	0.294898	0.504402	0.639923
chr11	110448950	110449199	Nooverlap	1.43808	0.0195203	3.57066	0.000328825	-0.15898	0.806275
chr11	110567350	110567449	Nooverlap	1.62107	0.0741361	2.94356	0.00207379	0.078511	0.915091
chr11	110649300	110649649	Nooverlap	2.55139	0.0157843	2.65357	0.00465771	-0.907112	0.355732
chr11	110650300	110650549	Nooverlap	0.274188	0.791295	2.22548	0.0149066	-1.69726	0.281405
chr11	110667950	110668099	Nooverlap	0.759876	0.0989847	1.80045	0.0456804	-1.15132	0.266648
chr11	110957300	110957449	Nooverlap	1.29159	0.0243949	1.82129	0.043373	-1.08172	0.318424
chr11	111009300	111009449	Nooverlap	0.779164	0.164355	1.92598	0.0331015	-0.965992	0.314411
chr11	111065700	111065999	Nooverlap	3.01512	0.0111299	1.23767	0.1667	0.856239	0.323075
chr11	111300500	111300799	Nooverlap	0.51735	0.13238	2.98845	0.00182928	-1.32085	0.260378
chr11	111539850	111540049	Nooverlap	0.323052	0.296321	3.04674	0.00155225	-1.16782	0.276179
chr11	111540600	111540899	Nooverlap	0.44267	0.447316	2.61256	0.00520503	-1.90935	0.258446
chr11	111541100	111541499	Nooverlap	0.261465	0.359368	3.77918	0.000169596	-2.57159	0.258446
chr11	111541900	111542199	Nooverlap	0.308919	0.416335	3.1409	0.00119115	-1.54704	0.270102
chr11	111562850	111563099	Stable	0.516202	0.28567	1.69854	0.0588403	-1.86134	0.258446
chr11	111563650	111564099	Stable	1.23853	0.0273213	3.25364	0.000858268	-1.44433	0.264033
chr11	111566700	111566899	Nooverlap	1.369	0.0451915	2.06796	0.0227928	-1.03586	0.350372
chr11	111567000	111567449	Nooverlap	0.238464	0.471336	2.59866	0.00539539	-1.53126	0.262225
chr11	111567850	111568049	Nooverlap	1.35529	0.0288635	1.93296	0.0325137	-1.38261	0.261306
chr11	111568200	111568949	HH-Sensitive	1.17614	0.0330717	2.96131	0.00197355	-1.6154	0.258945
chr11	111569150	111569699	HH-Sensitive	0.827539	0.0575814	2.78336	0.00324233	-1.87287	0.258446
chr11	111578300	111578749	Nooverlap	0.909276	0.0629704	2.75912	0.00347307	-1.52784	0.258446
chr11	111583650	111583749	Nooverlap	0.501527	0.599523	2.82987	0.0028674	-1.48248	0.261684
chr11	111647900	111648099	Nooverlap	0.534505	0.425047	2.28249	0.0127671	-1.06256	0.293116
chr11	111652350	111652649	Nooverlap	0.826524	0.0707208	2.44757	0.00816188	-0.785018	0.371464
chr11	111658500	111658999	Nooverlap	0.701837	0.0817394	2.67629	0.00438688	-1.05721	0.289355
chr11	111666650	111666899	Nooverlap	1.3277	0.0384407	2.15626	0.0179771	-0.495955	0.513698
chr11	111715200	111715449	Nooverlap	0.337426	0.296321	2.08208	0.0219444	-1.89095	0.258446
chr11	111715900	111716299	Nooverlap	0.304377	0.368133	2.1532	0.0181328	-1.33696	0.289709
chr11	111731700	111732049	Nooverlap	0.0540518	0.95343	2.1259	0.0195166	-0.922455	0.361058
chr11	111740050	111740299	Nooverlap	1.39052	0.0640902	2.55289	0.00611072	-1.7767	0.258446
chr11	111740800	111741199	Nooverlap	0.949931	0.158868	2.40978	0.00905013	-1.49301	0.272435
chr11	111741550	111741749	Nooverlap	-0.791307	0.0587971	2.0354	0.0248525	-2.54714	0.251491
chr11	111743650	111743899	Nooverlap	1.05267	0.150095	2.28632	0.0126483	-1.11617	0.281394
chr11	111817450	111817999	Nooverlap	0.907789	0.0774816	3.32834	0.000687678	-1.6941	0.259589
chr11	111818450	111821799	Nooverlap	1.37433	0.0206747	3.30791	0.000732058	-1.73273	0.258945
chr11	111827850	111828499	Stable	0.98546	0.14084	2.66933	0.00446831	-1.36546	0.261684
chr11	111829000	111829199	Stable	0.72633	0.18835	2.50818	0.00690451	-1.13299	0.284149
chr11	111843000	111844699	Nooverlap	1.94371	0.0139023	3.39939	0.000554345	-1.38209	0.267661
chr11	111844850	111845199	Nooverlap	1.38673	0.0653647	2.4302	0.00854849	-1.10556	0.311237
chr11	111961200	111961449	Nooverlap	0.958452	0.117096	2.32028	0.0115093	-1.15531	0.284537
chr11	111961600	111961799	Nooverlap	0.819829	0.243252	2.65422	0.00465053	-1.34461	0.269936
chr11	111962100	111962599	Nooverlap	2.44276	0.0136646	2.70555	0.00403279	-1.21373	0.280293
chr11	111963800	111964049	Nooverlap	0.2471	0.464955	2.86901	0.00257237	-1.78791	0.258446
chr11	112239400	112239549	Nooverlap	0.539163	0.292692	1.87464	0.0377933	-1.07493	0.287808
chr11	112282650	112282999	Nooverlap	1.18767	0.0282005	2.86016	0.00264295	-1.81879	0.258446
chr11	112411350	112411549	Nooverlap	-0.00148364	0.997648	2.56592	0.00589553	-1.91855	0.258446
chr11	112411650	112412399	Nooverlap	1.27498	0.146014	2.88332	0.00246629	-1.27882	0.277841
chr11	112412700	112413199	Nooverlap	0.904043	0.142854	2.54725	0.0062036	-1.89215	0.258446
chr11	112449750	112450449	Stable	1.40877	0.033402	2.92536	0.00219001	-1.21282	0.273687
chr11	112450650	112450899	Stable	0.568434	0.188001	2.26471	0.0134083	-1.2739	0.261306
chr11	112455200	112455699	Nooverlap	1.07117	0.0583601	3.12773	0.0012384	-1.34711	0.277841
chr11	112526150	112526699	Nooverlap	2.02368	0.0127925	2.89344	0.00239588	-0.923627	0.329076
chr11	112527100	112527249	Nooverlap	0.881329	0.342561	2.25261	0.0138536	-1.03867	0.325052
chr11	112562800	112563099	Stable	2.18078	0.0234596	2.63999	0.00482909	-0.762354	0.372827
chr11	112563400	112563699	Stable	1.47074	0.110694	2.14754	0.0184049	-1.39715	0.274344
chr11	112648550	112648999	Stable	1.49425	0.047677	3.2126	0.00096471	-0.886687	0.354194
chr11	112649450	112649749	Stable	1.91071	0.0269211	2.07354	0.0224459	-0.883177	0.400374
chr11	112781550	112781799	Nooverlap	1.55773	0.0212685	2.86114	0.0026346	-0.654555	0.383075
chr11	112781950	112783299	Nooverlap	2.80817	0.0111299	2.72149	0.00386362	-0.643749	0.408484
chr11	112870450	112870699	Nooverlap	0.60475	0.102687	2.81639	0.00297316	-1.26551	0.259776
chr11	112976600	112976949	Nooverlap	2.33101	0.0231332	2.2422	0.0142603	-1.14828	0.276258
chr11	112977200	112977899	Nooverlap	2.53178	0.011981	3.03661	0.00159822	-0.870068	0.347038
chr11	112978050	112978199	Nooverlap	1.16354	0.0734506	2.71565	0.00392498	-0.497635	0.498749
chr11	112983300	112983599	Nooverlap	1.15136	0.0348147	2.68077	0.00433095	-1.03962	0.320919
chr11	113001850	113002049	Nooverlap	0.791449	0.333001	1.32891	0.137647	-0.679207	0.424399
chr11	113013600	113014299	Stable	2.2874	0.0112691	3.63705	0.000269034	-1.17407	0.284149
chr11	113014350	113015699	Stable	2.28664	0.0136448	2.96865	0.00193703	-0.988548	0.339504
chr11	113164500	113164749	Nooverlap	1.73807	0.0306538	2.72836	0.00378611	-0.809469	0.338163
chr11	113382550	113382899	Nooverlap	0.201097	0.616363	2.64148	0.00481278	-0.939941	0.333146
chr11	113439350	113439549	Nooverlap	1.85783	0.0134286	1.57763	0.078635	-0.0812189	0.901507
chr11	113452700	113452899	Nooverlap	1.6314	0.167346	2.20519	0.0157414	-1.18813	0.300457
chr11	113453050	113453399	Nooverlap	1.78949	0.0309529	2.46026	0.00789335	-0.825347	0.341577
chr11	113453750	113453949	Nooverlap	2.62661	0.0134217	1.1207	0.210405	0.414064	0.584296
chr11	113649300	113650299	Nooverlap	2.8536	0.0111299	3.75815	0.000181814	-0.83098	0.336167
chr11	113651250	113651349	Nooverlap	2.08757	0.0282604	2.66312	0.00453923	-0.119985	0.858309
chr11	113683150	113684949	Stable	3.09224	0.0111299	4.03646	7.60665e-05	-0.832229	0.340425
chr11	113710250	113710849	Stable	2.07032	0.0134203	2.10153	0.020869	-0.193835	0.769145
chr11	113727850	113728099	Nooverlap	1.39618	0.0438226	2.35544	0.0104775	-0.439482	0.520699
chr11	113728350	113728599	Nooverlap	2.44857	0.0121768	1.82079	0.0434089	-0.652377	0.385325
chr11	113732400	113732499	Nooverlap	2.3819	0.129243	-1.10985	0.21477	1.86318	0.258446
chr11	113749300	113751849	Stable	3.31469	0.0111299	4.05033	7.2901e-05	-0.612807	0.399463
chr11	113751950	113752249	Nooverlap	2.18812	0.0117015	2.45019	0.00809951	-0.701677	0.368272
chr11	113784800	113786749	Stable	3.06169	0.0111299	3.13411	0.0012159	-0.798462	0.343101
chr11	113806950	113807199	Nooverlap	1.01374	0.0485332	3.79285	0.000162489	-0.212891	0.751515
chr11	114028150	114028449	Nooverlap	0.926385	0.0444698	2.6094	0.00525427	-1.19323	0.277332
chr11	114047700	114048049	Nooverlap	2.3458	0.038218	1.43897	0.10824	0.0621737	0.93043
chr11	114066750	114067149	Nooverlap	3.46884	0.0302896	1.74067	0.0530322	-0.22947	0.75677
chr11	114553950	114554099	Nooverlap	1.16354	0.0629375	2.08522	0.0217538	-0.466111	0.522378
chr11	114554350	114554499	Nooverlap	1.43013	0.161706	1.95358	0.0308296	-0.40596	0.586892
chr11	114567100	114567249	Stable	3.14695	0.014186	0.908127	0.310277	0.610256	0.41809
chr11	114668500	114669899	Nooverlap	3.3668	0.0111299	3.82386	0.000147065	-0.626231	0.401548
chr11	114685050	114685299	Nooverlap	2.41762	0.0111365	1.74351	0.0526501	0.231802	0.730218
chr11	114819600	114819799	Nooverlap	1.02	0.111142	1.89876	0.0355188	-0.0427327	0.95109
chr11	114823150	114823499	Nooverlap	1.41443	0.0700268	2.95386	0.00201271	-0.706781	0.403727
chr11	114829550	114830249	Nooverlap	2.73708	0.0111365	2.36222	0.010297	-0.576524	0.425726
chr11	114830300	114830949	Nooverlap	2.18215	0.017834	2.74143	0.00365691	-0.203545	0.780972
chr11	114852100	114852449	Nooverlap	1.87174	0.0240198	3.03939	0.0015855	-0.647871	0.389261
chr11	115099300	115099549	Nooverlap	2.07163	0.0129109	1.66692	0.0635457	-0.315643	0.641464
chr11	115100400	115100699	Stable	1.31812	0.0304257	2.1192	0.0198759	-0.804925	0.366384
chr11	115101200	115101499	Stable	1.48344	0.0351107	2.15057	0.0182612	-0.827275	0.370864
chr11	115163400	115163599	Nooverlap	1.5306	0.0914442	1.76399	0.0500242	-0.368821	0.618091
chr11	115187000	115187299	None	1.658	0.0171671	2.59428	0.00546029	-0.361513	0.594722
chr11	115276700	115276999	Nooverlap	2.33986	0.0112008	2.52259	0.00662753	-0.687963	0.381104
chr11	115277400	115277949	Nooverlap	2.50598	0.0127074	2.58464	0.00560578	-0.369691	0.588556
chr11	115381800	115382399	Nooverlap	2.61537	0.0111299	3.15739	0.00113455	-0.801154	0.339404
chr11	115403700	115404499	Stable	2.24636	0.0113594	3.56647	0.000333461	-0.642441	0.403198
chr11	115413300	115413799	Nooverlap	2.64753	0.0112008	4.0978	6.31837e-05	-1.03176	0.299261
chr11	115419300	115419949	Stable	1.73692	0.0643748	2.92763	0.00217532	-1.05028	0.30906
chr11	115420100	115420899	Stable	3.29256	0.0111299	3.78788	0.000165095	-0.581496	0.436732
chr11	115449350	115449499	Nooverlap	0.22633	0.55659	2.23398	0.0145769	-0.953177	0.326269
chr11	115475900	115476049	Nooverlap	0.404181	0.378748	2.22471	0.014931	-0.0067862	0.992737
chr11	115491550	115491849	Nooverlap	1.66089	0.0189403	3.10581	0.00131855	-0.443249	0.513034
chr11	115513150	115514399	Nooverlap	3.01177	0.0111299	3.25785	0.000848751	-0.499014	0.465431
chr11	115534800	115534999	Nooverlap	2.41762	0.0111365	1.97464	0.0291769	0.000671733	0.999253
chr11	115535050	115536349	Nooverlap	3.94314	0.0111299	4.48888	1.88353e-05	-1.0327	0.293594
chr11	115536450	115536849	Nooverlap	1.80555	0.0196934	2.50541	0.0069592	-0.61691	0.416447
chr11	115563700	115565099	Stable	3.19769	0.0111299	4.21592	4.29006e-05	-1.01216	0.303431
chr11	115603200	115604749	Nooverlap	3.84952	0.0111299	4.30177	3.34868e-05	-1.10269	0.304418
chr11	115612650	115612999	Nooverlap	1.72087	0.0459272	2.40742	0.00910649	-0.43252	0.537393
chr11	115627800	115627899	Nooverlap	1.14776	0.0323304	0.437305	0.627452	-0.262814	0.709922
chr11	115707750	115708599	Stable	3.27724	0.0112008	3.9352	0.000103501	-0.6521	0.389664
chr11	115708900	115709249	Stable	2.42032	0.0164663	1.80865	0.0447657	-0.0250406	0.970441
chr11	115764900	115765299	Nooverlap	2.60232	0.0229494	3.35601	0.000634056	-0.319956	0.643596
chr11	115765400	115766299	Nooverlap	2.92123	0.0111299	3.89367	0.000118835	-0.761898	0.359513
chr11	115812850	115813799	Stable	2.87272	0.0111299	5.20323	4.28805e-06	-0.990951	0.299804
chr11	115814800	115815299	Nooverlap	2.27065	0.0119476	2.71784	0.00390123	-0.719738	0.36361
chr11	115831250	115831499	Nooverlap	1.17241	0.149577	2.75887	0.00347479	-1.06668	0.305842
chr11	115831700	115833649	Nooverlap	2.19912	0.0114104	2.92674	0.0021818	-1.00606	0.320317
chr11	115833850	115834049	Nooverlap	1.53951	0.0802079	2.56476	0.00591261	-0.907762	0.331405
chr11	115834400	115834799	Nooverlap	2.37656	0.0111365	2.05434	0.0236452	-0.809977	0.361775
chr11	115933250	115933549	Nooverlap	1.3269	0.0247105	2.5373	0.00637105	-1.19449	0.266648
chr11	115933650	115934099	Nooverlap	2.15038	0.0115153	2.88085	0.00248471	-0.234866	0.722482
chr11	115958550	115958699	Nooverlap	2.599	0.0111299	0.875329	0.328184	1.20731	0.274344
chr11	116011850	116012049	Nooverlap	0.714322	0.117234	2.41272	0.00897764	-0.696723	0.371343
chr11	116012200	116012699	Stable	2.67765	0.01284	3.22053	0.000944712	-0.699223	0.367334
chr11	116022750	116022849	Nooverlap	-0.163965	0.5798	1.32137	0.139914	-0.651332	0.389144
chr11	116023500	116024599	Nooverlap	3.69058	0.0111299	4.10164	6.24815e-05	-0.579308	0.416739
chr11	116030200	116031449	Stable	4.08092	0.0111299	4.77569	8.79476e-06	-0.775951	0.343914
chr11	116078850	116079549	Nooverlap	1.79945	0.040634	2.67689	0.00437911	-0.79311	0.390564
chr11	116086450	116086599	Nooverlap	2.117	0.0263807	2.37452	0.00994214	0.328919	0.625394
chr11	116086700	116086999	Nooverlap	3.18286	0.0124428	2.09273	0.0213208	-0.477211	0.493996
chr11	116130850	116131149	Nooverlap	1.89273	0.0470869	3.30713	0.000733603	-0.578368	0.446338
chr11	116138100	116138799	Nooverlap	2.4172	0.0152584	3.467	0.000452076	-0.396167	0.574887
chr11	116167500	116168199	Nooverlap	2.43254	0.0111365	3.04097	0.00157875	-0.55178	0.441962
chr11	116198750	116199499	Stable	3.93066	0.0111299	3.3077	0.000732494	-0.766391	0.36361
chr11	116239450	116239799	Nooverlap	0.750679	0.105868	2.30367	0.0120575	-0.653451	0.408275
chr11	116241250	116243149	Nooverlap	2.49376	0.0119984	3.42179	0.000519465	-0.980761	0.31517
chr11	116273500	116274649	Nooverlap	2.5156	0.0124722	2.97435	0.00190574	-0.582714	0.421621
chr11	116306450	116306649	Nooverlap	2.30873	0.0175339	2.21031	0.0155414	-0.874851	0.353978
chr11	116335650	116335799	Nooverlap	1.46364	0.0675253	2.02428	0.0255873	-0.922063	0.317575
chr11	116412900	116413549	Nooverlap	1.73519	0.0247005	2.68713	0.0042499	-0.668339	0.400363
chr11	116418300	116419199	Stable	2.06593	0.0124722	2.84989	0.00271898	-0.878672	0.325783
chr11	116433300	116433799	Nooverlap	2.44758	0.0159477	2.99036	0.00182128	-0.325985	0.625496
chr11	116434150	116435349	Nooverlap	5.06744	0.0111299	4.05142	7.26407e-05	-0.252102	0.701736
chr11	116489600	116490999	Nooverlap	2.28295	0.0118435	3.18411	0.00104702	-0.796003	0.358439
chr11	116573100	116573299	Nooverlap	-1.48415	0.480096	2.76543	0.00341041	-2.69372	0.258446
chr11	116580650	116581449	Nooverlap	2.76799	0.0111299	3.19159	0.00102434	-0.944494	0.303736
chr11	116630300	116630649	Nooverlap	1.32649	0.0879292	2.1222	0.0197141	-0.754831	0.363594
chr11	116631400	116631499	Nooverlap	0.662196	0.115611	1.58987	0.0764286	-0.0818042	0.904115
chr11	116645200	116645549	Nooverlap	2.14879	0.0404712	2.57844	0.00569826	-0.00346089	0.996482
chr11	116646000	116646349	Nooverlap	3.03415	0.0127884	1.71562	0.0564237	-0.763773	0.350348
chr11	116648350	116648899	Nooverlap	2.3225	0.0148753	2.59563	0.00543944	-0.267262	0.693622
chr11	116657400	116657899	Nooverlap	2.58096	0.0160405	2.50232	0.00701572	0.264177	0.689417
chr11	116658200	116658349	Nooverlap	0.665924	0.0825498	1.79202	0.0466776	-0.699906	0.363822
chr11	116671500	116672549	Nooverlap	3.05	0.0111299	3.82049	0.000148611	-0.500045	0.482632
chr11	116782850	116783249	Nooverlap	1.43873	0.0653358	2.7558	0.00350564	-0.676006	0.386063
chr11	116813950	116814549	Nooverlap	1.59358	0.0412242	2.56049	0.00598253	-0.868411	0.338163
chr11	116814750	116814899	Nooverlap	1.47074	0.110694	2.40451	0.00918046	-0.500031	0.497164
chr11	116842100	116844099	Stable	2.81771	0.0111299	3.9674	9.35911e-05	-0.979976	0.326269
chr11	116851600	116853099	Stable	3.42412	0.0111299	3.89176	0.000119599	-0.707188	0.371688
chr11	116853150	116854049	Stable	3.69104	0.0111299	4.07315	6.79868e-05	-0.923652	0.326777
chr11	116940100	116940349	Nooverlap	1.44659	0.0481773	2.43971	0.00832709	0.00855241	0.99068
chr11	117076350	117077499	Nooverlap	2.34135	0.0186928	3.23393	0.000908577	-0.692298	0.374683
chr11	117077700	117077849	Nooverlap	0.629776	0.458991	2.01609	0.0261395	0.234475	0.757452
chr11	117114400	117114999	Stable	3.26819	0.0111299	2.97802	0.00188693	-0.367332	0.590799
chr11	117115150	117115749	Stable	2.00435	0.0143545	2.5323	0.00646596	-0.835598	0.344916
chr11	117121200	117121299	Nooverlap	1.08604	0.0901693	2.37054	0.0100544	-0.438628	0.535411
chr11	117265400	117267599	Stable	2.9718	0.0111299	4.03702	7.59532e-05	-0.9728	0.301346
chr11	117267850	117268149	Nooverlap	1.4187	0.107922	2.79221	0.00316603	-0.537488	0.467152
chr11	117278400	117278599	Nooverlap	2.49362	0.0111299	1.8554	0.0397029	-0.64193	0.416271
chr11	117279150	117280099	Nooverlap	2.01126	0.036364	3.19291	0.00102083	-1.27231	0.295864
chr11	117280400	117280849	Nooverlap	2.12723	0.0237978	2.65193	0.00468115	-1.30538	0.285557
chr11	117281100	117281899	Nooverlap	1.57923	0.0539481	2.36473	0.0102239	-1.08108	0.323148
chr11	117282750	117282849	Nooverlap	0.331551	0.296031	1.77449	0.0487242	-0.606917	0.408857
[truncated: 28,691 more rows]

## Sheet: peak_summary
	shh_peak	shhgli_peak	wt_peak
Stable_Number	5892	6465	4863
HH-Sensitive_Number	28	168	49
None_Number	179	276	32
HH-Dependent_Number	14	132	110
Stable_Proportion	0.253616	0.223733	0.318572
HH-Sensitive_Proportion	0.00120523	0.00581395	0.00320996
None_Proportion	0.00770489	0.0095515	0.0020963
HH-Dependent_Proportion	0.000602617	0.00456811	0.00720603
