# Supplementary material for: GLI transcriptional repression regulates tissue-specific enhancer activity in response to Hedgehog signaling
Source: eLife. 2020 Jan 28;9:e50670. doi: 10.7554/eLife.50670 (PMC6986877; doi:10.7554/eLife.50670)
Supplement: Figure 4—source data 2. — List of 31 HH-responsive GBRs with H3K27me3 enrichment in Shh-/- limb buds and their enrichment of H3K27ac in Shh-/-;Gli3-/-. 20 of the 31 regions were detected in the H3K27ac MicroChIP analyses, those not detected are noted. For the 20 regions detected, they are classified as having H3K27ac in Shh-/-;Gli3-/- as ‘present/increased’ or ‘absent/decreased’ compared to WT controls. [file elife-50670-fig4-data2.xlsx]

## Sheet: H3K27me3 pos GBRs in Shh nulls
chr	start	end	nearby gene	H3K27ac signal in ShhGli3 mutants compared to WT	GBR Type
chr2	33543700	33544699	Lmx1b	Present/increased in ShhGli3 compared to WT	HH-dep
chr2	74667700	74668699	Hoxd13	Present/increased in ShhGli3 compared to WT	HH-dep
chr2	74668400	74669399	Hoxd13	Present/increased in ShhGli3 compared to WT	HH-dep
chr2	74673250	74674249	Hoxd12/13	No signal in WT or ShhGli3	HH-dep
chr2	74679450	74680449	Hoxd11/12	Present/increased in ShhGli3 compared to WT	HH-dep
chr2	109677100	109678099	Bdmf	No signal in WT or ShhGli3	HH-dep
chr4	117095500	117096599	Ptch2	Absent/reduced in ShhGli3 compared to WT	HH-dep
chr4	117494450	117495449	Rnf220	No signal in WT or ShhGli3	HH-dep
chr8	70494250	70495249	Crlf1	No signal in WT or ShhGli3	HH-dep
chr8	120838650	120839649	Gm20388	No signal in WT or ShhGli3	HH-dep
chr10	127339000	127342549	gli1	Absent/reduced in ShhGli3 compared to WT	HH-dep
chr13	63562500	63569599	ptch1	Present/increased in ShhGli3 compared to WT	HH-dep
chr13	63572450	63574449	ptch1	Absent/reduced in ShhGli3 compared to WT	HH-dep
chr15	35295124	35296123	osr2	No signal in WT or ShhGli3	HH-dep
chr15	35295674	35296673	osr2	No signal in WT or ShhGli3	HH-dep
chr15	35296274	35297273	osr2	No signal in WT or ShhGli3	HH-dep
chr1	132189950	132190949	Lemd1	Present/increased in ShhGli3 compared to WT	HH-sens
chr2	74673774	74674773	Hoxd12	No signal in WT or ShhGli3	HH-sens
chr2	74681550	74682549	Hoxd11	Present/increased in ShhGli3 compared to WT	HH-sens
chr2	74682624	74683623	Hoxd11	Present/increased in ShhGli3 compared to WT	HH-sens
chr2	74683174	74684173	Hoxd11	Present/increased in ShhGli3 compared to WT	HH-sens
chr4	114842924	114843923	Gm12830	No signal in WT or ShhGli3	HH-sens
chr4	131920674	131921673	Gm12992/Tmem200b	Present/increased in ShhGli3 compared to WT	HH-sens
chr4	131921100	131922099	Gm12992/Tmem200b	Present/increased in ShhGli3 compared to WT	HH-sens
chr8	57333100	57334949	Gm34030	Present/increased in ShhGli3 compared to WT	HH-sens
chr8	89042300	89044649	Sall1	Present/increased in ShhGli3 compared to WT	HH-sens
chr15	102746450	102747449	Calcoco1/HoxC cluster	Present/increased in ShhGli3 compared to WT	HH-sens
chr17	15829924	15830923	Rgmb	No signal in WT or ShhGli3	HH-sens
chr18	80985974	80986973	Sall3	Present/increased in ShhGli3 compared to WT	HH-sens
chr18	80986450	80987449	Sall3	Present/increased in ShhGli3 compared to WT	HH-sens
chr18	80987074	80988073	Sall3	Present/increased in ShhGli3 compared to WT	HH-sens
	SUMMARY
	31	regions are HH-respondive GBRs with H3K27me3 enrichment in Shh null limb buds
	20/31	regions were detected in H3K27ac MicroChIP
	17/20	detected regions maintained, or had increased H3K27ac enrichment in ShhGli3 double mutant limbs compared to WT controls
	3/20	detected regions had reduced or lost H3K27ac enrichmnet in ShhGli3 double mutant limbs compared to WT controls
