# Supplementary material for: GLI transcriptional repression regulates tissue-specific enhancer activity in response to Hedgehog signaling
Source: eLife. 2020 Jan 28;9:e50670. doi: 10.7554/eLife.50670 (PMC6986877; doi:10.7554/eLife.50670)
Supplement: Figure 5—source data 1. — HDAC1 binding regions with called peaks with a false discovery rate (FDR) < 0.05 from four biological replicates of E11.5 (40–44S) pooled forelimbs and hindlimbs. Rank ordered coordinates, peak length, log2 fold change (log2FC) and FDR are listed for each peak. [file elife-50670-fig5-data1.xlsx]

## Sheet: HDAC1peak-3
chr	start	end
chr15	76520600	76523849
chr4	151604300	151605399
chr15	84829250	84829949
chr11	120232400	120241449
chr6	52215200	52250249
chr5	142812500	142823899
chr17	84182800	84188649
chr11	120184600	120190599
chr14	21982050	21988449
chr17	25239500	25240349
chr7	6409900	6410549
chr4	155859150	155859999
chr7	82865550	82870999
chr2	74678900	74684849
chr15	78119600	78120249
chr8	57319600	57328049
chr11	102603450	102608449
chr13	60173600	60177899
chr19	4988700	4989499
chr12	27336800	27343649
chr2	130208150	130209849
chr10	99260800	99267399
chr2	157912900	157913849
chr8	14072400	14073049
chr2	38417650	38418699
chr17	34117650	34122999
chr19	42255750	42256299
chr18	75366450	75373049
chr10	80147900	80152849
chr7	70356900	70362549
chr4	140701050	140703449
chr11	120228600	120231849
chr2	30471750	30474499
chr11	24076000	24082399
chr1	59481950	59485299
chr9	114560250	114564699
chr5	142367200	142368049
chr15	72568500	72568949
chr4	154633200	154638899
chr14	122473950	122480549
chr6	84583000	84589749
chr14	67714650	67716749
chr3	37639600	37641199
chr8	25518550	25521049
chr5	75151350	75155799
chr13	63562850	63567149
chr1	86526650	86530099
chr18	5591200	5593499
chr11	20248800	20249799
chr9	108825850	108827999
chr3	86544550	86548699
chr4	11190400	11192449
chr8	83898900	83901599
chr10	43477850	43480399
chr17	62879750	62883649
chr17	56303250	56304599
chr7	73556400	73558649
chr7	137308850	137314599
chr4	106909750	106913299
chr2	33635250	33645399
chr11	108920100	108922949
chr1	36511500	36513349
chr5	149050800	149053099
chr7	110121500	110123549
chr13	28948550	28953799
chr4	156235800	156237599
chr4	132143500	132144899
chr4	152799150	152799849
chr5	77309250	77310649
chr9	115308700	115310499
chr7	25248900	25251449
chr10	126978400	126980399
chr13	55824500	55832149
chr13	100650600	100651949
chr11	116851300	116853899
chr4	136172200	136173199
chr12	80109500	80114749
chr8	84659750	84662999
chr9	106368250	106370949
chr12	16653250	16654049
chr16	4558500	4560499
chr12	8770800	8773249
chr8	26977050	26981199
chr3	99252550	99258649
chr12	76368750	76371699
chr10	120473700	120477699
chr1	138839750	138842599
chr11	98981800	98982899
chr9	64018800	64023249
chr5	77265350	77266999
chr10	5804000	5806149
chr6	49212600	49216149
chr8	71380200	71382549
chr2	156839700	156841449
chr4	153481600	153483649
chr11	69919850	69921499
chr16	30063300	30064649
chr18	35887600	35890349
chr6	148944050	148946749
chr4	133751500	133754949
chr16	94526250	94527049
chr12	31264700	31266849
chr12	111677850	111678699
chr17	46030300	46032599
chr14	20707250	20708599
chr12	17544500	17545799
chr18	35829250	35832799
chr14	25457300	25461699
chr8	126591100	126594499
chr9	15493300	15494099
chr16	30064800	30069599
chr8	70233750	70234999
chr9	87728350	87731399
chr14	59625050	59626549
chr8	87957850	87961399
chr2	152396350	152399199
chr5	123343850	123346399
chr12	24706950	24709199
chr19	55741400	55745549
chr1	163307300	163315299
chr12	3806200	3808299
chr15	75745750	75748649
chr12	55599000	55601049
chr4	43381550	43382399
chr12	29937850	29939199
chr5	123137450	123144099
chr6	47593700	47595399
chr13	58126500	58129449
chr7	24884550	24885699
chr13	69533300	69535249
chr4	136143550	136146249
chr18	34953550	34955049
chr4	129376950	129378149
chr1	178335400	178338149
chr11	120347150	120349549
chr14	28504200	28512199
chr12	111712500	111713649
chr5	35278600	35281249
chr15	73839150	73840199
chr14	105892750	105898149
chr7	127024750	127026849
chr2	92182600	92184599
chr9	82974100	82976199
chr1	167283750	167285549
chr2	180041600	180043649
chr4	103619100	103620599
chr2	28839700	28841049
chr4	151107350	151109249
chr8	120486350	120489899
chr13	58214800	58215899
chr15	11995050	11996099
chr9	44880300	44882299
chr18	16806750	16809949
chr4	140258800	140259449
chr8	70698600	70700299
chr11	106998300	106999849
chr1	91800300	91803349
chr15	79042000	79043549
chr2	181669950	181672299
chr11	73176550	73177899
chr8	123948900	123949549
chr5	135186700	135188499
chr8	8659400	8661599
chr16	96081450	96083049
chr4	129740500	129742899
chr15	8443450	8445549
chr5	124352000	124354899
chr10	37135600	37139099
chr11	119022550	119024399
chr19	41980550	41982399
chr6	99520650	99523649
chr8	44937100	44938749
chr5	119834800	119840949
chr17	33929050	33930549
chr19	26604450	26607949
chr2	122630500	122631699
chr9	40800900	40803499
chr2	74685800	74694849
chr2	74696500	74700749
chr2	18045050	18049149
chr2	30065950	30068249
chr3	148987200	148990799
chr18	80295450	80296699
chr12	12938800	12942899
chr8	105170400	105171949
chr2	51146650	51149249
chr2	91182350	91183549
chr1	84838000	84840799
chr14	55822800	55826249
chr11	74829850	74832499
chr13	31806400	31812549
chr14	30714950	30716549
chr18	9212850	9214949
chr9	72806600	72808149
chr12	86881750	86885299
chr2	32961350	32962849
chr10	80385950	80388199
chr15	38518350	38519599
chr8	89039350	89045749
chr12	71015850	71017199
chr10	127041150	127042449
chr7	44868250	44869749
chr5	88564800	88566099
chr2	153345600	153347199
chr1	86358000	86359349
chr7	67758550	67759849
chr17	56241950	56242499
chr5	110386000	110387399
chr13	69611650	69612749
chr3	138526750	138528599
chr1	133422850	133424449
chr5	150593550	150594949
chr1	178527350	178531149
chr7	16810550	16812299
chr11	120823050	120824949
chr18	84086850	84090149
chr10	7662950	7663649
chr2	153032150	153032649
chr1	89454150	89455949
chr3	95228100	95229549
chr13	111807700	111808999
chr4	21712150	21712599
chr9	78480150	78482049
chr6	90462400	90463999
chr5	74194600	74196299
chr3	51275950	51277699
chr10	88826450	88826899
chr18	84084150	84086699
chr7	44985700	44986399
chr7	114415250	114416699
chr5	67607250	67608349
chr9	61372150	61374799
chr11	80476500	80477599
chr17	35000600	35001999
chr3	90388700	90390349
chr6	99692000	99693999
chr15	77840600	77842249
chr5	121545200	121546249
chr18	10609500	10610649
chr18	46524300	46525899
chr16	22160700	22163699
chr11	116434150	116434949
chr9	107707450	107710149
chr13	100103550	100104199
chr12	73111400	73113599
chr1	92473450	92473949
chr5	121397750	121398749
chr3	87929850	87930749
chr19	46500000	46503149
chr8	126474100	126475399
chr5	24841700	24842549
chr17	88440200	88442199
chr10	13964750	13967599
chr19	53310300	53314399
chr8	83996100	83998099
chr19	34877900	34879349
chr8	117256300	117258349
chr19	7267600	7269199
chr3	36571300	36572249
chr15	79741950	79742949
chr2	74684950	74685549
chr9	67632400	67634399
chr11	102316650	102320199
chr14	8097950	8098949
chr11	106787100	106789549
chr6	101377000	101378049
chr11	5097900	5099999
chr7	67950750	67953949
chr2	152735900	152738349
chr9	32539950	32543499
chr18	25668050	25668499
chr6	86523650	86527199
chr12	73043600	73047049
chr5	33996250	33996849
chr16	38089300	38090249
chr4	151994550	151996899
chr4	140439800	140440249
chr3	55781500	55787999
chr15	85580350	85582049
chr12	45073450	45074899
chr19	29805150	29806699
chr2	33700500	33701949
chr3	30227600	30228649
chr13	15463000	15466049
chr15	34837200	34838499
chr1	55087100	55088749
chr8	47287550	47289849
chr3	51339550	51341949
chr18	44380300	44381149
chr7	142657150	142661999
chr9	14380650	14381249
chr3	129830300	129831849
chr4	152039200	152040099
chr3	145576100	145576599
chr6	84197500	84198299
chr4	155891000	155892799
chr15	36792150	36794449
chr12	69196650	69198199
chr17	64600800	64602549
chr5	74531100	74531949
chr4	155220850	155222849
chr18	13969800	13973249
chr11	88047100	88049349
chr9	63756500	63758749
chr13	56581700	56582649
chr9	59485500	59487099
chr19	21271950	21273699
chr5	143909150	143909849
chr11	116023100	116024549
chr11	93967500	93968499
chr2	104492950	104494699
chr16	10784100	10786199
chr11	63918700	63922399
chr18	82910400	82912499
chr17	26507750	26508599
chr16	97850650	97851999
chr8	84655400	84656999
chr15	9071250	9072399
chr11	44518450	44520199
chr10	82698900	82699849
chr8	11555500	11558099
chr10	81176350	81178049
chr6	87730100	87732049
chr10	80432650	80434099
chr3	102203150	102204849
chr11	86756350	86758199
chr15	86032100	86034799
chr8	70607750	70610649
chr10	23349150	23350649
chr11	97699800	97700999
chr3	30506650	30510749
chr2	28916000	28916599
chr8	15027050	15028949
chr13	55329450	55330599
chr2	4881150	4883049
chr11	85886600	85891849
chr15	60822850	60824049
chr16	17069650	17070449
chr9	41890200	41890849
chr15	87544350	87545099
chr1	166001400	166003999
chr2	31141100	31142549
chr4	58205550	58206899
chr3	66976700	66982149
chr2	174329600	174331699
chr5	142960100	142963399
chr5	145139100	145140699
chr19	8819650	8821299
chr10	125965850	125969999
chr10	123196200	123197449
chr19	36918200	36919399
chr7	133120550	133124699
chr2	117120300	117122649
chr7	142547450	142549249
chr4	98923000	98924849
chr11	8623650	8625249
chr11	33162000	33163049
chr19	4625200	4625849
chr8	121300150	121302149
chr3	69004750	69006599
chr11	117265750	117267099
chr2	180024250	180025949
chr5	137349350	137351799
chr7	127776700	127778149
chr2	130906300	130906899
chr1	172026350	172027499
chr5	124862000	124863749
chr4	11965800	11966799
chr11	94327750	94328549
chr12	110591150	110591949
chr11	60139450	60140999
chr5	134313250	134315199
chr7	140882000	140882799
chr8	79027900	79031249
chr2	19450950	19453599
chr12	80756900	80759399
chr11	88067650	88069649
chr2	126674350	126676299
chr4	54946800	54949449
chr3	88531000	88533749
chr19	41895800	41896399
chr2	26236950	26237499
chr3	95929250	95930499
chr19	55098750	55099699
chr12	80518300	80520149
chr8	64849200	64850349
chr1	139422100	139422899
chr11	115813600	115815299
chr19	46056550	46057399
chr3	22075450	22077699
chr3	60500750	60501849
chr10	26373400	26376149
chr5	65536650	65537249
chr13	54970900	54971349
chr9	107982450	107986199
chr13	60267550	60268349
chr2	170129950	170131699
chr17	80206100	80207649
chr19	36347950	36349599
chr10	128890050	128891999
chr8	79638750	79640399
chr17	28328050	28329949
chr6	72216550	72217299
chr15	34442750	34443849
chr5	146230850	146231949
chr13	58400550	58403299
chr10	17722800	17725449
chr5	131536650	131539149
chr8	71506950	71508799
chr5	123523550	123524699
chr13	97240950	97242149
chr11	17159150	17160049
chr8	57486750	57488149
chr7	80026950	80027949
chr15	98870800	98872449
chr17	70847650	70853749
chr5	115429400	115431249
chr8	111536100	111537899
chr4	151933500	151934299
chr4	54945000	54946499
chr12	108554700	108555799
chr19	43440150	43441949
chr9	59655950	59657799
chr13	45389600	45390799
chr17	50508800	50510099
chr4	152008400	152010149
chr4	154855500	154856499
chr10	79926600	79928699
chr10	81429950	81431499
chr17	80479550	80480699
chr4	151289000	151289449
chr11	6474850	6476399
chr2	152411900	152415099
chr9	61913850	61914499
chr6	120363800	120364949
chr12	112673450	112674599
chr12	108792150	108794749
chr17	35978750	35980799
chr9	62340700	62345149
chr19	28679450	28680499
chr1	192834550	192835499
chr11	58008600	58010599
chr6	87980350	87982099
chr8	95351400	95353699
chr9	23222600	23223949
chr3	57847150	57848299
chr2	38350600	38357299
chr7	144942850	144943649
chr2	27425200	27427199
chr7	35584250	35586049
chr6	28260400	28262699
chr3	53463100	53464799
chr3	5218150	5220149
chr12	33956550	33960349
chr7	98957000	98957799
chr3	51415750	51416899
chr12	82169400	82170399
chr1	78657750	78658899
chr18	58209050	58210999
chr5	92137750	92138349
chr12	54984950	54986699
chr11	74649200	74650299
chr4	59805700	59806549
chr10	86704550	86705549
chr4	46450800	46452349
chr17	53566750	53568499
chr9	47529900	47531949
chr17	34981750	34982499
chr2	27474550	27476249
chr17	47923650	47924999
chr1	59912550	59913899
chr9	43238700	43240199
chr7	142967000	142969549
chr5	32135050	32137249
chr8	27226850	27228099
chr5	149320500	149321299
chr17	25593500	25594449
chr15	84853150	84856599
chr17	87445600	87447449
chr19	14596700	14598149
chr5	25498950	25500149
chr15	81857050	81858649
chr8	105635950	105637549
chr2	174285250	174287099
chr1	93342450	93343649
chr16	4418850	4420649
chr11	102880650	102881199
chr5	128599300	128602399
chr5	143253050	143254949
chr9	121759350	121761099
chr4	132211200	132212349
chr8	124792100	124793599
chr17	29489850	29492599
chr5	118559700	118561999
chr11	95991050	95992099
chr18	56707300	56709349
chr16	18248000	18250049
chr7	99625150	99627049
chr15	26308600	26309899
chr2	92184650	92185549
chr2	32317050	32318699
chr17	23726300	23726849
chr8	108703400	108705199
chr2	127831450	127831999
chr2	74704250	74707299
chr17	73107950	73108399
chr9	44334650	44336299
chr9	106464700	106465999
chr4	135271750	135272899
chr17	27555100	27557649
chr16	92058300	92059349
chr4	88031100	88033849
chr16	17233600	17234299
chr9	110131750	110132949
chr1	37429850	37430649
chr19	10182650	10183499
chr7	112679350	112680299
chr7	126502000	126503799
chr12	15815300	15817199
chr15	76476750	76478149
chr9	120127750	120128549
chr2	18056000	18058499
chr19	4614600	4615899
chr8	34804950	34809899
chr11	96003750	96008249
chr11	98794800	98797149
chr17	45572350	45574299
chr9	72110500	72112299
chr11	120457800	120458399
chr13	47014350	47014899
chr9	67759700	67760899
chr11	87986850	87987749
chr10	79854450	79855849
chr17	88063700	88066449
chr15	102202950	102204449
chr15	85669950	85672199
chr5	115559500	115559899
chr3	88620900	88622499
chr19	3685150	3687349
chr6	83053850	83055299
chr3	58414700	58417649
chr1	134559850	134561649
chr2	59611550	59613499
chr17	12991600	12992999
chr2	172042100	172043449
chr5	138170550	138171749
chr13	47104850	47106599
chr6	117906650	117908399
chr12	5373550	5375849
chr14	122462200	122465349
chr6	72898550	72900499
chr5	30113550	30115249
chr8	107293000	107294599
chr6	127148650	127151199
chr13	93498050	93499849
chr13	100124650	100125149
chr6	87850200	87850999
chr3	90265000	90265899
chr5	4755450	4758099
chr7	84150800	84152299
chr13	29983950	29986199
chr4	116075150	116076199
chr10	111164700	111166049
chr7	13024100	13025899
chr9	88480900	88483249
chr5	136565750	136568349
chr4	9668550	9669099
chr14	63681500	63681949
chr11	85836350	85838749
chr17	27622350	27624099
chr6	90987700	90988449
chr7	65155500	65157249
chr10	59879450	59880099
chr2	30545150	30545849
chr19	7416700	7418649
chr18	38211100	38211849
chr17	4995200	4997499
chr4	129188850	129190299
chr15	43169550	43170849
chr3	98013350	98014299
chr1	189687600	189688299
chr2	144270050	144271299
chr10	108332500	108333299
chr17	80061050	80062549
chr11	51999750	52000899
chr17	13760850	13761749
chr5	3341100	3344699
chr2	172370250	172371649
chr18	45558250	45561299
chr1	192854250	192856199
chr7	111081650	111082949
chr17	12318150	12318949
chr11	43682050	43682849
chr11	6444000	6444599
chr4	76449250	76450199
chr5	129500750	129501799
chr11	69409250	69412949
chr11	115603450	115604599
chr2	128686850	128687749
chr11	100440700	100441149
chr7	46033650	46034249
chr16	17832900	17834749
chr3	30009950	30013399
chr6	39205250	39207299
chr5	37820850	37824999
chr17	65884300	65885199
chr2	181520200	181521249
chr2	72978700	72979749
chr2	130273950	130275399
chr3	136669450	136671899
chr19	24173700	24174649
chr7	127875450	127876899
chr5	144254900	144256249
chr3	84814000	84815999
chr5	76974350	76975199
chr6	94699450	94700499
chr6	108828250	108829599
chr6	125096000	125097799
chr1	178318100	178318899
chr18	75819350	75821049
chr7	74012400	74013999
chr2	116060850	116064349
chr6	54816550	54817599
chr11	61929750	61930399
chr13	91460350	91462449
chr8	11007250	11009999
chr8	47713100	47714599
chr3	31093600	31095949
chr11	118584750	118585249
chr7	19075550	19076899
chr17	50189600	50191049
chr2	102449500	102452099
chr13	54947900	54949949
chr9	101073300	101076149
chr14	45657150	45658549
chr11	69995600	69997599
chr6	119478900	119481499
chr5	93267100	93268799
chr18	80984900	80987549
chr15	78934750	78935349
chr13	17803300	17805299
chr10	71284500	71285549
chr10	120977900	120979799
chr11	98682400	98683349
chr5	147221000	147224299
chr7	82335050	82336549
chr2	93187300	93188349
chr13	98316150	98317349
chr7	19093850	19094399
chr13	69738900	69740099
chr18	6135250	6135899
chr5	115237950	115238549
chrX	12078250	12081299
chr11	93955150	93955999
chr19	11912200	11912999
chr9	20952000	20952999
chr13	64152350	64153749
chr10	18318400	18319599
chr7	63937350	63939649
chr3	95658150	95660049
chr1	97660750	97662299
chr7	118855350	118856149
chr11	31870700	31871149
chr7	34653000	34655799
chr1	30872950	30874099
chr12	25097700	25099099
chr13	34875500	34875999
chr13	24831550	24832199
chr14	68083550	68084899
chr14	101608050	101609199
chr10	121586300	121587149
chr4	148590950	148592349
chr8	25840400	25841249
chr4	58670200	58671449
chr8	122376450	122377199
chr5	125389150	125390249
chr4	134020650	134020999
chr15	77970350	77971399
chr6	145862850	145863849
chr11	70653200	70656849
chr2	127481550	127483149
chr3	51559500	51561449
chr18	39489050	39491449
chr13	103919200	103921749
chr12	99392100	99393399
chr2	125782400	125782899
chr1	127773800	127774849
chr9	57764400	57766249
chr2	32395600	32396799
chr3	84039050	84040549
chr13	40727700	40732499
chr9	50659000	50659949
chr18	67640500	67642149
chr3	96246150	96247749
chr19	44293450	44294399
chr13	113617050	113618749
chr4	40970750	40971499
chr3	105958850	105960149
chr16	91269600	91271949
chr7	27408200	27409049
chr11	68384650	68387249
chr5	34186700	34188199
chr13	42051800	42053049
chr11	104441100	104443099
chr7	16309600	16310699
chr15	52039900	52040899
chr2	121413150	121414999
chr2	75659400	75660249
chr19	60755750	60757399
chr17	46253750	46254549
chr8	92459950	92461049
chr10	82984850	82986449
chr2	72979900	72981099
chr5	119802500	119806249
chr14	55490700	55491799
chr1	189727700	189729099
chr15	82147050	82148449
chr17	72836650	72837649
chr11	60104850	60107249
chr11	69415600	69416399
chr11	6415850	6417099
chr10	42761600	42762299
chr3	9249900	9251999
chr16	50429800	50430849
chr10	82763350	82763899
chr2	129800400	129801999
chr11	94548900	94549399
chr9	103364050	103365849
chr1	155097850	155099649
chr2	164745900	164746449
chr11	43528350	43529599
chr3	41564700	41566349
chr15	80173550	80174349
chr7	134224550	134225649
chr8	27085300	27086199
chr4	139380300	139380899
chr5	114567100	114568199
chr6	85511300	85512749
chr5	125177550	125179449
chr6	84191550	84192249
chr16	20240850	20241549
chr15	82211550	82213049
chr6	145249550	145250549
chr6	121473050	121473699
chr12	83950500	83951549
chr11	103649350	103650399
chr11	3289600	3293199
chr15	87624100	87625849
chr2	74656900	74659849
chr14	65358300	65359299
chr18	15149800	15151499
chr2	172938850	172940949
chr18	69344950	69348049
chr9	109875250	109876849
chr1	51914950	51916149
chr4	33188750	33189799
chr6	91410150	91411849
chr3	144204100	144205999
chr5	125475700	125476349
chr4	84673750	84676049
chr15	38077650	38079199
chr15	58075700	58076999
chr11	109650850	109652149
chr5	3595750	3596649
chr7	24299000	24299549
chr1	92831200	92832949
chr11	63131300	63133349
chr10	19933400	19935049
chr19	5366150	5367599
chr19	5071450	5072199
chr4	97777050	97779449
chr11	120624400	120625199
chr10	42275150	42277749
chr4	32983000	32984199
chr11	58938150	58939049
chr4	32238500	32240299
chr3	52104450	52105299
chr10	77259000	77259949
chr15	25622500	25623849
chr1	24099550	24100149
chr1	167000500	167002749
chr5	110543600	110545149
chr17	36271050	36271849
chr5	137531350	137533549
chr1	57995900	57996399
chr14	11553200	11554949
chr5	76950250	76952149
chr4	98817250	98817849
chr14	27038950	27039999
chr19	53329300	53330349
chr11	112783450	112785899
chr3	45379250	45382049
chr11	121259350	121260799
chr14	28470050	28470749
chr16	91010650	91011849
chr1	62703050	62707899
chr1	180330250	180331299
chr11	88716950	88719199
chr5	23674750	23676449
chr15	81744900	81746349
chr5	111418150	111418749
chr5	115340950	115341599
chr9	62810850	62811899
chr11	72607050	72608849
chr7	45051150	45054249
chr17	26973100	26973749
chr11	19013000	19020299
chr19	8735650	8736349
chr11	94990650	94993199
chr7	80370500	80371749
chr5	122500850	122502799
chr16	78575850	78577199
chr11	117930600	117931199
chr9	32695900	32696449
chr9	110116450	110118249
chr16	10835050	10835499
chr17	31511750	31512449
chr8	120228300	120230149
chr12	109068050	109068649
chr17	10318200	10319049
chr9	51962900	51963649
chr10	94943550	94945449
chr9	66591800	66593199
chr3	103808950	103809899
chr4	133038250	133039999
chr5	143328700	143329449
chr13	107888500	107891899
chr5	25100300	25101249
chr2	168205650	168207749
chr3	130060250	130061049
chr2	31653800	31655449
chr8	111056200	111057299
chr10	67126600	67127699
chr2	31974150	31975049
chr9	66945800	66946749
chr15	91572350	91573199
chr8	22807800	22808299
chr4	124936400	124937249
chr3	116423000	116424149
chr4	144891850	144894249
chr2	131040600	131041949
chr19	6117600	6118699
chr18	78267450	78268299
chr2	133551800	133553799
chr10	81192350	81193199
chr3	65527650	65529549
chr12	69371600	69373649
chr16	15084750	15085799
chr1	71102400	71103049
chr9	65140800	65142249
chr17	34898100	34900099
chr12	55820400	55821199
chr3	55496350	55496899
chr5	33433200	33434899
chr10	80602750	80603349
chr8	107048100	107048999
chr19	37697000	37699599
chr15	5143800	5144399
chr6	55037650	55038599
chr16	95585250	95585899
chr17	56673250	56674049
chr7	101836550	101838649
chr1	151500250	151500799
chr11	77488650	77490149
chr6	149100750	149101999
chr16	95990650	95991199
chr14	20388500	20389099
chr1	4857650	4858399
chr9	52047700	52049049
chr2	69722750	69723449
chr16	90934400	90935449
chr6	83137150	83138449
chr6	51171300	51172899
chr9	44478400	44479999
chr8	33653250	33654399
chr11	79992550	79994249
chr2	25372050	25372949
chr14	115040350	115043199
chr5	28464150	28466799
chr11	61022000	61023249
chr2	70661350	70662199
chr5	130222200	130222849
chr7	28597400	28598199
chr2	167537700	167539849
chr1	38835500	38837049
chr15	101052650	101054249
chr13	73846600	73847649
chr1	33719850	33720549
chr4	153974700	153975549
chr2	76405950	76407549
chr17	46855950	46858249
chr17	56583800	56585649
chr7	144937700	144940399
chr7	126081350	126082799
chr17	35241400	35243649
chr11	97150250	97152149
chr6	117916650	117917749
chr8	106168550	106169199
chr10	95514650	95516099
chr15	88861750	88864099
chr3	131110250	131112799
chr5	73255150	73256649
chr3	100685200	100686399
chr5	100415650	100416699
chr7	66108650	66110749
chr7	16399950	16401799
chr8	115706300	115708299
chr2	74668150	74669749
chr13	23561850	23562399
chr11	120580900	120582099
chr13	52980100	52981849
chr8	109868550	109869199
chr5	110653050	110653949
chr5	143112500	143113249
chr5	20701700	20702999
chr17	14278700	14281049
chr7	19271000	19272749
chr11	86357200	86358149
chr17	15824900	15826649
chr7	34812200	34813349
chr2	18026550	18028349
chr3	95217250	95218249
chr12	42972800	42973199
chr2	28641000	28641799
chr15	88733000	88734599
chr14	62331950	62332599
chr5	28457850	28458899
chr2	58566950	58567599
chr6	128362250	128363349
chr8	90908400	90909049
chr6	65671500	65672249
chr15	58134000	58135449
chr11	70562500	70563849
chr6	86438150	86439149
chr11	69580300	69581849
chr14	26969900	26970699
chr10	82859100	82859449
chr15	102073550	102074749
chr18	80707400	80708699
chr2	29935250	29935749
chr10	60830400	60831699
chr6	125163950	125166049
chr11	97114650	97115549
chr16	90220500	90221299
chr10	127288250	127289449
chr15	93336050	93337349
chr17	63498900	63500899
chr8	126584050	126585349
chr9	87021600	87022299
chr5	129020200	129021699
chr11	97187250	97188749
chr3	21935500	21936349
chr14	47276050	47277349
chr5	74093050	74093799
chr1	39900550	39903049
chr18	20745550	20746399
chr8	77517000	77519299
chr4	133813050	133814799
chr8	36248150	36249499
chr12	108001850	108004699
chr2	129198100	129199399
chr11	114791200	114792349
chr5	75156200	75157049
chr5	142905350	142906099
chr17	26715450	26716549
chr1	182019000	182020899
chr17	27056800	27057899
chr11	120784050	120784799
chr4	126147400	126150599
chrX	77509750	77510899
chr3	122618500	122620549
chr10	67096200	67097499
chr2	54435950	54436899
chr18	36560450	36561099
chr15	28024100	28026099
chr2	154791100	154792249
chr15	102244450	102249799
chr9	31210950	31211899
chr13	49146950	49148099
chr10	121475150	121476299
chr8	13338850	13339599
chr2	3118150	3118999
chr19	36833950	36835049
chr18	57878050	57879649
chr13	73833750	73834199
chr2	83724050	83725449
chr15	38299200	38301499
chr3	27709850	27711299
chr17	79020100	79021249
chr6	120665200	120667599
chr5	131306100	131307999
chr15	36607800	36609949
chr8	57511800	57513499
chr6	21851700	21852649
chr1	191396150	191397149
chr12	91588150	91590549
chr15	76517900	76520349
chr4	126655400	126655799
chr7	127967400	127968749
chr17	35163900	35165149
chr12	100199000	100200799
chr15	76461400	76462449
chr8	13104650	13105299
chr2	152738650	152739849
chr18	34330750	34331549
chr9	107871900	107873149
chr12	69168200	69169349
chr2	75703400	75705049
chr4	141790300	141791049
chr14	118938000	118938699
chr7	44246350	44247349
chr8	95806350	95807349
chr4	123282600	123283699
chr14	55643050	55644099
chr2	24949500	24950449
chr17	87975000	87975799
chr3	101923850	101924749
chr18	47366400	47369349
chr5	88553850	88554849
chr8	22593850	22594249
chr6	53817850	53821199
chr7	130263700	130266599
chr11	74896400	74898449
chr8	94912750	94913749
chr11	55469550	55470399
chr2	83644250	83645199
chr3	152210100	152211649
chr4	136140200	136141199
chr5	110770050	110770949
chr11	108343000	108344149
chr14	121378250	121379799
chr3	30513700	30515599
chr15	98532700	98534349
chr5	33820700	33821749
chr19	47013900	47015949
chr15	59647450	59650099
chr5	75150250	75150949
chr13	46726800	46727949
chr11	78490750	78491349
chr4	108459100	108460799
chr11	69546250	69547349
chr5	142401000	142402149
chr9	106885050	106887299
chr9	72924850	72926249
chr9	7836750	7837749
chr15	6707650	6709099
chr14	47649100	47649949
chr8	46293150	46296549
chr17	74294250	74295949
chr4	150236150	150238049
chr15	98893750	98895299
chr2	25262500	25263099
chr7	45830250	45830999
chr11	118289500	118290349
chr4	80910800	80912249
chr6	52251350	52254799
chr11	69632500	69633849
chr8	70492750	70494299
chr11	70409500	70410349
chr8	35587600	35588849
chr13	117024050	117025999
chr9	57072100	57073549
chr19	55315550	55316699
chr2	20968350	20969649
chr10	58446750	58447599
chr2	32083150	32084849
chr10	111472950	111473999
chr8	46210550	46211299
chr10	80675850	80676349
chr18	80712350	80714099
chr5	53589150	53590899
chr2	103566300	103567499
chr12	111758500	111759499
chr10	62449400	62450299
chr2	153443550	153445699
chr8	84856850	84857349
chr2	33716300	33718349
chr4	155624400	155625499
chr10	85386750	85388649
chr7	36695450	36699099
chr4	107434350	107435949
chr4	156196800	156197999
chr11	84879600	84880699
chr1	88701550	88702399
chr14	69732100	69732999
chr3	96696250	96697699
chr16	50528750	50529599
chr11	116532500	116533649
chr9	119401900	119403749
chr10	62601700	62602599
chr1	89580050	89581949
chr10	59950800	59952499
chr17	28141700	28143049
chr12	116280750	116282049
chr13	51100450	51101599
chr9	121718700	121720399
chr14	34673650	34674849
chr11	77981750	77984749
chr14	70554350	70555149
chr12	111574400	111575599
chr13	63572400	63573999
chr1	86441800	86443199
chr9	43105350	43106649
chr3	121577000	121577499
chr4	105157150	105158649
chr6	99028350	99029049
chr19	17836650	17838049
chr5	81019600	81020699
chr17	47593450	47595499
chr14	100284200	100286649
chr10	45485600	45487199
chr4	135855900	135857449
chr17	25184100	25185149
chr10	61695400	61696549
chr10	69351750	69353049
chr1	93753950	93755599
chr8	57651700	57652999
chr19	8941850	8942899
chr6	28450600	28452449
chr19	12501450	12501899
chr5	9100650	9101199
chr12	111376700	111378499
chr12	104471050	104473399
chr10	91170100	91171949
chr15	64920800	64922499
chr5	140418200	140420249
chr11	74723300	74724599
chr2	30237500	30238549
chr8	108714300	108715499
chr2	106692950	106695549
chr5	127323950	127324499
chr19	57610100	57611599
chr8	128358900	128360199
chr14	65097600	65098399
chr10	93160600	93162349
chr5	22343800	22345399
chr7	116237250	116237949
chr18	73572650	73574499
chr2	118549100	118549799
chr8	123858600	123860199
chr8	121082000	121084999
chr11	106216100	106217349
chr18	67133300	67134249
chr15	81693700	81695049
chr19	10100600	10101849
chr2	79635050	79635999
chr19	9898950	9899599
chrX	68678400	68679549
chr6	72234050	72235699
chr17	35865600	35866849
chr3	138442600	138443549
chr4	95050450	95052549
chr3	95994900	95996399
chr8	88361300	88362299
chr19	37206700	37207899
chr18	38418750	38419999
chr1	43933500	43934449
chrX	13281000	13283099
chr4	103621000	103621499
chr18	52465500	52466099
chr17	86167700	86168999
chr19	10869450	10869949
chr8	120275900	120277499
chr1	36556050	36558699
chr15	99972600	99973849
chr2	128967000	128968449
chr4	133967000	133969049
chr5	73491400	73492349
chr16	8830000	8831099
chr8	102783400	102785349
chr18	34623900	34625349
chr1	162216750	162219449
chr15	79687100	79688199
chr5	136881600	136883149
chr17	24960200	24960699
chr9	44326600	44327199
chr12	108004800	108006249
chr2	50066300	50067049
chr7	122066850	122068099
chr7	98655650	98656899
chr14	25606850	25608649
chr2	59160450	59162149
chr11	119913500	119914299
chr14	25768500	25769449
chr10	54074650	54075899
chr10	40883450	40884649
chr11	60537200	60539849
chr2	166153950	166155749
chr4	149166250	149167699
chr7	19094600	19095999
chr18	61555050	61557149
chr11	107793750	107794649
chr8	124896900	124898499
chr19	46075750	46076499
chr18	58836200	58837599
chr11	117986600	117987299
chr6	113306750	113307899
chr3	59005250	59007349
chr2	31759700	31760899
chr19	38480800	38481499
chr14	102981550	102983149
chr5	138754250	138755799
chr15	83122350	83122899
chr2	167688600	167690349
chr15	103014150	103015499
chr6	71439550	71440449
chr12	99884250	99884949
chr7	110613950	110615499
chr1	168430050	168432199
chr4	129672200	129672749
chr2	167595650	167596499
chr7	25753700	25754799
chr7	35214600	35215799
chr10	7955250	7956949
chr2	128125400	128128499
chr12	9029750	9030599
chr13	51651400	51651949
chr9	70502950	70503949
chr11	69340350	69341149
chr14	16365250	16366449
chr17	34894000	34895399
chr17	47139600	47141599
chr19	5456650	5457599
chr19	5799550	5803049
chr19	32756350	32758499
chr4	141536300	141538949
chr4	123411400	123412549
chr13	95324600	95325849
chr2	24918950	24919749
chr18	46597000	46597499
chr12	46818300	46819699
chr12	71136250	71137499
chr9	29318600	29319199
chr11	32454750	32456049
chr1	152089600	152090599
chr5	65763200	65764999
chr12	112828550	112829649
chr14	122106900	122107999
chr6	92091100	92092299
chr11	6546550	6547499
chr2	27442400	27442799
chr17	43016500	43017249
chr1	191062800	191063549
chr7	27591300	27592349
chr2	157077650	157079549
chr7	83882900	83884399
chr7	38018700	38019599
chr4	44072050	44072849
chr17	15009900	15010449
chr6	72438600	72439649
chr5	138992500	138996349
chr2	180119250	180120049
chr4	33924400	33924849
chr17	46554900	46556449
chr11	62551350	62553199
chr15	73183500	73185699
chr4	8535550	8536049
chr13	54749400	54751299
chr16	9993400	9994099
chr7	98360000	98361599
chr18	54990450	54991699
chr13	51314250	51315199
chr13	100832950	100833449
chr8	120667300	120668749
chr14	99099350	99099849
chr10	63429500	63430349
chr9	104062650	104063999
chr10	79637200	79638199
chr12	80259150	80259999
chr19	27216600	27218499
chr12	73907700	73909099
chr19	21653250	21653949
chr2	158768100	158768699
chr16	11253150	11254649
chr1	43445100	43447199
chr1	25829750	25830649
chr8	121950250	121951249
chr3	108209900	108211049
chr12	32378800	32380049
chr14	62760150	62761249
chr11	69367800	69369349
chr4	142084000	142084749
chr14	30549050	30550049
chr7	48880550	48881749
chr8	48553600	48555999
chr6	65042450	65043099
chr18	77564900	77565999
chrX	94123050	94123599
chr18	31910700	31911349
chr3	54734650	54736099
chr14	54575150	54578299
chr1	13372700	13374699
chr10	42277950	42278699
chr11	69399200	69399999
chr13	35740700	35742299
chr11	59289100	59290249
chr12	53252300	53253749
chr12	23188650	23189999
chr15	75908700	75910899
chr18	34931250	34932799
chr3	90079400	90080599
chr8	8689050	8690499
chr4	132842500	132843399
chr11	35980050	35980649
chr9	21759550	21760649
chr10	80826700	80827649
chr3	142881300	142881999
chr19	6427700	6429149
chr2	78869000	78870599
chr15	98762600	98763449
chr4	130573550	130574399
chr8	120535650	120538299
chr12	80434950	80436999
chr1	90119250	90119649
chr4	129513550	129514849
chr19	58943200	58943999
chr2	132846550	132846849
chr9	21592650	21593799
chr7	37769250	37770999
chr6	83325900	83326349
chr17	4994000	4995149
chr11	5520600	5521599
chr1	151344300	151345749
chr16	33380200	33381049
chr9	56937300	56938199
chr5	43232750	43235749
chr1	74391450	74392549
chr11	51605600	51607049
chr5	24908450	24908849
chr2	5713800	5714999
chr1	136344950	136346399
chr9	72661750	72663749
chr19	16132750	16134149
chr11	19924000	19926049
chr11	113750200	113751849
chr14	99045400	99046549
chr17	32036150	32037149
chr15	81810700	81811849
chr7	131362550	131363149
chr5	119669900	119675349
chr4	141301250	141301999
chr8	106210500	106211649
chr16	4658550	4659399
chr16	72662900	72664049
chr19	8871350	8872149
chr6	125131600	125132549
chr3	107517100	107518099
chr6	94282450	94284299
chr2	77279950	77281249
chr5	25497750	25498799
chr5	36868700	36869399
chr9	40455250	40455899
chr11	76672150	76673299
chr11	7212750	7214749
chr9	118925750	118926599
chr16	20672650	20673899
chr5	33628950	33629799
chr9	35326550	35327349
chr17	46202300	46203549
chr3	97658200	97658799
chr11	71003950	71004749
chr16	32332150	32333049
chr17	51812000	51813649
chr2	167563550	167564349
chr9	58822600	58823499
chr3	88535700	88537449
chr19	56722050	56724299
chr5	113770800	113773049
chr10	81320900	81321699
chr15	4026400	4027549
chr4	57567500	57568599
chr4	155704950	155705649
chr4	86856600	86857399
chr14	54431750	54432499
chr19	6084750	6085399
chr10	127666250	127667199
chr8	34964800	34965749
chr1	170868350	170868999
chr7	25297200	25298049
chr17	23802750	23804099
chr7	45123700	45124449
chr3	107695450	107696649
chr9	31912900	31914099
chr8	34146450	34147099
chr4	120032200	120033649
chr11	105126350	105126949
chr13	56134550	56135849
chr16	8737450	8738399
chr1	75478950	75479749
chr8	121578300	121578849
chr1	191717750	191719549
chr8	72474450	72475449
chr17	74528250	74529349
chr5	119830500	119834499
chr5	33721500	33722099
chr17	42876050	42877099
chr6	90369400	90370649
chr1	78488600	78489349
chr11	93885500	93886999
chr10	80576250	80578599
chr7	137437450	137438199
chr15	32244500	32246149
chr12	51347900	51349149
chr11	98149400	98150649
chr3	99248100	99249799
chr11	73160000	73160749
chr7	135715550	135716599
chr12	111538250	111539199
chr16	76372200	76373549
chr11	119085200	119086899
chr6	56704350	56704849
chr16	84703100	84703599
chr11	102818100	102820149
chr19	41911750	41912599
chr6	52258150	52260899
chr5	28071250	28072049
chr19	50677900	50679049
chr8	79710850	79711949
chr4	103119250	103119999
chr11	106919750	106921049
chr1	191906150	191907699
chr9	92542250	92542699
chr19	41846950	41848449
chr4	106560900	106561649
chr15	80013750	80014949
chr14	27067800	27068549
chr2	18031200	18032349
chr4	56801900	56802749
chr8	14095350	14096249
chr17	56256800	56258049
chr7	44770050	44770449
chr13	51258800	51259699
chr5	21055050	21056299
chr8	88627050	88627849
chr3	52101850	52104299
chr4	59437850	59438549
chr11	120597350	120598799
chr10	80115750	80117249
chr9	95405800	95407749
chr6	120036850	120038749
chr9	32672250	32672849
chr13	89539550	89539899
chr14	46882200	46883899
chr2	69822750	69823499
chr10	43722550	43723949
chr9	67830550	67831849
chr1	56972100	56973899
chr16	29813800	29814249
chr8	102983000	102984449
chr2	168912000	168913499
chr8	11311450	11313449
chr1	171072250	171073749
chr4	46991500	46991899
chr4	94602750	94603349
chr6	51468100	51471649
chr11	85832100	85835549
chr13	48227650	48228149
chr2	18028500	18029149
chr10	108161550	108163199
chr16	33056250	33057299
chr10	17947200	17948149
chr14	20545800	20546499
chr18	35562000	35563549
chr18	70568100	70569599
chr5	99728000	99729249
chr5	24474100	24475549
chr6	125008750	125009849
chr14	4110250	4110849
chr5	139791500	139792049
chr5	139149950	139150949
chr19	30029950	30031449
chr16	4878800	4880899
chr5	135393850	135394899
chr3	58691850	58692549
chr8	123332600	123333199
chr12	17992550	17993899
chr3	66985450	66985899
chr10	96617000	96618549
chr10	80560900	80561849
chr9	8003000	8005149
chr13	85288200	85289349
chr12	72069950	72071249
chr4	63494300	63496049
chr5	114130350	114131749
chr16	90283300	90284849
chr1	51477850	51478349
chr2	68470900	68472549
chr9	44498700	44499249
chr5	27790900	27791399
chr11	112781400	112783299
chr12	103241350	103242999
chr19	10948700	10949399
chr17	26839000	26839599
chr11	20543100	20543849
chr5	72913950	72914949
chr2	128943250	128944049
chr12	55230400	55230799
chr6	54594900	54595849
chr2	119476600	119478349
chr14	18238300	18239249
chr17	14202800	14203999
chr4	133011550	133013049
chr8	125569000	125569749
chr2	53190650	53192549
chr8	110997500	110997999
chr3	103914050	103915699
chr3	88949600	88951149
chr1	106171800	106173049
chr4	117494950	117496099
chr4	155563450	155564249
chr7	109519000	109520399
chr18	54986300	54989749
chr19	45017850	45018799
chr1	181143650	181144499
chr7	45128350	45128799
chr15	30172800	30173849
chr10	119239150	119240099
chr12	105784150	105785199
chr11	6199700	6200349
chr6	71908900	71909299
chr15	73422200	73423699
chr7	6155000	6156449
chr2	136713950	136714499
chr17	71616000	71617049
chr6	119543600	119544299
chr1	153486750	153487699
chr7	123123700	123124649
chr16	91484900	91485599
chr2	156720500	156722199
chr16	56075300	56075899
chr9	122351500	122352199
chr11	97663050	97664399
chr11	50376900	50379249
chr11	60878150	60878849
chr9	101251000	101251899
chr4	155812000	155813199
chr4	155991950	155993449
chr6	89361550	89362599
chr4	133756100	133757949
chr15	66285450	66286999
chr8	111643400	111643899
chr4	137357050	137357949
chr4	63214000	63214899
chr5	33657650	33658449
chr10	62127450	62131349
chr9	86464550	86465049
chr11	102437550	102438599
chr2	73775350	73775899
chr5	123683450	123684899
chr12	85455450	85455949
chr3	32397000	32398099
chr2	130697100	130697949
chr6	17463250	17464399
chr10	80754800	80755899
chr5	76588600	76589249
chr14	45219650	45220599
chr3	75955850	75957399
chr10	105841000	105841949
chr14	63860200	63860849
chr9	57521000	57521599
chr17	6948150	6948899
chr4	45408000	45409149
chr10	81544300	81545449
chr5	132541350	132543999
chr2	124609650	124610899
chr13	96130800	96131799
chr14	45529150	45530799
chr5	100037600	100040349
chr11	45955100	45955549
chr5	75574800	75576049
chr3	81036050	81037949
chr9	15044650	15045699
chr9	37030050	37030849
chr8	27174350	27174849
chr16	88599800	88600649
chr17	35915950	35917599
chr1	86064150	86065149
chr7	90129600	90130649
chr14	79480400	79481949
chr4	47473900	47474849
chr4	72199100	72200999
chr2	69861400	69862199
chr11	84870400	84871299
chr8	84256550	84257499
chr3	90051500	90052599
chr11	45851650	45852749
chr8	33929350	33930099
chr5	31202000	31202599
chr7	127232550	127233749
chr7	19003900	19005349
chr10	120898300	120899249
chr11	115513200	115514349
chr1	57406250	57406999
chr10	67538300	67539599
chr7	28810750	28811149
chr13	48870050	48870699
chr7	45628500	45628999
chr8	85036550	85038299
chr11	35120950	35122399
chr5	37893550	37893999
chr17	35836250	35838249
chr17	17826450	17828749
chr2	26902600	26903249
chr4	141722550	141723599
chr7	81706300	81707249
chr2	152081700	152082149
chr6	72957100	72958899
chr10	122984800	122986699
chr13	43303000	43304349
chr14	75844800	75846249
chr4	137276450	137277549
chr14	31829700	31831249
chr8	22974950	22975699
chr17	46327700	46328549
chr8	84978300	84979099
chr14	34548650	34549499
chr10	128035250	128036799
chr11	52360200	52361349
chr8	71611100	71611649
chr2	93642500	93644149
chr17	78199750	78201649
chr13	98890400	98891199
chr14	70077800	70081149
chr7	19278950	19280499
chr11	95384400	95385499
chr2	174075700	174076799
chr19	7056200	7057549
chr16	18876850	18877899
chr3	87948400	87949399
chr9	123112750	123113699
chr4	120268400	120269249
chr3	116594300	116595549
chr3	88081850	88082299
chr14	12821900	12822449
chr12	107979650	107980799
chr1	91249950	91250749
chr19	23687350	23688049
chr5	139252250	139252899
chr14	33446350	33447449
chr10	71237650	71238349
chr17	79354750	79356099
chr4	59783100	59783949
chr6	51196250	51197849
chr4	58911250	58913049
chr9	21238300	21239449
chr9	32986750	32987299
chr3	135438150	135440449
chr11	78163650	78165549
chr8	33599950	33600849
chr14	24003750	24005249
chr8	69881200	69882599
chr17	12725250	12725799
chr3	32817400	32818149
chr8	13287450	13288249
chr18	69124800	69125549
chr12	21417100	21418149
chr2	90940450	90941099
chr14	52013750	52014449
chr18	67724050	67724649
chr4	134286700	134288299
chr7	128417800	128418599
chr19	10688650	10689149
chr8	64205400	64205849
chr8	123253700	123254849
chr18	64887450	64888649
chr2	25607750	25608599
chr9	27029250	27030449
chr4	126255550	126256599
chr8	126945350	126946199
chr13	23423350	23423949
chr10	7390500	7393599
chr17	69383200	69384449
chr3	80878500	80878899
chr15	102955400	102957699
chr4	155601350	155602349
chr16	85172000	85173899
chr8	125053650	125055099
chr15	83666250	83666949
chr7	143548250	143549399
chr1	74661700	74662249
chr17	25809000	25809649
chr9	109094900	109096149
chr5	73491000	73491349
chr2	126875700	126876099
chr7	25278350	25279649
chr7	90442600	90444399
chr10	75060450	75062399
chr13	42049400	42049849
chr1	9943250	9944199
chr7	132812800	132814299
chr11	12035650	12038149
chr4	149425950	149426999
chr1	58392350	58393849
chr5	138155100	138155849
chr10	110911350	110911949
chr3	101604000	101604649
chr9	62980000	62981349
chr6	127153000	127155699
chr4	119539050	119540399
chr19	40270900	40271999
chr11	102295600	102297399
chr15	81585450	81586899
chr9	108189850	108190599
chr17	31854950	31855799
chr18	67448500	67449249
chr14	20694900	20696149
chr10	79554400	79555449
chr3	141464650	141465949
chr17	35059100	35059899
chr9	65100700	65102549
chr1	192136600	192138799
chr5	136244450	136245449
chr7	24507150	24507899
chr11	78032050	78032999
chr7	63757100	63759249
chr2	57116350	57117099
chr8	14321250	14321849
chr16	92697050	92698799
chr6	37870750	37871849
chr11	70764100	70764699
chr7	101969750	101970749
chr8	72421100	72421649
chr16	16302700	16303699
chr8	22859000	22860449
chr8	121116200	121117899
chr11	75173050	75173799
chr18	33794750	33795249
chr11	4746000	4747049
chr4	62524400	62525399
chr12	86678450	86679499
chr3	51483850	51484749
chr1	59762900	59764449
chr3	96268600	96269249
chr10	43578150	43580349
chr9	72132900	72133399
chr11	59290450	59290949
chr19	46317100	46317949
chr17	79894950	79896199
chr18	80362950	80363449
chr7	114116750	114118049
chr1	161070700	161071149
chr1	10232050	10232499
chr6	50109600	50110999
chr5	143293000	143294099
chr12	65172350	65172949
chr4	138394800	138396049
chr4	155491350	155492499
chr19	45782600	45783999
chr14	48120450	48121999
chr7	92668850	92669949
chr17	66448300	66449999
chr6	134920300	134921399
chr2	137113650	137117349
chr3	9609750	9610249
chr9	57836350	57837149
chr2	151980000	151980499
chr2	30171350	30172049
chr5	31240650	31241499
chr13	78197650	78199799
chr19	29522150	29523149
chr10	94036050	94036699
chr14	21830950	21832249
chr2	33018050	33018399
chr11	85311150	85312299
chr2	74655350	74656849
chr10	127620050	127621149
chr12	113187650	113188799
chr11	76243200	76244049
chr14	46387500	46389999
chr9	58487850	58488799
chr14	77156200	77157999
chr15	80254850	80256599
chr2	73273050	73274799
chr6	38875450	38876799
chr9	64172350	64173099
chr10	110744950	110745699
chr16	20141000	20141649
chr7	63444700	63445399
chr13	38036700	38037449
chr2	26139450	26140599
chr4	41135300	41136699
chr11	3963650	3964199
chr17	27634250	27635749
chr19	41482250	41483649
chr19	4192200	4192849
chr8	122550800	122551249
chr4	134923350	134924549
chr5	38560850	38562199
chr14	20793150	20794299
chr8	18846000	18847149
chr13	36116900	36118199
chr17	25014800	25016649
chr5	115193350	115194499
chrX	12007150	12007699
chr19	32387750	32389749
chr3	107631200	107631749
chrX	101222300	101222849
chr6	38636350	38637099
chr11	99040750	99042099
chr14	24779200	24779549
chr3	116661850	116662649
chr11	52231900	52232899
chr5	115326500	115328149
chr15	98145100	98145749
chr15	83779450	83779799
chr17	62883750	62884149
chr11	77686500	77687949
chr11	109269650	109270449
chr15	81399250	81400299
chr1	179802600	179803799
chr11	114851250	114853349
chr15	53344400	53346199
chr2	153527850	153528349
chr2	60209450	60210499
chr7	31126150	31126949
chr13	37826450	37827949
chr19	41263300	41264349
chr13	108316200	108316849
chr3	5210900	5211399
chr9	108490600	108491249
chr14	76504300	76505099
chr5	115300250	115301499
chr13	54686750	54687799
chr6	52210050	52213599
chr19	5490300	5491899
chr4	82504050	82505849
chr11	79253350	79254849
chr10	117709900	117710999
chrX	52611350	52613249
chr16	9994150	9995749
chr4	155693850	155695449
chr2	153528400	153530749
chr9	15306250	15306999
chr1	24586450	24587049
chr9	120933200	120934699
chr11	69416550	69419449
chr18	53463800	53465099
chr2	6322300	6323499
chr9	44604400	44606049
chr12	111038250	111040449
chr16	30008650	30009449
chr11	60175650	60177349
chr6	37441350	37442349
chr6	35354450	35355149
chrX	144318700	144319549
chr6	124756100	124757249
chr12	80790300	80791249
chr15	84681050	84681999
chr18	73702550	73704299
chr8	70352600	70353499
chr8	127063450	127065399
chr9	21091400	21092049
chr8	81014350	81015099
chr3	116007450	116008399
chr2	172933750	172934349
chr11	106612350	106612949
chr2	112454800	112455449
chr7	126272200	126273499
chr17	46889500	46891549
chr9	102354000	102354849
chr9	62536400	62536999
chr3	89962800	89963799
chr5	36695200	36696349
chr3	61002450	61003749
chr5	114774400	114775299
chr15	93397800	93399099
chr5	142463800	142464249
chr1	179545850	179547299
chr13	112926950	112927849
chr9	41580450	41584399
chr6	30304000	30304549
chr14	121035300	121036449
chr16	29893650	29894949
chr3	32510450	32511149
chr8	48843100	48843699
chr7	122969600	122970849
chr3	89772750	89774149
chr4	20777750	20778649
chr1	55026750	55027849
chr13	55835450	55836549
chr8	11634400	11635899
chr1	118388550	118390149
chr14	31000900	31001949
chr2	157204400	157204949
chr5	144767950	144768799
chr11	119942350	119942949
chr2	130839800	130840399
chr5	121711000	121711549
chr5	33438050	33438599
chr7	16046600	16048349
chr12	113098500	113098999
chr9	80066800	80068249
chr16	17619200	17619649
chr11	103116150	103116899
chr15	68258150	68259299
chr6	52202950	52207149
chr7	80114400	80115499
chr17	80727300	80728399
chr13	23621600	23622049
chr7	100121150	100121699
chr18	80714950	80715699
chr11	58103850	58104749
chr15	25984400	25985599
chr2	90917350	90918049
chr5	76304050	76305499
chr13	56159450	56160449
chr2	164070450	164071149
chr11	51263050	51263549
chr16	20619650	20622399
chr2	33630550	33632649
chr19	10456550	10457599
chr2	103795850	103797899
chr9	44920400	44921449
chr11	7063550	7065099
chr17	27512150	27513549
chr5	33274200	33275549
chr3	146812850	146813399
chr5	122049150	122050549
chrX	153498150	153499799
chr9	123021100	123021599
chr12	117152900	117153249
chr14	31435000	31436249
chr16	32246450	32247349
chr10	4386950	4388849
chr16	18392650	18393049
chr2	32151100	32151899
chr10	85916450	85917349
chr8	116732300	116733399
chr8	122661000	122661649
chr10	93309550	93311149
chrX	13071500	13072849
chr5	57715150	57716949
chr17	31564700	31565749
chr10	80797500	80799249
chr10	127339200	127342199
chr7	19473900	19474999
chr1	180812100	180814399
chr9	75625350	75626349
chr2	34772050	34772899
chr11	40692300	40692799
chr17	56626300	56627049
chr6	134926800	134927949
chr18	14783150	14783899
chr6	113531300	113532049
chr18	34506500	34506899
chr1	177257150	177258399
chr5	64802750	64804699
chr8	106935300	106936899
chr3	53863400	53864199
chr12	108274450	108275599
chr6	113076850	113078049
chr6	131387500	131388599
chr8	95488250	95488549
chr7	120981600	120982699
chr16	4963750	4965099
chr1	39535600	39536499
chr15	25412050	25413949
chr6	70791600	70792199
chr5	93205550	93206999
chr5	99977450	99978899
chr8	18950250	18951249
chr6	85451800	85452699
chr3	144201600	144202949
chr5	45856350	45858099
chr3	52268450	52270149
chr8	72135150	72136499
chr3	129532100	129534699
chr11	86544050	86545049
chr5	121711750	121713349
chr1	180640800	180641899
chr2	26501450	26504149
chr11	62456600	62458649
chr4	127021400	127023899
chr9	121276950	121277799
chr8	105518400	105519449
chrX	7318400	7319349
chr4	136469550	136470799
chr12	25097250	25097549
chr3	9608450	9609699
chr1	132008200	132008549
chr2	181458050	181459399
chr11	12025750	12026499
chr4	106847800	106848299
chr16	35983200	35984049
chr7	3703850	3704949
chr16	38742250	38742749
chr5	33651900	33652549
chr8	36612700	36614249
chr6	128437550	128438699
chr16	22264450	22265999
chr15	96459800	96461449
chr12	51690700	51692549
chr19	5637000	5637899
chr5	96160650	96162999
chr15	31529900	31531099
chr4	107802300	107803299
chr10	60218450	60219449
chr3	99665500	99666599
chr16	50431000	50432299
[truncated: 13,348 more rows]
