# Supplementary material for: GLI transcriptional repression regulates tissue-specific enhancer activity in response to Hedgehog signaling
Source: eLife. 2020 Jan 28;9:e50670. doi: 10.7554/eLife.50670 (PMC6986877; doi:10.7554/eLife.50670)
Supplement: Figure 6—source data 1. — Tab 1. Columns indicate VISTA enhancer IDs, coordinates, number of tissues with limb enhancer activity as annotated by the VISTA database (Visel et al., 2007) and its corresponding GBR category. Tabs 2–5. Normalized signal and called peaks for H3K27ac, ATAC, H3K4me1 and H3K4me2 in WT, and Shh-/- limbs if applicable, is listed for all HH-responsive GBRs (Tab 2- normalized signal; Tab 3-called peaks) and Stable GBRs (Tab 4- normalized signal, Tab 5-called peaks) that were shown to drive limb activity, as tested in the VISTA database. For called peaks in Tabs 3, 5, ‘NO’ denotes not a significantly called peak, ‘YES’ denotes a called peak. [file elife-50670-fig6-data1.xlsx]

## Sheet: VISTA_tissue_express
VISTA ID	Chr	start	end	Tissues with expression	GBR type
hs921	chr1	89847708	89849945	3	HH-responsive
hs906	chr8	80314046	80315940	4	HH-responsive
hs1613	chr8	121300361	121303557	1	HH-responsive		Columns indicate VISTA enhancer IDs, coordinates, number of tissues with enhancer activity as annotated by the VISTA database (Visel et al. 2007)
hs335	chr9	29318639	29319070	1	HH-responsive		and its corresponding GBR category.
hs1491	chr14	24985263	24987167	1	HH-responsive
hs1482	chr15	56165722	56167474	1	HH-responsive
mm1584	chr15	74155467	74158454	4	HH-responsive
mm1571	chr15	95638744	95641449	3	HH-responsive
mm1564	chr2	60785660	60787563	2	HH-responsive
hs1448	chr2	171730381	171736633	2	HH-responsive
hs280	chr4	117390982	117392314	1	HH-responsive
hs1445	chr11	75049027	75050435	1	HH-responsive
hs1635	chr1	75832718	75835169	2	Stable
mm1063	chr1	92789102	92792922	2	Stable
mm712	chr1	162074031	162077560	2	Stable
mm757	chr1	166047478	166050879	4	Stable
mm646	chr1	192798093	192800700	6	Stable
mm1476	chr2	128712175	128715819	4	Stable
mm423	chr2	4587585	4588762	4	Stable
hs1477	chr2	59562344	59563132	1	Stable
mm717	chr2	59597936	59601449	2	Stable
mm1603	chr2	137247708	137248975	3	Stable
hs774	chr3	5329674	5330756	1	Stable
hs1433	chr3	30104532	30109280	2	Stable
mm1010	chr3	51738852	51739856	3	Stable
hs1428	chr3	99665315	99667144	2	Stable
mm1505	chr3	101394801	101399299	4	Stable
hs1599	chr4	13786474	13789660	4	Stable
hs1447	chr4	58666631	58672430	1	Stable
hs305	chr4	82153582	82154380	2	Stable
hs1485	chr4	95317404	95319020	1	Stable
hs1309	chr4	98107609	98110094	5	Stable
hs1484	chr4	98221540	98224627	2	Stable
hs1622	chr4	105860013	105863946	3	Stable
hs1487	chr4	106864211	106867561	1	Stable
mm1527	chr4	106864588	106867291	3	Stable
mm1490	chr4	108361018	108364528	9	Stable
mm1506	chr4	139597441	139601336	2	Stable
mm1492	chr4	154707415	154711162	2	Stable
mm1088	chr4	154771105	154772345	3	Stable
mm1090	chr4	154801901	154803150	4	Stable
mm1576	chr5	16778223	16779671	2	Stable
mm428	chr5	37917742	37918594	4	Stable
mm429	chr5	37967623	37969196	4	Stable
mm1340	chr5	77486940	77489925	3	Stable
mm397	chr5	92997267	92998294	2	Stable
mm680	chr5	102373255	102375763	1	Stable
hs1271	chr5	111394040	111395157	1	Stable
hs925	chr5	131580375	131582371	2	Stable
mm1626	chr5	136861070	136864935	3	Stable
mm1619	chr5	142999832	143002122	3	Stable
mm398	chr6	4483463	4485322	1	Stable
mm406	chr6	50983967	50984810	2	Stable
hs1600	chr6	51001488	51004105	5	Stable
hs1465	chr6	51194712	51198223	2	Stable
mm48	chr6	52442617	52444529	1	Stable
hs1430	chr6	52967026	52969651	1	Stable
hs1604	chr6	53468299	53472380	5	Stable
mm123	chr6	72215186	72218828	4	Stable
mm1474	chr6	72710179	72712952	2	Stable
hs1479	chr6	84196001	84198367	2	Stable
hs1603	chr6	143497298	143500849	3	Stable
mm1750	chr6	143498602	143500656	1	Stable
mm1514	chr7	82713868	82717092	1	Stable
mm729	chr7	83811918	83815428	3	Stable
hs1435	chr7	98956508	98958633	2	Stable
mm686	chr7	108796607	108799113	4	Stable
hs1314	chr7	112824612	112827409	5	Stable
mm1484	chr7	123096694	123099867	4	Stable
mm938	chr7	130425765	130427321	4	Stable
hs1488	chr7	142547512	142549546	4	Stable
mm50	chr7	142551566	142554813	4	Stable
mm47	chr7	142568912	142573912	4	Stable
mm1497	chr7	145204877	145207696	6	Stable
mm610	chr8	25342689	25344335	3	Stable
mm612	chr8	25543011	25545762	6	Stable
mm1598	chr8	26832486	26834858	6	Stable
mm1688	chr8	56914551	56916754	2	Stable
mm1615	chr8	84741861	84745040	2	Stable
mm1567	chr8	87659116	87661534	2	Stable
mm1483	chr8	90860971	90863490	7	Stable
mm1211	chr8	91712437	91716525	2	Stable
hs1612	chr8	108025350	108029327	4	Stable
mm1674	chr8	120423908	120427305	6	Stable
mm149	chr8	125217043	125219851	3	Stable
mm1464	chr8	126825533	126828569	2	Stable
mm1617	chr9	43252109	43255189	2	Stable
mm577	chr9	37053339	37055278	7	Stable
mm1624	chr9	40729777	40732407	1	Stable
mm1486	chr9	41227902	41230545	1	Stable
mm734	chr9	41889010	41892513	2	Stable
mm1493	chr9	41949140	41954525	2	Stable
mm29	chr9	61600844	61603666	5	Stable
mm1518	chr9	63958315	63961551	1	Stable
mm1473	chr9	72639094	72641466	2	Stable
mm898	chr9	88048577	88050948	2	Stable
mm1475	chr9	106354104	106358319	2	Stable
hs1452	chr10	45893125	45894696	1	Stable
mm1692	chr10	67001918	67005347	4	Stable
mm694	chr10	87868234	87870738	5	Stable
hs1427	chr10	125809054	125811061	3	Stable
hs1468	chr10	125921037	125928970	1	Stable
mm1290	chr11	17449238	17451378	2	Stable
mm1465	chr11	18712145	18713157	1	Stable
mm57	chr11	26489088	26491733	4	Stable
hs1130	chr11	45549892	45551315	1	Stable
mm627	chr11	111563100	111564002	1	Stable
hs1467	chr11	111827905	111829224	1	Stable
mm636	chr11	113013633	113014961	3	Stable
mm1462	chr11	113783367	113787793	7	Stable
mm1622	chr11	118238372	118241185	3	Stable
hs1273	chr12	9337517	9339601	4	Stable
hs388	chr12	25891576	25892364	2	Stable
hs644	chr12	34199630	34200876	3	Stable
hs1616	chr12	79846272	79849070	4	Stable
mm1300	chr13	51220265	51222697	1	Stable
hs1473	chr13	56159018	56161187	1	Stable
hs516	chr13	118713610	118715012	1	Stable
hs484	chr14	21990858	21991990	5	Stable
mm414	chr14	22113215	22115951	5	Stable
hs1434	chr14	23014212	23023263	2	Stable
mm1485	chr14	24261692	24264509	1	Stable
hs1436	chr14	28972334	28973645	2	Stable
hs1414	chr14	46605651	46606520	1	Stable
mm1570	chr14	49121140	49122633	1	Stable
mm1112	chr14	105571300	105573847	3	Stable
hs919	chr15	50664833	50666650	1	Stable
hs1877	chr15	63052414	63053178	6	Stable
mm84	chr15	83638828	83640718	3	Stable
hs1431	chr16	15052402	15053742	3	Stable
mm466	chr16	15084592	15085708	5	Stable
hs1620	chr16	17808169	17811091	4	Stable
mm1629	chr16	17809211	17811153	2	Stable
mm321	chr16	18554168	18557637	4	Stable
mm1097	chr16	26040838	26042843	2	Stable
hs1453	chr16	29893116	29895809	3	Stable
hs1516	chr16	95847910	95849564	4	Stable
hs1461	chr17	44296915	44302724	2	Stable
mm755	chr17	29462413	29466116	3	Stable
mm1620	chr17	46617885	46620197	3	Stable
mm751	chr17	47988296	47991797	4	Stable
mm1105	chr17	83913105	83914232	3	Stable
mm1614	chr18	35847683	35850399	3	Stable
mm1457	chr18	38378941	38381638	4	Stable
mm1061	chr18	55624016	55627654	3	Stable
mm1623	chr18	60669095	60671807	2	Stable
hs1440	chr18	78236924	78239279	3	Stable
hs1464	chr18	78266847	78268995	1	Stable
hs1004	chr19	14123241	14124629	5	Stable
hs313	chr19	14890554	14892150	2	Stable
mm448	chr19	59423214	59425570	3	Stable
mm449	chr19	60015442	60016837	2	Stable

## Sheet: HHresp-FCsummary
chromosome	start	end	ATAC..WT.avg	ATAC..Shh.null.avg	ATAC..WT.Shh.log2FC	H3K27ac_WTinputFC	H3K27ac_SHHinputFC	H3K27ac_WTSHHFC	H3K4me2_WTinputFC	H3K4me2_SHHinputFC	H3K4me2_WTSHHFC	H3K4me1_WTinputFC
chr1	89848250	89849599	4.5536	4.60622	-0.0526132	2.13498	0.978321	1.73779	1.87395	1.18702	0.535414	2.35532
chr11	75049800	75050049	2.23792	2.03296	0.204953	1.82716	1.28228	0.519834	0.853181	0.189649	-0.476457	1.67223
chr14	24985750	24986299	3.38444	3.0196	0.364843	3.12077	1.34077	1.61595	0.615673	-0.00258722	0.574653	2.22587
chr15	56166150	56166749	2.97778	3.48705	-0.509269	2.48989	1.35923	1.32526	0.89059	1.27408	-0.201359	1.37525
chr15	95640350	95640999	2.72547	3.33153	-0.60606	2.10019	1.18793	0.581473	1.04171	0.783879	0.223678	1.68123
chr15	74156100	74156849	4.4295	3.88444	0.545066	1.44961	-0.118448	1.86218	0.604265	0.0748709	0.394826	2.28659
chr2	171734150	171735649	5.16346	6.22953	-1.06607	4.93046	2.965	1.5819	0.400314	1.63689	-0.0878272	1.69837
chr2	60785900	60786949	4.42661	5.694	-1.26739	3.24553	1.15058	1.66057	0.659194	0.877595	-0.432238	1.84779
chr4	117391600	117392399	3.96364	4.31804	-0.354408	3.28107	1.47985	1.46269	1.77689	1.50634	0.123923	2.35823
chr8	121300500	121301999	5.57761	5.16197	0.415648	3.57502	1.38388	2.4912	2.41206	2.3704	-0.0301191	2.39543
chr8	80314400	80314649	2.01266	1.61583	0.396835	2.5822	-0.088522	2.84543	0.665504	1.05822	0.120897	1.9945
chr9	29318700	29319199	4.43698	4.51102	-0.0740408	2.74631	0.548612	1.33641	1.58259	1.08021	0.156359	2.23113

## Sheet: Hhresp_peaks
chromosome	start	end	GBR_Type	H3K27ac	ATAC	H3K4me1	H3K4me2
chr1	89848250	89849599	HH-dep	YES	YES	YES	NO
chr11	75049800	75050049	HH-sens	YES	NO	YES	NO
chr14	24985750	24986299	HH-dep	YES	YES	YES	NO
chr15	56166150	56166749	HH-dep	YES	YES	NO	NO
chr15	95640350	95640999	HH-dep	YES	NO	YES	NO
chr15	74156100	74156849	HH-dep	YES	YES	YES	NO
chr2	171734150	171735649	HH-sens	YES	YES	YES	NO
chr2	60785900	60786949	HH-sens	YES	YES	YES	NO
chr4	117391600	117392399	HH-sens	YES	YES	YES	YES
chr8	121300500	121301999	HH-dep	YES	YES	YES	YES
chr8	80314400	80314649	HH-dep	YES	NO	YES	NO
chr9	29318700	29319199	HH-dep	YES	YES	YES	YES
*YES/NO denotes overlap with called peaks

## Sheet: Stable-FCSummary
chromosome	start	end	ATAC..WT.avg	ATAC..Shh.null.avg	ATAC..WT.Shh.log2FC	H3K27ac_WTinputFC	H3K27ac_SHHinputFC	H3K27ac_WTSHHFC	H3K4me2_WTinputFC	H3K4me2_SHHinputFC	H3K4me2_WTSHHFC	H3K4me1_WTinputFC
chr1	75833024	75834023	3.37201	4.34974	-0.977732	4.17672	3.29328	0.432773	1.92051	1.84244	0.00602662	1.68953
chr1	92790824	92791823	5.14614	5.16769	-0.0215549	4.01489	3.4164	0.000414608	2.01079	2.20927	0.172039	2.29309
chr1	162074350	162075349	4.03688	4.84885	-0.811974	4.77886	5.09029	0.0848346	0.775116	0.362357	0.458116	1.52019
chr1	166048974	166049973	4.64197	4.8242	-0.182224	2.70766	2.2466	0.488093	2.22651	1.47857	0.167665	2.47234
chr1	192799050	192800399	5.03508	5.84841	-0.813327	3.94666	3.57977	0.211075	1.72816	1.51579	0.0539457	2.28235
chr10	45893600	45894599	4.31498	4.71293	-0.397948	4.78857	4.24471	0.793292	0.682261	1.14344	-0.3158	1.80002
chr10	67003150	67004999	5.69033	5.88807	-0.19774	5.0056	4.76187	0.237587	2.69123	3.02596	-0.0817879	1.9179
chr10	87868650	87869649	3.63248	4.92663	-1.29414	3.98919	4.18821	0.0307263	1.05482	1.49299	-0.219814	1.56369
chr10	125809750	125810749	4.36376	4.99293	-0.629177	4.26256	3.50224	0.524332	1.03637	1.19403	-0.0343495	1.81236
chr10	125921700	125922699	4.50479	4.74972	-0.244934	3.0526	2.96696	0.773689	1.38157	1.32494	-0.154872	2.15973
chr11	17450124	17451123	4.48365	5.10093	-0.61728	2.48746	2.3579	0.0473892	1.08497	0.771681	0.262334	1.87894
chr11	18712424	18713423	4.21858	4.1649	0.0536804	1.95745	1.79745	-0.0333111	0.786363	0.511579	0.192374	1.99675
chr11	26489724	26490723	4.75625	4.84342	-0.087176	4.2216	3.4489	-0.163393	0.848032	1.05907	0.183159	1.73341
chr11	45550174	45551173	4.73362	6.09546	-1.36184	4.11758	3.02236	0.552842	0.64132	1.35403	-0.356079	1.81388
chr11	111562850	111563849	2.55745	2.73436	-0.176913	3.49986	2.82528	0.912937	1.02992	1.00482	-0.00930565	1.80921
chr11	111828150	111829149	3.54326	4.2305	-0.687239	3.08597	2.74523	0.457317	0.873965	0.990801	0.0848916	2.02816
chr11	113014074	113015073	3.94142	4.96597	-1.02455	4.15491	4.05961	0.416561	1.24183	1.13628	-0.272451	1.98612
chr11	113785150	113786149	5.12495	5.61875	-0.493794	4.69311	4.44354	0.159703	1.91846	1.72824	0.315263	2.12399
chr11	118239024	118240023	4.24521	4.08503	0.160181	4.05471	3.43523	0.293455	1.5178	1.52594	-0.170536	2.5376
chr12	9338624	9339623	3.45045	3.69939	-0.248942	3.99275	3.45821	0.38809	1.32848	1.72167	-0.257448	2.04833
chr12	25891450	25892449	3.5976	3.81175	-0.214149	2.21489	1.51866	0.398531	0.205644	0.392629	-0.237941	2.00188
chr12	34199774	34200773	4.54844	6.06981	-1.52136	4.61577	4.0476	0.374847	0.644446	0.188968	0.145845	1.8682
chr12	79846450	79847449	4.33494	5.57978	-1.24484	4.90968	3.82842	0.252531	1.08027	1.08508	0.38836	2.39198
chr13	51221000	51221999	4.0043	5.03332	-1.02902	4.66242	4.93591	-0.240062	1.04336	0.728355	0.327178	2.17471
chr13	56159424	56160423	5.86279	6.30011	-0.437318	4.64567	5.02609	0.144132	1.88356	1.61054	-0.166459	2.12102
chr13	118713874	118714873	4.4618	4.26468	0.197119	3.76313	2.66361	0.906207	3.00846	3.36598	-0.101192	1.38685
chr14	21990824	21991823	3.69931	4.62496	-0.925655	2.10503	2.25493	0.21118	2.12414	2.89139	-0.243285	1.79319
chr14	22114700	22115699	3.90777	4.09716	-0.189396	2.53502	2.13858	0.426538	1.41658	0.98116	0.389571	2.18252
chr14	23015150	23016149	4.06858	5.02391	-0.955328	4.3258	3.61669	0.422643	2.20816	1.19415	0.247243	1.73928
chr14	24262524	24263523	4.77546	4.8119	-0.0364444	4.9647	4.43677	-0.0144439	1.15502	1.00261	0.0922783	2.00859
chr14	28972424	28973423	3.5895	4.93589	-1.34639	4.22817	3.61339	0.183923	0.979122	0.81978	0.197381	2.2833
chr14	46604774	46605773	4.60619	5.45907	-0.852876	3.69158	3.4002	0.256718	1.62913	1.44633	-0.267238	2.15676
chr14	49121400	49122399	3	3.35772	-0.357721	3.46719	2.7768	0.0173316	0.607425	1.47983	-0.259551	1.38335
chr14	105572024	105573023	4.32762	5.1683	-0.840679	2.51072	2.56746	0.520451	1.29871	1.97752	-0.311336	2.26675
chr15	50664400	50665399	4.46857	4.89053	-0.421953	4.4696	3.82734	0.284303	0.797559	0.569634	-0.39217	1.35606
chr15	63052250	63053249	3.58562	4.04375	-0.45813	2.23255	2.25874	0.550998	1.12976	0.545464	-0.155651	2.15218
chr15	83638850	83639849	4.60619	4.73557	-0.129375	3.53003	2.90263	0.531344	0.832269	0.872663	0.151031	2.83983
chr16	15052750	15053749	5.03696	5.81631	-0.779349	4.23709	4.26995	-0.134014	1.50395	2.01144	-0.316241	1.93901
chr16	15084750	15085749	4.47711	5.13756	-0.660457	4.98585	4.43994	-0.1499	2.49008	2.82227	0.219279	1.47702
chr16	17809424	17810423	4.79585	4.71807	0.0777727	4.98048	4.28117	-0.185621	1.21248	1.13339	0.474445	2.56923
chr16	17809424	17810423	4.79585	4.71807	0.0777727	4.98048	4.28117	-0.185621	1.21248	1.13339	0.474445	2.56923
chr16	18554874	18555873	5.02297	4.91437	0.108599	3.79922	3.34554	0.00227688	1.54358	1.13126	-0.0303137	3.05264
chr16	26041324	26042323	4.58166	4.87092	-0.289264	3.40527	3.34439	-0.0376054	1.73846	1.62164	-0.167513	2.4007
chr16	29893900	29894899	4.13466	4.45465	-0.31999	3.01613	2.29554	0.569933	1.96444	1.64218	0.405466	2.54695
chr16	95847924	95848923	4.77662	5.02302	-0.246395	4.84887	4.06304	0.454961	1.1548	1.19128	-0.113956	1.92205
chr17	44300150	44301399	4.32056	4.61979	-0.299231	2.12572	1.90267	0.410781	1.07069	1.26997	0.123865	1.99774
chr17	29465174	29466173	3.16345	3.36723	-0.203779	3.99837	3.26183	0.91518	1.80553	2.00645	-0.0837975	2.37546
chr17	46618474	46619473	4.34133	4.6038	-0.262472	5.17369	5.73627	0.307339	2.45144	2.07489	0.263978	2.51538
chr17	47989800	47990799	4.03428	4.38489	-0.350607	3.39794	3.04758	0.638994	1.38194	1.73452	0.0423031	2.83402
chr17	83913450	83914449	3.33537	4.58077	-1.2454	4.51056	4.71117	-0.0560741	0.65683	0.996405	0.0134441	2.59021
chr18	35847550	35848549	4.91907	4.8941	0.0249664	2.48799	2.65957	0.352965	2.38189	2.33561	0.0264579	2.88081
chr18	38379600	38380599	4.61496	4.83465	-0.219685	3.22094	3.9514	0.190074	2.01484	1.79613	0.120332	2.35007
chr18	55623850	55624849	3.84987	5.05674	-1.20687	4.02442	3.4473	0.541933	1.56016	0.936228	0.0387498	1.6859
chr18	60670100	60671099	4.91377	4.70716	0.206604	4.90634	5.31292	0.125033	1.62584	1.25876	0.254499	2.5255
chr18	78237350	78238649	5.05748	6.09168	-1.0342	6.11832	4.80694	0.646682	2.04055	1.65543	0.280457	1.40993
chr18	78267250	78268249	4.90836	6.49184	-1.58347	3.62182	3.80049	0.273458	1.15734	0.305006	0.390915	1.56141
chr19	14123550	14124549	3.29459	3.572	-0.277407	2.18516	2.02989	0.122417	1.89082	1.0622	-0.0168108	2.05164
chr19	14890224	14891223	4.51068	5.73709	-1.22641	3.51728	2.53074	0.455569	2.31344	1.7933	0.0510263	1.75529
chr19	59423500	59424499	3.50097	3.8815	-0.380534	2.51147	2.20727	-0.0391041	1.52891	1.37735	0.189603	1.89524
chr19	60015624	60016623	3.69496	4.84272	-1.14776	2.57813	2.51048	0.592196	1.18245	1.45505	-0.160783	2.13376
chr2	128713224	128714223	4.12397	4.87175	-0.747779	5.29766	5.18584	0.328517	1.40084	1.75368	0.0409028	1.96109
chr2	4587500	4588499	3.49834	4.37483	-0.876489	4.11457	4.32238	-0.0962802	1.37091	1.41705	0.155581	2.19638
chr2	59562350	59563349	4.1909	5.12829	-0.937397	3.61563	3.38757	0.139956	1.25587	1.26264	0.35205	1.73029
chr2	59599574	59600573	5.01216	5.86745	-0.855292	5.02073	5.03339	-0.047319	1.71142	2.27484	-0.32694	1.86775
chr2	137247824	137248823	3.54331	4.61814	-1.07482	3.6826	1.73105	1.29169	1.16312	1.25113	-0.174926	1.99045
chr3	5329374	5330373	3.81201	5.39225	-1.58024	4.15331	4.43267	-0.159729	1.1486	0.964677	0.196094	2.10161
chr3	30104950	30105949	3.77205	4.22589	-0.453839	5.86753	4.92431	0.377535	1.55353	1.71802	0.0879205	2.12345
chr3	51739124	51740123	4.34133	4.21809	0.12324	2.59268	1.85601	0.46892	1.25265	1.25328	-0.147254	2.04613
chr3	99665550	99666549	5.09515	5.98382	-0.888667	5.25841	4.04691	0.354031	0.186601	0.543072	-0.463953	2.19839
chr3	101395074	101396073	4.28745	4.41443	-0.126975	5.10293	5.02109	0.224352	1.47434	1.33029	0.167328	2.74736
chr4	13787600	13788599	3.21878	4.51633	-1.29755	4.40351	3.62934	0.522022	0.956421	1.58434	-0.44578	1.79614
chr4	58670350	58671349	4.28348	6.06297	-1.77949	4.32638	4.28894	0.358699	1.61688	1.0191	0.110236	1.10789
chr4	82153224	82154223	3.16351	4.34974	-1.18623	2.37047	2.25449	0.377396	0.718701	0.546232	-0.0339569	2.56419
chr4	95317574	95318573	5.21329	5.44983	-0.236546	4.62606	5.013	0.194203	1.61771	1.71906	-0.192409	2.65854
chr4	98107750	98108749	3.69941	5.22502	-1.52562	4.62111	4.88765	-0.215916	1.52993	2.03901	0.101625	2.24076
chr4	98223124	98224123	4.79925	5.31732	-0.518072	4.59714	4.46952	0.0935882	0.182093	0.882181	-0.106961	1.40882
chr4	105860850	105861849	4.42946	4.89053	-0.461072	4.02689	4.08366	-0.0233433	0.975407	1.02183	-0.200588	2.15
chr4	106865450	106866449	4.1102	4.52081	-0.410602	5.15938	5.02827	0.0992805	2.22516	2.25592	0.183457	2.52547
chr4	106866024	106867023	3.88584	4.07862	-0.192783	4.97362	4.84993	0.00884791	1.68413	2.01428	0.325674	2.73978
chr4	108362550	108363799	5.05651	5.05525	0.00125695	5.17847	3.8824	1.44646	1.85284	2.10432	-0.186343	2.22296
chr4	139598774	139599773	3.96863	4.56754	-0.598911	4.05712	4.15333	0.345342	2.05747	2.15684	0.177021	2.48072
chr4	154709400	154710399	4.4358	5.08852	-0.652718	5.06789	5.32184	0.107131	0.289197	0.400532	-0.136365	2.728
chr4	154771374	154772373	4.64197	5.58664	-0.944673	4.32675	3.78321	0.0600659	0.603955	0.513125	0.0124123	2.62106
chr4	154801974	154802973	3.83282	4.22631	-0.393484	2.73806	3.04486	-0.184442	1.86089	1.93718	-0.224692	2.89172
chr5	16778274	16779273	3.27002	3.2182	0.0518122	4.44733	4.03783	0.305432	0.434131	1.32095	-0.300476	1.50082
chr5	37917650	37918649	4.16652	4.52831	-0.361783	3.42646	3.16324	0.126546	2.42046	0.969817	-0.0550685	2.03004
chr5	37967124	37968123	4.3553	4.78866	-0.433358	4.53229	4.09811	-0.301432	1.77357	1.39591	0.115278	2.13224
chr5	77488050	77489049	4.08389	4.37639	-0.292496	4.36525	4.40029	-0.0699719	1.7302	1.50913	-0.0804069	2.55149
chr5	92997150	92998349	4.5474	4.53722	0.0101803	4.3132	4.0477	-0.0932388	1.91979	1.19581	0.0585491	2.79107
chr5	102374150	102375149	3.79767	5.35514	-1.55747	3.0418	2.2012	0.331746	1.69415	1.39937	-0.082623	1.93988
chr5	111393650	111394649	4.10082	4.77208	-0.671265	2.84111	3.40035	-0.380052	1.71413	1.80021	-0.0489219	2.1382
chr5	131581274	131582273	3.50097	3.66675	-0.165784	2.42625	2.52402	0.33043	2.02001	2.04436	0.0588643	2.54672
chr5	136860924	136861923	4.7798	4.9997	-0.219898	5.02371	4.6855	0.357465	2.63837	2.23923	0.250739	2.67572
chr5	143000624	143001623	4.188	4.1686	0.0193958	3.87279	3.66046	0.177971	1.74724	1.76476	-0.127625	2.45485
chr6	4483850	4484849	3.54326	3.67967	-0.136407	4.41976	4.86591	0.0758482	1.74095	2.68301	0.0696077	2.32234
chr6	50984024	50985023	3.68746	3.35326	0.334203	4.5757	3.29323	1.24811	2.25126	1.94676	-0.00325917	2.39828
chr6	51002400	51003399	3.06736	3.96364	-0.896282	4.42547	3.34049	0.464608	1.32614	1.29575	-0.347608	2.19294
chr6	51196124	51197123	4.17177	5.56858	-1.39681	4.13494	4.3982	0.512862	2.15728	1.31235	0.274014	2.66552
chr6	52443050	52444049	3.82901	3.94117	-0.112164	2.5529	1.94458	0.882767	1.2341	1.1127	-0.242745	2.42182
chr6	52967374	52968373	3.39516	4.54612	-1.15096	4.31685	3.91671	0.813555	0.65946	1.11296	0.0828614	1.68601
chr6	53468774	53469773	2.77168	3.28318	-0.511494	1.81336	2.26994	-0.423152	1.18385	0.60711	-0.00843678	2.20621
chr6	72216500	72217499	4.89288	5.89482	-1.00193	3.4618	2.78242	0.177526	1.0368	1.88847	-0.105749	2.32897
chr6	72217950	72218949	3.25386	3.80835	-0.554488	2.9818	2.45457	0.493548	0.966877	0.881508	0.0975418	2.89865
chr6	72711200	72712199	4.93407	5.58301	-0.648944	4.43262	4.52663	0.325139	0.822529	1.05946	-0.49167	2.2289
chr6	84197400	84198399	4.63187	4.10203	0.529842	3.15027	2.14745	0.736077	0.414069	0.516397	0.163146	2.1887
chr6	143499400	143500399	3.84355	4.44876	-0.605211	4.18479	3.40516	0.481942	1.09457	1.79797	-0.0360413	1.77086
chr7	82714950	82715949	3.9792	4.85584	-0.876641	4.71833	4.18758	-0.0896223	1.64294	1.83492	0.201764	2.39655
chr7	83813650	83814649	4.45832	5.13476	-0.676445	4.24247	4.31695	0.400215	0.40972	1.21516	-0.0835743	2.2813
chr7	98956900	98957899	4.89493	5.90799	-1.01306	3.71565	3.58136	0.29325	1.11181	0.889093	0.140304	1.69972
chr7	108797174	108798173	4.47811	5.20024	-0.722121	4.9204	4.96962	0.585937	-0.0300422	0.838644	-0.504995	1.25113
chr7	112825950	112826949	4.26474	4.75429	-0.489557	3.80604	4.22515	0.268934	1.69417	1.67129	-0.234222	2.54739
chr7	123097550	123098549	4.35888	4.81498	-0.456097	5.17683	4.5096	0.236368	1.06875	1.32982	-0.0637109	2.00193
chr7	130425724	130426723	2.35604	3.0196	-0.663558	4.53645	3.9157	0.368599	1.25484	2.10059	-0.189919	1.99357
chr7	142547674	142548673	4.81599	5.32149	-0.505509	5.2238	5.05813	0.37264	1.46655	1.43488	0.114879	2.68828
chr7	142552400	142553749	4.80009	4.93866	-0.13857	4.97845	4.72944	0.213584	1.51418	1.62255	0.286505	2.76826
chr7	142571300	142572299	4.11736	4.3485	-0.231148	3.06359	2.66003	0.184209	0.155092	0.889372	-0.526702	2.81625
chr7	145205850	145206849	5.22077	4.86473	0.356034	4.71349	3.52804	0.534422	2.12173	1.97178	-0.220856	2.92147
chr8	25343050	25344049	4.56193	5.05525	-0.493325	2.86147	2.82866	0.336989	1.50414	2.18933	-0.26732	2.17745
chr8	25543050	25544049	4.95286	4.65756	0.295301	3.29375	3.71699	0.306883	2.67204	2.13145	0.104008	2.32159
chr8	26833050	26834049	4.14934	4.62496	-0.475622	3.02131	1.4383	1.08955	1.30085	1.14555	0.193338	2.68505
chr8	56915700	56916699	3.44307	3.82576	-0.382698	3.3011	3.31866	0.651637	0.898914	1.60271	-0.333278	2.08288
chr8	84742100	84743749	5.2239	5.32732	-0.103427	4.25889	4.1985	0.211074	2.32453	2.13509	0.0212806	2.77686
chr8	87660674	87661673	4.54844	4.19182	0.35662	2.3282	1.22955	1.06429	2.22719	2.44449	0.155719	2.92877
chr8	90861624	90862623	4.67391	5.41227	-0.738358	5.20429	4.85563	0.233824	1.37982	1.65732	0.258859	2.10237
chr8	91713624	91714623	3.61733	4.69484	-1.07751	3.7486	3.82033	-0.243267	2.31147	1.38899	0.260667	2.7211
chr8	108027500	108028649	4.35977	5.7203	-1.36053	4.83877	3.67101	0.1314	1.85009	0.965317	0.212102	2.07077
chr8	120425074	120426073	4.78774	4.75043	0.0373105	2.10843	1.22141	1.22715	1.14366	0.678513	0.547085	3.33167
chr8	125218474	125219473	3.67689	4.33984	-0.662947	4.70411	4.39743	-0.0813162	1.54147	1.83261	-0.0744948	2.57217
chr8	126825974	126826973	4.60413	5.24222	-0.638088	4.50382	4.27751	0.25335	1.40255	0.781964	0.410099	2.20064
chr9	43252650	43253649	4.46257	4.67492	-0.212346	5.40348	4.87918	0.193432	1.61506	1.34642	0.0634778	2.34374
chr9	37053774	37054773	4.88117	4.7957	0.0854687	3.9474	3.68466	0.659008	2.23941	2.00332	0.318025	3.01746
chr9	40730274	40731273	4.42004	4.90377	-0.483732	5.24405	4.37056	0.147943	2.16194	2.5456	-0.134211	1.63752
chr9	41228600	41229599	4.6962	5.41178	-0.715586	5.1264	4.20736	0.11685	0.928323	0.813991	-0.0410115	1.70108
chr9	41890050	41891099	3.92579	4.54756	-0.62177	4.33194	4.63745	-0.0324998	2.53356	2.46799	0.119054	2.07928
chr9	41950150	41951149	4.64036	5.5714	-0.931041	5.1336	5.24162	0.0489926	1.92171	0.978064	0.449778	2.33806
chr9	61602274	61603273	3.50177	4.08058	-0.578809	3.47382	2.99497	0.0281757	0.630576	1.08483	0.025052	2.20549
chr9	63959750	63960749	4.10082	4.63812	-0.537302	4.51624	3.98279	0.432305	2.25736	1.92657	0.30283	2.69302
chr9	72639750	72640749	4.72973	4.9487	-0.218968	5.73485	5.07749	0.285663	2.41521	1.55116	0.655374	1.96671
chr9	88049200	88050199	4.41854	4.82493	-0.406389	4.64166	3.83557	0.467562	0.745454	2.00303	-0.0945607	2.14779
chr9	106355824	106356823	4.74826	4.84898	-0.100727	4.75772	4.8414	0.134175	1.1506	1.13122	0.295778	2.70503

## Sheet: Stable_peaks
chromosome	start	end	H3K27ac	ATAC	H3K4me1	H3K4me2
chr1	75833024	75834023	YES	NO	NO	YES
chr1	92790824	92791823	YES	YES	YES	YES
chr1	162074350	162075349	YES	YES	YES	NO
chr1	166048974	166049973	YES	YES	YES	YES
chr1	192799050	192800399	YES	YES	YES	YES
chr10	45893600	45894599	YES	YES	NO	YES
chr10	67003150	67004999	YES	YES	YES	YES
chr10	87868650	87869649	YES	YES	YES	NO
chr10	125809750	125810749	YES	YES	YES	YES
chr10	125921700	125922699	YES	YES	YES	NO
chr11	17450124	17451123	YES	YES	YES	NO
chr11	18712424	18713423	YES	YES	YES	NO
chr11	26489724	26490723	YES	YES	YES	NO
chr11	45550174	45551173	YES	YES	YES	NO
chr11	111562850	111563849	YES	NO	YES	NO
chr11	111828150	111829149	YES	NO	YES	NO
chr11	113014074	113015073	YES	YES	YES	YES
chr11	113785150	113786149	YES	YES	YES	YES
chr11	118239024	118240023	YES	YES	YES	YES
chr12	9338624	9339623	YES	NO	YES	NO
chr12	25891450	25892449	YES	NO	YES	NO
chr12	34199774	34200773	YES	YES	YES	NO
chr12	79846450	79847449	YES	YES	YES	NO
chr13	51221000	51221999	YES	YES	YES	NO
chr13	56159424	56160423	YES	YES	YES	NO
chr13	118713874	118714873	YES	YES	NO	YES
chr14	21990824	21991823	YES	YES	YES	YES
chr14	22114700	22115699	YES	YES	YES	NO
chr14	23015150	23016149	YES	YES	YES	YES
chr14	24262524	24263523	YES	YES	YES	NO
chr14	28972424	28973423	YES	YES	YES	NO
chr14	46604774	46605773	YES	YES	YES	YES
chr14	49121400	49122399	YES	NO	YES	YES
chr14	105572024	105573023	YES	YES	YES	YES
chr15	50664400	50665399	YES	YES	NO	YES
chr15	63052250	63053249	YES	YES	YES	NO
chr15	83638850	83639849	YES	YES	YES	NO
chr16	15052750	15053749	YES	YES	YES	YES
chr16	15084750	15085749	YES	YES	NO	YES
chr16	17809424	17810423	YES	YES	YES	YES
chr16	17809424	17810423	YES	YES	YES	YES
chr16	18554874	18555873	YES	YES	YES	YES
chr16	26041324	26042323	YES	YES	YES	YES
chr16	29893900	29894899	YES	YES	YES	YES
chr16	95847924	95848923	YES	YES	YES	YES
chr17	44300150	44301399	YES	YES	YES	YES
chr17	29465174	29466173	YES	NO	YES	YES
chr17	46618474	46619473	YES	YES	YES	YES
chr17	47989800	47990799	YES	YES	YES	YES
chr17	83913450	83914449	YES	YES	YES	NO
chr18	35847550	35848549	YES	YES	YES	YES
chr18	38379600	38380599	YES	YES	YES	YES
chr18	55623850	55624849	YES	YES	YES	NO
chr18	60670100	60671099	YES	YES	YES	YES
chr18	78237350	78238649	YES	YES	NO	YES
chr18	78267250	78268249	YES	YES	YES	NO
chr19	14123550	14124549	YES	NO	YES	YES
chr19	14890224	14891223	YES	YES	YES	YES
chr19	59423500	59424499	YES	NO	YES	NO
chr19	60015624	60016623	YES	YES	YES	YES
chr2	128713224	128714223	YES	YES	YES	YES
chr2	4587500	4588499	YES	NO	YES	YES
chr2	59562350	59563349	YES	YES	YES	NO
chr2	59599574	59600573	YES	YES	YES	YES
chr2	137247824	137248823	YES	YES	YES	NO
chr3	5329374	5330373	YES	YES	YES	NO
chr3	30104950	30105949	YES	YES	YES	YES
chr3	51739124	51740123	YES	YES	YES	NO
chr3	99665550	99666549	YES	YES	YES	NO
chr3	101395074	101396073	YES	YES	YES	YES
chr4	13787600	13788599	YES	NO	YES	NO
chr4	58670350	58671349	YES	YES	YES	NO
chr4	82153224	82154223	YES	YES	YES	NO
chr4	95317574	95318573	YES	YES	YES	YES
chr4	98107750	98108749	YES	YES	YES	YES
chr4	98223124	98224123	YES	YES	YES	NO
chr4	105860850	105861849	YES	YES	YES	NO
chr4	106865450	106866449	YES	YES	YES	YES
chr4	106866024	106867023	YES	YES	YES	YES
chr4	108362550	108363799	YES	YES	YES	YES
chr4	139598774	139599773	YES	YES	YES	YES
chr4	154709400	154710399	YES	YES	YES	NO
chr4	154771374	154772373	YES	YES	YES	NO
chr4	154801974	154802973	YES	NO	YES	NO
chr5	16778274	16779273	YES	YES	NO	NO
chr5	37917650	37918649	YES	YES	YES	YES
chr5	37967124	37968123	YES	YES	YES	YES
chr5	77488050	77489049	YES	YES	YES	YES
chr5	92997150	92998349	YES	YES	YES	NO
chr5	102374150	102375149	YES	YES	YES	YES
chr5	111393650	111394649	YES	YES	YES	YES
chr5	131581274	131582273	YES	NO	YES	YES
chr5	136860924	136861923	YES	YES	YES	YES
chr5	143000624	143001623	YES	YES	YES	YES
chr6	4483850	4484849	YES	NO	YES	YES
chr6	50984024	50985023	YES	YES	YES	YES
chr6	51002400	51003399	YES	NO	YES	YES
chr6	51196124	51197123	YES	YES	YES	YES
chr6	52443050	52444049	YES	YES	YES	NO
chr6	52967374	52968373	YES	NO	YES	NO
chr6	53468774	53469773	YES	NO	YES	YES
chr6	72216500	72217499	YES	YES	YES	NO
chr6	72217950	72218949	YES	YES	YES	NO
chr6	72711200	72712199	YES	YES	YES	NO
chr6	84197400	84198399	YES	YES	YES	NO
chr6	143499400	143500399	YES	YES	YES	NO
chr7	82714950	82715949	YES	YES	YES	YES
chr7	83813650	83814649	YES	YES	YES	NO
chr7	98956900	98957899	YES	YES	YES	YES
chr7	108797174	108798173	YES	YES	YES	YES
chr7	112825950	112826949	YES	YES	YES	YES
chr7	123097550	123098549	YES	YES	YES	YES
chr7	130425724	130426723	YES	NO	YES	YES
chr7	142547674	142548673	YES	YES	YES	YES
chr7	142552400	142553749	YES	YES	YES	YES
chr7	142571300	142572299	YES	YES	YES	NO
chr7	145205850	145206849	YES	YES	YES	YES
chr8	25343050	25344049	YES	YES	YES	YES
chr8	25543050	25544049	YES	YES	YES	YES
chr8	26833050	26834049	YES	YES	YES	NO
chr8	56915700	56916699	YES	NO	YES	NO
chr8	84742100	84743749	YES	YES	YES	YES
chr8	87660674	87661673	YES	YES	YES	YES
chr8	90861624	90862623	YES	YES	YES	NO
chr8	91713624	91714623	YES	YES	YES	YES
chr8	108027500	108028649	YES	YES	YES	YES
chr8	120425074	120426073	YES	YES	YES	NO
chr8	125218474	125219473	YES	YES	YES	YES
chr8	126825974	126826973	YES	YES	YES	NO
chr9	43252650	43253649	YES	YES	YES	NO
chr9	37053774	37054773	YES	YES	YES	YES
chr9	40730274	40731273	YES	YES	YES	YES
chr9	41228600	41229599	YES	YES	YES	NO
chr9	41890050	41891099	YES	YES	YES	YES
chr9	41950150	41951149	YES	YES	YES	YES
chr9	61602274	61603273	YES	NO	YES	YES
chr9	63959750	63960749	YES	YES	YES	YES
chr9	72639750	72640749	YES	YES	YES	YES
chr9	88049200	88050199	YES	YES	YES	YES
chr9	106355824	106356823	YES	YES	YES	YES
