# Supplementary material for: GLI transcriptional repression regulates tissue-specific enhancer activity in response to Hedgehog signaling
Source: eLife. 2020 Jan 28;9:e50670. doi: 10.7554/eLife.50670 (PMC6986877; doi:10.7554/eLife.50670)
Supplement: Figure 6—source data 2. — H3K27ac called peaks with a FDR < 0.05 from two replicates of purmorphamine (‘pm’) treated or DMSO control NIH3T3 cells. For each peak, the assigned Peak ID, coordinates, peak type, fold change normalized to input for purmorphamine treated and control samples, and fold change of purmorphamine treated over control are listed. Additional tabs include sorted files for each peak type. [file elife-50670-fig6-data2.xlsx]

## Sheet: All 3T3 K27ac Peaks
Peak ID	Chromosome	Start	End	Type	pminput_FC	pminput_adjPval	ctrlinput_FC	ctrlinput_adjPval	pmctrl_FC	pmctrl_adjPval
200001	chr1	4784850	4786499	Stable	3.28637	3.28812e-05	3.81707	0.00041966	-0.25369	0.745129
200002	chr1	4807150	4808449	Stable	3.50031	1.93598e-05	3.9483	0.00041966	0.0686742	0.943125
200003	chr1	4856350	4859149	Stable	3.79771	1.73259e-05	4.06668	0.00041966	-0.196104	0.826777
200004	chr1	4859450	4859649	Stable	2.94512	0.000118108	2.39609	0.0118086	0.176582	0.862212
200005	chr1	5015100	5015299	other	0.929693	0.0921023	4.14958	0.00041966	-0.878673	0.174625
200006	chr1	5015950	5016099	Stable	1.19393	0.0374863	2.91962	0.00553152	-0.493328	0.487087
200007	chr1	5018350	5020099	Stable	3.59687	1.99428e-05	3.39181	0.000424782	-0.229605	0.784077
200008	chr1	5023250	5023649	Stable	2.86963	0.000106947	1.5361	0.0110241	0.551223	0.457998
200009	chr1	5070500	5070699	Stable	2.02579	0.000913839	1.73518	0.0144529	1.11846	0.0858734
200010	chr1	5082600	5083899	Stable	3.49073	2.02062e-05	3.91638	0.00041966	-0.161323	0.849875
200011	chr1	6213550	6215799	Stable	4.3415	1.55559e-05	4.35941	0.00041966	0.0800437	0.936245
200012	chr1	6272950	6273199	HH_dependent	2.09621	0.000702476	-0.505499	0.471738	2.53379	0.0179825
200013	chr1	6277100	6277249	other	2.29195	0.000477656	1.04677	0.101426	0.555888	0.531825
200014	chr1	6278150	6281699	Stable	3.7491	1.58593e-05	3.42932	0.000427118	0.424907	0.531611
200015	chr1	6281850	6282049	Stable	2.17747	0.00051998	1.654	0.0271989	0.90568	0.241198
200016	chr1	6282150	6282699	Stable	2.99232	4.36525e-05	1.90199	0.00528972	1.36846	0.0508095
200017	chr1	6283450	6283649	Stable	2.78029	0.000218239	2.38589	0.00209298	1.21434	0.0771724
200018	chr1	6285150	6285249	other	2.1211	0.000532034	1.08295	0.113815	1.43975	0.0662621
200019	chr1	6285500	6286299	Stable	3.12748	4.48895e-05	1.78489	0.00380073	1.068	0.116441
200020	chr1	6286750	6287099	Stable	2.7916	7.00604e-05	1.99324	0.00257245	1.13604	0.079927
200021	chr1	6287150	6287899	Stable	3.70333	7.53249e-05	2.70729	0.000626592	0.547584	0.402132
200022	chr1	6288100	6289649	Stable	3.47988	2.03292e-05	3.24812	0.000484184	0.159416	0.851412
200023	chr1	6289750	6289999	Stable	2.85035	0.00010722	1.66123	0.0133205	0.870063	0.219984
200024	chr1	6290100	6290999	Stable	2.59908	0.000144474	3.21708	0.000512597	-0.150341	0.86679
200025	chr1	6304700	6305549	Stable	3.03385	5.57714e-05	2.36881	0.00140702	0.690928	0.316199
200026	chr1	6305800	6306799	Stable	3.25272	2.99348e-05	2.52677	0.000886496	0.500998	0.45847
200027	chr1	6307100	6308549	HH_sensitive	3.46779	1.99859e-05	1.89593	0.00338366	1.39694	0.047074
200028	chr1	6309150	6309299	other	2.12229	0.00109369	0.869268	0.0608566	0.697076	0.274906
200029	chr1	6309650	6309799	other	2.2585	0.000714564	0.753314	0.533127	2.63449	0.0698059
200030	chr1	6311550	6311799	other	3.09159	0.000100064	1.01621	0.198639	1.18419	0.0713366
200031	chr1	6319750	6319999	HH_dependent	3.00957	6.99211e-05	0.133395	0.756116	2.23695	0.0147581
200032	chr1	6321650	6322649	HH_sensitive	3.33216	2.494e-05	1.0342	0.048905	2.85335	0.00448175
200033	chr1	6323100	6324399	HH_dependent	3.80457	1.56052e-05	0.992936	0.140621	2.43432	0.00802035
200034	chr1	6330400	6330549	other	1.94968	0.0014459	1.03331	0.18471	1.54946	0.115383
200035	chr1	6406700	6406949	Stable	2.58517	0.000160283	2.19748	0.00184098	0.31846	0.669384
200036	chr1	6453850	6453999	other	0.269636	0.628259	2.37191	0.00542695	-1.41123	0.0959964
200037	chr1	7087850	7088849	Stable	4.09825	1.56394e-05	4.27031	0.00041966	-0.00125618	0.999096
200038	chr1	7088950	7090899	Stable	3.84353	1.56394e-05	4.06241	0.00041966	-0.123995	0.887233
200039	chr1	7104300	7105199	Stable	3.27221	3.81594e-05	3.74446	0.00041966	-0.375282	0.612026
200040	chr1	7105300	7105949	Stable	2.76895	0.000160247	2.87555	0.000740113	0.159071	0.86921
200041	chr1	7206150	7206449	Stable	3.06985	6.77654e-05	1.83581	0.0042458	0.891275	0.206525
200042	chr1	7206550	7206649	Stable	1.96217	0.00134579	2.08313	0.00365725	0.577353	0.423805
200043	chr1	7206800	7207099	Stable	2.73773	0.00017924	2.23537	0.00967328	0.562875	0.558836
200044	chr1	7397100	7397949	Stable	2.99912	4.52777e-05	2.38815	0.00241203	0.578871	0.435113
200045	chr1	7398150	7398799	Stable	3.45596	8.03118e-05	3.84442	0.00041966	0.12213	0.918084
200046	chr1	9545500	9546949	Stable	2.86114	6.92368e-05	3.31661	0.000472678	-0.027104	0.97972
200047	chr1	9564250	9564349	other	0.264476	0.661611	2.21373	0.0025012	-1.26804	0.160591
200048	chr1	9565000	9565149	Stable	2.29902	0.000290182	2.14644	0.0118131	0.392349	0.597708
200049	chr1	9577000	9577349	other	0.589981	0.325857	3.18393	0.00197119	-1.58319	0.0987307
200050	chr1	9577700	9577949	Stable	1.29547	0.0187129	2.96534	0.000780314	-1.25936	0.0827083
200051	chr1	9578400	9579449	Stable	2.26244	0.000431045	3.09573	0.000578086	-0.293964	0.698788
200052	chr1	9627200	9627399	Stable	2.18372	0.00131344	1.45632	0.0222805	0.244173	0.798355
200053	chr1	9629450	9631799	Stable	3.14552	4.52534e-05	4.00937	0.00041966	-0.496259	0.500845
200054	chr1	9700550	9701349	Stable	3.43744	2.51574e-05	3.81435	0.00041966	-0.0223714	0.984625
200055	chr1	9747050	9747199	Stable	1.50871	0.00739372	2.9848	0.000785667	-0.551782	0.404297
200056	chr1	9747250	9748399	Stable	3.74795	1.78109e-05	3.24837	0.000641896	0.29543	0.724401
200057	chr1	9748700	9749099	Stable	3.17436	5.73714e-05	3.61037	0.000431908	0.343899	0.622049
200058	chr1	9942750	9944949	Stable	3.93154	1.56388e-05	4.33752	0.00041966	-0.190007	0.825927
200059	chr1	9945000	9945099	Stable	1.60706	0.00384378	2.86339	0.00136121	-0.316771	0.662321
200060	chr1	9982550	9983399	Stable	2.39419	0.000244768	2.8576	0.000639272	-0.801588	0.224578
200061	chr1	9984050	9984349	Stable	2.45994	0.000363172	2.90802	0.00160706	-1.03543	0.132904
200062	chr1	10036950	10039649	Stable	4.25221	1.55559e-05	4.78599	0.00041966	-0.18386	0.833036
200063	chr1	10039750	10040399	Stable	3.58751	1.93181e-05	3.4198	0.00054112	0.370213	0.651205
200064	chr1	10231800	10233899	Stable	4.23706	1.55559e-05	4.30025	0.00041966	0.40395	0.602412
200065	chr1	10592000	10592799	Stable	2.15011	0.000725839	3.38504	0.000549726	-0.971362	0.16035
200066	chr1	10592850	10593449	Stable	1.86801	0.00195666	3.3409	0.000488111	-1.1269	0.093129
200067	chr1	10699100	10699399	ctrlonly	0.988914	0.066409	3.13983	0.000533891	-1.98225	0.0204777
200068	chr1	10699550	10699849	Stable	2.20949	0.000680764	2.58955	0.00149629	-0.676221	0.342692
200069	chr1	10700100	10701099	common_ctrlhigh	1.82767	0.00186898	3.58367	0.00041966	-1.43514	0.0449459
200070	chr1	10701250	10701999	common_ctrlhigh	1.91595	0.00139248	3.00955	0.00066461	-1.85481	0.0201334
200071	chr1	10709600	10710299	Stable	2.93309	5.2668e-05	3.18913	0.000443908	-1.04674	0.0998965
200072	chr1	10717650	10717849	other	0.342781	0.55168	2.75644	0.0011857	-1.47331	0.0882714
200073	chr1	10718550	10720549	Stable	3.08874	3.88846e-05	3.81967	0.00041966	-0.635934	0.322435
200074	chr1	10720750	10720949	Stable	1.41467	0.0126638	2.74683	0.000966328	-0.835888	0.217102
200075	chr1	10722700	10722849	ctrlonly	0.617075	0.278455	2.07994	0.00344163	-2.19955	0.0308848
200076	chr1	10871800	10872299	Stable	2.59831	0.000113684	3.24669	0.00047953	-0.182317	0.819628
200077	chr1	10872450	10873249	Stable	3.04245	4.25902e-05	3.16407	0.000525044	-0.150209	0.85431
200078	chr1	10873300	10873499	Stable	1.92613	0.00257088	2.67382	0.000963438	-1.20498	0.0848437
200079	chr1	10877600	10878599	Stable	2.32636	0.00025597	3.09958	0.000460911	-0.151281	0.853347
200080	chr1	10878650	10878949	Stable	1.75839	0.00490958	3.45912	0.000434226	-0.835934	0.275611
200081	chr1	10879900	10880499	Stable	2.67787	0.000140858	3.39757	0.000530114	-0.143046	0.878185
200082	chr1	10881250	10881449	other	0.385965	0.461229	2.51302	0.00124527	-0.751268	0.254705
200083	chr1	10955650	10955899	Stable	2.48302	0.000237959	2.71771	0.000647584	-0.0830119	0.929632
200084	chr1	10955950	10956149	Stable	1.30445	0.0218359	3.24551	0.000456777	-1.01261	0.138048
200085	chr1	10993550	10993749	Stable	2.71166	9.21825e-05	2.02917	0.00209238	0.389202	0.576891
200086	chr1	10993800	10993899	Stable	2.05762	0.00180051	1.78201	0.0384866	0.785089	0.347257
200087	chr1	12692850	12692999	other	2.20456	0.000706848	1.23749	0.0602768	0.31712	0.667788
200088	chr1	12714550	12714749	other	0.980033	0.0570915	2.48729	0.0175576	-0.586398	0.533287
200089	chr1	12718400	12718599	Stable	1.73228	0.00305444	3.12015	0.000482409	-0.314149	0.683121
200090	chr1	12718850	12718949	Stable	1.72383	0.00246132	1.43557	0.0476036	0.502351	0.560152
200091	chr1	13371950	13374699	Stable	4.11477	1.55559e-05	4.33111	0.00041966	0.204868	0.828647
200092	chr1	13426700	13426949	Stable	1.81852	0.00196746	2.31631	0.00848977	0.553194	0.547764
200093	chr1	13531800	13532049	other	1.07317	0.0539427	3.60705	0.00041966	-1.22731	0.0750722
200094	chr1	13588600	13589949	Stable	4.37914	1.55559e-05	4.02322	0.00041966	0.0276509	0.980846
200095	chr1	13639150	13639349	Stable	1.20938	0.0364452	3.00551	0.000520285	-0.818704	0.288146
200096	chr1	13659300	13661049	Stable	3.83619	1.56566e-05	4.18011	0.00041966	0.0523049	0.958984
200097	chr1	14162000	14162099	other	1.07193	0.0643668	1.51933	0.00751693	-0.663606	0.409569
200098	chr1	14162300	14162799	Stable	2.9473	6.76924e-05	2.5134	0.00203434	0.402084	0.587644
200099	chr1	14163000	14163149	other	2.85728	0.00027114	0.630773	0.210707	1.56026	0.0788647
200100	chr1	14184300	14184599	Stable	2.3804	0.00021396	2.40477	0.000990588	0.493375	0.439242
200101	chr1	14184650	14184799	Stable	2.15754	0.000614109	2.32832	0.00315603	0.279153	0.708959
200102	chr1	14185350	14186249	Stable	3.44013	2.52159e-05	2.38556	0.00114146	0.477329	0.478384
200103	chr1	14186550	14186749	HH_sensitive	2.51756	0.000179675	1.51417	0.0118943	1.88978	0.0181198
200104	chr1	14273300	14275099	Stable	2.61576	0.000107785	3.04308	0.000477116	-0.249095	0.735552
200105	chr1	14304300	14304449	Stable	2.21237	0.000601838	1.63535	0.0307276	0.628445	0.43458
200106	chr1	14304550	14311049	Stable	4.32236	1.55559e-05	4.63364	0.00041966	-0.363047	0.598515
200107	chr1	14311100	14311249	Stable	2.85146	6.06475e-05	2.04555	0.00564962	0.195519	0.839882
200108	chr1	14312550	14312749	Stable	2.96695	4.74034e-05	2.37617	0.00689946	0.625352	0.351771
200109	chr1	14359500	14359999	Stable	2.76313	0.000190976	3.71853	0.000433757	-0.90042	0.234327
200110	chr1	14360350	14360699	Stable	2.65807	0.000107042	2.40954	0.0010249	-0.244916	0.744525
200111	chr1	14384600	14384849	HH_dependent	2.79826	0.000166644	0.418603	0.342383	1.9078	0.0216499
200112	chr1	14419150	14419499	HH_sensitive	3.09956	4.63577e-05	1.19149	0.0230205	2.9286	0.00429527
200113	chr1	14421850	14421949	HH_dependent	2.07194	0.00201098	-0.823702	0.295786	2.7934	0.0158564
200114	chr1	14422250	14422899	HH_dependent	3.11982	3.32283e-05	-1.84875	0.154712	4.60086	0.0158169
200115	chr1	14423900	14424099	HH_dependent	2.81565	7.30639e-05	0.404665	0.473947	2.99514	0.00660936
200116	chr1	14460600	14460799	HH_dependent	3.07928	3.66957e-05	0.422562	0.508444	2.747	0.0134435
200117	chr1	14464200	14464399	HH_dependent	1.99325	0.000955045	0.829559	0.138829	1.87789	0.0305505
200118	chr1	14464550	14464699	HH_dependent	2.87463	7.97851e-05	0.563399	0.189134	1.47797	0.0367843
200119	chr1	14465250	14465499	Stable	2.63963	0.000160139	2.58587	0.00154954	0.102938	0.914531
200120	chr1	14483900	14483999	other	1.13699	0.0328583	1.48935	0.101601	-0.371542	0.775425
200121	chr1	14484150	14484549	Stable	2.00949	0.000774407	2.56076	0.000759133	-0.691621	0.259807
200122	chr1	15805000	15805449	Stable	2.84355	0.000104173	3.30266	0.000504898	-0.172112	0.837252
200123	chr1	15805550	15806599	Stable	4.18755	1.55559e-05	4.31705	0.00041966	0.00168291	0.9988
200124	chr1	16103200	16107099	Stable	4.08703	1.55559e-05	4.1775	0.00041966	0.0335628	0.975466
200125	chr1	16108550	16108949	Stable	1.89174	0.00150215	3.01145	0.000550226	-0.673227	0.301281
200126	chr1	16113250	16113349	Stable	2.48239	0.000237959	1.31322	0.0184494	0.645671	0.30811
200127	chr1	16213050	16213649	Stable	2.66805	9.24389e-05	2.55008	0.000979865	-0.0181827	0.985612
200128	chr1	16216000	16216099	other	0.911643	0.0744451	2.21373	0.0025012	-0.531981	0.414186
200129	chr1	16225800	16225949	Stable	2.21585	0.00103157	2.86885	0.00350065	0.276842	0.747699
200130	chr1	16226550	16230149	Stable	3.36753	2.24855e-05	3.75707	0.00041966	-0.132073	0.877874
200131	chr1	16231500	16231599	Stable	2.34491	0.000301298	2.22342	0.00558822	-0.161216	0.857451
200132	chr1	16241500	16241849	Stable	1.69726	0.00325892	3.69378	0.00041966	-1.08981	0.104657
200133	chr1	16248250	16249149	Stable	3.21867	2.75563e-05	2.8743	0.00110756	0.11775	0.890153
200134	chr1	16249300	16250199	Stable	2.83748	7.03658e-05	2.53872	0.000857052	0.426891	0.537763
200135	chr1	16311850	16312449	Stable	2.25866	0.00046734	2.89147	0.00085407	-0.0760257	0.937062
200136	chr1	16312800	16313099	Stable	2.49476	0.000202734	2.30101	0.00132529	0.0901828	0.92084
200137	chr1	16313200	16313299	Stable	2.54445	0.000574459	2.14685	0.00405369	-1.18088	0.110779
200138	chr1	16519000	16520249	Stable	3.92703	1.67941e-05	3.33762	0.000770549	0.491705	0.574551
200139	chr1	16606650	16606849	Stable	1.91406	0.00382057	2.8285	0.00991164	-0.890803	0.176824
200140	chr1	16607050	16607499	Stable	1.40201	0.0123582	2.96122	0.00052996	-0.720035	0.246723
200141	chr1	16617450	16619399	Stable	4.43107	1.55559e-05	4.32024	0.00041966	0.0979279	0.924589
200142	chr1	16619450	16620149	Stable	3.42374	2.42794e-05	3.25932	0.000555	0.183074	0.820386
200143	chr1	16621350	16621649	common_ctrlhigh	1.77142	0.00659135	3.69054	0.000611773	-1.62834	0.0295456
200144	chr1	16626250	16626549	Stable	2.52661	0.00154803	2.56048	0.0007964	-0.694994	0.360459
200145	chr1	16626850	16627249	other	1.00751	0.0589257	3.35726	0.000573262	-0.983628	0.162354
200146	chr1	16656000	16658149	Stable	3.83909	1.63138e-05	3.72221	0.00041966	-0.00414157	0.996903
200147	chr1	16664800	16665899	Stable	3.97819	1.56052e-05	5.09393	0.00041966	-0.117817	0.907132
200148	chr1	16687400	16689699	Stable	3.83153	1.58593e-05	4.0688	0.00041966	-0.0941096	0.918863
200149	chr1	17097450	17097649	Stable	2.39207	0.000280017	1.95314	0.00468764	0.546037	0.451431
200150	chr1	17164500	17164649	other	2.75019	7.78878e-05	1.37954	0.0552334	1.03084	0.113156
200151	chr1	17311800	17311899	HH_dependent	1.95429	0.0028098	-1.50177	0.00703446	2.62846	0.0053373
200152	chr1	17450550	17450749	HH_dependent	2.33911	0.000362464	0.470366	0.283261	1.8416	0.0206786
200153	chr1	17451750	17451849	HH_dependent	2.26311	0.00114835	-1.72889	0.010159	3.71511	0.00364443
200154	chr1	17480050	17480499	Stable	2.2081	0.000400979	2.65353	0.00164631	0.569343	0.366249
200155	chr1	17480950	17481099	Stable	2.57813	0.00329653	2.03691	0.00335969	-0.705808	0.443741
200156	chr1	17481600	17482149	Stable	3.34257	3.85847e-05	2.41095	0.00220534	0.571458	0.476856
200157	chr1	17483350	17483499	Stable	3.17536	0.000471323	1.90274	0.0353891	0.671621	0.355397
200158	chr1	17487700	17487849	ctrlonly	0.577315	0.271868	2.33035	0.00359642	-1.35315	0.0498126
200159	chr1	17488400	17490599	Stable	2.65184	0.000118483	3.39318	0.000422747	-0.685139	0.264809
200160	chr1	17490650	17490749	Stable	1.78304	0.00255519	2.41083	0.00203003	-0.688535	0.357215
200161	chr1	17491050	17491249	ctrlonly	-0.119894	0.810099	3.48736	0.00179379	-1.88265	0.01944
200162	chr1	17491400	17491549	ctrlonly	0.857637	0.089277	2.32376	0.00204421	-1.53732	0.0409342
200163	chr1	17536700	17537999	Stable	3.69436	1.61853e-05	3.23486	0.000446826	0.523899	0.413873
200164	chr1	17538200	17539049	Stable	3.21167	2.75135e-05	3.21952	0.000464458	0.413971	0.527163
200165	chr1	17544550	17544799	other	2.25404	0.000453666	0.627677	0.41175	1.5868	0.103102
200166	chr1	17545150	17545299	other	2.55621	0.000193487	-0.135347	0.904632	2.19353	0.122943
200167	chr1	17552300	17552449	Stable	1.61271	0.0153772	3.34156	0.000637964	-0.332359	0.673707
200168	chr1	17553050	17553199	other	2.69573	0.000170642	0.499897	0.403481	1.24434	0.129968
200169	chr1	17567900	17568049	HH_dependent	2.47768	0.000195392	1.3745	0.0702078	2.20648	0.0108963
200170	chr1	17568900	17569099	other	2.15264	0.000460497	0.837712	0.0654938	1.24828	0.0611603
200171	chr1	17569300	17569549	Stable	3.32842	4.1806e-05	2.68078	0.0114562	0.596929	0.558722
200172	chr1	17569700	17570199	Stable	2.40817	0.000262013	3.11523	0.000610552	-0.10282	0.911278
200173	chr1	17570550	17570799	Stable	3.49388	2.28848e-05	2.03144	0.00453792	0.223662	0.794906
200174	chr1	17570850	17570999	Stable	1.62387	0.0102988	2.9788	0.00144773	-0.559833	0.486347
200175	chr1	17590450	17590749	HH_dependent	2.58985	0.000122556	1.07186	0.0844932	1.42441	0.0421791
200176	chr1	17593450	17594199	Stable	3.79926	1.58593e-05	3.21336	0.00153634	0.621199	0.31913
200177	chr1	17594700	17594799	Stable	1.81755	0.00320802	1.68115	0.00448615	0.654541	0.297729
200178	chr1	17594900	17595399	Stable	2.31029	0.000378463	2.59494	0.00079135	0.192122	0.819717
200179	chr1	17596000	17596349	Stable	2.47947	0.000159589	2.15949	0.00998306	0.95057	0.15867
200180	chr1	17598900	17599149	Stable	2.79625	0.000627745	1.29784	0.0479304	1.3708	0.0568228
200181	chr1	17599400	17601399	Stable	3.54715	2.37359e-05	3.25551	0.000444258	0.554738	0.380765
200182	chr1	17601450	17604649	Stable	3.37704	2.12882e-05	3.79606	0.00041966	0.203648	0.796197
200183	chr1	17604900	17605099	Stable	1.73511	0.00360967	2.82684	0.000603057	-1.34375	0.0620338
200184	chr1	17605300	17606449	Stable	2.92222	5.10661e-05	3.34092	0.000453137	-0.27294	0.710669
200185	chr1	17606500	17607999	Stable	2.79349	8.13369e-05	3.85087	0.00041966	-0.692921	0.267051
200186	chr1	17608900	17609199	Stable	2.01194	0.00139067	2.71195	0.00104373	-0.383979	0.590446
200187	chr1	17609300	17609449	other	0.647943	0.187006	3.54202	0.000971452	-0.868348	0.171751
200188	chr1	17628800	17628949	Stable	1.47393	0.0211863	1.75131	0.00418136	-0.618735	0.503135
200189	chr1	17629250	17629549	Stable	3.53868	2.71328e-05	3.8429	0.000909067	-0.588802	0.432964
200190	chr1	17629850	17630249	Stable	2.79446	6.66167e-05	3.61293	0.000787801	-0.265854	0.737012
200191	chr1	17637950	17638099	Stable	2.43629	0.000327862	1.28866	0.0345967	0.877214	0.176459
200192	chr1	17638250	17638499	Stable	2.04981	0.00118437	2.9703	0.000523114	-0.974868	0.159746
200193	chr1	17639750	17639949	Stable	1.49251	0.00673662	2.15684	0.00143935	-0.243799	0.744568
200194	chr1	17740750	17740849	HH_dependent	1.94478	0.00169857	-0.447586	0.420652	2.14672	0.0214832
200195	chr1	17741100	17741299	HH_sensitive	2.88865	0.00037032	1.10922	0.0454715	2.12342	0.0216069
200196	chr1	17742600	17742799	HH_dependent	1.98843	0.000877262	-0.171392	0.696267	2.60441	0.00499385
200197	chr1	20618750	20619349	Stable	1.80772	0.00232287	3.21303	0.000479396	-1.01965	0.145693
200198	chr1	20619800	20619999	Stable	1.47095	0.00942352	2.51221	0.000809248	-1.25317	0.0619959
200199	chr1	20674400	20674599	Stable	1.31357	0.0128825	2.69017	0.000751651	-0.589596	0.352851
200200	chr1	20674800	20674899	common_ctrlhigh	1.2106	0.0199817	1.95259	0.00418717	-1.36145	0.047074
200201	chr1	20677250	20677999	Stable	2.10733	0.000543442	3.71171	0.000552796	-1.26421	0.0608744
200202	chr1	20678600	20679849	Stable	2.33724	0.000393269	3.36499	0.000441979	-1.15506	0.104982
200203	chr1	20819700	20820199	Stable	3.196	7.16149e-05	3.49054	0.000421443	-0.401319	0.621918
200204	chr1	20820650	20821099	Stable	3.09905	7.58517e-05	2.4689	0.00380153	0.245902	0.767902
200205	chr1	20848350	20848649	Stable	2.21938	0.0005836	2.74156	0.00730638	-0.0326946	0.980124
200206	chr1	20870050	20870199	Stable	1.73279	0.00757419	1.73157	0.0309482	-0.291656	0.817494
200207	chr1	20870300	20870749	Stable	1.83658	0.00189245	2.90698	0.00122396	-0.883952	0.193139
200208	chr1	20877450	20877549	other	0.0972711	0.840112	2.00477	0.00732992	-1.12369	0.0868214
200209	chr1	20882850	20882949	other	0.609018	0.304421	2.59384	0.00139312	-1.06324	0.209669
200210	chr1	20890050	20890999	Stable	3.04566	4.86637e-05	3.72	0.00041966	-0.109543	0.904778
200211	chr1	20939050	20939149	Stable	2.68102	0.000450044	1.78508	0.0259273	0.156404	0.866612
200212	chr1	20939450	20939899	Stable	2.79301	7.56466e-05	2.22259	0.00281397	0.67299	0.291753
200213	chr1	20941050	20941149	HH_dependent	2.54212	0.000147132	-0.733427	0.114882	1.95711	0.0159242
200214	chr1	20941850	20942049	other	2.89197	5.36102e-05	0.923724	0.0504548	1.23156	0.0624873
200215	chr1	20950700	20951499	Stable	3.4123	2.6567e-05	3.36911	0.000422747	-0.00281027	0.997845
200216	chr1	20951700	20952299	Stable	3.5503	3.53962e-05	3.11916	0.000740515	0.390105	0.66071
200217	chr1	20997300	20999399	Stable	3.65643	1.67435e-05	2.98198	0.000674589	0.132954	0.886386
200218	chr1	20999650	20999749	Stable	1.87146	0.0022304	2.89115	0.000615242	-0.31898	0.705569
200219	chr1	21001700	21002299	Stable	2.89843	5.9623e-05	1.70929	0.0185578	1.26245	0.124173
200220	chr1	21002450	21003249	Stable	3.12309	5.43892e-05	2.95004	0.00113208	0.727307	0.342898
200221	chr1	21006000	21012049	Stable	3.92106	1.55559e-05	3.79077	0.00041966	0.155554	0.863779
200222	chr1	21012300	21016449	Stable	3.99358	1.55559e-05	3.84537	0.00041966	0.624033	0.347414
200223	chr1	21025700	21026149	HH_dependent	2.59675	0.000354075	0.887094	0.103774	2.06947	0.0146445
200224	chr1	21028000	21028699	other	3.44667	1.95266e-05	1.57782	0.059531	1.92807	0.0577218
200225	chr1	21037750	21038099	Stable	2.7217	0.000168125	2.77001	0.00508819	0.0966954	0.911764
200226	chr1	21038900	21039049	Stable	2.07471	0.000632491	2.96837	0.00183979	-0.578548	0.374813
200227	chr1	21039150	21039449	Stable	2.15189	0.000525391	2.6569	0.000890383	-0.350576	0.605632
200228	chr1	21039500	21039799	Stable	3.1878	3.00249e-05	1.9876	0.0260056	0.730305	0.4521
200229	chr1	21040050	21043349	Stable	3.54399	1.95324e-05	3.62097	0.00041966	-0.149965	0.866742
200230	chr1	21049650	21049749	Stable	1.7958	0.0019103	1.66137	0.00841152	0.0632339	0.94783
200231	chr1	21051750	21053549	Stable	3.71707	1.64873e-05	3.83911	0.00041966	0.177149	0.841524
200232	chr1	21053700	21054149	Stable	2.43855	0.000190741	3.41501	0.000711326	0.0150466	0.988231
200233	chr1	21075250	21077799	Stable	3.51757	1.86789e-05	3.06681	0.000483413	0.593724	0.357963
200234	chr1	21077900	21079249	Stable	3.92499	1.56805e-05	4.37517	0.00041966	0.16484	0.855866
200235	chr1	21079350	21080299	Stable	4.58347	1.55559e-05	4.2054	0.000450822	0.0998141	0.917295
200236	chr1	21089750	21090349	Stable	2.55228	0.000180564	2.24431	0.00119805	0.450952	0.525251
200237	chr1	21090550	21090649	Stable	2.79138	9.81898e-05	2.21373	0.0025012	0.5039	0.475936
200238	chr1	21147250	21147399	other	3.63386	2.43904e-05	-0.825763	0.430434	2.14863	0.109521
200239	chr1	21161300	21161449	HH_dependent	2.67186	0.000106756	1.04677	0.101426	1.89595	0.0355411
200240	chr1	21218500	21219349	Stable	3.9895	1.84561e-05	3.8303	0.00041966	-0.0276423	0.980129
200241	chr1	23189850	23190149	Stable	2.18757	0.000776859	2.40211	0.00143241	-0.856244	0.18405
200242	chr1	23191100	23191349	Stable	1.35281	0.0242519	3.18005	0.000770474	-0.524544	0.427348
200243	chr1	23202250	23203799	Stable	2.9461	5.0618e-05	3.69222	0.00041966	-0.583406	0.35498
200244	chr1	23213200	23213349	ctrlonly	-0.409095	0.397651	3.16382	0.00045574	-2.22583	0.00901496
200245	chr1	23213700	23214649	Stable	2.39737	0.000238447	3.3396	0.000631855	-0.500592	0.496552
200246	chr1	23214700	23215649	Stable	2.20592	0.000599245	3.89143	0.00041966	-1.10839	0.109657
200247	chr1	23255550	23255999	Stable	2.78647	9.36282e-05	3.18718	0.000644716	-0.257078	0.753991
200248	chr1	23256300	23257249	Stable	2.9746	6.83841e-05	3.19251	0.000536382	0.104607	0.918215
200249	chr1	23382450	23383199	Stable	3.71349	1.77676e-05	3.83704	0.000442937	0.421807	0.598381
200250	chr1	23383450	23384049	Stable	3.56222	1.70426e-05	4.3131	0.000438207	-0.176418	0.82439
200251	chr1	23399500	23399849	Stable	2.84106	7.88677e-05	1.93548	0.0062895	0.485164	0.547398
200252	chr1	23399900	23400049	Stable	1.43927	0.0249062	2.30973	0.00242684	-1.27321	0.144586
200253	chr1	23921600	23922799	Stable	4.01978	1.57064e-05	3.73732	0.000458506	0.653134	0.405062
200254	chr1	23922850	23922999	Stable	3.35286	3.93692e-05	1.75422	0.0232933	0.583444	0.426582
200255	chr1	23935250	23935349	other	2.21449	0.000944383	0.84837	0.351259	0.638802	0.415114
200256	chr1	23955550	23955649	other	0.289613	0.588038	1.97682	0.00923331	-1.25409	0.16291
200257	chr1	24004800	24006199	Stable	3.24299	2.75479e-05	3.77298	0.00041966	-0.274296	0.709788
200258	chr1	24099300	24100349	Stable	4.05218	1.56388e-05	4.13408	0.00041966	0.2816	0.74191
200259	chr1	24100500	24101099	Stable	4.05271	1.55559e-05	3.87206	0.000422791	-0.0615367	0.949097
200260	chr1	24107600	24107749	other	0.608043	0.269657	2.98103	0.00122356	-1.4106	0.0648926
200261	chr1	24553900	24553999	other	0.919044	0.0838784	2.48445	0.00254257	-1.04542	0.159983
200262	chr1	24677800	24679199	Stable	4.0662	1.55559e-05	4.40409	0.00041966	0.0569825	0.958366
200263	chr1	24679350	24679499	other	2.94431	6.44777e-05	1.01087	0.052971	0.899252	0.147341
200264	chr1	30778600	30778749	Stable	2.59329	0.000429115	2.47486	0.00187605	0.618167	0.349813
200265	chr1	30872450	30875299	Stable	4.16991	1.55559e-05	4.23673	0.00041966	0.295731	0.711237
200266	chr1	30875350	30875449	Stable	2.01653	0.000812247	2.71334	0.00849574	-0.30612	0.789892
200267	chr1	30948650	30951049	Stable	3.98601	1.56052e-05	4.43657	0.00041966	0.00119547	0.999107
200268	chr1	33529450	33530099	Stable	3.18912	3.99229e-05	2.67191	0.00293593	0.159234	0.889216
200269	chr1	33530250	33530549	Stable	2.91529	7.29242e-05	2.00846	0.00232768	0.0913731	0.927645
200270	chr1	33657200	33658499	Stable	3.7659	1.58959e-05	4.30693	0.00041966	-0.219288	0.785698
200271	chr1	33658550	33658749	Stable	1.76424	0.00270804	3.13625	0.000461961	-1.22381	0.0810853
200272	chr1	33669400	33669699	Stable	2.15778	0.00275608	2.89119	0.000639234	-0.474164	0.49598
200273	chr1	33669850	33670999	Stable	3.17089	5.28303e-05	3.59357	0.000454882	-0.458095	0.529479
200274	chr1	33671300	33671749	common_ctrlhigh	1.17874	0.0250875	3.58199	0.000453945	-1.68736	0.025366
200275	chr1	33671800	33671949	Stable	2.24063	0.00143899	2.4351	0.00733375	-1.59729	0.06141
200276	chr1	33672200	33675349	Stable	3.33433	3.2967e-05	4.06693	0.00041966	-1.00757	0.143996
200277	chr1	33683100	33683299	ctrlonly	0.674935	0.169019	2.19496	0.00258197	-1.5197	0.0440345
200278	chr1	33687700	33687899	ctrlonly	0.296525	0.579444	2.18806	0.00191802	-1.99145	0.0296919
200279	chr1	33688050	33688249	Stable	1.51201	0.010678	3.24413	0.000992174	-1.46357	0.0629669
200280	chr1	33688450	33689599	Stable	1.96908	0.0010601	3.65265	0.00115647	-1.10615	0.0958817
200281	chr1	33689750	33690699	Stable	2.45924	0.000296259	3.66675	0.00041966	-0.917628	0.202551
200282	chr1	33691050	33691349	ctrlonly	0.423378	0.457792	2.65277	0.00251341	-1.89868	0.0340757
200283	chr1	33691850	33692249	Stable	1.58613	0.00647944	2.74158	0.000698906	-1.22428	0.0719298
200284	chr1	33696250	33697949	Stable	3.07708	4.35507e-05	3.66248	0.00041966	-0.846985	0.193191
200285	chr1	33719400	33721299	Stable	3.58635	2.08557e-05	4.32608	0.00041966	-0.433673	0.569359
200286	chr1	33724150	33724499	Stable	2.24332	0.000458365	2.35561	0.00139926	-0.646887	0.321255
200287	chr1	33725050	33725149	other	1.28992	0.0695476	1.92197	0.0545043	-0.166459	0.920995
200288	chr1	33755900	33758399	Stable	3.52103	2.2177e-05	3.96754	0.00041966	-0.110232	0.908602
200289	chr1	33792950	33793049	Stable	1.62231	0.00756398	1.12799	0.0341533	-0.460037	0.528692
200290	chr1	33807850	33808049	Stable	1.83745	0.00159704	3.31455	0.00120971	0.105332	0.905807
200291	chr1	33813250	33815199	Stable	3.73799	1.74641e-05	4.07832	0.00041966	-0.188364	0.833651
200292	chr1	33883200	33883799	Stable	2.09028	0.000597699	3.00464	0.000522362	-0.206002	0.795851
200293	chr1	33899700	33900199	Stable	2.13579	0.00101707	3.21726	0.000544855	-0.76408	0.30933
200294	chr1	33907000	33907099	Stable	1.0252	0.0461858	2.53303	0.000898467	-0.192996	0.806515
200295	chr1	33907200	33909049	Stable	3.54767	2.21625e-05	3.70725	0.000475319	0.176845	0.851983
200296	chr1	33965050	33965299	Stable	1.46191	0.00727502	2.25262	0.0016574	-1.11147	0.0970538
200297	chr1	34004900	34008099	Stable	3.20969	2.80705e-05	3.78391	0.00041966	-0.106704	0.903241
200298	chr1	34011100	34012899	Stable	4.01963	1.55559e-05	3.48116	0.000544135	0.203562	0.808481
200299	chr1	34013100	34013649	Stable	2.05916	0.00109715	2.89011	0.000842571	-0.164529	0.860787
200300	chr1	34033150	34033299	other	0.621878	0.244776	2.66029	0.000683112	-0.431689	0.575943
200301	chr1	34034750	34035199	Stable	3.09687	4.95132e-05	1.6399	0.0148354	1.21045	0.112636
200302	chr1	34035900	34036049	other	2.50101	0.00398148	0.293719	0.596748	1.14395	0.176011
200303	chr1	34040400	34040499	other	3.15207	7.4327e-05	1.50545	0.0543596	1.1673	0.118091
200304	chr1	34040900	34041999	Stable	3.32005	2.32627e-05	2.3946	0.00124349	0.922189	0.153641
200305	chr1	34042100	34042899	Stable	2.92561	0.000118708	3.16927	0.000475657	0.178362	0.831753
200306	chr1	34043050	34046349	Stable	3.67682	1.71481e-05	3.82057	0.00041966	-0.057834	0.951322
200307	chr1	34060200	34060549	Stable	3.53806	8.70083e-05	1.67329	0.00421871	0.588152	0.346466
200308	chr1	34061050	34061149	other	1.4398	0.0156751	1.13986	0.0958604	0.646726	0.380372
200309	chr1	34109000	34109099	Stable	1.51788	0.0248458	2.96606	0.00137706	-0.977599	0.158256
200310	chr1	34109200	34109349	Stable	1.46766	0.00716005	2.58125	0.00728214	-1.10846	0.177551
200311	chr1	34109450	34109949	Stable	2.80386	9.42767e-05	2.51943	0.00130944	-0.0602261	0.950438
200312	chr1	34110050	34110799	Stable	2.6716	0.000102714	3.14021	0.00132429	-0.115619	0.906862
200313	chr1	34110950	34112099	Stable	3.09857	3.60559e-05	2.55762	0.00159294	0.42143	0.565538
200314	chr1	34112300	34112449	Stable	2.34973	0.000421203	1.72152	0.00486143	0.582224	0.41958
200315	chr1	34112900	34113199	Stable	3.19089	3.19097e-05	1.87824	0.0148113	0.147283	0.888319
200316	chr1	34118150	34118349	Stable	1.70478	0.00351082	2.18038	0.00210688	-0.626862	0.352851
200317	chr1	34118550	34118649	other	0.394925	0.474906	2.3758	0.00637616	-0.408294	0.575029
200318	chr1	34120600	34120699	other	1.00718	0.217743	2.13917	0.00363076	-0.683608	0.607731
200319	chr1	34121050	34121949	Stable	2.21832	0.000631792	3.2766	0.000942598	-0.567734	0.382364
200320	chr1	34123250	34123399	Stable	1.62231	0.00756398	2.25437	0.00228907	-1.14512	0.110142
200321	chr1	34125850	34126149	ctrlonly	0.301257	0.523367	3.25664	0.000826098	-1.98228	0.0160677
200322	chr1	34126650	34127199	Stable	3.56977	2.52585e-05	3.40247	0.000937132	-1.02789	0.183278
200323	chr1	34127450	34128849	Stable	3.15904	7.37332e-05	3.26899	0.000478108	-0.466622	0.540591
200324	chr1	34138850	34140099	Stable	2.49914	0.000152701	4.01696	0.00041966	-0.981594	0.117992
200325	chr1	34140350	34141099	Stable	2.07353	0.000754397	2.94262	0.000861148	-0.86192	0.21123
200326	chr1	34141500	34141599	Stable	1.5989	0.00840494	2.42327	0.00920878	-0.214103	0.804709
200327	chr1	34150000	34150949	common_ctrlhigh	3.16779	3.7555e-05	3.59367	0.00041966	-1.39502	0.0457742
200328	chr1	34151000	34151499	Stable	2.16615	0.000445594	3.41859	0.000602107	-1.19953	0.082069
200329	chr1	34151700	34151799	other	0.199028	0.82509	1.53107	0.0253962	-0.938678	0.566257
200330	chr1	34154650	34154749	other	-0.729296	0.265909	1.68958	0.0086802	-2.07593	0.0667892
200331	chr1	34154850	34155099	ctrlonly	0.465651	0.467088	3.2641	0.000520092	-2.69617	0.0202311
200332	chr1	34155500	34155649	other	-0.0384627	0.966812	3.03359	0.0138681	-2.50132	0.112014
200333	chr1	34185500	34185749	Stable	1.58167	0.00530931	2.82293	0.000810885	-0.70446	0.301478
200334	chr1	34236150	34237249	Stable	2.50537	0.000234839	3.06737	0.000480652	-0.613137	0.323952
200335	chr1	34254350	34254549	Stable	2.53956	0.000315903	2.01113	0.00661084	0.272644	0.739947
200336	chr1	34432450	34436049	Stable	3.76591	1.66256e-05	4.16394	0.00041966	-0.106629	0.90927
200337	chr1	34439000	34439199	Stable	2.36673	0.000707163	3.25694	0.00675837	0.254575	0.807118
200338	chr1	34439450	34439799	Stable	3.11517	7.20099e-05	3.14463	0.00136035	0.160173	0.882458
200339	chr1	34439950	34440449	Stable	3.09772	5.25853e-05	2.89903	0.000675953	-0.130701	0.886919
200340	chr1	34801750	34802349	Stable	2.70641	9.30996e-05	2.60116	0.00107337	0.184052	0.821388
200341	chr1	34841700	34842749	Stable	3.95081	1.62531e-05	4.55464	0.00041966	-0.135842	0.883899
200342	chr1	34842800	34844099	Stable	4.49171	1.55559e-05	4.80703	0.00041966	0.137093	0.883076
200343	chr1	34849300	34850249	Stable	3.31879	3.40558e-05	4.12384	0.00041966	0.103908	0.918902
200344	chr1	34850350	34851049	Stable	3.15767	5.26921e-05	3.00756	0.00053303	0.128975	0.896067
200345	chr1	34851100	34851699	Stable	3.50547	2.7523e-05	3.70078	0.000667742	-0.0890846	0.929346
200346	chr1	34851750	34852499	Stable	2.71969	0.00012576	3.20648	0.000473022	-0.173904	0.846532
200347	chr1	34852850	34852999	Stable	2.45396	0.000282584	2.82808	0.000763231	0.0590059	0.956862
200348	chr1	35968900	35969049	Stable	1.61599	0.00623913	3.16903	0.000808216	-0.0954296	0.931369
200349	chr1	35969250	35969449	common_ctrlhigh	1.05152	0.0397737	2.75779	0.00328683	-1.37377	0.0467053
200350	chr1	35992900	35993149	other	2.90227	0.000666372	1.17071	0.222943	1.2544	0.32052
200351	chr1	35993250	35993399	Stable	2.73991	0.000640987	1.97108	0.00343878	0.966822	0.169858
200352	chr1	36015750	36015899	Stable	3.10852	6.4508e-05	2.18836	0.00143362	0.92111	0.149947
200353	chr1	36016550	36017149	Stable	3.12686	5.3321e-05	2.98882	0.00149537	0.404026	0.62069
200354	chr1	36017250	36019249	Stable	3.58663	2.00772e-05	3.50709	0.000530253	0.471067	0.529244
200355	chr1	36019800	36019949	other	2.98946	0.000495543	0.798607	0.1095	0.291231	0.818427
200356	chr1	36021300	36021399	other	2.93349	6.44259e-05	1.19089	0.10516	0.904944	0.180946
200357	chr1	36029350	36029599	Stable	2.27429	0.000584259	2.88614	0.000648706	-0.551418	0.394455
200358	chr1	36029650	36030549	Stable	3.54936	1.99395e-05	3.02631	0.00198039	0.303844	0.702267
200359	chr1	36030700	36031449	Stable	3.25229	3.22149e-05	3.5246	0.000443428	0.0567984	0.957017
200360	chr1	36059550	36059649	other	0.298966	0.606709	1.74279	0.0203128	-1.01807	0.279266
200361	chr1	36059950	36061199	Stable	2.50091	0.000193098	3.58356	0.000425502	-0.255639	0.75692
200362	chr1	36061850	36062049	Stable	1.98091	0.004629	2.55923	0.00294799	-0.300928	0.747522
200363	chr1	36062150	36062399	Stable	2.62357	0.000190808	2.7554	0.00164761	-0.104588	0.923991
200364	chr1	36062600	36062749	Stable	2.44091	0.001411	1.55292	0.0364842	0.597327	0.498027
200365	chr1	36063650	36063899	Stable	2.29794	0.000781959	3.00823	0.000664786	0.954439	0.157549
200366	chr1	36064200	36065049	Stable	3.72107	1.64235e-05	2.93019	0.000681085	0.529457	0.458769
200367	chr1	36065200	36065949	Stable	3.52648	1.75743e-05	1.98326	0.00346101	0.255797	0.748071
200368	chr1	36067500	36067649	Stable	2.84368	8.51024e-05	2.01524	0.00218274	0.513893	0.433206
200369	chr1	36067750	36069699	Stable	3.40751	2.45429e-05	3.34441	0.000790114	0.343061	0.645655
200370	chr1	36070500	36070649	Stable	1.78716	0.00256973	2.05319	0.00454756	0.415178	0.560335
200371	chr1	36087200	36090949	Stable	3.41868	2.19754e-05	2.793	0.000630552	1.02129	0.121119
200372	chr1	36091200	36091299	HH_dependent	1.30127	0.0138462	-0.915265	0.165297	2.15955	0.02811
200373	chr1	36095000	36096199	Stable	3.12556	5.71092e-05	2.38064	0.00227183	0.864014	0.169653
200374	chr1	36115700	36116649	Stable	2.20957	0.000406134	3.46685	0.00041966	-0.715037	0.252548
200375	chr1	36116800	36117549	Stable	2.45541	0.000200922	3.69502	0.000436891	-1.19084	0.0721621
200376	chr1	36117800	36117949	Stable	1.33898	0.012901	2.76699	0.00275637	-0.988069	0.143822
200377	chr1	36118200	36118599	Stable	2.11274	0.000555957	2.784	0.000653947	-0.731221	0.249213
200378	chr1	36236250	36236549	Stable	1.36964	0.0129265	3.16807	0.000516386	-1.06331	0.11904
200379	chr1	36243600	36244399	Stable	3.33637	2.60639e-05	3.80371	0.00041966	-0.139465	0.874517
200380	chr1	36244450	36245399	Stable	3.15758	4.10496e-05	3.52337	0.00041966	-0.38855	0.601145
200381	chr1	36307300	36307499	Stable	2.54267	0.000149799	1.73388	0.0087173	0.521602	0.48138
200382	chr1	36307750	36308499	Stable	2.925	7.51891e-05	2.75006	0.00155114	0.0325085	0.975699
200383	chr1	36326500	36326849	Stable	2.50487	0.000282677	3.06823	0.000525318	-0.878695	0.21302
200384	chr1	36368350	36369149	Stable	3.88366	1.7957e-05	4.05152	0.00041966	0.178069	0.847309
200385	chr1	36432800	36432999	ctrlonly	0.373573	0.479423	2.59489	0.000729133	-1.37549	0.0462797
200386	chr1	36444600	36445349	Stable	3.0078	5.24182e-05	3.37264	0.000455779	0.357776	0.646062
200387	chr1	36445500	36446049	Stable	2.84853	7.02658e-05	2.91932	0.000535454	0.29151	0.69624
200388	chr1	36456850	36457499	Stable	2.97066	4.85204e-05	3.032	0.00202331	0.46361	0.597347
200389	chr1	36457550	36458349	Stable	3.35701	2.7418e-05	2.59524	0.00113186	0.413233	0.558644
200390	chr1	36470850	36471549	Stable	4.02233	1.55559e-05	4.34065	0.00041966	0.211466	0.805029
200391	chr1	36471750	36472549	Stable	3.45288	2.57983e-05	2.92041	0.000779774	0.228543	0.777214
200392	chr1	36475500	36476049	Stable	2.87056	6.96104e-05	2.55893	0.000905399	0.43845	0.523616
200393	chr1	36476400	36476499	Stable	1.55836	0.00730729	1.26348	0.0379413	0.606131	0.417684
200394	chr1	36511850	36512299	Stable	4.47792	1.55559e-05	3.37713	0.00186077	0.6244	0.468566
200395	chr1	36546350	36547199	Stable	3.52146	2.02678e-05	3.54062	0.00041966	0.240236	0.762866
200396	chr1	36547450	36548099	Stable	3.44986	5.91416e-05	2.23921	0.00246359	0.841328	0.300069
200397	chr1	36548300	36548699	Stable	3.84168	1.68557e-05	1.75447	0.00366593	1.41638	0.0602366
200398	chr1	36555250	36558399	Stable	4.24858	1.55559e-05	4.43811	0.00041966	-0.0279531	0.98021
200399	chr1	36558950	36559099	other	1.95551	0.00157494	0.176013	0.775392	1.36565	0.115261
200400	chr1	36563600	36564099	Stable	2.39797	0.000260073	2.26163	0.00115622	0.151962	0.853009
200401	chr1	36564450	36564999	other	3.29893	2.77424e-05	1.10865	0.0751889	1.09989	0.149633
200402	chr1	36566000	36566399	Stable	2.29198	0.000312538	2.74729	0.00187828	0.176725	0.835937
200403	chr1	36568550	36568799	Stable	2.39202	0.000330467	2.69429	0.000785667	0.111343	0.903605
200404	chr1	36569200	36569349	Stable	1.38997	0.0241948	2.73381	0.00161962	-0.422721	0.613051
200405	chr1	36569500	36569999	Stable	2.89839	7.32464e-05	2.23419	0.00295595	0.355982	0.625845
200406	chr1	36580000	36581299	Stable	3.25086	3.52377e-05	2.96711	0.00115394	0.428304	0.554045
200407	chr1	36583400	36583499	Stable	1.98199	0.00100071	1.34719	0.0196984	1.0242	0.105614
200408	chr1	36583800	36583949	HH_dependent	3.2609	2.74793e-05	-0.145098	0.800321	2.27403	0.0177536
200409	chr1	36586650	36586799	HH_sensitive	2.47441	0.000437212	1.24658	0.015544	1.92263	0.0148263
200410	chr1	36587200	36587449	HH_dependent	2.25025	0.000382883	0.542447	0.337121	2.10316	0.0200267
200411	chr1	36587550	36587699	Stable	1.8705	0.00244011	1.57368	0.0177389	0.827938	0.273165
200412	chr1	36587750	36590699	HH_sensitive	3.46518	2.35321e-05	1.46763	0.0193576	2.18222	0.0161497
200413	chr1	36603300	36603499	other	2.29673	0.000293394	1.28215	0.0648551	1.21614	0.14346
200414	chr1	36603800	36603899	Stable	1.66906	0.00305405	2.31009	0.00128749	0.432693	0.513337
200415	chr1	36604000	36604099	Stable	3.52616	3.10256e-05	1.07938	0.0387357	1.08332	0.120822
200416	chr1	36690850	36691399	Stable	3.61343	1.73319e-05	3.23184	0.000483356	0.310876	0.685075
200417	chr1	36691500	36692349	Stable	3.68134	1.89198e-05	4.06924	0.000420469	-0.0439592	0.968466
200418	chr1	36708900	36710049	Stable	3.25272	2.90113e-05	4.14752	0.00041966	-0.163908	0.853457
200419	chr1	36710150	36710599	Stable	3.23033	3.16959e-05	3.34565	0.000493059	-0.0729425	0.940781
200420	chr1	36929600	36929799	HH_dependent	1.70774	0.00338751	-0.813242	0.0862535	3.21328	0.00258955
200421	chr1	36931400	36931599	HH_dependent	2.56785	0.000163638	-0.774802	0.21105	3.57383	0.00378554
200422	chr1	36931900	36932349	HH_dependent	2.87319	7.39033e-05	-1.42437	0.0232666	4.15751	0.00213667
200423	chr1	36936850	36936949	other	2.49532	0.000877458	1.48044	0.101023	0.834673	0.274652
200424	chr1	36937250	36937399	Stable	2.19476	0.000590517	1.71009	0.0159873	-0.0133577	0.991285
200425	chr1	36937600	36937799	Stable	2.35368	0.000291381	2.79655	0.000839921	-0.363036	0.603673
200426	chr1	36938100	36938249	HH_dependent	3.14832	0.00035039	0.167946	0.797276	2.67609	0.0114791
200427	chr1	36938500	36940499	Stable	4.54145	1.55559e-05	4.27605	0.00041966	0.204158	0.820803
200428	chr1	37299650	37299749	Stable	1.36492	0.0123456	2.46014	0.00139335	-1.40224	0.0592339
200429	chr1	37299850	37300499	Stable	3.61825	2.71908e-05	3.28748	0.000766724	0.311462	0.717567
200430	chr1	37429250	37430949	Stable	3.60337	2.13971e-05	3.496	0.000526907	0.163597	0.86675
200431	chr1	37864350	37864899	Stable	3.2759	3.23604e-05	3.31427	0.000461234	0.381499	0.619166
200432	chr1	37865350	37866349	Stable	3.22408	3.1612e-05	4.0271	0.000544006	0.0306238	0.975913
200433	chr1	37866500	37866649	Stable	2.33364	0.000498972	2.6938	0.00851946	0.0969214	0.911307
200434	chr1	37870700	37870949	Stable	1.18712	0.0260743	3.40044	0.0131326	-0.710415	0.277788
200435	chr1	37871150	37872249	Stable	2.94885	6.76239e-05	3.71676	0.00044303	-0.247045	0.765865
200436	chr1	37872350	37873399	Stable	2.94445	7.32438e-05	3.73616	0.00041966	-0.497246	0.496552
200437	chr1	37889750	37890399	Stable	3.05841	4.20442e-05	2.99219	0.000521838	-0.0220856	0.983134
200438	chr1	37890500	37891049	Stable	2.68643	0.000103569	3.4348	0.000422791	-0.479753	0.471556
200439	chr1	37972150	37972299	Stable	3.22807	0.000149175	2.30204	0.0019361	0.0807266	0.938234
200440	chr1	37996350	37998999	Stable	4.04145	1.55559e-05	3.99729	0.00041966	-0.0376957	0.970953
200441	chr1	38038250	38038399	Stable	1.30507	0.0212354	2.28065	0.00219162	-0.928471	0.201961
200442	chr1	38038750	38038999	common_ctrlhigh	1.26377	0.0256678	2.48948	0.0010344	-2.35533	0.0118211
200443	chr1	38039250	38039899	common_ctrlhigh	1.69572	0.00327744	3.38887	0.000436891	-1.46928	0.0361549
200444	chr1	38081050	38081349	Stable	1.59729	0.00624039	2.17628	0.00330903	-0.784654	0.262483
200445	chr1	38081700	38081949	ctrlonly	0.972328	0.0799594	3.22075	0.000869485	-1.70598	0.0321368
200446	chr1	38128650	38129749	Stable	4.48429	1.55559e-05	4.35844	0.00043868	0.836348	0.290135
200447	chr1	38129850	38131199	Stable	4.35552	1.55559e-05	3.16347	0.000467626	0.342764	0.638567
200448	chr1	38185900	38186149	HH_dependent	3.26468	2.54615e-05	0.0544799	0.900119	2.20426	0.0107526
200449	chr1	38186600	38186799	other	2.56667	0.000463849	0.676369	0.228377	1.68013	0.0822578
200450	chr1	38202350	38202849	Stable	3.29381	4.4318e-05	1.283	0.0199519	1.14309	0.0967633
200451	chr1	38203150	38203549	Stable	2.92393	5.38219e-05	2.21191	0.00150685	0.975021	0.13703
200452	chr1	38212950	38213299	Stable	3.01059	4.59152e-05	1.75447	0.00366593	1.18816	0.0723098
200453	chr1	38213350	38213549	HH_dependent	2.74661	0.000132767	1.32298	0.0578941	2.09882	0.018415
200454	chr1	38220600	38221149	HH_dependent	3.60023	1.92006e-05	0.818348	0.172304	1.97239	0.0296561
200455	chr1	38221300	38221749	Stable	2.77606	7.26256e-05	2.45172	0.000946866	0.431187	0.519217
200456	chr1	38229650	38229749	other	2.6016	0.000195135	1.72455	0.0875769	0.118248	0.917507
200457	chr1	38240750	38241199	Stable	1.91785	0.00121051	2.89958	0.00101383	-0.154416	0.862635
200458	chr1	38241250	38241599	Stable	3.34302	5.42558e-05	2.1914	0.00328474	0.786743	0.203665
200459	chr1	38241850	38242299	Stable	2.69531	8.58935e-05	2.88252	0.00137728	0.351388	0.609017
200460	chr1	38246850	38247899	Stable	3.10292	3.36738e-05	2.50056	0.00136208	0.261931	0.737362
200461	chr1	38248350	38248999	Stable	2.6436	0.000143742	3.03536	0.00167052	0.314742	0.680094
200462	chr1	38257650	38257899	HH_sensitive	2.49689	0.000253978	1.99823	0.0137204	1.54309	0.0420898
200463	chr1	38258150	38258449	HH_sensitive	2.69338	8.75178e-05	1.62136	0.0141744	1.48132	0.0356276
200464	chr1	38258950	38262099	Stable	3.67355	1.61828e-05	2.66094	0.000879773	1.10413	0.0911275
200465	chr1	38262700	38264599	Stable	3.82205	1.55559e-05	3.20449	0.000555155	1.14167	0.0856856
200466	chr1	38270000	38270149	HH_dependent	2.64102	0.000195303	-0.232554	0.598072	1.74584	0.0215575
200467	chr1	38286200	38286299	other	2.38116	0.000619338	0.143993	0.894139	1.40956	0.29562
200468	chr1	38291300	38291949	Stable	3.30973	2.86284e-05	2.80175	0.00289877	0.0858401	0.936522
200469	chr1	38292850	38293349	Stable	2.47054	0.000175036	2.74975	0.000685738	0.0433562	0.964007
200470	chr1	38293500	38293649	ctrlonly	-0.873277	0.114762	4.40195	0.000443248	-2.4728	0.022122
200471	chr1	38293750	38293949	Stable	1.29943	0.0190495	3.20777	0.00162324	-0.746097	0.359658
200472	chr1	38294050	38294299	other	0.716599	0.160965	3.69441	0.000796517	-0.165794	0.84046
200473	chr1	38298000	38298199	Stable	3.01866	4.34795e-05	1.10383	0.0246996	1.32428	0.0549511
200474	chr1	38304100	38305199	Stable	3.31424	3.43209e-05	3.28618	0.000494726	0.19053	0.815632
200475	chr1	38307050	38307449	Stable	2.84927	0.000535208	2.08081	0.00630852	0.779047	0.262686
200476	chr1	38307500	38308699	Stable	3.43836	2.05781e-05	2.7761	0.000834401	1.02548	0.106509
200477	chr1	38309100	38310149	Stable	2.69044	9.28697e-05	2.60256	0.000701555	0.246505	0.739246
200478	chr1	38310500	38310799	Stable	2.83838	0.000185343	2.33965	0.00120892	0.00515165	0.996137
200479	chr1	38311000	38311199	Stable	1.98454	0.00112654	3.4101	0.000498284	-0.0149112	0.989104
200480	chr1	38318300	38318399	Stable	3.06226	0.000122662	1.8738	0.023793	0.408216	0.653158
200481	chr1	38321100	38321199	other	0.552767	0.331674	2.31824	0.00221441	-0.643601	0.329455
200482	chr1	38334150	38334649	Stable	2.33598	0.000432348	2.84562	0.000580712	0.452508	0.523051
200483	chr1	38357150	38357899	Stable	3.59224	1.991e-05	1.61072	0.00664166	1.20488	0.0693335
200484	chr1	38358550	38358749	HH_sensitive	2.8193	7.02335e-05	1.84295	0.0173688	1.65153	0.0286769
200485	chr1	38358800	38359399	Stable	3.10789	5.71126e-05	2.12271	0.00458937	1.24454	0.0698844
200486	chr1	38387850	38388149	Stable	2.67519	0.000278439	1.9379	0.00242042	0.479633	0.481111
200487	chr1	38388650	38388749	other	1.64503	0.00802057	-0.0326023	0.958428	0.952599	0.255055
200488	chr1	38389250	38389399	HH_sensitive	2.64311	0.000354484	1.59384	0.0358036	1.79719	0.0215288
200489	chr1	38392750	38392999	Stable	3.02364	5.76248e-05	1.82365	0.00764103	0.948964	0.15671
200490	chr1	38393300	38393399	Stable	1.58081	0.00487947	2.5195	0.00494576	0.421769	0.628371
200491	chr1	38393550	38393699	other	2.73844	0.00025795	-0.791802	0.516146	2.24286	0.149682
200492	chr1	38393900	38394099	Stable	2.15661	0.000768223	2.42858	0.00140623	0.612381	0.412961
200493	chr1	38394400	38394499	other	2.89498	0.00046955	0.537414	0.28202	1.26956	0.0974228
200494	chr1	38395350	38395949	other	3.23134	3.36676e-05	0.947956	0.0821717	1.39424	0.0698448
200495	chr1	38402000	38402249	Stable	2.62647	0.00019879	2.11689	0.00566211	0.0302082	0.979734
200496	chr1	38511550	38511699	HH_dependent	3.12522	7.2497e-05	0.688752	0.129852	1.46032	0.0498558
200497	chr1	38511850	38512149	Stable	2.91741	6.7639e-05	1.71071	0.0108565	1.29321	0.0734647
200498	chr1	38513100	38513249	HH_dependent	2.97488	6.71721e-05	-0.00473675	0.991621	1.97353	0.0240759
200499	chr1	38513700	38513799	HH_dependent	2.94907	8.23733e-05	-1.68064	0.0186086	3.43533	0.00235668
200500	chr1	38540750	38540999	HH_dependent	2.60402	0.000256329	-2.07545	0.0163142	4.48098	0.00286775
200501	chr1	38541250	38541399	HH_dependent	3.28897	0.000360904	-1.07416	0.243484	3.2582	0.0198527
200502	chr1	38542750	38542899	other	2.67375	0.000118248	0.203964	0.794609	1.86356	0.056923
200503	chr1	38547350	38547449	Stable	1.51467	0.0107519	1.63164	0.0048573	0.130113	0.876966
200504	chr1	38547650	38547949	Stable	2.88867	5.31266e-05	1.79951	0.00385789	0.943204	0.139682
200505	chr1	38548250	38548449	Stable	1.99534	0.00107959	2.22974	0.00332166	0.0733574	0.945529
200506	chr1	38548900	38549199	Stable	2.90858	7.09534e-05	1.96407	0.0045432	0.161014	0.86494
200507	chr1	38549500	38549649	Stable	2.20079	0.00205594	2.55353	0.0132969	0.577836	0.527987
200508	chr1	38626400	38627399	HH_sensitive	3.83547	1.76669e-05	1.30556	0.0282318	2.25984	0.0138166
200509	chr1	38627600	38628049	HH_sensitive	3.69799	2.00195e-05	1.83054	0.00727106	1.55334	0.0430413
200510	chr1	38660400	38660499	HH_dependent	2.40389	0.00107316	-1.23418	0.0268607	3.30328	0.00794824
200511	chr1	38660900	38661099	HH_dependent	2.90782	8.48504e-05	0.666559	0.204044	2.8201	0.00499385
200512	chr1	38663100	38663299	HH_dependent	2.65042	0.000203121	-1.05745	0.237179	3.5527	0.0108502
200513	chr1	38664250	38664349	HH_dependent	2.86164	0.000154242	-1.23418	0.0268607	3.53581	0.00213067
200514	chr1	38665500	38666549	HH_dependent	3.4188	1.99859e-05	-0.555351	0.308954	4.27899	0.00178076
200515	chr1	38666900	38667149	HH_dependent	2.31449	0.00032155	-0.193455	0.727104	4.22127	0.00175345
200516	chr1	38667300	38667899	HH_dependent	3.5132	6.95746e-05	-0.875437	0.312536	3.794	0.00926497
200517	chr1	38669800	38669899	HH_dependent	2.60935	0.000110764	-0.508707	0.321948	4.24888	0.00158904
200518	chr1	38671600	38671949	HH_dependent	3.15684	3.41822e-05	-0.771657	0.15529	3.40807	0.00228229
200519	chr1	38672250	38672349	HH_dependent	3.53868	2.71328e-05	-1.20641	0.0197246	3.95181	0.00200598
200520	chr1	38678700	38679199	HH_dependent	4.95344	1.55559e-05	-0.430112	0.371722	4.95344	0.00158904
200521	chr1	38679250	38679949	HH_dependent	3.10951	4.1314e-05	-2.11651	0.0336467	5.34725	0.00281077
200522	chr1	38680300	38680599	HH_dependent	2.86028	6.31546e-05	0.958283	0.276767	3.16486	0.00924134
200523	chr1	38680800	38681049	HH_dependent	2.52151	0.00016121	-1.80846	0.0594143	4.13966	0.00611884
200524	chr1	38682550	38682699	HH_dependent	2.1069	0.000884506	-0.747383	0.232302	2.01491	0.0172755
200525	chr1	38694150	38694399	HH_dependent	2.46336	0.000177953	0.825179	0.344998	2.08458	0.0339217
200526	chr1	38696550	38696699	HH_dependent	2.2311	0.00040575	0.491597	0.331699	3.37904	0.00381625
200527	chr1	38698100	38698349	HH_dependent	2.37468	0.000298106	0.333614	0.49612	2.31611	0.0129945
200528	chr1	38698700	38699249	HH_dependent	3.15025	6.45186e-05	0.9276	0.098953	1.74573	0.0329214
200529	chr1	38699800	38700649	HH_sensitive	3.50014	1.84482e-05	1.35605	0.0248586	2.21274	0.0126587
200530	chr1	38700800	38701249	Stable	2.93806	7.14867e-05	1.4234	0.00936631	1.33379	0.050843
200531	chr1	38701500	38701649	other	2.32788	0.000632491	0.405147	0.575974	1.87719	0.0694901
200532	chr1	38734800	38735149	HH_dependent	2.79129	6.67528e-05	0.773477	0.0887139	2.05603	0.0119728
200533	chr1	38735400	38735749	HH_dependent	2.68811	0.000291172	1.23992	0.0551608	2.3698	0.0185123
200534	chr1	38736150	38736249	other	2.64439	0.000325356	0.613933	0.381773	0.854912	0.35909
200535	chr1	38738250	38738349	HH_dependent	2.68849	0.000170918	-0.714817	0.183311	2.61002	0.0101445
200536	chr1	38740400	38740549	HH_dependent	1.86471	0.00271779	-1.06846	0.121315	2.53172	0.0229913
200537	chr1	38742650	38742799	HH_dependent	2.7127	0.000218257	0.543802	0.598633	2.4895	0.0206164
200538	chr1	38743050	38743649	HH_dependent	3.45093	2.34784e-05	-1.76477	0.0981024	4.70886	0.00588387
200539	chr1	38744550	38745599	HH_dependent	2.98916	4.31237e-05	0.0724803	0.908368	3.72382	0.00417743
200540	chr1	38745700	38745899	HH_dependent	2.71274	0.000215588	-2.00986	0.0280155	4.04593	0.00378525
200541	chr1	38753550	38753649	HH_dependent	2.97543	8.21933e-05	0.478652	0.541727	2.4012	0.0328125
200542	chr1	38755700	38756149	HH_dependent	3.22098	3.17394e-05	-0.294365	0.639565	3.67546	0.00205847
200543	chr1	38756300	38756499	HH_dependent	2.67522	9.13862e-05	-0.554047	0.494238	4.17938	0.00210039
200544	chr1	38756650	38756849	HH_dependent	2.53341	0.000187359	-1.69652	0.00406136	5.25685	0.00158904
200545	chr1	38756950	38757699	HH_dependent	3.42468	4.37194e-05	0.294865	0.50835	3.75028	0.00237827
200546	chr1	38758200	38759599	HH_dependent	3.4325	2.18408e-05	-1.04146	0.0488901	4.8931	0.00158904
200547	chr1	38760050	38760549	HH_dependent	3.01246	7.19442e-05	-1.55826	0.139531	4.28835	0.00893505
200548	chr1	38761050	38761199	HH_dependent	2.20521	0.000542313	1.38488	0.0907343	2.12694	0.0110215
200549	chr1	38763250	38763399	HH_dependent	2.02175	0.00119373	-0.938819	0.0441669	4.34138	0.00158904
200550	chr1	38764000	38764099	HH_dependent	2.08188	0.00323021	-0.521424	0.51117	3.14227	0.00708054
200551	chr1	38764750	38764899	HH_dependent	2.10682	0.0012449	-1.20492	0.040596	2.51461	0.0162986
200552	chr1	38765250	38765599	HH_dependent	2.24201	0.000388295	-1.88679	0.0302628	4.19767	0.00443701
200553	chr1	38765700	38765849	HH_dependent	2.98913	0.000114102	-1.20492	0.040596	3.68477	0.00429322
200554	chr1	38766900	38766999	HH_dependent	2.62133	0.000285055	-1.27741	0.0681923	3.46762	0.00537484
200555	chr1	38768700	38768949	HH_dependent	3.12863	3.18746e-05	0.238669	0.732557	2.88108	0.0092425
200556	chr1	38770100	38770649	HH_sensitive	2.84292	7.22455e-05	1.16482	0.0453044	1.991	0.0145364
200557	chr1	38786150	38786449	HH_dependent	2.43249	0.000193097	0.197701	0.711203	2.61569	0.00574304
200558	chr1	38786600	38787299	HH_dependent	3.23715	3.05656e-05	0.888332	0.068959	2.11454	0.0136769
200559	chr1	38867300	38867549	HH_dependent	2.62581	0.000210201	-1.39567	0.0786908	4.42137	0.00252376
200560	chr1	38867600	38867799	HH_dependent	2.71951	0.000283675	-1.99105	0.018811	4.90457	0.00218332
200561	chr1	38868050	38868199	HH_dependent	2.41445	0.000727216	0.348962	0.59842	2.35427	0.0409342
200562	chr1	38868500	38868649	HH_dependent	3.33115	8.43073e-05	-0.485475	0.593218	2.88584	0.0255071
200563	chr1	38972650	38972849	ctrlonly	0.821496	0.123884	2.94883	0.0013047	-2.06775	0.0116227
200564	chr1	38973250	38973499	other	0.69576	0.192961	1.88715	0.00369597	-1.24503	0.0666101
200565	chr1	38987100	38987649	Stable	3.30317	3.19484e-05	3.66824	0.000644008	0.131026	0.890212
200566	chr1	38987700	38988849	Stable	3.87054	1.56388e-05	3.7931	0.00041966	-0.00247148	0.9982
200567	chr1	39255550	39258099	Stable	3.29693	2.85879e-05	3.79265	0.000428779	-0.819559	0.216213
200568	chr1	39281350	39283499	Stable	2.27808	0.000357409	3.52522	0.000421443	-1.08401	0.104279
200569	chr1	39283700	39284249	Stable	2.13856	0.00194432	2.80625	0.000659173	-0.990673	0.128273
200570	chr1	39287350	39287899	Stable	3.07677	9.75512e-05	2.91494	0.000583163	0.183955	0.854215
200571	chr1	39307600	39308149	Stable	1.31972	0.0198419	2.95752	0.000646791	-0.993718	0.165581
200572	chr1	39366950	39367699	Stable	3.71806	1.82371e-05	3.51788	0.000461899	0.0623323	0.94652
200573	chr1	39367850	39369499	Stable	4.26341	1.55559e-05	4.15775	0.00041966	-0.00484126	0.99678
200574	chr1	39398750	39398999	Stable	2.27992	0.000666337	2.34622	0.00419657	0.0434979	0.964219
200575	chr1	39479200	39479299	Stable	2.38796	0.00205228	1.74737	0.00690295	0.114898	0.937594
200576	chr1	39534900	39535599	Stable	3.65546	2.0708e-05	3.16046	0.000463178	-0.381682	0.572816
200577	chr1	39535700	39536549	Stable	3.97474	1.68675e-05	3.61822	0.000479166	-0.069507	0.947931
200578	chr1	39554900	39555049	Stable	1.55966	0.00933764	2.1728	0.00177458	0.113968	0.898872
200579	chr1	39555350	39556249	Stable	2.42099	0.000194366	3.56255	0.00041966	-1.22015	0.0659297
200580	chr1	39556300	39556949	Stable	2.03075	0.00143938	3.21604	0.000510679	-0.763803	0.273226
200581	chr1	39575900	39575999	Stable	1.71826	0.00248156	2.01629	0.00390471	-1.12268	0.0884645
200582	chr1	39576050	39578799	Stable	3.79215	1.59611e-05	4.11303	0.00041966	0.0101401	0.992692
200583	chr1	39676900	39677249	Stable	2.89771	7.16244e-05	2.46745	0.00227848	0.0290514	0.979563
200584	chr1	39686950	39687249	Stable	3.05567	5.83016e-05	3.2939	0.000609054	-0.900705	0.199737
200585	chr1	39687450	39687649	Stable	1.85125	0.003592	2.50024	0.00114582	-0.606989	0.450772
200586	chr1	39713600	39714149	Stable	1.76434	0.00362854	3.58134	0.000472754	-0.856028	0.24132
200587	chr1	39714200	39714349	Stable	1.9581	0.00307289	2.21518	0.00862352	-0.874132	0.318504
200588	chr1	39714450	39715049	common_ctrlhigh	1.76226	0.0021408	3.51701	0.000420657	-1.37974	0.0475922
200589	chr1	39758700	39759849	Stable	2.45681	0.000201495	3.4414	0.00041966	-1.02672	0.10676
200590	chr1	39760050	39763049	Stable	3.68965	1.71026e-05	4.13216	0.00041966	-0.333208	0.658825
200591	chr1	39888100	39888949	ctrlonly	0.967945	0.0850778	3.05846	0.000604079	-1.8411	0.0176856
200592	chr1	39889500	39889599	other	-0.180031	0.826212	2.26753	0.00988143	-1.43861	0.288734
200593	chr1	39889800	39890499	common_ctrlhigh	1.59657	0.00399312	3.22448	0.000639699	-1.53214	0.0313072
200594	chr1	39896150	39896399	common_ctrlhigh	1.25824	0.0432852	2.92286	0.00174936	-1.6627	0.0243676
200595	chr1	39899850	39903599	Stable	4.05817	1.55559e-05	4.24575	0.00041966	-0.0546004	0.959168
200596	chr1	40033450	40033549	Stable	1.64666	0.0184886	3.26486	0.00132954	-0.763924	0.375109
200597	chr1	40034300	40034449	HH_dependent	2.69212	0.00018294	-0.349379	0.52753	2.04804	0.0203002
200598	chr1	40139450	40140899	Stable	2.54374	0.000133154	2.92649	0.000513886	-0.329222	0.632792
200599	chr1	40171800	40171949	Stable	2.28591	0.00108451	2.4712	0.00392935	-0.135089	0.905315
200600	chr1	40172450	40172549	Stable	2.82856	0.000293329	1.64037	0.0353891	0.551843	0.556268
200601	chr1	40173800	40174149	Stable	2.62276	0.000144115	2.1698	0.00259935	-0.262127	0.73509
200602	chr1	40174850	40174999	Stable	1.47946	0.0136243	2.71163	0.00274838	-0.244171	0.788622
200603	chr1	40179400	40179749	Stable	2.51639	0.000380592	3.16503	0.00075924	-0.324633	0.638929
200604	chr1	40187750	40188649	Stable	2.28261	0.000399091	2.97905	0.00197834	-0.518656	0.44642
200605	chr1	40221450	40222399	Stable	2.85419	9.12543e-05	3.30909	0.000509181	0.194357	0.835268
200606	chr1	40222500	40224149	Stable	3.44452	2.09674e-05	3.32604	0.000447699	0.179367	0.832176
200607	chr1	40224250	40226549	Stable	3.84825	1.55559e-05	3.92557	0.00041966	-0.24468	0.752981
200608	chr1	40227100	40227299	other	0.38879	0.423388	2.43087	0.000985572	-0.571891	0.392993
200609	chr1	40228400	40228549	Stable	2.32721	0.000425772	2.26811	0.00175379	0.263761	0.730919
200610	chr1	40230350	40230499	Stable	1.82061	0.00388652	2.5289	0.00424366	-0.0477146	0.96306
200611	chr1	40230650	40230799	Stable	2.64221	0.000114016	1.61771	0.00983081	0.522674	0.438653
200612	chr1	40232400	40235799	Stable	2.8441	6.20389e-05	3.72938	0.00041966	-0.59928	0.347412
200613	chr1	40235850	40237299	Stable	2.67361	9.8349e-05	3.79646	0.00041966	-0.785437	0.218125
200614	chr1	40237350	40237499	other	0.848493	0.0850864	2.3692	0.00529962	-1.02718	0.105088
200615	chr1	40237600	40237749	Stable	2.56034	0.000704471	2.32162	0.00132366	-0.137379	0.881281
200616	chr1	40252100	40252549	Stable	1.43858	0.0104183	3.03623	0.00116444	-1.16897	0.0962034
200617	chr1	40253050	40253449	common_ctrlhigh	1.47729	0.00846283	3.38983	0.000425672	-1.62579	0.0313842
200618	chr1	40253750	40253849	other	0.454024	0.404147	2.65353	0.00933882	-0.608974	0.371569
200619	chr1	40262350	40262549	Stable	2.50563	0.000170957	1.55655	0.00631766	0.531314	0.420656
200620	chr1	40262650	40263549	Stable	3.32312	2.44093e-05	3.68747	0.000456777	0.320424	0.660405
200621	chr1	40263900	40264549	Stable	3.2938	2.56722e-05	3.01371	0.000711891	0.362658	0.635286
200622	chr1	40265100	40267999	Stable	3.92741	1.56394e-05	3.87312	0.00041966	0.105877	0.913802
200623	chr1	40268550	40268799	Stable	2.63124	0.000120628	1.60919	0.0219556	0.761053	0.237315
200624	chr1	40274900	40276749	Stable	3.1579	3.64954e-05	3.42162	0.000422747	-0.0125315	0.99011
200625	chr1	40323700	40326299	Stable	3.91115	1.58356e-05	3.91083	0.00041966	-0.0672294	0.946624
200626	chr1	40326550	40326699	other	0.448561	0.377388	2.57382	0.00301426	-1.31365	0.0520931
200627	chr1	40358400	40358649	Stable	2.67557	0.000246	2.40285	0.00172785	-0.437821	0.552266
200628	chr1	40358800	40359099	Stable	1.34263	0.0154093	3.27975	0.000446686	-1.23838	0.0653544
200629	chr1	40359250	40359899	Stable	2.27719	0.000370598	2.90406	0.000613528	-1.15841	0.087179
200630	chr1	40360350	40360599	Stable	1.8652	0.00507042	3.73457	0.00041966	-1.37539	0.116063
200631	chr1	40361800	40361999	Stable	1.99446	0.00262094	4.29673	0.000459832	-1.259	0.0778667
200632	chr1	40372650	40372749	other	-0.257788	0.721012	2.14813	0.0281024	-1.81202	0.143846
200633	chr1	40373750	40373899	Stable	1.60942	0.00437848	1.90351	0.00309193	-0.941303	0.143869
200634	chr1	40378500	40378749	Stable	1.47109	0.0071398	1.951	0.00274915	-0.440546	0.504973
200635	chr1	40379650	40380099	Stable	1.97921	0.00100753	2.3065	0.00134394	-0.566125	0.380541
200636	chr1	40380200	40381549	Stable	3.08024	3.57413e-05	3.67402	0.00041966	-0.548047	0.386559
200637	chr1	40381600	40381699	ctrlonly	0.253027	0.794096	2.593	0.000978574	-3.01868	0.0446106
200638	chr1	40382100	40382299	Stable	1.6121	0.00613266	2.25849	0.00631538	-0.609253	0.465189
200639	chr1	40382700	40382999	Stable	1.66303	0.00950358	2.99524	0.000521036	-1.13065	0.178697
200640	chr1	40383250	40383349	ctrlonly	0.648003	0.181986	2.62089	0.00162459	-1.73103	0.033138
200641	chr1	40384950	40385749	Stable	2.19428	0.000453211	3.54775	0.00041966	-0.934583	0.143484
200642	chr1	40391650	40391799	common_ctrlhigh	1.17706	0.0437614	3.77977	0.00130114	-1.86762	0.0196465
200643	chr1	40392000	40392099	other	0.752084	0.243635	1.80365	0.00509465	-1.34903	0.0594056
200644	chr1	40392400	40393299	common_ctrlhigh	2.20206	0.00057417	3.48983	0.000422495	-1.60926	0.0363445
200645	chr1	40393450	40394349	common_ctrlhigh	2.68854	0.000112042	3.58805	0.00041966	-1.44687	0.0449896
200646	chr1	40400500	40400599	Stable	1.54477	0.00763999	3.07395	0.00051253	-0.65498	0.303354
200647	chr1	40400850	40401049	Stable	2.87852	0.000416303	2.64433	0.00330481	-0.865597	0.165273
200648	chr1	40401150	40401899	Stable	2.11635	0.00125697	2.72573	0.00063064	-0.906017	0.148831
200649	chr1	40402050	40402149	other	1.01758	0.0617825	2.87775	0.00305093	-0.659953	0.354149
200650	chr1	40413500	40414199	Stable	2.1027	0.000732404	2.92845	0.000756766	-0.281642	0.731361
200651	chr1	40414500	40414649	Stable	1.71752	0.00247979	2.43404	0.00206684	0.238883	0.748186
200652	chr1	40414900	40415999	Stable	2.2932	0.00029971	3.24815	0.000473685	-0.668596	0.28447
200653	chr1	40417350	40417549	Stable	1.50719	0.0077222	2.69871	0.000828006	-1.13824	0.0980772
200654	chr1	40419700	40419899	Stable	1.81613	0.00306961	3.46436	0.00177498	-0.51892	0.432331
200655	chr1	40421450	40421649	other	0.762059	0.166902	1.91342	0.00863162	-0.719306	0.385604
200656	chr1	40427500	40427749	Stable	1.94148	0.00703495	2.74966	0.000763231	-0.915368	0.314076
200657	chr1	40430100	40430199	other	0.283253	0.576697	2.04675	0.00362016	-1.35164	0.050843
200658	chr1	40430300	40430499	ctrlonly	0.604841	0.265249	2.14184	0.00202356	-1.93091	0.0149478
200659	chr1	40430900	40431449	Stable	1.36523	0.0108308	2.8635	0.00053303	-1.32675	0.0514122
200660	chr1	40431850	40431999	other	0.328783	0.641593	2.56665	0.000880784	-1.98803	0.0955627
200661	chr1	40432750	40433099	ctrlonly	0.285954	0.574179	3.08624	0.000561177	-2.45936	0.0115323
200662	chr1	40433300	40435649	common_ctrlhigh	2.08771	0.000725346	4.12135	0.00041966	-1.72054	0.0240603
200663	chr1	40435800	40446349	Stable	3.67024	1.62349e-05	4.62769	0.00041966	-0.840977	0.182923
200664	chr1	40446500	40447299	Stable	2.93577	5.33407e-05	2.95921	0.00119429	-0.143159	0.884806
200665	chr1	40447400	40448199	Stable	3.38944	3.08427e-05	3.09248	0.000459796	-0.0861039	0.923968
200666	chr1	40448500	40449199	Stable	2.73029	8.14633e-05	2.89886	0.000695647	-0.0414353	0.965234
200667	chr1	40449300	40449549	Stable	2.25973	0.000948377	2.98149	0.00153517	0.239532	0.757423
200668	chr1	40449750	40449999	Stable	1.79454	0.00274125	2.77709	0.000610988	-0.681799	0.310072
200669	chr1	40466200	40466399	Stable	1.10831	0.035678	3.55274	0.00122636	-0.687189	0.277142
200670	chr1	40468350	40468449	Stable	2.52887	0.00060234	1.56136	0.0242002	-0.839856	0.373353
200671	chr1	40469200	40469399	Stable	2.64706	0.000101004	1.92909	0.00341981	-0.603131	0.359971
200672	chr1	40471300	40471499	other	1.38422	0.0521728	2.48873	0.0023333	-1.46876	0.138825
200673	chr1	40471650	40471799	Stable	2.05044	0.000936361	2.68932	0.00158285	0.0423264	0.967164
200674	chr1	40471850	40472449	Stable	2.80048	7.04429e-05	2.90659	0.00174651	-0.489539	0.468352
200675	chr1	40472750	40473599	Stable	2.01256	0.000933885	2.99714	0.000556236	-0.878325	0.159377
200676	chr1	40515050	40515749	Stable	2.38096	0.000347055	3.0868	0.000582399	-1.0408	0.132898
200677	chr1	40543250	40543349	Stable	2.2821	0.000458968	2.09202	0.0100252	-0.135597	0.884798
200678	chr1	40544100	40544699	Stable	2.84251	6.92577e-05	2.67897	0.000816797	-0.124727	0.889346
200679	chr1	40585850	40587049	Stable	1.59805	0.00456224	3.45574	0.000448146	-1.19011	0.0812781
200680	chr1	40587300	40588099	common_ctrlhigh	1.16723	0.0275428	3.98388	0.00041966	-1.78301	0.0225259
200681	chr1	40600150	40601199	Stable	2.44021	0.000201919	3.17493	0.0004635	-0.404069	0.562784
200682	chr1	40601250	40601499	Stable	2.35403	0.000459591	2.59689	0.00131669	-0.341092	0.66199
200683	chr1	40601750	40602199	Stable	2.11096	0.000533118	3.84928	0.000424869	-0.859347	0.165444
200684	chr1	40772800	40773299	Stable	2.11964	0.00551298	2.98496	0.000513667	-1.43019	0.0780783
200685	chr1	40773550	40774399	Stable	2.36411	0.000291539	3.02529	0.000757756	-0.784205	0.273987
200686	chr1	40775200	40775849	Stable	2.26641	0.00108892	2.84375	0.000696278	-1.04068	0.108678
200687	chr1	40786400	40786549	Stable	1.20247	0.0209851	2.34947	0.00149127	-1.05898	0.100188
200688	chr1	40788150	40788249	other	0.773975	0.192087	1.85397	0.00589579	-1.05171	0.22602
200689	chr1	40788400	40788549	other	2.37793	0.000484436	2.33463	0.055784	0.277649	0.842842
200690	chr1	40788600	40791749	Stable	3.71074	1.79081e-05	4.10659	0.00041966	-0.486358	0.500687
200691	chr1	40792100	40792499	Stable	2.17641	0.00112174	3.34074	0.000557325	-0.618411	0.471576
200692	chr1	40792650	40793899	Stable	3.30684	4.02469e-05	2.7867	0.000717724	-0.218078	0.813043
200693	chr1	40794000	40794349	Stable	3.36567	2.19111e-05	4.51295	0.00133949	-0.474484	0.463149
200694	chr1	40794700	40794949	Stable	2.57906	0.000287669	2.4799	0.0011624	-0.134063	0.896591
200695	chr1	40798750	40798999	Stable	2.13922	0.00223721	3.39577	0.000902954	-0.636359	0.414197
200696	chr1	40802350	40802849	Stable	2.79738	0.000148246	2.62165	0.000768516	-0.156064	0.852865
200697	chr1	40803250	40803499	Stable	1.66748	0.00633941	2.44182	0.00228445	-0.422285	0.658203
200698	chr1	40808650	40808749	Stable	1.77142	0.00659135	2.34694	0.00246629	-0.714152	0.263072
200699	chr1	40824450	40825049	Stable	2.55863	0.000188513	3.26762	0.00048376	-0.678567	0.330798
200700	chr1	40825100	40825249	Stable	1.14566	0.0437254	2.13253	0.00442109	-0.654735	0.456387
200701	chr1	40825400	40825649	Stable	2.299	0.000758237	3.04168	0.000527689	-0.704554	0.284927
200702	chr1	40825750	40826099	Stable	1.72274	0.00701116	2.56586	0.000770474	-0.379263	0.587146
200703	chr1	40833600	40833799	other	0.362586	0.473972	2.64175	0.00251929	-1.2431	0.0942197
200704	chr1	40834050	40834149	Stable	2.20223	0.000527279	3.38389	0.000828006	-0.282269	0.772438
200705	chr1	40834350	40835499	Stable	2.19549	0.000425381	4.01197	0.000421612	-0.780913	0.244612
200706	chr1	40835900	40840649	Stable	3.26478	3.00655e-05	3.65514	0.00041966	-0.46157	0.502917
200707	chr1	40840750	40849849	Stable	3.37467	2.73734e-05	3.82139	0.00041966	-0.366235	0.629591
200708	chr1	40850200	40850549	Stable	2.2358	0.00035586	3.20933	0.000525827	-0.656144	0.299391
200709	chr1	40850800	40851099	Stable	1.3105	0.0216017	2.72991	0.000773152	-1.07007	0.117157
200710	chr1	40851150	40851349	Stable	1.69183	0.00775793	2.95708	0.0101999	-0.584316	0.629094
200711	chr1	40851450	40852099	Stable	2.64964	0.000118537	3.35548	0.000426343	-0.650732	0.322702
200712	chr1	40852150	40852399	Stable	1.23197	0.0231033	2.71433	0.00186443	-1.19183	0.0842541
200713	chr1	40852750	40852849	Stable	3.01473	4.59152e-05	1.33793	0.0257619	-0.508153	0.501769
200714	chr1	40853550	40853799	Stable	1.77624	0.00795099	3.03457	0.000548088	-1.37412	0.0647245
200715	chr1	40854100	40854299	other	0.448126	0.420039	2.51521	0.00151174	-1.57457	0.0681095
200716	chr1	40854350	40854949	Stable	2.2817	0.000423462	3.02019	0.000477643	-1.10627	0.0934329
200717	chr1	40855000	40855549	Stable	2.4876	0.000192888	3.01451	0.000609526	-0.523752	0.421257
200718	chr1	40855900	40856949	Stable	2.01114	0.000791208	3.31365	0.000423014	-1.07673	0.0936919
200719	chr1	40857150	40857349	Stable	2.23032	0.000887618	2.51871	0.000841331	-0.652817	0.312823
200720	chr1	40857600	40858049	Stable	2.1876	0.000556229	3.3789	0.00130272	-0.708122	0.37746
200721	chr1	40858150	40858299	Stable	2.24309	0.001012	2.61563	0.00154901	-0.617552	0.335219
200722	chr1	40859450	40859549	other	0.610855	0.229392	1.96779	0.00494929	-0.133594	0.883318
200723	chr1	40866700	40866999	other	0.904714	0.117966	2.97394	0.000964459	-0.799097	0.382004
200724	chr1	40873550	40873849	Stable	3.21123	3.46284e-05	1.37212	0.0335083	0.287204	0.700671
200725	chr1	40874550	40874799	other	2.20926	0.00125724	0.813034	0.152055	0.342555	0.749331
200726	chr1	40878450	40879249	Stable	1.96023	0.00209123	3.57982	0.000613977	-0.4122	0.606409
200727	chr1	40879350	40879999	Stable	2.73103	0.000137515	3.01299	0.000674589	-0.0342389	0.976682
200728	chr1	40884100	40884199	Stable	1.91569	0.00170093	1.69715	0.00689118	-0.480581	0.497549
200729	chr1	40968600	40968699	ctrlonly	0.237269	0.615177	2.64171	0.00205718	-2.31926	0.00857396
200730	chr1	40993200	40993349	HH_dependent	2.8054	7.00512e-05	0.823821	0.147623	1.69887	0.0221631
200731	chr1	41002250	41002349	Stable	2.21078	0.00344505	3.44791	0.000421443	-0.371694	0.681773
200732	chr1	41002650	41002749	Stable	2.01129	0.000869652	1.53574	0.016807	-0.159618	0.85231
200733	chr1	41025500	41025699	other	2.7822	0.000866726	1.45197	0.11922	0.256208	0.835201
200734	chr1	41028450	41028599	other	-0.169174	0.798299	2.19704	0.00598578	-1.68605	0.0709513
200735	chr1	41034400	41036549	Stable	2.90612	5.76548e-05	3.73015	0.00041966	-0.6938	0.276888
200736	chr1	41037050	41037149	other	0.443102	0.40794	1.66554	0.0150627	-0.254858	0.78945
200737	chr1	41131450	41131649	Stable	3.41537	4.50158e-05	1.4589	0.0380978	0.296726	0.676216
200738	chr1	41132700	41136049	Stable	2.8588	7.55901e-05	3.74685	0.00041966	-0.86229	0.194486
200739	chr1	41136750	41136899	other	2.69083	0.000121568	1.38212	0.106452	0.913104	0.334783
200740	chr1	41137950	41138599	Stable	2.52711	0.000178674	2.98274	0.000514882	-0.829543	0.183584
200741	chr1	41138900	41146749	Stable	3.2249	3.81712e-05	4.07085	0.00041966	-0.639732	0.359797
200742	chr1	41152150	41152549	Stable	1.49905	0.00883512	3.29818	0.000476952	-1.04428	0.107221
200743	chr1	42851250	42852099	Stable	3.8318	1.9964e-05	3.52255	0.00041966	0.0463282	0.967165
200744	chr1	43091850	43093299	Stable	3.70977	1.72074e-05	3.42839	0.000442239	0.469818	0.524031
200745	chr1	43097600	43099399	Stable	3.92407	1.58593e-05	4.42706	0.00041966	0.0521257	0.961196
200746	chr1	43128000	43128149	Stable	1.9735	0.00421451	2.25638	0.00495386	-0.979537	0.264478
200747	chr1	43128850	43129099	Stable	1.4378	0.0123547	2.36412	0.00105368	-0.963228	0.135861
200748	chr1	43140000	43140399	Stable	2.60146	0.000172019	2.87433	0.000793422	-0.0647369	0.948045
200749	chr1	43140850	43140999	Stable	1.72785	0.00353465	2.2495	0.00493419	-0.614719	0.39955
200750	chr1	43141200	43142599	Stable	2.95615	5.48164e-05	3.01461	0.000522454	-0.120359	0.894411
200751	chr1	43142950	43143299	Stable	2.59216	0.000126828	3.09432	0.00140116	0.148715	0.862321
200752	chr1	43143350	43143799	Stable	3.08049	4.02277e-05	2.38942	0.00561313	0.546355	0.479241
200753	chr1	43143850	43144249	Stable	2.54619	0.000405296	2.94424	0.00136408	0.405686	0.631044
200754	chr1	43144400	43149599	Stable	3.12535	3.45994e-05	3.93983	0.00041966	-0.505201	0.43616
200755	chr1	43150200	43150449	Stable	1.8074	0.00176821	2.85683	0.000662586	-0.125284	0.887554
200756	chr1	43150500	43150649	Stable	2.7147	0.000572429	3.19127	0.00136958	-0.194985	0.802978
200757	chr1	43150950	43151049	other	0.852465	0.0971207	3.13741	0.00467267	-0.978334	0.146095
200758	chr1	43151250	43151349	other	1.7004	0.00350293	1.32212	0.0617315	1.25479	0.0951628
200759	chr1	43153650	43153949	Stable	2.85341	0.000351711	1.80479	0.00522091	0.623662	0.344461
200760	chr1	43154550	43155249	Stable	3.06982	3.64956e-05	1.65375	0.00534667	0.781961	0.204573
200761	chr1	43155450	43155549	HH_dependent	2.85366	0.00026096	0.705681	0.155816	1.52092	0.0425231
200762	chr1	43156350	43156449	other	2.28361	0.000325189	0.566971	0.427354	1.96648	0.05349
200763	chr1	43157200	43157399	Stable	2.70461	0.000102501	1.69783	0.0113679	1.12999	0.10039
200764	chr1	43157450	43157599	Stable	2.11991	0.000629826	1.69273	0.00766928	0.595462	0.388213
200765	chr1	43158150	43159649	Stable	2.92616	4.89158e-05	1.91114	0.00285536	0.861672	0.166071
200766	chr1	43159700	43160699	Stable	3.0687	4.2838e-05	3.04765	0.00053557	0.195941	0.804574
200767	chr1	43160900	43160999	Stable	1.46282	0.0105236	3.14535	0.00651581	-0.537737	0.432829
200768	chr1	43161050	43161399	Stable	2.31259	0.000302043	2.34807	0.00113668	0.146903	0.865684
200769	chr1	43161800	43161949	Stable	2.63699	0.000181648	2.19305	0.00182195	0.173301	0.831311
200770	chr1	43162000	43164649	Stable	3.72601	2.19139e-05	3.96661	0.00041966	0.246157	0.797637
200771	chr1	43167750	43167899	Stable	2.45963	0.000184945	2.87785	0.00765485	-0.0156017	0.989044
200772	chr1	43168100	43170649	Stable	2.90788	6.00654e-05	3.57324	0.000433183	-0.665301	0.305707
200773	chr1	43174150	43174249	Stable	2.40866	0.00036144	2.08839	0.00199682	-0.674818	0.320893
200774	chr1	43174350	43174499	Stable	2.32429	0.000263364	2.61176	0.000909591	0.221974	0.780475
200775	chr1	43201200	43201349	other	2.85162	7.49164e-05	1.29103	0.237274	1.67052	0.176991
200776	chr1	43201500	43201649	other	0.636249	0.211762	2.84431	0.000922999	-1.24165	0.0976722
200777	chr1	43201850	43201949	Stable	2.35513	0.00296495	1.75244	0.0402204	-0.385493	0.733894
200778	chr1	43202500	43202799	other	3.34126	0.00102059	1.08242	0.194684	0.858273	0.404162
200779	chr1	43218300	43218649	Stable	2.74763	0.000105884	2.66115	0.00179315	-0.126979	0.885938
200780	chr1	43218900	43218999	Stable	2.45145	0.000214338	1.42795	0.0219557	0.370639	0.647092
200781	chr1	43222300	43222449	Stable	1.20225	0.027377	3.29857	0.00168466	-1.26085	0.08253
200782	chr1	43223650	43226199	Stable	3.41404	2.16424e-05	3.65836	0.00041966	-0.432289	0.520785
200783	chr1	43235750	43238199	Stable	3.35002	2.77224e-05	2.78528	0.000620507	0.511086	0.467507
200784	chr1	43238550	43238799	Stable	2.88009	8.46349e-05	3.42506	0.000504055	0.622606	0.317819
200785	chr1	43238900	43239099	Stable	2.18291	0.000528056	1.80475	0.00544818	0.126143	0.890414
200786	chr1	43244300	43245149	HH_sensitive	3.95372	1.61558e-05	2.60731	0.00142493	1.58365	0.0386361
200787	chr1	43245550	43246099	Stable	3.50629	2.53956e-05	2.07218	0.0108968	1.16369	0.13051
200788	chr1	43246850	43246999	Stable	2.48858	0.000238726	1.41216	0.0090802	1.29529	0.0581807
200789	chr1	43251100	43251199	other	1.20536	0.0237589	0.670633	0.590397	0.199939	0.928411
200790	chr1	43255900	43256049	Stable	2.25412	0.00048869	2.63861	0.00913015	0.458498	0.65559
200791	chr1	43256200	43256499	Stable	1.45983	0.0134381	3.82626	0.00166903	-0.328248	0.660653
200792	chr1	43258650	43258749	Stable	1.39351	0.0129948	2.35822	0.00228309	-0.72285	0.341929
200793	chr1	43259850	43260449	Stable	2.79872	0.00011297	2.39303	0.00122771	0.0501271	0.959272
200794	chr1	43260650	43260749	Stable	1.82163	0.00273157	2.37181	0.0410323	0.053048	0.960156
200795	chr1	43260800	43261049	Stable	2.96341	8.96994e-05	2.24478	0.00237059	0.276207	0.726342
200796	chr1	43263950	43264099	Stable	2.45963	0.000184945	2.26216	0.00428459	-0.0507802	0.965043
200797	chr1	43264150	43264349	Stable	1.84606	0.0031196	2.56106	0.00181894	-0.178205	0.871022
200798	chr1	43264750	43265199	Stable	2.83328	0.000118283	2.86744	0.00123527	-0.0594989	0.952008
200799	chr1	43269500	43269699	Stable	1.90373	0.00373044	1.78466	0.00348719	0.554809	0.438634
200800	chr1	43445350	43445649	Stable	2.57152	0.000381638	2.55377	0.000753427	0.263937	0.784038
200801	chr1	43445750	43446749	Stable	3.95093	1.58694e-05	3.94293	0.00041966	0.373097	0.640817
200802	chr1	43714400	43714749	Stable	3.04024	6.77451e-05	1.76895	0.00884043	0.918378	0.242314
200803	chr1	43715300	43715499	HH_dependent	2.44624	0.000192323	-1.69974	0.0503925	3.57946	0.00740677
200804	chr1	43767200	43767399	other	0.250562	0.672487	3.31572	0.000451995	-0.915215	0.199312
200805	chr1	43817750	43820949	Stable	2.49311	0.000165659	3.8016	0.00041966	-1.17871	0.0785339
200806	chr1	43826250	43826349	Stable	1.05152	0.0397737	2.96761	0.00283295	-0.599578	0.353576
200807	chr1	43827050	43827749	Stable	3.89685	1.75042e-05	3.52776	0.000422791	-0.330287	0.690346
200808	chr1	43828100	43828899	Stable	3.59929	1.79415e-05	3.50557	0.000422152	-0.0356027	0.970561
200809	chr1	43863000	43863449	ctrlonly	0.914292	0.105693	2.83936	0.000549076	-1.62398	0.0264182
200810	chr1	43869150	43869349	ctrlonly	-0.0590458	0.901032	2.45306	0.00119336	-2.05331	0.0144261
200811	chr1	43932750	43934949	Stable	4.08046	1.55559e-05	4.19683	0.00041966	-0.271711	0.735723
200812	chr1	43935000	43935199	Stable	2.24572	0.000342945	2.41886	0.00212977	-0.597422	0.334988
200813	chr1	43968300	43968399	other	2.34067	0.000500011	0.772353	0.118043	1.09504	0.0897519
200814	chr1	43968750	43968849	Stable	2.42958	0.00036937	1.52794	0.0137204	1.3135	0.0640768
200815	chr1	43969050	43969299	Stable	3.15413	3.45272e-05	1.55391	0.00644915	1.14301	0.0872862
200816	chr1	43969750	43969849	Stable	3.28086	3.38887e-05	2.4409	0.00659046	0.744379	0.343174
200817	chr1	44042050	44042549	Stable	2.54191	0.000378242	3.22973	0.000434954	0.379123	0.587503
200818	chr1	44101600	44101849	Stable	3.01445	0.000302033	1.49725	0.0170943	0.837142	0.241205
200819	chr1	44102600	44103249	Stable	3.03096	3.96387e-05	2.45697	0.00148601	0.0409052	0.967019
200820	chr1	44117700	44120499	Stable	3.54772	2.43292e-05	4.04328	0.00041966	0.027081	0.980994
200821	chr1	44147200	44147749	Stable	2.8526	0.000135265	3.02551	0.000839934	0.163803	0.862227
200822	chr1	44147850	44148799	Stable	3.75479	1.6822e-05	3.68351	0.000429877	0.159468	0.853009
200823	chr1	44465400	44465699	Stable	2.72304	0.000111202	2.47359	0.00138756	0.0325227	0.974534
200824	chr1	44465900	44465999	Stable	1.23084	0.0483991	1.37698	0.0171641	-0.977234	0.150204
200825	chr1	44550900	44553299	Stable	4.02751	1.56052e-05	3.76222	0.000423164	0.135924	0.889592
200826	chr1	44553350	44553499	Stable	1.52719	0.0116145	2.25289	0.00187746	-0.317533	0.693184
200827	chr1	44553600	44553849	Stable	3.12401	4.6516e-05	1.46315	0.0279597	1.35576	0.0908764
200828	chr1	44567800	44567899	other	2.18412	0.00060095	1.25393	0.115905	1.26885	0.0572267
200829	chr1	44575750	44575949	Stable	2.79328	0.000127558	2.92236	0.00225687	0.675936	0.293191
200830	chr1	44580000	44580349	Stable	2.3715	0.000226898	2.19079	0.00530954	0.281314	0.741275
200831	chr1	44580850	44581299	Stable	2.87466	0.000119766	2.0855	0.0135663	0.535977	0.434715
200832	chr1	44584050	44585899	Stable	3.11851	3.99276e-05	2.85547	0.000610552	0.176549	0.829239
200833	chr1	44678850	44679399	Stable	3.03161	5.24722e-05	3.77191	0.000420954	-1.13842	0.0878169
200834	chr1	44679750	44679949	Stable	2.24034	0.00042666	2.72985	0.00114674	-0.548649	0.433925
200835	chr1	44680100	44680299	other	0.468553	0.335228	2.61017	0.00196365	-1.46403	0.0647311
200836	chr1	44745250	44745499	Stable	1.7092	0.00599529	3.43295	0.00107223	-1.02904	0.131461
200837	chr1	44745900	44747999	Stable	3.89029	1.55559e-05	5.04187	0.00041966	-0.52849	0.432519
200838	chr1	44748050	44748649	Stable	2.39002	0.000341752	2.32031	0.00152053	-0.32752	0.661595
200839	chr1	44748950	44750199	Stable	2.82815	7.4184e-05	3.43852	0.00041966	-0.156292	0.847376
200840	chr1	44750450	44753099	Stable	4.11298	1.55559e-05	4.40846	0.00041966	-0.243931	0.751988
200841	chr1	44753400	44753749	Stable	1.82532	0.00236632	2.82044	0.000974832	-0.218124	0.789382
200842	chr1	44765500	44765749	Stable	3.13795	3.95064e-05	2.01303	0.00250582	0.173978	0.84046
200843	chr1	44778850	44779199	Stable	2.64336	0.000112486	1.70276	0.0111388	-0.0137316	0.989656
200844	chr1	44804500	44804649	Stable	2.18633	0.000421485	2.19878	0.0153501	1.2856	0.109069
200845	chr1	44804950	44805049	HH_dependent	3.12499	5.32825e-05	-1.03748	0.219164	2.39065	0.0422742
200846	chr1	44807300	44807399	other	1.79275	0.00200838	0.97871	0.0886703	0.551579	0.454342
200847	chr1	44810250	44810549	Stable	2.205	0.000391073	2.73728	0.000642956	0.0453942	0.961671
200848	chr1	44810600	44811249	Stable	3.59251	2.85117e-05	3.25395	0.00102657	-0.0424364	0.963987
200849	chr1	44811850	44812049	Stable	2.7575	8.17523e-05	2.8673	0.00112659	-0.0195159	0.986938
200850	chr1	44812750	44812899	Stable	2.10804	0.00108289	1.77997	0.028902	0.404037	0.568272
200851	chr1	44826400	44827799	Stable	3.32376	2.76411e-05	2.7305	0.0010001	0.64393	0.304863
200852	chr1	44828500	44828899	Stable	2.68915	0.000122056	1.72746	0.0196406	1.30189	0.099646
200853	chr1	44843200	44843299	Stable	1.60863	0.0158783	1.81487	0.00674691	-0.0575885	0.963274
200854	chr1	44849800	44850149	Stable	3.95485	1.55559e-05	2.22079	0.00270587	0.247565	0.759481
200855	chr1	44850650	44850749	Stable	2.1191	0.000662273	2.4754	0.00102177	0.0907413	0.918657
200856	chr1	44850850	44851399	Stable	3.02753	4.02878e-05	4.51462	0.00041966	-0.270593	0.724489
200857	chr1	44851550	44851649	other	2.8331	0.00012944	1.20303	0.0805087	1.3455	0.0781194
200858	chr1	44852150	44852249	other	1.47383	0.00783395	1.33878	0.0911923	0.130066	0.92411
200859	chr1	44861700	44864349	Stable	3.32895	2.2903e-05	4.44899	0.000477999	-0.782193	0.217607
200860	chr1	44864950	44865849	Stable	3.14058	4.90417e-05	3.44618	0.000650453	-0.409397	0.607772
200861	chr1	44867000	44867099	other	1.95429	0.0028098	0.177415	0.668223	0.230552	0.77005
200862	chr1	44867300	44867549	Stable	1.78154	0.00238706	2.30291	0.00256899	-0.39028	0.5803
200863	chr1	44871150	44871299	Stable	1.72632	0.0042309	2.04667	0.00236311	0.718621	0.255055
200864	chr1	44871500	44871899	Stable	2.29566	0.000357142	2.80718	0.00121927	-0.0413557	0.969043
200865	chr1	44872200	44872399	Stable	2.36484	0.00073879	2.85518	0.000595834	-0.249515	0.742787
200866	chr1	44877700	44877799	other	2.38003	0.000844496	0.691505	0.501806	1.76492	0.140882
200867	chr1	44878150	44878599	HH_dependent	3.44938	3.53831e-05	0.300461	0.669932	2.28266	0.036783
200868	chr1	44878650	44879649	Stable	3.61089	1.64891e-05	2.38781	0.00130001	1.25391	0.0592869
200869	chr1	44879800	44879999	HH_dependent	2.93509	5.93141e-05	-1.20641	0.0197246	4.38335	0.00159287
200870	chr1	44891900	44892049	Stable	2.51883	0.000164491	2.56912	0.00244051	-0.0451521	0.963227
200871	chr1	44892300	44892399	Stable	1.84386	0.00345476	2.76608	0.0061405	0.22479	0.852634
200872	chr1	44977650	44977899	Stable	2.68971	0.000100195	1.53075	0.0287276	0.115987	0.907408
200873	chr1	44983400	44983499	other	1.7786	0.0025963	1.05654	0.0662336	0.764895	0.22675
200874	chr1	44983550	44983649	Stable	2.50664	0.00101722	2.12876	0.00261317	0.103671	0.908607
200875	chr1	44985800	44986499	Stable	2.80464	7.32438e-05	2.86346	0.000971891	0.200743	0.804379
200876	chr1	44986700	44987899	Stable	3.17052	3.27388e-05	3.27678	0.000431908	0.0923343	0.918286
200877	chr1	44988000	44988349	Stable	3.17698	4.15614e-05	2.24868	0.00137389	0.608947	0.337151
200878	chr1	44991250	44991399	Stable	2.13906	0.00116578	1.86994	0.0140326	0.929695	0.151301
200879	chr1	45004700	45004799	Stable	1.65005	0.00778391	3.08056	0.000928772	-0.756342	0.298472
200880	chr1	45005050	45005199	Stable	2.1607	0.000620592	3.39199	0.00161252	-0.587097	0.400587
200881	chr1	45005250	45005349	Stable	2.19737	0.000439934	1.23085	0.046166	0.27723	0.75209
200882	chr1	45005450	45006349	Stable	3.06933	3.71151e-05	3.63283	0.000479137	-0.129548	0.892929
200883	chr1	45006550	45007549	Stable	2.82342	7.05193e-05	3.86771	0.00073006	-0.7644	0.263695
200884	chr1	45007900	45008199	Stable	2.15847	0.0010154	3.60521	0.0018627	-0.899124	0.257219
200885	chr1	45014450	45014599	Stable	1.77114	0.0096855	2.09575	0.00441301	-1.1557	0.139409
200886	chr1	45015550	45016949	Stable	3.02993	0.000124557	2.604	0.000909377	-0.135025	0.875297
200887	chr1	45017650	45024599	Stable	4.49051	1.55559e-05	4.83275	0.00041966	-0.397381	0.556788
200888	chr1	45024650	45026199	Stable	3.3073	3.05722e-05	3.55461	0.000431161	-0.572321	0.394851
200889	chr1	45026550	45027249	Stable	2.59029	0.000159223	3.39439	0.000445604	-0.348098	0.650086
200890	chr1	45027500	45028249	Stable	2.54532	0.000132663	3.80208	0.00047284	-0.927321	0.161749
200891	chr1	45028500	45028849	Stable	3.38028	0.000294582	3.82167	0.000775887	-0.874362	0.214072
200892	chr1	45028900	45031799	Stable	4.54236	1.55559e-05	4.89135	0.00041966	-0.558074	0.394391
200893	chr1	45031950	45036099	Stable	3.82063	1.55559e-05	4.49332	0.00041966	-0.635825	0.316932
200894	chr1	45036450	45036599	Stable	2.49543	0.000153782	2.77706	0.00312068	0.660194	0.321256
200895	chr1	45037100	45037399	Stable	2.65616	0.000134624	3.33863	0.000528028	-0.896398	0.151159
200896	chr1	45039800	45039949	Stable	1.4929	0.0104478	2.761	0.000604294	-0.829751	0.212246
200897	chr1	45040400	45045699	Stable	3.6698	1.60901e-05	4.38892	0.00041966	-0.787469	0.206734
200898	chr1	45085300	45085399	Stable	2.22114	0.000770112	2.04722	0.00479149	0.11224	0.903267
200899	chr1	45089800	45089949	Stable	2.04767	0.00399511	2.70874	0.0011133	-0.33625	0.70049
200900	chr1	45090400	45091149	Stable	2.60965	0.000127863	2.9191	0.000525775	-0.750175	0.244959
200901	chr1	45091550	45091799	Stable	2.23876	0.00160973	2.97285	0.000680268	-0.55621	0.408962
200902	chr1	45092850	45093049	other	1.34507	0.0561075	3.13018	0.000957095	-1.36598	0.0548843
200903	chr1	45112000	45112249	Stable	3.42947	4.85062e-05	2.33655	0.00571474	-0.0835191	0.927085
200904	chr1	45112800	45113049	other	0.865736	0.102437	2.53194	0.00186674	-1.07189	0.148316
200905	chr1	45113150	45113999	Stable	2.33112	0.000251016	3.22655	0.000635263	-0.341562	0.626218
200906	chr1	45114450	45114549	Stable	1.1834	0.0288554	1.87063	0.0068629	-0.541185	0.493611
200907	chr1	45114750	45120249	Stable	3.32216	2.29125e-05	4.50635	0.00041966	-0.864238	0.186738
200908	chr1	45121350	45121699	Stable	1.63617	0.00338374	3.11098	0.00111574	-1.02496	0.163173
200909	chr1	45121850	45121999	Stable	2.98855	5.83039e-05	1.1579	0.0215723	0.703471	0.252012
200910	chr1	45122050	45122349	Stable	1.91034	0.00129221	3.62688	0.000766631	-1.27661	0.059427
200911	chr1	45132050	45132449	Stable	1.84417	0.00670585	2.9849	0.000606898	-1.20122	0.0832789
200912	chr1	45132600	45132999	Stable	2.62374	0.00123974	2.88613	0.00074278	-0.444263	0.512324
200913	chr1	45133400	45133749	Stable	1.85513	0.0035725	2.45868	0.00151533	-0.687104	0.281521
200914	chr1	45133800	45134049	Stable	1.3671	0.0119902	3.17655	0.00197088	-1.2483	0.102893
200915	chr1	45134450	45135049	Stable	1.70407	0.0028812	3.11467	0.000455968	-1.33819	0.052049
200916	chr1	45135350	45136649	Stable	3.05701	4.39607e-05	3.50043	0.000447459	-0.721103	0.250902
200917	chr1	45137200	45137399	Stable	1.68903	0.00794902	3.95847	0.000892499	-1.14757	0.163521
200918	chr1	45143200	45143349	Stable	1.47781	0.025647	3.21161	0.00055067	-0.879528	0.184486
200919	chr1	45143550	45144299	Stable	1.60192	0.00389401	3.33707	0.000478089	-0.756931	0.219386
200920	chr1	45144600	45144699	other	0.944326	0.0685217	2.11534	0.00293851	-1.41175	0.0503607
200921	chr1	45146200	45148249	Stable	2.67481	9.61326e-05	3.43722	0.000427118	-0.89473	0.151005
200922	chr1	45176850	45181149	Stable	3.47562	1.95653e-05	4.00981	0.00041966	-0.639398	0.31649
200923	chr1	45181200	45181349	other	1.02721	0.119756	2.55476	0.00192848	-0.917006	0.382126
200924	chr1	45181850	45181999	Stable	1.50568	0.0479912	2.19915	0.00410599	-1.29551	0.116224
200925	chr1	45182100	45185399	Stable	3.51125	1.97168e-05	3.67592	0.00041966	-0.119899	0.892666
200926	chr1	45185850	45185999	Stable	2.77547	0.000236828	3.13174	0.00113668	-0.451843	0.610788
200927	chr1	45186600	45186899	Stable	3.10575	3.4123e-05	2.63116	0.00150222	0.0306907	0.97457
200928	chr1	45208500	45208799	Stable	1.66042	0.0146908	3.65908	0.00507104	-1.3693	0.0692634
200929	chr1	45241600	45242299	Stable	2.91416	5.55519e-05	3.05315	0.00215878	-0.455304	0.524847
200930	chr1	45242600	45243249	Stable	3.18661	3.03187e-05	4.48925	0.000499243	-0.360816	0.618007
200931	chr1	45269000	45269549	Stable	3.15673	3.74963e-05	3.52542	0.000434106	-1.16551	0.0927992
200932	chr1	45269600	45270299	Stable	2.68857	0.000150484	3.03591	0.000901589	-0.344201	0.668101
200933	chr1	45275400	45275549	Stable	1.80238	0.00594858	2.14121	0.00460369	-0.379539	0.608564
200934	chr1	45285900	45286249	Stable	2.06469	0.00066555	2.80906	0.000686602	-0.500066	0.437017
200935	chr1	45286450	45286649	other	0.549138	0.264107	2.64512	0.00148968	-1.08327	0.12129
200936	chr1	45287300	45287849	Stable	2.65762	0.00190701	4.257	0.000428265	-1.03606	0.116717
200937	chr1	45288150	45289399	Stable	3.47085	1.9964e-05	3.5994	0.000436053	-0.304458	0.681129
200938	chr1	45289600	45290149	Stable	3.47396	2.09108e-05	3.80497	0.000472546	-0.356005	0.659809
200939	chr1	45290250	45291199	Stable	3.54139	2.07308e-05	3.69865	0.00041966	-0.380729	0.617116
200940	chr1	45291750	45291999	Stable	2.05816	0.00222913	3.20719	0.00046107	-0.158558	0.879143
200941	chr1	45298250	45298799	Stable	3.32552	3.41512e-05	2.20888	0.00600039	0.617056	0.333703
200942	chr1	45299000	45300899	Stable	3.90914	1.55559e-05	4.15015	0.00041966	0.358972	0.618513
200943	chr1	45301450	45301999	Stable	3.16198	3.28895e-05	2.46624	0.00122113	0.718251	0.24507
200944	chr1	45302700	45302849	other	2.53052	0.000220559	0.578776	0.478293	1.5379	0.147619
200945	chr1	45303150	45303299	Stable	2.35086	0.000350159	1.637	0.0215547	0.511196	0.477261
200946	chr1	45303550	45305649	Stable	3.11567	3.38104e-05	4.24049	0.000421281	-0.22579	0.770994
200947	chr1	45308150	45308449	Stable	2.54637	0.000133267	3.20234	0.000592728	-0.212408	0.780487
200948	chr1	45308500	45313049	Stable	4.55663	1.55559e-05	4.91187	0.00041966	-0.510912	0.442705
200949	chr1	45313100	45316649	Stable	4.20444	1.55559e-05	4.35274	0.00041966	-0.369865	0.597256
200950	chr1	45316850	45316949	Stable	2.3808	0.00140751	2.33828	0.00189281	-0.493209	0.492217
200951	chr1	45318200	45318299	Stable	2.38682	0.000918999	3.04979	0.00147211	0.0941505	0.943048
200952	chr1	45318350	45318449	Stable	2.34973	0.000421203	2.09398	0.00291407	0.182002	0.841988
200953	chr1	45319600	45319799	Stable	2.75958	0.000375326	3.07116	0.00462445	-0.459169	0.500241
200954	chr1	45319900	45320099	Stable	2.05869	0.00174859	3.13964	0.000644434	0.281008	0.738006
200955	chr1	45320800	45321049	Stable	2.29176	0.000359291	2.90017	0.00163712	-0.26547	0.787966
200956	chr1	45321700	45321799	other	2.08985	0.000716677	1.5456	0.0629849	1.29481	0.127196
200957	chr1	45330300	45330399	Stable	1.59292	0.00741561	1.90226	0.00282916	-0.355335	0.6665
200958	chr1	45338600	45338699	Stable	1.27639	0.0157305	2.40613	0.00546666	-1.49485	0.051551
200959	chr1	45353250	45353499	Stable	1.06369	0.0423326	3.42501	0.000930485	-1.24313	0.0780224
200960	chr1	45353750	45353849	Stable	2.67827	0.000459249	1.81998	0.00309736	-0.0641325	0.950204
200961	chr1	45354000	45354099	Stable	1.16508	0.0262423	2.65927	0.00200937	-1.2978	0.059775
200962	chr1	45354550	45354649	Stable	3.62501	1.66694e-05	1.45526	0.0258244	0.935571	0.187273
200963	chr1	45354850	45356149	Stable	3.10972	3.65819e-05	3.80937	0.0004212	-0.933787	0.137292
200964	chr1	45356200	45358299	Stable	3.50162	2.02883e-05	4.45636	0.00041966	-0.507503	0.453788
200965	chr1	45358400	45358799	Stable	1.77665	0.00327714	3.17793	0.000536222	-0.442889	0.574099
200966	chr1	45358950	45359299	Stable	2.14371	0.000611105	2.94589	0.00240062	-0.22541	0.766507
200967	chr1	45449350	45449449	other	2.41916	0.000233775	0.755001	0.140478	0.713843	0.308714
200968	chr1	45471700	45471949	Stable	3.47957	2.69093e-05	2.81702	0.00215878	0.718692	0.324082
200969	chr1	45472100	45472249	Stable	1.97053	0.00113579	2.247	0.00424832	-0.0661487	0.942
200970	chr1	45472350	45472799	Stable	3.46498	1.90085e-05	2.32758	0.00367297	0.610419	0.355884
200971	chr1	45473000	45473399	Stable	3.02685	4.96067e-05	3.104	0.000472196	0.510372	0.425313
200972	chr1	45473500	45473849	Stable	1.77117	0.00255704	2.98888	0.00121834	-0.702901	0.334318
200973	chr1	45479400	45479599	Stable	1.52469	0.0078725	2.42577	0.0042734	-0.510444	0.488969
200974	chr1	45479900	45480199	Stable	3.12902	0.000114723	3.52972	0.00100323	-0.447644	0.673371
200975	chr1	45481300	45481449	other	0.749059	0.164257	2.50526	0.00138118	-0.9861	0.174273
200976	chr1	45500500	45500649	Stable	2.24572	0.000342945	2.98988	0.0201756	-0.467818	0.671698
200977	chr1	45500700	45504349	Stable	4.42489	1.55559e-05	4.66598	0.00041966	-0.213344	0.790207
200978	chr1	45504400	45504599	Stable	2.25545	0.000335353	2.67441	0.00315341	-0.46006	0.505035
200979	chr1	45531200	45531399	other	3.22293	7.67221e-05	1.3904	0.0725808	1.00492	0.282157
200980	chr1	45531850	45532549	HH_sensitive	3.60827	1.70734e-05	1.68935	0.00496228	1.63084	0.0274444
200981	chr1	45532750	45532999	HH_dependent	2.95755	0.000141037	-0.117493	0.843462	1.90482	0.0205432
200982	chr1	45538550	45538849	Stable	3.54917	1.88823e-05	1.90258	0.00277664	0.324844	0.648568
200983	chr1	45539400	45539499	other	2.74038	0.000384	0.450029	0.305716	1.09712	0.102417
200984	chr1	45539850	45542849	Stable	3.9729	1.55559e-05	3.99787	0.00041966	0.000458147	0.999615
200985	chr1	45579950	45580499	Stable	2.50062	0.000429936	3.20542	0.00049416	-0.211557	0.804078
200986	chr1	45581150	45581299	Stable	2.0909	0.00345578	3.05647	0.00154552	-0.263266	0.790207
200987	chr1	45581400	45581599	Stable	2.93056	6.22173e-05	2.25297	0.0014318	0.631592	0.335609
200988	chr1	45596300	45596549	Stable	1.89797	0.00313281	2.72048	0.00081755	-0.775363	0.24596
200989	chr1	45597000	45597799	Stable	3.5249	1.9039e-05	2.94721	0.00106786	-0.123747	0.901038
200990	chr1	45597900	45598099	Stable	2.75051	0.000102184	2.89035	0.00475401	-0.367952	0.639039
200991	chr1	45598250	45598399	Stable	2.57979	0.000154455	2.16478	0.00216221	1.03381	0.136703
200992	chr1	45598550	45599399	Stable	2.26153	0.000335617	3.89811	0.00041966	-0.370762	0.599555
200993	chr1	45599700	45600049	Stable	2.66197	0.000155481	3.29701	0.000757792	0.00749193	0.994892
200994	chr1	45600350	45600449	Stable	1.24456	0.0259446	2.38069	0.00563187	-0.724274	0.364409
200995	chr1	45600900	45601049	Stable	2.01873	0.00124469	2.94682	0.00320474	-0.465373	0.582611
200996	chr1	45625350	45628299	Stable	3.47525	1.91031e-05	4.06209	0.00041966	-0.542602	0.395289
200997	chr1	45646950	45647099	Stable	2.89989	0.000365421	1.31194	0.0290001	0.389567	0.67846
200998	chr1	45671650	45672849	Stable	3.13219	3.88914e-05	3.31061	0.000430937	-0.350787	0.633185
200999	chr1	45673050	45674699	Stable	3.43652	1.957e-05	3.99483	0.00041966	-0.356106	0.611679
201000	chr1	45674950	45675899	Stable	2.91401	5.4562e-05	2.93063	0.000727835	-0.258582	0.741454
201001	chr1	45676800	45676949	Stable	1.64067	0.0172904	3.72034	0.000453876	-0.91925	0.367913
201002	chr1	45680000	45680099	Stable	1.21286	0.0214968	2.78936	0.00465699	-0.624235	0.333983
201003	chr1	45701000	45701099	other	2.56017	0.000138202	1.69357	0.10361	0.531805	0.697442
201004	chr1	45713700	45713849	other	0.936522	0.0666955	2.67502	0.00126924	-0.968399	0.137072
201005	chr1	45723600	45724049	Stable	2.881	7.19474e-05	2.18745	0.00152476	0.748535	0.254236
201006	chr1	45744550	45745199	Stable	3.0971	4.27088e-05	2.24016	0.0016945	0.705222	0.278417
201007	chr1	45745850	45745999	Stable	2.83866	0.000130084	1.69055	0.0100866	0.674828	0.322149
201008	chr1	45754200	45754299	Stable	2.4968	0.000575326	1.2172	0.026606	0.34297	0.620322
201009	chr1	45754600	45754749	other	3.51016	2.40258e-05	0.701383	0.116273	1.11225	0.120681
201010	chr1	45755050	45756899	Stable	4.1329	1.55559e-05	2.75204	0.000666859	0.818088	0.226145
201011	chr1	45757150	45758399	Stable	3.15661	3.13311e-05	2.73111	0.000687179	0.844071	0.179185
201012	chr1	45758550	45758699	Stable	1.9356	0.00157222	2.65391	0.00199416	-0.137804	0.874562
201013	chr1	45759050	45759299	Stable	2.52762	0.000168591	2.36774	0.00285004	0.69804	0.297069
201014	chr1	45759550	45762799	Stable	3.79591	1.56052e-05	3.85194	0.00041966	-0.202465	0.7995
201015	chr1	45763000	45763599	Stable	2.94077	7.72393e-05	3.26038	0.000439314	-0.306231	0.664519
201016	chr1	45763650	45768649	Stable	3.77635	1.56059e-05	3.97291	0.00041966	-0.352033	0.613187
201017	chr1	45768850	45768949	other	2.07745	0.00295586	0.755001	0.140478	1.11227	0.22843
201018	chr1	45794800	45796249	Stable	3.61403	2.03907e-05	3.42955	0.000436842	-0.107819	0.914987
201019	chr1	45825950	45826099	other	2.64219	0.000149795	0.599902	0.555935	1.5166	0.234087
201020	chr1	45836650	45836799	HH_sensitive	2.7267	0.000366629	1.34719	0.0196984	1.71226	0.028962
201021	chr1	45837150	45837399	HH_dependent	3.1038	5.40228e-05	0.989864	0.15847	2.44839	0.0205342
201022	chr1	45838450	45838549	Stable	2.32376	0.000598745	1.43557	0.0476036	0.841245	0.33469
201023	chr1	45838700	45839149	Stable	3.12396	3.85794e-05	1.78714	0.0143547	1.04776	0.11544
201024	chr1	45843050	45843399	Stable	3.32993	2.72365e-05	2.31184	0.00563642	0.548973	0.423273
201025	chr1	45844000	45844199	other	3.13723	0.000176543	0.323741	0.463745	1.49397	0.0534174
201026	chr1	45859900	45860699	Stable	2.97188	5.4562e-05	3.77268	0.00041966	-0.182332	0.821966
201027	chr1	45860900	45861399	Stable	3.18325	5.69199e-05	1.95263	0.00604234	0.499273	0.508727
201028	chr1	45863950	45865599	Stable	3.17426	3.39929e-05	2.97389	0.000639305	0.567799	0.386968
201029	chr1	45865800	45866099	Stable	2.97658	0.000673532	2.60356	0.00176766	0.616278	0.36606
201030	chr1	45867450	45867699	Stable	2.64572	0.000732496	2.46138	0.0038212	-0.390718	0.611556
201031	chr1	45873000	45873099	Stable	2.75334	0.000139393	3.353	0.00149697	-0.599654	0.5458
201032	chr1	45873500	45873849	Stable	1.86925	0.00184651	2.84847	0.000906597	-0.368657	0.638165
201033	chr1	45925200	45926199	Stable	3.05483	3.84429e-05	2.08881	0.00190686	0.611991	0.341312
201034	chr1	46066950	46067049	other	2.49241	0.000585089	1.72455	0.0875769	1.32984	0.100869
201035	chr1	46696450	46696649	Stable	3.18391	5.79413e-05	2.28857	0.00239623	0.74525	0.332357
201036	chr1	46850950	46851049	other	1.33674	0.0140739	0.728806	0.392453	0.596431	0.396962
201037	chr1	46852400	46855399	Stable	4.42223	1.55559e-05	4.30029	0.00041966	-0.121262	0.898923
201038	chr1	46863500	46863649	other	1.02708	0.065311	2.36849	0.00238271	-1.13895	0.127978
201039	chr1	47563550	47563849	Stable	2.68541	0.00136359	3.42048	0.000695101	0.262685	0.735371
201040	chr1	50025350	50025899	Stable	2.5648	0.000209885	2.2613	0.0016456	-0.227088	0.788051
201041	chr1	50962500	50963199	Stable	3.46027	2.3646e-05	3.70047	0.000426195	-0.262422	0.736088
201042	chr1	50971400	50971899	HH_dependent	4.0014	6.1343e-05	0.74298	0.10423	2.21476	0.0120237
201043	chr1	50980550	50980849	Stable	3.68132	1.59016e-05	1.41804	0.0212428	1.23385	0.0934001
201044	chr1	51064800	51064949	Stable	1.90528	0.00155853	1.32316	0.0256555	-0.0131892	0.990401
201045	chr1	51118900	51120299	Stable	2.61459	0.000112382	3.61694	0.000426516	-0.680413	0.270865
201046	chr1	51120950	51121049	ctrlonly	-0.297003	0.565476	1.92971	0.00559754	-1.53569	0.0474246
201047	chr1	51121950	51122049	Stable	2.70702	0.00269315	2.61801	0.00357686	-0.122447	0.94514
201048	chr1	51124750	51125049	Stable	2.55873	0.000612378	2.7898	0.000814657	-1.02738	0.12261
201049	chr1	51125250	51127749	Stable	3.64974	1.75796e-05	3.82265	0.00041966	-0.52001	0.417182
201050	chr1	51216600	51217299	Stable	2.26463	0.000526642	3.11831	0.00053303	-1.08388	0.0970572
201051	chr1	51217550	51217649	other	0.891762	0.130372	2.3872	0.00101609	-0.882769	0.23892
201052	chr1	51236300	51236599	Stable	1.92721	0.00179506	3.94881	0.000453604	-0.0511154	0.961291
201053	chr1	51239150	51239249	other	0.512442	0.370485	2.81714	0.000689134	-0.856434	0.327067
201054	chr1	51239950	51240399	Stable	2.46831	0.000175339	2.62296	0.0016476	0.290199	0.681695
201055	chr1	51242500	51242599	other	1.38326	0.0867154	2.36549	0.00253137	-1.38368	0.294206
201056	chr1	51242850	51243499	Stable	2.44717	0.000266908	3.36896	0.00043973	-0.616433	0.374536
201057	chr1	51243550	51244049	Stable	2.95481	4.87433e-05	2.82662	0.000573926	-0.259816	0.728028
201058	chr1	51250050	51250299	Stable	1.94835	0.00126259	4.13059	0.00146346	-0.387249	0.600615
201059	chr1	51250750	51251049	Stable	2.05858	0.000793591	2.99559	0.00118254	-0.582614	0.385155
201060	chr1	51264050	51265199	Stable	3.0713	4.26363e-05	3.43341	0.0004212	-0.621555	0.322951
201061	chr1	51265500	51266099	Stable	2.12373	0.00051583	3.37892	0.0019456	-0.520141	0.409834
201062	chr1	51288150	51292849	Stable	3.86657	1.55559e-05	4.10982	0.00041966	-0.11311	0.898711
201063	chr1	51292900	51293399	Stable	1.96241	0.000980397	3.26484	0.00211705	-0.138874	0.869975
201064	chr1	51294000	51294099	other	2.40547	0.000996146	1.05036	0.0901479	0.666191	0.322366
201065	chr1	51332950	51334099	Stable	3.06095	4.45216e-05	3.31118	0.000447441	-0.298053	0.695744
201066	chr1	51334200	51335099	Stable	3.23015	4.10771e-05	2.9341	0.000630648	0.31231	0.67205
201067	chr1	51477600	51478349	Stable	3.6886	2.26818e-05	3.17406	0.000475618	-0.0909768	0.92813
201068	chr1	51478600	51479349	Stable	3.8919	1.57077e-05	3.4356	0.000629041	-0.208314	0.807079
201069	chr1	51505250	51505599	Stable	1.95807	0.00107392	2.91135	0.000769146	0.129219	0.878504
201070	chr1	51507500	51507799	Stable	1.95355	0.00125344	3.29541	0.000696548	-0.313725	0.673309
201071	chr1	51509250	51509349	Stable	1.3318	0.0166921	2.10497	0.027241	0.91729	0.369659
201072	chr1	51593900	51594099	Stable	1.47318	0.0106612	2.87805	0.00204102	-1.17013	0.0962033
201073	chr1	51594300	51594449	Stable	1.8207	0.00528672	1.71216	0.00439862	0.158336	0.855618
201074	chr1	51596350	51596999	Stable	3.4229	1.99428e-05	2.31628	0.00132598	0.407871	0.538071
201075	chr1	51689150	51689699	Stable	3.1367	6.09875e-05	1.56806	0.00951093	1.2456	0.111816
201076	chr1	51690100	51690699	Stable	2.84158	8.81428e-05	1.98558	0.0024077	1.12765	0.0982429
201077	chr1	51746650	51748799	Stable	3.04196	7.90085e-05	3.69901	0.00041966	-0.243748	0.770847
201078	chr1	51759100	51759249	other	2.91207	0.000305198	-0.808987	0.088406	1.6624	0.0908141
201079	chr1	51788150	51788399	Stable	2.81682	0.000265587	2.29744	0.0112022	0.334313	0.678491
201080	chr1	51788550	51789649	Stable	3.23993	3.09345e-05	4.14696	0.00041966	-0.827759	0.185077
201081	chr1	51789850	51790799	Stable	2.65566	0.000130277	4.29889	0.000438973	-0.536263	0.414316
201082	chr1	51838000	51838299	Stable	2.40203	0.000943586	2.42713	0.00110829	0.741561	0.319554
201083	chr1	51914750	51915999	Stable	3.69313	1.88431e-05	3.91824	0.00041966	0.146928	0.879487
201084	chr1	52111900	52113749	Stable	3.47573	1.93549e-05	3.68654	0.00041966	-0.294983	0.678013
201085	chr1	52114250	52114449	Stable	2.80174	0.000136002	2.3872	0.00101609	0.305191	0.664411
201086	chr1	52118600	52120199	Stable	3.69307	2.30829e-05	3.44022	0.000459784	0.0323257	0.97665
201087	chr1	52230050	52230149	Stable	1.68314	0.00418841	2.4521	0.00354763	-0.86454	0.208357
201088	chr1	52231450	52233249	Stable	4.25445	1.55559e-05	4.15222	0.00041966	0.22112	0.820192
201089	chr1	52233400	52234249	Stable	3.64551	1.73666e-05	3.26156	0.000530253	0.2134	0.797444
201090	chr1	52253800	52256049	Stable	2.78264	7.75052e-05	3.50117	0.00041966	-0.50815	0.441075
201091	chr1	52263250	52263449	Stable	2.07623	0.00137667	2.77905	0.000727918	-0.446147	0.52201
201092	chr1	52263600	52264199	Stable	2.83775	8.75093e-05	3.35458	0.000519481	-0.155545	0.867506
201093	chr1	52264750	52265449	Stable	2.57231	0.000732304	2.44761	0.000910756	-0.290008	0.708053
201094	chr1	52265500	52265849	Stable	2.22378	0.000666038	3.20363	0.000878589	-0.862747	0.165949
201095	chr1	52265950	52266099	Stable	1.75219	0.00562729	2.27356	0.00189281	-0.775659	0.29375
201096	chr1	52266400	52267049	Stable	2.47344	0.000203454	3.4994	0.000424971	-0.807616	0.208467
201097	chr1	52299000	52299149	Stable	2.08381	0.00312602	1.73252	0.00904381	-0.642172	0.458896
201098	chr1	52471050	52471499	HH_dependent	3.20505	4.80971e-05	-0.0658558	0.885546	1.60795	0.027383
201099	chr1	52499300	52500399	Stable	3.74684	1.86668e-05	3.6349	0.000558486	0.221565	0.804574
201100	chr1	52500600	52501049	Stable	3.74842	3.64288e-05	3.42027	0.000452357	0.929453	0.2033
201101	chr1	52597050	52597499	Stable	2.81552	6.80969e-05	2.25369	0.00316092	0.656361	0.286253
201102	chr1	52598000	52598749	Stable	2.49761	0.000197936	3.36458	0.000447026	0.0554715	0.956299
201103	chr1	52630600	52631299	Stable	3.90963	1.55559e-05	4.0925	0.00041966	-0.0671629	0.943903
201104	chr1	52752550	52752699	Stable	2.00743	0.00224217	1.83569	0.013746	0.120115	0.910542
201105	chr1	52764000	52764249	Stable	1.61069	0.00739155	2.82684	0.00140435	-0.772743	0.308977
201106	chr1	52764350	52764799	Stable	2.6991	8.49827e-05	3.10786	0.000733036	-0.479856	0.512913
201107	chr1	52799100	52799449	Stable	1.76297	0.00363105	2.65487	0.00214971	-0.719336	0.34254
201108	chr1	52799800	52800199	Stable	2.2832	0.000308614	2.26636	0.00176358	-0.728711	0.240668
201109	chr1	52800400	52800549	Stable	2.26744	0.000863094	3.54272	0.00174079	-0.540186	0.408236
201110	chr1	52800800	52800949	other	0.799378	0.15119	2.43328	0.00112418	-0.629119	0.36079
201111	chr1	52816700	52818199	Stable	3.82522	1.7582e-05	3.88659	0.00041966	0.013255	0.990847
201112	chr1	52844200	52844749	Stable	2.74927	7.96589e-05	3.97056	0.00041966	-0.322442	0.646489
201113	chr1	52845100	52845749	Stable	3.84017	1.61853e-05	3.42348	0.000783559	-0.0878133	0.928833
201114	chr1	53296400	53296999	Stable	3.4642	2.49072e-05	2.96008	0.00060114	0.578129	0.368803
201115	chr1	53297200	53297699	Stable	2.86302	0.000125877	3.19942	0.000981712	-0.303694	0.712539
201116	chr1	53313100	53314349	Stable	3.57937	1.79857e-05	3.73718	0.000422747	0.0427854	0.964931
201117	chr1	53351900	53352699	Stable	3.26607	3.47912e-05	3.91672	0.00041966	0.0227703	0.984735
201118	chr1	53353000	53353149	other	2.89104	0.000238485	0.859909	0.287539	1.65965	0.050791
201119	chr1	53757450	53757999	Stable	1.87873	0.00227422	3.45274	0.00043973	-1.13477	0.0824691
201120	chr1	53758250	53758349	Stable	1.30188	0.0232264	2.01737	0.01157	0.278528	0.761602
201121	chr1	53763500	53763599	other	-0.127481	0.791879	1.53363	0.0579256	-0.595644	0.551084
201122	chr1	53773300	53773399	Stable	2.37318	0.000247178	2.12663	0.00279759	-0.830059	0.192913
201123	chr1	53773600	53774999	Stable	3.12964	4.05419e-05	3.75663	0.000438776	-0.476087	0.495218
201124	chr1	53784200	53785249	Stable	2.94344	0.000104886	3.67331	0.000423014	-0.420188	0.582641
201125	chr1	53785400	53785799	Stable	4.31769	3.6221e-05	3.30748	0.000594232	-0.143329	0.880749
201126	chr1	53823600	53824099	Stable	3.38933	0.00010278	2.65823	0.000774282	-0.343418	0.624992
201127	chr1	53824250	53824549	Stable	2.94003	6.91167e-05	3.17045	0.000475319	0.40267	0.553214
201128	chr1	53838000	53839449	Stable	2.36591	0.000246219	3.25724	0.000500711	-0.438404	0.509243
201129	chr1	53846500	53846699	ctrlonly	0.733245	0.180374	2.34672	0.00195333	-1.87878	0.034351
201130	chr1	54128750	54128899	other	0.820741	0.221385	2.98744	0.000982524	-1.31243	0.131085
201131	chr1	54129200	54129399	Stable	3.77953	1.85298e-05	1.7137	0.00479385	0.16035	0.870722
201132	chr1	54250100	54250499	Stable	2.88764	8.5028e-05	2.51677	0.000877054	0.0277746	0.97826
201133	chr1	54250900	54251049	Stable	1.65841	0.00690382	2.39812	0.0129637	-0.271054	0.816388
201134	chr1	54438150	54439649	Stable	3.85607	1.57077e-05	3.81172	0.000423978	-0.0351868	0.973506
201135	chr1	54522900	54523249	ctrlonly	0.785488	0.110499	3.95241	0.00042829	-2.41277	0.00737643
201136	chr1	54524100	54524649	common_ctrlhigh	1.10505	0.0423497	3.17434	0.000508539	-2.23307	0.0157205
201137	chr1	54524900	54525049	ctrlonly	0.149216	0.778195	2.98885	0.005917	-2.49285	0.00776459
201138	chr1	54557150	54557599	Stable	3.39495	5.14244e-05	2.70339	0.00100951	0.169451	0.864873
201139	chr1	54557950	54558349	Stable	2.52049	0.000240484	2.40794	0.000980893	0.194537	0.824426
201140	chr1	54712700	54713049	Stable	2.27665	0.000656224	2.8191	0.000744395	-0.720397	0.247087
201141	chr1	54713500	54713949	Stable	3.24651	2.87219e-05	3.17687	0.000488768	-0.881278	0.182737
201142	chr1	54714100	54714449	other	1.03631	0.0515227	3.29378	0.000430937	-1.2087	0.0675682
201143	chr1	54715000	54715149	ctrlonly	-0.355576	0.492126	3.20162	0.00177413	-2.07192	0.0314423
201144	chr1	54766250	54766399	ctrlonly	-0.116585	0.815761	2.12641	0.00268631	-1.7019	0.0328048
201145	chr1	54827250	54827499	ctrlonly	-0.355576	0.492126	2.58761	0.00148591	-3.61411	0.00334962
201146	chr1	54830150	54830749	common_ctrlhigh	1.24744	0.0180648	3.3209	0.00043096	-1.55238	0.0328534
201147	chr1	54901700	54901849	ctrlonly	-0.216524	0.689777	1.44176	0.0235388	-2.10822	0.0327545
201148	chr1	54905950	54906149	other	0.846226	0.0950206	2.60634	0.000771107	-1.25317	0.0685472
201149	chr1	54906500	54907999	Stable	2.7298	7.77894e-05	3.53624	0.00041966	-0.678391	0.269375
201150	chr1	54910450	54910549	ctrlonly	-1.41679	0.0150806	2.7822	0.00416728	-2.90094	0.00997971
201151	chr1	54911500	54911599	ctrlonly	-0.759823	0.152468	2.75131	0.000618579	-2.13032	0.0147631
201152	chr1	54912400	54912499	other	-0.0102104	0.983918	2.06264	0.00862029	-0.896313	0.268337
201153	chr1	54913250	54914049	Stable	1.94031	0.00102477	3.2271	0.000480951	-1.23407	0.0649551
201154	chr1	54914200	54915099	Stable	2.23207	0.000553236	3.5413	0.00041966	-1.08333	0.118591
201155	chr1	54924100	54924299	ctrlonly	0.118603	0.825295	3.70875	0.000968784	-1.89143	0.0338062
201156	chr1	54924450	54924699	other	0.76802	0.152293	2.76441	0.00174894	-1.5457	0.0560582
201157	chr1	54924800	54926899	Stable	3.25832	2.86506e-05	3.94257	0.00041966	-0.7734	0.24402
201158	chr1	54930650	54930899	Stable	1.56092	0.00895149	2.76379	0.000919401	-1.17459	0.112355
201159	chr1	54949700	54949949	ctrlonly	0.975001	0.0613211	3.31712	0.000476652	-1.89508	0.0190333
201160	chr1	54950350	54950549	other	0.56689	0.337943	3.15531	0.00364867	-1.24635	0.0858971
201161	chr1	54951850	54952049	other	0.749082	0.157921	2.83742	0.000746846	-0.98294	0.17462
201162	chr1	54952300	54952549	Stable	1.66455	0.00329205	2.87558	0.000705445	-1.02422	0.11052
201163	chr1	54960200	54961549	common_ctrlhigh	2.04898	0.000763605	3.99214	0.000455779	-1.68375	0.0256567
201164	chr1	54961700	54962449	ctrlonly	0.203263	0.71357	2.92133	0.000574542	-3.05513	0.00486624
201165	chr1	54962600	54962699	ctrlonly	-0.0677341	0.903651	1.88194	0.00369874	-2.61452	0.00715936
201166	chr1	54964000	54965649	common_ctrlhigh	2.26887	0.000445027	4.18705	0.00041966	-2.11682	0.0128069
201167	chr1	54965850	54967449	common_ctrlhigh	1.83224	0.00249476	4.24462	0.00041966	-2.50666	0.00599183
201168	chr1	54967700	54968199	ctrlonly	-0.810047	0.120345	3.13421	0.000448146	-2.95078	0.00378611
201169	chr1	54968400	54968849	ctrlonly	0.442244	0.351868	3.08549	0.000646604	-2.75129	0.00539332
201170	chr1	54969000	54973349	common_ctrlhigh	2.72973	8.11653e-05	4.50721	0.00041966	-1.83669	0.0176482
201171	chr1	54973950	54974249	ctrlonly	-0.410386	0.39314	3.0246	0.00102657	-2.37215	0.0107119
201172	chr1	54978450	54978649	ctrlonly	-0.454117	0.347923	2.33596	0.00591937	-2.91057	0.00426826
201173	chr1	54978750	54978999	ctrlonly	-1.0934	0.0417679	2.80684	0.00146853	-3.91121	0.001876
201174	chr1	54979100	54979199	ctrlonly	0.381213	0.434065	2.41375	0.0136058	-1.91775	0.0172202
201175	chr1	55026050	55027499	Stable	3.95007	1.56356e-05	4.47858	0.00041966	-0.190738	0.831856
201176	chr1	55027600	55028099	Stable	3.26847	3.97472e-05	3.81961	0.00421171	0.0770451	0.941391
201177	chr1	55051950	55053999	Stable	4.01595	1.59809e-05	4.07374	0.00041966	0.126388	0.900562
201178	chr1	55086500	55088049	Stable	4.16373	1.55559e-05	4.0188	0.000444506	0.121656	0.900744
201179	chr1	55088150	55089299	Stable	3.37791	2.7058e-05	3.68506	0.000421443	-0.379246	0.602853
201180	chr1	55130200	55130349	Stable	2.575	0.000538739	1.03762	0.0440974	0.500812	0.502585
201181	chr1	55130400	55132449	Stable	3.97443	1.61571e-05	4.71195	0.00041966	-0.175589	0.854387
201182	chr1	55159800	55160749	common_ctrlhigh	1.73586	0.00223206	3.30445	0.000434226	-1.53059	0.0323342
201183	chr1	55160800	55161299	Stable	2.95765	0.000145066	2.75771	0.000923536	-0.487383	0.535782
201184	chr1	55161600	55162499	Stable	2.25674	0.000361754	3.00173	0.000773055	-0.802084	0.23408
201185	chr1	55162950	55163049	other	0.479034	0.409605	1.42804	0.034683	-0.474326	0.622919
201186	chr1	55201100	55203399	Stable	3.07806	4.23032e-05	3.74555	0.00041966	-0.461053	0.493061
201187	chr1	55224750	55228849	Stable	3.65632	1.88954e-05	4.22543	0.00041966	-0.442907	0.519818
201188	chr1	55229000	55229099	Stable	1.73496	0.00841302	1.71413	0.00704573	-1.05578	0.224172
201189	chr1	55237300	55237849	Stable	2.44078	0.000272547	3.87719	0.00041966	-0.41385	0.54023
201190	chr1	55237950	55238149	Stable	2.47198	0.000175203	2.68521	0.0053183	-0.305534	0.69426
201191	chr1	55238350	55238499	Stable	1.53397	0.00515645	2.63847	0.000842785	-0.344441	0.614073
201192	chr1	55238850	55239149	Stable	1.53134	0.0107107	2.79168	0.00103687	-0.824686	0.253721
201193	chr1	55865750	55865949	Stable	2.36736	0.00407209	2.15686	0.00427739	-0.0798409	0.953401
201194	chr1	56681150	56681399	Stable	1.08213	0.0419637	2.92074	0.00132065	-1.04357	0.132054
201195	chr1	56681700	56682149	Stable	1.76151	0.00347587	3.46494	0.00041966	-0.397528	0.55672
201196	chr1	56685650	56685899	Stable	1.58649	0.0151402	2.9908	0.00072828	0.0889358	0.921946
201197	chr1	56700900	56700999	other	0.555786	0.275078	2.13278	0.00220942	-0.671094	0.360403
201198	chr1	56966000	56966299	other	0.733428	0.190711	2.84075	0.000961493	-1.09793	0.16423
201199	chr1	56970550	56976099	Stable	4.17794	1.55559e-05	4.38497	0.00041966	-0.220688	0.798268
201200	chr1	57015050	57015199	other	0.47314	0.327987	1.4911	0.0469395	-0.838643	0.317794
201201	chr1	57052300	57052399	Stable	2.08404	0.00106387	2.75438	0.00112759	-0.687319	0.290194
201202	chr1	57052750	57053799	common_ctrlhigh	1.36608	0.0108945	3.82786	0.00041966	-1.92173	0.0169006
201203	chr1	57053950	57054899	common_ctrlhigh	2.01087	0.00103942	3.59279	0.00041966	-1.78899	0.0193813
201204	chr1	57055000	57056549	common_ctrlhigh	1.59047	0.00453969	3.55203	0.00041966	-1.77883	0.0206199
201205	chr1	57056700	57057399	common_ctrlhigh	1.33536	0.0156929	3.19276	0.000456536	-1.46868	0.0421447
201206	chr1	57075700	57075999	Stable	2.70533	8.33644e-05	2.23852	0.00153808	-0.385235	0.564233
201207	chr1	57078450	57079149	Stable	1.54188	0.0058456	3.23672	0.000433567	-0.575444	0.363501
201208	chr1	57079250	57079499	ctrlonly	0.307094	0.535594	2.97324	0.000695086	-1.60122	0.0391671
201209	chr1	57079900	57080199	Stable	2.09602	0.000674838	2.87991	0.000556242	-0.976862	0.120596
201210	chr1	57174450	57174749	Stable	2.06864	0.00108593	2.8669	0.0012488	-1.22421	0.0805122
201211	chr1	57188700	57188899	Stable	2.1988	0.00118664	2.73923	0.000814403	0.728982	0.265564
201212	chr1	57189350	57189749	other	2.61202	0.000117796	1.70916	0.0854281	1.3141	0.119645
201213	chr1	57203200	57203599	ctrlonly	0.775027	0.144127	2.93547	0.00136121	-1.91467	0.0252498
201214	chr1	57203650	57204399	common_ctrlhigh	1.86115	0.00300172	3.34674	0.000458791	-1.68569	0.027996
201215	chr1	57204850	57204949	Stable	1.78038	0.00208832	3.07186	0.00484093	-1.14408	0.0908286
201216	chr1	57205250	57205699	Stable	2.22391	0.000674497	2.88327	0.00139737	-0.730524	0.261285
201217	chr1	57377600	57378249	Stable	3.43717	2.67086e-05	3.37647	0.00126755	0.302151	0.768444
201218	chr1	57405650	57407599	Stable	4.38675	1.55559e-05	4.54143	0.00041966	-0.0114155	0.991757
201219	chr1	57436100	57436849	Stable	2.16492	0.000616855	3.1412	0.00046221	-0.682119	0.277564
201220	chr1	57440200	57440749	ctrlonly	0.879843	0.0760813	3.01165	0.000531851	-1.89299	0.0169542
201221	chr1	57496800	57496949	ctrlonly	0.320712	0.552173	3.88898	0.00041966	-1.62467	0.0317329
201222	chr1	57497100	57497749	ctrlonly	0.353143	0.514885	3.38339	0.000534528	-2.5407	0.011497
201223	chr1	57498050	57498399	ctrlonly	0.923303	0.0824093	3.37456	0.000430937	-1.46504	0.0470037
201224	chr1	57512250	57512399	ctrlonly	-1.18092	0.0760554	2.67382	0.000963438	-3.87785	0.00311375
201225	chr1	57774500	57775449	Stable	3.56199	1.8679e-05	3.65333	0.000771574	0.0754848	0.942105
201226	chr1	57906900	57907049	other	-0.0115144	0.981038	2.12913	0.00192848	-1.17423	0.080091
201227	chr1	57969200	57970099	Stable	4.30867	1.55559e-05	3.88231	0.00041966	-0.0194635	0.986413
201228	chr1	57970300	57970799	Stable	3.26989	8.58742e-05	3.13844	0.000616839	0.236813	0.762571
201229	chr1	57988550	57990049	Stable	2.90021	5.71369e-05	3.39185	0.000423014	-0.743637	0.23204
201230	chr1	57995000	57995949	Stable	2.72935	0.000140256	3.7993	0.00041966	-0.370892	0.65331
201231	chr1	57996100	57996499	Stable	2.6541	0.000185704	2.87423	0.00178418	-0.120804	0.920017
201232	chr1	57996650	57996749	Stable	2.09604	0.0129945	1.91298	0.0043507	-0.813647	0.439007
201233	chr1	57999350	57999499	Stable	2.741	0.000117494	3.34551	0.0017855	-0.995447	0.131858
201234	chr1	58028900	58031099	Stable	3.03919	4.63825e-05	3.52471	0.00041966	-0.707048	0.276984
201235	chr1	58111300	58111599	other	2.91275	5.87642e-05	1.16103	0.0833248	0.624884	0.386968
201236	chr1	58148350	58148499	ctrlonly	0.362352	0.518836	1.72656	0.00660791	-1.85078	0.02221
201237	chr1	58152750	58152949	Stable	1.7928	0.00302111	2.27356	0.00189281	-0.735051	0.249035
201238	chr1	58293450	58293599	HH_dependent	2.53972	0.00287044	-1.2552	0.0183803	2.24804	0.0148561
201239	chr1	58296700	58297649	HH_dependent	3.0224	3.97625e-05	-0.521544	0.211417	3.50044	0.00218994
201240	chr1	58298200	58298899	HH_dependent	3.04474	3.98786e-05	-0.728299	0.297581	3.50837	0.00675771
201241	chr1	58299050	58299449	HH_dependent	2.99107	6.74505e-05	-0.847173	0.222207	3.63258	0.00540587
201242	chr1	58299600	58299799	HH_dependent	2.57899	0.000126278	-0.316076	0.551971	2.929	0.0059413
201243	chr1	58299900	58300249	HH_dependent	3.07526	3.80929e-05	-1.34079	0.0189472	3.94616	0.001876
201244	chr1	58300450	58300999	HH_dependent	2.92281	4.93612e-05	-0.382821	0.369566	2.99926	0.00325575
201245	chr1	58301500	58302899	HH_dependent	3.50241	2.31176e-05	0.360151	0.511109	3.02942	0.00451291
201246	chr1	58302950	58303849	HH_dependent	4.30272	1.55559e-05	1.2343	0.111732	3.17682	0.0101256
201247	chr1	58304050	58306399	HH_dependent	4.37837	1.55559e-05	0.883579	0.0763368	3.19622	0.00416867
201248	chr1	58306700	58306799	HH_dependent	2.51765	0.000259343	-0.0228118	0.976758	3.18466	0.0098245
201249	chr1	58307300	58308099	HH_dependent	3.00675	4.13961e-05	-0.358378	0.383951	3.59314	0.00213067
201250	chr1	58311250	58311649	HH_dependent	2.78703	9.21919e-05	-0.759429	0.35343	3.03465	0.0176482
201251	chr1	58311900	58312049	HH_dependent	3.14695	0.000114057	-1.38096	0.0413568	3.42946	0.00378554
201252	chr1	58312250	58312599	HH_dependent	2.77925	0.000101164	-1.6544	0.00862608	4.22147	0.00193642
201253	chr1	58312850	58313599	HH_dependent	3.19495	3.89313e-05	-1.42079	0.00952153	5.03149	0.00158904
201254	chr1	58313950	58314749	HH_dependent	3.05771	4.45871e-05	-1.22805	0.0223518	4.20371	0.00175345
201255	chr1	58332450	58332699	HH_dependent	2.82708	0.000454908	-0.412841	0.3109	2.46885	0.00808232
201256	chr1	58333000	58333699	HH_dependent	3.34502	3.56879e-05	-0.431572	0.384884	3.20246	0.00404786
201257	chr1	58335800	58336049	HH_dependent	3.11849	5.54499e-05	-0.293108	0.695568	3.49362	0.00332157
201258	chr1	58336100	58336299	HH_dependent	2.76857	0.000131602	0.279718	0.559245	2.26561	0.00813329
201259	chr1	58339850	58340249	HH_dependent	2.81785	8.76691e-05	-2.87573	0.00411277	4.93029	0.00210777
201260	chr1	58340800	58341549	HH_dependent	3.51463	2.14444e-05	0.554661	0.225056	2.49267	0.00701936
201261	chr1	58342050	58342499	HH_dependent	3.12574	3.67594e-05	0.635909	0.536496	2.84171	0.0108779
201262	chr1	58343650	58343749	HH_dependent	2.90542	8.88015e-05	0.600517	0.157306	1.77922	0.0224748
201263	chr1	58352350	58352449	other	0.747052	0.158265	-0.725081	0.401249	1.25303	0.247087
201264	chr1	58352600	58352799	HH_dependent	2.43724	0.000189324	0.892698	0.153614	1.82731	0.0303118
201265	chr1	58353250	58353799	Stable	3.26547	4.72786e-05	1.85282	0.00819755	1.28483	0.10607
201266	chr1	58358250	58360849	Stable	4.1549	1.55559e-05	4.00902	0.000421281	0.314206	0.689507
201267	chr1	58362250	58362599	other	3.38157	2.19743e-05	1.1513	0.20652	1.78184	0.0768331
201268	chr1	58365550	58365799	HH_dependent	2.48192	0.000420581	0.543904	0.360397	1.92665	0.0341076
201269	chr1	58366300	58367799	Stable	3.61521	1.99489e-05	3.49491	0.000524082	0.369881	0.653263
201270	chr1	58391300	58394449	Stable	4.63539	1.55559e-05	4.07625	0.00041966	0.568846	0.456851
201271	chr1	58422950	58424499	Stable	4.4277	1.55559e-05	4.40262	0.00041966	-0.279805	0.736645
201272	chr1	58444500	58446499	Stable	3.68946	1.74477e-05	3.87916	0.00041966	-0.0479739	0.962278
201273	chr1	58446700	58446949	Stable	1.31007	0.0136961	2.75585	0.00123444	-0.472675	0.468975
201274	chr1	58504150	58504949	Stable	2.88362	0.000113312	3.5278	0.000790593	-0.278006	0.786538
201275	chr1	58505250	58505799	Stable	2.66954	0.000111332	3.41707	0.000424885	-0.133351	0.875766
201276	chr1	58585250	58587199	Stable	3.67817	1.73063e-05	3.78956	0.00041966	-0.183676	0.835975
201277	chr1	58609200	58609449	ctrlonly	0.110841	0.825212	3.22929	0.00295033	-1.92104	0.017053
201278	chr1	58614250	58614399	Stable	2.398	0.0007962	2.60831	0.00116065	-0.670394	0.279548
201279	chr1	58614800	58615099	Stable	1.53315	0.00626683	2.23529	0.00172367	-1.06397	0.0970902
201280	chr1	58615500	58615699	ctrlonly	-0.0694204	0.887416	2.56562	0.000995931	-1.57534	0.0316597
201281	chr1	58616300	58616899	ctrlonly	0.666207	0.204885	3.15946	0.000608318	-2.92248	0.00472785
201282	chr1	58650950	58654049	Stable	4.32266	1.55559e-05	4.79384	0.00041966	-0.463963	0.539688
201283	chr1	58654500	58654649	other	0.945141	0.0603472	2.78434	0.00103361	-1.23056	0.0822578
201284	chr1	58660150	58660299	ctrlonly	0.438261	0.367324	2.39421	0.00126797	-1.63448	0.0292683
201285	chr1	58662300	58663449	common_ctrlhigh	2.71139	0.000108033	4.25257	0.00041966	-1.38783	0.0478691
201286	chr1	58663600	58664699	Stable	2.47056	0.000303423	3.43772	0.00045946	-1.16231	0.119337
201287	chr1	58674600	58674799	Stable	1.34569	0.0311703	2.97965	0.00130399	-0.962647	0.209716
201288	chr1	58675350	58676249	Stable	3.37554	2.30963e-05	3.2457	0.000509336	-0.448485	0.492235
201289	chr1	58676400	58676499	other	0.834497	0.103835	2.30563	0.00597498	-0.862231	0.268848
201290	chr1	58677150	58677699	Stable	1.7095	0.00539103	3.26292	0.000440771	-0.931722	0.185824
201291	chr1	58697450	58697649	Stable	2.15844	0.00049667	2.06013	0.0107078	0.550744	0.532607
201292	chr1	58697950	58699649	Stable	3.08889	3.60062e-05	3.54157	0.00041966	-0.375702	0.579433
201293	chr1	58699800	58699949	Stable	2.21339	0.000840109	3.02226	0.00159251	-1.09708	0.0938327
201294	chr1	58700050	58700249	Stable	3.15472	0.000304883	1.83037	0.00481908	-0.221471	0.76854
201295	chr1	58709950	58712799	Stable	4.53328	1.55559e-05	5.08234	0.00041966	-0.279491	0.741739
201296	chr1	58713150	58715099	Stable	4.16902	1.55559e-05	5.01358	0.00041966	-0.42362	0.579686
201297	chr1	58715300	58715699	Stable	1.43843	0.00905046	2.78238	0.00119383	-0.844265	0.231106
201298	chr1	58716200	58716449	other	0.999187	0.054888	2.79674	0.00136363	-1.38717	0.0656628
201299	chr1	58725100	58725999	Stable	2.71227	8.3438e-05	3.9916	0.00041966	-1.05624	0.0994917
201300	chr1	58726050	58727899	Stable	2.26116	0.000437702	3.50297	0.00041966	-1.14623	0.0938568
201301	chr1	58728100	58728649	Stable	1.65417	0.00377185	3.10438	0.00059612	-1.07845	0.125998
201302	chr1	58728850	58729449	other	1.15441	0.0702646	2.75543	0.000669259	-1.79071	0.0641425
201303	chr1	58729650	58729799	ctrlonly	1.32563	0.0910243	2.79694	0.00090875	-1.70626	0.0241409
201304	chr1	58740600	58740699	ctrlonly	1.08694	0.0711235	2.17604	0.00530823	-1.85807	0.0273141
201305	chr1	58741700	58742599	Stable	2.29591	0.000352071	3.96836	0.00041966	-1.2406	0.0866979
201306	chr1	58742750	58744699	Stable	2.35649	0.000354585	3.61575	0.00041966	-1.39361	0.0597555
201307	chr1	58745350	58745599	ctrlonly	0.86329	0.122698	2.72123	0.000998013	-1.83583	0.0363036
201308	chr1	58760250	58760399	ctrlonly	0.599594	0.264304	2.44764	0.00222395	-1.37939	0.0474444
201309	chr1	58760550	58760799	Stable	1.80025	0.0077351	2.33529	0.00124735	-0.665064	0.287841
201310	chr1	58760850	58761249	Stable	2.42638	0.000232689	3.01695	0.00049187	-0.929178	0.15558
201311	chr1	58761600	58762299	Stable	1.90269	0.00149955	3.92119	0.0004222	-0.808342	0.214926
201312	chr1	58770450	58770649	other	1.01572	0.0546094	2.15591	0.00189357	-0.375038	0.58704
201313	chr1	58794800	58796249	Stable	3.95404	1.55559e-05	3.83505	0.00041966	0.0438752	0.966551
201314	chr1	58845650	58845899	Stable	1.06388	0.0461591	3.25656	0.000531281	-1.22627	0.0937813
201315	chr1	58852250	58853199	Stable	1.87678	0.00127909	3.15474	0.000451995	-1.07055	0.0945229
201316	chr1	58853400	58853699	Stable	1.36935	0.0156887	2.755	0.000784179	-1.16272	0.0991803
201317	chr1	58854000	58854199	other	1.12204	0.0698919	2.17443	0.00366099	-1.34582	0.065936
201318	chr1	58854800	58854899	ctrlonly	-0.797115	0.127953	2.17825	0.00213507	-2.66433	0.00473352
201319	chr1	58855250	58856899	Stable	2.89179	7.0821e-05	4.42063	0.00041966	-1.21393	0.0711149
201320	chr1	58857100	58858199	common_ctrlhigh	2.37927	0.000264811	3.90687	0.00041966	-1.57515	0.0342495
201321	chr1	58859600	58859799	Stable	1.62809	0.00927195	2.79772	0.00103727	-1.10772	0.197651
201322	chr1	58897300	58897499	other	1.0114	0.0909587	2.33657	0.00122707	-1.15188	0.108649
201323	chr1	58909950	58910399	Stable	2.30598	0.000394525	2.64973	0.00073547	-0.948978	0.142576
201324	chr1	58945450	58945599	ctrlonly	0.129447	0.799762	2.12876	0.00261317	-1.93175	0.0195602
201325	chr1	58945850	58945999	Stable	1.70679	0.00258531	2.23144	0.001365	-0.749377	0.228219
201326	chr1	58946900	58947099	other	0.220646	0.707662	2.49612	0.00276068	-1.7313	0.0771481
201327	chr1	58950350	58950499	Stable	2.22297	0.000928221	2.6589	0.00365768	-0.638591	0.451184
201328	chr1	58950700	58952099	Stable	2.29825	0.000330163	3.38626	0.00041976	-0.753983	0.225458
201329	chr1	58952200	58953349	Stable	3.03801	3.81373e-05	2.80594	0.000603389	-0.168039	0.8367
201330	chr1	58953550	58953749	Stable	2.16488	0.000537837	2.50245	0.00145833	-0.322553	0.655459
201331	chr1	58972700	58974299	Stable	3.74122	1.71476e-05	4.01358	0.00041966	0.0552142	0.957602
201332	chr1	59119500	59119749	Stable	3.31163	5.67731e-05	2.84495	0.00282298	0.0302934	0.979724
201333	chr1	59119800	59121049	Stable	4.69386	1.55559e-05	4.47593	0.00041966	0.0483125	0.964787
201334	chr1	59162450	59163049	common_ctrlhigh	1.57366	0.0068121	3.18072	0.000444586	-1.58034	0.0289984
201335	chr1	59163200	59163399	other	-0.00839167	0.987253	2.96634	0.00105897	-1.41369	0.0901116
201336	chr1	59163600	59163799	Stable	1.48285	0.0116046	2.47696	0.00237355	-1.05971	0.110772
201337	chr1	59236600	59237849	Stable	3.18495	4.16445e-05	3.53922	0.000536782	-0.00212799	0.998489
201338	chr1	59256100	59256849	common_ctrlhigh	1.39528	0.0115208	3.0782	0.000471615	-1.96798	0.0169621
201339	chr1	59257050	59257399	ctrlonly	0.995975	0.105174	2.86295	0.000999778	-1.85572	0.0282622
201340	chr1	59268850	59270399	common_ctrlhigh	2.07443	0.000641316	3.44384	0.000431983	-1.52339	0.0329362
201341	chr1	59270550	59271499	common_ctrlhigh	1.55249	0.00492388	3.70855	0.00041966	-2.07926	0.0115198
201342	chr1	59316700	59316799	other	1.07981	0.0957493	2.3072	0.0065863	-0.908637	0.167763
201343	chr1	59409650	59409949	Stable	2.21277	0.000377481	2.82869	0.000553608	-0.0648059	0.942964
201344	chr1	59480500	59481899	Stable	4.02878	1.55559e-05	3.91454	0.00041966	-0.0735226	0.938311
201345	chr1	59482150	59483499	Stable	3.44393	2.07582e-05	3.58309	0.000470265	0.0409884	0.967539
201346	chr1	59485150	59485649	Stable	3.14749	3.1131e-05	3.14104	0.00056742	-0.32923	0.657571
201347	chr1	59487900	59488049	Stable	1.26662	0.0176928	2.39165	0.00168872	-0.521902	0.406817
201348	chr1	59627750	59627899	other	-0.628147	0.300291	2.83385	0.00158505	-0.653984	0.536925
201349	chr1	59669600	59671599	Stable	4.06724	1.57708e-05	4.17573	0.00042942	-0.154939	0.872302
201350	chr1	59683900	59686099	Stable	3.61924	1.835e-05	4.11602	0.00041966	-0.332901	0.651575
201351	chr1	59762050	59764249	Stable	4.94168	1.55559e-05	4.72832	0.00041966	0.105761	0.920229
201352	chr1	59764300	59765349	Stable	3.4307	2.02555e-05	4.24635	0.00041966	0.110588	0.898446
201353	chr1	59912300	59914199	Stable	4.10988	1.56052e-05	3.23246	0.000903333	0.919952	0.255353
201354	chr1	59915700	59915849	Stable	1.6168	0.00407203	2.07317	0.00661626	-0.0253172	0.98325
201355	chr1	59930200	59930499	Stable	2.8481	0.000101427	2.43497	0.00155465	-0.14697	0.873236
201356	chr1	59930900	59931199	Stable	2.12383	0.000568825	3.56551	0.000424728	-0.858066	0.192315
201357	chr1	59969600	59969749	Stable	2.94773	6.23539e-05	1.81933	0.0320117	1.80692	0.052304
201358	chr1	59999350	59999599	Stable	1.60888	0.0143268	3.37115	0.000433411	-0.734168	0.235401
201359	chr1	59999750	60001549	Stable	2.90128	5.64253e-05	3.31557	0.000446686	-0.437806	0.513821
201360	chr1	60096600	60096949	Stable	2.73445	8.89045e-05	3.53014	0.000472546	0.125439	0.886434
201361	chr1	60097000	60099249	Stable	3.79099	1.71214e-05	4.11119	0.00041966	-0.200526	0.812569
201362	chr1	60157900	60158649	Stable	2.83412	8.43765e-05	3.4438	0.000540896	-0.577759	0.386585
201363	chr1	60158800	60159149	Stable	2.91211	5.47695e-05	2.72042	0.000995125	-0.12421	0.886434
201364	chr1	60164200	60164399	ctrlonly	0.00895017	0.985766	2.50726	0.00199223	-1.74325	0.0301374
201365	chr1	60179600	60180249	Stable	3.29333	2.55583e-05	3.32534	0.000429557	-0.154062	0.851661
201366	chr1	60180500	60181599	Stable	4.00071	1.57396e-05	3.77924	0.000476335	0.426015	0.604119
201367	chr1	60342550	60344549	Stable	3.81767	1.70248e-05	3.91653	0.00041966	0.056936	0.956092
201368	chr1	60408900	60410599	Stable	4.14263	1.55559e-05	4.05255	0.00041966	0.0363512	0.974194
201369	chr1	60565450	60565649	Stable	2.43576	0.000220975	1.4437	0.0366738	-0.0658721	0.950967
201370	chr1	60565700	60566949	Stable	4.39744	1.55559e-05	3.80055	0.00047876	0.254114	0.766339
201371	chr1	60567000	60567799	Stable	3.18818	4.05188e-05	3.45439	0.000422747	-0.257101	0.751826
201372	chr1	60616450	60616699	ctrlonly	0.427707	0.36837	3.61727	0.00100925	-2.1669	0.0102319
201373	chr1	60617300	60617499	Stable	1.78046	0.00295989	2.70004	0.00164679	-0.714921	0.322142
201374	chr1	60618000	60618149	ctrlonly	0.258382	0.636596	2.77471	0.000898467	-2.22002	0.0167111
201375	chr1	60824250	60824549	common_ctrlhigh	1.30146	0.0145557	3.25445	0.000708762	-1.69768	0.0246634
201376	chr1	60824750	60826699	Stable	2.68939	0.000108513	4.24564	0.00041966	-1.26637	0.0590831
201377	chr1	60826800	60827449	ctrlonly	0.842088	0.107928	3.27365	0.00043218	-2.15267	0.0104242
201378	chr1	60859450	60859699	other	0.72935	0.191337	2.62742	0.0015648	-0.267051	0.79428
201379	chr1	60860050	60860799	Stable	3.33443	2.88325e-05	3.18885	0.00049695	0.309694	0.673646
201380	chr1	62437950	62438099	common_ctrlhigh	1.50478	0.00630156	2.36623	0.00404413	-1.57358	0.0420028
201381	chr1	62443750	62444449	Stable	3.05948	3.7894e-05	2.50967	0.00101483	-0.516478	0.432563
201382	chr1	62444700	62445199	Stable	3.11981	3.80596e-05	3.68441	0.000536095	-0.589701	0.347417
201383	chr1	62445650	62445799	Stable	1.86143	0.0023861	2.96081	0.000784534	0.0610494	0.957791
201384	chr1	62446650	62446799	Stable	1.36492	0.0123456	2.26695	0.00114697	-0.00264418	0.998068
201385	chr1	62447800	62447949	other	0.730223	0.178432	2.20727	0.00189348	-0.436464	0.538879
201386	chr1	62548250	62551699	Stable	2.38215	0.000223406	3.57212	0.00041966	-1.2035	0.0683027
201387	chr1	62551850	62553149	common_ctrlhigh	3.4274	3.07184e-05	4.68544	0.00041966	-1.42198	0.0402348
201388	chr1	62664950	62665849	Stable	3.28247	3.51061e-05	2.70183	0.0011236	0.35749	0.634716
201389	chr1	62666100	62666299	Stable	1.37263	0.0259972	2.82701	0.000669885	0.0498098	0.969497
201390	chr1	62666350	62667049	Stable	3.03203	8.04547e-05	2.19578	0.00243258	0.586473	0.392396
201391	chr1	62678250	62678749	Stable	3.1808	3.35211e-05	2.34104	0.00283572	0.419074	0.589893
201392	chr1	62678800	62679549	Stable	3.22993	2.89678e-05	2.89964	0.000859877	0.281861	0.702824
201393	chr1	62702900	62704399	Stable	2.85267	9.03812e-05	3.3342	0.000424728	-0.187671	0.814488
201394	chr1	62704750	62707849	Stable	3.31209	3.06426e-05	3.94748	0.00041966	-0.173763	0.849841
201395	chr1	62712900	62713199	Stable	1.8735	0.00264156	2.64278	0.00264702	-0.426252	0.533087
201396	chr1	62713250	62713599	Stable	2.21181	0.000673068	3.14401	0.000780405	-0.791096	0.218631
201397	chr1	62715850	62716099	Stable	3.23154	2.97029e-05	1.32434	0.0287747	0.96959	0.158568
201398	chr1	62716750	62716949	Stable	2.50625	0.000188345	2.96418	0.0110388	0.1607	0.873306
201399	chr1	62717250	62722849	Stable	3.41062	2.2219e-05	3.80671	0.00041966	-0.237514	0.755607
201400	chr1	62724200	62724399	Stable	1.68278	0.00437956	2.54959	0.00173826	-0.539531	0.454629
201401	chr1	62732700	62732799	Stable	2.41886	0.00156001	2.02103	0.0245273	0.207888	0.872156
201402	chr1	62735300	62735499	Stable	1.50457	0.0406427	2.98965	0.00061122	-1.91739	0.0628243
201403	chr1	62735900	62736199	Stable	1.68519	0.0057087	2.92827	0.00698169	-0.47708	0.466624
201404	chr1	62736600	62737099	Stable	1.90487	0.00150105	2.91145	0.000564732	-1.31429	0.0534174
201405	chr1	62737300	62737399	other	1.01387	0.132059	2.40767	0.00194566	-1.75284	0.0965367
201406	chr1	62742350	62742449	other	2.39698	0.000848062	0.888551	0.0836583	0.675163	0.436923
201407	chr1	62743050	62743249	Stable	1.90544	0.00456343	3.44161	0.00340049	-0.244649	0.772394
201408	chr1	62743500	62743699	Stable	3.06258	7.61397e-05	2.37415	0.00192845	0.790714	0.258039
201409	chr1	62747750	62748249	Stable	2.59726	0.000160076	3.34315	0.000689023	0.0144949	0.988862
201410	chr1	62749200	62752649	Stable	3.2361	2.84792e-05	3.86408	0.00041966	-0.248452	0.744316
201411	chr1	62753000	62753299	Stable	1.78476	0.0025233	2.38874	0.000950962	-0.452352	0.51487
201412	chr1	62762800	62765149	Stable	2.6518	0.000111991	3.43733	0.00041966	-1.0816	0.0911659
201413	chr1	62766650	62767849	Stable	2.15182	0.000464139	3.20424	0.000444258	-0.814252	0.188158
201414	chr1	62767950	62768599	Stable	2.46548	0.000211543	2.84832	0.000763231	-0.359873	0.622762
201415	chr1	62769350	62769549	Stable	1.50727	0.0221204	1.86704	0.00346007	-0.471049	0.644598
201416	chr1	62770350	62770549	Stable	3.5041	0.000101792	3.48813	0.0019689	0.22837	0.804334
201417	chr1	62770950	62771049	Stable	2.49079	0.000206379	3.11047	0.000947549	0.525067	0.426168
201418	chr1	62771250	62771549	Stable	1.65712	0.00614153	3.2159	0.000532288	-0.254762	0.743419
201419	chr1	62771750	62771899	Stable	2.3444	0.000282224	1.44317	0.0229154	0.81924	0.19983
201420	chr1	62772000	62772149	Stable	3.05562	0.000184203	1.27444	0.0157153	0.461666	0.498428
201421	chr1	62776200	62776299	Stable	1.06182	0.0388392	2.23928	0.0034065	-0.582865	0.404544
201422	chr1	62777150	62777299	Stable	1.5783	0.0113304	3.35227	0.000456777	-0.984632	0.23311
201423	chr1	62791950	62792149	HH_dependent	2.78179	7.16337e-05	0.390155	0.347484	1.57695	0.0302211
201424	chr1	62792950	62793049	Stable	2.44854	0.000254924	2.02555	0.00530417	0.182248	0.845666
201425	chr1	62795850	62795999	Stable	2.19622	0.00186046	1.42883	0.0245024	0.0839426	0.938311
201426	chr1	62823450	62823599	Stable	1.7607	0.00402704	2.62349	0.00290592	-0.0752087	0.947931
201427	chr1	62887700	62887799	other	2.64219	0.000149795	-1.03257	0.281007	1.7769	0.118243
201428	chr1	63112600	63115849	Stable	4.16714	1.55559e-05	4.76996	0.00041966	0.0586338	0.954068
201429	chr1	63115900	63116049	Stable	2.93884	9.82674e-05	3.01418	0.00159012	0.31535	0.746314
201430	chr1	63175800	63178049	Stable	4.19811	1.55559e-05	4.38486	0.00041966	-0.0721115	0.944996
201431	chr1	63178300	63178449	Stable	1.95525	0.00147879	2.53341	0.000947965	0.130814	0.881829
201432	chr1	63182300	63182449	Stable	2.83117	0.000184561	2.04667	0.00236311	0.25225	0.746997
201433	chr1	63198950	63199399	Stable	2.79309	0.00010941	3.16824	0.00111709	-0.290529	0.682479
201434	chr1	63199850	63200299	Stable	2.69842	0.000102387	3.03592	0.000561933	-0.0803054	0.932082
201435	chr1	63202150	63202299	Stable	1.91921	0.00154803	3.03853	0.00533478	-0.813275	0.19838
201436	chr1	63445900	63446499	Stable	3.48394	0.000238609	3.17747	0.000484717	0.160967	0.849046
201437	chr1	63506550	63506699	ctrlonly	-0.631922	0.374644	2.27771	0.00691598	-2.5992	0.0393679
201438	chr1	63507850	63508249	Stable	1.61265	0.00699561	3.22896	0.000446691	-1.31891	0.0718565
201439	chr1	63510850	63510949	ctrlonly	-0.264469	0.65552	1.87032	0.00348386	-2.47614	0.0233511
201440	chr1	63512100	63512599	ctrlonly	0.694324	0.155661	3.30133	0.000720518	-1.84699	0.0213216
201441	chr1	63730000	63731149	Stable	3.69666	1.64337e-05	3.45585	0.000851977	-0.0124014	0.990882
201442	chr1	63731200	63731299	Stable	1.44857	0.00907314	3.0546	0.00388491	-0.183164	0.867534
201443	chr1	63763500	63763599	Stable	1.4	0.02862	2.54109	0.00194999	-0.631641	0.540442
201444	chr1	63763750	63763949	Stable	2.376	0.000330092	2.18615	0.00144157	0.497616	0.466537
201445	chr1	63765800	63766099	Stable	3.03549	6.81022e-05	1.45814	0.0172	1.07626	0.135977
201446	chr1	63766200	63766449	Stable	2.50481	0.000145703	1.39561	0.0168427	0.485262	0.466263
201447	chr1	63766700	63767049	Stable	2.7024	9.4934e-05	1.32455	0.016854	0.884404	0.174355
201448	chr1	63767100	63767249	Stable	2.08414	0.00105768	2.66776	0.000801082	0.268295	0.724425
201449	chr1	63767400	63768149	Stable	3.23216	3.59765e-05	3.69365	0.000499029	0.161425	0.868099
201450	chr1	63768250	63769099	Stable	3.05093	4.3312e-05	3.11271	0.000656383	0.156331	0.853604
201451	chr1	63770150	63770449	HH_sensitive	3.07705	0.000201554	1.39296	0.0336173	1.50937	0.0475247
201452	chr1	63775950	63778049	Stable	3.64384	1.76924e-05	3.8167	0.00041966	-0.31314	0.680393
201453	chr1	63964300	63964549	other	3.40757	3.33139e-05	0.954742	0.103818	1.34767	0.0953553
201454	chr1	64020450	64021049	Stable	4.62265	1.55559e-05	2.76375	0.00736855	0.792608	0.363413
201455	chr1	64088450	64089049	Stable	3.2135	2.83385e-05	3.39905	0.000454836	0.233456	0.768758
201456	chr1	64097850	64097949	Stable	1.8044	0.00169756	2.93906	0.00190686	0.447771	0.487289
201457	chr1	64107100	64107199	ctrlonly	-0.0952016	0.871001	2.32115	0.00608463	-2.2509	0.0244948
201458	chr1	64117850	64121549	Stable	4.54001	1.55559e-05	4.68381	0.00041966	-0.0296553	0.978311
201459	chr1	64121750	64123249	Stable	4.30859	1.55559e-05	4.66196	0.00041966	0.0697713	0.953034
201460	chr1	64123400	64123499	Stable	1.60148	0.00427973	2.36033	0.0151574	-0.132333	0.885344
201461	chr1	64141900	64142649	Stable	3.03957	4.70983e-05	3.70177	0.00041966	0.0902847	0.919916
201462	chr1	64143100	64144049	Stable	2.8018	7.15616e-05	3.15915	0.000695271	0.247628	0.775155
201463	chr1	64187650	64188249	Stable	3.28392	2.70148e-05	1.47521	0.0122634	1.40877	0.0513775
201464	chr1	64208650	64208949	Stable	1.16619	0.0456273	3.31085	0.000451556	-1.20261	0.12956
201465	chr1	64209000	64209149	other	2.65288	0.000156712	1.49148	0.0545066	1.04091	0.190905
201466	chr1	64209650	64209949	Stable	2.40049	0.000398375	3.28657	0.000509637	-0.699358	0.294149
201467	chr1	64221600	64221949	other	3.00598	5.22296e-05	1.21425	0.119353	1.79206	0.0763155
201468	chr1	64222350	64227299	Stable	4.01081	1.55559e-05	3.86028	0.00041966	0.14303	0.872311
201469	chr1	64227450	64228649	Stable	3.37223	2.26837e-05	2.65105	0.00163712	0.25683	0.744974
201470	chr1	64228950	64229049	Stable	2.52448	0.00115517	2.25654	0.00673451	0.433393	0.682517
201471	chr1	64229100	64229399	Stable	2.45707	0.000236248	2.26266	0.0068085	0.098009	0.912917
201472	chr1	64286850	64286999	ctrlonly	-0.873277	0.114762	2.19364	0.00464229	-1.70762	0.0453448
201473	chr1	64287350	64287549	other	0.856321	0.139115	2.39168	0.00141957	-0.744615	0.227592
201474	chr1	64300100	64300249	Stable	1.38949	0.00996198	1.94025	0.0022693	0.0328532	0.973256
201475	chr1	64300400	64302549	Stable	3.86008	1.63893e-05	4.21219	0.00041966	-0.294934	0.68116
201476	chr1	64302750	64303049	Stable	3.02097	4.12805e-05	1.89247	0.010428	0.777471	0.318609
201477	chr1	64304300	64306699	Stable	3.73847	1.63137e-05	4.16636	0.00041966	-0.0615244	0.948569
201478	chr1	64307550	64307649	Stable	2.86164	0.000154242	1.76137	0.0120866	0.220085	0.78146
201479	chr1	64312000	64313599	Stable	3.42748	3.64107e-05	2.79418	0.000648599	0.277027	0.703532
201480	chr1	64316200	64318549	Stable	3.27397	2.59042e-05	2.28783	0.00150411	1.29427	0.0588664
201481	chr1	64318700	64319499	Stable	3.18188	2.92868e-05	3.11032	0.000627794	0.25535	0.730148
201482	chr1	64319550	64319949	Stable	1.96459	0.0020778	2.91255	0.001861	-0.433152	0.650683
201483	chr1	64321250	64321349	Stable	1.99104	0.00232101	3.1925	0.00589811	-1.33135	0.134702
201484	chr1	64321900	64322349	Stable	2.7007	0.00012021	3.47634	0.000611801	-0.683468	0.272211
201485	chr1	64322400	64322999	Stable	1.96536	0.000954796	2.99037	0.000618579	-0.436917	0.501664
201486	chr1	64445800	64445949	Stable	3.32044	0.000126432	1.44921	0.0116115	0.783227	0.208074
201487	chr1	64448500	64448949	Stable	2.51589	0.00021232	2.13278	0.00160854	0.152272	0.86553
201488	chr1	64531650	64534249	Stable	4.20862	1.55559e-05	3.9403	0.00041966	0.123202	0.897242
201489	chr1	64534400	64534549	Stable	2.30953	0.000284055	3.08639	0.00074278	0.241296	0.747647
201490	chr1	64551600	64551699	Stable	2.43513	0.00127612	1.04138	0.0407326	-0.260413	0.820321
201491	chr1	64552350	64552499	Stable	1.79241	0.0127245	2.65676	0.00264487	-1.82122	0.0763434
201492	chr1	64564400	64564799	Stable	2.27651	0.000407945	2.42615	0.000906597	-0.156093	0.86005
201493	chr1	64565350	64565599	Stable	3.27049	2.52585e-05	2.80128	0.00175205	0.0449342	0.965085
201494	chr1	64566250	64566399	other	2.44539	0.000199503	0.71153	0.231153	0.70933	0.373078
201495	chr1	64599950	64600099	Stable	2.35921	0.000329626	2.81609	0.000624458	-0.476061	0.459666
201496	chr1	64600300	64601499	Stable	2.89144	0.000136462	3.74575	0.00041966	-0.822794	0.20034
201497	chr1	64601750	64601849	Stable	1.51603	0.00673357	2.70644	0.00226573	-0.788824	0.245298
201498	chr1	64602000	64602299	Stable	2.28361	0.000325189	3.57495	0.000563453	-1.00858	0.122066
201499	chr1	64614600	64619249	Stable	4.32226	1.55559e-05	4.55907	0.00041966	-0.109121	0.911891
201500	chr1	64619900	64623949	Stable	3.30718	2.60302e-05	4.09765	0.00041966	-0.743845	0.256136
201501	chr1	64624000	64625199	Stable	2.03199	0.00105575	3.61715	0.000718837	-1.01479	0.14108
201502	chr1	64625300	64625549	ctrlonly	0.654663	0.26141	2.54922	0.00148687	-1.81191	0.0250884
201503	chr1	64648750	64651049	Stable	3.55153	2.44126e-05	4.13898	0.00041966	-0.4364	0.541982
201504	chr1	64666300	64666399	other	-0.0158257	0.974129	2.24149	0.0015607	-1.1836	0.0870126
201505	chr1	64667000	64667199	Stable	1.41755	0.0100446	2.27706	0.00120657	-0.644411	0.320995
201506	chr1	64667850	64667999	Stable	1.21417	0.030684	2.07286	0.00662446	-0.589298	0.430721
201507	chr1	64690000	64690099	other	0.237269	0.615177	2.1546	0.0204986	-1.29082	0.05925
201508	chr1	64691000	64692099	Stable	3.73571	2.39475e-05	3.65472	0.000808216	0.115824	0.909675
201509	chr1	64716100	64716199	other	1.67344	0.00549523	-0.0880059	0.943182	1.42498	0.366624
201510	chr1	64736350	64737749	Stable	3.91336	1.63727e-05	4.09769	0.000447459	0.276294	0.75101
201511	chr1	64738050	64738499	Stable	2.65087	0.000190764	2.36231	0.00459519	0.25624	0.794624
201512	chr1	64738600	64738949	Stable	3.36327	2.6191e-05	2.16006	0.0027001	0.392481	0.564676
201513	chr1	64744550	64744649	Stable	2.69904	0.00106591	1.90701	0.0164189	1.23318	0.0878169
201514	chr1	64757800	64757949	HH_dependent	2.55705	0.000252342	-0.149801	0.723678	1.60742	0.047124
201515	chr1	64787750	64787899	Stable	2.53428	0.000400979	1.34761	0.0131132	0.908736	0.161576
201516	chr1	64790300	64790449	Stable	2.4694	0.000793584	2.32391	0.00424832	-0.111346	0.908159
201517	chr1	64790650	64790749	Stable	2.30528	0.000646815	2.07628	0.00650247	-0.0123595	0.991912
201518	chr1	64790800	64792499	Stable	2.88141	5.37301e-05	3.15996	0.000447472	-0.106825	0.900708
201519	chr1	64792600	64792899	Stable	2.29529	0.000308952	3.63831	0.00137873	-0.359759	0.603838
201520	chr1	64793200	64793799	Stable	3.82336	4.77405e-05	2.3223	0.00375454	0.394771	0.61627
201521	chr1	64795000	64795899	Stable	2.74536	8.95794e-05	2.98278	0.00059711	0.168009	0.847604
201522	chr1	64796300	64796399	Stable	1.36204	0.0105354	2.82456	0.000884472	-0.700946	0.258214
201523	chr1	64797050	64797349	Stable	3.37764	2.56541e-05	2.5598	0.00239796	0.293361	0.757446
201524	chr1	64797550	64797699	Stable	2.55566	0.000420021	2.89189	0.00816432	1.0416	0.194625
201525	chr1	64798400	64798549	Stable	2.3754	0.000281127	2.33698	0.00349389	0.775638	0.265577
201526	chr1	64799900	64799999	other	2.11991	0.000629826	0.507485	0.610326	1.37519	0.261137
201527	chr1	64804350	64807899	Stable	3.24358	3.22543e-05	3.19083	0.000443988	0.414797	0.526912
201528	chr1	64808200	64809299	Stable	3.22018	3.02261e-05	3.72093	0.000424728	-0.0907223	0.921374
201529	chr1	64809450	64810949	Stable	3.24971	2.59921e-05	2.67036	0.000808893	0.534756	0.39521
201530	chr1	64813650	64815049	Stable	3.50422	1.79552e-05	2.98619	0.000805595	-0.112948	0.895787
201531	chr1	64824900	64825049	Stable	2.13068	0.000608905	2.20257	0.00470012	-0.126276	0.904546
201532	chr1	64825400	64826349	Stable	3.363	2.20486e-05	3.30774	0.00045762	0.150116	0.856355
201533	chr1	64826500	64827699	Stable	2.86692	6.47532e-05	2.94473	0.00050726	-0.1811	0.825864
201534	chr1	64839600	64840999	Stable	3.40421	2.23564e-05	2.7438	0.00075937	0.414339	0.532411
201535	chr1	64841300	64842799	Stable	3.55851	2.15872e-05	3.43354	0.000702127	0.775502	0.212337
201536	chr1	64842950	64844799	Stable	3.50385	1.91682e-05	2.43834	0.000959808	0.941081	0.134631
201537	chr1	64845000	64845499	Stable	2.58094	0.000231148	1.93918	0.00254683	0.79715	0.245582
201538	chr1	64849900	64850799	HH_dependent	3.16265	3.44059e-05	1.16582	0.05939	1.65186	0.0474474
201539	chr1	64851100	64851349	HH_dependent	2.96098	0.000135912	-0.211912	0.599692	2.96431	0.00329528
201540	chr1	64851550	64852499	Stable	3.16662	4.3677e-05	2.49178	0.00260027	1.23774	0.0633935
201541	chr1	64852800	64853099	Stable	3.12863	3.18746e-05	2.14244	0.0199865	0.462475	0.53278
201542	chr1	64853550	64853949	Stable	2.44584	0.000289416	2.20752	0.00147042	0.0773987	0.931288
201543	chr1	64854000	64854149	Stable	2.28304	0.000512317	2.04508	0.00798514	0.229069	0.802368
201544	chr1	64854400	64854649	Stable	2.52023	0.000374744	1.95997	0.00309754	0.257953	0.760719
201545	chr1	64855750	64855999	Stable	2.90999	0.00023231	1.67068	0.0199165	0.945877	0.202866
201546	chr1	64858800	64858949	Stable	2.19982	0.000798824	2.67793	0.00582205	0.132166	0.879438
201547	chr1	64859350	64860249	Stable	3.21887	3.40413e-05	3.15042	0.000578801	0.0732182	0.936685
201548	chr1	64860350	64860599	Stable	3.14085	5.55258e-05	2.65737	0.0132002	0.814272	0.19325
201549	chr1	64860800	64861249	Stable	2.51464	0.000243885	3.02089	0.00132455	0.168565	0.854332
201550	chr1	64875600	64875849	Stable	2.27292	0.00043432	2.5317	0.00101379	-0.291719	0.682421
201551	chr1	64875900	64877049	Stable	2.81331	7.35033e-05	3.23067	0.000639103	-0.201472	0.807046
201552	chr1	64888200	64888449	other	3.10178	7.00102e-05	1.0778	0.0563468	0.391567	0.568732
201553	chr1	64904950	64905049	HH_dependent	2.42839	0.000538813	-1.86098	0.00867138	3.12403	0.0073071
201554	chr1	64907600	64907899	HH_dependent	3.14142	5.64416e-05	0.157269	0.728298	2.31881	0.00901496
201555	chr1	64916050	64916249	HH_dependent	2.5302	0.000882137	0.924453	0.125228	1.50983	0.0379807
201556	chr1	64916450	64916649	other	2.23601	0.000395457	0.645394	0.260903	1.5846	0.0582788
201557	chr1	64917000	64917449	Stable	3.69939	3.8308e-05	2.79211	0.000784128	0.710451	0.290443
201558	chr1	64918000	64919099	Stable	3.21426	2.95873e-05	2.82206	0.000560494	0.411358	0.53986
201559	chr1	64919150	64919649	Stable	3.01115	4.57712e-05	3.13144	0.000787782	0.604796	0.334769
201560	chr1	64929950	64930249	ctrlonly	0.88551	0.0749027	3.34106	0.000424971	-1.43177	0.0406742
201561	chr1	64956100	64957349	Stable	3.64522	1.75796e-05	3.45754	0.00041966	-0.0440864	0.963638
201562	chr1	64994250	64994599	Stable	3.11966	5.54674e-05	2.73794	0.00101221	-0.252572	0.792877
201563	chr1	65091400	65091549	Stable	1.80779	0.00434785	1.92153	0.00561084	-0.671157	0.343246
201564	chr1	65112350	65112599	Stable	3.17093	0.000120421	2.12348	0.00912842	0.613766	0.33268
201565	chr1	65177200	65177449	Stable	2.05044	0.000936361	3.20077	0.000455123	-0.173764	0.830263
201566	chr1	65177800	65178299	Stable	3.6053	2.34881e-05	2.67122	0.00066032	-0.382974	0.565834
201567	chr1	65178500	65179149	Stable	4.39639	1.55559e-05	3.96042	0.000523333	0.512977	0.486592
201568	chr1	65179300	65179999	Stable	3.6438	1.75529e-05	3.47174	0.000455848	0.147792	0.867241
201569	chr1	65185650	65186549	Stable	4.00646	1.55559e-05	3.35939	0.000445523	0.339447	0.626982
201570	chr1	65186650	65187649	Stable	3.27511	3.76036e-05	4.04082	0.00041966	0.0653881	0.948952
201571	chr1	65204100	65204299	HH_dependent	2.35123	0.000278985	-1.08683	0.08056	3.02604	0.00634639
201572	chr1	65205300	65205549	HH_dependent	2.83789	8.76471e-05	-0.951537	0.14533	3.98582	0.0026389
201573	chr1	65245150	65245399	other	2.79906	6.73254e-05	2.18919	0.0572676	0.830867	0.252296
201574	chr1	65246250	65246749	Stable	1.75123	0.00247198	3.44095	0.000478263	-0.469176	0.486604
201575	chr1	65388850	65389249	ctrlonly	1.12829	0.0836604	4.00252	0.00041966	-2.01996	0.0170976
201576	chr1	65389350	65389649	common_ctrlhigh	1.5179	0.00690573	2.80485	0.000944638	-1.37457	0.0476746
201577	chr1	66700400	66700649	Stable	3.09417	0.000149617	1.36796	0.0220837	0.780333	0.304219
201578	chr1	66700850	66701849	Stable	3.26681	4.33879e-05	3.61251	0.000425095	-0.0398464	0.969554
201579	chr1	66815350	66816999	Stable	3.63542	1.71312e-05	4.57787	0.00041966	-0.263981	0.729616
201580	chr1	66817150	66817549	Stable	3.39806	4.17966e-05	5.35222	0.000422747	0.150559	0.895842
201581	chr1	66817800	66818149	Stable	2.71568	9.46891e-05	3.43821	0.000500711	0.397562	0.550961
201582	chr1	66838200	66838499	Stable	3.40774	4.30256e-05	2.489	0.00156394	0.3469	0.61035
201583	chr1	66845900	66846049	Stable	2.7841	0.000188513	2.18811	0.0194393	0.377708	0.641804
201584	chr1	66846300	66846799	Stable	2.79236	0.000111398	2.1139	0.00151123	0.353525	0.604394
201585	chr1	66862000	66863449	Stable	3.80292	1.59795e-05	3.82586	0.00041966	0.211348	0.799918
201586	chr1	67038200	67038849	Stable	2.83653	8.7843e-05	3.48508	0.000480413	-0.196194	0.832874
201587	chr1	67039000	67039249	Stable	3.22214	4.23075e-05	2.52895	0.00158845	-0.121987	0.895815
201588	chr1	69242000	69242399	Stable	3.88374	1.63137e-05	2.93795	0.000550679	0.515866	0.471577
201589	chr1	69277150	69277249	Stable	3.36279	0.000171981	1.34606	0.0276129	0.775525	0.341864
201590	chr1	69277850	69277949	Stable	3.72155	5.21418e-05	1.95766	0.0098773	0.825068	0.445301
201591	chr1	69343200	69343349	other	0.628221	0.201549	2.97038	0.000582399	-0.894472	0.178715
201592	chr1	69375700	69375849	Stable	2.25508	0.000661343	1.95031	0.00414863	0.573311	0.364647
201593	chr1	69461050	69461149	Stable	1.66304	0.00469363	2.1174	0.00188108	-0.604445	0.363099
201594	chr1	69610250	69610649	Stable	2.2011	0.000458315	2.71661	0.00109866	-0.206867	0.817494
201595	chr1	69611050	69611199	Stable	1.88616	0.00196575	2.15466	0.00278196	0.0413992	0.968425
201596	chr1	69611450	69611549	Stable	1.92567	0.00204722	1.81998	0.00309736	0.0487011	0.964849
201597	chr1	69654850	69655299	Stable	2.01663	0.000913329	3.35161	0.000447837	-0.866957	0.168395
201598	chr1	69655800	69655999	Stable	1.76707	0.0200969	2.28352	0.00447038	-1.27343	0.0662394
201599	chr1	69684300	69684549	other	2.64218	0.000324884	0.715057	0.279662	1.26623	0.0598581
201600	chr1	69684800	69684899	Stable	1.61355	0.00377135	2.07737	0.00172367	-0.120871	0.886403
201601	chr1	69685400	69685899	Stable	3.13952	4.92289e-05	3.40984	0.000469358	-0.0557811	0.959122
201602	chr1	69686300	69687349	Stable	3.46795	2.16963e-05	3.15598	0.000519656	-0.00754373	0.994489
201603	chr1	69687500	69688049	Stable	3.18689	4.98869e-05	3.20481	0.000522893	-0.0410485	0.968666
201604	chr1	70918900	70918999	other	0.354404	0.480109	1.95192	0.0209573	-1.30273	0.0613961
201605	chr1	71003900	71004249	Stable	2.86396	0.000176318	3.1828	0.000855833	-1.49439	0.0592359
201606	chr1	71100200	71100799	Stable	3.00752	4.09333e-05	2.75805	0.000870725	-0.0151332	0.988778
201607	chr1	71100850	71100999	Stable	2.78447	9.52006e-05	1.74774	0.0105259	-0.087031	0.922668
201608	chr1	71101950	71102899	Stable	2.83585	6.87198e-05	2.73242	0.00144603	0.431038	0.574166
201609	chr1	71103250	71103649	Stable	2.86673	6.55331e-05	2.46749	0.00335343	0.347554	0.68003
201610	chr1	71505650	71505899	Stable	2.93992	0.00110693	1.74933	0.0210175	0.354001	0.682644
201611	chr1	71556500	71557899	Stable	3.54353	2.40846e-05	3.59549	0.000484729	0.00656274	0.99564
201612	chr1	71649000	71649149	Stable	3.10877	4.35234e-05	2.1397	0.00386607	0.283751	0.694823
201613	chr1	71649550	71649699	Stable	1.49363	0.0109579	2.04158	0.0108192	0.0272172	0.984874
201614	chr1	71649750	71649899	Stable	3.15567	0.000182104	1.90786	0.00247021	-0.11968	0.888794
201615	chr1	71649950	71655699	Stable	4.20233	1.55559e-05	4.41524	0.00041966	-0.220072	0.789451
201616	chr1	71664300	71664399	other	2.0041	0.0012256	0.837818	0.161903	0.555888	0.531825
201617	chr1	71671750	71672249	Stable	3.276	5.84629e-05	1.44862	0.0215078	1.09367	0.111961
201618	chr1	71673400	71673749	Stable	3.89094	1.56052e-05	1.96295	0.00653329	0.883532	0.221773
201619	chr1	71679250	71683099	Stable	3.49875	1.83383e-05	3.1719	0.000458049	0.0572811	0.951285
201620	chr1	71683250	71683349	other	0.799378	0.15119	2.99243	0.00178931	-0.947157	0.154774
201621	chr1	71683700	71683899	Stable	2.33203	0.000725513	2.2643	0.0025605	0.206178	0.81657
201622	chr1	71683950	71684049	Stable	1.40317	0.0129764	3.68364	0.00063073	-0.36508	0.686103
201623	chr1	71686600	71686749	Stable	1.484	0.0165272	3.45886	0.000530253	-0.350854	0.62726
201624	chr1	71689350	71689599	other	-0.0202457	0.978169	2.18734	0.00197453	-1.84911	0.102452
201625	chr1	71691600	71692499	Stable	2.44159	0.000272122	3.74071	0.000449971	-0.318192	0.677864
201626	chr1	71749500	71749699	Stable	3.14025	0.00120003	1.99472	0.00465369	0.488107	0.506837
201627	chr1	71749950	71752399	Stable	3.18164	3.05883e-05	3.92747	0.00041966	-0.441931	0.505695
201628	chr1	71752450	71756849	Stable	3.65528	1.63029e-05	4.2374	0.00041966	-0.205343	0.795127
201629	chr1	71756950	71758249	Stable	2.88422	5.46256e-05	2.62575	0.00101609	-0.0720408	0.940908
201630	chr1	71759400	71759499	Stable	1.5989	0.00840494	1.87259	0.0107263	-0.214103	0.804709
201631	chr1	71759750	71761149	Stable	3.05501	3.88513e-05	2.94057	0.000716418	0.112477	0.902616
201632	chr1	71761450	71765349	Stable	3.94143	1.55559e-05	3.87686	0.00041966	-0.0611947	0.950056
201633	chr1	71766600	71767249	Stable	1.97816	0.00101319	3.34129	0.000441807	-0.88669	0.153403
201634	chr1	71767700	71767999	Stable	2.45913	0.000311665	2.63188	0.00164442	0.142577	0.879289
201635	chr1	71768100	71768449	Stable	1.89042	0.00129148	3.14465	0.00075382	-0.538254	0.406874
201636	chr1	71768550	71768699	Stable	2.2804	0.000490564	2.67727	0.00212049	0.487872	0.545894
201637	chr1	71769600	71769699	Stable	2.32752	0.00119316	1.76714	0.0217275	-0.270476	0.741578
201638	chr1	71770000	71770099	Stable	2.72459	7.98886e-05	1.30839	0.0178566	0.619077	0.345099
201639	chr1	71771300	71772949	Stable	2.84108	6.26824e-05	3.14048	0.000478005	0.122687	0.886748
201640	chr1	71773100	71773499	Stable	2.47217	0.000161321	2.86238	0.000648239	0.142738	0.863098
201641	chr1	71773550	71773649	Stable	1.71814	0.00608319	1.67931	0.0120909	-0.0184491	0.989109
201642	chr1	71787850	71787999	Stable	2.21129	0.00042029	2.15469	0.00540232	0.657569	0.320637
201643	chr1	71788550	71788949	Stable	2.64928	0.000142075	3.14625	0.00152592	-0.284132	0.783436
201644	chr1	71798300	71798449	HH_sensitive	2.15066	0.000714903	1.3426	0.0122625	1.44116	0.0399539
201645	chr1	71799250	71799449	Stable	3.74869	1.82299e-05	1.40124	0.0307149	1.31745	0.0572037
201646	chr1	71799500	71801799	Stable	3.51228	1.92325e-05	3.35666	0.000421443	0.441033	0.510099
201647	chr1	71801950	71802449	Stable	2.15492	0.000609976	3.04767	0.00142266	-0.0126165	0.99011
201648	chr1	71802900	71802999	other	0.804282	0.128702	2.04847	0.00285536	-0.901547	0.189532
201649	chr1	71803200	71803399	Stable	2.93587	8.95794e-05	2.59835	0.00352942	-0.275999	0.701758
201650	chr1	71804400	71804649	Stable	2.06764	0.00136613	3.64205	0.00705584	-0.915576	0.144845
201651	chr1	71804850	71804949	other	0.741723	0.151855	2.56912	0.00244051	-0.990394	0.162126
201652	chr1	71805950	71807749	Stable	3.14562	3.13883e-05	4.32755	0.00041966	-0.646081	0.297277
201653	chr1	71807900	71809549	Stable	3.38477	2.19915e-05	4.39772	0.00041966	-0.951361	0.15243
201654	chr1	71809950	71810099	Stable	2.62846	0.000114109	1.56983	0.00860771	-0.443145	0.534463
201655	chr1	71812100	71812249	Stable	1.12566	0.0369729	2.77981	0.00168593	-0.739987	0.356836
201656	chr1	71812500	71812649	Stable	2.34563	0.000283936	2.53599	0.00214756	-0.0671669	0.945894
201657	chr1	71812850	71813149	Stable	1.66363	0.00565585	1.95013	0.00234846	-0.511978	0.428814
201658	chr1	71813700	71817449	Stable	3.16336	3.16043e-05	3.81579	0.00041966	-0.431424	0.511498
201659	chr1	71831250	71831449	other	0.908621	0.0914865	2.54806	0.00207699	-1.34906	0.076926
201660	chr1	71831800	71831949	other	0.837498	0.113902	2.59471	0.0130962	-0.765947	0.334845
201661	chr1	71844950	71845049	other	1.02542	0.0510823	2.23932	0.0169711	-0.311539	0.660695
201662	chr1	71845250	71845599	Stable	1.82767	0.00184281	2.69787	0.000810752	-1.14764	0.090313
201663	chr1	71850650	71850899	Stable	2.27252	0.00032232	2.59892	0.00131586	-0.136164	0.884259
201664	chr1	71850950	71851049	Stable	2.52887	0.00060234	2.31352	0.00114925	-0.310347	0.750243
201665	chr1	71855100	71855199	other	2.18415	0.000592169	1.32212	0.0617315	0.606131	0.417684
201666	chr1	71865050	71866849	Stable	2.53103	0.000139607	3.88768	0.000509803	-0.50542	0.42857
201667	chr1	71876250	71876649	Stable	3.2823	0.000278018	1.90417	0.0097803	0.608417	0.398381
201668	chr1	71876800	71877949	Stable	3.14174	4.57768e-05	2.83751	0.000977017	0.281391	0.704319
201669	chr1	71880050	71882049	Stable	3.37501	2.26985e-05	3.62023	0.00041966	-0.479224	0.458016
201670	chr1	71882450	71882549	Stable	1.31118	0.0410447	3.09456	0.00256844	-0.636363	0.545198
201671	chr1	71883450	71883549	ctrlonly	-0.367557	0.492028	1.87638	0.0114753	-1.99409	0.0450629
201672	chr1	71884000	71884299	Stable	1.84338	0.0017114	3.10956	0.000503484	-0.601411	0.353662
201673	chr1	71884350	71884849	Stable	3.07003	4.4238e-05	2.00494	0.00278453	-0.233415	0.773248
201674	chr1	71885100	71885199	Stable	1.41219	0.0163133	2.53272	0.00103687	-1.22988	0.0789894
201675	chr1	71885650	71885799	Stable	2.56128	0.000124437	1.92745	0.00359669	-0.0502062	0.960184
201676	chr1	71885900	71889349	Stable	3.57556	1.94141e-05	3.66901	0.00041966	-0.398696	0.551689
201677	chr1	71889550	71889699	Stable	1.83712	0.00203646	2.33755	0.00136044	-0.563342	0.429887
201678	chr1	71889900	71890549	Stable	2.37484	0.000226301	3.23308	0.000444506	-0.707426	0.251317
201679	chr1	71890650	71896899	Stable	3.63942	1.70003e-05	4.04448	0.00041966	-0.416471	0.543549
201680	chr1	71897100	71899049	Stable	2.8872	5.48603e-05	3.3424	0.000437694	-0.0930926	0.917837
201681	chr1	71900100	71900799	Stable	3.58976	1.66199e-05	2.59085	0.00101609	0.139535	0.866385
201682	chr1	71902900	71903099	other	3.67141	1.87138e-05	0.504694	0.228723	0.900051	0.149497
201683	chr1	71903950	71905499	Stable	3.27331	2.67837e-05	3.13548	0.000521304	0.412877	0.547518
201684	chr1	71905800	71905999	Stable	2.28616	0.000412105	1.39882	0.0213148	0.814904	0.261522
201685	chr1	71906050	71907149	Stable	3.14797	3.17106e-05	2.87807	0.00201441	0.415489	0.53856
201686	chr1	71907200	71907399	Stable	2.09665	0.000598731	2.26153	0.00132438	0.16297	0.844745
201687	chr1	71908350	71911099	Stable	4.11267	1.55559e-05	3.88228	0.00041966	-0.0742281	0.935607
201688	chr1	71911250	71914599	Stable	3.57555	1.72069e-05	4.22154	0.00041966	-0.413938	0.53978
201689	chr1	71915100	71924599	Stable	3.22368	2.7622e-05	4.00995	0.00041966	-0.760051	0.221351
201690	chr1	71924700	71925299	Stable	1.96607	0.000954446	3.17325	0.000562221	-0.49509	0.464738
201691	chr1	71925500	71925899	Stable	1.87502	0.00271216	2.73141	0.000758573	-0.805107	0.196643
201692	chr1	71926250	71926349	Stable	2.22455	0.00285519	2.51393	0.00175978	-0.479324	0.521035
201693	chr1	71935700	71935799	Stable	1.84357	0.00833051	2.68125	0.000822714	0.138884	0.916216
201694	chr1	71936100	71939349	Stable	2.88425	6.52895e-05	3.72366	0.00041966	-0.71117	0.252564
201695	chr1	71939600	71939949	Stable	1.83096	0.00225665	2.98224	0.000749719	-1.08371	0.10344
201696	chr1	71940400	71940549	other	1.19247	0.0674119	2.69544	0.000646791	-0.954105	0.280177
201697	chr1	71940750	71940899	Stable	1.45045	0.00876213	2.31003	0.00116529	-0.974488	0.130002
201698	chr1	71941800	71942099	Stable	1.41571	0.0094663	3.13945	0.000949638	-0.844758	0.230522
201699	chr1	71942800	71942949	Stable	1.61886	0.00889566	2.61055	0.00376487	-0.476076	0.577896
201700	chr1	71943300	71943499	other	0.921385	0.0777692	3.14564	0.000650748	-1.1388	0.0889161
201701	chr1	71943600	71946799	Stable	3.0362	4.41671e-05	3.89651	0.00041966	-0.60903	0.34699
201702	chr1	71947150	71947699	Stable	2.81021	6.83639e-05	3.17277	0.00045762	-0.266719	0.717763
201703	chr1	71947900	71948049	Stable	2.04726	0.000810814	1.54609	0.0474089	0.829015	0.368101
201704	chr1	71951500	71951749	Stable	2.34849	0.000665789	2.41963	0.0100207	-0.172653	0.841857
201705	chr1	71952450	71952649	Stable	1.86966	0.0112735	2.83909	0.000641781	-0.678111	0.391783
201706	chr1	71952700	71952799	other	2.55514	0.00146992	1.30783	0.0727146	-0.0150492	0.988862
201707	chr1	71953000	71954049	Stable	2.20755	0.000393644	3.34766	0.000443588	-0.53439	0.396825
201708	chr1	71954750	71954949	Stable	2.22426	0.000606481	2.58271	0.000771552	-0.25964	0.748369
201709	chr1	71955150	71956299	Stable	2.59955	0.000145249	3.52962	0.00041966	-0.639194	0.315342
201710	chr1	71956850	71957049	Stable	2.69548	8.78596e-05	2.20798	0.0031447	-0.147668	0.857127
201711	chr1	71957150	71957349	Stable	1.69445	0.00690084	2.74146	0.00705291	0.0367668	0.977531
201712	chr1	71958000	71958599	Stable	2.6477	0.00014486	2.68907	0.00106383	-0.257669	0.730113
201713	chr1	71958800	71959299	Stable	2.54334	0.000131883	2.58349	0.00150704	-0.171308	0.852511
201714	chr1	71961000	71961099	Stable	1.73859	0.00444586	2.18182	0.0106987	-0.102104	0.924885
201715	chr1	71961900	71962099	Stable	1.78438	0.00214184	2.54462	0.0048994	0.0455198	0.964056
201716	chr1	71963050	71963599	Stable	2.19158	0.000505123	2.33377	0.00126213	-0.205559	0.796148
201717	chr1	71964500	71964699	ctrlonly	0.64609	0.181541	2.66029	0.000683112	-1.55541	0.0300585
201718	chr1	71964850	71965099	Stable	2.01106	0.00149276	3.54272	0.00174079	-0.268792	0.764949
201719	chr1	71966150	71966249	Stable	2.417	0.000251023	3.22579	0.00172386	0.146961	0.872802
201720	chr1	71967300	71967449	Stable	3.14976	4.95645e-05	1.56015	0.0199829	0.439037	0.575686
201721	chr1	71967500	71968249	Stable	2.67815	0.000105563	2.99703	0.000505669	-0.245632	0.741598
201722	chr1	71968400	71968549	Stable	2.34193	0.00057931	2.42721	0.00683168	0.177681	0.852229
201723	chr1	71969300	71972649	Stable	3.6312	1.62994e-05	4.03847	0.00041966	-0.18136	0.820244
201724	chr1	71972850	71973799	Stable	2.98088	5.53348e-05	3.49802	0.000553979	0.26889	0.722782
201725	chr1	71973900	71974649	Stable	2.49675	0.000166853	2.98171	0.000548401	0.233324	0.754742
201726	chr1	71974700	71975099	Stable	2.64155	0.000498897	2.9868	0.00057327	0.070294	0.940303
201727	chr1	71975250	71975799	Stable	2.60885	0.000129192	3.20853	0.000898747	-0.419808	0.548981
201728	chr1	71975850	71977449	Stable	3.34738	2.29099e-05	3.21151	0.000487559	-0.112121	0.896265
201729	chr1	71977500	71982099	Stable	3.87363	1.55559e-05	3.69794	0.00041966	0.172915	0.831687
201730	chr1	71982200	71984149	Stable	2.95811	5.9623e-05	3.28403	0.000476207	0.211144	0.784486
201731	chr1	71984900	71985149	Stable	1.46711	0.0111486	2.91695	0.00137508	-0.265356	0.760704
201732	chr1	71985600	71985799	Stable	2.04428	0.000878733	2.75516	0.00250914	0.115541	0.917837
201733	chr1	71986000	71987049	Stable	2.45795	0.000182527	2.99719	0.000831194	-0.0484802	0.958612
201734	chr1	71990350	71990749	Stable	1.65873	0.00340712	2.96149	0.00103451	-0.530213	0.477533
201735	chr1	71990850	71991199	Stable	2.50426	0.000453101	2.79333	0.000795923	-0.202879	0.795804
201736	chr1	71991400	71991749	Stable	3.91042	1.55559e-05	2.95654	0.000919856	0.334845	0.661558
201737	chr1	71991950	71992049	Stable	2.19982	0.000798824	1.94214	0.0128313	0.359244	0.685223
201738	chr1	71995000	71995099	other	0.9266	0.0867014	2.58639	0.00081903	-0.546572	0.437541
201739	chr1	71997600	71997899	Stable	3.44784	2.00064e-05	1.57987	0.0060856	0.288497	0.692217
201740	chr1	71998000	71998149	Stable	1.76911	0.00251896	2.51048	0.000890153	-0.238865	0.757118
201741	chr1	71999600	72003949	Stable	3.96214	1.55559e-05	4.52129	0.00041966	-0.265719	0.726758
201742	chr1	72004800	72004899	Stable	1.58081	0.00487947	2.62375	0.00860902	-0.265388	0.716556
201743	chr1	72006450	72006849	Stable	2.3195	0.000293998	2.3278	0.00140959	-0.324344	0.659976
201744	chr1	72008700	72008799	Stable	3.02955	0.000175667	1.92025	0.00584723	0.102178	0.906243
201745	chr1	72008850	72009099	ctrlonly	0.367353	0.48384	3.7341	0.000484717	-2.01184	0.028914
201746	chr1	72009200	72009499	Stable	1.82934	0.00264796	2.34658	0.00171772	-0.539158	0.426582
201747	chr1	72009750	72010149	Stable	3.07034	3.71202e-05	1.73338	0.00672105	0.0867752	0.927474
201748	chr1	72013600	72013899	Stable	2.35799	0.00111406	2.66318	0.00116932	-0.361038	0.635515
201749	chr1	72014000	72014399	Stable	2.57633	0.000124271	2.37656	0.00193362	0.254762	0.750963
201750	chr1	72014500	72015099	Stable	2.80182	7.66466e-05	3.04471	0.00237094	0.0032722	0.997445
201751	chr1	72015250	72015799	Stable	2.83965	7.58396e-05	3.15381	0.000486975	0.11117	0.897952
201752	chr1	72017400	72017799	Stable	3.47527	2.13488e-05	1.73377	0.00539492	0.0791907	0.933087
201753	chr1	72018350	72018849	Stable	3.18142	3.09755e-05	2.58438	0.00105887	0.0030199	0.997834
201754	chr1	72019000	72019249	Stable	1.94832	0.00203798	2.5477	0.00536105	-0.235444	0.757609
201755	chr1	72019300	72019849	Stable	2.26885	0.000365962	2.49977	0.000973164	-0.130439	0.881
201756	chr1	72021450	72023649	Stable	2.68926	9.37519e-05	3.94417	0.00041966	-0.453515	0.500542
201757	chr1	72028800	72028949	other	2.33551	0.0009656	0.990691	0.0958428	0.670616	0.383355
201758	chr1	72029500	72029649	Stable	2.45501	0.000180447	1.76947	0.0050656	0.680555	0.284307
201759	chr1	72033150	72033749	Stable	3.55012	1.81515e-05	3.35503	0.000461812	0.653643	0.310701
201760	chr1	72033850	72033949	Stable	1.25891	0.0175917	1.73304	0.00869987	-0.0394175	0.969332
201761	chr1	72034150	72034799	Stable	2.70475	0.000242016	2.57737	0.000731393	0.450042	0.490247
201762	chr1	72051800	72052649	Stable	1.79896	0.00206147	3.24698	0.000457134	-0.924309	0.145707
201763	chr1	72052900	72053699	Stable	2.38141	0.000226333	3.2652	0.000455035	-0.487813	0.444023
201764	chr1	72059900	72060399	Stable	2.76508	7.51046e-05	1.80909	0.00613072	0.640618	0.306957
201765	chr1	72060650	72061599	Stable	3.25009	4.71969e-05	3.17277	0.00045762	0.17076	0.838424
201766	chr1	72061900	72061999	Stable	2.27287	0.00033782	3.21442	0.00117991	0.473057	0.542751
201767	chr1	72065750	72065899	other	2.35368	0.000291381	0.921471	0.105804	1.13934	0.0955434
201768	chr1	72068000	72068449	Stable	1.25067	0.0229364	3.34874	0.000423014	-0.826587	0.223376
201769	chr1	72068500	72071299	Stable	3.59371	1.72666e-05	3.48723	0.000422791	-0.0898505	0.920134
201770	chr1	72074450	72074649	Stable	2.32702	0.000318353	2.65863	0.0077832	-0.389694	0.571724
201771	chr1	72075000	72075149	Stable	1.8042	0.00607823	2.08978	0.00192848	-0.248181	0.756583
201772	chr1	72075900	72076249	Stable	2.60787	0.000205687	2.51365	0.00083961	-0.295431	0.695461
201773	chr1	72077000	72077449	Stable	2.79784	9.93941e-05	2.37052	0.00135153	-0.34413	0.654885
201774	chr1	72078550	72078749	Stable	3.06812	5.14588e-05	1.9849	0.00985994	0.184985	0.869061
201775	chr1	72079350	72079499	other	0.981045	0.0601418	2.43035	0.00103007	-0.53515	0.43304
201776	chr1	72084500	72084999	Stable	2.55083	0.000130165	2.90028	0.00075886	-0.0205709	0.984668
201777	chr1	72085500	72085699	Stable	2.83723	8.17837e-05	2.81115	0.000663085	0.244945	0.748719
201778	chr1	72103150	72103349	Stable	1.65428	0.0239012	3.37621	0.0045823	-0.920379	0.168384
201779	chr1	72103500	72103749	Stable	1.52381	0.0224432	2.87722	0.00056944	-1.03127	0.108907
201780	chr1	72104750	72105699	Stable	2.0245	0.00111843	3.27004	0.000430937	-1.20937	0.0695677
201781	chr1	72107600	72107849	Stable	1.98787	0.000918021	3.39847	0.000995325	-0.811108	0.202456
201782	chr1	72107950	72108899	Stable	3.38061	2.13088e-05	3.06521	0.000574327	0.123063	0.886434
201783	chr1	72108950	72109699	Stable	2.61608	0.000151511	3.62748	0.00041966	-0.535196	0.443068
201784	chr1	72110550	72110649	Stable	1.93098	0.00475411	2.72603	0.00859026	-0.680275	0.463139
201785	chr1	72113700	72114299	Stable	2.58684	0.000218448	2.97575	0.000635779	-0.843286	0.18894
201786	chr1	72114550	72114849	Stable	2.13833	0.000505485	2.63495	0.00145219	-0.700579	0.305406
201787	chr1	72115050	72115199	Stable	2.17895	0.00077279	2.44899	0.00879113	-1.49451	0.101142
201788	chr1	72119600	72119699	Stable	2.53077	0.00165034	2.42039	0.00269068	0.740527	0.252703
201789	chr1	72119900	72120899	Stable	2.30041	0.000521292	3.40646	0.000425374	-0.155633	0.859639
201790	chr1	72121350	72122399	Stable	2.79564	7.53986e-05	3.08085	0.000524088	0.0287027	0.977374
201791	chr1	72122650	72123799	Stable	3.54366	2.36926e-05	3.47646	0.00041966	0.14442	0.866742
201792	chr1	72124250	72124399	Stable	2.10643	0.000930219	3.14912	0.00478992	-0.0197626	0.987798
201793	chr1	72124550	72124649	other	0.418034	0.588666	1.08116	0.136269	-1.7737	0.163173
201794	chr1	72142150	72142449	Stable	2.74379	0.000389648	1.80489	0.00498073	0.433184	0.531618
201795	chr1	72144400	72144499	other	-0.216524	0.689777	2.50909	0.000893865	-1.66015	0.0505007
201796	chr1	72144700	72145249	Stable	2.45666	0.000168005	3.4038	0.000424971	-0.604687	0.330739
201797	chr1	72211850	72212299	Stable	3.51702	2.40195e-05	3.46874	0.00048741	0.3891	0.625184
201798	chr1	72225800	72226399	Stable	3.79332	1.72666e-05	3.57199	0.000789805	-0.19834	0.844831
201799	chr1	72233700	72233849	Stable	2.01913	0.00221619	1.17387	0.0250179	-0.0763883	0.934322
201800	chr1	72236500	72237099	Stable	4.13674	2.03921e-05	3.93479	0.00041966	-0.0327329	0.978139
201801	chr1	72243350	72244549	Stable	4.24713	1.55559e-05	4.57018	0.00041966	-0.0298343	0.978312
201802	chr1	72254600	72255999	Stable	3.42762	2.39187e-05	3.61773	0.000424971	0.021864	0.984661
201803	chr1	72283700	72284249	Stable	3.18019	3.24904e-05	3.36948	0.000447681	-0.142277	0.864989
201804	chr1	72284550	72284749	Stable	2.27835	0.000353966	3.17319	0.00245751	-0.345994	0.611141
201805	chr1	72306400	72308149	Stable	3.83653	1.56052e-05	4.18923	0.00041966	-0.268479	0.715771
201806	chr1	72309050	72309249	common_ctrlhigh	1.40187	0.0105636	2.91048	0.00163406	-1.8598	0.0176995
201807	chr1	72309450	72309849	ctrlonly	1.06471	0.0650346	2.84589	0.000639272	-2.1456	0.0156169
201808	chr1	72310050	72310449	ctrlonly	0.927857	0.0775305	3.44729	0.00124114	-1.47502	0.043702
201809	chr1	72428400	72429199	Stable	2.08286	0.000765431	3.71066	0.000430378	-1.409	0.0570291
201810	chr1	72429550	72429749	ctrlonly	0.401765	0.461247	2.73095	0.00129623	-1.86052	0.0206937
201811	chr1	72430050	72430149	ctrlonly	-0.561256	0.420575	2.7447	0.00994638	-2.50688	0.0491301
201812	chr1	72447700	72447849	ctrlonly	-0.248929	0.611034	2.84699	0.0041673	-2.1978	0.0107202
201813	chr1	72448400	72448549	ctrlonly	-0.801973	0.103406	3.05723	0.000661631	-2.19514	0.00953523
201814	chr1	72448900	72449099	other	0.110851	0.899077	2.34161	0.00101687	-2.94999	0.0539395
201815	chr1	72449500	72449699	other	-0.253855	0.676386	2.43404	0.00206684	-1.79495	0.0661563
201816	chr1	72449950	72451349	common_ctrlhigh	1.81104	0.00165612	3.96276	0.00041966	-1.74916	0.0202248
201817	chr1	72451500	72451699	ctrlonly	-0.0582284	0.903359	2.43363	0.00610718	-2.10233	0.0141965
201818	chr1	72465100	72465449	Stable	2.09175	0.00067463	3.3677	0.000568379	-0.498039	0.48965
201819	chr1	72502050	72502299	ctrlonly	-0.484754	0.458147	2.7386	0.00096257	-2.49771	0.0295601
201820	chr1	72538150	72538249	other	-0.00654659	0.993517	2.26539	0.0029267	-2.03357	0.138261
201821	chr1	72539050	72539299	ctrlonly	0.492887	0.322202	2.42187	0.00909202	-2.04095	0.0249522
201822	chr1	72550700	72551149	Stable	2.51747	0.000224098	3.02907	0.000609638	-0.922103	0.17285
201823	chr1	72564200	72564349	other	-0.584622	0.431812	2.76741	0.000719698	-2.55416	0.0525674
201824	chr1	72582200	72584199	Stable	3.11741	5.28034e-05	3.76337	0.00041966	-0.0832513	0.931565
201825	chr1	72608600	72609249	Stable	1.42053	0.012231	2.91931	0.000544121	-1.11558	0.0885852
201826	chr1	72609650	72609749	ctrlonly	0.324818	0.556312	2.41863	0.00776534	-2.09618	0.0255071
201827	chr1	72710550	72712399	Stable	4.08619	1.58593e-05	4.187	0.00041966	-0.361398	0.65139
201828	chr1	72712500	72713049	Stable	1.78871	0.002429	3.47682	0.0013549	-0.911212	0.205532
201829	chr1	72720100	72720449	Stable	3.05627	6.03519e-05	2.37863	0.00209298	0.0176632	0.98752
201830	chr1	72720800	72721549	Stable	2.86345	0.000475397	2.73058	0.00134855	-0.329089	0.665513
201831	chr1	72729650	72729949	common_ctrlhigh	1.27682	0.016038	3.65584	0.00041966	-1.58967	0.0309893
201832	chr1	73845850	73845999	ctrlonly	-0.210519	0.693032	2.77913	0.000639699	-1.8638	0.0346491
201833	chr1	73902600	73902949	Stable	3.04773	5.6798e-05	3.03933	0.000547414	-0.665563	0.335483
201834	chr1	73951400	73951749	Stable	2.30746	0.000343761	2.03357	0.00522927	0.194105	0.828699
201835	chr1	73951950	73952099	Stable	1.83201	0.00407506	2.55476	0.00192848	-0.32938	0.673402
201836	chr1	73954950	73955299	Stable	3.18916	2.8899e-05	2.40846	0.00118871	0.185983	0.814393
201837	chr1	73955750	73956049	Stable	3.19448	5.3852e-05	3.0482	0.00136309	-0.0453427	0.964849
201838	chr1	73956100	73956249	Stable	2.07049	0.00322499	2.44584	0.00291407	0.00811947	0.994007
201839	chr1	73956850	73956999	other	2.15863	0.00055226	0.748574	0.313225	0.721756	0.465989
201840	chr1	73957700	73958399	Stable	2.44129	0.000293937	2.88129	0.000536791	-0.553713	0.379561
201841	chr1	73958700	73958949	Stable	2.14658	0.000483455	2.44696	0.00121444	-0.169467	0.84152
201842	chr1	73959150	73959299	Stable	3.27104	0.00011155	2.94091	0.00228133	-0.409394	0.560594
201843	chr1	73959400	73959499	Stable	1.4741	0.0111015	2.38514	0.00192657	-0.17734	0.841998
201844	chr1	73962350	73963099	Stable	3.35019	2.71743e-05	3.13828	0.00138684	0.207161	0.832526
201845	chr1	73963250	73964499	Stable	3.24521	3.13326e-05	3.43938	0.000460524	-0.0745771	0.93878
201846	chr1	73968300	73968399	other	0.206362	0.667703	1.6192	0.00653329	-0.823462	0.1983
201847	chr1	73969050	73969199	common_ctrlhigh	1.10389	0.0367679	2.88607	0.00295379	-1.42582	0.0482003
201848	chr1	73994400	73994999	Stable	2.74456	9.74555e-05	3.10967	0.000772199	0.507249	0.507326
201849	chr1	73995150	73995349	Stable	2.6187	0.000170648	2.06954	0.00608326	0.482915	0.533444
201850	chr1	73995400	73996149	Stable	2.93837	7.47731e-05	2.63854	0.000727365	0.116458	0.895387
201851	chr1	73996750	73996949	Stable	1.70273	0.00268103	3.78774	0.000726185	0.340695	0.624136
201852	chr1	73997400	73997699	Stable	2.57451	0.000267395	1.67636	0.0142092	0.0994789	0.923275
201853	chr1	73997750	74000349	Stable	3.7199	1.72145e-05	3.51945	0.00043096	0.216767	0.798862
201854	chr1	74000450	74001099	Stable	3.78583	1.83536e-05	1.97116	0.0143565	1.167	0.161486
201855	chr1	74001550	74001799	Stable	1.93609	0.00107141	3.13792	0.00323213	-0.183333	0.816533
201856	chr1	74002000	74002149	other	2.21967	0.000391316	1.2632	0.0717781	0.817355	0.238671
201857	chr1	74005000	74005099	Stable	1.7476	0.00956793	2.91944	0.00347526	-0.288125	0.814486
201858	chr1	74007400	74007599	Stable	1.57497	0.00446341	3.14908	0.00107735	-0.201116	0.798943
201859	chr1	74007850	74009449	Stable	2.67261	0.000128582	3.46774	0.000436338	-0.362853	0.626377
201860	chr1	74015200	74016849	Stable	2.87518	8.8826e-05	2.98607	0.00117991	-0.178601	0.860482
201861	chr1	74017050	74017749	Stable	2.6263	0.000150796	3.21234	0.000611272	-0.291393	0.715806
201862	chr1	74024600	74024699	other	1.90691	0.00119801	-0.211291	0.830748	2.06122	0.107079
201863	chr1	74025050	74025349	Stable	1.95652	0.00133494	3.15053	0.000606955	-0.0860087	0.93484
201864	chr1	74025800	74026349	Stable	2.78672	0.000318007	2.59588	0.000733402	0.131337	0.877122
201865	chr1	74026400	74028799	Stable	3.59475	2.5801e-05	3.61889	0.000481384	0.119691	0.90924
201866	chr1	74028900	74030299	Stable	2.67906	0.000178303	3.70817	0.000448597	-0.463459	0.558088
201867	chr1	74030400	74032199	Stable	2.83476	7.06541e-05	2.9956	0.000880774	-0.0935765	0.924371
201868	chr1	74033400	74033549	other	2.51539	0.000170974	1.12765	0.132605	1.41603	0.115159
201869	chr1	74035100	74035199	Stable	2.18444	0.000607275	2.04067	0.00480663	0.0864948	0.932244
201870	chr1	74035450	74035549	other	2.38013	0.000469849	1.65496	0.118054	0.69905	0.295455
201871	chr1	74036050	74037449	Stable	3.2903	2.72452e-05	3.29144	0.000452917	0.250299	0.744334
201872	chr1	74040800	74042999	Stable	3.34951	2.54467e-05	3.50441	0.000422747	0.00119787	0.999096
201873	chr1	74043100	74043599	Stable	2.55145	0.000151646	2.67754	0.000655577	0.078319	0.933556
201874	chr1	74047200	74047299	other	1.63454	0.0241411	0.638765	0.461055	1.46636	0.197904
201875	chr1	74048050	74048249	Stable	2.84656	6.72732e-05	2.0419	0.0129816	0.807153	0.204349
201876	chr1	74053500	74054049	Stable	2.61198	0.000124287	2.76577	0.000703761	-0.139408	0.872465
201877	chr1	74054150	74054949	Stable	2.67669	9.62971e-05	3.28359	0.000458009	-0.134106	0.879487
201878	chr1	74065650	74066099	Stable	2.65377	0.000103182	2.71705	0.00076657	0.329062	0.636265
201879	chr1	74066300	74067099	Stable	3.2099	3.82455e-05	3.2908	0.000553992	0.678529	0.300655
201880	chr1	74068900	74068999	Stable	2.3423	0.000351288	2.22521	0.00230559	0.234602	0.754761
201881	chr1	74069150	74069349	Stable	2.38846	0.000725145	2.26657	0.00332191	0.0811822	0.928711
201882	chr1	74081650	74081749	other	2.27651	0.000532032	0.41378	0.556965	1.61709	0.0942161
201883	chr1	74083000	74086199	Stable	4.1777	1.55559e-05	3.56321	0.000424971	0.502571	0.464531
201884	chr1	74089050	74089249	other	2.72459	7.98886e-05	1.42062	0.0671454	0.119931	0.920538
201885	chr1	74089850	74093549	Stable	4.50295	1.55559e-05	4.47729	0.00041966	-0.000581348	0.999539
201886	chr1	74093800	74094199	Stable	3.021	4.306e-05	3.19188	0.00363311	0.260604	0.738186
201887	chr1	74094300	74094649	Stable	2.85675	8.04854e-05	3.07905	0.00151387	0.434782	0.562399
201888	chr1	74095450	74095549	Stable	2.39226	0.000419558	2.34417	0.00154595	0.344404	0.633208
201889	chr1	74098200	74099199	Stable	3.11216	3.45281e-05	3.11832	0.000576456	0.210664	0.800345
201890	chr1	74107000	74107149	HH_dependent	2.9023	0.000112907	-1.27741	0.0681923	2.60731	0.0170848
201891	chr1	74110450	74111549	Stable	3.39496	2.24769e-05	2.70279	0.00122118	0.639334	0.350128
201892	chr1	74111750	74111849	Stable	2.13386	0.000546551	1.99326	0.0294974	0.545947	0.603557
201893	chr1	74111950	74112749	Stable	3.17321	5.00007e-05	2.40832	0.00291026	0.702984	0.346264
201894	chr1	74112850	74113749	Stable	2.94187	9.87642e-05	2.64273	0.000873692	0.107737	0.917507
201895	chr1	74113800	74114299	Stable	2.75645	7.6369e-05	2.82353	0.000599928	0.418785	0.526912
201896	chr1	74115550	74115649	Stable	2.17965	0.00235063	1.8132	0.0237429	0.610508	0.538745
201897	chr1	74118250	74118399	Stable	2.43108	0.000232041	2.30651	0.00531503	0.223677	0.796893
201898	chr1	74119100	74119199	other	1.39129	0.0144905	0.470922	0.71535	1.09721	0.436336
201899	chr1	74122200	74122549	Stable	4.3813	2.34992e-05	1.51889	0.011436	0.863199	0.197093
201900	chr1	74124550	74125049	Stable	3.14554	5.88859e-05	2.4406	0.00226179	0.381818	0.646489
201901	chr1	74149650	74149799	Stable	1.45879	0.0225985	2.9966	0.00111936	-1.1025	0.108011
201902	chr1	74177000	74177149	other	0.783735	0.114874	2.09001	0.00452225	-1.33411	0.0571599
201903	chr1	74177700	74178449	Stable	1.99994	0.000960255	3.30412	0.000488182	-0.935914	0.136889
201904	chr1	74200950	74201049	Stable	1.56646	0.00520768	1.09943	0.0355358	0.0098238	0.99296
201905	chr1	74205750	74205899	Stable	2.4217	0.000293191	1.66679	0.00580084	0.256885	0.733324
201906	chr1	74236000	74236299	Stable	3.11188	3.69489e-05	1.68906	0.0138286	0.959391	0.204219
201907	chr1	74236550	74237749	Stable	4.0662	1.56394e-05	3.99308	0.00041966	0.297752	0.734995
201908	chr1	74238600	74238749	Stable	2.26987	0.00293144	2.67625	0.000762011	-0.633506	0.38252
201909	chr1	74239900	74240149	Stable	1.38305	0.0221375	2.37172	0.00116265	-0.308463	0.750006
201910	chr1	74240300	74240999	Stable	2.88811	5.40545e-05	2.91257	0.00135812	-0.195114	0.822457
201911	chr1	74241050	74241149	Stable	2.4145	0.00141838	1.54243	0.00716779	-0.259307	0.787695
201912	chr1	74248100	74248249	other	1.91579	0.0030467	1.75113	0.0547459	-0.462995	0.682069
201913	chr1	74248300	74249949	Stable	3.24424	4.70569e-05	3.51201	0.00041966	-0.135805	0.893788
201914	chr1	74250250	74250349	HH_dependent	2.32429	0.000263364	0.699139	0.165903	1.867	0.0223246
201915	chr1	74283950	74284649	Stable	2.86374	0.000129369	3.29633	0.000472917	-0.0429494	0.971851
201916	chr1	74285100	74285599	Stable	3.53396	2.2509e-05	2.99168	0.000583842	-0.0410797	0.966967
201917	chr1	74294800	74298999	Stable	3.93207	1.56904e-05	4.2521	0.00041966	-0.0322739	0.976531
201918	chr1	74299100	74299899	Stable	3.1088	3.33228e-05	2.39711	0.00100542	0.480476	0.457092
201919	chr1	74302800	74304899	Stable	4.19249	1.55559e-05	4.37119	0.00041966	0.173111	0.838872
201920	chr1	74309550	74309699	Stable	2.45937	0.00123938	1.64227	0.0354788	-0.0281987	0.985067
201921	chr1	74313850	74313999	Stable	2.56989	0.00018294	2.28454	0.0239644	0.750033	0.272055
201922	chr1	74332900	74333249	Stable	2.53802	0.000259379	2.39111	0.000947073	0.323728	0.650141
201923	chr1	74362150	74362999	Stable	3.22314	9.01766e-05	3.8609	0.000422747	-0.401837	0.608731
201924	chr1	74386250	74388149	Stable	4.0029	1.58386e-05	3.92155	0.00041966	0.0906499	0.927241
201925	chr1	74390400	74391649	Stable	3.39902	2.23548e-05	2.81846	0.00108558	0.499032	0.465989
201926	chr1	74391750	74393499	Stable	4.48542	1.55559e-05	4.71752	0.00041966	0.0638664	0.952522
201927	chr1	74396450	74397349	Stable	3.7671	1.70438e-05	3.93334	0.000423014	0.269163	0.745751
201928	chr1	74397550	74398299	Stable	4.14616	1.55559e-05	3.21821	0.000533093	0.478443	0.5231
201929	chr1	74505200	74505749	Stable	2.98104	5.53037e-05	3.35756	0.000607742	0.5997	0.414706
201930	chr1	74506050	74507599	Stable	3.90231	1.56929e-05	3.57937	0.000421443	0.0205631	0.985342
201931	chr1	74586800	74588149	Stable	3.64254	1.77107e-05	3.75736	0.00041966	-0.0625516	0.95102
201932	chr1	74588400	74588799	Stable	4.03049	2.5619e-05	2.73386	0.000773837	-0.0506271	0.959116
201933	chr1	74600700	74601849	Stable	3.79754	1.70954e-05	3.21072	0.00107417	0.407534	0.616289
201934	chr1	74609750	74611649	Stable	2.92746	5.31418e-05	3.57299	0.00043868	-0.112999	0.901118
201935	chr1	74661700	74662649	Stable	3.88113	2.13802e-05	3.65982	0.00041966	0.0655094	0.948578
201936	chr1	74748900	74749499	Stable	2.88303	0.000117469	2.63502	0.00105521	0.237994	0.767862
201937	chr1	74769850	74769999	Stable	2.67038	0.00045746	1.85074	0.0234168	1.68507	0.0716541
201938	chr1	74772750	74773099	other	2.85208	6.10371e-05	0.821485	0.12871	1.33995	0.0785848
201939	chr1	74775000	74775149	Stable	2.86316	0.00127765	2.13215	0.0137341	1.37364	0.0811246
201940	chr1	74793350	74793499	HH_dependent	2.88306	6.73222e-05	-0.316076	0.551971	1.74595	0.0398104
201941	chr1	74794700	74794849	Stable	2.27066	0.00065764	3.04211	0.00171415	0.0335692	0.972872
201942	chr1	74807300	74807999	Stable	3.24576	2.84561e-05	2.22496	0.00136062	0.538393	0.408236
201943	chr1	74816600	74817499	Stable	3.23076	3.46525e-05	3.03709	0.000482996	0.52249	0.442657
201944	chr1	75123950	75125899	Stable	4.18263	1.55559e-05	4.19181	0.00041966	0.0486585	0.960183
201945	chr1	75127750	75127899	Stable	1.65533	0.00668668	2.46607	0.00324311	-0.751148	0.268694
201946	chr1	75128100	75129799	Stable	2.8237	6.94553e-05	3.36423	0.000440771	-0.712054	0.253301
201947	chr1	75140550	75140849	Stable	1.72485	0.00754796	2.99658	0.000720274	-1.15614	0.0808923
201948	chr1	75141050	75143699	Stable	4.3522	1.55559e-05	4.39629	0.00041966	-0.0305199	0.977507
201949	chr1	75168000	75169499	Stable	3.68488	1.75815e-05	3.34086	0.000436891	0.254435	0.755607
201950	chr1	75179750	75180299	Stable	2.62714	0.000233881	2.39206	0.00105451	0.136716	0.878504
201951	chr1	75191100	75191999	Stable	3.24982	3.43349e-05	4.0185	0.00041966	-0.321185	0.673503
201952	chr1	75192050	75193349	Stable	3.69017	1.73968e-05	3.70596	0.000531716	-0.0546938	0.957046
201953	chr1	75208650	75210099	Stable	3.48355	2.44365e-05	3.92989	0.00041966	-0.294959	0.706335
201954	chr1	75210300	75211549	Stable	3.45842	2.73125e-05	3.70366	0.00041966	0.0371239	0.973489
201955	chr1	75218300	75218649	Stable	2.87949	5.99069e-05	2.32568	0.00432332	0.386984	0.590971
201956	chr1	75218700	75219249	Stable	2.6875	0.000112143	2.97271	0.00053401	0.104599	0.905807
201957	chr1	75221750	75221949	Stable	2.04693	0.00144107	2.36152	0.0015202	-0.797709	0.301515
201958	chr1	75222100	75222199	Stable	2.47506	0.000932733	2.39168	0.00141957	-0.853243	0.228357
201959	chr1	75229100	75229199	ctrlonly	0.88528	0.123352	2.3168	0.00384367	-1.59345	0.0486449
201960	chr1	75229450	75229949	Stable	2.56049	0.000203093	3.27042	0.00152642	-0.360875	0.628114
201961	chr1	75230150	75230399	Stable	2.04854	0.00274836	2.64203	0.0019971	-1.17057	0.0942865
201962	chr1	75230550	75230649	other	2.77851	0.0004873	1.0282	0.18613	0.99255	0.173759
201963	chr1	75231600	75231699	Stable	2.02199	0.00102763	1.96215	0.00660626	-0.595122	0.38222
201964	chr1	75235400	75235649	Stable	2.55191	0.000260574	2.23411	0.0014329	0.98914	0.120327
201965	chr1	75235700	75236349	Stable	3.72878	1.70002e-05	3.63244	0.00041966	0.0838136	0.925414
201966	chr1	75236400	75237499	Stable	4.28274	1.55559e-05	3.58819	0.000422747	0.164397	0.870555
201967	chr1	75247850	75248999	Stable	3.32017	3.57342e-05	2.92024	0.000613654	-0.181985	0.846955
201968	chr1	75249150	75249399	Stable	3.57834	0.000100921	2.48481	0.00227701	-0.358645	0.657181
201969	chr1	75249500	75249599	Stable	2.21096	0.000424557	2.511	0.000972522	-0.64139	0.315949
201970	chr1	75249800	75249949	Stable	2.45604	0.00125079	3.05482	0.00127108	-0.825908	0.276792
201971	chr1	75263400	75264499	Stable	3.48038	3.00956e-05	3.72945	0.000470114	0.062954	0.957019
201972	chr1	75291750	75294499	Stable	3.37239	3.55705e-05	3.75855	0.00041966	-0.36827	0.654704
201973	chr1	75296100	75296399	Stable	2.19342	0.000463717	2.03211	0.0055084	-0.134065	0.895503
201974	chr1	75316300	75317499	Stable	3.58687	2.098e-05	3.6941	0.000421013	0.146819	0.878782
201975	chr1	75318150	75318799	Stable	3.58773	2.79674e-05	2.99308	0.000659579	0.353347	0.62667
201976	chr1	75359050	75359299	Stable	2.48184	0.00020778	1.73958	0.00495739	0.0840142	0.92597
201977	chr1	75359350	75359449	Stable	1.82115	0.0060372	2.90367	0.00052576	-0.0170629	0.989976
201978	chr1	75381300	75382099	Stable	3.96054	1.56052e-05	3.11716	0.000753356	0.522425	0.498439
201979	chr1	75382200	75383149	Stable	3.78032	1.58593e-05	3.44813	0.000455957	0.200264	0.807079
201980	chr1	75391950	75394349	Stable	4.04468	1.55559e-05	3.6305	0.000424869	0.223256	0.794416
201981	chr1	75398350	75398449	Stable	1.5526	0.01448	2.48151	0.00150704	-0.180121	0.822825
201982	chr1	75398650	75401199	Stable	3.68527	1.71312e-05	3.95987	0.00041966	-0.109394	0.906398
201983	chr1	75435200	75435299	Stable	2.7841	0.000188513	1.88262	0.00257858	-0.120871	0.886403
201984	chr1	75435350	75436999	Stable	3.33067	3.17052e-05	3.88507	0.00041966	0.0288489	0.979442
201985	chr1	75458200	75459149	Stable	3.11852	6.85006e-05	3.6365	0.000701874	-0.137476	0.884798
201986	chr1	75467500	75467649	Stable	2.29506	0.000374351	2.7312	0.00185603	-0.0887075	0.923663
201987	chr1	75474650	75474849	Stable	3.69583	2.01159e-05	1.35119	0.0259366	0.631508	0.33237
201988	chr1	75478350	75479449	Stable	3.89591	1.63164e-05	3.91613	0.00041966	0.024704	0.982604
201989	chr1	75504550	75507399	Stable	4.63089	1.55559e-05	4.61071	0.00041966	0.249954	0.776027
201990	chr1	75511400	75511549	HH_dependent	2.05632	0.00094293	-0.165139	0.867604	2.58249	0.0478691
201991	chr1	75512850	75512949	HH_dependent	2.22297	0.000928221	0.0281855	0.957625	1.67392	0.0458161
201992	chr1	75518050	75519049	Stable	3.40137	2.65741e-05	2.44401	0.00118128	0.848615	0.189239
201993	chr1	75519250	75522399	Stable	4.35589	1.55559e-05	3.74444	0.00041966	0.359829	0.608409
201994	chr1	75523700	75523849	Stable	2.00539	0.000800852	1.9563	0.00287076	-0.149642	0.86086
201995	chr1	75524100	75524249	Stable	2.43431	0.000221682	2.80032	0.000579191	-0.420389	0.522606
201996	chr1	75524700	75524799	other	1.91677	0.00157172	0.775182	0.172664	1.08721	0.163285
201997	chr1	75545550	75546999	Stable	3.96886	1.55559e-05	4.17378	0.00041966	0.296387	0.724544
201998	chr1	75547050	75547349	Stable	2.91958	5.16421e-05	1.98909	0.00451843	1.02714	0.144242
201999	chr1	75558900	75559499	Stable	2.92064	5.89525e-05	2.926	0.000716369	0.294173	0.694195
[truncated: 108,246 more rows]

## Sheet: Stable
Peak ID	Chromosome	Start	End	Type	pminput_FC	pminput_adjPval	ctrlinput_FC	ctrlinput_adjPval	pmctrl_FC	pmctrl_adjPval
200001	chr1	4784850	4786499	Stable	3.28637	3.28812e-05	3.81707	0.00041966	-0.25369	0.745129
200002	chr1	4807150	4808449	Stable	3.50031	1.93598e-05	3.9483	0.00041966	0.0686742	0.943125
200003	chr1	4856350	4859149	Stable	3.79771	1.73259e-05	4.06668	0.00041966	-0.196104	0.826777
200004	chr1	4859450	4859649	Stable	2.94512	0.000118108	2.39609	0.0118086	0.176582	0.862212
200006	chr1	5015950	5016099	Stable	1.19393	0.0374863	2.91962	0.00553152	-0.493328	0.487087
200007	chr1	5018350	5020099	Stable	3.59687	1.99428e-05	3.39181	0.000424782	-0.229605	0.784077
200008	chr1	5023250	5023649	Stable	2.86963	0.000106947	1.5361	0.0110241	0.551223	0.457998
200009	chr1	5070500	5070699	Stable	2.02579	0.000913839	1.73518	0.0144529	1.11846	0.0858734
200010	chr1	5082600	5083899	Stable	3.49073	2.02062e-05	3.91638	0.00041966	-0.161323	0.849875
200011	chr1	6213550	6215799	Stable	4.3415	1.55559e-05	4.35941	0.00041966	0.0800437	0.936245
200014	chr1	6278150	6281699	Stable	3.7491	1.58593e-05	3.42932	0.000427118	0.424907	0.531611
200015	chr1	6281850	6282049	Stable	2.17747	0.00051998	1.654	0.0271989	0.90568	0.241198
200016	chr1	6282150	6282699	Stable	2.99232	4.36525e-05	1.90199	0.00528972	1.36846	0.0508095
200017	chr1	6283450	6283649	Stable	2.78029	0.000218239	2.38589	0.00209298	1.21434	0.0771724
200019	chr1	6285500	6286299	Stable	3.12748	4.48895e-05	1.78489	0.00380073	1.068	0.116441
200020	chr1	6286750	6287099	Stable	2.7916	7.00604e-05	1.99324	0.00257245	1.13604	0.079927
200021	chr1	6287150	6287899	Stable	3.70333	7.53249e-05	2.70729	0.000626592	0.547584	0.402132
200022	chr1	6288100	6289649	Stable	3.47988	2.03292e-05	3.24812	0.000484184	0.159416	0.851412
200023	chr1	6289750	6289999	Stable	2.85035	0.00010722	1.66123	0.0133205	0.870063	0.219984
200024	chr1	6290100	6290999	Stable	2.59908	0.000144474	3.21708	0.000512597	-0.150341	0.86679
200025	chr1	6304700	6305549	Stable	3.03385	5.57714e-05	2.36881	0.00140702	0.690928	0.316199
200026	chr1	6305800	6306799	Stable	3.25272	2.99348e-05	2.52677	0.000886496	0.500998	0.45847
200035	chr1	6406700	6406949	Stable	2.58517	0.000160283	2.19748	0.00184098	0.31846	0.669384
200037	chr1	7087850	7088849	Stable	4.09825	1.56394e-05	4.27031	0.00041966	-0.00125618	0.999096
200038	chr1	7088950	7090899	Stable	3.84353	1.56394e-05	4.06241	0.00041966	-0.123995	0.887233
200039	chr1	7104300	7105199	Stable	3.27221	3.81594e-05	3.74446	0.00041966	-0.375282	0.612026
200040	chr1	7105300	7105949	Stable	2.76895	0.000160247	2.87555	0.000740113	0.159071	0.86921
200041	chr1	7206150	7206449	Stable	3.06985	6.77654e-05	1.83581	0.0042458	0.891275	0.206525
200042	chr1	7206550	7206649	Stable	1.96217	0.00134579	2.08313	0.00365725	0.577353	0.423805
200043	chr1	7206800	7207099	Stable	2.73773	0.00017924	2.23537	0.00967328	0.562875	0.558836
200044	chr1	7397100	7397949	Stable	2.99912	4.52777e-05	2.38815	0.00241203	0.578871	0.435113
200045	chr1	7398150	7398799	Stable	3.45596	8.03118e-05	3.84442	0.00041966	0.12213	0.918084
200046	chr1	9545500	9546949	Stable	2.86114	6.92368e-05	3.31661	0.000472678	-0.027104	0.97972
200048	chr1	9565000	9565149	Stable	2.29902	0.000290182	2.14644	0.0118131	0.392349	0.597708
200050	chr1	9577700	9577949	Stable	1.29547	0.0187129	2.96534	0.000780314	-1.25936	0.0827083
200051	chr1	9578400	9579449	Stable	2.26244	0.000431045	3.09573	0.000578086	-0.293964	0.698788
200052	chr1	9627200	9627399	Stable	2.18372	0.00131344	1.45632	0.0222805	0.244173	0.798355
200053	chr1	9629450	9631799	Stable	3.14552	4.52534e-05	4.00937	0.00041966	-0.496259	0.500845
200054	chr1	9700550	9701349	Stable	3.43744	2.51574e-05	3.81435	0.00041966	-0.0223714	0.984625
200055	chr1	9747050	9747199	Stable	1.50871	0.00739372	2.9848	0.000785667	-0.551782	0.404297
200056	chr1	9747250	9748399	Stable	3.74795	1.78109e-05	3.24837	0.000641896	0.29543	0.724401
200057	chr1	9748700	9749099	Stable	3.17436	5.73714e-05	3.61037	0.000431908	0.343899	0.622049
200058	chr1	9942750	9944949	Stable	3.93154	1.56388e-05	4.33752	0.00041966	-0.190007	0.825927
200059	chr1	9945000	9945099	Stable	1.60706	0.00384378	2.86339	0.00136121	-0.316771	0.662321
200060	chr1	9982550	9983399	Stable	2.39419	0.000244768	2.8576	0.000639272	-0.801588	0.224578
200061	chr1	9984050	9984349	Stable	2.45994	0.000363172	2.90802	0.00160706	-1.03543	0.132904
200062	chr1	10036950	10039649	Stable	4.25221	1.55559e-05	4.78599	0.00041966	-0.18386	0.833036
200063	chr1	10039750	10040399	Stable	3.58751	1.93181e-05	3.4198	0.00054112	0.370213	0.651205
200064	chr1	10231800	10233899	Stable	4.23706	1.55559e-05	4.30025	0.00041966	0.40395	0.602412
200065	chr1	10592000	10592799	Stable	2.15011	0.000725839	3.38504	0.000549726	-0.971362	0.16035
200066	chr1	10592850	10593449	Stable	1.86801	0.00195666	3.3409	0.000488111	-1.1269	0.093129
200068	chr1	10699550	10699849	Stable	2.20949	0.000680764	2.58955	0.00149629	-0.676221	0.342692
200071	chr1	10709600	10710299	Stable	2.93309	5.2668e-05	3.18913	0.000443908	-1.04674	0.0998965
200073	chr1	10718550	10720549	Stable	3.08874	3.88846e-05	3.81967	0.00041966	-0.635934	0.322435
200074	chr1	10720750	10720949	Stable	1.41467	0.0126638	2.74683	0.000966328	-0.835888	0.217102
200076	chr1	10871800	10872299	Stable	2.59831	0.000113684	3.24669	0.00047953	-0.182317	0.819628
200077	chr1	10872450	10873249	Stable	3.04245	4.25902e-05	3.16407	0.000525044	-0.150209	0.85431
200078	chr1	10873300	10873499	Stable	1.92613	0.00257088	2.67382	0.000963438	-1.20498	0.0848437
200079	chr1	10877600	10878599	Stable	2.32636	0.00025597	3.09958	0.000460911	-0.151281	0.853347
200080	chr1	10878650	10878949	Stable	1.75839	0.00490958	3.45912	0.000434226	-0.835934	0.275611
200081	chr1	10879900	10880499	Stable	2.67787	0.000140858	3.39757	0.000530114	-0.143046	0.878185
200083	chr1	10955650	10955899	Stable	2.48302	0.000237959	2.71771	0.000647584	-0.0830119	0.929632
200084	chr1	10955950	10956149	Stable	1.30445	0.0218359	3.24551	0.000456777	-1.01261	0.138048
200085	chr1	10993550	10993749	Stable	2.71166	9.21825e-05	2.02917	0.00209238	0.389202	0.576891
200086	chr1	10993800	10993899	Stable	2.05762	0.00180051	1.78201	0.0384866	0.785089	0.347257
200089	chr1	12718400	12718599	Stable	1.73228	0.00305444	3.12015	0.000482409	-0.314149	0.683121
200090	chr1	12718850	12718949	Stable	1.72383	0.00246132	1.43557	0.0476036	0.502351	0.560152
200091	chr1	13371950	13374699	Stable	4.11477	1.55559e-05	4.33111	0.00041966	0.204868	0.828647
200092	chr1	13426700	13426949	Stable	1.81852	0.00196746	2.31631	0.00848977	0.553194	0.547764
200094	chr1	13588600	13589949	Stable	4.37914	1.55559e-05	4.02322	0.00041966	0.0276509	0.980846
200095	chr1	13639150	13639349	Stable	1.20938	0.0364452	3.00551	0.000520285	-0.818704	0.288146
200096	chr1	13659300	13661049	Stable	3.83619	1.56566e-05	4.18011	0.00041966	0.0523049	0.958984
200098	chr1	14162300	14162799	Stable	2.9473	6.76924e-05	2.5134	0.00203434	0.402084	0.587644
200100	chr1	14184300	14184599	Stable	2.3804	0.00021396	2.40477	0.000990588	0.493375	0.439242
200101	chr1	14184650	14184799	Stable	2.15754	0.000614109	2.32832	0.00315603	0.279153	0.708959
200102	chr1	14185350	14186249	Stable	3.44013	2.52159e-05	2.38556	0.00114146	0.477329	0.478384
200104	chr1	14273300	14275099	Stable	2.61576	0.000107785	3.04308	0.000477116	-0.249095	0.735552
200105	chr1	14304300	14304449	Stable	2.21237	0.000601838	1.63535	0.0307276	0.628445	0.43458
200106	chr1	14304550	14311049	Stable	4.32236	1.55559e-05	4.63364	0.00041966	-0.363047	0.598515
200107	chr1	14311100	14311249	Stable	2.85146	6.06475e-05	2.04555	0.00564962	0.195519	0.839882
200108	chr1	14312550	14312749	Stable	2.96695	4.74034e-05	2.37617	0.00689946	0.625352	0.351771
200109	chr1	14359500	14359999	Stable	2.76313	0.000190976	3.71853	0.000433757	-0.90042	0.234327
200110	chr1	14360350	14360699	Stable	2.65807	0.000107042	2.40954	0.0010249	-0.244916	0.744525
200119	chr1	14465250	14465499	Stable	2.63963	0.000160139	2.58587	0.00154954	0.102938	0.914531
200121	chr1	14484150	14484549	Stable	2.00949	0.000774407	2.56076	0.000759133	-0.691621	0.259807
200122	chr1	15805000	15805449	Stable	2.84355	0.000104173	3.30266	0.000504898	-0.172112	0.837252
200123	chr1	15805550	15806599	Stable	4.18755	1.55559e-05	4.31705	0.00041966	0.00168291	0.9988
200124	chr1	16103200	16107099	Stable	4.08703	1.55559e-05	4.1775	0.00041966	0.0335628	0.975466
200125	chr1	16108550	16108949	Stable	1.89174	0.00150215	3.01145	0.000550226	-0.673227	0.301281
200126	chr1	16113250	16113349	Stable	2.48239	0.000237959	1.31322	0.0184494	0.645671	0.30811
200127	chr1	16213050	16213649	Stable	2.66805	9.24389e-05	2.55008	0.000979865	-0.0181827	0.985612
200129	chr1	16225800	16225949	Stable	2.21585	0.00103157	2.86885	0.00350065	0.276842	0.747699
200130	chr1	16226550	16230149	Stable	3.36753	2.24855e-05	3.75707	0.00041966	-0.132073	0.877874
200131	chr1	16231500	16231599	Stable	2.34491	0.000301298	2.22342	0.00558822	-0.161216	0.857451
200132	chr1	16241500	16241849	Stable	1.69726	0.00325892	3.69378	0.00041966	-1.08981	0.104657
200133	chr1	16248250	16249149	Stable	3.21867	2.75563e-05	2.8743	0.00110756	0.11775	0.890153
200134	chr1	16249300	16250199	Stable	2.83748	7.03658e-05	2.53872	0.000857052	0.426891	0.537763
200135	chr1	16311850	16312449	Stable	2.25866	0.00046734	2.89147	0.00085407	-0.0760257	0.937062
200136	chr1	16312800	16313099	Stable	2.49476	0.000202734	2.30101	0.00132529	0.0901828	0.92084
200137	chr1	16313200	16313299	Stable	2.54445	0.000574459	2.14685	0.00405369	-1.18088	0.110779
200138	chr1	16519000	16520249	Stable	3.92703	1.67941e-05	3.33762	0.000770549	0.491705	0.574551
200139	chr1	16606650	16606849	Stable	1.91406	0.00382057	2.8285	0.00991164	-0.890803	0.176824
200140	chr1	16607050	16607499	Stable	1.40201	0.0123582	2.96122	0.00052996	-0.720035	0.246723
200141	chr1	16617450	16619399	Stable	4.43107	1.55559e-05	4.32024	0.00041966	0.0979279	0.924589
200142	chr1	16619450	16620149	Stable	3.42374	2.42794e-05	3.25932	0.000555	0.183074	0.820386
200144	chr1	16626250	16626549	Stable	2.52661	0.00154803	2.56048	0.0007964	-0.694994	0.360459
200146	chr1	16656000	16658149	Stable	3.83909	1.63138e-05	3.72221	0.00041966	-0.00414157	0.996903
200147	chr1	16664800	16665899	Stable	3.97819	1.56052e-05	5.09393	0.00041966	-0.117817	0.907132
200148	chr1	16687400	16689699	Stable	3.83153	1.58593e-05	4.0688	0.00041966	-0.0941096	0.918863
200149	chr1	17097450	17097649	Stable	2.39207	0.000280017	1.95314	0.00468764	0.546037	0.451431
200154	chr1	17480050	17480499	Stable	2.2081	0.000400979	2.65353	0.00164631	0.569343	0.366249
200155	chr1	17480950	17481099	Stable	2.57813	0.00329653	2.03691	0.00335969	-0.705808	0.443741
200156	chr1	17481600	17482149	Stable	3.34257	3.85847e-05	2.41095	0.00220534	0.571458	0.476856
200157	chr1	17483350	17483499	Stable	3.17536	0.000471323	1.90274	0.0353891	0.671621	0.355397
200159	chr1	17488400	17490599	Stable	2.65184	0.000118483	3.39318	0.000422747	-0.685139	0.264809
200160	chr1	17490650	17490749	Stable	1.78304	0.00255519	2.41083	0.00203003	-0.688535	0.357215
200163	chr1	17536700	17537999	Stable	3.69436	1.61853e-05	3.23486	0.000446826	0.523899	0.413873
200164	chr1	17538200	17539049	Stable	3.21167	2.75135e-05	3.21952	0.000464458	0.413971	0.527163
200167	chr1	17552300	17552449	Stable	1.61271	0.0153772	3.34156	0.000637964	-0.332359	0.673707
200171	chr1	17569300	17569549	Stable	3.32842	4.1806e-05	2.68078	0.0114562	0.596929	0.558722
200172	chr1	17569700	17570199	Stable	2.40817	0.000262013	3.11523	0.000610552	-0.10282	0.911278
200173	chr1	17570550	17570799	Stable	3.49388	2.28848e-05	2.03144	0.00453792	0.223662	0.794906
200174	chr1	17570850	17570999	Stable	1.62387	0.0102988	2.9788	0.00144773	-0.559833	0.486347
200176	chr1	17593450	17594199	Stable	3.79926	1.58593e-05	3.21336	0.00153634	0.621199	0.31913
200177	chr1	17594700	17594799	Stable	1.81755	0.00320802	1.68115	0.00448615	0.654541	0.297729
200178	chr1	17594900	17595399	Stable	2.31029	0.000378463	2.59494	0.00079135	0.192122	0.819717
200179	chr1	17596000	17596349	Stable	2.47947	0.000159589	2.15949	0.00998306	0.95057	0.15867
200180	chr1	17598900	17599149	Stable	2.79625	0.000627745	1.29784	0.0479304	1.3708	0.0568228
200181	chr1	17599400	17601399	Stable	3.54715	2.37359e-05	3.25551	0.000444258	0.554738	0.380765
200182	chr1	17601450	17604649	Stable	3.37704	2.12882e-05	3.79606	0.00041966	0.203648	0.796197
200183	chr1	17604900	17605099	Stable	1.73511	0.00360967	2.82684	0.000603057	-1.34375	0.0620338
200184	chr1	17605300	17606449	Stable	2.92222	5.10661e-05	3.34092	0.000453137	-0.27294	0.710669
200185	chr1	17606500	17607999	Stable	2.79349	8.13369e-05	3.85087	0.00041966	-0.692921	0.267051
200186	chr1	17608900	17609199	Stable	2.01194	0.00139067	2.71195	0.00104373	-0.383979	0.590446
200188	chr1	17628800	17628949	Stable	1.47393	0.0211863	1.75131	0.00418136	-0.618735	0.503135
200189	chr1	17629250	17629549	Stable	3.53868	2.71328e-05	3.8429	0.000909067	-0.588802	0.432964
200190	chr1	17629850	17630249	Stable	2.79446	6.66167e-05	3.61293	0.000787801	-0.265854	0.737012
200191	chr1	17637950	17638099	Stable	2.43629	0.000327862	1.28866	0.0345967	0.877214	0.176459
200192	chr1	17638250	17638499	Stable	2.04981	0.00118437	2.9703	0.000523114	-0.974868	0.159746
200193	chr1	17639750	17639949	Stable	1.49251	0.00673662	2.15684	0.00143935	-0.243799	0.744568
200197	chr1	20618750	20619349	Stable	1.80772	0.00232287	3.21303	0.000479396	-1.01965	0.145693
200198	chr1	20619800	20619999	Stable	1.47095	0.00942352	2.51221	0.000809248	-1.25317	0.0619959
200199	chr1	20674400	20674599	Stable	1.31357	0.0128825	2.69017	0.000751651	-0.589596	0.352851
200201	chr1	20677250	20677999	Stable	2.10733	0.000543442	3.71171	0.000552796	-1.26421	0.0608744
200202	chr1	20678600	20679849	Stable	2.33724	0.000393269	3.36499	0.000441979	-1.15506	0.104982
200203	chr1	20819700	20820199	Stable	3.196	7.16149e-05	3.49054	0.000421443	-0.401319	0.621918
200204	chr1	20820650	20821099	Stable	3.09905	7.58517e-05	2.4689	0.00380153	0.245902	0.767902
200205	chr1	20848350	20848649	Stable	2.21938	0.0005836	2.74156	0.00730638	-0.0326946	0.980124
200206	chr1	20870050	20870199	Stable	1.73279	0.00757419	1.73157	0.0309482	-0.291656	0.817494
200207	chr1	20870300	20870749	Stable	1.83658	0.00189245	2.90698	0.00122396	-0.883952	0.193139
200210	chr1	20890050	20890999	Stable	3.04566	4.86637e-05	3.72	0.00041966	-0.109543	0.904778
200211	chr1	20939050	20939149	Stable	2.68102	0.000450044	1.78508	0.0259273	0.156404	0.866612
200212	chr1	20939450	20939899	Stable	2.79301	7.56466e-05	2.22259	0.00281397	0.67299	0.291753
200215	chr1	20950700	20951499	Stable	3.4123	2.6567e-05	3.36911	0.000422747	-0.00281027	0.997845
200216	chr1	20951700	20952299	Stable	3.5503	3.53962e-05	3.11916	0.000740515	0.390105	0.66071
200217	chr1	20997300	20999399	Stable	3.65643	1.67435e-05	2.98198	0.000674589	0.132954	0.886386
200218	chr1	20999650	20999749	Stable	1.87146	0.0022304	2.89115	0.000615242	-0.31898	0.705569
200219	chr1	21001700	21002299	Stable	2.89843	5.9623e-05	1.70929	0.0185578	1.26245	0.124173
200220	chr1	21002450	21003249	Stable	3.12309	5.43892e-05	2.95004	0.00113208	0.727307	0.342898
200221	chr1	21006000	21012049	Stable	3.92106	1.55559e-05	3.79077	0.00041966	0.155554	0.863779
200222	chr1	21012300	21016449	Stable	3.99358	1.55559e-05	3.84537	0.00041966	0.624033	0.347414
200225	chr1	21037750	21038099	Stable	2.7217	0.000168125	2.77001	0.00508819	0.0966954	0.911764
200226	chr1	21038900	21039049	Stable	2.07471	0.000632491	2.96837	0.00183979	-0.578548	0.374813
200227	chr1	21039150	21039449	Stable	2.15189	0.000525391	2.6569	0.000890383	-0.350576	0.605632
200228	chr1	21039500	21039799	Stable	3.1878	3.00249e-05	1.9876	0.0260056	0.730305	0.4521
200229	chr1	21040050	21043349	Stable	3.54399	1.95324e-05	3.62097	0.00041966	-0.149965	0.866742
200230	chr1	21049650	21049749	Stable	1.7958	0.0019103	1.66137	0.00841152	0.0632339	0.94783
200231	chr1	21051750	21053549	Stable	3.71707	1.64873e-05	3.83911	0.00041966	0.177149	0.841524
200232	chr1	21053700	21054149	Stable	2.43855	0.000190741	3.41501	0.000711326	0.0150466	0.988231
200233	chr1	21075250	21077799	Stable	3.51757	1.86789e-05	3.06681	0.000483413	0.593724	0.357963
200234	chr1	21077900	21079249	Stable	3.92499	1.56805e-05	4.37517	0.00041966	0.16484	0.855866
200235	chr1	21079350	21080299	Stable	4.58347	1.55559e-05	4.2054	0.000450822	0.0998141	0.917295
200236	chr1	21089750	21090349	Stable	2.55228	0.000180564	2.24431	0.00119805	0.450952	0.525251
200237	chr1	21090550	21090649	Stable	2.79138	9.81898e-05	2.21373	0.0025012	0.5039	0.475936
200240	chr1	21218500	21219349	Stable	3.9895	1.84561e-05	3.8303	0.00041966	-0.0276423	0.980129
200241	chr1	23189850	23190149	Stable	2.18757	0.000776859	2.40211	0.00143241	-0.856244	0.18405
200242	chr1	23191100	23191349	Stable	1.35281	0.0242519	3.18005	0.000770474	-0.524544	0.427348
200243	chr1	23202250	23203799	Stable	2.9461	5.0618e-05	3.69222	0.00041966	-0.583406	0.35498
200245	chr1	23213700	23214649	Stable	2.39737	0.000238447	3.3396	0.000631855	-0.500592	0.496552
200246	chr1	23214700	23215649	Stable	2.20592	0.000599245	3.89143	0.00041966	-1.10839	0.109657
200247	chr1	23255550	23255999	Stable	2.78647	9.36282e-05	3.18718	0.000644716	-0.257078	0.753991
200248	chr1	23256300	23257249	Stable	2.9746	6.83841e-05	3.19251	0.000536382	0.104607	0.918215
200249	chr1	23382450	23383199	Stable	3.71349	1.77676e-05	3.83704	0.000442937	0.421807	0.598381
200250	chr1	23383450	23384049	Stable	3.56222	1.70426e-05	4.3131	0.000438207	-0.176418	0.82439
200251	chr1	23399500	23399849	Stable	2.84106	7.88677e-05	1.93548	0.0062895	0.485164	0.547398
200252	chr1	23399900	23400049	Stable	1.43927	0.0249062	2.30973	0.00242684	-1.27321	0.144586
200253	chr1	23921600	23922799	Stable	4.01978	1.57064e-05	3.73732	0.000458506	0.653134	0.405062
200254	chr1	23922850	23922999	Stable	3.35286	3.93692e-05	1.75422	0.0232933	0.583444	0.426582
200257	chr1	24004800	24006199	Stable	3.24299	2.75479e-05	3.77298	0.00041966	-0.274296	0.709788
200258	chr1	24099300	24100349	Stable	4.05218	1.56388e-05	4.13408	0.00041966	0.2816	0.74191
200259	chr1	24100500	24101099	Stable	4.05271	1.55559e-05	3.87206	0.000422791	-0.0615367	0.949097
200262	chr1	24677800	24679199	Stable	4.0662	1.55559e-05	4.40409	0.00041966	0.0569825	0.958366
200264	chr1	30778600	30778749	Stable	2.59329	0.000429115	2.47486	0.00187605	0.618167	0.349813
200265	chr1	30872450	30875299	Stable	4.16991	1.55559e-05	4.23673	0.00041966	0.295731	0.711237
200266	chr1	30875350	30875449	Stable	2.01653	0.000812247	2.71334	0.00849574	-0.30612	0.789892
200267	chr1	30948650	30951049	Stable	3.98601	1.56052e-05	4.43657	0.00041966	0.00119547	0.999107
200268	chr1	33529450	33530099	Stable	3.18912	3.99229e-05	2.67191	0.00293593	0.159234	0.889216
200269	chr1	33530250	33530549	Stable	2.91529	7.29242e-05	2.00846	0.00232768	0.0913731	0.927645
200270	chr1	33657200	33658499	Stable	3.7659	1.58959e-05	4.30693	0.00041966	-0.219288	0.785698
200271	chr1	33658550	33658749	Stable	1.76424	0.00270804	3.13625	0.000461961	-1.22381	0.0810853
200272	chr1	33669400	33669699	Stable	2.15778	0.00275608	2.89119	0.000639234	-0.474164	0.49598
200273	chr1	33669850	33670999	Stable	3.17089	5.28303e-05	3.59357	0.000454882	-0.458095	0.529479
200275	chr1	33671800	33671949	Stable	2.24063	0.00143899	2.4351	0.00733375	-1.59729	0.06141
200276	chr1	33672200	33675349	Stable	3.33433	3.2967e-05	4.06693	0.00041966	-1.00757	0.143996
200279	chr1	33688050	33688249	Stable	1.51201	0.010678	3.24413	0.000992174	-1.46357	0.0629669
200280	chr1	33688450	33689599	Stable	1.96908	0.0010601	3.65265	0.00115647	-1.10615	0.0958817
200281	chr1	33689750	33690699	Stable	2.45924	0.000296259	3.66675	0.00041966	-0.917628	0.202551
200283	chr1	33691850	33692249	Stable	1.58613	0.00647944	2.74158	0.000698906	-1.22428	0.0719298
200284	chr1	33696250	33697949	Stable	3.07708	4.35507e-05	3.66248	0.00041966	-0.846985	0.193191
200285	chr1	33719400	33721299	Stable	3.58635	2.08557e-05	4.32608	0.00041966	-0.433673	0.569359
200286	chr1	33724150	33724499	Stable	2.24332	0.000458365	2.35561	0.00139926	-0.646887	0.321255
200288	chr1	33755900	33758399	Stable	3.52103	2.2177e-05	3.96754	0.00041966	-0.110232	0.908602
200289	chr1	33792950	33793049	Stable	1.62231	0.00756398	1.12799	0.0341533	-0.460037	0.528692
200290	chr1	33807850	33808049	Stable	1.83745	0.00159704	3.31455	0.00120971	0.105332	0.905807
200291	chr1	33813250	33815199	Stable	3.73799	1.74641e-05	4.07832	0.00041966	-0.188364	0.833651
200292	chr1	33883200	33883799	Stable	2.09028	0.000597699	3.00464	0.000522362	-0.206002	0.795851
200293	chr1	33899700	33900199	Stable	2.13579	0.00101707	3.21726	0.000544855	-0.76408	0.30933
200294	chr1	33907000	33907099	Stable	1.0252	0.0461858	2.53303	0.000898467	-0.192996	0.806515
200295	chr1	33907200	33909049	Stable	3.54767	2.21625e-05	3.70725	0.000475319	0.176845	0.851983
200296	chr1	33965050	33965299	Stable	1.46191	0.00727502	2.25262	0.0016574	-1.11147	0.0970538
200297	chr1	34004900	34008099	Stable	3.20969	2.80705e-05	3.78391	0.00041966	-0.106704	0.903241
200298	chr1	34011100	34012899	Stable	4.01963	1.55559e-05	3.48116	0.000544135	0.203562	0.808481
200299	chr1	34013100	34013649	Stable	2.05916	0.00109715	2.89011	0.000842571	-0.164529	0.860787
200301	chr1	34034750	34035199	Stable	3.09687	4.95132e-05	1.6399	0.0148354	1.21045	0.112636
200304	chr1	34040900	34041999	Stable	3.32005	2.32627e-05	2.3946	0.00124349	0.922189	0.153641
200305	chr1	34042100	34042899	Stable	2.92561	0.000118708	3.16927	0.000475657	0.178362	0.831753
200306	chr1	34043050	34046349	Stable	3.67682	1.71481e-05	3.82057	0.00041966	-0.057834	0.951322
200307	chr1	34060200	34060549	Stable	3.53806	8.70083e-05	1.67329	0.00421871	0.588152	0.346466
200309	chr1	34109000	34109099	Stable	1.51788	0.0248458	2.96606	0.00137706	-0.977599	0.158256
200310	chr1	34109200	34109349	Stable	1.46766	0.00716005	2.58125	0.00728214	-1.10846	0.177551
200311	chr1	34109450	34109949	Stable	2.80386	9.42767e-05	2.51943	0.00130944	-0.0602261	0.950438
200312	chr1	34110050	34110799	Stable	2.6716	0.000102714	3.14021	0.00132429	-0.115619	0.906862
200313	chr1	34110950	34112099	Stable	3.09857	3.60559e-05	2.55762	0.00159294	0.42143	0.565538
200314	chr1	34112300	34112449	Stable	2.34973	0.000421203	1.72152	0.00486143	0.582224	0.41958
200315	chr1	34112900	34113199	Stable	3.19089	3.19097e-05	1.87824	0.0148113	0.147283	0.888319
200316	chr1	34118150	34118349	Stable	1.70478	0.00351082	2.18038	0.00210688	-0.626862	0.352851
200319	chr1	34121050	34121949	Stable	2.21832	0.000631792	3.2766	0.000942598	-0.567734	0.382364
200320	chr1	34123250	34123399	Stable	1.62231	0.00756398	2.25437	0.00228907	-1.14512	0.110142
200322	chr1	34126650	34127199	Stable	3.56977	2.52585e-05	3.40247	0.000937132	-1.02789	0.183278
200323	chr1	34127450	34128849	Stable	3.15904	7.37332e-05	3.26899	0.000478108	-0.466622	0.540591
200324	chr1	34138850	34140099	Stable	2.49914	0.000152701	4.01696	0.00041966	-0.981594	0.117992
200325	chr1	34140350	34141099	Stable	2.07353	0.000754397	2.94262	0.000861148	-0.86192	0.21123
200326	chr1	34141500	34141599	Stable	1.5989	0.00840494	2.42327	0.00920878	-0.214103	0.804709
200328	chr1	34151000	34151499	Stable	2.16615	0.000445594	3.41859	0.000602107	-1.19953	0.082069
200333	chr1	34185500	34185749	Stable	1.58167	0.00530931	2.82293	0.000810885	-0.70446	0.301478
200334	chr1	34236150	34237249	Stable	2.50537	0.000234839	3.06737	0.000480652	-0.613137	0.323952
200335	chr1	34254350	34254549	Stable	2.53956	0.000315903	2.01113	0.00661084	0.272644	0.739947
200336	chr1	34432450	34436049	Stable	3.76591	1.66256e-05	4.16394	0.00041966	-0.106629	0.90927
200337	chr1	34439000	34439199	Stable	2.36673	0.000707163	3.25694	0.00675837	0.254575	0.807118
200338	chr1	34439450	34439799	Stable	3.11517	7.20099e-05	3.14463	0.00136035	0.160173	0.882458
200339	chr1	34439950	34440449	Stable	3.09772	5.25853e-05	2.89903	0.000675953	-0.130701	0.886919
200340	chr1	34801750	34802349	Stable	2.70641	9.30996e-05	2.60116	0.00107337	0.184052	0.821388
200341	chr1	34841700	34842749	Stable	3.95081	1.62531e-05	4.55464	0.00041966	-0.135842	0.883899
200342	chr1	34842800	34844099	Stable	4.49171	1.55559e-05	4.80703	0.00041966	0.137093	0.883076
200343	chr1	34849300	34850249	Stable	3.31879	3.40558e-05	4.12384	0.00041966	0.103908	0.918902
200344	chr1	34850350	34851049	Stable	3.15767	5.26921e-05	3.00756	0.00053303	0.128975	0.896067
200345	chr1	34851100	34851699	Stable	3.50547	2.7523e-05	3.70078	0.000667742	-0.0890846	0.929346
200346	chr1	34851750	34852499	Stable	2.71969	0.00012576	3.20648	0.000473022	-0.173904	0.846532
200347	chr1	34852850	34852999	Stable	2.45396	0.000282584	2.82808	0.000763231	0.0590059	0.956862
200348	chr1	35968900	35969049	Stable	1.61599	0.00623913	3.16903	0.000808216	-0.0954296	0.931369
200351	chr1	35993250	35993399	Stable	2.73991	0.000640987	1.97108	0.00343878	0.966822	0.169858
200352	chr1	36015750	36015899	Stable	3.10852	6.4508e-05	2.18836	0.00143362	0.92111	0.149947
200353	chr1	36016550	36017149	Stable	3.12686	5.3321e-05	2.98882	0.00149537	0.404026	0.62069
200354	chr1	36017250	36019249	Stable	3.58663	2.00772e-05	3.50709	0.000530253	0.471067	0.529244
200357	chr1	36029350	36029599	Stable	2.27429	0.000584259	2.88614	0.000648706	-0.551418	0.394455
200358	chr1	36029650	36030549	Stable	3.54936	1.99395e-05	3.02631	0.00198039	0.303844	0.702267
200359	chr1	36030700	36031449	Stable	3.25229	3.22149e-05	3.5246	0.000443428	0.0567984	0.957017
200361	chr1	36059950	36061199	Stable	2.50091	0.000193098	3.58356	0.000425502	-0.255639	0.75692
200362	chr1	36061850	36062049	Stable	1.98091	0.004629	2.55923	0.00294799	-0.300928	0.747522
200363	chr1	36062150	36062399	Stable	2.62357	0.000190808	2.7554	0.00164761	-0.104588	0.923991
200364	chr1	36062600	36062749	Stable	2.44091	0.001411	1.55292	0.0364842	0.597327	0.498027
200365	chr1	36063650	36063899	Stable	2.29794	0.000781959	3.00823	0.000664786	0.954439	0.157549
200366	chr1	36064200	36065049	Stable	3.72107	1.64235e-05	2.93019	0.000681085	0.529457	0.458769
200367	chr1	36065200	36065949	Stable	3.52648	1.75743e-05	1.98326	0.00346101	0.255797	0.748071
200368	chr1	36067500	36067649	Stable	2.84368	8.51024e-05	2.01524	0.00218274	0.513893	0.433206
200369	chr1	36067750	36069699	Stable	3.40751	2.45429e-05	3.34441	0.000790114	0.343061	0.645655
200370	chr1	36070500	36070649	Stable	1.78716	0.00256973	2.05319	0.00454756	0.415178	0.560335
200371	chr1	36087200	36090949	Stable	3.41868	2.19754e-05	2.793	0.000630552	1.02129	0.121119
200373	chr1	36095000	36096199	Stable	3.12556	5.71092e-05	2.38064	0.00227183	0.864014	0.169653
200374	chr1	36115700	36116649	Stable	2.20957	0.000406134	3.46685	0.00041966	-0.715037	0.252548
200375	chr1	36116800	36117549	Stable	2.45541	0.000200922	3.69502	0.000436891	-1.19084	0.0721621
200376	chr1	36117800	36117949	Stable	1.33898	0.012901	2.76699	0.00275637	-0.988069	0.143822
200377	chr1	36118200	36118599	Stable	2.11274	0.000555957	2.784	0.000653947	-0.731221	0.249213
200378	chr1	36236250	36236549	Stable	1.36964	0.0129265	3.16807	0.000516386	-1.06331	0.11904
200379	chr1	36243600	36244399	Stable	3.33637	2.60639e-05	3.80371	0.00041966	-0.139465	0.874517
200380	chr1	36244450	36245399	Stable	3.15758	4.10496e-05	3.52337	0.00041966	-0.38855	0.601145
200381	chr1	36307300	36307499	Stable	2.54267	0.000149799	1.73388	0.0087173	0.521602	0.48138
200382	chr1	36307750	36308499	Stable	2.925	7.51891e-05	2.75006	0.00155114	0.0325085	0.975699
200383	chr1	36326500	36326849	Stable	2.50487	0.000282677	3.06823	0.000525318	-0.878695	0.21302
200384	chr1	36368350	36369149	Stable	3.88366	1.7957e-05	4.05152	0.00041966	0.178069	0.847309
200386	chr1	36444600	36445349	Stable	3.0078	5.24182e-05	3.37264	0.000455779	0.357776	0.646062
200387	chr1	36445500	36446049	Stable	2.84853	7.02658e-05	2.91932	0.000535454	0.29151	0.69624
200388	chr1	36456850	36457499	Stable	2.97066	4.85204e-05	3.032	0.00202331	0.46361	0.597347
200389	chr1	36457550	36458349	Stable	3.35701	2.7418e-05	2.59524	0.00113186	0.413233	0.558644
200390	chr1	36470850	36471549	Stable	4.02233	1.55559e-05	4.34065	0.00041966	0.211466	0.805029
200391	chr1	36471750	36472549	Stable	3.45288	2.57983e-05	2.92041	0.000779774	0.228543	0.777214
200392	chr1	36475500	36476049	Stable	2.87056	6.96104e-05	2.55893	0.000905399	0.43845	0.523616
200393	chr1	36476400	36476499	Stable	1.55836	0.00730729	1.26348	0.0379413	0.606131	0.417684
200394	chr1	36511850	36512299	Stable	4.47792	1.55559e-05	3.37713	0.00186077	0.6244	0.468566
200395	chr1	36546350	36547199	Stable	3.52146	2.02678e-05	3.54062	0.00041966	0.240236	0.762866
200396	chr1	36547450	36548099	Stable	3.44986	5.91416e-05	2.23921	0.00246359	0.841328	0.300069
200397	chr1	36548300	36548699	Stable	3.84168	1.68557e-05	1.75447	0.00366593	1.41638	0.0602366
200398	chr1	36555250	36558399	Stable	4.24858	1.55559e-05	4.43811	0.00041966	-0.0279531	0.98021
200400	chr1	36563600	36564099	Stable	2.39797	0.000260073	2.26163	0.00115622	0.151962	0.853009
200402	chr1	36566000	36566399	Stable	2.29198	0.000312538	2.74729	0.00187828	0.176725	0.835937
200403	chr1	36568550	36568799	Stable	2.39202	0.000330467	2.69429	0.000785667	0.111343	0.903605
200404	chr1	36569200	36569349	Stable	1.38997	0.0241948	2.73381	0.00161962	-0.422721	0.613051
200405	chr1	36569500	36569999	Stable	2.89839	7.32464e-05	2.23419	0.00295595	0.355982	0.625845
200406	chr1	36580000	36581299	Stable	3.25086	3.52377e-05	2.96711	0.00115394	0.428304	0.554045
200407	chr1	36583400	36583499	Stable	1.98199	0.00100071	1.34719	0.0196984	1.0242	0.105614
200411	chr1	36587550	36587699	Stable	1.8705	0.00244011	1.57368	0.0177389	0.827938	0.273165
200414	chr1	36603800	36603899	Stable	1.66906	0.00305405	2.31009	0.00128749	0.432693	0.513337
200415	chr1	36604000	36604099	Stable	3.52616	3.10256e-05	1.07938	0.0387357	1.08332	0.120822
200416	chr1	36690850	36691399	Stable	3.61343	1.73319e-05	3.23184	0.000483356	0.310876	0.685075
200417	chr1	36691500	36692349	Stable	3.68134	1.89198e-05	4.06924	0.000420469	-0.0439592	0.968466
200418	chr1	36708900	36710049	Stable	3.25272	2.90113e-05	4.14752	0.00041966	-0.163908	0.853457
200419	chr1	36710150	36710599	Stable	3.23033	3.16959e-05	3.34565	0.000493059	-0.0729425	0.940781
200424	chr1	36937250	36937399	Stable	2.19476	0.000590517	1.71009	0.0159873	-0.0133577	0.991285
200425	chr1	36937600	36937799	Stable	2.35368	0.000291381	2.79655	0.000839921	-0.363036	0.603673
200427	chr1	36938500	36940499	Stable	4.54145	1.55559e-05	4.27605	0.00041966	0.204158	0.820803
200428	chr1	37299650	37299749	Stable	1.36492	0.0123456	2.46014	0.00139335	-1.40224	0.0592339
200429	chr1	37299850	37300499	Stable	3.61825	2.71908e-05	3.28748	0.000766724	0.311462	0.717567
200430	chr1	37429250	37430949	Stable	3.60337	2.13971e-05	3.496	0.000526907	0.163597	0.86675
200431	chr1	37864350	37864899	Stable	3.2759	3.23604e-05	3.31427	0.000461234	0.381499	0.619166
200432	chr1	37865350	37866349	Stable	3.22408	3.1612e-05	4.0271	0.000544006	0.0306238	0.975913
200433	chr1	37866500	37866649	Stable	2.33364	0.000498972	2.6938	0.00851946	0.0969214	0.911307
200434	chr1	37870700	37870949	Stable	1.18712	0.0260743	3.40044	0.0131326	-0.710415	0.277788
200435	chr1	37871150	37872249	Stable	2.94885	6.76239e-05	3.71676	0.00044303	-0.247045	0.765865
200436	chr1	37872350	37873399	Stable	2.94445	7.32438e-05	3.73616	0.00041966	-0.497246	0.496552
200437	chr1	37889750	37890399	Stable	3.05841	4.20442e-05	2.99219	0.000521838	-0.0220856	0.983134
200438	chr1	37890500	37891049	Stable	2.68643	0.000103569	3.4348	0.000422791	-0.479753	0.471556
200439	chr1	37972150	37972299	Stable	3.22807	0.000149175	2.30204	0.0019361	0.0807266	0.938234
200440	chr1	37996350	37998999	Stable	4.04145	1.55559e-05	3.99729	0.00041966	-0.0376957	0.970953
200441	chr1	38038250	38038399	Stable	1.30507	0.0212354	2.28065	0.00219162	-0.928471	0.201961
200444	chr1	38081050	38081349	Stable	1.59729	0.00624039	2.17628	0.00330903	-0.784654	0.262483
200446	chr1	38128650	38129749	Stable	4.48429	1.55559e-05	4.35844	0.00043868	0.836348	0.290135
200447	chr1	38129850	38131199	Stable	4.35552	1.55559e-05	3.16347	0.000467626	0.342764	0.638567
200450	chr1	38202350	38202849	Stable	3.29381	4.4318e-05	1.283	0.0199519	1.14309	0.0967633
200451	chr1	38203150	38203549	Stable	2.92393	5.38219e-05	2.21191	0.00150685	0.975021	0.13703
200452	chr1	38212950	38213299	Stable	3.01059	4.59152e-05	1.75447	0.00366593	1.18816	0.0723098
200455	chr1	38221300	38221749	Stable	2.77606	7.26256e-05	2.45172	0.000946866	0.431187	0.519217
200457	chr1	38240750	38241199	Stable	1.91785	0.00121051	2.89958	0.00101383	-0.154416	0.862635
200458	chr1	38241250	38241599	Stable	3.34302	5.42558e-05	2.1914	0.00328474	0.786743	0.203665
200459	chr1	38241850	38242299	Stable	2.69531	8.58935e-05	2.88252	0.00137728	0.351388	0.609017
200460	chr1	38246850	38247899	Stable	3.10292	3.36738e-05	2.50056	0.00136208	0.261931	0.737362
200461	chr1	38248350	38248999	Stable	2.6436	0.000143742	3.03536	0.00167052	0.314742	0.680094
200464	chr1	38258950	38262099	Stable	3.67355	1.61828e-05	2.66094	0.000879773	1.10413	0.0911275
200465	chr1	38262700	38264599	Stable	3.82205	1.55559e-05	3.20449	0.000555155	1.14167	0.0856856
200468	chr1	38291300	38291949	Stable	3.30973	2.86284e-05	2.80175	0.00289877	0.0858401	0.936522
200469	chr1	38292850	38293349	Stable	2.47054	0.000175036	2.74975	0.000685738	0.0433562	0.964007
200471	chr1	38293750	38293949	Stable	1.29943	0.0190495	3.20777	0.00162324	-0.746097	0.359658
200473	chr1	38298000	38298199	Stable	3.01866	4.34795e-05	1.10383	0.0246996	1.32428	0.0549511
200474	chr1	38304100	38305199	Stable	3.31424	3.43209e-05	3.28618	0.000494726	0.19053	0.815632
200475	chr1	38307050	38307449	Stable	2.84927	0.000535208	2.08081	0.00630852	0.779047	0.262686
200476	chr1	38307500	38308699	Stable	3.43836	2.05781e-05	2.7761	0.000834401	1.02548	0.106509
200477	chr1	38309100	38310149	Stable	2.69044	9.28697e-05	2.60256	0.000701555	0.246505	0.739246
200478	chr1	38310500	38310799	Stable	2.83838	0.000185343	2.33965	0.00120892	0.00515165	0.996137
200479	chr1	38311000	38311199	Stable	1.98454	0.00112654	3.4101	0.000498284	-0.0149112	0.989104
200480	chr1	38318300	38318399	Stable	3.06226	0.000122662	1.8738	0.023793	0.408216	0.653158
200482	chr1	38334150	38334649	Stable	2.33598	0.000432348	2.84562	0.000580712	0.452508	0.523051
200483	chr1	38357150	38357899	Stable	3.59224	1.991e-05	1.61072	0.00664166	1.20488	0.0693335
200485	chr1	38358800	38359399	Stable	3.10789	5.71126e-05	2.12271	0.00458937	1.24454	0.0698844
200486	chr1	38387850	38388149	Stable	2.67519	0.000278439	1.9379	0.00242042	0.479633	0.481111
200489	chr1	38392750	38392999	Stable	3.02364	5.76248e-05	1.82365	0.00764103	0.948964	0.15671
200490	chr1	38393300	38393399	Stable	1.58081	0.00487947	2.5195	0.00494576	0.421769	0.628371
200492	chr1	38393900	38394099	Stable	2.15661	0.000768223	2.42858	0.00140623	0.612381	0.412961
200495	chr1	38402000	38402249	Stable	2.62647	0.00019879	2.11689	0.00566211	0.0302082	0.979734
200497	chr1	38511850	38512149	Stable	2.91741	6.7639e-05	1.71071	0.0108565	1.29321	0.0734647
200503	chr1	38547350	38547449	Stable	1.51467	0.0107519	1.63164	0.0048573	0.130113	0.876966
200504	chr1	38547650	38547949	Stable	2.88867	5.31266e-05	1.79951	0.00385789	0.943204	0.139682
200505	chr1	38548250	38548449	Stable	1.99534	0.00107959	2.22974	0.00332166	0.0733574	0.945529
200506	chr1	38548900	38549199	Stable	2.90858	7.09534e-05	1.96407	0.0045432	0.161014	0.86494
200507	chr1	38549500	38549649	Stable	2.20079	0.00205594	2.55353	0.0132969	0.577836	0.527987
200530	chr1	38700800	38701249	Stable	2.93806	7.14867e-05	1.4234	0.00936631	1.33379	0.050843
200565	chr1	38987100	38987649	Stable	3.30317	3.19484e-05	3.66824	0.000644008	0.131026	0.890212
200566	chr1	38987700	38988849	Stable	3.87054	1.56388e-05	3.7931	0.00041966	-0.00247148	0.9982
200567	chr1	39255550	39258099	Stable	3.29693	2.85879e-05	3.79265	0.000428779	-0.819559	0.216213
200568	chr1	39281350	39283499	Stable	2.27808	0.000357409	3.52522	0.000421443	-1.08401	0.104279
200569	chr1	39283700	39284249	Stable	2.13856	0.00194432	2.80625	0.000659173	-0.990673	0.128273
200570	chr1	39287350	39287899	Stable	3.07677	9.75512e-05	2.91494	0.000583163	0.183955	0.854215
200571	chr1	39307600	39308149	Stable	1.31972	0.0198419	2.95752	0.000646791	-0.993718	0.165581
200572	chr1	39366950	39367699	Stable	3.71806	1.82371e-05	3.51788	0.000461899	0.0623323	0.94652
200573	chr1	39367850	39369499	Stable	4.26341	1.55559e-05	4.15775	0.00041966	-0.00484126	0.99678
200574	chr1	39398750	39398999	Stable	2.27992	0.000666337	2.34622	0.00419657	0.0434979	0.964219
200575	chr1	39479200	39479299	Stable	2.38796	0.00205228	1.74737	0.00690295	0.114898	0.937594
200576	chr1	39534900	39535599	Stable	3.65546	2.0708e-05	3.16046	0.000463178	-0.381682	0.572816
200577	chr1	39535700	39536549	Stable	3.97474	1.68675e-05	3.61822	0.000479166	-0.069507	0.947931
200578	chr1	39554900	39555049	Stable	1.55966	0.00933764	2.1728	0.00177458	0.113968	0.898872
200579	chr1	39555350	39556249	Stable	2.42099	0.000194366	3.56255	0.00041966	-1.22015	0.0659297
200580	chr1	39556300	39556949	Stable	2.03075	0.00143938	3.21604	0.000510679	-0.763803	0.273226
200581	chr1	39575900	39575999	Stable	1.71826	0.00248156	2.01629	0.00390471	-1.12268	0.0884645
200582	chr1	39576050	39578799	Stable	3.79215	1.59611e-05	4.11303	0.00041966	0.0101401	0.992692
200583	chr1	39676900	39677249	Stable	2.89771	7.16244e-05	2.46745	0.00227848	0.0290514	0.979563
200584	chr1	39686950	39687249	Stable	3.05567	5.83016e-05	3.2939	0.000609054	-0.900705	0.199737
200585	chr1	39687450	39687649	Stable	1.85125	0.003592	2.50024	0.00114582	-0.606989	0.450772
200586	chr1	39713600	39714149	Stable	1.76434	0.00362854	3.58134	0.000472754	-0.856028	0.24132
200587	chr1	39714200	39714349	Stable	1.9581	0.00307289	2.21518	0.00862352	-0.874132	0.318504
200589	chr1	39758700	39759849	Stable	2.45681	0.000201495	3.4414	0.00041966	-1.02672	0.10676
200590	chr1	39760050	39763049	Stable	3.68965	1.71026e-05	4.13216	0.00041966	-0.333208	0.658825
200595	chr1	39899850	39903599	Stable	4.05817	1.55559e-05	4.24575	0.00041966	-0.0546004	0.959168
200596	chr1	40033450	40033549	Stable	1.64666	0.0184886	3.26486	0.00132954	-0.763924	0.375109
200598	chr1	40139450	40140899	Stable	2.54374	0.000133154	2.92649	0.000513886	-0.329222	0.632792
200599	chr1	40171800	40171949	Stable	2.28591	0.00108451	2.4712	0.00392935	-0.135089	0.905315
200600	chr1	40172450	40172549	Stable	2.82856	0.000293329	1.64037	0.0353891	0.551843	0.556268
200601	chr1	40173800	40174149	Stable	2.62276	0.000144115	2.1698	0.00259935	-0.262127	0.73509
200602	chr1	40174850	40174999	Stable	1.47946	0.0136243	2.71163	0.00274838	-0.244171	0.788622
200603	chr1	40179400	40179749	Stable	2.51639	0.000380592	3.16503	0.00075924	-0.324633	0.638929
200604	chr1	40187750	40188649	Stable	2.28261	0.000399091	2.97905	0.00197834	-0.518656	0.44642
200605	chr1	40221450	40222399	Stable	2.85419	9.12543e-05	3.30909	0.000509181	0.194357	0.835268
200606	chr1	40222500	40224149	Stable	3.44452	2.09674e-05	3.32604	0.000447699	0.179367	0.832176
200607	chr1	40224250	40226549	Stable	3.84825	1.55559e-05	3.92557	0.00041966	-0.24468	0.752981
200609	chr1	40228400	40228549	Stable	2.32721	0.000425772	2.26811	0.00175379	0.263761	0.730919
200610	chr1	40230350	40230499	Stable	1.82061	0.00388652	2.5289	0.00424366	-0.0477146	0.96306
200611	chr1	40230650	40230799	Stable	2.64221	0.000114016	1.61771	0.00983081	0.522674	0.438653
200612	chr1	40232400	40235799	Stable	2.8441	6.20389e-05	3.72938	0.00041966	-0.59928	0.347412
200613	chr1	40235850	40237299	Stable	2.67361	9.8349e-05	3.79646	0.00041966	-0.785437	0.218125
200615	chr1	40237600	40237749	Stable	2.56034	0.000704471	2.32162	0.00132366	-0.137379	0.881281
200616	chr1	40252100	40252549	Stable	1.43858	0.0104183	3.03623	0.00116444	-1.16897	0.0962034
200619	chr1	40262350	40262549	Stable	2.50563	0.000170957	1.55655	0.00631766	0.531314	0.420656
200620	chr1	40262650	40263549	Stable	3.32312	2.44093e-05	3.68747	0.000456777	0.320424	0.660405
200621	chr1	40263900	40264549	Stable	3.2938	2.56722e-05	3.01371	0.000711891	0.362658	0.635286
200622	chr1	40265100	40267999	Stable	3.92741	1.56394e-05	3.87312	0.00041966	0.105877	0.913802
200623	chr1	40268550	40268799	Stable	2.63124	0.000120628	1.60919	0.0219556	0.761053	0.237315
200624	chr1	40274900	40276749	Stable	3.1579	3.64954e-05	3.42162	0.000422747	-0.0125315	0.99011
200625	chr1	40323700	40326299	Stable	3.91115	1.58356e-05	3.91083	0.00041966	-0.0672294	0.946624
200627	chr1	40358400	40358649	Stable	2.67557	0.000246	2.40285	0.00172785	-0.437821	0.552266
200628	chr1	40358800	40359099	Stable	1.34263	0.0154093	3.27975	0.000446686	-1.23838	0.0653544
200629	chr1	40359250	40359899	Stable	2.27719	0.000370598	2.90406	0.000613528	-1.15841	0.087179
200630	chr1	40360350	40360599	Stable	1.8652	0.00507042	3.73457	0.00041966	-1.37539	0.116063
200631	chr1	40361800	40361999	Stable	1.99446	0.00262094	4.29673	0.000459832	-1.259	0.0778667
200633	chr1	40373750	40373899	Stable	1.60942	0.00437848	1.90351	0.00309193	-0.941303	0.143869
200634	chr1	40378500	40378749	Stable	1.47109	0.0071398	1.951	0.00274915	-0.440546	0.504973
200635	chr1	40379650	40380099	Stable	1.97921	0.00100753	2.3065	0.00134394	-0.566125	0.380541
200636	chr1	40380200	40381549	Stable	3.08024	3.57413e-05	3.67402	0.00041966	-0.548047	0.386559
200638	chr1	40382100	40382299	Stable	1.6121	0.00613266	2.25849	0.00631538	-0.609253	0.465189
200639	chr1	40382700	40382999	Stable	1.66303	0.00950358	2.99524	0.000521036	-1.13065	0.178697
200641	chr1	40384950	40385749	Stable	2.19428	0.000453211	3.54775	0.00041966	-0.934583	0.143484
200646	chr1	40400500	40400599	Stable	1.54477	0.00763999	3.07395	0.00051253	-0.65498	0.303354
200647	chr1	40400850	40401049	Stable	2.87852	0.000416303	2.64433	0.00330481	-0.865597	0.165273
200648	chr1	40401150	40401899	Stable	2.11635	0.00125697	2.72573	0.00063064	-0.906017	0.148831
200650	chr1	40413500	40414199	Stable	2.1027	0.000732404	2.92845	0.000756766	-0.281642	0.731361
200651	chr1	40414500	40414649	Stable	1.71752	0.00247979	2.43404	0.00206684	0.238883	0.748186
200652	chr1	40414900	40415999	Stable	2.2932	0.00029971	3.24815	0.000473685	-0.668596	0.28447
200653	chr1	40417350	40417549	Stable	1.50719	0.0077222	2.69871	0.000828006	-1.13824	0.0980772
200654	chr1	40419700	40419899	Stable	1.81613	0.00306961	3.46436	0.00177498	-0.51892	0.432331
200656	chr1	40427500	40427749	Stable	1.94148	0.00703495	2.74966	0.000763231	-0.915368	0.314076
200659	chr1	40430900	40431449	Stable	1.36523	0.0108308	2.8635	0.00053303	-1.32675	0.0514122
200663	chr1	40435800	40446349	Stable	3.67024	1.62349e-05	4.62769	0.00041966	-0.840977	0.182923
200664	chr1	40446500	40447299	Stable	2.93577	5.33407e-05	2.95921	0.00119429	-0.143159	0.884806
200665	chr1	40447400	40448199	Stable	3.38944	3.08427e-05	3.09248	0.000459796	-0.0861039	0.923968
200666	chr1	40448500	40449199	Stable	2.73029	8.14633e-05	2.89886	0.000695647	-0.0414353	0.965234
200667	chr1	40449300	40449549	Stable	2.25973	0.000948377	2.98149	0.00153517	0.239532	0.757423
200668	chr1	40449750	40449999	Stable	1.79454	0.00274125	2.77709	0.000610988	-0.681799	0.310072
200669	chr1	40466200	40466399	Stable	1.10831	0.035678	3.55274	0.00122636	-0.687189	0.277142
200670	chr1	40468350	40468449	Stable	2.52887	0.00060234	1.56136	0.0242002	-0.839856	0.373353
200671	chr1	40469200	40469399	Stable	2.64706	0.000101004	1.92909	0.00341981	-0.603131	0.359971
200673	chr1	40471650	40471799	Stable	2.05044	0.000936361	2.68932	0.00158285	0.0423264	0.967164
200674	chr1	40471850	40472449	Stable	2.80048	7.04429e-05	2.90659	0.00174651	-0.489539	0.468352
200675	chr1	40472750	40473599	Stable	2.01256	0.000933885	2.99714	0.000556236	-0.878325	0.159377
200676	chr1	40515050	40515749	Stable	2.38096	0.000347055	3.0868	0.000582399	-1.0408	0.132898
200677	chr1	40543250	40543349	Stable	2.2821	0.000458968	2.09202	0.0100252	-0.135597	0.884798
200678	chr1	40544100	40544699	Stable	2.84251	6.92577e-05	2.67897	0.000816797	-0.124727	0.889346
200679	chr1	40585850	40587049	Stable	1.59805	0.00456224	3.45574	0.000448146	-1.19011	0.0812781
200681	chr1	40600150	40601199	Stable	2.44021	0.000201919	3.17493	0.0004635	-0.404069	0.562784
200682	chr1	40601250	40601499	Stable	2.35403	0.000459591	2.59689	0.00131669	-0.341092	0.66199
200683	chr1	40601750	40602199	Stable	2.11096	0.000533118	3.84928	0.000424869	-0.859347	0.165444
200684	chr1	40772800	40773299	Stable	2.11964	0.00551298	2.98496	0.000513667	-1.43019	0.0780783
200685	chr1	40773550	40774399	Stable	2.36411	0.000291539	3.02529	0.000757756	-0.784205	0.273987
200686	chr1	40775200	40775849	Stable	2.26641	0.00108892	2.84375	0.000696278	-1.04068	0.108678
200687	chr1	40786400	40786549	Stable	1.20247	0.0209851	2.34947	0.00149127	-1.05898	0.100188
200690	chr1	40788600	40791749	Stable	3.71074	1.79081e-05	4.10659	0.00041966	-0.486358	0.500687
200691	chr1	40792100	40792499	Stable	2.17641	0.00112174	3.34074	0.000557325	-0.618411	0.471576
200692	chr1	40792650	40793899	Stable	3.30684	4.02469e-05	2.7867	0.000717724	-0.218078	0.813043
200693	chr1	40794000	40794349	Stable	3.36567	2.19111e-05	4.51295	0.00133949	-0.474484	0.463149
200694	chr1	40794700	40794949	Stable	2.57906	0.000287669	2.4799	0.0011624	-0.134063	0.896591
200695	chr1	40798750	40798999	Stable	2.13922	0.00223721	3.39577	0.000902954	-0.636359	0.414197
200696	chr1	40802350	40802849	Stable	2.79738	0.000148246	2.62165	0.000768516	-0.156064	0.852865
200697	chr1	40803250	40803499	Stable	1.66748	0.00633941	2.44182	0.00228445	-0.422285	0.658203
200698	chr1	40808650	40808749	Stable	1.77142	0.00659135	2.34694	0.00246629	-0.714152	0.263072
200699	chr1	40824450	40825049	Stable	2.55863	0.000188513	3.26762	0.00048376	-0.678567	0.330798
200700	chr1	40825100	40825249	Stable	1.14566	0.0437254	2.13253	0.00442109	-0.654735	0.456387
200701	chr1	40825400	40825649	Stable	2.299	0.000758237	3.04168	0.000527689	-0.704554	0.284927
200702	chr1	40825750	40826099	Stable	1.72274	0.00701116	2.56586	0.000770474	-0.379263	0.587146
200704	chr1	40834050	40834149	Stable	2.20223	0.000527279	3.38389	0.000828006	-0.282269	0.772438
200705	chr1	40834350	40835499	Stable	2.19549	0.000425381	4.01197	0.000421612	-0.780913	0.244612
200706	chr1	40835900	40840649	Stable	3.26478	3.00655e-05	3.65514	0.00041966	-0.46157	0.502917
200707	chr1	40840750	40849849	Stable	3.37467	2.73734e-05	3.82139	0.00041966	-0.366235	0.629591
200708	chr1	40850200	40850549	Stable	2.2358	0.00035586	3.20933	0.000525827	-0.656144	0.299391
200709	chr1	40850800	40851099	Stable	1.3105	0.0216017	2.72991	0.000773152	-1.07007	0.117157
200710	chr1	40851150	40851349	Stable	1.69183	0.00775793	2.95708	0.0101999	-0.584316	0.629094
200711	chr1	40851450	40852099	Stable	2.64964	0.000118537	3.35548	0.000426343	-0.650732	0.322702
200712	chr1	40852150	40852399	Stable	1.23197	0.0231033	2.71433	0.00186443	-1.19183	0.0842541
200713	chr1	40852750	40852849	Stable	3.01473	4.59152e-05	1.33793	0.0257619	-0.508153	0.501769
200714	chr1	40853550	40853799	Stable	1.77624	0.00795099	3.03457	0.000548088	-1.37412	0.0647245
200716	chr1	40854350	40854949	Stable	2.2817	0.000423462	3.02019	0.000477643	-1.10627	0.0934329
200717	chr1	40855000	40855549	Stable	2.4876	0.000192888	3.01451	0.000609526	-0.523752	0.421257
200718	chr1	40855900	40856949	Stable	2.01114	0.000791208	3.31365	0.000423014	-1.07673	0.0936919
200719	chr1	40857150	40857349	Stable	2.23032	0.000887618	2.51871	0.000841331	-0.652817	0.312823
200720	chr1	40857600	40858049	Stable	2.1876	0.000556229	3.3789	0.00130272	-0.708122	0.37746
200721	chr1	40858150	40858299	Stable	2.24309	0.001012	2.61563	0.00154901	-0.617552	0.335219
200724	chr1	40873550	40873849	Stable	3.21123	3.46284e-05	1.37212	0.0335083	0.287204	0.700671
200726	chr1	40878450	40879249	Stable	1.96023	0.00209123	3.57982	0.000613977	-0.4122	0.606409
200727	chr1	40879350	40879999	Stable	2.73103	0.000137515	3.01299	0.000674589	-0.0342389	0.976682
200728	chr1	40884100	40884199	Stable	1.91569	0.00170093	1.69715	0.00689118	-0.480581	0.497549
200731	chr1	41002250	41002349	Stable	2.21078	0.00344505	3.44791	0.000421443	-0.371694	0.681773
200732	chr1	41002650	41002749	Stable	2.01129	0.000869652	1.53574	0.016807	-0.159618	0.85231
200735	chr1	41034400	41036549	Stable	2.90612	5.76548e-05	3.73015	0.00041966	-0.6938	0.276888
200737	chr1	41131450	41131649	Stable	3.41537	4.50158e-05	1.4589	0.0380978	0.296726	0.676216
200738	chr1	41132700	41136049	Stable	2.8588	7.55901e-05	3.74685	0.00041966	-0.86229	0.194486
200740	chr1	41137950	41138599	Stable	2.52711	0.000178674	2.98274	0.000514882	-0.829543	0.183584
200741	chr1	41138900	41146749	Stable	3.2249	3.81712e-05	4.07085	0.00041966	-0.639732	0.359797
200742	chr1	41152150	41152549	Stable	1.49905	0.00883512	3.29818	0.000476952	-1.04428	0.107221
200743	chr1	42851250	42852099	Stable	3.8318	1.9964e-05	3.52255	0.00041966	0.0463282	0.967165
200744	chr1	43091850	43093299	Stable	3.70977	1.72074e-05	3.42839	0.000442239	0.469818	0.524031
200745	chr1	43097600	43099399	Stable	3.92407	1.58593e-05	4.42706	0.00041966	0.0521257	0.961196
200746	chr1	43128000	43128149	Stable	1.9735	0.00421451	2.25638	0.00495386	-0.979537	0.264478
200747	chr1	43128850	43129099	Stable	1.4378	0.0123547	2.36412	0.00105368	-0.963228	0.135861
200748	chr1	43140000	43140399	Stable	2.60146	0.000172019	2.87433	0.000793422	-0.0647369	0.948045
200749	chr1	43140850	43140999	Stable	1.72785	0.00353465	2.2495	0.00493419	-0.614719	0.39955
200750	chr1	43141200	43142599	Stable	2.95615	5.48164e-05	3.01461	0.000522454	-0.120359	0.894411
200751	chr1	43142950	43143299	Stable	2.59216	0.000126828	3.09432	0.00140116	0.148715	0.862321
200752	chr1	43143350	43143799	Stable	3.08049	4.02277e-05	2.38942	0.00561313	0.546355	0.479241
200753	chr1	43143850	43144249	Stable	2.54619	0.000405296	2.94424	0.00136408	0.405686	0.631044
200754	chr1	43144400	43149599	Stable	3.12535	3.45994e-05	3.93983	0.00041966	-0.505201	0.43616
200755	chr1	43150200	43150449	Stable	1.8074	0.00176821	2.85683	0.000662586	-0.125284	0.887554
200756	chr1	43150500	43150649	Stable	2.7147	0.000572429	3.19127	0.00136958	-0.194985	0.802978
200759	chr1	43153650	43153949	Stable	2.85341	0.000351711	1.80479	0.00522091	0.623662	0.344461
200760	chr1	43154550	43155249	Stable	3.06982	3.64956e-05	1.65375	0.00534667	0.781961	0.204573
200763	chr1	43157200	43157399	Stable	2.70461	0.000102501	1.69783	0.0113679	1.12999	0.10039
200764	chr1	43157450	43157599	Stable	2.11991	0.000629826	1.69273	0.00766928	0.595462	0.388213
200765	chr1	43158150	43159649	Stable	2.92616	4.89158e-05	1.91114	0.00285536	0.861672	0.166071
200766	chr1	43159700	43160699	Stable	3.0687	4.2838e-05	3.04765	0.00053557	0.195941	0.804574
200767	chr1	43160900	43160999	Stable	1.46282	0.0105236	3.14535	0.00651581	-0.537737	0.432829
200768	chr1	43161050	43161399	Stable	2.31259	0.000302043	2.34807	0.00113668	0.146903	0.865684
200769	chr1	43161800	43161949	Stable	2.63699	0.000181648	2.19305	0.00182195	0.173301	0.831311
200770	chr1	43162000	43164649	Stable	3.72601	2.19139e-05	3.96661	0.00041966	0.246157	0.797637
200771	chr1	43167750	43167899	Stable	2.45963	0.000184945	2.87785	0.00765485	-0.0156017	0.989044
200772	chr1	43168100	43170649	Stable	2.90788	6.00654e-05	3.57324	0.000433183	-0.665301	0.305707
200773	chr1	43174150	43174249	Stable	2.40866	0.00036144	2.08839	0.00199682	-0.674818	0.320893
200774	chr1	43174350	43174499	Stable	2.32429	0.000263364	2.61176	0.000909591	0.221974	0.780475
200777	chr1	43201850	43201949	Stable	2.35513	0.00296495	1.75244	0.0402204	-0.385493	0.733894
200779	chr1	43218300	43218649	Stable	2.74763	0.000105884	2.66115	0.00179315	-0.126979	0.885938
200780	chr1	43218900	43218999	Stable	2.45145	0.000214338	1.42795	0.0219557	0.370639	0.647092
200781	chr1	43222300	43222449	Stable	1.20225	0.027377	3.29857	0.00168466	-1.26085	0.08253
200782	chr1	43223650	43226199	Stable	3.41404	2.16424e-05	3.65836	0.00041966	-0.432289	0.520785
200783	chr1	43235750	43238199	Stable	3.35002	2.77224e-05	2.78528	0.000620507	0.511086	0.467507
200784	chr1	43238550	43238799	Stable	2.88009	8.46349e-05	3.42506	0.000504055	0.622606	0.317819
200785	chr1	43238900	43239099	Stable	2.18291	0.000528056	1.80475	0.00544818	0.126143	0.890414
200787	chr1	43245550	43246099	Stable	3.50629	2.53956e-05	2.07218	0.0108968	1.16369	0.13051
200788	chr1	43246850	43246999	Stable	2.48858	0.000238726	1.41216	0.0090802	1.29529	0.0581807
200790	chr1	43255900	43256049	Stable	2.25412	0.00048869	2.63861	0.00913015	0.458498	0.65559
200791	chr1	43256200	43256499	Stable	1.45983	0.0134381	3.82626	0.00166903	-0.328248	0.660653
200792	chr1	43258650	43258749	Stable	1.39351	0.0129948	2.35822	0.00228309	-0.72285	0.341929
200793	chr1	43259850	43260449	Stable	2.79872	0.00011297	2.39303	0.00122771	0.0501271	0.959272
200794	chr1	43260650	43260749	Stable	1.82163	0.00273157	2.37181	0.0410323	0.053048	0.960156
200795	chr1	43260800	43261049	Stable	2.96341	8.96994e-05	2.24478	0.00237059	0.276207	0.726342
200796	chr1	43263950	43264099	Stable	2.45963	0.000184945	2.26216	0.00428459	-0.0507802	0.965043
200797	chr1	43264150	43264349	Stable	1.84606	0.0031196	2.56106	0.00181894	-0.178205	0.871022
200798	chr1	43264750	43265199	Stable	2.83328	0.000118283	2.86744	0.00123527	-0.0594989	0.952008
200799	chr1	43269500	43269699	Stable	1.90373	0.00373044	1.78466	0.00348719	0.554809	0.438634
200800	chr1	43445350	43445649	Stable	2.57152	0.000381638	2.55377	0.000753427	0.263937	0.784038
200801	chr1	43445750	43446749	Stable	3.95093	1.58694e-05	3.94293	0.00041966	0.373097	0.640817
200802	chr1	43714400	43714749	Stable	3.04024	6.77451e-05	1.76895	0.00884043	0.918378	0.242314
200805	chr1	43817750	43820949	Stable	2.49311	0.000165659	3.8016	0.00041966	-1.17871	0.0785339
200806	chr1	43826250	43826349	Stable	1.05152	0.0397737	2.96761	0.00283295	-0.599578	0.353576
200807	chr1	43827050	43827749	Stable	3.89685	1.75042e-05	3.52776	0.000422791	-0.330287	0.690346
200808	chr1	43828100	43828899	Stable	3.59929	1.79415e-05	3.50557	0.000422152	-0.0356027	0.970561
200811	chr1	43932750	43934949	Stable	4.08046	1.55559e-05	4.19683	0.00041966	-0.271711	0.735723
200812	chr1	43935000	43935199	Stable	2.24572	0.000342945	2.41886	0.00212977	-0.597422	0.334988
200814	chr1	43968750	43968849	Stable	2.42958	0.00036937	1.52794	0.0137204	1.3135	0.0640768
200815	chr1	43969050	43969299	Stable	3.15413	3.45272e-05	1.55391	0.00644915	1.14301	0.0872862
200816	chr1	43969750	43969849	Stable	3.28086	3.38887e-05	2.4409	0.00659046	0.744379	0.343174
200817	chr1	44042050	44042549	Stable	2.54191	0.000378242	3.22973	0.000434954	0.379123	0.587503
200818	chr1	44101600	44101849	Stable	3.01445	0.000302033	1.49725	0.0170943	0.837142	0.241205
200819	chr1	44102600	44103249	Stable	3.03096	3.96387e-05	2.45697	0.00148601	0.0409052	0.967019
200820	chr1	44117700	44120499	Stable	3.54772	2.43292e-05	4.04328	0.00041966	0.027081	0.980994
200821	chr1	44147200	44147749	Stable	2.8526	0.000135265	3.02551	0.000839934	0.163803	0.862227
200822	chr1	44147850	44148799	Stable	3.75479	1.6822e-05	3.68351	0.000429877	0.159468	0.853009
200823	chr1	44465400	44465699	Stable	2.72304	0.000111202	2.47359	0.00138756	0.0325227	0.974534
200824	chr1	44465900	44465999	Stable	1.23084	0.0483991	1.37698	0.0171641	-0.977234	0.150204
200825	chr1	44550900	44553299	Stable	4.02751	1.56052e-05	3.76222	0.000423164	0.135924	0.889592
200826	chr1	44553350	44553499	Stable	1.52719	0.0116145	2.25289	0.00187746	-0.317533	0.693184
200827	chr1	44553600	44553849	Stable	3.12401	4.6516e-05	1.46315	0.0279597	1.35576	0.0908764
200829	chr1	44575750	44575949	Stable	2.79328	0.000127558	2.92236	0.00225687	0.675936	0.293191
200830	chr1	44580000	44580349	Stable	2.3715	0.000226898	2.19079	0.00530954	0.281314	0.741275
200831	chr1	44580850	44581299	Stable	2.87466	0.000119766	2.0855	0.0135663	0.535977	0.434715
200832	chr1	44584050	44585899	Stable	3.11851	3.99276e-05	2.85547	0.000610552	0.176549	0.829239
200833	chr1	44678850	44679399	Stable	3.03161	5.24722e-05	3.77191	0.000420954	-1.13842	0.0878169
200834	chr1	44679750	44679949	Stable	2.24034	0.00042666	2.72985	0.00114674	-0.548649	0.433925
200836	chr1	44745250	44745499	Stable	1.7092	0.00599529	3.43295	0.00107223	-1.02904	0.131461
200837	chr1	44745900	44747999	Stable	3.89029	1.55559e-05	5.04187	0.00041966	-0.52849	0.432519
200838	chr1	44748050	44748649	Stable	2.39002	0.000341752	2.32031	0.00152053	-0.32752	0.661595
200839	chr1	44748950	44750199	Stable	2.82815	7.4184e-05	3.43852	0.00041966	-0.156292	0.847376
200840	chr1	44750450	44753099	Stable	4.11298	1.55559e-05	4.40846	0.00041966	-0.243931	0.751988
200841	chr1	44753400	44753749	Stable	1.82532	0.00236632	2.82044	0.000974832	-0.218124	0.789382
200842	chr1	44765500	44765749	Stable	3.13795	3.95064e-05	2.01303	0.00250582	0.173978	0.84046
200843	chr1	44778850	44779199	Stable	2.64336	0.000112486	1.70276	0.0111388	-0.0137316	0.989656
200844	chr1	44804500	44804649	Stable	2.18633	0.000421485	2.19878	0.0153501	1.2856	0.109069
200847	chr1	44810250	44810549	Stable	2.205	0.000391073	2.73728	0.000642956	0.0453942	0.961671
200848	chr1	44810600	44811249	Stable	3.59251	2.85117e-05	3.25395	0.00102657	-0.0424364	0.963987
200849	chr1	44811850	44812049	Stable	2.7575	8.17523e-05	2.8673	0.00112659	-0.0195159	0.986938
200850	chr1	44812750	44812899	Stable	2.10804	0.00108289	1.77997	0.028902	0.404037	0.568272
200851	chr1	44826400	44827799	Stable	3.32376	2.76411e-05	2.7305	0.0010001	0.64393	0.304863
200852	chr1	44828500	44828899	Stable	2.68915	0.000122056	1.72746	0.0196406	1.30189	0.099646
200853	chr1	44843200	44843299	Stable	1.60863	0.0158783	1.81487	0.00674691	-0.0575885	0.963274
200854	chr1	44849800	44850149	Stable	3.95485	1.55559e-05	2.22079	0.00270587	0.247565	0.759481
200855	chr1	44850650	44850749	Stable	2.1191	0.000662273	2.4754	0.00102177	0.0907413	0.918657
200856	chr1	44850850	44851399	Stable	3.02753	4.02878e-05	4.51462	0.00041966	-0.270593	0.724489
200859	chr1	44861700	44864349	Stable	3.32895	2.2903e-05	4.44899	0.000477999	-0.782193	0.217607
200860	chr1	44864950	44865849	Stable	3.14058	4.90417e-05	3.44618	0.000650453	-0.409397	0.607772
200862	chr1	44867300	44867549	Stable	1.78154	0.00238706	2.30291	0.00256899	-0.39028	0.5803
200863	chr1	44871150	44871299	Stable	1.72632	0.0042309	2.04667	0.00236311	0.718621	0.255055
200864	chr1	44871500	44871899	Stable	2.29566	0.000357142	2.80718	0.00121927	-0.0413557	0.969043
200865	chr1	44872200	44872399	Stable	2.36484	0.00073879	2.85518	0.000595834	-0.249515	0.742787
200868	chr1	44878650	44879649	Stable	3.61089	1.64891e-05	2.38781	0.00130001	1.25391	0.0592869
200870	chr1	44891900	44892049	Stable	2.51883	0.000164491	2.56912	0.00244051	-0.0451521	0.963227
200871	chr1	44892300	44892399	Stable	1.84386	0.00345476	2.76608	0.0061405	0.22479	0.852634
200872	chr1	44977650	44977899	Stable	2.68971	0.000100195	1.53075	0.0287276	0.115987	0.907408
200874	chr1	44983550	44983649	Stable	2.50664	0.00101722	2.12876	0.00261317	0.103671	0.908607
200875	chr1	44985800	44986499	Stable	2.80464	7.32438e-05	2.86346	0.000971891	0.200743	0.804379
200876	chr1	44986700	44987899	Stable	3.17052	3.27388e-05	3.27678	0.000431908	0.0923343	0.918286
200877	chr1	44988000	44988349	Stable	3.17698	4.15614e-05	2.24868	0.00137389	0.608947	0.337151
200878	chr1	44991250	44991399	Stable	2.13906	0.00116578	1.86994	0.0140326	0.929695	0.151301
200879	chr1	45004700	45004799	Stable	1.65005	0.00778391	3.08056	0.000928772	-0.756342	0.298472
200880	chr1	45005050	45005199	Stable	2.1607	0.000620592	3.39199	0.00161252	-0.587097	0.400587
200881	chr1	45005250	45005349	Stable	2.19737	0.000439934	1.23085	0.046166	0.27723	0.75209
200882	chr1	45005450	45006349	Stable	3.06933	3.71151e-05	3.63283	0.000479137	-0.129548	0.892929
200883	chr1	45006550	45007549	Stable	2.82342	7.05193e-05	3.86771	0.00073006	-0.7644	0.263695
200884	chr1	45007900	45008199	Stable	2.15847	0.0010154	3.60521	0.0018627	-0.899124	0.257219
200885	chr1	45014450	45014599	Stable	1.77114	0.0096855	2.09575	0.00441301	-1.1557	0.139409
200886	chr1	45015550	45016949	Stable	3.02993	0.000124557	2.604	0.000909377	-0.135025	0.875297
200887	chr1	45017650	45024599	Stable	4.49051	1.55559e-05	4.83275	0.00041966	-0.397381	0.556788
200888	chr1	45024650	45026199	Stable	3.3073	3.05722e-05	3.55461	0.000431161	-0.572321	0.394851
200889	chr1	45026550	45027249	Stable	2.59029	0.000159223	3.39439	0.000445604	-0.348098	0.650086
200890	chr1	45027500	45028249	Stable	2.54532	0.000132663	3.80208	0.00047284	-0.927321	0.161749
200891	chr1	45028500	45028849	Stable	3.38028	0.000294582	3.82167	0.000775887	-0.874362	0.214072
200892	chr1	45028900	45031799	Stable	4.54236	1.55559e-05	4.89135	0.00041966	-0.558074	0.394391
200893	chr1	45031950	45036099	Stable	3.82063	1.55559e-05	4.49332	0.00041966	-0.635825	0.316932
200894	chr1	45036450	45036599	Stable	2.49543	0.000153782	2.77706	0.00312068	0.660194	0.321256
200895	chr1	45037100	45037399	Stable	2.65616	0.000134624	3.33863	0.000528028	-0.896398	0.151159
200896	chr1	45039800	45039949	Stable	1.4929	0.0104478	2.761	0.000604294	-0.829751	0.212246
200897	chr1	45040400	45045699	Stable	3.6698	1.60901e-05	4.38892	0.00041966	-0.787469	0.206734
200898	chr1	45085300	45085399	Stable	2.22114	0.000770112	2.04722	0.00479149	0.11224	0.903267
200899	chr1	45089800	45089949	Stable	2.04767	0.00399511	2.70874	0.0011133	-0.33625	0.70049
200900	chr1	45090400	45091149	Stable	2.60965	0.000127863	2.9191	0.000525775	-0.750175	0.244959
200901	chr1	45091550	45091799	Stable	2.23876	0.00160973	2.97285	0.000680268	-0.55621	0.408962
200903	chr1	45112000	45112249	Stable	3.42947	4.85062e-05	2.33655	0.00571474	-0.0835191	0.927085
200905	chr1	45113150	45113999	Stable	2.33112	0.000251016	3.22655	0.000635263	-0.341562	0.626218
200906	chr1	45114450	45114549	Stable	1.1834	0.0288554	1.87063	0.0068629	-0.541185	0.493611
200907	chr1	45114750	45120249	Stable	3.32216	2.29125e-05	4.50635	0.00041966	-0.864238	0.186738
200908	chr1	45121350	45121699	Stable	1.63617	0.00338374	3.11098	0.00111574	-1.02496	0.163173
200909	chr1	45121850	45121999	Stable	2.98855	5.83039e-05	1.1579	0.0215723	0.703471	0.252012
200910	chr1	45122050	45122349	Stable	1.91034	0.00129221	3.62688	0.000766631	-1.27661	0.059427
200911	chr1	45132050	45132449	Stable	1.84417	0.00670585	2.9849	0.000606898	-1.20122	0.0832789
200912	chr1	45132600	45132999	Stable	2.62374	0.00123974	2.88613	0.00074278	-0.444263	0.512324
200913	chr1	45133400	45133749	Stable	1.85513	0.0035725	2.45868	0.00151533	-0.687104	0.281521
200914	chr1	45133800	45134049	Stable	1.3671	0.0119902	3.17655	0.00197088	-1.2483	0.102893
200915	chr1	45134450	45135049	Stable	1.70407	0.0028812	3.11467	0.000455968	-1.33819	0.052049
200916	chr1	45135350	45136649	Stable	3.05701	4.39607e-05	3.50043	0.000447459	-0.721103	0.250902
200917	chr1	45137200	45137399	Stable	1.68903	0.00794902	3.95847	0.000892499	-1.14757	0.163521
200918	chr1	45143200	45143349	Stable	1.47781	0.025647	3.21161	0.00055067	-0.879528	0.184486
200919	chr1	45143550	45144299	Stable	1.60192	0.00389401	3.33707	0.000478089	-0.756931	0.219386
200921	chr1	45146200	45148249	Stable	2.67481	9.61326e-05	3.43722	0.000427118	-0.89473	0.151005
200922	chr1	45176850	45181149	Stable	3.47562	1.95653e-05	4.00981	0.00041966	-0.639398	0.31649
200924	chr1	45181850	45181999	Stable	1.50568	0.0479912	2.19915	0.00410599	-1.29551	0.116224
200925	chr1	45182100	45185399	Stable	3.51125	1.97168e-05	3.67592	0.00041966	-0.119899	0.892666
200926	chr1	45185850	45185999	Stable	2.77547	0.000236828	3.13174	0.00113668	-0.451843	0.610788
200927	chr1	45186600	45186899	Stable	3.10575	3.4123e-05	2.63116	0.00150222	0.0306907	0.97457
200928	chr1	45208500	45208799	Stable	1.66042	0.0146908	3.65908	0.00507104	-1.3693	0.0692634
200929	chr1	45241600	45242299	Stable	2.91416	5.55519e-05	3.05315	0.00215878	-0.455304	0.524847
200930	chr1	45242600	45243249	Stable	3.18661	3.03187e-05	4.48925	0.000499243	-0.360816	0.618007
200931	chr1	45269000	45269549	Stable	3.15673	3.74963e-05	3.52542	0.000434106	-1.16551	0.0927992
200932	chr1	45269600	45270299	Stable	2.68857	0.000150484	3.03591	0.000901589	-0.344201	0.668101
200933	chr1	45275400	45275549	Stable	1.80238	0.00594858	2.14121	0.00460369	-0.379539	0.608564
200934	chr1	45285900	45286249	Stable	2.06469	0.00066555	2.80906	0.000686602	-0.500066	0.437017
200936	chr1	45287300	45287849	Stable	2.65762	0.00190701	4.257	0.000428265	-1.03606	0.116717
200937	chr1	45288150	45289399	Stable	3.47085	1.9964e-05	3.5994	0.000436053	-0.304458	0.681129
200938	chr1	45289600	45290149	Stable	3.47396	2.09108e-05	3.80497	0.000472546	-0.356005	0.659809
200939	chr1	45290250	45291199	Stable	3.54139	2.07308e-05	3.69865	0.00041966	-0.380729	0.617116
200940	chr1	45291750	45291999	Stable	2.05816	0.00222913	3.20719	0.00046107	-0.158558	0.879143
200941	chr1	45298250	45298799	Stable	3.32552	3.41512e-05	2.20888	0.00600039	0.617056	0.333703
200942	chr1	45299000	45300899	Stable	3.90914	1.55559e-05	4.15015	0.00041966	0.358972	0.618513
200943	chr1	45301450	45301999	Stable	3.16198	3.28895e-05	2.46624	0.00122113	0.718251	0.24507
200945	chr1	45303150	45303299	Stable	2.35086	0.000350159	1.637	0.0215547	0.511196	0.477261
200946	chr1	45303550	45305649	Stable	3.11567	3.38104e-05	4.24049	0.000421281	-0.22579	0.770994
200947	chr1	45308150	45308449	Stable	2.54637	0.000133267	3.20234	0.000592728	-0.212408	0.780487
200948	chr1	45308500	45313049	Stable	4.55663	1.55559e-05	4.91187	0.00041966	-0.510912	0.442705
200949	chr1	45313100	45316649	Stable	4.20444	1.55559e-05	4.35274	0.00041966	-0.369865	0.597256
200950	chr1	45316850	45316949	Stable	2.3808	0.00140751	2.33828	0.00189281	-0.493209	0.492217
200951	chr1	45318200	45318299	Stable	2.38682	0.000918999	3.04979	0.00147211	0.0941505	0.943048
200952	chr1	45318350	45318449	Stable	2.34973	0.000421203	2.09398	0.00291407	0.182002	0.841988
200953	chr1	45319600	45319799	Stable	2.75958	0.000375326	3.07116	0.00462445	-0.459169	0.500241
200954	chr1	45319900	45320099	Stable	2.05869	0.00174859	3.13964	0.000644434	0.281008	0.738006
200955	chr1	45320800	45321049	Stable	2.29176	0.000359291	2.90017	0.00163712	-0.26547	0.787966
200957	chr1	45330300	45330399	Stable	1.59292	0.00741561	1.90226	0.00282916	-0.355335	0.6665
200958	chr1	45338600	45338699	Stable	1.27639	0.0157305	2.40613	0.00546666	-1.49485	0.051551
200959	chr1	45353250	45353499	Stable	1.06369	0.0423326	3.42501	0.000930485	-1.24313	0.0780224
200960	chr1	45353750	45353849	Stable	2.67827	0.000459249	1.81998	0.00309736	-0.0641325	0.950204
200961	chr1	45354000	45354099	Stable	1.16508	0.0262423	2.65927	0.00200937	-1.2978	0.059775
200962	chr1	45354550	45354649	Stable	3.62501	1.66694e-05	1.45526	0.0258244	0.935571	0.187273
200963	chr1	45354850	45356149	Stable	3.10972	3.65819e-05	3.80937	0.0004212	-0.933787	0.137292
200964	chr1	45356200	45358299	Stable	3.50162	2.02883e-05	4.45636	0.00041966	-0.507503	0.453788
200965	chr1	45358400	45358799	Stable	1.77665	0.00327714	3.17793	0.000536222	-0.442889	0.574099
200966	chr1	45358950	45359299	Stable	2.14371	0.000611105	2.94589	0.00240062	-0.22541	0.766507
200968	chr1	45471700	45471949	Stable	3.47957	2.69093e-05	2.81702	0.00215878	0.718692	0.324082
200969	chr1	45472100	45472249	Stable	1.97053	0.00113579	2.247	0.00424832	-0.0661487	0.942
200970	chr1	45472350	45472799	Stable	3.46498	1.90085e-05	2.32758	0.00367297	0.610419	0.355884
200971	chr1	45473000	45473399	Stable	3.02685	4.96067e-05	3.104	0.000472196	0.510372	0.425313
200972	chr1	45473500	45473849	Stable	1.77117	0.00255704	2.98888	0.00121834	-0.702901	0.334318
200973	chr1	45479400	45479599	Stable	1.52469	0.0078725	2.42577	0.0042734	-0.510444	0.488969
200974	chr1	45479900	45480199	Stable	3.12902	0.000114723	3.52972	0.00100323	-0.447644	0.673371
200976	chr1	45500500	45500649	Stable	2.24572	0.000342945	2.98988	0.0201756	-0.467818	0.671698
200977	chr1	45500700	45504349	Stable	4.42489	1.55559e-05	4.66598	0.00041966	-0.213344	0.790207
200978	chr1	45504400	45504599	Stable	2.25545	0.000335353	2.67441	0.00315341	-0.46006	0.505035
200982	chr1	45538550	45538849	Stable	3.54917	1.88823e-05	1.90258	0.00277664	0.324844	0.648568
200984	chr1	45539850	45542849	Stable	3.9729	1.55559e-05	3.99787	0.00041966	0.000458147	0.999615
200985	chr1	45579950	45580499	Stable	2.50062	0.000429936	3.20542	0.00049416	-0.211557	0.804078
200986	chr1	45581150	45581299	Stable	2.0909	0.00345578	3.05647	0.00154552	-0.263266	0.790207
200987	chr1	45581400	45581599	Stable	2.93056	6.22173e-05	2.25297	0.0014318	0.631592	0.335609
200988	chr1	45596300	45596549	Stable	1.89797	0.00313281	2.72048	0.00081755	-0.775363	0.24596
200989	chr1	45597000	45597799	Stable	3.5249	1.9039e-05	2.94721	0.00106786	-0.123747	0.901038
200990	chr1	45597900	45598099	Stable	2.75051	0.000102184	2.89035	0.00475401	-0.367952	0.639039
200991	chr1	45598250	45598399	Stable	2.57979	0.000154455	2.16478	0.00216221	1.03381	0.136703
200992	chr1	45598550	45599399	Stable	2.26153	0.000335617	3.89811	0.00041966	-0.370762	0.599555
200993	chr1	45599700	45600049	Stable	2.66197	0.000155481	3.29701	0.000757792	0.00749193	0.994892
200994	chr1	45600350	45600449	Stable	1.24456	0.0259446	2.38069	0.00563187	-0.724274	0.364409
200995	chr1	45600900	45601049	Stable	2.01873	0.00124469	2.94682	0.00320474	-0.465373	0.582611
200996	chr1	45625350	45628299	Stable	3.47525	1.91031e-05	4.06209	0.00041966	-0.542602	0.395289
200997	chr1	45646950	45647099	Stable	2.89989	0.000365421	1.31194	0.0290001	0.389567	0.67846
200998	chr1	45671650	45672849	Stable	3.13219	3.88914e-05	3.31061	0.000430937	-0.350787	0.633185
200999	chr1	45673050	45674699	Stable	3.43652	1.957e-05	3.99483	0.00041966	-0.356106	0.611679
201000	chr1	45674950	45675899	Stable	2.91401	5.4562e-05	2.93063	0.000727835	-0.258582	0.741454
201001	chr1	45676800	45676949	Stable	1.64067	0.0172904	3.72034	0.000453876	-0.91925	0.367913
201002	chr1	45680000	45680099	Stable	1.21286	0.0214968	2.78936	0.00465699	-0.624235	0.333983
201005	chr1	45723600	45724049	Stable	2.881	7.19474e-05	2.18745	0.00152476	0.748535	0.254236
201006	chr1	45744550	45745199	Stable	3.0971	4.27088e-05	2.24016	0.0016945	0.705222	0.278417
201007	chr1	45745850	45745999	Stable	2.83866	0.000130084	1.69055	0.0100866	0.674828	0.322149
201008	chr1	45754200	45754299	Stable	2.4968	0.000575326	1.2172	0.026606	0.34297	0.620322
201010	chr1	45755050	45756899	Stable	4.1329	1.55559e-05	2.75204	0.000666859	0.818088	0.226145
201011	chr1	45757150	45758399	Stable	3.15661	3.13311e-05	2.73111	0.000687179	0.844071	0.179185
201012	chr1	45758550	45758699	Stable	1.9356	0.00157222	2.65391	0.00199416	-0.137804	0.874562
201013	chr1	45759050	45759299	Stable	2.52762	0.000168591	2.36774	0.00285004	0.69804	0.297069
201014	chr1	45759550	45762799	Stable	3.79591	1.56052e-05	3.85194	0.00041966	-0.202465	0.7995
201015	chr1	45763000	45763599	Stable	2.94077	7.72393e-05	3.26038	0.000439314	-0.306231	0.664519
201016	chr1	45763650	45768649	Stable	3.77635	1.56059e-05	3.97291	0.00041966	-0.352033	0.613187
201018	chr1	45794800	45796249	Stable	3.61403	2.03907e-05	3.42955	0.000436842	-0.107819	0.914987
201022	chr1	45838450	45838549	Stable	2.32376	0.000598745	1.43557	0.0476036	0.841245	0.33469
201023	chr1	45838700	45839149	Stable	3.12396	3.85794e-05	1.78714	0.0143547	1.04776	0.11544
201024	chr1	45843050	45843399	Stable	3.32993	2.72365e-05	2.31184	0.00563642	0.548973	0.423273
201026	chr1	45859900	45860699	Stable	2.97188	5.4562e-05	3.77268	0.00041966	-0.182332	0.821966
201027	chr1	45860900	45861399	Stable	3.18325	5.69199e-05	1.95263	0.00604234	0.499273	0.508727
201028	chr1	45863950	45865599	Stable	3.17426	3.39929e-05	2.97389	0.000639305	0.567799	0.386968
201029	chr1	45865800	45866099	Stable	2.97658	0.000673532	2.60356	0.00176766	0.616278	0.36606
201030	chr1	45867450	45867699	Stable	2.64572	0.000732496	2.46138	0.0038212	-0.390718	0.611556
201031	chr1	45873000	45873099	Stable	2.75334	0.000139393	3.353	0.00149697	-0.599654	0.5458
201032	chr1	45873500	45873849	Stable	1.86925	0.00184651	2.84847	0.000906597	-0.368657	0.638165
201033	chr1	45925200	45926199	Stable	3.05483	3.84429e-05	2.08881	0.00190686	0.611991	0.341312
201035	chr1	46696450	46696649	Stable	3.18391	5.79413e-05	2.28857	0.00239623	0.74525	0.332357
201037	chr1	46852400	46855399	Stable	4.42223	1.55559e-05	4.30029	0.00041966	-0.121262	0.898923
201039	chr1	47563550	47563849	Stable	2.68541	0.00136359	3.42048	0.000695101	0.262685	0.735371
201040	chr1	50025350	50025899	Stable	2.5648	0.000209885	2.2613	0.0016456	-0.227088	0.788051
201041	chr1	50962500	50963199	Stable	3.46027	2.3646e-05	3.70047	0.000426195	-0.262422	0.736088
201043	chr1	50980550	50980849	Stable	3.68132	1.59016e-05	1.41804	0.0212428	1.23385	0.0934001
201044	chr1	51064800	51064949	Stable	1.90528	0.00155853	1.32316	0.0256555	-0.0131892	0.990401
201045	chr1	51118900	51120299	Stable	2.61459	0.000112382	3.61694	0.000426516	-0.680413	0.270865
201047	chr1	51121950	51122049	Stable	2.70702	0.00269315	2.61801	0.00357686	-0.122447	0.94514
201048	chr1	51124750	51125049	Stable	2.55873	0.000612378	2.7898	0.000814657	-1.02738	0.12261
201049	chr1	51125250	51127749	Stable	3.64974	1.75796e-05	3.82265	0.00041966	-0.52001	0.417182
201050	chr1	51216600	51217299	Stable	2.26463	0.000526642	3.11831	0.00053303	-1.08388	0.0970572
201052	chr1	51236300	51236599	Stable	1.92721	0.00179506	3.94881	0.000453604	-0.0511154	0.961291
201054	chr1	51239950	51240399	Stable	2.46831	0.000175339	2.62296	0.0016476	0.290199	0.681695
201056	chr1	51242850	51243499	Stable	2.44717	0.000266908	3.36896	0.00043973	-0.616433	0.374536
201057	chr1	51243550	51244049	Stable	2.95481	4.87433e-05	2.82662	0.000573926	-0.259816	0.728028
201058	chr1	51250050	51250299	Stable	1.94835	0.00126259	4.13059	0.00146346	-0.387249	0.600615
201059	chr1	51250750	51251049	Stable	2.05858	0.000793591	2.99559	0.00118254	-0.582614	0.385155
201060	chr1	51264050	51265199	Stable	3.0713	4.26363e-05	3.43341	0.0004212	-0.621555	0.322951
201061	chr1	51265500	51266099	Stable	2.12373	0.00051583	3.37892	0.0019456	-0.520141	0.409834
201062	chr1	51288150	51292849	Stable	3.86657	1.55559e-05	4.10982	0.00041966	-0.11311	0.898711
201063	chr1	51292900	51293399	Stable	1.96241	0.000980397	3.26484	0.00211705	-0.138874	0.869975
201065	chr1	51332950	51334099	Stable	3.06095	4.45216e-05	3.31118	0.000447441	-0.298053	0.695744
201066	chr1	51334200	51335099	Stable	3.23015	4.10771e-05	2.9341	0.000630648	0.31231	0.67205
201067	chr1	51477600	51478349	Stable	3.6886	2.26818e-05	3.17406	0.000475618	-0.0909768	0.92813
201068	chr1	51478600	51479349	Stable	3.8919	1.57077e-05	3.4356	0.000629041	-0.208314	0.807079
201069	chr1	51505250	51505599	Stable	1.95807	0.00107392	2.91135	0.000769146	0.129219	0.878504
201070	chr1	51507500	51507799	Stable	1.95355	0.00125344	3.29541	0.000696548	-0.313725	0.673309
201071	chr1	51509250	51509349	Stable	1.3318	0.0166921	2.10497	0.027241	0.91729	0.369659
201072	chr1	51593900	51594099	Stable	1.47318	0.0106612	2.87805	0.00204102	-1.17013	0.0962033
201073	chr1	51594300	51594449	Stable	1.8207	0.00528672	1.71216	0.00439862	0.158336	0.855618
201074	chr1	51596350	51596999	Stable	3.4229	1.99428e-05	2.31628	0.00132598	0.407871	0.538071
201075	chr1	51689150	51689699	Stable	3.1367	6.09875e-05	1.56806	0.00951093	1.2456	0.111816
201076	chr1	51690100	51690699	Stable	2.84158	8.81428e-05	1.98558	0.0024077	1.12765	0.0982429
201077	chr1	51746650	51748799	Stable	3.04196	7.90085e-05	3.69901	0.00041966	-0.243748	0.770847
201079	chr1	51788150	51788399	Stable	2.81682	0.000265587	2.29744	0.0112022	0.334313	0.678491
201080	chr1	51788550	51789649	Stable	3.23993	3.09345e-05	4.14696	0.00041966	-0.827759	0.185077
201081	chr1	51789850	51790799	Stable	2.65566	0.000130277	4.29889	0.000438973	-0.536263	0.414316
201082	chr1	51838000	51838299	Stable	2.40203	0.000943586	2.42713	0.00110829	0.741561	0.319554
201083	chr1	51914750	51915999	Stable	3.69313	1.88431e-05	3.91824	0.00041966	0.146928	0.879487
201084	chr1	52111900	52113749	Stable	3.47573	1.93549e-05	3.68654	0.00041966	-0.294983	0.678013
201085	chr1	52114250	52114449	Stable	2.80174	0.000136002	2.3872	0.00101609	0.305191	0.664411
201086	chr1	52118600	52120199	Stable	3.69307	2.30829e-05	3.44022	0.000459784	0.0323257	0.97665
201087	chr1	52230050	52230149	Stable	1.68314	0.00418841	2.4521	0.00354763	-0.86454	0.208357
201088	chr1	52231450	52233249	Stable	4.25445	1.55559e-05	4.15222	0.00041966	0.22112	0.820192
201089	chr1	52233400	52234249	Stable	3.64551	1.73666e-05	3.26156	0.000530253	0.2134	0.797444
201090	chr1	52253800	52256049	Stable	2.78264	7.75052e-05	3.50117	0.00041966	-0.50815	0.441075
201091	chr1	52263250	52263449	Stable	2.07623	0.00137667	2.77905	0.000727918	-0.446147	0.52201
201092	chr1	52263600	52264199	Stable	2.83775	8.75093e-05	3.35458	0.000519481	-0.155545	0.867506
201093	chr1	52264750	52265449	Stable	2.57231	0.000732304	2.44761	0.000910756	-0.290008	0.708053
201094	chr1	52265500	52265849	Stable	2.22378	0.000666038	3.20363	0.000878589	-0.862747	0.165949
201095	chr1	52265950	52266099	Stable	1.75219	0.00562729	2.27356	0.00189281	-0.775659	0.29375
201096	chr1	52266400	52267049	Stable	2.47344	0.000203454	3.4994	0.000424971	-0.807616	0.208467
201097	chr1	52299000	52299149	Stable	2.08381	0.00312602	1.73252	0.00904381	-0.642172	0.458896
201099	chr1	52499300	52500399	Stable	3.74684	1.86668e-05	3.6349	0.000558486	0.221565	0.804574
201100	chr1	52500600	52501049	Stable	3.74842	3.64288e-05	3.42027	0.000452357	0.929453	0.2033
201101	chr1	52597050	52597499	Stable	2.81552	6.80969e-05	2.25369	0.00316092	0.656361	0.286253
201102	chr1	52598000	52598749	Stable	2.49761	0.000197936	3.36458	0.000447026	0.0554715	0.956299
201103	chr1	52630600	52631299	Stable	3.90963	1.55559e-05	4.0925	0.00041966	-0.0671629	0.943903
201104	chr1	52752550	52752699	Stable	2.00743	0.00224217	1.83569	0.013746	0.120115	0.910542
201105	chr1	52764000	52764249	Stable	1.61069	0.00739155	2.82684	0.00140435	-0.772743	0.308977
201106	chr1	52764350	52764799	Stable	2.6991	8.49827e-05	3.10786	0.000733036	-0.479856	0.512913
201107	chr1	52799100	52799449	Stable	1.76297	0.00363105	2.65487	0.00214971	-0.719336	0.34254
201108	chr1	52799800	52800199	Stable	2.2832	0.000308614	2.26636	0.00176358	-0.728711	0.240668
201109	chr1	52800400	52800549	Stable	2.26744	0.000863094	3.54272	0.00174079	-0.540186	0.408236
201111	chr1	52816700	52818199	Stable	3.82522	1.7582e-05	3.88659	0.00041966	0.013255	0.990847
201112	chr1	52844200	52844749	Stable	2.74927	7.96589e-05	3.97056	0.00041966	-0.322442	0.646489
201113	chr1	52845100	52845749	Stable	3.84017	1.61853e-05	3.42348	0.000783559	-0.0878133	0.928833
201114	chr1	53296400	53296999	Stable	3.4642	2.49072e-05	2.96008	0.00060114	0.578129	0.368803
201115	chr1	53297200	53297699	Stable	2.86302	0.000125877	3.19942	0.000981712	-0.303694	0.712539
201116	chr1	53313100	53314349	Stable	3.57937	1.79857e-05	3.73718	0.000422747	0.0427854	0.964931
201117	chr1	53351900	53352699	Stable	3.26607	3.47912e-05	3.91672	0.00041966	0.0227703	0.984735
201119	chr1	53757450	53757999	Stable	1.87873	0.00227422	3.45274	0.00043973	-1.13477	0.0824691
201120	chr1	53758250	53758349	Stable	1.30188	0.0232264	2.01737	0.01157	0.278528	0.761602
201122	chr1	53773300	53773399	Stable	2.37318	0.000247178	2.12663	0.00279759	-0.830059	0.192913
201123	chr1	53773600	53774999	Stable	3.12964	4.05419e-05	3.75663	0.000438776	-0.476087	0.495218
201124	chr1	53784200	53785249	Stable	2.94344	0.000104886	3.67331	0.000423014	-0.420188	0.582641
201125	chr1	53785400	53785799	Stable	4.31769	3.6221e-05	3.30748	0.000594232	-0.143329	0.880749
201126	chr1	53823600	53824099	Stable	3.38933	0.00010278	2.65823	0.000774282	-0.343418	0.624992
201127	chr1	53824250	53824549	Stable	2.94003	6.91167e-05	3.17045	0.000475319	0.40267	0.553214
201128	chr1	53838000	53839449	Stable	2.36591	0.000246219	3.25724	0.000500711	-0.438404	0.509243
201131	chr1	54129200	54129399	Stable	3.77953	1.85298e-05	1.7137	0.00479385	0.16035	0.870722
201132	chr1	54250100	54250499	Stable	2.88764	8.5028e-05	2.51677	0.000877054	0.0277746	0.97826
201133	chr1	54250900	54251049	Stable	1.65841	0.00690382	2.39812	0.0129637	-0.271054	0.816388
201134	chr1	54438150	54439649	Stable	3.85607	1.57077e-05	3.81172	0.000423978	-0.0351868	0.973506
201138	chr1	54557150	54557599	Stable	3.39495	5.14244e-05	2.70339	0.00100951	0.169451	0.864873
201139	chr1	54557950	54558349	Stable	2.52049	0.000240484	2.40794	0.000980893	0.194537	0.824426
201140	chr1	54712700	54713049	Stable	2.27665	0.000656224	2.8191	0.000744395	-0.720397	0.247087
201141	chr1	54713500	54713949	Stable	3.24651	2.87219e-05	3.17687	0.000488768	-0.881278	0.182737
201149	chr1	54906500	54907999	Stable	2.7298	7.77894e-05	3.53624	0.00041966	-0.678391	0.269375
201153	chr1	54913250	54914049	Stable	1.94031	0.00102477	3.2271	0.000480951	-1.23407	0.0649551
201154	chr1	54914200	54915099	Stable	2.23207	0.000553236	3.5413	0.00041966	-1.08333	0.118591
201157	chr1	54924800	54926899	Stable	3.25832	2.86506e-05	3.94257	0.00041966	-0.7734	0.24402
201158	chr1	54930650	54930899	Stable	1.56092	0.00895149	2.76379	0.000919401	-1.17459	0.112355
201162	chr1	54952300	54952549	Stable	1.66455	0.00329205	2.87558	0.000705445	-1.02422	0.11052
201175	chr1	55026050	55027499	Stable	3.95007	1.56356e-05	4.47858	0.00041966	-0.190738	0.831856
201176	chr1	55027600	55028099	Stable	3.26847	3.97472e-05	3.81961	0.00421171	0.0770451	0.941391
201177	chr1	55051950	55053999	Stable	4.01595	1.59809e-05	4.07374	0.00041966	0.126388	0.900562
201178	chr1	55086500	55088049	Stable	4.16373	1.55559e-05	4.0188	0.000444506	0.121656	0.900744
201179	chr1	55088150	55089299	Stable	3.37791	2.7058e-05	3.68506	0.000421443	-0.379246	0.602853
201180	chr1	55130200	55130349	Stable	2.575	0.000538739	1.03762	0.0440974	0.500812	0.502585
201181	chr1	55130400	55132449	Stable	3.97443	1.61571e-05	4.71195	0.00041966	-0.175589	0.854387
201183	chr1	55160800	55161299	Stable	2.95765	0.000145066	2.75771	0.000923536	-0.487383	0.535782
201184	chr1	55161600	55162499	Stable	2.25674	0.000361754	3.00173	0.000773055	-0.802084	0.23408
201186	chr1	55201100	55203399	Stable	3.07806	4.23032e-05	3.74555	0.00041966	-0.461053	0.493061
201187	chr1	55224750	55228849	Stable	3.65632	1.88954e-05	4.22543	0.00041966	-0.442907	0.519818
201188	chr1	55229000	55229099	Stable	1.73496	0.00841302	1.71413	0.00704573	-1.05578	0.224172
201189	chr1	55237300	55237849	Stable	2.44078	0.000272547	3.87719	0.00041966	-0.41385	0.54023
201190	chr1	55237950	55238149	Stable	2.47198	0.000175203	2.68521	0.0053183	-0.305534	0.69426
201191	chr1	55238350	55238499	Stable	1.53397	0.00515645	2.63847	0.000842785	-0.344441	0.614073
201192	chr1	55238850	55239149	Stable	1.53134	0.0107107	2.79168	0.00103687	-0.824686	0.253721
201193	chr1	55865750	55865949	Stable	2.36736	0.00407209	2.15686	0.00427739	-0.0798409	0.953401
201194	chr1	56681150	56681399	Stable	1.08213	0.0419637	2.92074	0.00132065	-1.04357	0.132054
201195	chr1	56681700	56682149	Stable	1.76151	0.00347587	3.46494	0.00041966	-0.397528	0.55672
201196	chr1	56685650	56685899	Stable	1.58649	0.0151402	2.9908	0.00072828	0.0889358	0.921946
201199	chr1	56970550	56976099	Stable	4.17794	1.55559e-05	4.38497	0.00041966	-0.220688	0.798268
201201	chr1	57052300	57052399	Stable	2.08404	0.00106387	2.75438	0.00112759	-0.687319	0.290194
201206	chr1	57075700	57075999	Stable	2.70533	8.33644e-05	2.23852	0.00153808	-0.385235	0.564233
201207	chr1	57078450	57079149	Stable	1.54188	0.0058456	3.23672	0.000433567	-0.575444	0.363501
201209	chr1	57079900	57080199	Stable	2.09602	0.000674838	2.87991	0.000556242	-0.976862	0.120596
201210	chr1	57174450	57174749	Stable	2.06864	0.00108593	2.8669	0.0012488	-1.22421	0.0805122
201211	chr1	57188700	57188899	Stable	2.1988	0.00118664	2.73923	0.000814403	0.728982	0.265564
201215	chr1	57204850	57204949	Stable	1.78038	0.00208832	3.07186	0.00484093	-1.14408	0.0908286
201216	chr1	57205250	57205699	Stable	2.22391	0.000674497	2.88327	0.00139737	-0.730524	0.261285
201217	chr1	57377600	57378249	Stable	3.43717	2.67086e-05	3.37647	0.00126755	0.302151	0.768444
201218	chr1	57405650	57407599	Stable	4.38675	1.55559e-05	4.54143	0.00041966	-0.0114155	0.991757
201219	chr1	57436100	57436849	Stable	2.16492	0.000616855	3.1412	0.00046221	-0.682119	0.277564
201225	chr1	57774500	57775449	Stable	3.56199	1.8679e-05	3.65333	0.000771574	0.0754848	0.942105
201227	chr1	57969200	57970099	Stable	4.30867	1.55559e-05	3.88231	0.00041966	-0.0194635	0.986413
201228	chr1	57970300	57970799	Stable	3.26989	8.58742e-05	3.13844	0.000616839	0.236813	0.762571
201229	chr1	57988550	57990049	Stable	2.90021	5.71369e-05	3.39185	0.000423014	-0.743637	0.23204
201230	chr1	57995000	57995949	Stable	2.72935	0.000140256	3.7993	0.00041966	-0.370892	0.65331
201231	chr1	57996100	57996499	Stable	2.6541	0.000185704	2.87423	0.00178418	-0.120804	0.920017
201232	chr1	57996650	57996749	Stable	2.09604	0.0129945	1.91298	0.0043507	-0.813647	0.439007
201233	chr1	57999350	57999499	Stable	2.741	0.000117494	3.34551	0.0017855	-0.995447	0.131858
201234	chr1	58028900	58031099	Stable	3.03919	4.63825e-05	3.52471	0.00041966	-0.707048	0.276984
201237	chr1	58152750	58152949	Stable	1.7928	0.00302111	2.27356	0.00189281	-0.735051	0.249035
201265	chr1	58353250	58353799	Stable	3.26547	4.72786e-05	1.85282	0.00819755	1.28483	0.10607
201266	chr1	58358250	58360849	Stable	4.1549	1.55559e-05	4.00902	0.000421281	0.314206	0.689507
201269	chr1	58366300	58367799	Stable	3.61521	1.99489e-05	3.49491	0.000524082	0.369881	0.653263
201270	chr1	58391300	58394449	Stable	4.63539	1.55559e-05	4.07625	0.00041966	0.568846	0.456851
201271	chr1	58422950	58424499	Stable	4.4277	1.55559e-05	4.40262	0.00041966	-0.279805	0.736645
201272	chr1	58444500	58446499	Stable	3.68946	1.74477e-05	3.87916	0.00041966	-0.0479739	0.962278
201273	chr1	58446700	58446949	Stable	1.31007	0.0136961	2.75585	0.00123444	-0.472675	0.468975
201274	chr1	58504150	58504949	Stable	2.88362	0.000113312	3.5278	0.000790593	-0.278006	0.786538
201275	chr1	58505250	58505799	Stable	2.66954	0.000111332	3.41707	0.000424885	-0.133351	0.875766
201276	chr1	58585250	58587199	Stable	3.67817	1.73063e-05	3.78956	0.00041966	-0.183676	0.835975
201278	chr1	58614250	58614399	Stable	2.398	0.0007962	2.60831	0.00116065	-0.670394	0.279548
201279	chr1	58614800	58615099	Stable	1.53315	0.00626683	2.23529	0.00172367	-1.06397	0.0970902
201282	chr1	58650950	58654049	Stable	4.32266	1.55559e-05	4.79384	0.00041966	-0.463963	0.539688
201286	chr1	58663600	58664699	Stable	2.47056	0.000303423	3.43772	0.00045946	-1.16231	0.119337
201287	chr1	58674600	58674799	Stable	1.34569	0.0311703	2.97965	0.00130399	-0.962647	0.209716
201288	chr1	58675350	58676249	Stable	3.37554	2.30963e-05	3.2457	0.000509336	-0.448485	0.492235
201290	chr1	58677150	58677699	Stable	1.7095	0.00539103	3.26292	0.000440771	-0.931722	0.185824
201291	chr1	58697450	58697649	Stable	2.15844	0.00049667	2.06013	0.0107078	0.550744	0.532607
201292	chr1	58697950	58699649	Stable	3.08889	3.60062e-05	3.54157	0.00041966	-0.375702	0.579433
201293	chr1	58699800	58699949	Stable	2.21339	0.000840109	3.02226	0.00159251	-1.09708	0.0938327
201294	chr1	58700050	58700249	Stable	3.15472	0.000304883	1.83037	0.00481908	-0.221471	0.76854
201295	chr1	58709950	58712799	Stable	4.53328	1.55559e-05	5.08234	0.00041966	-0.279491	0.741739
201296	chr1	58713150	58715099	Stable	4.16902	1.55559e-05	5.01358	0.00041966	-0.42362	0.579686
201297	chr1	58715300	58715699	Stable	1.43843	0.00905046	2.78238	0.00119383	-0.844265	0.231106
201299	chr1	58725100	58725999	Stable	2.71227	8.3438e-05	3.9916	0.00041966	-1.05624	0.0994917
201300	chr1	58726050	58727899	Stable	2.26116	0.000437702	3.50297	0.00041966	-1.14623	0.0938568
201301	chr1	58728100	58728649	Stable	1.65417	0.00377185	3.10438	0.00059612	-1.07845	0.125998
201305	chr1	58741700	58742599	Stable	2.29591	0.000352071	3.96836	0.00041966	-1.2406	0.0866979
201306	chr1	58742750	58744699	Stable	2.35649	0.000354585	3.61575	0.00041966	-1.39361	0.0597555
201309	chr1	58760550	58760799	Stable	1.80025	0.0077351	2.33529	0.00124735	-0.665064	0.287841
201310	chr1	58760850	58761249	Stable	2.42638	0.000232689	3.01695	0.00049187	-0.929178	0.15558
201311	chr1	58761600	58762299	Stable	1.90269	0.00149955	3.92119	0.0004222	-0.808342	0.214926
201313	chr1	58794800	58796249	Stable	3.95404	1.55559e-05	3.83505	0.00041966	0.0438752	0.966551
201314	chr1	58845650	58845899	Stable	1.06388	0.0461591	3.25656	0.000531281	-1.22627	0.0937813
201315	chr1	58852250	58853199	Stable	1.87678	0.00127909	3.15474	0.000451995	-1.07055	0.0945229
201316	chr1	58853400	58853699	Stable	1.36935	0.0156887	2.755	0.000784179	-1.16272	0.0991803
201319	chr1	58855250	58856899	Stable	2.89179	7.0821e-05	4.42063	0.00041966	-1.21393	0.0711149
201321	chr1	58859600	58859799	Stable	1.62809	0.00927195	2.79772	0.00103727	-1.10772	0.197651
201323	chr1	58909950	58910399	Stable	2.30598	0.000394525	2.64973	0.00073547	-0.948978	0.142576
201325	chr1	58945850	58945999	Stable	1.70679	0.00258531	2.23144	0.001365	-0.749377	0.228219
201327	chr1	58950350	58950499	Stable	2.22297	0.000928221	2.6589	0.00365768	-0.638591	0.451184
201328	chr1	58950700	58952099	Stable	2.29825	0.000330163	3.38626	0.00041976	-0.753983	0.225458
201329	chr1	58952200	58953349	Stable	3.03801	3.81373e-05	2.80594	0.000603389	-0.168039	0.8367
201330	chr1	58953550	58953749	Stable	2.16488	0.000537837	2.50245	0.00145833	-0.322553	0.655459
201331	chr1	58972700	58974299	Stable	3.74122	1.71476e-05	4.01358	0.00041966	0.0552142	0.957602
201332	chr1	59119500	59119749	Stable	3.31163	5.67731e-05	2.84495	0.00282298	0.0302934	0.979724
201333	chr1	59119800	59121049	Stable	4.69386	1.55559e-05	4.47593	0.00041966	0.0483125	0.964787
201336	chr1	59163600	59163799	Stable	1.48285	0.0116046	2.47696	0.00237355	-1.05971	0.110772
201337	chr1	59236600	59237849	Stable	3.18495	4.16445e-05	3.53922	0.000536782	-0.00212799	0.998489
201343	chr1	59409650	59409949	Stable	2.21277	0.000377481	2.82869	0.000553608	-0.0648059	0.942964
201344	chr1	59480500	59481899	Stable	4.02878	1.55559e-05	3.91454	0.00041966	-0.0735226	0.938311
201345	chr1	59482150	59483499	Stable	3.44393	2.07582e-05	3.58309	0.000470265	0.0409884	0.967539
201346	chr1	59485150	59485649	Stable	3.14749	3.1131e-05	3.14104	0.00056742	-0.32923	0.657571
201347	chr1	59487900	59488049	Stable	1.26662	0.0176928	2.39165	0.00168872	-0.521902	0.406817
201349	chr1	59669600	59671599	Stable	4.06724	1.57708e-05	4.17573	0.00042942	-0.154939	0.872302
201350	chr1	59683900	59686099	Stable	3.61924	1.835e-05	4.11602	0.00041966	-0.332901	0.651575
201351	chr1	59762050	59764249	Stable	4.94168	1.55559e-05	4.72832	0.00041966	0.105761	0.920229
201352	chr1	59764300	59765349	Stable	3.4307	2.02555e-05	4.24635	0.00041966	0.110588	0.898446
201353	chr1	59912300	59914199	Stable	4.10988	1.56052e-05	3.23246	0.000903333	0.919952	0.255353
201354	chr1	59915700	59915849	Stable	1.6168	0.00407203	2.07317	0.00661626	-0.0253172	0.98325
201355	chr1	59930200	59930499	Stable	2.8481	0.000101427	2.43497	0.00155465	-0.14697	0.873236
201356	chr1	59930900	59931199	Stable	2.12383	0.000568825	3.56551	0.000424728	-0.858066	0.192315
201357	chr1	59969600	59969749	Stable	2.94773	6.23539e-05	1.81933	0.0320117	1.80692	0.052304
201358	chr1	59999350	59999599	Stable	1.60888	0.0143268	3.37115	0.000433411	-0.734168	0.235401
201359	chr1	59999750	60001549	Stable	2.90128	5.64253e-05	3.31557	0.000446686	-0.437806	0.513821
201360	chr1	60096600	60096949	Stable	2.73445	8.89045e-05	3.53014	0.000472546	0.125439	0.886434
201361	chr1	60097000	60099249	Stable	3.79099	1.71214e-05	4.11119	0.00041966	-0.200526	0.812569
201362	chr1	60157900	60158649	Stable	2.83412	8.43765e-05	3.4438	0.000540896	-0.577759	0.386585
201363	chr1	60158800	60159149	Stable	2.91211	5.47695e-05	2.72042	0.000995125	-0.12421	0.886434
201365	chr1	60179600	60180249	Stable	3.29333	2.55583e-05	3.32534	0.000429557	-0.154062	0.851661
201366	chr1	60180500	60181599	Stable	4.00071	1.57396e-05	3.77924	0.000476335	0.426015	0.604119
201367	chr1	60342550	60344549	Stable	3.81767	1.70248e-05	3.91653	0.00041966	0.056936	0.956092
201368	chr1	60408900	60410599	Stable	4.14263	1.55559e-05	4.05255	0.00041966	0.0363512	0.974194
201369	chr1	60565450	60565649	Stable	2.43576	0.000220975	1.4437	0.0366738	-0.0658721	0.950967
201370	chr1	60565700	60566949	Stable	4.39744	1.55559e-05	3.80055	0.00047876	0.254114	0.766339
201371	chr1	60567000	60567799	Stable	3.18818	4.05188e-05	3.45439	0.000422747	-0.257101	0.751826
201373	chr1	60617300	60617499	Stable	1.78046	0.00295989	2.70004	0.00164679	-0.714921	0.322142
201376	chr1	60824750	60826699	Stable	2.68939	0.000108513	4.24564	0.00041966	-1.26637	0.0590831
201379	chr1	60860050	60860799	Stable	3.33443	2.88325e-05	3.18885	0.00049695	0.309694	0.673646
201381	chr1	62443750	62444449	Stable	3.05948	3.7894e-05	2.50967	0.00101483	-0.516478	0.432563
201382	chr1	62444700	62445199	Stable	3.11981	3.80596e-05	3.68441	0.000536095	-0.589701	0.347417
201383	chr1	62445650	62445799	Stable	1.86143	0.0023861	2.96081	0.000784534	0.0610494	0.957791
201384	chr1	62446650	62446799	Stable	1.36492	0.0123456	2.26695	0.00114697	-0.00264418	0.998068
201386	chr1	62548250	62551699	Stable	2.38215	0.000223406	3.57212	0.00041966	-1.2035	0.0683027
201388	chr1	62664950	62665849	Stable	3.28247	3.51061e-05	2.70183	0.0011236	0.35749	0.634716
201389	chr1	62666100	62666299	Stable	1.37263	0.0259972	2.82701	0.000669885	0.0498098	0.969497
201390	chr1	62666350	62667049	Stable	3.03203	8.04547e-05	2.19578	0.00243258	0.586473	0.392396
201391	chr1	62678250	62678749	Stable	3.1808	3.35211e-05	2.34104	0.00283572	0.419074	0.589893
201392	chr1	62678800	62679549	Stable	3.22993	2.89678e-05	2.89964	0.000859877	0.281861	0.702824
201393	chr1	62702900	62704399	Stable	2.85267	9.03812e-05	3.3342	0.000424728	-0.187671	0.814488
201394	chr1	62704750	62707849	Stable	3.31209	3.06426e-05	3.94748	0.00041966	-0.173763	0.849841
201395	chr1	62712900	62713199	Stable	1.8735	0.00264156	2.64278	0.00264702	-0.426252	0.533087
201396	chr1	62713250	62713599	Stable	2.21181	0.000673068	3.14401	0.000780405	-0.791096	0.218631
201397	chr1	62715850	62716099	Stable	3.23154	2.97029e-05	1.32434	0.0287747	0.96959	0.158568
201398	chr1	62716750	62716949	Stable	2.50625	0.000188345	2.96418	0.0110388	0.1607	0.873306
201399	chr1	62717250	62722849	Stable	3.41062	2.2219e-05	3.80671	0.00041966	-0.237514	0.755607
201400	chr1	62724200	62724399	Stable	1.68278	0.00437956	2.54959	0.00173826	-0.539531	0.454629
201401	chr1	62732700	62732799	Stable	2.41886	0.00156001	2.02103	0.0245273	0.207888	0.872156
201402	chr1	62735300	62735499	Stable	1.50457	0.0406427	2.98965	0.00061122	-1.91739	0.0628243
201403	chr1	62735900	62736199	Stable	1.68519	0.0057087	2.92827	0.00698169	-0.47708	0.466624
201404	chr1	62736600	62737099	Stable	1.90487	0.00150105	2.91145	0.000564732	-1.31429	0.0534174
201407	chr1	62743050	62743249	Stable	1.90544	0.00456343	3.44161	0.00340049	-0.244649	0.772394
201408	chr1	62743500	62743699	Stable	3.06258	7.61397e-05	2.37415	0.00192845	0.790714	0.258039
201409	chr1	62747750	62748249	Stable	2.59726	0.000160076	3.34315	0.000689023	0.0144949	0.988862
201410	chr1	62749200	62752649	Stable	3.2361	2.84792e-05	3.86408	0.00041966	-0.248452	0.744316
201411	chr1	62753000	62753299	Stable	1.78476	0.0025233	2.38874	0.000950962	-0.452352	0.51487
201412	chr1	62762800	62765149	Stable	2.6518	0.000111991	3.43733	0.00041966	-1.0816	0.0911659
201413	chr1	62766650	62767849	Stable	2.15182	0.000464139	3.20424	0.000444258	-0.814252	0.188158
201414	chr1	62767950	62768599	Stable	2.46548	0.000211543	2.84832	0.000763231	-0.359873	0.622762
201415	chr1	62769350	62769549	Stable	1.50727	0.0221204	1.86704	0.00346007	-0.471049	0.644598
201416	chr1	62770350	62770549	Stable	3.5041	0.000101792	3.48813	0.0019689	0.22837	0.804334
201417	chr1	62770950	62771049	Stable	2.49079	0.000206379	3.11047	0.000947549	0.525067	0.426168
201418	chr1	62771250	62771549	Stable	1.65712	0.00614153	3.2159	0.000532288	-0.254762	0.743419
201419	chr1	62771750	62771899	Stable	2.3444	0.000282224	1.44317	0.0229154	0.81924	0.19983
201420	chr1	62772000	62772149	Stable	3.05562	0.000184203	1.27444	0.0157153	0.461666	0.498428
201421	chr1	62776200	62776299	Stable	1.06182	0.0388392	2.23928	0.0034065	-0.582865	0.404544
201422	chr1	62777150	62777299	Stable	1.5783	0.0113304	3.35227	0.000456777	-0.984632	0.23311
201424	chr1	62792950	62793049	Stable	2.44854	0.000254924	2.02555	0.00530417	0.182248	0.845666
201425	chr1	62795850	62795999	Stable	2.19622	0.00186046	1.42883	0.0245024	0.0839426	0.938311
201426	chr1	62823450	62823599	Stable	1.7607	0.00402704	2.62349	0.00290592	-0.0752087	0.947931
201428	chr1	63112600	63115849	Stable	4.16714	1.55559e-05	4.76996	0.00041966	0.0586338	0.954068
201429	chr1	63115900	63116049	Stable	2.93884	9.82674e-05	3.01418	0.00159012	0.31535	0.746314
201430	chr1	63175800	63178049	Stable	4.19811	1.55559e-05	4.38486	0.00041966	-0.0721115	0.944996
201431	chr1	63178300	63178449	Stable	1.95525	0.00147879	2.53341	0.000947965	0.130814	0.881829
201432	chr1	63182300	63182449	Stable	2.83117	0.000184561	2.04667	0.00236311	0.25225	0.746997
201433	chr1	63198950	63199399	Stable	2.79309	0.00010941	3.16824	0.00111709	-0.290529	0.682479
201434	chr1	63199850	63200299	Stable	2.69842	0.000102387	3.03592	0.000561933	-0.0803054	0.932082
201435	chr1	63202150	63202299	Stable	1.91921	0.00154803	3.03853	0.00533478	-0.813275	0.19838
201436	chr1	63445900	63446499	Stable	3.48394	0.000238609	3.17747	0.000484717	0.160967	0.849046
201438	chr1	63507850	63508249	Stable	1.61265	0.00699561	3.22896	0.000446691	-1.31891	0.0718565
201441	chr1	63730000	63731149	Stable	3.69666	1.64337e-05	3.45585	0.000851977	-0.0124014	0.990882
201442	chr1	63731200	63731299	Stable	1.44857	0.00907314	3.0546	0.00388491	-0.183164	0.867534
201443	chr1	63763500	63763599	Stable	1.4	0.02862	2.54109	0.00194999	-0.631641	0.540442
201444	chr1	63763750	63763949	Stable	2.376	0.000330092	2.18615	0.00144157	0.497616	0.466537
201445	chr1	63765800	63766099	Stable	3.03549	6.81022e-05	1.45814	0.0172	1.07626	0.135977
201446	chr1	63766200	63766449	Stable	2.50481	0.000145703	1.39561	0.0168427	0.485262	0.466263
201447	chr1	63766700	63767049	Stable	2.7024	9.4934e-05	1.32455	0.016854	0.884404	0.174355
201448	chr1	63767100	63767249	Stable	2.08414	0.00105768	2.66776	0.000801082	0.268295	0.724425
201449	chr1	63767400	63768149	Stable	3.23216	3.59765e-05	3.69365	0.000499029	0.161425	0.868099
201450	chr1	63768250	63769099	Stable	3.05093	4.3312e-05	3.11271	0.000656383	0.156331	0.853604
201452	chr1	63775950	63778049	Stable	3.64384	1.76924e-05	3.8167	0.00041966	-0.31314	0.680393
201454	chr1	64020450	64021049	Stable	4.62265	1.55559e-05	2.76375	0.00736855	0.792608	0.363413
201455	chr1	64088450	64089049	Stable	3.2135	2.83385e-05	3.39905	0.000454836	0.233456	0.768758
201456	chr1	64097850	64097949	Stable	1.8044	0.00169756	2.93906	0.00190686	0.447771	0.487289
201458	chr1	64117850	64121549	Stable	4.54001	1.55559e-05	4.68381	0.00041966	-0.0296553	0.978311
201459	chr1	64121750	64123249	Stable	4.30859	1.55559e-05	4.66196	0.00041966	0.0697713	0.953034
201460	chr1	64123400	64123499	Stable	1.60148	0.00427973	2.36033	0.0151574	-0.132333	0.885344
201461	chr1	64141900	64142649	Stable	3.03957	4.70983e-05	3.70177	0.00041966	0.0902847	0.919916
201462	chr1	64143100	64144049	Stable	2.8018	7.15616e-05	3.15915	0.000695271	0.247628	0.775155
201463	chr1	64187650	64188249	Stable	3.28392	2.70148e-05	1.47521	0.0122634	1.40877	0.0513775
201464	chr1	64208650	64208949	Stable	1.16619	0.0456273	3.31085	0.000451556	-1.20261	0.12956
201466	chr1	64209650	64209949	Stable	2.40049	0.000398375	3.28657	0.000509637	-0.699358	0.294149
201468	chr1	64222350	64227299	Stable	4.01081	1.55559e-05	3.86028	0.00041966	0.14303	0.872311
201469	chr1	64227450	64228649	Stable	3.37223	2.26837e-05	2.65105	0.00163712	0.25683	0.744974
201470	chr1	64228950	64229049	Stable	2.52448	0.00115517	2.25654	0.00673451	0.433393	0.682517
201471	chr1	64229100	64229399	Stable	2.45707	0.000236248	2.26266	0.0068085	0.098009	0.912917
201474	chr1	64300100	64300249	Stable	1.38949	0.00996198	1.94025	0.0022693	0.0328532	0.973256
201475	chr1	64300400	64302549	Stable	3.86008	1.63893e-05	4.21219	0.00041966	-0.294934	0.68116
201476	chr1	64302750	64303049	Stable	3.02097	4.12805e-05	1.89247	0.010428	0.777471	0.318609
201477	chr1	64304300	64306699	Stable	3.73847	1.63137e-05	4.16636	0.00041966	-0.0615244	0.948569
201478	chr1	64307550	64307649	Stable	2.86164	0.000154242	1.76137	0.0120866	0.220085	0.78146
201479	chr1	64312000	64313599	Stable	3.42748	3.64107e-05	2.79418	0.000648599	0.277027	0.703532
201480	chr1	64316200	64318549	Stable	3.27397	2.59042e-05	2.28783	0.00150411	1.29427	0.0588664
201481	chr1	64318700	64319499	Stable	3.18188	2.92868e-05	3.11032	0.000627794	0.25535	0.730148
201482	chr1	64319550	64319949	Stable	1.96459	0.0020778	2.91255	0.001861	-0.433152	0.650683
201483	chr1	64321250	64321349	Stable	1.99104	0.00232101	3.1925	0.00589811	-1.33135	0.134702
201484	chr1	64321900	64322349	Stable	2.7007	0.00012021	3.47634	0.000611801	-0.683468	0.272211
201485	chr1	64322400	64322999	Stable	1.96536	0.000954796	2.99037	0.000618579	-0.436917	0.501664
201486	chr1	64445800	64445949	Stable	3.32044	0.000126432	1.44921	0.0116115	0.783227	0.208074
201487	chr1	64448500	64448949	Stable	2.51589	0.00021232	2.13278	0.00160854	0.152272	0.86553
201488	chr1	64531650	64534249	Stable	4.20862	1.55559e-05	3.9403	0.00041966	0.123202	0.897242
201489	chr1	64534400	64534549	Stable	2.30953	0.000284055	3.08639	0.00074278	0.241296	0.747647
201490	chr1	64551600	64551699	Stable	2.43513	0.00127612	1.04138	0.0407326	-0.260413	0.820321
201491	chr1	64552350	64552499	Stable	1.79241	0.0127245	2.65676	0.00264487	-1.82122	0.0763434
201492	chr1	64564400	64564799	Stable	2.27651	0.000407945	2.42615	0.000906597	-0.156093	0.86005
201493	chr1	64565350	64565599	Stable	3.27049	2.52585e-05	2.80128	0.00175205	0.0449342	0.965085
201495	chr1	64599950	64600099	Stable	2.35921	0.000329626	2.81609	0.000624458	-0.476061	0.459666
201496	chr1	64600300	64601499	Stable	2.89144	0.000136462	3.74575	0.00041966	-0.822794	0.20034
201497	chr1	64601750	64601849	Stable	1.51603	0.00673357	2.70644	0.00226573	-0.788824	0.245298
201498	chr1	64602000	64602299	Stable	2.28361	0.000325189	3.57495	0.000563453	-1.00858	0.122066
201499	chr1	64614600	64619249	Stable	4.32226	1.55559e-05	4.55907	0.00041966	-0.109121	0.911891
201500	chr1	64619900	64623949	Stable	3.30718	2.60302e-05	4.09765	0.00041966	-0.743845	0.256136
201501	chr1	64624000	64625199	Stable	2.03199	0.00105575	3.61715	0.000718837	-1.01479	0.14108
201503	chr1	64648750	64651049	Stable	3.55153	2.44126e-05	4.13898	0.00041966	-0.4364	0.541982
201505	chr1	64667000	64667199	Stable	1.41755	0.0100446	2.27706	0.00120657	-0.644411	0.320995
201506	chr1	64667850	64667999	Stable	1.21417	0.030684	2.07286	0.00662446	-0.589298	0.430721
201508	chr1	64691000	64692099	Stable	3.73571	2.39475e-05	3.65472	0.000808216	0.115824	0.909675
201510	chr1	64736350	64737749	Stable	3.91336	1.63727e-05	4.09769	0.000447459	0.276294	0.75101
201511	chr1	64738050	64738499	Stable	2.65087	0.000190764	2.36231	0.00459519	0.25624	0.794624
201512	chr1	64738600	64738949	Stable	3.36327	2.6191e-05	2.16006	0.0027001	0.392481	0.564676
201513	chr1	64744550	64744649	Stable	2.69904	0.00106591	1.90701	0.0164189	1.23318	0.0878169
201515	chr1	64787750	64787899	Stable	2.53428	0.000400979	1.34761	0.0131132	0.908736	0.161576
201516	chr1	64790300	64790449	Stable	2.4694	0.000793584	2.32391	0.00424832	-0.111346	0.908159
201517	chr1	64790650	64790749	Stable	2.30528	0.000646815	2.07628	0.00650247	-0.0123595	0.991912
201518	chr1	64790800	64792499	Stable	2.88141	5.37301e-05	3.15996	0.000447472	-0.106825	0.900708
201519	chr1	64792600	64792899	Stable	2.29529	0.000308952	3.63831	0.00137873	-0.359759	0.603838
201520	chr1	64793200	64793799	Stable	3.82336	4.77405e-05	2.3223	0.00375454	0.394771	0.61627
201521	chr1	64795000	64795899	Stable	2.74536	8.95794e-05	2.98278	0.00059711	0.168009	0.847604
201522	chr1	64796300	64796399	Stable	1.36204	0.0105354	2.82456	0.000884472	-0.700946	0.258214
201523	chr1	64797050	64797349	Stable	3.37764	2.56541e-05	2.5598	0.00239796	0.293361	0.757446
201524	chr1	64797550	64797699	Stable	2.55566	0.000420021	2.89189	0.00816432	1.0416	0.194625
201525	chr1	64798400	64798549	Stable	2.3754	0.000281127	2.33698	0.00349389	0.775638	0.265577
201527	chr1	64804350	64807899	Stable	3.24358	3.22543e-05	3.19083	0.000443988	0.414797	0.526912
201528	chr1	64808200	64809299	Stable	3.22018	3.02261e-05	3.72093	0.000424728	-0.0907223	0.921374
201529	chr1	64809450	64810949	Stable	3.24971	2.59921e-05	2.67036	0.000808893	0.534756	0.39521
201530	chr1	64813650	64815049	Stable	3.50422	1.79552e-05	2.98619	0.000805595	-0.112948	0.895787
201531	chr1	64824900	64825049	Stable	2.13068	0.000608905	2.20257	0.00470012	-0.126276	0.904546
201532	chr1	64825400	64826349	Stable	3.363	2.20486e-05	3.30774	0.00045762	0.150116	0.856355
201533	chr1	64826500	64827699	Stable	2.86692	6.47532e-05	2.94473	0.00050726	-0.1811	0.825864
201534	chr1	64839600	64840999	Stable	3.40421	2.23564e-05	2.7438	0.00075937	0.414339	0.532411
201535	chr1	64841300	64842799	Stable	3.55851	2.15872e-05	3.43354	0.000702127	0.775502	0.212337
201536	chr1	64842950	64844799	Stable	3.50385	1.91682e-05	2.43834	0.000959808	0.941081	0.134631
201537	chr1	64845000	64845499	Stable	2.58094	0.000231148	1.93918	0.00254683	0.79715	0.245582
201540	chr1	64851550	64852499	Stable	3.16662	4.3677e-05	2.49178	0.00260027	1.23774	0.0633935
201541	chr1	64852800	64853099	Stable	3.12863	3.18746e-05	2.14244	0.0199865	0.462475	0.53278
201542	chr1	64853550	64853949	Stable	2.44584	0.000289416	2.20752	0.00147042	0.0773987	0.931288
201543	chr1	64854000	64854149	Stable	2.28304	0.000512317	2.04508	0.00798514	0.229069	0.802368
201544	chr1	64854400	64854649	Stable	2.52023	0.000374744	1.95997	0.00309754	0.257953	0.760719
201545	chr1	64855750	64855999	Stable	2.90999	0.00023231	1.67068	0.0199165	0.945877	0.202866
201546	chr1	64858800	64858949	Stable	2.19982	0.000798824	2.67793	0.00582205	0.132166	0.879438
201547	chr1	64859350	64860249	Stable	3.21887	3.40413e-05	3.15042	0.000578801	0.0732182	0.936685
201548	chr1	64860350	64860599	Stable	3.14085	5.55258e-05	2.65737	0.0132002	0.814272	0.19325
201549	chr1	64860800	64861249	Stable	2.51464	0.000243885	3.02089	0.00132455	0.168565	0.854332
201550	chr1	64875600	64875849	Stable	2.27292	0.00043432	2.5317	0.00101379	-0.291719	0.682421
201551	chr1	64875900	64877049	Stable	2.81331	7.35033e-05	3.23067	0.000639103	-0.201472	0.807046
201557	chr1	64917000	64917449	Stable	3.69939	3.8308e-05	2.79211	0.000784128	0.710451	0.290443
201558	chr1	64918000	64919099	Stable	3.21426	2.95873e-05	2.82206	0.000560494	0.411358	0.53986
201559	chr1	64919150	64919649	Stable	3.01115	4.57712e-05	3.13144	0.000787782	0.604796	0.334769
201561	chr1	64956100	64957349	Stable	3.64522	1.75796e-05	3.45754	0.00041966	-0.0440864	0.963638
201562	chr1	64994250	64994599	Stable	3.11966	5.54674e-05	2.73794	0.00101221	-0.252572	0.792877
201563	chr1	65091400	65091549	Stable	1.80779	0.00434785	1.92153	0.00561084	-0.671157	0.343246
201564	chr1	65112350	65112599	Stable	3.17093	0.000120421	2.12348	0.00912842	0.613766	0.33268
201565	chr1	65177200	65177449	Stable	2.05044	0.000936361	3.20077	0.000455123	-0.173764	0.830263
201566	chr1	65177800	65178299	Stable	3.6053	2.34881e-05	2.67122	0.00066032	-0.382974	0.565834
201567	chr1	65178500	65179149	Stable	4.39639	1.55559e-05	3.96042	0.000523333	0.512977	0.486592
201568	chr1	65179300	65179999	Stable	3.6438	1.75529e-05	3.47174	0.000455848	0.147792	0.867241
201569	chr1	65185650	65186549	Stable	4.00646	1.55559e-05	3.35939	0.000445523	0.339447	0.626982
201570	chr1	65186650	65187649	Stable	3.27511	3.76036e-05	4.04082	0.00041966	0.0653881	0.948952
201574	chr1	65246250	65246749	Stable	1.75123	0.00247198	3.44095	0.000478263	-0.469176	0.486604
201577	chr1	66700400	66700649	Stable	3.09417	0.000149617	1.36796	0.0220837	0.780333	0.304219
201578	chr1	66700850	66701849	Stable	3.26681	4.33879e-05	3.61251	0.000425095	-0.0398464	0.969554
201579	chr1	66815350	66816999	Stable	3.63542	1.71312e-05	4.57787	0.00041966	-0.263981	0.729616
201580	chr1	66817150	66817549	Stable	3.39806	4.17966e-05	5.35222	0.000422747	0.150559	0.895842
201581	chr1	66817800	66818149	Stable	2.71568	9.46891e-05	3.43821	0.000500711	0.397562	0.550961
201582	chr1	66838200	66838499	Stable	3.40774	4.30256e-05	2.489	0.00156394	0.3469	0.61035
201583	chr1	66845900	66846049	Stable	2.7841	0.000188513	2.18811	0.0194393	0.377708	0.641804
201584	chr1	66846300	66846799	Stable	2.79236	0.000111398	2.1139	0.00151123	0.353525	0.604394
201585	chr1	66862000	66863449	Stable	3.80292	1.59795e-05	3.82586	0.00041966	0.211348	0.799918
201586	chr1	67038200	67038849	Stable	2.83653	8.7843e-05	3.48508	0.000480413	-0.196194	0.832874
201587	chr1	67039000	67039249	Stable	3.22214	4.23075e-05	2.52895	0.00158845	-0.121987	0.895815
201588	chr1	69242000	69242399	Stable	3.88374	1.63137e-05	2.93795	0.000550679	0.515866	0.471577
201589	chr1	69277150	69277249	Stable	3.36279	0.000171981	1.34606	0.0276129	0.775525	0.341864
201590	chr1	69277850	69277949	Stable	3.72155	5.21418e-05	1.95766	0.0098773	0.825068	0.445301
201592	chr1	69375700	69375849	Stable	2.25508	0.000661343	1.95031	0.00414863	0.573311	0.364647
201593	chr1	69461050	69461149	Stable	1.66304	0.00469363	2.1174	0.00188108	-0.604445	0.363099
201594	chr1	69610250	69610649	Stable	2.2011	0.000458315	2.71661	0.00109866	-0.206867	0.817494
201595	chr1	69611050	69611199	Stable	1.88616	0.00196575	2.15466	0.00278196	0.0413992	0.968425
201596	chr1	69611450	69611549	Stable	1.92567	0.00204722	1.81998	0.00309736	0.0487011	0.964849
201597	chr1	69654850	69655299	Stable	2.01663	0.000913329	3.35161	0.000447837	-0.866957	0.168395
201598	chr1	69655800	69655999	Stable	1.76707	0.0200969	2.28352	0.00447038	-1.27343	0.0662394
201600	chr1	69684800	69684899	Stable	1.61355	0.00377135	2.07737	0.00172367	-0.120871	0.886403
201601	chr1	69685400	69685899	Stable	3.13952	4.92289e-05	3.40984	0.000469358	-0.0557811	0.959122
201602	chr1	69686300	69687349	Stable	3.46795	2.16963e-05	3.15598	0.000519656	-0.00754373	0.994489
201603	chr1	69687500	69688049	Stable	3.18689	4.98869e-05	3.20481	0.000522893	-0.0410485	0.968666
201605	chr1	71003900	71004249	Stable	2.86396	0.000176318	3.1828	0.000855833	-1.49439	0.0592359
201606	chr1	71100200	71100799	Stable	3.00752	4.09333e-05	2.75805	0.000870725	-0.0151332	0.988778
201607	chr1	71100850	71100999	Stable	2.78447	9.52006e-05	1.74774	0.0105259	-0.087031	0.922668
201608	chr1	71101950	71102899	Stable	2.83585	6.87198e-05	2.73242	0.00144603	0.431038	0.574166
201609	chr1	71103250	71103649	Stable	2.86673	6.55331e-05	2.46749	0.00335343	0.347554	0.68003
201610	chr1	71505650	71505899	Stable	2.93992	0.00110693	1.74933	0.0210175	0.354001	0.682644
201611	chr1	71556500	71557899	Stable	3.54353	2.40846e-05	3.59549	0.000484729	0.00656274	0.99564
201612	chr1	71649000	71649149	Stable	3.10877	4.35234e-05	2.1397	0.00386607	0.283751	0.694823
201613	chr1	71649550	71649699	Stable	1.49363	0.0109579	2.04158	0.0108192	0.0272172	0.984874
201614	chr1	71649750	71649899	Stable	3.15567	0.000182104	1.90786	0.00247021	-0.11968	0.888794
201615	chr1	71649950	71655699	Stable	4.20233	1.55559e-05	4.41524	0.00041966	-0.220072	0.789451
201617	chr1	71671750	71672249	Stable	3.276	5.84629e-05	1.44862	0.0215078	1.09367	0.111961
201618	chr1	71673400	71673749	Stable	3.89094	1.56052e-05	1.96295	0.00653329	0.883532	0.221773
201619	chr1	71679250	71683099	Stable	3.49875	1.83383e-05	3.1719	0.000458049	0.0572811	0.951285
201621	chr1	71683700	71683899	Stable	2.33203	0.000725513	2.2643	0.0025605	0.206178	0.81657
201622	chr1	71683950	71684049	Stable	1.40317	0.0129764	3.68364	0.00063073	-0.36508	0.686103
201623	chr1	71686600	71686749	Stable	1.484	0.0165272	3.45886	0.000530253	-0.350854	0.62726
201625	chr1	71691600	71692499	Stable	2.44159	0.000272122	3.74071	0.000449971	-0.318192	0.677864
201626	chr1	71749500	71749699	Stable	3.14025	0.00120003	1.99472	0.00465369	0.488107	0.506837
201627	chr1	71749950	71752399	Stable	3.18164	3.05883e-05	3.92747	0.00041966	-0.441931	0.505695
201628	chr1	71752450	71756849	Stable	3.65528	1.63029e-05	4.2374	0.00041966	-0.205343	0.795127
201629	chr1	71756950	71758249	Stable	2.88422	5.46256e-05	2.62575	0.00101609	-0.0720408	0.940908
201630	chr1	71759400	71759499	Stable	1.5989	0.00840494	1.87259	0.0107263	-0.214103	0.804709
201631	chr1	71759750	71761149	Stable	3.05501	3.88513e-05	2.94057	0.000716418	0.112477	0.902616
201632	chr1	71761450	71765349	Stable	3.94143	1.55559e-05	3.87686	0.00041966	-0.0611947	0.950056
201633	chr1	71766600	71767249	Stable	1.97816	0.00101319	3.34129	0.000441807	-0.88669	0.153403
201634	chr1	71767700	71767999	Stable	2.45913	0.000311665	2.63188	0.00164442	0.142577	0.879289
201635	chr1	71768100	71768449	Stable	1.89042	0.00129148	3.14465	0.00075382	-0.538254	0.406874
201636	chr1	71768550	71768699	Stable	2.2804	0.000490564	2.67727	0.00212049	0.487872	0.545894
201637	chr1	71769600	71769699	Stable	2.32752	0.00119316	1.76714	0.0217275	-0.270476	0.741578
201638	chr1	71770000	71770099	Stable	2.72459	7.98886e-05	1.30839	0.0178566	0.619077	0.345099
201639	chr1	71771300	71772949	Stable	2.84108	6.26824e-05	3.14048	0.000478005	0.122687	0.886748
201640	chr1	71773100	71773499	Stable	2.47217	0.000161321	2.86238	0.000648239	0.142738	0.863098
201641	chr1	71773550	71773649	Stable	1.71814	0.00608319	1.67931	0.0120909	-0.0184491	0.989109
201642	chr1	71787850	71787999	Stable	2.21129	0.00042029	2.15469	0.00540232	0.657569	0.320637
201643	chr1	71788550	71788949	Stable	2.64928	0.000142075	3.14625	0.00152592	-0.284132	0.783436
201645	chr1	71799250	71799449	Stable	3.74869	1.82299e-05	1.40124	0.0307149	1.31745	0.0572037
201646	chr1	71799500	71801799	Stable	3.51228	1.92325e-05	3.35666	0.000421443	0.441033	0.510099
201647	chr1	71801950	71802449	Stable	2.15492	0.000609976	3.04767	0.00142266	-0.0126165	0.99011
201649	chr1	71803200	71803399	Stable	2.93587	8.95794e-05	2.59835	0.00352942	-0.275999	0.701758
201650	chr1	71804400	71804649	Stable	2.06764	0.00136613	3.64205	0.00705584	-0.915576	0.144845
201652	chr1	71805950	71807749	Stable	3.14562	3.13883e-05	4.32755	0.00041966	-0.646081	0.297277
201653	chr1	71807900	71809549	Stable	3.38477	2.19915e-05	4.39772	0.00041966	-0.951361	0.15243
201654	chr1	71809950	71810099	Stable	2.62846	0.000114109	1.56983	0.00860771	-0.443145	0.534463
201655	chr1	71812100	71812249	Stable	1.12566	0.0369729	2.77981	0.00168593	-0.739987	0.356836
201656	chr1	71812500	71812649	Stable	2.34563	0.000283936	2.53599	0.00214756	-0.0671669	0.945894
201657	chr1	71812850	71813149	Stable	1.66363	0.00565585	1.95013	0.00234846	-0.511978	0.428814
201658	chr1	71813700	71817449	Stable	3.16336	3.16043e-05	3.81579	0.00041966	-0.431424	0.511498
201662	chr1	71845250	71845599	Stable	1.82767	0.00184281	2.69787	0.000810752	-1.14764	0.090313
201663	chr1	71850650	71850899	Stable	2.27252	0.00032232	2.59892	0.00131586	-0.136164	0.884259
201664	chr1	71850950	71851049	Stable	2.52887	0.00060234	2.31352	0.00114925	-0.310347	0.750243
201666	chr1	71865050	71866849	Stable	2.53103	0.000139607	3.88768	0.000509803	-0.50542	0.42857
201667	chr1	71876250	71876649	Stable	3.2823	0.000278018	1.90417	0.0097803	0.608417	0.398381
201668	chr1	71876800	71877949	Stable	3.14174	4.57768e-05	2.83751	0.000977017	0.281391	0.704319
201669	chr1	71880050	71882049	Stable	3.37501	2.26985e-05	3.62023	0.00041966	-0.479224	0.458016
201670	chr1	71882450	71882549	Stable	1.31118	0.0410447	3.09456	0.00256844	-0.636363	0.545198
201672	chr1	71884000	71884299	Stable	1.84338	0.0017114	3.10956	0.000503484	-0.601411	0.353662
201673	chr1	71884350	71884849	Stable	3.07003	4.4238e-05	2.00494	0.00278453	-0.233415	0.773248
201674	chr1	71885100	71885199	Stable	1.41219	0.0163133	2.53272	0.00103687	-1.22988	0.0789894
201675	chr1	71885650	71885799	Stable	2.56128	0.000124437	1.92745	0.00359669	-0.0502062	0.960184
201676	chr1	71885900	71889349	Stable	3.57556	1.94141e-05	3.66901	0.00041966	-0.398696	0.551689
201677	chr1	71889550	71889699	Stable	1.83712	0.00203646	2.33755	0.00136044	-0.563342	0.429887
201678	chr1	71889900	71890549	Stable	2.37484	0.000226301	3.23308	0.000444506	-0.707426	0.251317
201679	chr1	71890650	71896899	Stable	3.63942	1.70003e-05	4.04448	0.00041966	-0.416471	0.543549
201680	chr1	71897100	71899049	Stable	2.8872	5.48603e-05	3.3424	0.000437694	-0.0930926	0.917837
201681	chr1	71900100	71900799	Stable	3.58976	1.66199e-05	2.59085	0.00101609	0.139535	0.866385
201683	chr1	71903950	71905499	Stable	3.27331	2.67837e-05	3.13548	0.000521304	0.412877	0.547518
201684	chr1	71905800	71905999	Stable	2.28616	0.000412105	1.39882	0.0213148	0.814904	0.261522
201685	chr1	71906050	71907149	Stable	3.14797	3.17106e-05	2.87807	0.00201441	0.415489	0.53856
201686	chr1	71907200	71907399	Stable	2.09665	0.000598731	2.26153	0.00132438	0.16297	0.844745
201687	chr1	71908350	71911099	Stable	4.11267	1.55559e-05	3.88228	0.00041966	-0.0742281	0.935607
201688	chr1	71911250	71914599	Stable	3.57555	1.72069e-05	4.22154	0.00041966	-0.413938	0.53978
201689	chr1	71915100	71924599	Stable	3.22368	2.7622e-05	4.00995	0.00041966	-0.760051	0.221351
201690	chr1	71924700	71925299	Stable	1.96607	0.000954446	3.17325	0.000562221	-0.49509	0.464738
201691	chr1	71925500	71925899	Stable	1.87502	0.00271216	2.73141	0.000758573	-0.805107	0.196643
201692	chr1	71926250	71926349	Stable	2.22455	0.00285519	2.51393	0.00175978	-0.479324	0.521035
201693	chr1	71935700	71935799	Stable	1.84357	0.00833051	2.68125	0.000822714	0.138884	0.916216
201694	chr1	71936100	71939349	Stable	2.88425	6.52895e-05	3.72366	0.00041966	-0.71117	0.252564
201695	chr1	71939600	71939949	Stable	1.83096	0.00225665	2.98224	0.000749719	-1.08371	0.10344
201697	chr1	71940750	71940899	Stable	1.45045	0.00876213	2.31003	0.00116529	-0.974488	0.130002
201698	chr1	71941800	71942099	Stable	1.41571	0.0094663	3.13945	0.000949638	-0.844758	0.230522
201699	chr1	71942800	71942949	Stable	1.61886	0.00889566	2.61055	0.00376487	-0.476076	0.577896
201701	chr1	71943600	71946799	Stable	3.0362	4.41671e-05	3.89651	0.00041966	-0.60903	0.34699
201702	chr1	71947150	71947699	Stable	2.81021	6.83639e-05	3.17277	0.00045762	-0.266719	0.717763
201703	chr1	71947900	71948049	Stable	2.04726	0.000810814	1.54609	0.0474089	0.829015	0.368101
201704	chr1	71951500	71951749	Stable	2.34849	0.000665789	2.41963	0.0100207	-0.172653	0.841857
201705	chr1	71952450	71952649	Stable	1.86966	0.0112735	2.83909	0.000641781	-0.678111	0.391783
201707	chr1	71953000	71954049	Stable	2.20755	0.000393644	3.34766	0.000443588	-0.53439	0.396825
201708	chr1	71954750	71954949	Stable	2.22426	0.000606481	2.58271	0.000771552	-0.25964	0.748369
201709	chr1	71955150	71956299	Stable	2.59955	0.000145249	3.52962	0.00041966	-0.639194	0.315342
201710	chr1	71956850	71957049	Stable	2.69548	8.78596e-05	2.20798	0.0031447	-0.147668	0.857127
201711	chr1	71957150	71957349	Stable	1.69445	0.00690084	2.74146	0.00705291	0.0367668	0.977531
201712	chr1	71958000	71958599	Stable	2.6477	0.00014486	2.68907	0.00106383	-0.257669	0.730113
201713	chr1	71958800	71959299	Stable	2.54334	0.000131883	2.58349	0.00150704	-0.171308	0.852511
201714	chr1	71961000	71961099	Stable	1.73859	0.00444586	2.18182	0.0106987	-0.102104	0.924885
201715	chr1	71961900	71962099	Stable	1.78438	0.00214184	2.54462	0.0048994	0.0455198	0.964056
201716	chr1	71963050	71963599	Stable	2.19158	0.000505123	2.33377	0.00126213	-0.205559	0.796148
201718	chr1	71964850	71965099	Stable	2.01106	0.00149276	3.54272	0.00174079	-0.268792	0.764949
201719	chr1	71966150	71966249	Stable	2.417	0.000251023	3.22579	0.00172386	0.146961	0.872802
201720	chr1	71967300	71967449	Stable	3.14976	4.95645e-05	1.56015	0.0199829	0.439037	0.575686
201721	chr1	71967500	71968249	Stable	2.67815	0.000105563	2.99703	0.000505669	-0.245632	0.741598
201722	chr1	71968400	71968549	Stable	2.34193	0.00057931	2.42721	0.00683168	0.177681	0.852229
201723	chr1	71969300	71972649	Stable	3.6312	1.62994e-05	4.03847	0.00041966	-0.18136	0.820244
201724	chr1	71972850	71973799	Stable	2.98088	5.53348e-05	3.49802	0.000553979	0.26889	0.722782
201725	chr1	71973900	71974649	Stable	2.49675	0.000166853	2.98171	0.000548401	0.233324	0.754742
201726	chr1	71974700	71975099	Stable	2.64155	0.000498897	2.9868	0.00057327	0.070294	0.940303
201727	chr1	71975250	71975799	Stable	2.60885	0.000129192	3.20853	0.000898747	-0.419808	0.548981
201728	chr1	71975850	71977449	Stable	3.34738	2.29099e-05	3.21151	0.000487559	-0.112121	0.896265
201729	chr1	71977500	71982099	Stable	3.87363	1.55559e-05	3.69794	0.00041966	0.172915	0.831687
201730	chr1	71982200	71984149	Stable	2.95811	5.9623e-05	3.28403	0.000476207	0.211144	0.784486
201731	chr1	71984900	71985149	Stable	1.46711	0.0111486	2.91695	0.00137508	-0.265356	0.760704
201732	chr1	71985600	71985799	Stable	2.04428	0.000878733	2.75516	0.00250914	0.115541	0.917837
201733	chr1	71986000	71987049	Stable	2.45795	0.000182527	2.99719	0.000831194	-0.0484802	0.958612
201734	chr1	71990350	71990749	Stable	1.65873	0.00340712	2.96149	0.00103451	-0.530213	0.477533
201735	chr1	71990850	71991199	Stable	2.50426	0.000453101	2.79333	0.000795923	-0.202879	0.795804
201736	chr1	71991400	71991749	Stable	3.91042	1.55559e-05	2.95654	0.000919856	0.334845	0.661558
201737	chr1	71991950	71992049	Stable	2.19982	0.000798824	1.94214	0.0128313	0.359244	0.685223
201739	chr1	71997600	71997899	Stable	3.44784	2.00064e-05	1.57987	0.0060856	0.288497	0.692217
201740	chr1	71998000	71998149	Stable	1.76911	0.00251896	2.51048	0.000890153	-0.238865	0.757118
201741	chr1	71999600	72003949	Stable	3.96214	1.55559e-05	4.52129	0.00041966	-0.265719	0.726758
201742	chr1	72004800	72004899	Stable	1.58081	0.00487947	2.62375	0.00860902	-0.265388	0.716556
201743	chr1	72006450	72006849	Stable	2.3195	0.000293998	2.3278	0.00140959	-0.324344	0.659976
201744	chr1	72008700	72008799	Stable	3.02955	0.000175667	1.92025	0.00584723	0.102178	0.906243
201746	chr1	72009200	72009499	Stable	1.82934	0.00264796	2.34658	0.00171772	-0.539158	0.426582
201747	chr1	72009750	72010149	Stable	3.07034	3.71202e-05	1.73338	0.00672105	0.0867752	0.927474
201748	chr1	72013600	72013899	Stable	2.35799	0.00111406	2.66318	0.00116932	-0.361038	0.635515
201749	chr1	72014000	72014399	Stable	2.57633	0.000124271	2.37656	0.00193362	0.254762	0.750963
201750	chr1	72014500	72015099	Stable	2.80182	7.66466e-05	3.04471	0.00237094	0.0032722	0.997445
201751	chr1	72015250	72015799	Stable	2.83965	7.58396e-05	3.15381	0.000486975	0.11117	0.897952
201752	chr1	72017400	72017799	Stable	3.47527	2.13488e-05	1.73377	0.00539492	0.0791907	0.933087
201753	chr1	72018350	72018849	Stable	3.18142	3.09755e-05	2.58438	0.00105887	0.0030199	0.997834
201754	chr1	72019000	72019249	Stable	1.94832	0.00203798	2.5477	0.00536105	-0.235444	0.757609
201755	chr1	72019300	72019849	Stable	2.26885	0.000365962	2.49977	0.000973164	-0.130439	0.881
201756	chr1	72021450	72023649	Stable	2.68926	9.37519e-05	3.94417	0.00041966	-0.453515	0.500542
201758	chr1	72029500	72029649	Stable	2.45501	0.000180447	1.76947	0.0050656	0.680555	0.284307
201759	chr1	72033150	72033749	Stable	3.55012	1.81515e-05	3.35503	0.000461812	0.653643	0.310701
201760	chr1	72033850	72033949	Stable	1.25891	0.0175917	1.73304	0.00869987	-0.0394175	0.969332
201761	chr1	72034150	72034799	Stable	2.70475	0.000242016	2.57737	0.000731393	0.450042	0.490247
201762	chr1	72051800	72052649	Stable	1.79896	0.00206147	3.24698	0.000457134	-0.924309	0.145707
201763	chr1	72052900	72053699	Stable	2.38141	0.000226333	3.2652	0.000455035	-0.487813	0.444023
201764	chr1	72059900	72060399	Stable	2.76508	7.51046e-05	1.80909	0.00613072	0.640618	0.306957
201765	chr1	72060650	72061599	Stable	3.25009	4.71969e-05	3.17277	0.00045762	0.17076	0.838424
201766	chr1	72061900	72061999	Stable	2.27287	0.00033782	3.21442	0.00117991	0.473057	0.542751
201768	chr1	72068000	72068449	Stable	1.25067	0.0229364	3.34874	0.000423014	-0.826587	0.223376
201769	chr1	72068500	72071299	Stable	3.59371	1.72666e-05	3.48723	0.000422791	-0.0898505	0.920134
201770	chr1	72074450	72074649	Stable	2.32702	0.000318353	2.65863	0.0077832	-0.389694	0.571724
201771	chr1	72075000	72075149	Stable	1.8042	0.00607823	2.08978	0.00192848	-0.248181	0.756583
201772	chr1	72075900	72076249	Stable	2.60787	0.000205687	2.51365	0.00083961	-0.295431	0.695461
201773	chr1	72077000	72077449	Stable	2.79784	9.93941e-05	2.37052	0.00135153	-0.34413	0.654885
201774	chr1	72078550	72078749	Stable	3.06812	5.14588e-05	1.9849	0.00985994	0.184985	0.869061
201776	chr1	72084500	72084999	Stable	2.55083	0.000130165	2.90028	0.00075886	-0.0205709	0.984668
201777	chr1	72085500	72085699	Stable	2.83723	8.17837e-05	2.81115	0.000663085	0.244945	0.748719
201778	chr1	72103150	72103349	Stable	1.65428	0.0239012	3.37621	0.0045823	-0.920379	0.168384
201779	chr1	72103500	72103749	Stable	1.52381	0.0224432	2.87722	0.00056944	-1.03127	0.108907
201780	chr1	72104750	72105699	Stable	2.0245	0.00111843	3.27004	0.000430937	-1.20937	0.0695677
201781	chr1	72107600	72107849	Stable	1.98787	0.000918021	3.39847	0.000995325	-0.811108	0.202456
201782	chr1	72107950	72108899	Stable	3.38061	2.13088e-05	3.06521	0.000574327	0.123063	0.886434
201783	chr1	72108950	72109699	Stable	2.61608	0.000151511	3.62748	0.00041966	-0.535196	0.443068
201784	chr1	72110550	72110649	Stable	1.93098	0.00475411	2.72603	0.00859026	-0.680275	0.463139
201785	chr1	72113700	72114299	Stable	2.58684	0.000218448	2.97575	0.000635779	-0.843286	0.18894
201786	chr1	72114550	72114849	Stable	2.13833	0.000505485	2.63495	0.00145219	-0.700579	0.305406
201787	chr1	72115050	72115199	Stable	2.17895	0.00077279	2.44899	0.00879113	-1.49451	0.101142
201788	chr1	72119600	72119699	Stable	2.53077	0.00165034	2.42039	0.00269068	0.740527	0.252703
201789	chr1	72119900	72120899	Stable	2.30041	0.000521292	3.40646	0.000425374	-0.155633	0.859639
201790	chr1	72121350	72122399	Stable	2.79564	7.53986e-05	3.08085	0.000524088	0.0287027	0.977374
201791	chr1	72122650	72123799	Stable	3.54366	2.36926e-05	3.47646	0.00041966	0.14442	0.866742
201792	chr1	72124250	72124399	Stable	2.10643	0.000930219	3.14912	0.00478992	-0.0197626	0.987798
201794	chr1	72142150	72142449	Stable	2.74379	0.000389648	1.80489	0.00498073	0.433184	0.531618
201796	chr1	72144700	72145249	Stable	2.45666	0.000168005	3.4038	0.000424971	-0.604687	0.330739
201797	chr1	72211850	72212299	Stable	3.51702	2.40195e-05	3.46874	0.00048741	0.3891	0.625184
201798	chr1	72225800	72226399	Stable	3.79332	1.72666e-05	3.57199	0.000789805	-0.19834	0.844831
201799	chr1	72233700	72233849	Stable	2.01913	0.00221619	1.17387	0.0250179	-0.0763883	0.934322
201800	chr1	72236500	72237099	Stable	4.13674	2.03921e-05	3.93479	0.00041966	-0.0327329	0.978139
201801	chr1	72243350	72244549	Stable	4.24713	1.55559e-05	4.57018	0.00041966	-0.0298343	0.978312
201802	chr1	72254600	72255999	Stable	3.42762	2.39187e-05	3.61773	0.000424971	0.021864	0.984661
201803	chr1	72283700	72284249	Stable	3.18019	3.24904e-05	3.36948	0.000447681	-0.142277	0.864989
201804	chr1	72284550	72284749	Stable	2.27835	0.000353966	3.17319	0.00245751	-0.345994	0.611141
201805	chr1	72306400	72308149	Stable	3.83653	1.56052e-05	4.18923	0.00041966	-0.268479	0.715771
201809	chr1	72428400	72429199	Stable	2.08286	0.000765431	3.71066	0.000430378	-1.409	0.0570291
201818	chr1	72465100	72465449	Stable	2.09175	0.00067463	3.3677	0.000568379	-0.498039	0.48965
201822	chr1	72550700	72551149	Stable	2.51747	0.000224098	3.02907	0.000609638	-0.922103	0.17285
201824	chr1	72582200	72584199	Stable	3.11741	5.28034e-05	3.76337	0.00041966	-0.0832513	0.931565
201825	chr1	72608600	72609249	Stable	1.42053	0.012231	2.91931	0.000544121	-1.11558	0.0885852
201827	chr1	72710550	72712399	Stable	4.08619	1.58593e-05	4.187	0.00041966	-0.361398	0.65139
201828	chr1	72712500	72713049	Stable	1.78871	0.002429	3.47682	0.0013549	-0.911212	0.205532
201829	chr1	72720100	72720449	Stable	3.05627	6.03519e-05	2.37863	0.00209298	0.0176632	0.98752
201830	chr1	72720800	72721549	Stable	2.86345	0.000475397	2.73058	0.00134855	-0.329089	0.665513
201833	chr1	73902600	73902949	Stable	3.04773	5.6798e-05	3.03933	0.000547414	-0.665563	0.335483
201834	chr1	73951400	73951749	Stable	2.30746	0.000343761	2.03357	0.00522927	0.194105	0.828699
201835	chr1	73951950	73952099	Stable	1.83201	0.00407506	2.55476	0.00192848	-0.32938	0.673402
201836	chr1	73954950	73955299	Stable	3.18916	2.8899e-05	2.40846	0.00118871	0.185983	0.814393
201837	chr1	73955750	73956049	Stable	3.19448	5.3852e-05	3.0482	0.00136309	-0.0453427	0.964849
201838	chr1	73956100	73956249	Stable	2.07049	0.00322499	2.44584	0.00291407	0.00811947	0.994007
201840	chr1	73957700	73958399	Stable	2.44129	0.000293937	2.88129	0.000536791	-0.553713	0.379561
201841	chr1	73958700	73958949	Stable	2.14658	0.000483455	2.44696	0.00121444	-0.169467	0.84152
201842	chr1	73959150	73959299	Stable	3.27104	0.00011155	2.94091	0.00228133	-0.409394	0.560594
201843	chr1	73959400	73959499	Stable	1.4741	0.0111015	2.38514	0.00192657	-0.17734	0.841998
201844	chr1	73962350	73963099	Stable	3.35019	2.71743e-05	3.13828	0.00138684	0.207161	0.832526
201845	chr1	73963250	73964499	Stable	3.24521	3.13326e-05	3.43938	0.000460524	-0.0745771	0.93878
201848	chr1	73994400	73994999	Stable	2.74456	9.74555e-05	3.10967	0.000772199	0.507249	0.507326
201849	chr1	73995150	73995349	Stable	2.6187	0.000170648	2.06954	0.00608326	0.482915	0.533444
201850	chr1	73995400	73996149	Stable	2.93837	7.47731e-05	2.63854	0.000727365	0.116458	0.895387
201851	chr1	73996750	73996949	Stable	1.70273	0.00268103	3.78774	0.000726185	0.340695	0.624136
201852	chr1	73997400	73997699	Stable	2.57451	0.000267395	1.67636	0.0142092	0.0994789	0.923275
201853	chr1	73997750	74000349	Stable	3.7199	1.72145e-05	3.51945	0.00043096	0.216767	0.798862
201854	chr1	74000450	74001099	Stable	3.78583	1.83536e-05	1.97116	0.0143565	1.167	0.161486
201855	chr1	74001550	74001799	Stable	1.93609	0.00107141	3.13792	0.00323213	-0.183333	0.816533
201857	chr1	74005000	74005099	Stable	1.7476	0.00956793	2.91944	0.00347526	-0.288125	0.814486
201858	chr1	74007400	74007599	Stable	1.57497	0.00446341	3.14908	0.00107735	-0.201116	0.798943
201859	chr1	74007850	74009449	Stable	2.67261	0.000128582	3.46774	0.000436338	-0.362853	0.626377
201860	chr1	74015200	74016849	Stable	2.87518	8.8826e-05	2.98607	0.00117991	-0.178601	0.860482
201861	chr1	74017050	74017749	Stable	2.6263	0.000150796	3.21234	0.000611272	-0.291393	0.715806
201863	chr1	74025050	74025349	Stable	1.95652	0.00133494	3.15053	0.000606955	-0.0860087	0.93484
201864	chr1	74025800	74026349	Stable	2.78672	0.000318007	2.59588	0.000733402	0.131337	0.877122
201865	chr1	74026400	74028799	Stable	3.59475	2.5801e-05	3.61889	0.000481384	0.119691	0.90924
201866	chr1	74028900	74030299	Stable	2.67906	0.000178303	3.70817	0.000448597	-0.463459	0.558088
201867	chr1	74030400	74032199	Stable	2.83476	7.06541e-05	2.9956	0.000880774	-0.0935765	0.924371
201869	chr1	74035100	74035199	Stable	2.18444	0.000607275	2.04067	0.00480663	0.0864948	0.932244
201871	chr1	74036050	74037449	Stable	3.2903	2.72452e-05	3.29144	0.000452917	0.250299	0.744334
201872	chr1	74040800	74042999	Stable	3.34951	2.54467e-05	3.50441	0.000422747	0.00119787	0.999096
201873	chr1	74043100	74043599	Stable	2.55145	0.000151646	2.67754	0.000655577	0.078319	0.933556
201875	chr1	74048050	74048249	Stable	2.84656	6.72732e-05	2.0419	0.0129816	0.807153	0.204349
201876	chr1	74053500	74054049	Stable	2.61198	0.000124287	2.76577	0.000703761	-0.139408	0.872465
201877	chr1	74054150	74054949	Stable	2.67669	9.62971e-05	3.28359	0.000458009	-0.134106	0.879487
201878	chr1	74065650	74066099	Stable	2.65377	0.000103182	2.71705	0.00076657	0.329062	0.636265
201879	chr1	74066300	74067099	Stable	3.2099	3.82455e-05	3.2908	0.000553992	0.678529	0.300655
201880	chr1	74068900	74068999	Stable	2.3423	0.000351288	2.22521	0.00230559	0.234602	0.754761
201881	chr1	74069150	74069349	Stable	2.38846	0.000725145	2.26657	0.00332191	0.0811822	0.928711
201883	chr1	74083000	74086199	Stable	4.1777	1.55559e-05	3.56321	0.000424971	0.502571	0.464531
201885	chr1	74089850	74093549	Stable	4.50295	1.55559e-05	4.47729	0.00041966	-0.000581348	0.999539
201886	chr1	74093800	74094199	Stable	3.021	4.306e-05	3.19188	0.00363311	0.260604	0.738186
201887	chr1	74094300	74094649	Stable	2.85675	8.04854e-05	3.07905	0.00151387	0.434782	0.562399
201888	chr1	74095450	74095549	Stable	2.39226	0.000419558	2.34417	0.00154595	0.344404	0.633208
201889	chr1	74098200	74099199	Stable	3.11216	3.45281e-05	3.11832	0.000576456	0.210664	0.800345
201891	chr1	74110450	74111549	Stable	3.39496	2.24769e-05	2.70279	0.00122118	0.639334	0.350128
201892	chr1	74111750	74111849	Stable	2.13386	0.000546551	1.99326	0.0294974	0.545947	0.603557
201893	chr1	74111950	74112749	Stable	3.17321	5.00007e-05	2.40832	0.00291026	0.702984	0.346264
201894	chr1	74112850	74113749	Stable	2.94187	9.87642e-05	2.64273	0.000873692	0.107737	0.917507
201895	chr1	74113800	74114299	Stable	2.75645	7.6369e-05	2.82353	0.000599928	0.418785	0.526912
201896	chr1	74115550	74115649	Stable	2.17965	0.00235063	1.8132	0.0237429	0.610508	0.538745
201897	chr1	74118250	74118399	Stable	2.43108	0.000232041	2.30651	0.00531503	0.223677	0.796893
201899	chr1	74122200	74122549	Stable	4.3813	2.34992e-05	1.51889	0.011436	0.863199	0.197093
201900	chr1	74124550	74125049	Stable	3.14554	5.88859e-05	2.4406	0.00226179	0.381818	0.646489
201901	chr1	74149650	74149799	Stable	1.45879	0.0225985	2.9966	0.00111936	-1.1025	0.108011
201903	chr1	74177700	74178449	Stable	1.99994	0.000960255	3.30412	0.000488182	-0.935914	0.136889
201904	chr1	74200950	74201049	Stable	1.56646	0.00520768	1.09943	0.0355358	0.0098238	0.99296
201905	chr1	74205750	74205899	Stable	2.4217	0.000293191	1.66679	0.00580084	0.256885	0.733324
201906	chr1	74236000	74236299	Stable	3.11188	3.69489e-05	1.68906	0.0138286	0.959391	0.204219
201907	chr1	74236550	74237749	Stable	4.0662	1.56394e-05	3.99308	0.00041966	0.297752	0.734995
201908	chr1	74238600	74238749	Stable	2.26987	0.00293144	2.67625	0.000762011	-0.633506	0.38252
201909	chr1	74239900	74240149	Stable	1.38305	0.0221375	2.37172	0.00116265	-0.308463	0.750006
201910	chr1	74240300	74240999	Stable	2.88811	5.40545e-05	2.91257	0.00135812	-0.195114	0.822457
201911	chr1	74241050	74241149	Stable	2.4145	0.00141838	1.54243	0.00716779	-0.259307	0.787695
201913	chr1	74248300	74249949	Stable	3.24424	4.70569e-05	3.51201	0.00041966	-0.135805	0.893788
201915	chr1	74283950	74284649	Stable	2.86374	0.000129369	3.29633	0.000472917	-0.0429494	0.971851
201916	chr1	74285100	74285599	Stable	3.53396	2.2509e-05	2.99168	0.000583842	-0.0410797	0.966967
201917	chr1	74294800	74298999	Stable	3.93207	1.56904e-05	4.2521	0.00041966	-0.0322739	0.976531
201918	chr1	74299100	74299899	Stable	3.1088	3.33228e-05	2.39711	0.00100542	0.480476	0.457092
201919	chr1	74302800	74304899	Stable	4.19249	1.55559e-05	4.37119	0.00041966	0.173111	0.838872
201920	chr1	74309550	74309699	Stable	2.45937	0.00123938	1.64227	0.0354788	-0.0281987	0.985067
201921	chr1	74313850	74313999	Stable	2.56989	0.00018294	2.28454	0.0239644	0.750033	0.272055
201922	chr1	74332900	74333249	Stable	2.53802	0.000259379	2.39111	0.000947073	0.323728	0.650141
201923	chr1	74362150	74362999	Stable	3.22314	9.01766e-05	3.8609	0.000422747	-0.401837	0.608731
201924	chr1	74386250	74388149	Stable	4.0029	1.58386e-05	3.92155	0.00041966	0.0906499	0.927241
201925	chr1	74390400	74391649	Stable	3.39902	2.23548e-05	2.81846	0.00108558	0.499032	0.465989
201926	chr1	74391750	74393499	Stable	4.48542	1.55559e-05	4.71752	0.00041966	0.0638664	0.952522
201927	chr1	74396450	74397349	Stable	3.7671	1.70438e-05	3.93334	0.000423014	0.269163	0.745751
201928	chr1	74397550	74398299	Stable	4.14616	1.55559e-05	3.21821	0.000533093	0.478443	0.5231
201929	chr1	74505200	74505749	Stable	2.98104	5.53037e-05	3.35756	0.000607742	0.5997	0.414706
201930	chr1	74506050	74507599	Stable	3.90231	1.56929e-05	3.57937	0.000421443	0.0205631	0.985342
201931	chr1	74586800	74588149	Stable	3.64254	1.77107e-05	3.75736	0.00041966	-0.0625516	0.95102
201932	chr1	74588400	74588799	Stable	4.03049	2.5619e-05	2.73386	0.000773837	-0.0506271	0.959116
201933	chr1	74600700	74601849	Stable	3.79754	1.70954e-05	3.21072	0.00107417	0.407534	0.616289
201934	chr1	74609750	74611649	Stable	2.92746	5.31418e-05	3.57299	0.00043868	-0.112999	0.901118
201935	chr1	74661700	74662649	Stable	3.88113	2.13802e-05	3.65982	0.00041966	0.0655094	0.948578
201936	chr1	74748900	74749499	Stable	2.88303	0.000117469	2.63502	0.00105521	0.237994	0.767862
201937	chr1	74769850	74769999	Stable	2.67038	0.00045746	1.85074	0.0234168	1.68507	0.0716541
201939	chr1	74775000	74775149	Stable	2.86316	0.00127765	2.13215	0.0137341	1.37364	0.0811246
201941	chr1	74794700	74794849	Stable	2.27066	0.00065764	3.04211	0.00171415	0.0335692	0.972872
201942	chr1	74807300	74807999	Stable	3.24576	2.84561e-05	2.22496	0.00136062	0.538393	0.408236
201943	chr1	74816600	74817499	Stable	3.23076	3.46525e-05	3.03709	0.000482996	0.52249	0.442657
201944	chr1	75123950	75125899	Stable	4.18263	1.55559e-05	4.19181	0.00041966	0.0486585	0.960183
201945	chr1	75127750	75127899	Stable	1.65533	0.00668668	2.46607	0.00324311	-0.751148	0.268694
201946	chr1	75128100	75129799	Stable	2.8237	6.94553e-05	3.36423	0.000440771	-0.712054	0.253301
201947	chr1	75140550	75140849	Stable	1.72485	0.00754796	2.99658	0.000720274	-1.15614	0.0808923
201948	chr1	75141050	75143699	Stable	4.3522	1.55559e-05	4.39629	0.00041966	-0.0305199	0.977507
201949	chr1	75168000	75169499	Stable	3.68488	1.75815e-05	3.34086	0.000436891	0.254435	0.755607
201950	chr1	75179750	75180299	Stable	2.62714	0.000233881	2.39206	0.00105451	0.136716	0.878504
201951	chr1	75191100	75191999	Stable	3.24982	3.43349e-05	4.0185	0.00041966	-0.321185	0.673503
201952	chr1	75192050	75193349	Stable	3.69017	1.73968e-05	3.70596	0.000531716	-0.0546938	0.957046
201953	chr1	75208650	75210099	Stable	3.48355	2.44365e-05	3.92989	0.00041966	-0.294959	0.706335
201954	chr1	75210300	75211549	Stable	3.45842	2.73125e-05	3.70366	0.00041966	0.0371239	0.973489
201955	chr1	75218300	75218649	Stable	2.87949	5.99069e-05	2.32568	0.00432332	0.386984	0.590971
201956	chr1	75218700	75219249	Stable	2.6875	0.000112143	2.97271	0.00053401	0.104599	0.905807
201957	chr1	75221750	75221949	Stable	2.04693	0.00144107	2.36152	0.0015202	-0.797709	0.301515
201958	chr1	75222100	75222199	Stable	2.47506	0.000932733	2.39168	0.00141957	-0.853243	0.228357
201960	chr1	75229450	75229949	Stable	2.56049	0.000203093	3.27042	0.00152642	-0.360875	0.628114
201961	chr1	75230150	75230399	Stable	2.04854	0.00274836	2.64203	0.0019971	-1.17057	0.0942865
201963	chr1	75231600	75231699	Stable	2.02199	0.00102763	1.96215	0.00660626	-0.595122	0.38222
201964	chr1	75235400	75235649	Stable	2.55191	0.000260574	2.23411	0.0014329	0.98914	0.120327
201965	chr1	75235700	75236349	Stable	3.72878	1.70002e-05	3.63244	0.00041966	0.0838136	0.925414
201966	chr1	75236400	75237499	Stable	4.28274	1.55559e-05	3.58819	0.000422747	0.164397	0.870555
201967	chr1	75247850	75248999	Stable	3.32017	3.57342e-05	2.92024	0.000613654	-0.181985	0.846955
201968	chr1	75249150	75249399	Stable	3.57834	0.000100921	2.48481	0.00227701	-0.358645	0.657181
201969	chr1	75249500	75249599	Stable	2.21096	0.000424557	2.511	0.000972522	-0.64139	0.315949
201970	chr1	75249800	75249949	Stable	2.45604	0.00125079	3.05482	0.00127108	-0.825908	0.276792
201971	chr1	75263400	75264499	Stable	3.48038	3.00956e-05	3.72945	0.000470114	0.062954	0.957019
201972	chr1	75291750	75294499	Stable	3.37239	3.55705e-05	3.75855	0.00041966	-0.36827	0.654704
201973	chr1	75296100	75296399	Stable	2.19342	0.000463717	2.03211	0.0055084	-0.134065	0.895503
201974	chr1	75316300	75317499	Stable	3.58687	2.098e-05	3.6941	0.000421013	0.146819	0.878782
201975	chr1	75318150	75318799	Stable	3.58773	2.79674e-05	2.99308	0.000659579	0.353347	0.62667
201976	chr1	75359050	75359299	Stable	2.48184	0.00020778	1.73958	0.00495739	0.0840142	0.92597
201977	chr1	75359350	75359449	Stable	1.82115	0.0060372	2.90367	0.00052576	-0.0170629	0.989976
201978	chr1	75381300	75382099	Stable	3.96054	1.56052e-05	3.11716	0.000753356	0.522425	0.498439
201979	chr1	75382200	75383149	Stable	3.78032	1.58593e-05	3.44813	0.000455957	0.200264	0.807079
201980	chr1	75391950	75394349	Stable	4.04468	1.55559e-05	3.6305	0.000424869	0.223256	0.794416
201981	chr1	75398350	75398449	Stable	1.5526	0.01448	2.48151	0.00150704	-0.180121	0.822825
201982	chr1	75398650	75401199	Stable	3.68527	1.71312e-05	3.95987	0.00041966	-0.109394	0.906398
201983	chr1	75435200	75435299	Stable	2.7841	0.000188513	1.88262	0.00257858	-0.120871	0.886403
201984	chr1	75435350	75436999	Stable	3.33067	3.17052e-05	3.88507	0.00041966	0.0288489	0.979442
201985	chr1	75458200	75459149	Stable	3.11852	6.85006e-05	3.6365	0.000701874	-0.137476	0.884798
201986	chr1	75467500	75467649	Stable	2.29506	0.000374351	2.7312	0.00185603	-0.0887075	0.923663
201987	chr1	75474650	75474849	Stable	3.69583	2.01159e-05	1.35119	0.0259366	0.631508	0.33237
201988	chr1	75478350	75479449	Stable	3.89591	1.63164e-05	3.91613	0.00041966	0.024704	0.982604
201989	chr1	75504550	75507399	Stable	4.63089	1.55559e-05	4.61071	0.00041966	0.249954	0.776027
201992	chr1	75518050	75519049	Stable	3.40137	2.65741e-05	2.44401	0.00118128	0.848615	0.189239
201993	chr1	75519250	75522399	Stable	4.35589	1.55559e-05	3.74444	0.00041966	0.359829	0.608409
201994	chr1	75523700	75523849	Stable	2.00539	0.000800852	1.9563	0.00287076	-0.149642	0.86086
201995	chr1	75524100	75524249	Stable	2.43431	0.000221682	2.80032	0.000579191	-0.420389	0.522606
201997	chr1	75545550	75546999	Stable	3.96886	1.55559e-05	4.17378	0.00041966	0.296387	0.724544
201998	chr1	75547050	75547349	Stable	2.91958	5.16421e-05	1.98909	0.00451843	1.02714	0.144242
201999	chr1	75558900	75559499	Stable	2.92064	5.89525e-05	2.926	0.000716369	0.294173	0.694195
202000	chr1	77364050	77364399	Stable	2.37329	0.000728485	3.25089	0.00115873	-0.050443	0.960228
202001	chr1	77364850	77365399	Stable	3.25023	2.56869e-05	3.06029	0.00154845	-0.507805	0.423035
202003	chr1	77460550	77463349	Stable	3.67378	1.65162e-05	3.61967	0.00041966	0.0496771	0.958786
202005	chr1	77469450	77470099	Stable	2.43076	0.000248455	2.82467	0.000630277	-0.373995	0.614105
202006	chr1	77470250	77472449	Stable	3.81188	1.58694e-05	3.72481	0.00041966	0.243327	0.749331
202008	chr1	77488450	77488599	Stable	1.8406	0.0205624	2.41276	0.00122002	-0.50914	0.518126
202009	chr1	77488650	77489149	Stable	2.79145	0.000204709	3.72904	0.00083458	-0.966902	0.191446
202010	chr1	77489200	77489499	Stable	2.36675	0.000261063	2.33271	0.0106259	-0.351437	0.734983
202011	chr1	77489850	77490049	Stable	1.5146	0.00574684	2.75946	0.00181351	-1.10711	0.146132
202012	chr1	77490450	77490849	Stable	2.70339	8.35539e-05	2.29036	0.00145914	-0.391572	0.560693
202013	chr1	77490950	77491049	Stable	1.76096	0.00293093	3.05228	0.00196471	-0.130902	0.915102
202014	chr1	77491300	77491599	Stable	2.62743	0.000434363	1.905	0.0060829	0.146459	0.890353
202016	chr1	77503100	77504749	Stable	3.49205	1.92422e-05	3.19934	0.000510148	-0.0360836	0.970783
202017	chr1	77513750	77514949	Stable	3.19774	2.81458e-05	3.02551	0.000906597	0.100024	0.911948
202019	chr1	77535300	77535899	Stable	3.06515	3.88398e-05	1.57647	0.00758822	0.980388	0.13356
202020	chr1	77536350	77536499	Stable	2.21745	0.000651752	2.23172	0.00147	-0.883061	0.181807
202021	chr1	77802450	77802549	Stable	2.47199	0.000167384	1.63796	0.00586061	0.527011	0.411638
202022	chr1	77845300	77846099	Stable	1.87533	0.00181792	3.15954	0.000952744	-0.879115	0.192799
202023	chr1	77846300	77846999	Stable	2.92055	8.16684e-05	3.433	0.000460982	-0.484581	0.467252
202024	chr1	77847600	77848199	Stable	2.25759	0.00032754	3.5193	0.000458293	-0.408757	0.534005
202025	chr1	77848550	77848649	Stable	1.95236	0.00126223	3.18483	0.00270233	-0.383084	0.620684
202027	chr1	77858700	77860899	Stable	3.3348	2.66021e-05	3.66408	0.00041966	-0.20372	0.799248
202028	chr1	77868650	77868749	Stable	2.26983	0.000615886	1.48253	0.00798966	-0.0567511	0.951862
202029	chr1	77869600	77869699	Stable	2.01969	0.00109736	2.56694	0.00659704	-0.0880079	0.921621
202030	chr1	77870850	77871049	Stable	2.3261	0.000668847	2.56636	0.00305562	0.459642	0.635766
202031	chr1	78435800	78437599	Stable	2.11089	0.000706162	3.5697	0.000476782	-1.12624	0.0837888
202033	chr1	78447600	78447699	Stable	2.26173	0.00229665	3.37416	0.00290663	-1.0256	0.159646
202034	chr1	78448000	78448949	Stable	2.36659	0.000225461	3.38714	0.000419815	-0.464272	0.46932
202037	chr1	78487800	78489849	Stable	3.57208	1.82336e-05	4.11477	0.00041966	-0.212996	0.788746
202038	chr1	78537000	78537449	Stable	3.63293	3.41488e-05	3.56563	0.000421443	-0.565666	0.376999
202039	chr1	78537750	78538549	Stable	2.72436	0.000115271	3.5678	0.00041966	-0.689695	0.272763
202040	chr1	78538900	78538999	Stable	1.95279	0.00365949	1.94428	0.0159799	0.391671	0.672103
202044	chr1	78585500	78585799	Stable	1.1576	0.028748	2.57373	0.000831167	-0.890777	0.165902
202045	chr1	78585950	78586049	Stable	2.50825	0.000297158	3.14027	0.000768442	-0.649	0.346885
202046	chr1	78587000	78587149	Stable	2.12639	0.000969363	2.96792	0.000561035	-0.599671	0.418677
202047	chr1	78649100	78649249	Stable	3.29593	3.10399e-05	2.45547	0.0068735	0.347051	0.679386
202048	chr1	78649650	78649749	Stable	1.93261	0.00210025	1.57782	0.0422699	-0.0240597	0.980782
202049	chr1	78649850	78649999	Stable	1.87282	0.00301705	2.06264	0.00862029	0.519601	0.514929
202051	chr1	78656400	78659049	Stable	4.4749	1.55559e-05	3.4789	0.000429323	0.67511	0.325049
202052	chr1	78724950	78725249	Stable	2.5696	0.000167384	2.94027	0.000507192	-0.109702	0.897838
202053	chr1	78725550	78725799	Stable	2.26062	0.000372315	2.86937	0.000532449	-0.327902	0.645833
202054	chr1	79696750	79696899	Stable	1.48541	0.0167226	2.19693	0.00139838	-0.420427	0.569824
202055	chr1	79697600	79698199	Stable	2.97116	0.000117824	3.66649	0.000426677	-0.399829	0.54435
202056	chr1	79732850	79733149	Stable	1.76678	0.00220413	3.40993	0.00126167	-0.556211	0.390164
202057	chr1	79745900	79746299	Stable	2.08968	0.000606481	4.00416	0.00041966	-0.138085	0.871028
202059	chr1	79759750	79760249	Stable	2.56261	0.000215307	3.25173	0.000921927	-0.203191	0.827937
202060	chr1	79760600	79762349	Stable	3.7655	1.63289e-05	4.18657	0.00041966	0.171977	0.846648
202061	chr1	79762500	79762599	Stable	2.4897	0.000232271	1.8205	0.00334138	0.763244	0.252634
202062	chr1	79775500	79775949	Stable	2.7428	0.000116971	3.09475	0.000550546	-0.384892	0.582803
202063	chr1	79776100	79776699	Stable	3.53558	2.10239e-05	3.4681	0.000422747	0.355543	0.643355
202064	chr1	80339250	80340699	Stable	4.22216	1.55559e-05	3.50375	0.00046091	0.629968	0.362981
202065	chr1	80341050	80341649	Stable	3.17751	4.18376e-05	3.60817	0.0004814	-0.0600417	0.950921
202068	chr1	81538250	81539649	Stable	3.43879	2.23284e-05	2.80034	0.000662586	1.12377	0.0979276
202069	chr1	81540000	81540599	Stable	3.6579	1.91371e-05	3.06567	0.00135729	0.870626	0.161108
202072	chr1	81660950	81661249	Stable	2.50631	0.000204985	3.06996	0.00582579	-0.189298	0.818106
202073	chr1	81677450	81677749	Stable	3.1106	8.44408e-05	2.62869	0.0040716	0.196558	0.826692
202074	chr1	81677950	81678049	Stable	2.32165	0.000741434	2.13468	0.00258907	0.875693	0.193903
202075	chr1	81678150	81678699	Stable	3.47265	2.80023e-05	2.48908	0.00308852	0.513076	0.526436
202079	chr1	81737350	81737599	Stable	2.53863	0.000170026	2.89757	0.00124246	-0.0685716	0.943315
202080	chr1	81737900	81740049	Stable	2.92054	5.11374e-05	3.85379	0.00041966	-0.471048	0.48853
202081	chr1	81740200	81741449	Stable	2.79346	6.72416e-05	3.57203	0.000427392	-0.575193	0.360877
202082	chr1	81742600	81743049	Stable	2.22194	0.0004633	3.61401	0.000424971	-0.527997	0.425164
202083	chr1	81743700	81744549	Stable	2.19609	0.000471092	2.76797	0.000784011	-0.550618	0.392937
202084	chr1	81744750	81745199	Stable	2.23701	0.000469911	3.38565	0.000786406	-0.983928	0.144427
202085	chr1	81745350	81745999	Stable	1.63137	0.00564269	3.4767	0.000435241	-1.41911	0.0611702
202088	chr1	81759550	81760799	Stable	3.01324	4.21642e-05	3.69331	0.00041966	-0.321022	0.643472
202089	chr1	81863750	81863899	Stable	2.3618	0.00180857	1.28503	0.0368151	1.58433	0.0504816
202093	chr1	81884550	81885049	Stable	2.86993	9.64936e-05	3.11361	0.000666089	0.236245	0.795192
202094	chr1	81885250	81885449	Stable	2.729	9.79997e-05	3.06305	0.000559868	0.196378	0.814259
202096	chr1	81902850	81905449	Stable	3.97919	1.55559e-05	3.59245	0.00041966	0.283282	0.703682
202101	chr1	81911600	81913399	Stable	4.06295	1.55559e-05	3.16389	0.0004502	0.863798	0.171794
202102	chr1	81913600	81915449	Stable	3.80636	1.55559e-05	2.73544	0.000627237	0.779736	0.206892
202103	chr1	81916000	81916149	Stable	2.39369	0.000576798	2.0433	0.00197908	0.46689	0.538981
202107	chr1	81926400	81926499	Stable	3.35779	2.17833e-05	1.58296	0.0124855	0.540648	0.414793
202108	chr1	81939250	81939399	Stable	1.75303	0.00359462	2.23461	0.0113338	-0.166583	0.880068
202109	chr1	81939550	81939749	Stable	2.495	0.000565187	2.5132	0.00150801	-0.0210287	0.985086
202110	chr1	81939800	81940349	Stable	3.77104	0.000104326	3.64093	0.000481647	0.20329	0.803398
202116	chr1	81954950	81955199	Stable	4.0446	1.77599e-05	2.29059	0.0014672	0.522702	0.425254
202117	chr1	81955350	81955549	Stable	2.28956	0.000885475	3.60566	0.00230985	-0.816137	0.298239
202118	chr1	81955600	81956149	Stable	3.31869	2.37034e-05	2.0032	0.00225425	0.838291	0.188023
202119	chr1	81956450	81956549	Stable	2.57929	0.000260066	1.52621	0.0346272	0.891145	0.219726
202124	chr1	81966900	81967349	Stable	2.97959	0.000135269	2.14964	0.00484093	1.07881	0.102205
202125	chr1	81967600	81967799	Stable	2.65805	0.000181885	2.27706	0.00120657	0.497278	0.45042
202127	chr1	81978700	81978799	Stable	3.27264	8.36066e-05	2.09179	0.0256303	1.25725	0.151899
202129	chr1	81986850	81987049	Stable	3.22555	0.000124437	1.27709	0.0257485	0.837895	0.20369
202130	chr1	81987550	81987749	Stable	2.7659	0.000106921	2.55464	0.00359365	0.865242	0.17187
202131	chr1	81988000	81988149	Stable	2.86411	0.000387184	2.61176	0.000909591	0.292815	0.697401
202149	chr1	82039550	82039949	Stable	2.86777	5.62046e-05	2.15556	0.00295431	0.940896	0.137069
202150	chr1	82040100	82041249	Stable	3.8147	1.56394e-05	3.23705	0.000660284	0.938157	0.152072
202151	chr1	82041400	82042149	Stable	3.48629	2.01484e-05	3.2026	0.000515023	0.571681	0.400599
202153	chr1	82068950	82069049	Stable	1.67462	0.00726347	1.17509	0.0488034	0.438783	0.659125
202154	chr1	82109900	82110099	Stable	3.04962	0.000110228	2.16539	0.0055811	1.03505	0.148375
202155	chr1	82111050	82111149	Stable	1.88042	0.0071007	3.32816	0.000422791	0.0549919	0.966491
202156	chr1	82111250	82111399	Stable	2.34029	0.000494048	1.36087	0.0214445	1.05926	0.153674
202157	chr1	82112600	82113199	Stable	3.02758	6.93779e-05	2.26891	0.00125977	0.989083	0.13566
202162	chr1	82258900	82259099	Stable	2.7932	0.000111544	2.26743	0.00319941	0.255354	0.736491
202163	chr1	82282250	82286649	Stable	3.98647	1.55559e-05	4.03551	0.00041966	-0.0451176	0.962053
202164	chr1	82286700	82287399	Stable	2.73132	0.000111575	2.92495	0.000998394	0.31929	0.65694
202165	chr1	82287650	82288049	Stable	2.99359	0.000116237	2.35391	0.00113062	1.08145	0.10515
202166	chr1	82289000	82292449	Stable	4.17803	1.55559e-05	3.69023	0.000454842	0.67917	0.333735
202168	chr1	82315800	82317649	Stable	3.9063	1.59983e-05	4.2134	0.00041966	0.145305	0.881568
202169	chr1	82362100	82362199	Stable	1.50348	0.0165937	1.99278	0.00256994	-0.836285	0.263952
202170	chr1	82371700	82371799	Stable	1.84086	0.00627865	2.62356	0.00094106	-1.31494	0.092528
202172	chr1	82724300	82725849	Stable	3.93758	1.56151e-05	4.55148	0.00041966	-0.186887	0.823945
202173	chr1	82785750	82786399	Stable	3.10006	0.000100118	2.31233	0.0022553	0.533032	0.419583
202174	chr1	82787650	82788549	Stable	2.76735	0.000117877	3.27463	0.000430937	0.00957625	0.993446
202176	chr1	82796000	82796299	Stable	3.23497	2.69751e-05	1.52561	0.00760831	0.39508	0.557542
202178	chr1	82808150	82808299	Stable	1.86809	0.00181957	3.61641	0.00061542	-0.991202	0.144622
202179	chr1	82808750	82809499	Stable	3.22456	2.7442e-05	2.8661	0.000716622	-0.210454	0.787896
202180	chr1	82831800	82831899	Stable	2.11566	0.011404	2.44133	0.00155194	-0.30437	0.682397
202181	chr1	82832150	82832249	Stable	3.13094	3.21442e-05	1.8586	0.0295731	0.383647	0.645991
202182	chr1	82834400	82834549	Stable	1.92166	0.00149208	2.4735	0.00119862	-0.299507	0.673402
202183	chr1	82834650	82834849	Stable	2.39766	0.000234962	1.63167	0.0241762	0.496116	0.439609
202184	chr1	82834950	82835149	Stable	2.57034	0.000250199	1.82924	0.00400304	0.333626	0.66397
202185	chr1	82838900	82840199	Stable	3.91896	1.57133e-05	4.04219	0.000504055	0.508636	0.502588
202186	chr1	82840250	82840449	Stable	2.70858	0.000337608	3.48783	0.00187845	0.350062	0.706075
202187	chr1	84407400	84407599	Stable	1.43204	0.0349962	2.56292	0.00122498	-1.47918	0.136729
202188	chr1	84838050	84838549	Stable	2.84069	0.000248504	3.06936	0.00211733	-0.000382674	0.999736
202189	chr1	84838650	84841149	Stable	3.84355	1.83492e-05	4.13231	0.00041966	-0.0228025	0.985055
202192	chr1	84880850	84881849	Stable	2.34495	0.000320859	2.9793	0.000651244	-0.809089	0.217569
202195	chr1	85650100	85650299	Stable	1.56472	0.0134582	2.86844	0.00132432	-0.378875	0.69658
202196	chr1	85736400	85736549	Stable	1.69278	0.00464397	2.1945	0.00429738	-0.567967	0.458554
202197	chr1	85793400	85795149	Stable	3.84719	1.61571e-05	3.63729	0.000421443	0.111258	0.907297
202199	chr1	85894650	85896099	Stable	3.21403	3.53955e-05	3.56618	0.00041966	-0.0732943	0.940746
202202	chr1	86015850	86015999	Stable	2.58295	0.000294015	3.17644	0.00141971	0.0170498	0.990456
202203	chr1	86031600	86033299	Stable	3.3854	2.34545e-05	3.75241	0.00041966	-0.241427	0.75856
202204	chr1	86063850	86065549	Stable	4.37539	1.55559e-05	4.13618	0.00041966	0.115545	0.906703
202205	chr1	86146450	86146949	Stable	2.1788	0.00046723	3.1944	0.000749834	-0.4277	0.53691
202206	chr1	86147200	86147549	Stable	1.66543	0.00439282	3.18827	0.000548401	-1.30531	0.0673925
202207	chr1	86147700	86148049	Stable	1.74283	0.00288497	3.30233	0.000615803	-0.782505	0.222124
202208	chr1	86153700	86154699	Stable	3.77123	1.63237e-05	3.36258	0.000592728	0.216874	0.812218
202212	chr1	86290800	86291149	Stable	1.36235	0.0173959	2.66812	0.000712925	-1.33291	0.0698844
202216	chr1	86301150	86301349	Stable	1.74903	0.00285752	2.7412	0.000863469	-1.06336	0.118442
202217	chr1	86358300	86359399	Stable	3.91509	1.62801e-05	4.03305	0.00041966	0.0727416	0.947524
202218	chr1	86359600	86360649	Stable	3.84977	1.71476e-05	3.91357	0.00041966	-0.0743483	0.947212
202219	chr1	86360900	86361049	Stable	1.62005	0.0108243	3.06167	0.00101721	0.295059	0.748827
202221	chr1	86433300	86436099	Stable	4.28842	1.55559e-05	4.38066	0.00041966	0.26816	0.752147
202223	chr1	86437200	86437399	Stable	2.6095	0.000329818	1.71401	0.00976965	0.935394	0.158607
202224	chr1	86437600	86438699	Stable	3.36272	4.20488e-05	2.79587	0.000673166	0.379735	0.630519
202225	chr1	86438750	86439249	Stable	2.72387	8.90495e-05	2.63746	0.00161197	0.225369	0.769139
202226	chr1	86439450	86443799	Stable	4.28113	1.55559e-05	4.22426	0.00041966	-0.0679795	0.947908
202227	chr1	86444100	86444349	Stable	2.58883	0.000792913	2.36884	0.00191827	-0.451103	0.495977
202228	chr1	86447450	86449599	Stable	3.50044	2.19513e-05	3.93935	0.00041966	-0.599138	0.381192
202230	chr1	86464300	86465349	Stable	3.0743	4.21576e-05	2.6193	0.000717544	0.396906	0.558398
202231	chr1	86465400	86465499	Stable	2.27608	0.000584274	1.2389	0.0169686	0.168377	0.849248
202232	chr1	86469550	86469849	Stable	2.29582	0.000890595	3.18911	0.000640889	-0.432711	0.507816
202233	chr1	86470150	86473349	Stable	3.34638	3.05247e-05	3.86579	0.00041966	-0.156607	0.867435
202234	chr1	86486700	86487499	Stable	3.58765	2.75025e-05	4.70963	0.00041966	-0.16911	0.863254
202235	chr1	86487700	86489149	Stable	4.61079	1.55559e-05	4.82639	0.00041966	-0.108527	0.913135
202237	chr1	86491900	86492749	Stable	2.86891	6.70146e-05	2.7457	0.00123289	0.198484	0.830382
202238	chr1	86501200	86501499	Stable	1.75209	0.00244952	2.4794	0.00254883	-0.249934	0.753957
202239	chr1	86502350	86502499	Stable	3.33962	0.000208515	2.43035	0.00103007	0.844132	0.181785
202240	chr1	86502750	86502999	Stable	3.36089	8.39812e-05	3.20666	0.000645267	0.589554	0.349951
202241	chr1	86503150	86505799	Stable	4.26028	1.55559e-05	3.97453	0.00041966	0.140006	0.881829
202242	chr1	86506100	86506449	Stable	2.88173	6.02131e-05	2.35153	0.00624725	-0.00444697	0.99679
202243	chr1	86506500	86506599	Stable	1.56269	0.00482544	2.39111	0.00371845	0.156931	0.872636
202244	chr1	86509600	86510049	Stable	2.70541	0.000168122	3.11376	0.000729609	0.00218728	0.998489
202245	chr1	86510150	86510399	Stable	1.45595	0.0104864	2.95406	0.000599065	-1.21566	0.0754996
202246	chr1	86511200	86511349	Stable	2.2099	0.000673652	1.50789	0.016945	0.778211	0.290727
202248	chr1	86512500	86512649	Stable	2.78479	0.000113429	1.22007	0.0319296	0.849106	0.215062
202249	chr1	86515950	86516449	Stable	4.32713	3.44061e-05	1.57327	0.0233011	0.659625	0.379622
202250	chr1	86521800	86526349	Stable	4.29356	1.55559e-05	4.11217	0.00041966	0.111266	0.912459
202251	chr1	86526750	86528799	Stable	3.97009	1.56394e-05	4.13166	0.000435485	0.0252148	0.983457
202252	chr1	86529250	86529349	Stable	1.86227	0.0035865	2.35321	0.00131258	-0.342738	0.716897
202253	chr1	86532000	86532099	Stable	1.32973	0.0226049	3.16316	0.00206967	-0.245236	0.811687
202254	chr1	86557800	86557899	Stable	2.85951	8.70332e-05	3.08975	0.00367554	0.0645375	0.950438
202255	chr1	86580100	86580299	Stable	1.08952	0.0428638	2.2545	0.0043581	-1.36124	0.0897519
202256	chr1	86581750	86581999	Stable	2.62534	0.000217571	3.02321	0.00103488	-0.298769	0.719248
202257	chr1	86582100	86583399	Stable	3.09591	3.95538e-05	3.83602	0.00041966	-0.334872	0.646489
202258	chr1	86586700	86587649	Stable	3.24079	3.50392e-05	3.07609	0.000648568	0.18854	0.829349
202259	chr1	86618800	86619549	Stable	2.3792	0.000359836	3.49163	0.000478964	-0.723253	0.257804
202260	chr1	86621050	86625299	Stable	3.72231	1.64462e-05	4.56729	0.00041966	-0.693868	0.289025
202261	chr1	86625450	86625599	Stable	1.70218	0.00408676	2.57828	0.00161701	-0.755853	0.259249
202262	chr1	86626050	86626649	Stable	1.6546	0.00395941	2.64654	0.000870624	-1.18443	0.071862
202263	chr1	86626800	86626999	Stable	1.39877	0.0200213	2.26886	0.00129696	-0.654986	0.422154
202264	chr1	86627650	86628349	Stable	2.5978	0.000163527	3.51395	0.00041966	-1.24021	0.0696645
202265	chr1	86628500	86629299	Stable	2.29567	0.00041944	3.83249	0.00041966	-0.992207	0.138829
202266	chr1	86629700	86632799	Stable	2.9661	5.95291e-05	3.90484	0.00041966	-0.835755	0.214223
202267	chr1	86632850	86634699	Stable	3.63371	1.89063e-05	3.88276	0.00041966	-0.515503	0.472574
202268	chr1	86636400	86636649	Stable	2.33926	0.000330098	3.16501	0.000900316	-0.691765	0.351261
202269	chr1	86636900	86637199	Stable	2.16959	0.00076352	2.77994	0.00194828	-0.434306	0.569854
202270	chr1	86637350	86638149	Stable	1.12391	0.0294329	3.30445	0.000436338	-1.31339	0.0544471
202274	chr1	86642350	86643299	Stable	2.88984	0.000140035	3.88422	0.00041966	-0.846342	0.198697
202275	chr1	86643350	86644899	Stable	2.96656	5.10391e-05	4.65314	0.00041966	-1.3879	0.051162
202277	chr1	86648300	86648549	Stable	1.39281	0.0115398	3.13689	0.00436548	-0.79397	0.231408
202281	chr1	86703100	86704649	Stable	4.26171	1.55559e-05	3.81077	0.000422747	-0.104993	0.912178
202283	chr1	86752450	86752549	Stable	1.44289	0.0208684	3.21033	0.000868381	-1.7113	0.0528861
202284	chr1	86753250	86753399	Stable	1.71814	0.00608319	2.67061	0.0128512	-0.312042	0.771473
202288	chr1	87013000	87013299	Stable	1.86472	0.00303461	2.93115	0.000505445	-0.517555	0.414186
202289	chr1	87013450	87014149	Stable	3.13734	3.1287e-05	2.65278	0.00153767	-0.0339381	0.975256
202290	chr1	87031050	87031349	Stable	2.09658	0.000748443	3.30721	0.000479317	-0.614997	0.374963
202292	chr1	87035250	87037049	Stable	3.65739	1.88954e-05	3.11853	0.000611124	0.675397	0.328475
202293	chr1	87037600	87037799	Stable	2.67611	0.000106669	1.27316	0.0387416	0.43308	0.577469
202294	chr1	87040450	87040849	Stable	2.21948	0.00181117	2.92512	0.000911544	-0.132574	0.878902
202295	chr1	87040950	87041049	Stable	2.32547	0.000476002	3.03331	0.000559029	0.107505	0.90447
202297	chr1	87078050	87078249	Stable	3.15334	3.09272e-05	2.75632	0.00097329	-0.130711	0.877541
202298	chr1	87078550	87078749	Stable	2.13863	0.000530374	3.56828	0.0013058	0.259152	0.763843
202300	chr1	87174500	87174649	Stable	1.47568	0.00722237	2.50564	0.001446	0.501473	0.435024
202301	chr1	87175550	87175849	Stable	1.77249	0.003148	3.13129	0.00191373	-0.5989	0.425506
202302	chr1	87176050	87176799	Stable	2.51722	0.000156363	2.92702	0.000824953	0.00488804	0.996344
202303	chr1	87177250	87177399	Stable	2.09818	0.00059076	3.08502	0.0048727	-0.584215	0.360219
202304	chr1	87177450	87178049	Stable	3.07091	0.000115272	2.60119	0.00122872	-0.267594	0.713626
202306	chr1	87179100	87179999	Stable	2.39837	0.000213836	3.48695	0.00041966	-0.824298	0.180999
202307	chr1	87180100	87181099	Stable	3.78204	2.23541e-05	5.02619	0.00041966	-0.99124	0.201629
202308	chr1	87181150	87182049	Stable	3.74239	1.93605e-05	3.65264	0.00042488	-0.758763	0.290081
202309	chr1	87182100	87182799	Stable	2.25771	0.000493725	3.50312	0.000470608	-0.925456	0.1683
202310	chr1	87182850	87183149	Stable	1.95093	0.00112556	2.56399	0.00183351	-0.38421	0.615979
202311	chr1	87183650	87183799	Stable	1.33229	0.0400709	2.04582	0.00527509	-1.11579	0.0903974
202313	chr1	87184400	87184499	Stable	1.25667	0.0307771	2.02551	0.00224032	-1.66708	0.0507615
202314	chr1	87212900	87214999	Stable	4.86363	1.55559e-05	3.91054	0.00041966	0.44057	0.587654
202315	chr1	87326350	87326849	Stable	2.49973	0.000255824	2.84448	0.00103942	-0.211923	0.794089
202316	chr1	87327000	87328199	Stable	3.4637	2.28194e-05	4.10422	0.00041966	-0.0747202	0.940748
202318	chr1	87455500	87457199	Stable	3.21335	3.16174e-05	3.43634	0.000445045	0.164708	0.84674
202319	chr1	87457400	87457699	Stable	2.60618	0.000124299	2.13175	0.00873254	0.460805	0.490764
202320	chr1	87458400	87458549	Stable	3.1467	0.000445558	1.46662	0.0101864	1.02227	0.118825
202328	chr1	87482900	87483199	Stable	4.08516	5.18125e-05	1.64435	0.00665779	0.790694	0.24621
202329	chr1	87483250	87483549	Stable	1.84279	0.00168236	3.50418	0.000422747	-0.0157902	0.987852
202330	chr1	87483900	87488049	Stable	3.58901	1.70734e-05	3.99993	0.00041966	-0.208072	0.792972
202331	chr1	87488750	87488999	Stable	2.49332	0.000258951	3.09702	0.000782084	-0.353865	0.691078
202332	chr1	87491000	87491199	Stable	2.58206	0.000119852	2.19533	0.00184979	-0.349954	0.621318
202333	chr1	87491250	87492449	Stable	2.82046	8.60269e-05	3.12844	0.000468999	-0.137065	0.871482
202334	chr1	87492650	87494249	Stable	3.14437	5.4128e-05	3.19747	0.000453331	-0.268467	0.711916
202335	chr1	87502700	87502799	Stable	2.08879	0.000579695	3.14536	0.000488768	0.000361705	0.999731
202336	chr1	87503050	87503499	Stable	3.20536	2.8627e-05	1.79277	0.00394809	1.25548	0.0586727
202359	chr1	87547050	87547449	Stable	3.0353	4.6903e-05	1.58689	0.0199343	1.14873	0.128513
202360	chr1	87547750	87550099	Stable	3.50822	1.92898e-05	2.76758	0.000779099	0.925736	0.157549
202361	chr1	87550150	87551149	Stable	4.90004	1.55559e-05	4.19773	0.000436053	0.686042	0.331849
202362	chr1	87551250	87554149	Stable	4.49509	1.55559e-05	4.15955	0.00041966	0.643877	0.345589
202363	chr1	87554200	87555099	Stable	3.39777	2.10905e-05	3.13312	0.000525481	0.301384	0.673646
202370	chr1	87574200	87575649	Stable	2.8652	5.56549e-05	2.31744	0.00123699	1.26662	0.0578258
202377	chr1	87593500	87593849	Stable	2.4741	0.000162859	2.36094	0.00964984	1.63162	0.0502107
202384	chr1	87601950	87602049	Stable	2.38341	0.000677178	2.13215	0.0137341	0.227718	0.81024
202404	chr1	87636900	87637149	Stable	2.33332	0.000424809	1.33614	0.0127166	0.7737	0.247376
202405	chr1	87637200	87637899	Stable	3.35935	2.71633e-05	2.62392	0.000734547	0.716483	0.287499
202408	chr1	87643050	87643399	Stable	2.54851	0.000160222	1.38983	0.0299283	0.859003	0.23658
202422	chr1	87689850	87690099	Stable	2.49086	0.000734814	2.29699	0.001175	0.371753	0.578296
202431	chr1	87740900	87741449	Stable	3.36602	2.32983e-05	2.6486	0.0010324	0.568697	0.37276
202432	chr1	87755200	87755899	Stable	3.72616	1.85869e-05	4.15704	0.000506239	-0.440462	0.530916
202433	chr1	87756000	87757299	Stable	3.44078	2.70844e-05	4.10096	0.00041966	-0.129457	0.894999
202435	chr1	87839950	87840499	Stable	2.52969	0.000199481	2.12552	0.00149236	0.390122	0.56573
202436	chr1	87840750	87841049	Stable	3.23519	3.46942e-05	2.45174	0.0027976	0.53799	0.518516
202439	chr1	87846550	87847149	Stable	3.08148	0.00012165	3.33028	0.000542743	-0.957686	0.138256
202440	chr1	87847400	87848749	Stable	3.02499	4.36307e-05	3.25129	0.000445523	-0.533904	0.420675
202441	chr1	87848850	87849999	Stable	2.83204	7.13962e-05	3.41099	0.000427633	-0.875334	0.168444
202442	chr1	87852300	87853199	Stable	3.36207	2.85529e-05	3.84407	0.00041966	-0.440291	0.537716
202443	chr1	87853250	87854349	Stable	3.97419	1.55559e-05	3.64906	0.000453257	0.562099	0.44403
202444	chr1	87872300	87872399	Stable	2.87153	9.58282e-05	1.47978	0.0155045	0.671598	0.326013
202446	chr1	87879400	87879549	Stable	2.52321	0.000196333	2.8232	0.0175231	0.242536	0.753934
202447	chr1	87879800	87880499	Stable	2.61674	0.000108161	3.52728	0.00041966	-0.448611	0.487263
202449	chr1	88007650	88008949	Stable	4.37001	1.55559e-05	4.15391	0.00041966	-0.108784	0.908752
202450	chr1	88009050	88009199	Stable	3.29907	2.44061e-05	1.47505	0.0280789	0.315787	0.655401
202451	chr1	88088200	88088399	Stable	1.34284	0.0271315	3.56919	0.00110382	-1.18193	0.143822
202452	chr1	88093950	88097549	Stable	3.18985	3.22189e-05	3.79827	0.00041966	-0.399562	0.560867
202453	chr1	88097700	88098199	Stable	2.66399	0.000103358	3.45891	0.00041966	-0.316794	0.648947
202454	chr1	88098300	88098499	Stable	2.04246	0.000953614	2.12663	0.00279759	-0.0558892	0.953992
202455	chr1	88098550	88098749	Stable	2.29598	0.000914353	3.05105	0.000730659	0.503744	0.441974
202456	chr1	88099800	88100249	Stable	1.70373	0.00260005	2.6869	0.000798152	-0.465853	0.471511
202457	chr1	88101600	88106149	Stable	3.68012	1.6308e-05	4.04599	0.00041966	-0.457772	0.4946
202458	chr1	88106750	88107399	Stable	1.63882	0.00359619	3.21527	0.000499401	-0.947635	0.137309
202459	chr1	88107550	88109149	Stable	2.58893	0.000133273	3.8651	0.00041966	-0.770834	0.239406
202460	chr1	88109200	88110199	Stable	3.34887	2.33835e-05	3.55916	0.00041966	-0.496303	0.446734
202461	chr1	88110300	88110399	Stable	1.35314	0.0109996	2.65891	0.00176991	-0.366213	0.597486
202462	chr1	88120800	88121249	Stable	2.17878	0.00108316	3.21322	0.000481106	-0.732081	0.263952
202465	chr1	88128600	88129049	Stable	2.1236	0.00065036	3.29289	0.00126005	-0.44615	0.540047
202466	chr1	88129800	88130199	Stable	2.02042	0.00076283	3.33415	0.00164087	-0.0265253	0.978634
202467	chr1	88133350	88137499	Stable	3.74459	1.58924e-05	4.56853	0.00041966	-0.583739	0.360463
202469	chr1	88139600	88141649	Stable	3.19744	2.93998e-05	4.14153	0.00041966	-0.482036	0.465094
202470	chr1	88144550	88144999	Stable	1.79675	0.00225941	2.82227	0.000840135	-0.58921	0.383129
202471	chr1	88150400	88150549	Stable	1.09612	0.0327601	3.16903	0.000808216	-0.291426	0.73706
202472	chr1	88164900	88164999	Stable	2.32433	0.00030355	2.7864	0.000964858	-0.405006	0.546552
202473	chr1	88261400	88262449	Stable	2.09256	0.00061022	3.13496	0.00046221	-0.927126	0.138384
202474	chr1	88262600	88263949	Stable	2.15054	0.000561008	2.98683	0.000490841	-0.794238	0.197743
202475	chr1	88276350	88277599	Stable	2.98692	5.5761e-05	3.32007	0.00048998	-0.101245	0.918929
202476	chr1	88277700	88278249	Stable	2.76181	8.46646e-05	2.98361	0.00054441	0.132645	0.880929
202478	chr1	88462900	88463399	Stable	3.36338	3.0183e-05	1.60657	0.0095205	1.38537	0.0755471
202481	chr1	88473050	88473349	Stable	1.15782	0.0284754	3.43186	0.000527468	-0.867197	0.168877
202482	chr1	88473750	88474599	Stable	2.96635	5.82919e-05	3.76233	0.00041966	-0.679579	0.305809
202483	chr1	88474800	88476599	Stable	3.41324	2.84978e-05	3.74083	0.000459832	-0.223442	0.812205
202484	chr1	88525100	88526099	Stable	3.82879	1.55559e-05	2.31406	0.0014388	0.890043	0.175886
202485	chr1	88526650	88526849	Stable	2.22109	0.000614354	3.68257	0.000874334	-0.243805	0.764796
202486	chr1	88526900	88527099	Stable	2.27339	0.000308923	1.76288	0.0433208	1.24774	0.17054
202487	chr1	88533300	88534449	Stable	3.42722	3.2346e-05	3.42171	0.000428607	0.135205	0.879601
202488	chr1	88534500	88534899	Stable	2.04606	0.00690235	3.09325	0.00389503	-0.851496	0.322167
202489	chr1	88534950	88535349	Stable	2.62012	0.000267591	2.39558	0.0014256	-0.702941	0.369065
202492	chr1	88539150	88539899	Stable	2.81599	8.95913e-05	2.36294	0.00997023	0.540732	0.517725
202493	chr1	88661600	88662799	Stable	2.32797	0.000256264	3.312	0.00042401	-0.731048	0.235066
202494	chr1	88663100	88663949	Stable	2.75943	9.773e-05	3.60214	0.000451028	-0.937359	0.184328
202495	chr1	88699100	88699349	Stable	2.99186	0.000261655	1.39774	0.0129809	1.09482	0.0890907
202496	chr1	88699950	88700799	Stable	3.06018	7.90509e-05	2.89689	0.000739953	-0.186405	0.851431
202497	chr1	88700900	88702699	Stable	3.73738	1.79473e-05	3.9131	0.00041966	-0.218537	0.802716
202498	chr1	88706150	88706399	Stable	2.34855	0.000510514	2.8577	0.00108112	-0.368332	0.623395
202499	chr1	88706700	88706799	Stable	1.16556	0.0430998	3.11136	0.00101546	-1.00624	0.20684
202500	chr1	88994550	88994649	Stable	1.49021	0.0187977	2.4962	0.0026279	-0.740597	0.280097
202503	chr1	89020600	89020899	Stable	1.51468	0.00846976	3.18769	0.00126802	-0.974158	0.222804
202506	chr1	89032900	89033099	Stable	1.66888	0.0112924	2.52297	0.000815516	-0.354047	0.682229
202507	chr1	89033250	89033399	Stable	1.51524	0.00853947	2.94585	0.000676666	-0.936636	0.203762
202508	chr1	89033550	89033649	Stable	1.40555	0.0172329	1.98529	0.00221544	-0.827994	0.282157
202510	chr1	89068300	89069199	Stable	3.46703	2.08474e-05	2.99606	0.000522087	0.299936	0.687797
202511	chr1	89069250	89070049	Stable	4.1167	1.55559e-05	3.42332	0.000484319	0.25181	0.776435
202512	chr1	89070350	89071499	Stable	4.04505	1.6881e-05	4.17293	0.00041966	0.332155	0.668334
202514	chr1	89081450	89081849	Stable	2.98161	4.55316e-05	1.38121	0.0103736	0.606841	0.339709
202515	chr1	89092200	89092699	Stable	2.59754	0.000116175	2.80385	0.000663939	-0.281298	0.69658
202516	chr1	89092850	89093199	Stable	2.37722	0.000429757	2.85249	0.00100177	-0.166587	0.840459
202518	chr1	89104200	89104699	Stable	2.67145	0.000125967	2.63358	0.00278778	0.670682	0.398897
202519	chr1	89105000	89105099	Stable	3.13419	0.000143496	1.46422	0.0167813	0.476734	0.526857
202521	chr1	89107700	89109149	Stable	3.28659	3.00321e-05	2.1294	0.00410312	1.00028	0.177263
202523	chr1	89120600	89122749	Stable	2.64192	0.000115671	3.95982	0.000421443	-0.637181	0.342953
202524	chr1	89123150	89125299	Stable	3.00631	4.66702e-05	3.22679	0.000590735	-0.577906	0.380843
202525	chr1	89131200	89131399	Stable	1.9976	0.00208849	1.85374	0.0145185	-0.113784	0.920912
202526	chr1	89131950	89132099	Stable	2.28973	0.00178804	2.00469	0.0032366	-0.685975	0.273598
202527	chr1	89245550	89245799	Stable	3.91144	4.58319e-05	1.79636	0.020265	0.784774	0.358764
202528	chr1	89353250	89353349	Stable	3.19411	4.20931e-05	1.69199	0.0104155	0.899728	0.244547
202529	chr1	89353400	89353749	Stable	2.78898	8.86615e-05	1.55763	0.0128923	0.918511	0.194062
202531	chr1	89454100	89454549	Stable	2.45714	0.000178113	3.09968	0.00093031	-0.0501809	0.961656
202532	chr1	89454750	89456399	Stable	3.5922	2.02117e-05	2.85697	0.000959588	0.475321	0.52837
202533	chr1	89456900	89457199	Stable	2.77404	0.00022952	2.31268	0.00135374	0.233307	0.769114
202534	chr1	89462700	89462899	Stable	2.96286	5.12624e-05	3.5251	0.00368037	0.0642802	0.955359
202535	chr1	89463100	89463549	Stable	2.87842	0.000243483	1.55154	0.0091071	0.67028	0.284882
202536	chr1	89523600	89524249	Stable	2.94188	6.13621e-05	3.05176	0.000486865	-0.312294	0.658768
202538	chr1	89526450	89526649	Stable	2.7268	0.000123561	1.92426	0.011571	0.253749	0.790548
202539	chr1	89529800	89529999	Stable	1.98893	0.000931257	3.03843	0.00233254	0.301751	0.673962
202540	chr1	89531300	89531549	Stable	2.11609	0.000550511	2.19127	0.0294009	0.533366	0.527651
202541	chr1	89534550	89534649	Stable	2.3923	0.00243298	2.86823	0.000821764	-0.730813	0.338777
202542	chr1	89534700	89535299	Stable	2.6831	8.88501e-05	2.49217	0.000832854	-0.455301	0.48022
202543	chr1	89535450	89536599	Stable	2.77665	7.03227e-05	3.36669	0.00042401	-0.553655	0.381022
202544	chr1	89543000	89543299	Stable	1.51936	0.0150776	2.81025	0.00103609	-1.37851	0.102268
202545	chr1	89543550	89545199	Stable	2.08574	0.000654943	3.85407	0.00041966	-1.28526	0.055043
202546	chr1	89545250	89546899	Stable	2.66263	9.43978e-05	3.70277	0.00041966	-1.17295	0.0735621
202549	chr1	89551500	89551599	Stable	2.0192	0.00784695	2.34635	0.00158547	-1.038	0.131034
202550	chr1	89552400	89552599	Stable	2.45894	0.000172106	2.57053	0.000955135	-0.848281	0.181572
202551	chr1	89552750	89553749	Stable	2.36757	0.000255682	3.39934	0.000654729	-0.978148	0.137889
202552	chr1	89553800	89556499	Stable	2.47609	0.000175339	3.56061	0.000428934	-0.750776	0.255619
202553	chr1	89557750	89558599	Stable	2.31097	0.000371777	3.43094	0.000645267	-0.930039	0.15401
202554	chr1	89559600	89559699	Stable	1.46803	0.00786759	2.55809	0.00270954	-1.16381	0.118486
202556	chr1	89562900	89563549	Stable	1.43142	0.00776783	3.50278	0.00047284	-0.899086	0.151447
202557	chr1	89565350	89565749	Stable	2.9123	0.000166494	3.06282	0.00130844	-0.646232	0.387281
202558	chr1	89566100	89571449	Stable	3.67964	1.64869e-05	4.19497	0.00041966	-0.442458	0.514382
202559	chr1	89572000	89572199	Stable	2.85387	0.000105364	2.52401	0.000955375	-0.0645285	0.951607
202560	chr1	89574800	89575199	Stable	1.63233	0.00451161	2.79988	0.000584259	-0.50881	0.422109
202561	chr1	89575350	89575599	Stable	3.34227	9.24171e-05	2.56928	0.00266384	0.270604	0.779048
202562	chr1	89576000	89577699	Stable	3.86465	1.55559e-05	3.69968	0.000440172	0.105015	0.904963
202563	chr1	89579550	89581249	Stable	3.65378	1.9511e-05	3.4797	0.000802935	0.445014	0.553631
202564	chr1	89601000	89601099	Stable	2.01091	0.00158839	3.2731	0.00129154	-0.775928	0.354588
202566	chr1	89656500	89656599	Stable	1.34111	0.0170038	1.54005	0.0126039	-0.585312	0.351963
202567	chr1	89656850	89657349	Stable	1.47112	0.0184939	3.22127	0.000792264	-0.787693	0.352158
202568	chr1	89730250	89731249	Stable	2.74527	8.31956e-05	3.1885	0.000445514	0.126742	0.881721
202573	chr1	89771950	89772049	Stable	1.63746	0.00987858	2.78526	0.00914153	0.0774106	0.957601
202574	chr1	89784100	89784849	Stable	2.81142	0.000123547	2.87764	0.000921927	-0.0701215	0.945821
202575	chr1	89784950	89785299	Stable	2.79746	0.000114344	2.36399	0.00136035	-0.0357115	0.97457
202577	chr1	89869850	89869999	Stable	2.38373	0.00155362	2.28871	0.00381764	-0.273721	0.775494
202578	chr1	89870500	89871499	Stable	3.75621	1.62545e-05	2.56159	0.00136136	0.575678	0.41951
202579	chr1	90050350	90051299	Stable	3.32511	2.58878e-05	3.76291	0.000442937	-0.626571	0.363714
202580	chr1	90052100	90052399	Stable	1.61802	0.00870959	3.73492	0.00041966	-0.84784	0.227268
202582	chr1	90061150	90061249	Stable	1.81144	0.00298789	2.34801	0.0015641	0.387736	0.600103
202584	chr1	90100050	90100599	Stable	2.73477	0.000107488	3.16355	0.000730907	0.373699	0.613587
202585	chr1	90100750	90101399	Stable	2.77606	0.000140847	2.80264	0.000795245	0.475579	0.531153
202588	chr1	90163050	90163249	Stable	1.53476	0.0076225	3.46581	0.000436053	-1.00261	0.125951
202589	chr1	90163650	90164649	Stable	2.60492	0.000186881	3.97887	0.00041966	-0.850449	0.174693
202591	chr1	90176000	90176299	Stable	1.58388	0.0195342	2.76111	0.00224328	-0.171904	0.875659
202592	chr1	90203550	90208749	Stable	3.91316	1.55559e-05	4.13069	0.00041966	-0.00792602	0.993945
202593	chr1	90209050	90209299	Stable	1.80734	0.00183562	2.59153	0.00114853	-0.293934	0.682687
202595	chr1	90220700	90220799	Stable	1.19688	0.0215346	2.88805	0.0011341	-1.30048	0.0547457
202597	chr1	90223100	90223449	Stable	2.32608	0.000257767	3.25206	0.0015971	-0.433917	0.507766
202598	chr1	90224250	90232099	Stable	3.86727	1.56388e-05	4.11181	0.00041966	-0.140738	0.877197
202599	chr1	90232300	90232599	Stable	2.33101	0.000314823	2.83077	0.00195468	-0.481305	0.504557
202600	chr1	90232800	90235649	Stable	3.43682	2.28154e-05	4.22398	0.00041966	-0.48826	0.480278
202601	chr1	90235700	90236449	Stable	2.93504	7.6881e-05	3.38774	0.000447837	-0.392402	0.585817
202602	chr1	90239150	90239299	Stable	2.78877	7.63351e-05	1.16509	0.0344203	0.197801	0.822212
202603	chr1	90242250	90242449	Stable	1.66042	0.0146908	2.68139	0.00094106	-0.822973	0.207958
202604	chr1	90242750	90243099	Stable	2.44841	0.000180626	3.43186	0.000527468	0.132481	0.878853
202605	chr1	90249250	90249549	Stable	3.25053	4.83867e-05	1.61958	0.014128	0.435771	0.587146
202606	chr1	90252250	90252349	Stable	1.83463	0.00318812	1.49532	0.0384095	0.125376	0.917281
202607	chr1	90253150	90253399	Stable	2.95088	0.000245187	1.86446	0.00723852	0.448831	0.552295
202608	chr1	90256350	90256499	Stable	2.83919	7.01838e-05	2.85399	0.000548401	0.206813	0.793667
202610	chr1	90257250	90257399	Stable	1.66957	0.00703206	2.04067	0.00480663	-0.291256	0.769878
202611	chr1	90258350	90258749	Stable	2.66294	0.000128208	2.18936	0.00137746	-0.280858	0.702658
202612	chr1	90258800	90258949	Stable	1.32307	0.0169147	2.65027	0.00227178	-1.04595	0.123794
202613	chr1	90259100	90259999	Stable	1.77962	0.00265452	3.08972	0.00063353	-0.691671	0.317357
202614	chr1	90260200	90263299	Stable	3.14622	3.139e-05	2.894	0.000539355	-0.266161	0.715148
202615	chr1	90265700	90265999	Stable	2.64584	0.000693413	2.98159	0.0020333	-0.658908	0.300345
202616	chr1	90266100	90266199	Stable	2.53387	0.000468663	1.75825	0.0094977	0.266918	0.795192
202617	chr1	90267100	90267249	Stable	3.02169	0.000116565	2.09255	0.00400049	-0.463999	0.534749
202619	chr1	90269150	90269449	Stable	2.83887	8.30394e-05	2.60781	0.000869324	0.700983	0.257883
202620	chr1	90269750	90274099	Stable	3.35564	2.41736e-05	3.29712	0.00050146	0.408131	0.568807
202621	chr1	90274450	90274699	Stable	2.54677	0.000220858	2.35978	0.00103776	0.498399	0.486336
202622	chr1	90274950	90275049	Stable	2.23779	0.00128009	2.96606	0.00137706	0.496938	0.474725
202623	chr1	90275450	90277449	Stable	3.32166	3.05398e-05	1.9193	0.00699278	1.13789	0.113169
202624	chr1	90277600	90277849	Stable	2.69152	0.000139705	2.22872	0.00363433	1.01485	0.153283
202625	chr1	90277900	90278049	Stable	1.77084	0.0081083	3.08491	0.00220942	0.223078	0.822292
202626	chr1	90278250	90279099	Stable	3.50374	2.18687e-05	2.22565	0.00126783	1.13254	0.0864987
202627	chr1	90279650	90279749	Stable	2.52408	0.000208066	1.33207	0.0377523	1.53496	0.0716061
202628	chr1	90279900	90280049	Stable	2.0945	0.00102412	1.63014	0.0146814	1.22965	0.0789138
202629	chr1	90285300	90285399	Stable	2.77987	0.000106191	2.12172	0.00544412	0.444217	0.56542
202630	chr1	90289000	90289199	Stable	2.91812	0.000132282	1.69406	0.00435565	0.316722	0.727934
202631	chr1	90289450	90289749	Stable	2.30934	0.000293248	1.73804	0.0108593	0.720333	0.249876
202633	chr1	90326950	90327149	Stable	1.27506	0.0255857	2.65807	0.00114582	-0.764212	0.334988
202635	chr1	90333550	90333799	Stable	2.3666	0.00027307	1.88963	0.041462	0.451471	0.654235
202636	chr1	90333950	90334999	Stable	3.09982	6.49706e-05	2.8619	0.000921575	0.231281	0.817173
202637	chr1	90335400	90337399	Stable	3.11288	5.32775e-05	3.10291	0.000455779	0.477256	0.492278
202638	chr1	90337500	90338349	Stable	3.32465	2.5067e-05	2.72843	0.00073957	0.3503	0.627432
202639	chr1	90357350	90357549	Stable	3.16678	3.29579e-05	2.75157	0.0129144	0.403708	0.584856
202640	chr1	90358850	90360099	Stable	3.5054	2.44126e-05	3.11673	0.000583215	0.763651	0.242356
202641	chr1	90360400	90361299	Stable	3.37955	2.43663e-05	2.82259	0.000744142	0.688136	0.297144
202642	chr1	90361400	90361649	Stable	2.41327	0.000210337	1.99024	0.0163416	1.24981	0.0843878
202644	chr1	90363850	90364549	Stable	2.87213	0.000102763	1.61559	0.0161829	1.21443	0.106496
202645	chr1	90378100	90378249	Stable	1.73257	0.00408015	2.66514	0.00173154	0.130148	0.889948
202646	chr1	90378300	90379249	Stable	3.18285	3.3961e-05	2.85036	0.000605024	0.187486	0.816497
202647	chr1	90379450	90380349	Stable	3.77179	1.56059e-05	2.81167	0.000631877	0.469979	0.48142
202648	chr1	90380650	90380899	Stable	3.08207	0.000101149	2.03418	0.012954	1.20193	0.0834056
202649	chr1	90381350	90381649	Stable	2.64206	0.000209598	1.85504	0.0084917	0.753097	0.277723
202651	chr1	90441700	90442399	Stable	3.32486	2.32351e-05	2.15711	0.00391604	1.21625	0.0730297
202652	chr1	90442550	90443499	Stable	3.20797	3.34581e-05	1.95971	0.00308514	1.0554	0.125947
202654	chr1	90445300	90445799	Stable	2.69926	0.000217064	1.34229	0.0296424	0.96721	0.182494
202655	chr1	90447250	90447399	Stable	2.74421	0.000169817	1.96392	0.0108748	0.69534	0.358639
202657	chr1	90461600	90461849	Stable	2.87332	8.73404e-05	1.29403	0.028491	1.04751	0.1526
202658	chr1	90462150	90462299	Stable	2.07406	0.0013771	1.53201	0.0200491	0.580079	0.478656
202662	chr1	90480400	90480799	Stable	3.14777	3.9841e-05	1.62434	0.020981	0.72352	0.360519
202663	chr1	90480850	90481249	Stable	2.17721	0.00102369	2.30684	0.00150361	0.479129	0.557371
202664	chr1	90481650	90482549	Stable	3.07985	8.06123e-05	3.26724	0.000674786	0.218361	0.814112
202673	chr1	90503100	90503599	Stable	3.02646	8.55104e-05	1.12122	0.0285289	1.4093	0.058636
202677	chr1	90505450	90506649	Stable	2.9061	8.24991e-05	2.1297	0.00230588	1.20283	0.109123
202678	chr1	90507550	90507799	Stable	4.44686	1.55559e-05	2.74695	0.00129276	0.878865	0.183362
202680	chr1	90509200	90509449	Stable	2.95624	8.28573e-05	1.88646	0.0100316	1.11554	0.132425
202697	chr1	90536100	90536799	Stable	3.06042	4.45216e-05	2.52192	0.00265644	0.853295	0.276056
202698	chr1	90536900	90537049	Stable	2.98315	0.000330999	1.6192	0.00653329	0.683897	0.295789
202702	chr1	90566150	90566249	Stable	2.86697	0.000375777	1.99028	0.0024854	0.803305	0.260785
202706	chr1	90587550	90588499	Stable	4.41189	1.55559e-05	2.78394	0.000832316	0.884965	0.231958
202707	chr1	90588650	90588849	Stable	1.60936	0.0104918	2.67297	0.000761201	0.24263	0.812622
202708	chr1	90588950	90589049	Stable	1.68808	0.00288031	1.95959	0.00813299	0.649626	0.366468
202709	chr1	90590150	90591399	Stable	3.27201	2.51574e-05	2.08051	0.00228707	0.840011	0.178999
202710	chr1	90592350	90592749	Stable	2.88508	6.99641e-05	2.57081	0.000780113	0.710852	0.248791
202712	chr1	90601650	90602299	Stable	1.86749	0.00141061	3.85947	0.00041976	-0.917021	0.156761
202713	chr1	90602500	90603249	Stable	2.82737	0.000607835	3.52481	0.00041976	-0.363741	0.684713
202714	chr1	90603450	90604399	Stable	3.47795	3.84214e-05	4.03714	0.00041966	-0.119196	0.899798
202715	chr1	90633350	90633599	Stable	2.10486	0.0021469	2.38534	0.0010324	-0.873429	0.211468
202716	chr1	90634150	90634499	Stable	1.82446	0.00183634	2.78807	0.000949114	-0.821637	0.204038
202717	chr1	90650350	90653749	Stable	3.84865	1.56394e-05	3.33087	0.000447837	0.252081	0.758185
202718	chr1	90669350	90669749	Stable	2.8711	6.58835e-05	1.80519	0.0106163	0.347601	0.692404
202719	chr1	90669800	90670049	Stable	1.48511	0.00749752	2.39523	0.0040716	-0.271557	0.727184
202720	chr1	90675650	90677399	Stable	3.36133	2.49075e-05	2.77339	0.000852722	0.279963	0.724898
202721	chr1	90677900	90678099	Stable	2.62745	0.000106689	2.58984	0.0115314	0.675923	0.52321
202723	chr1	90690450	90691499	Stable	3.35575	2.9282e-05	2.42727	0.00109056	0.822736	0.217533
202724	chr1	90691650	90691899	Stable	2.08709	0.000838968	1.79078	0.0399254	0.457094	0.635151
202727	chr1	90718250	90719949	Stable	3.01553	6.4159e-05	2.73181	0.000726612	0.385824	0.603812
202730	chr1	90737750	90738049	Stable	2.80829	8.30292e-05	2.57376	0.00087271	0.8956	0.161663
202731	chr1	90738150	90738899	Stable	2.84099	6.49908e-05	3.00058	0.000611311	0.0906565	0.924093
202732	chr1	90739450	90739649	Stable	2.30865	0.00031788	2.45018	0.00118655	0.201892	0.800959
202733	chr1	90740000	90740599	Stable	2.8433	7.63096e-05	2.5833	0.000735731	0.450614	0.485533
202734	chr1	90740750	90740899	Stable	2.26098	0.000947575	3.08601	0.000696276	-0.143825	0.890389
202737	chr1	90743400	90744049	Stable	3.10714	7.18224e-05	2.50536	0.0018892	0.484027	0.587191
202738	chr1	90744350	90746449	Stable	2.90537	6.3718e-05	2.90324	0.000565608	0.0194624	0.985452
202739	chr1	90748650	90750299	Stable	2.9694	5.5436e-05	2.93408	0.000816263	-0.0832676	0.930211
202740	chr1	90750450	90750999	Stable	2.71657	8.2339e-05	2.83915	0.00193329	0.213347	0.793576
202742	chr1	90753200	90754799	Stable	3.41888	2.42606e-05	3.09347	0.000515635	0.05044	0.960422
202745	chr1	90834250	90834899	Stable	2.57521	0.000137209	3.49303	0.000482863	-0.568009	0.362324
202746	chr1	90835050	90836399	Stable	2.55483	0.0001327	3.01898	0.000515312	-0.814099	0.195918
202747	chr1	90836800	90840499	Stable	3.82758	1.56059e-05	4.18051	0.00041966	-0.383524	0.591264
202748	chr1	90840600	90841149	Stable	3.03527	6.65057e-05	2.73689	0.000996993	-0.144211	0.871887
202749	chr1	90841250	90841849	Stable	2.64703	9.82864e-05	2.4236	0.00112484	-0.205507	0.798946
202750	chr1	90841950	90843999	Stable	3.82202	1.55559e-05	4.15056	0.00041966	-0.256086	0.736185
202751	chr1	90844100	90845099	Stable	3.30195	3.26648e-05	3.7307	0.000522893	-0.271566	0.719088
202752	chr1	90845400	90845699	Stable	2.02901	0.00129839	2.81149	0.0013257	-0.209783	0.798943
202753	chr1	90895900	90896649	Stable	3.04805	5.64951e-05	2.4738	0.000947997	0.222407	0.789272
202754	chr1	90896800	90897799	Stable	3.34637	2.86643e-05	3.68566	0.00041966	0.0202464	0.984705
202755	chr1	90899850	90900499	Stable	2.86284	8.19399e-05	2.50398	0.00340633	1.20761	0.0823443
202756	chr1	90900650	90901049	Stable	2.89145	5.83039e-05	1.64061	0.0395566	1.2425	0.119549
202757	chr1	90901150	90901449	Stable	2.76724	0.00024708	1.26544	0.0154378	1.17	0.109905
202759	chr1	90902950	90903499	Stable	3.10239	9.03505e-05	2.48173	0.000906597	0.149898	0.868324
202760	chr1	90903650	90904199	Stable	3.25365	3.67784e-05	2.72956	0.00107626	0.17512	0.858345
202761	chr1	90904650	90904949	Stable	2.64297	0.000150791	1.87366	0.00444622	0.200113	0.802379
202762	chr1	90905150	90905249	Stable	2.22968	0.00108527	2.32624	0.00530591	0.708449	0.313201
202763	chr1	90973150	90973299	Stable	3.05242	4.92227e-05	2.48782	0.00146511	0.0628313	0.949982
202764	chr1	90973500	90974399	Stable	2.39446	0.000279491	3.51868	0.000476591	-0.403544	0.578295
202765	chr1	90974500	90974649	Stable	2.60124	0.000141842	2.40291	0.00145422	-0.363684	0.613007
202767	chr1	90975300	90976199	Stable	2.31126	0.000269908	3.71573	0.00041966	-1.04738	0.100769
202768	chr1	90998150	90999849	Stable	3.79308	1.9716e-05	3.88957	0.000421443	-0.0324851	0.97564
202769	chr1	91021900	91025299	Stable	3.05727	4.9951e-05	4.02466	0.00041966	-0.716971	0.262259
202770	chr1	91041700	91042149	Stable	2.75698	9.04597e-05	2.00373	0.00243344	-0.152356	0.861282
202773	chr1	91051950	91053299	Stable	3.3855	2.53743e-05	3.64113	0.000528383	0.0494273	0.963068
202774	chr1	91053400	91056349	Stable	3.35733	2.313e-05	3.69085	0.00041966	0.0181818	0.98607
202775	chr1	91057350	91057999	Stable	2.35742	0.000300261	3.23237	0.000443428	-0.346409	0.624958
202776	chr1	91058100	91058749	Stable	2.59689	0.000144474	2.76802	0.00074297	-0.569523	0.380353
202777	chr1	91061000	91061149	Stable	2.37314	0.00112546	2.26496	0.00125743	-0.560322	0.445443
202778	chr1	91061200	91061399	Stable	2.55773	0.000328659	1.64197	0.0128324	0.809722	0.277922
202779	chr1	91061750	91061899	Stable	1.96896	0.000993804	2.8295	0.000871191	0.0258488	0.979253
202780	chr1	91062100	91062649	Stable	3.08336	3.61126e-05	2.82136	0.000906597	-0.0938475	0.917267
202781	chr1	91063850	91064149	Stable	2.43351	0.00025439	3.22308	0.000604246	0.288463	0.709535
202782	chr1	91064350	91066149	Stable	3.18905	3.75997e-05	3.11281	0.000457724	0.0422671	0.964591
202783	chr1	91076200	91076399	Stable	1.78825	0.00468485	2.85627	0.00306789	-0.0188214	0.988012
202784	chr1	91076500	91076749	Stable	2.62136	0.000109525	2.5294	0.00265331	0.0611039	0.950585
202785	chr1	91077050	91078449	Stable	3.30717	2.48917e-05	3.39164	0.00041966	-0.350847	0.611362
202786	chr1	91095000	91095249	Stable	3.6061	3.7371e-05	3.39896	0.00191378	-0.0111498	0.991754
202787	chr1	91095400	91096649	Stable	2.66764	9.49139e-05	3.07313	0.000628311	-0.628795	0.339254
202789	chr1	91098900	91098999	Stable	3.25286	9.39801e-05	2.3164	0.00239263	-0.297724	0.787294
202791	chr1	91210050	91210499	Stable	2.51591	0.000222268	2.93382	0.00075937	0.674047	0.315201
202792	chr1	91210850	91210999	Stable	2.62076	0.000202907	1.92266	0.00279672	0.814598	0.212623
202793	chr1	91216100	91216599	Stable	3.03695	3.91668e-05	2.99349	0.000791367	0.151187	0.869048
202794	chr1	91216750	91216899	Stable	2.12383	0.000568825	2.36001	0.00132315	-0.308624	0.669417
202795	chr1	91217000	91217549	Stable	2.76542	0.000132959	3.22099	0.00048945	-0.125561	0.8942
202798	chr1	91219200	91219499	Stable	1.90092	0.00171133	3.63826	0.00133727	-0.722986	0.330183
202799	chr1	91243400	91243599	Stable	1.50554	0.0100394	2.60065	0.00151349	-0.99282	0.154612
202800	chr1	91247000	91247149	Stable	1.60153	0.00470646	2.57989	0.000937301	-0.18049	0.826243
202801	chr1	91247750	91249349	Stable	3.25585	2.61384e-05	3.50171	0.000426324	-0.182163	0.827624
202802	chr1	91249500	91249949	Stable	3.20564	3.21442e-05	3.47978	0.000568662	0.0776006	0.938765
202803	chr1	91250300	91251399	Stable	4.01115	1.56388e-05	4.04436	0.00041966	0.0229383	0.984617
202804	chr1	91251650	91251749	Stable	2.0041	0.0012256	2.75131	0.000618579	-0.237762	0.779128
202805	chr1	91271400	91273849	Stable	3.93231	1.56904e-05	3.96474	0.00041966	0.21892	0.792877
202807	chr1	91301450	91301649	Stable	1.80574	0.00447606	2.18038	0.00210688	-0.188982	0.857947
202808	chr1	91301750	91302849	Stable	2.5187	0.000187935	3.34721	0.000422747	-0.500401	0.454241
[truncated: 79,858 more rows]

## Sheet: Other
Peak ID	Chromosome	Start	End	Type	pminput_FC	pminput_adjPval	ctrlinput_FC	ctrlinput_adjPval	pmctrl_FC	pmctrl_adjPval
200005	chr1	5015100	5015299	other	0.929693	0.0921023	4.14958	0.00041966	-0.878673	0.174625
200013	chr1	6277100	6277249	other	2.29195	0.000477656	1.04677	0.101426	0.555888	0.531825
200018	chr1	6285150	6285249	other	2.1211	0.000532034	1.08295	0.113815	1.43975	0.0662621
200028	chr1	6309150	6309299	other	2.12229	0.00109369	0.869268	0.0608566	0.697076	0.274906
200029	chr1	6309650	6309799	other	2.2585	0.000714564	0.753314	0.533127	2.63449	0.0698059
200030	chr1	6311550	6311799	other	3.09159	0.000100064	1.01621	0.198639	1.18419	0.0713366
200034	chr1	6330400	6330549	other	1.94968	0.0014459	1.03331	0.18471	1.54946	0.115383
200036	chr1	6453850	6453999	other	0.269636	0.628259	2.37191	0.00542695	-1.41123	0.0959964
200047	chr1	9564250	9564349	other	0.264476	0.661611	2.21373	0.0025012	-1.26804	0.160591
200049	chr1	9577000	9577349	other	0.589981	0.325857	3.18393	0.00197119	-1.58319	0.0987307
200072	chr1	10717650	10717849	other	0.342781	0.55168	2.75644	0.0011857	-1.47331	0.0882714
200082	chr1	10881250	10881449	other	0.385965	0.461229	2.51302	0.00124527	-0.751268	0.254705
200087	chr1	12692850	12692999	other	2.20456	0.000706848	1.23749	0.0602768	0.31712	0.667788
200088	chr1	12714550	12714749	other	0.980033	0.0570915	2.48729	0.0175576	-0.586398	0.533287
200093	chr1	13531800	13532049	other	1.07317	0.0539427	3.60705	0.00041966	-1.22731	0.0750722
200097	chr1	14162000	14162099	other	1.07193	0.0643668	1.51933	0.00751693	-0.663606	0.409569
200099	chr1	14163000	14163149	other	2.85728	0.00027114	0.630773	0.210707	1.56026	0.0788647
200120	chr1	14483900	14483999	other	1.13699	0.0328583	1.48935	0.101601	-0.371542	0.775425
200128	chr1	16216000	16216099	other	0.911643	0.0744451	2.21373	0.0025012	-0.531981	0.414186
200145	chr1	16626850	16627249	other	1.00751	0.0589257	3.35726	0.000573262	-0.983628	0.162354
200150	chr1	17164500	17164649	other	2.75019	7.78878e-05	1.37954	0.0552334	1.03084	0.113156
200165	chr1	17544550	17544799	other	2.25404	0.000453666	0.627677	0.41175	1.5868	0.103102
200166	chr1	17545150	17545299	other	2.55621	0.000193487	-0.135347	0.904632	2.19353	0.122943
200168	chr1	17553050	17553199	other	2.69573	0.000170642	0.499897	0.403481	1.24434	0.129968
200170	chr1	17568900	17569099	other	2.15264	0.000460497	0.837712	0.0654938	1.24828	0.0611603
200187	chr1	17609300	17609449	other	0.647943	0.187006	3.54202	0.000971452	-0.868348	0.171751
200208	chr1	20877450	20877549	other	0.0972711	0.840112	2.00477	0.00732992	-1.12369	0.0868214
200209	chr1	20882850	20882949	other	0.609018	0.304421	2.59384	0.00139312	-1.06324	0.209669
200214	chr1	20941850	20942049	other	2.89197	5.36102e-05	0.923724	0.0504548	1.23156	0.0624873
200224	chr1	21028000	21028699	other	3.44667	1.95266e-05	1.57782	0.059531	1.92807	0.0577218
200238	chr1	21147250	21147399	other	3.63386	2.43904e-05	-0.825763	0.430434	2.14863	0.109521
200255	chr1	23935250	23935349	other	2.21449	0.000944383	0.84837	0.351259	0.638802	0.415114
200256	chr1	23955550	23955649	other	0.289613	0.588038	1.97682	0.00923331	-1.25409	0.16291
200260	chr1	24107600	24107749	other	0.608043	0.269657	2.98103	0.00122356	-1.4106	0.0648926
200261	chr1	24553900	24553999	other	0.919044	0.0838784	2.48445	0.00254257	-1.04542	0.159983
200263	chr1	24679350	24679499	other	2.94431	6.44777e-05	1.01087	0.052971	0.899252	0.147341
200287	chr1	33725050	33725149	other	1.28992	0.0695476	1.92197	0.0545043	-0.166459	0.920995
200300	chr1	34033150	34033299	other	0.621878	0.244776	2.66029	0.000683112	-0.431689	0.575943
200302	chr1	34035900	34036049	other	2.50101	0.00398148	0.293719	0.596748	1.14395	0.176011
200303	chr1	34040400	34040499	other	3.15207	7.4327e-05	1.50545	0.0543596	1.1673	0.118091
200308	chr1	34061050	34061149	other	1.4398	0.0156751	1.13986	0.0958604	0.646726	0.380372
200317	chr1	34118550	34118649	other	0.394925	0.474906	2.3758	0.00637616	-0.408294	0.575029
200318	chr1	34120600	34120699	other	1.00718	0.217743	2.13917	0.00363076	-0.683608	0.607731
200329	chr1	34151700	34151799	other	0.199028	0.82509	1.53107	0.0253962	-0.938678	0.566257
200330	chr1	34154650	34154749	other	-0.729296	0.265909	1.68958	0.0086802	-2.07593	0.0667892
200332	chr1	34155500	34155649	other	-0.0384627	0.966812	3.03359	0.0138681	-2.50132	0.112014
200350	chr1	35992900	35993149	other	2.90227	0.000666372	1.17071	0.222943	1.2544	0.32052
200355	chr1	36019800	36019949	other	2.98946	0.000495543	0.798607	0.1095	0.291231	0.818427
200356	chr1	36021300	36021399	other	2.93349	6.44259e-05	1.19089	0.10516	0.904944	0.180946
200360	chr1	36059550	36059649	other	0.298966	0.606709	1.74279	0.0203128	-1.01807	0.279266
200399	chr1	36558950	36559099	other	1.95551	0.00157494	0.176013	0.775392	1.36565	0.115261
200401	chr1	36564450	36564999	other	3.29893	2.77424e-05	1.10865	0.0751889	1.09989	0.149633
200413	chr1	36603300	36603499	other	2.29673	0.000293394	1.28215	0.0648551	1.21614	0.14346
200423	chr1	36936850	36936949	other	2.49532	0.000877458	1.48044	0.101023	0.834673	0.274652
200449	chr1	38186600	38186799	other	2.56667	0.000463849	0.676369	0.228377	1.68013	0.0822578
200456	chr1	38229650	38229749	other	2.6016	0.000195135	1.72455	0.0875769	0.118248	0.917507
200467	chr1	38286200	38286299	other	2.38116	0.000619338	0.143993	0.894139	1.40956	0.29562
200472	chr1	38294050	38294299	other	0.716599	0.160965	3.69441	0.000796517	-0.165794	0.84046
200481	chr1	38321100	38321199	other	0.552767	0.331674	2.31824	0.00221441	-0.643601	0.329455
200487	chr1	38388650	38388749	other	1.64503	0.00802057	-0.0326023	0.958428	0.952599	0.255055
200491	chr1	38393550	38393699	other	2.73844	0.00025795	-0.791802	0.516146	2.24286	0.149682
200493	chr1	38394400	38394499	other	2.89498	0.00046955	0.537414	0.28202	1.26956	0.0974228
200494	chr1	38395350	38395949	other	3.23134	3.36676e-05	0.947956	0.0821717	1.39424	0.0698448
200502	chr1	38542750	38542899	other	2.67375	0.000118248	0.203964	0.794609	1.86356	0.056923
200531	chr1	38701500	38701649	other	2.32788	0.000632491	0.405147	0.575974	1.87719	0.0694901
200534	chr1	38736150	38736249	other	2.64439	0.000325356	0.613933	0.381773	0.854912	0.35909
200564	chr1	38973250	38973499	other	0.69576	0.192961	1.88715	0.00369597	-1.24503	0.0666101
200592	chr1	39889500	39889599	other	-0.180031	0.826212	2.26753	0.00988143	-1.43861	0.288734
200608	chr1	40227100	40227299	other	0.38879	0.423388	2.43087	0.000985572	-0.571891	0.392993
200614	chr1	40237350	40237499	other	0.848493	0.0850864	2.3692	0.00529962	-1.02718	0.105088
200618	chr1	40253750	40253849	other	0.454024	0.404147	2.65353	0.00933882	-0.608974	0.371569
200626	chr1	40326550	40326699	other	0.448561	0.377388	2.57382	0.00301426	-1.31365	0.0520931
200632	chr1	40372650	40372749	other	-0.257788	0.721012	2.14813	0.0281024	-1.81202	0.143846
200643	chr1	40392000	40392099	other	0.752084	0.243635	1.80365	0.00509465	-1.34903	0.0594056
200649	chr1	40402050	40402149	other	1.01758	0.0617825	2.87775	0.00305093	-0.659953	0.354149
200655	chr1	40421450	40421649	other	0.762059	0.166902	1.91342	0.00863162	-0.719306	0.385604
200657	chr1	40430100	40430199	other	0.283253	0.576697	2.04675	0.00362016	-1.35164	0.050843
200660	chr1	40431850	40431999	other	0.328783	0.641593	2.56665	0.000880784	-1.98803	0.0955627
200672	chr1	40471300	40471499	other	1.38422	0.0521728	2.48873	0.0023333	-1.46876	0.138825
200688	chr1	40788150	40788249	other	0.773975	0.192087	1.85397	0.00589579	-1.05171	0.22602
200689	chr1	40788400	40788549	other	2.37793	0.000484436	2.33463	0.055784	0.277649	0.842842
200703	chr1	40833600	40833799	other	0.362586	0.473972	2.64175	0.00251929	-1.2431	0.0942197
200715	chr1	40854100	40854299	other	0.448126	0.420039	2.51521	0.00151174	-1.57457	0.0681095
200722	chr1	40859450	40859549	other	0.610855	0.229392	1.96779	0.00494929	-0.133594	0.883318
200723	chr1	40866700	40866999	other	0.904714	0.117966	2.97394	0.000964459	-0.799097	0.382004
200725	chr1	40874550	40874799	other	2.20926	0.00125724	0.813034	0.152055	0.342555	0.749331
200733	chr1	41025500	41025699	other	2.7822	0.000866726	1.45197	0.11922	0.256208	0.835201
200734	chr1	41028450	41028599	other	-0.169174	0.798299	2.19704	0.00598578	-1.68605	0.0709513
200736	chr1	41037050	41037149	other	0.443102	0.40794	1.66554	0.0150627	-0.254858	0.78945
200739	chr1	41136750	41136899	other	2.69083	0.000121568	1.38212	0.106452	0.913104	0.334783
200757	chr1	43150950	43151049	other	0.852465	0.0971207	3.13741	0.00467267	-0.978334	0.146095
200758	chr1	43151250	43151349	other	1.7004	0.00350293	1.32212	0.0617315	1.25479	0.0951628
200762	chr1	43156350	43156449	other	2.28361	0.000325189	0.566971	0.427354	1.96648	0.05349
200775	chr1	43201200	43201349	other	2.85162	7.49164e-05	1.29103	0.237274	1.67052	0.176991
200776	chr1	43201500	43201649	other	0.636249	0.211762	2.84431	0.000922999	-1.24165	0.0976722
200778	chr1	43202500	43202799	other	3.34126	0.00102059	1.08242	0.194684	0.858273	0.404162
200789	chr1	43251100	43251199	other	1.20536	0.0237589	0.670633	0.590397	0.199939	0.928411
200804	chr1	43767200	43767399	other	0.250562	0.672487	3.31572	0.000451995	-0.915215	0.199312
200813	chr1	43968300	43968399	other	2.34067	0.000500011	0.772353	0.118043	1.09504	0.0897519
200828	chr1	44567800	44567899	other	2.18412	0.00060095	1.25393	0.115905	1.26885	0.0572267
200835	chr1	44680100	44680299	other	0.468553	0.335228	2.61017	0.00196365	-1.46403	0.0647311
200846	chr1	44807300	44807399	other	1.79275	0.00200838	0.97871	0.0886703	0.551579	0.454342
200857	chr1	44851550	44851649	other	2.8331	0.00012944	1.20303	0.0805087	1.3455	0.0781194
200858	chr1	44852150	44852249	other	1.47383	0.00783395	1.33878	0.0911923	0.130066	0.92411
200861	chr1	44867000	44867099	other	1.95429	0.0028098	0.177415	0.668223	0.230552	0.77005
200866	chr1	44877700	44877799	other	2.38003	0.000844496	0.691505	0.501806	1.76492	0.140882
200873	chr1	44983400	44983499	other	1.7786	0.0025963	1.05654	0.0662336	0.764895	0.22675
200902	chr1	45092850	45093049	other	1.34507	0.0561075	3.13018	0.000957095	-1.36598	0.0548843
200904	chr1	45112800	45113049	other	0.865736	0.102437	2.53194	0.00186674	-1.07189	0.148316
200920	chr1	45144600	45144699	other	0.944326	0.0685217	2.11534	0.00293851	-1.41175	0.0503607
200923	chr1	45181200	45181349	other	1.02721	0.119756	2.55476	0.00192848	-0.917006	0.382126
200935	chr1	45286450	45286649	other	0.549138	0.264107	2.64512	0.00148968	-1.08327	0.12129
200944	chr1	45302700	45302849	other	2.53052	0.000220559	0.578776	0.478293	1.5379	0.147619
200956	chr1	45321700	45321799	other	2.08985	0.000716677	1.5456	0.0629849	1.29481	0.127196
200967	chr1	45449350	45449449	other	2.41916	0.000233775	0.755001	0.140478	0.713843	0.308714
200975	chr1	45481300	45481449	other	0.749059	0.164257	2.50526	0.00138118	-0.9861	0.174273
200979	chr1	45531200	45531399	other	3.22293	7.67221e-05	1.3904	0.0725808	1.00492	0.282157
200983	chr1	45539400	45539499	other	2.74038	0.000384	0.450029	0.305716	1.09712	0.102417
201003	chr1	45701000	45701099	other	2.56017	0.000138202	1.69357	0.10361	0.531805	0.697442
201004	chr1	45713700	45713849	other	0.936522	0.0666955	2.67502	0.00126924	-0.968399	0.137072
201009	chr1	45754600	45754749	other	3.51016	2.40258e-05	0.701383	0.116273	1.11225	0.120681
201017	chr1	45768850	45768949	other	2.07745	0.00295586	0.755001	0.140478	1.11227	0.22843
201019	chr1	45825950	45826099	other	2.64219	0.000149795	0.599902	0.555935	1.5166	0.234087
201025	chr1	45844000	45844199	other	3.13723	0.000176543	0.323741	0.463745	1.49397	0.0534174
201034	chr1	46066950	46067049	other	2.49241	0.000585089	1.72455	0.0875769	1.32984	0.100869
201036	chr1	46850950	46851049	other	1.33674	0.0140739	0.728806	0.392453	0.596431	0.396962
201038	chr1	46863500	46863649	other	1.02708	0.065311	2.36849	0.00238271	-1.13895	0.127978
201051	chr1	51217550	51217649	other	0.891762	0.130372	2.3872	0.00101609	-0.882769	0.23892
201053	chr1	51239150	51239249	other	0.512442	0.370485	2.81714	0.000689134	-0.856434	0.327067
201055	chr1	51242500	51242599	other	1.38326	0.0867154	2.36549	0.00253137	-1.38368	0.294206
201064	chr1	51294000	51294099	other	2.40547	0.000996146	1.05036	0.0901479	0.666191	0.322366
201078	chr1	51759100	51759249	other	2.91207	0.000305198	-0.808987	0.088406	1.6624	0.0908141
201110	chr1	52800800	52800949	other	0.799378	0.15119	2.43328	0.00112418	-0.629119	0.36079
201118	chr1	53353000	53353149	other	2.89104	0.000238485	0.859909	0.287539	1.65965	0.050791
201121	chr1	53763500	53763599	other	-0.127481	0.791879	1.53363	0.0579256	-0.595644	0.551084
201130	chr1	54128750	54128899	other	0.820741	0.221385	2.98744	0.000982524	-1.31243	0.131085
201142	chr1	54714100	54714449	other	1.03631	0.0515227	3.29378	0.000430937	-1.2087	0.0675682
201148	chr1	54905950	54906149	other	0.846226	0.0950206	2.60634	0.000771107	-1.25317	0.0685472
201152	chr1	54912400	54912499	other	-0.0102104	0.983918	2.06264	0.00862029	-0.896313	0.268337
201156	chr1	54924450	54924699	other	0.76802	0.152293	2.76441	0.00174894	-1.5457	0.0560582
201160	chr1	54950350	54950549	other	0.56689	0.337943	3.15531	0.00364867	-1.24635	0.0858971
201161	chr1	54951850	54952049	other	0.749082	0.157921	2.83742	0.000746846	-0.98294	0.17462
201185	chr1	55162950	55163049	other	0.479034	0.409605	1.42804	0.034683	-0.474326	0.622919
201197	chr1	56700900	56700999	other	0.555786	0.275078	2.13278	0.00220942	-0.671094	0.360403
201198	chr1	56966000	56966299	other	0.733428	0.190711	2.84075	0.000961493	-1.09793	0.16423
201200	chr1	57015050	57015199	other	0.47314	0.327987	1.4911	0.0469395	-0.838643	0.317794
201212	chr1	57189350	57189749	other	2.61202	0.000117796	1.70916	0.0854281	1.3141	0.119645
201226	chr1	57906900	57907049	other	-0.0115144	0.981038	2.12913	0.00192848	-1.17423	0.080091
201235	chr1	58111300	58111599	other	2.91275	5.87642e-05	1.16103	0.0833248	0.624884	0.386968
201263	chr1	58352350	58352449	other	0.747052	0.158265	-0.725081	0.401249	1.25303	0.247087
201267	chr1	58362250	58362599	other	3.38157	2.19743e-05	1.1513	0.20652	1.78184	0.0768331
201283	chr1	58654500	58654649	other	0.945141	0.0603472	2.78434	0.00103361	-1.23056	0.0822578
201289	chr1	58676400	58676499	other	0.834497	0.103835	2.30563	0.00597498	-0.862231	0.268848
201298	chr1	58716200	58716449	other	0.999187	0.054888	2.79674	0.00136363	-1.38717	0.0656628
201302	chr1	58728850	58729449	other	1.15441	0.0702646	2.75543	0.000669259	-1.79071	0.0641425
201312	chr1	58770450	58770649	other	1.01572	0.0546094	2.15591	0.00189357	-0.375038	0.58704
201317	chr1	58854000	58854199	other	1.12204	0.0698919	2.17443	0.00366099	-1.34582	0.065936
201322	chr1	58897300	58897499	other	1.0114	0.0909587	2.33657	0.00122707	-1.15188	0.108649
201326	chr1	58946900	58947099	other	0.220646	0.707662	2.49612	0.00276068	-1.7313	0.0771481
201335	chr1	59163200	59163399	other	-0.00839167	0.987253	2.96634	0.00105897	-1.41369	0.0901116
201342	chr1	59316700	59316799	other	1.07981	0.0957493	2.3072	0.0065863	-0.908637	0.167763
201348	chr1	59627750	59627899	other	-0.628147	0.300291	2.83385	0.00158505	-0.653984	0.536925
201378	chr1	60859450	60859699	other	0.72935	0.191337	2.62742	0.0015648	-0.267051	0.79428
201385	chr1	62447800	62447949	other	0.730223	0.178432	2.20727	0.00189348	-0.436464	0.538879
201405	chr1	62737300	62737399	other	1.01387	0.132059	2.40767	0.00194566	-1.75284	0.0965367
201406	chr1	62742350	62742449	other	2.39698	0.000848062	0.888551	0.0836583	0.675163	0.436923
201427	chr1	62887700	62887799	other	2.64219	0.000149795	-1.03257	0.281007	1.7769	0.118243
201453	chr1	63964300	63964549	other	3.40757	3.33139e-05	0.954742	0.103818	1.34767	0.0953553
201465	chr1	64209000	64209149	other	2.65288	0.000156712	1.49148	0.0545066	1.04091	0.190905
201467	chr1	64221600	64221949	other	3.00598	5.22296e-05	1.21425	0.119353	1.79206	0.0763155
201473	chr1	64287350	64287549	other	0.856321	0.139115	2.39168	0.00141957	-0.744615	0.227592
201494	chr1	64566250	64566399	other	2.44539	0.000199503	0.71153	0.231153	0.70933	0.373078
201504	chr1	64666300	64666399	other	-0.0158257	0.974129	2.24149	0.0015607	-1.1836	0.0870126
201507	chr1	64690000	64690099	other	0.237269	0.615177	2.1546	0.0204986	-1.29082	0.05925
201509	chr1	64716100	64716199	other	1.67344	0.00549523	-0.0880059	0.943182	1.42498	0.366624
201526	chr1	64799900	64799999	other	2.11991	0.000629826	0.507485	0.610326	1.37519	0.261137
201552	chr1	64888200	64888449	other	3.10178	7.00102e-05	1.0778	0.0563468	0.391567	0.568732
201556	chr1	64916450	64916649	other	2.23601	0.000395457	0.645394	0.260903	1.5846	0.0582788
201573	chr1	65245150	65245399	other	2.79906	6.73254e-05	2.18919	0.0572676	0.830867	0.252296
201591	chr1	69343200	69343349	other	0.628221	0.201549	2.97038	0.000582399	-0.894472	0.178715
201599	chr1	69684300	69684549	other	2.64218	0.000324884	0.715057	0.279662	1.26623	0.0598581
201604	chr1	70918900	70918999	other	0.354404	0.480109	1.95192	0.0209573	-1.30273	0.0613961
201616	chr1	71664300	71664399	other	2.0041	0.0012256	0.837818	0.161903	0.555888	0.531825
201620	chr1	71683250	71683349	other	0.799378	0.15119	2.99243	0.00178931	-0.947157	0.154774
201624	chr1	71689350	71689599	other	-0.0202457	0.978169	2.18734	0.00197453	-1.84911	0.102452
201648	chr1	71802900	71802999	other	0.804282	0.128702	2.04847	0.00285536	-0.901547	0.189532
201651	chr1	71804850	71804949	other	0.741723	0.151855	2.56912	0.00244051	-0.990394	0.162126
201659	chr1	71831250	71831449	other	0.908621	0.0914865	2.54806	0.00207699	-1.34906	0.076926
201660	chr1	71831800	71831949	other	0.837498	0.113902	2.59471	0.0130962	-0.765947	0.334845
201661	chr1	71844950	71845049	other	1.02542	0.0510823	2.23932	0.0169711	-0.311539	0.660695
201665	chr1	71855100	71855199	other	2.18415	0.000592169	1.32212	0.0617315	0.606131	0.417684
201682	chr1	71902900	71903099	other	3.67141	1.87138e-05	0.504694	0.228723	0.900051	0.149497
201696	chr1	71940400	71940549	other	1.19247	0.0674119	2.69544	0.000646791	-0.954105	0.280177
201700	chr1	71943300	71943499	other	0.921385	0.0777692	3.14564	0.000650748	-1.1388	0.0889161
201706	chr1	71952700	71952799	other	2.55514	0.00146992	1.30783	0.0727146	-0.0150492	0.988862
201738	chr1	71995000	71995099	other	0.9266	0.0867014	2.58639	0.00081903	-0.546572	0.437541
201757	chr1	72028800	72028949	other	2.33551	0.0009656	0.990691	0.0958428	0.670616	0.383355
201767	chr1	72065750	72065899	other	2.35368	0.000291381	0.921471	0.105804	1.13934	0.0955434
201775	chr1	72079350	72079499	other	0.981045	0.0601418	2.43035	0.00103007	-0.53515	0.43304
201793	chr1	72124550	72124649	other	0.418034	0.588666	1.08116	0.136269	-1.7737	0.163173
201795	chr1	72144400	72144499	other	-0.216524	0.689777	2.50909	0.000893865	-1.66015	0.0505007
201814	chr1	72448900	72449099	other	0.110851	0.899077	2.34161	0.00101687	-2.94999	0.0539395
201815	chr1	72449500	72449699	other	-0.253855	0.676386	2.43404	0.00206684	-1.79495	0.0661563
201820	chr1	72538150	72538249	other	-0.00654659	0.993517	2.26539	0.0029267	-2.03357	0.138261
201823	chr1	72564200	72564349	other	-0.584622	0.431812	2.76741	0.000719698	-2.55416	0.0525674
201839	chr1	73956850	73956999	other	2.15863	0.00055226	0.748574	0.313225	0.721756	0.465989
201846	chr1	73968300	73968399	other	0.206362	0.667703	1.6192	0.00653329	-0.823462	0.1983
201856	chr1	74002000	74002149	other	2.21967	0.000391316	1.2632	0.0717781	0.817355	0.238671
201862	chr1	74024600	74024699	other	1.90691	0.00119801	-0.211291	0.830748	2.06122	0.107079
201868	chr1	74033400	74033549	other	2.51539	0.000170974	1.12765	0.132605	1.41603	0.115159
201870	chr1	74035450	74035549	other	2.38013	0.000469849	1.65496	0.118054	0.69905	0.295455
[truncated: 12,377 more rows]

## Sheet: HH_sensitive
Peak ID	Chromosome	Start	End	Type	pminput_FC	pminput_adjPval	ctrlinput_FC	ctrlinput_adjPval	pmctrl_FC	pmctrl_adjPval
[truncated: 2,272 more rows]

[truncated: 1 more sheets: HH_dependent]
